# Supplementary material
Source: HighWire-hosted journal article supplement (doi:10.1101/rna.038430.113)
Supplement: SuppLegends.docx [file SuppLegends.docx]

# Supplementary Material

## Supplementary Figure S1

Effect of RNAi on the half-lives of bulk trypanosome mRNA.

(A) RNA was prepared from bloodstream-form trypanosomes, with or without RNAi. (A-F) Trypanosomes without (WT) or with RNAi (24h induction) were incubated with Sinefungin and Actinomycin D, and total RNA was prepared at various times thereafter. The RNA was separated by agarose gel electrophoresis and examined by Northern blotting, using an oligonucleotide complementary to the spliced leader as probe. A typical blot is shown, with the methylene blue stained rRNA (used for normalization) beneath. The area containing mRNA is indicated and the *SLRNA* (*trans* splicing precursor) is indicated by an arrow.

The overall half-life of *SL*-bearing mRNA is expressed as arithmetic mean half-life ± standard deviation for three independent experiments. RNAi was as follows: A. none (wild-type); B. *XRNA* C. *RRP45*; D. *PAN2*; E. *CNOT10*; F. *CAF1*. The reductions in the target RNAs after RNAi could be quantified for CAF1 (10% remaining) but not for the other lines because the signals were too low. All cell lines, however, showed strong growth inhibition after 2-3 days of RNAi induction. For the *XRNA* RNAi, the stabilisation of *EP* mRNA was assessed to check that the RNAi had worked, because the *EP* mRNA has a half-life of less than 10 min in wild-type cells but is much more stable after *XRNA* RNAi ([Li et al. 2006](#_ENREF_39)).) Panel G compares RNAs taken without Actinomycin D or Sinefungin.

## Supplementary Figure S2

Quantitation of three replicate blots of the type shown in Figure 1. The three replicates are shown by different symbols as indicated on the wild-type panel. The pink lines were drawn manually; they suggest consistent deviation from exponential kinetics for the *CNOT10* and *CAF1* RNAi samples.

## Supplementary Figure S3

Reproducibility of the RNASeq data. RPM for all 7557 unique open reading frames are plotted: each ORF is represented by a dot, with the value for one replicate on the x-axis and the other on the y-axis; log10 scale. Reads that aligned to untranslated regions or other transcripts such as snoRNAs are not included. The grey solid lines show the 5 RPM cut-off for steady-state transcripts; the dashed diagonals indicate the line of perfect correlation. The numbers of reads that aligned to open reading frames for the two replicates are shown in the bottom right corner of the relevant graphs. Because of the log scale, ORFs which had no reads are not shown.

## Supplementary Figure S4

RNAi targeting the exosome increases the relative abundance of snoRNA precursors from a cluster on chromosome 8.

The map of part of a snoRNA cluster immediately upstream of Tb927.8.1610 is shown. Some of the sequences are identical, as indicated by the lines above the locus. The open reading frame for Tb927.8.1610 is the most recent one according to the database annotation (see http://www.genedb.org/Homepage/Tbruceibrucei927 or http://tritrypdb.org/tritrypdb/)

Below, raw read alignments, displayed in Artemis, are shown as screen shots. Each small horizontal line represents a single read. Reads should mostly be from snoRNA precursors, since mature snoRNAs are too small to be sequenced by the procedure used. Similarities in the patterns reflect sequence repeats.

The read counts over the snoRNA region can be higher after Actinomycin D than at steady state because the amounts seen are relative, rather than absolute. Since, after 30 min, about 60% of the mRNA has disappeared, the relative amounts of more stable RNAs in the sequenced mixture increase. The results suggest that the snoRNA precursors are relatively stable in cells with RRP45 RNAi.

## Supplementary Figure S5

RNAi targeting the exosome increases the relative abundance of snoRNA precursors from a cluster on chromosome 6.

The two panels show Artemis screen shots of averaged aligned reads between locus Tb927.6.1850 and Tb927.6.1870 (see http://www.genedb.org/Homepage/Tbruceibrucei927 or http://tritrypdb.org/tritrypdb/).

The red line represents wild-type, green is RRP45 depletion, at steady state and 30 min after transcription inhibition. Similarities in the patterns reflect sequence repeats.

## Supplementary Table S1

ORF read counts for WT and all RNAi lines for the duplicate RNAseq runs. WT data are taken from ([Manful et al. 2011](#_ENREF_46)). The list of RPM values for unique open reading frames is on a second sheet.

## Supplementary Table S2

Half-lives for all genes fitting cut-off criteria (see Methods). The values are replaced by “NA” when the cut-off criteria are not met.

## Supplementary Table S3

Genes showing differential expression at steady state in knockdown cell lines (p-adjusted-value < 0.01). Descriptive columns were added such as gene description, functional class and the change in the transcript half-life (half-life increase > 2x is color-coded pink; half-life decrease < 2x is coded light green). The sheet titled “Class enrichment” contains lists of gene classes that were enriched in either the increased or decreased unique transcripts at steady state in all knockdown lines.
