# Supplementary material
Source: HighWire-hosted journal article supplement (doi:10.1101/rna.038430.113)
Supplement: Supplementary_Figure_S5.pdf [file Supplementary_Figure_S5.pdf]

Supplementary Figure S5

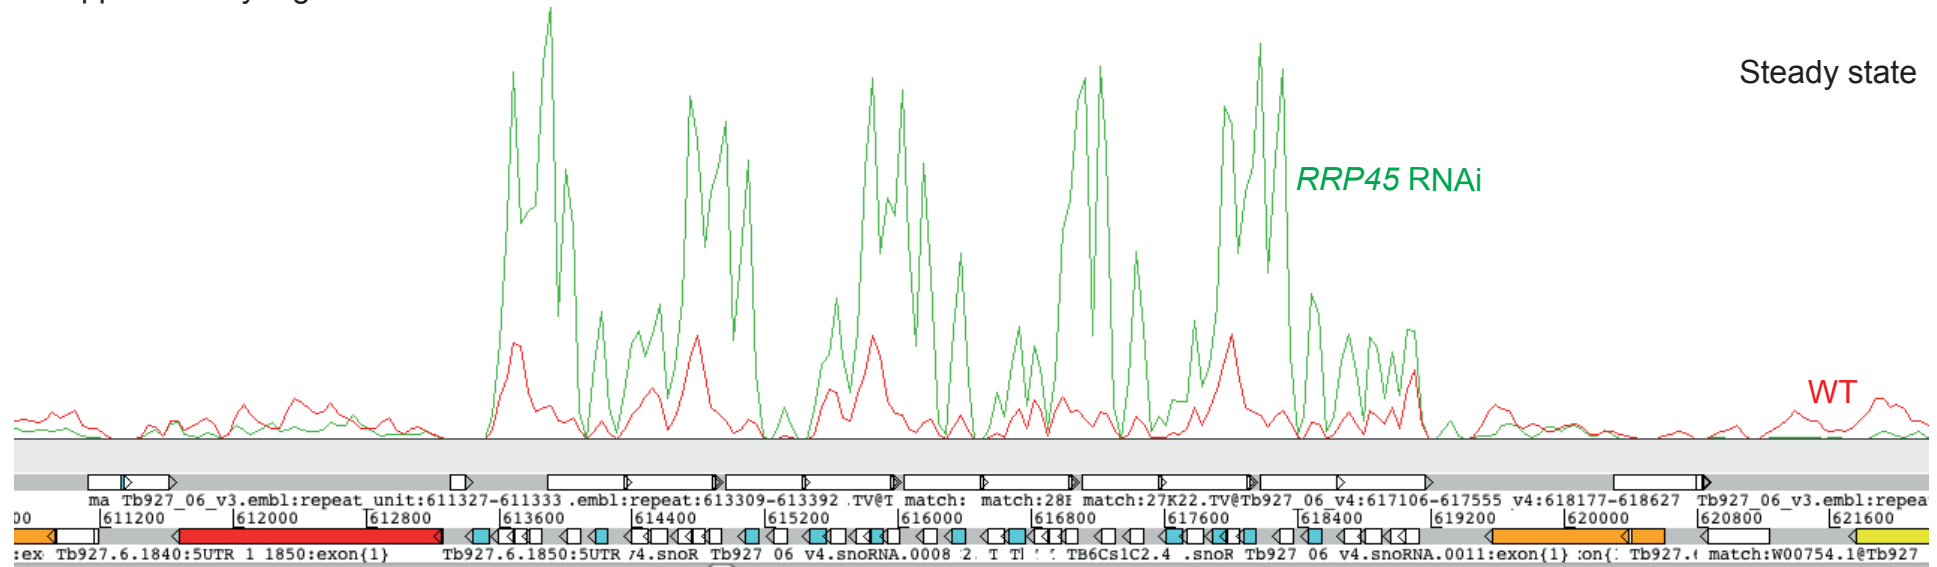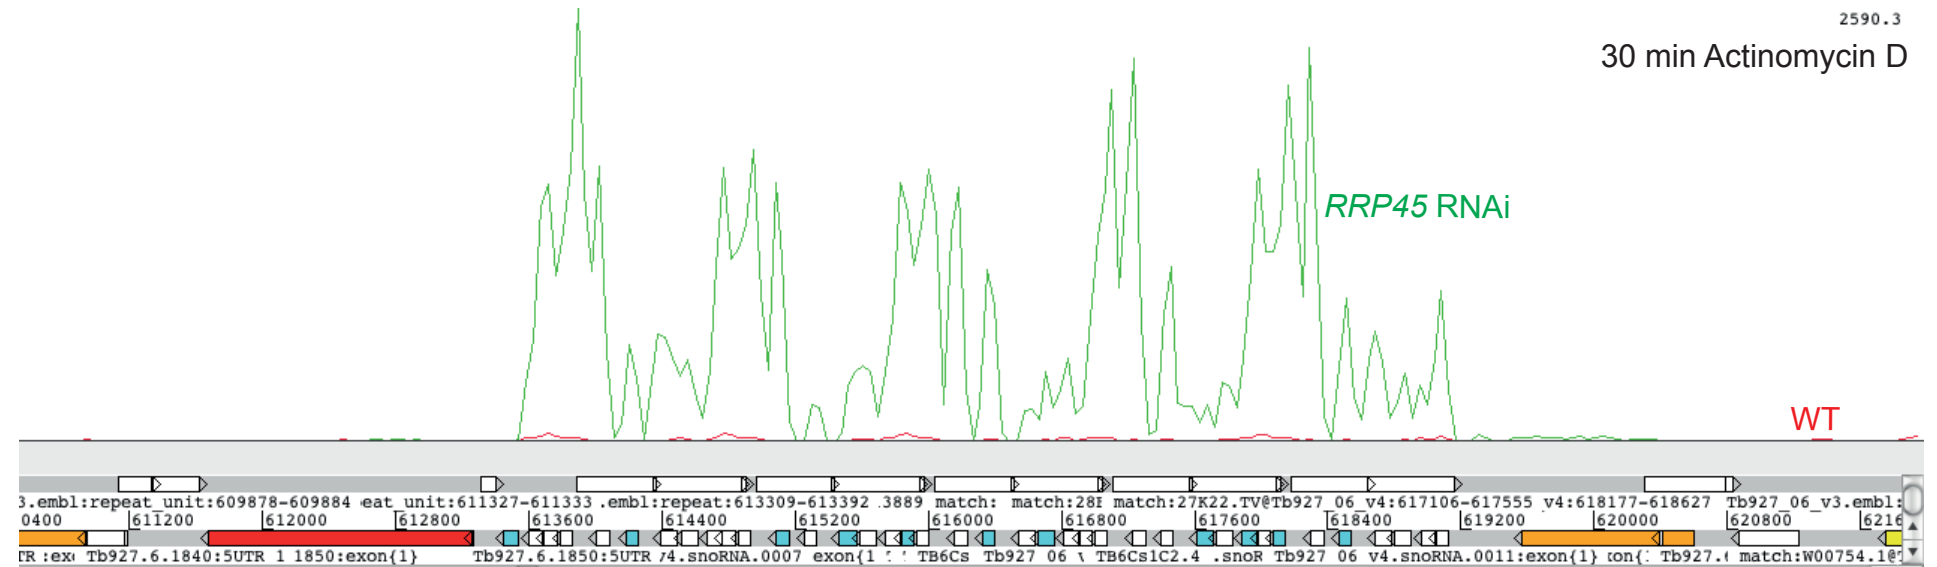

30 min Actinomycin D

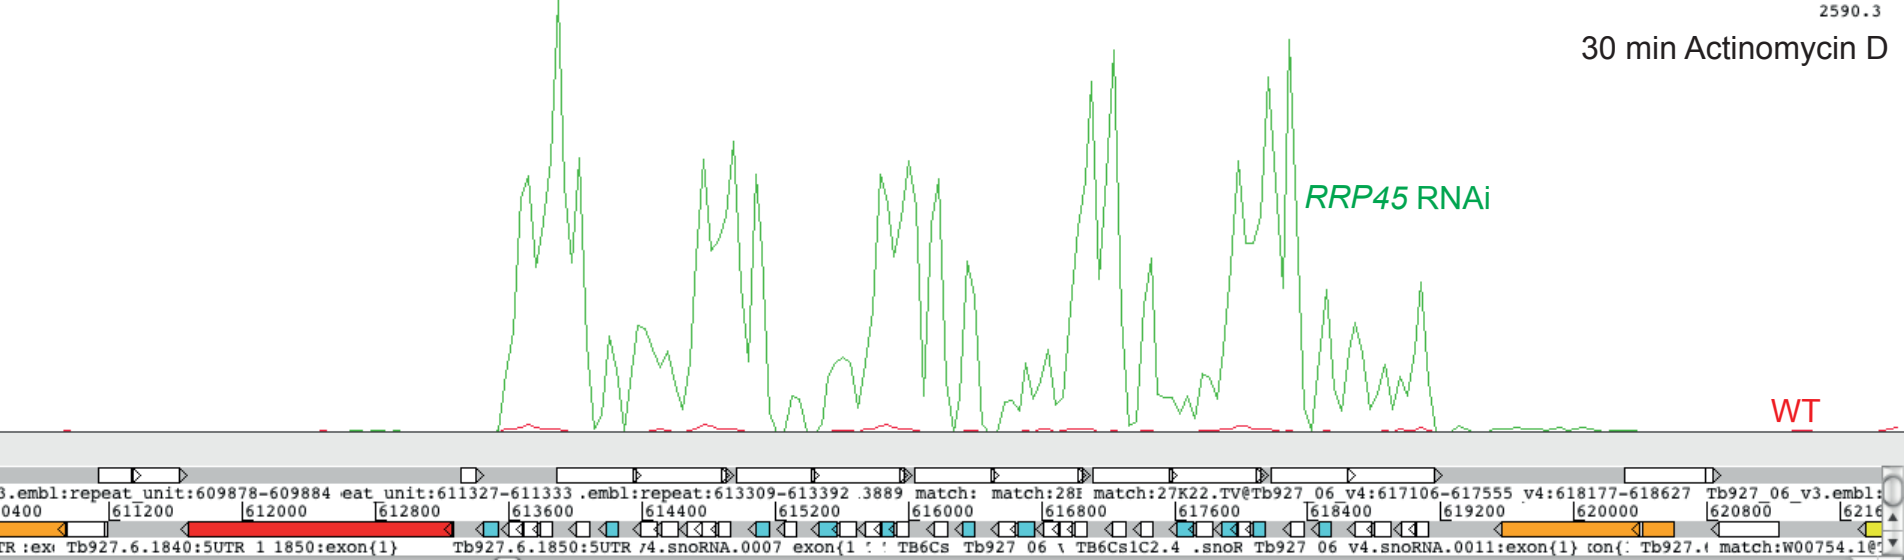

*RRP45 RNAi*

*WT*

3.embl:repeat unit:609878-609884 eat unit:611327-611333 .embl:repeat:613309-613392 .3889 match: match:28I match:27K22.TV@Tb927\_06\_v4:617106-617555 v4:618177-618627 Tb927\_06\_v3.embl:  
 0400 |611200 |612000 |612800 |613600 |614400 |615200 |616000 |616800 |617600 |618400 |619200 |620000 |620800 |621600  
 TR:ex: Tb927.6.1840:5UTR 1 1850:exon(1) Tb927.6.1850:5UTR 74.snRNA.0007 exon(1) TB6Cs Tb927\_06 \ TB6Cs1C2.4 .snOR Tb927\_06\_v4.snRNA.0011:exon(1) con(: Tb927.6 match:W00754.1@
