# Supplementary material
Source: HighWire-hosted journal article supplement (doi:10.1101/rna.038430.113)
Supplement: Supplementary_Table_S1.xlsx [file Supplementary_Table_S1.xlsx]

## Sheet: All genes
gene	Length	WT t0-1	WT t0-2	WT t30-1	WT t30-2	PAN2 t0-1	PAN2 t0-2	PAN2 t30-1	PAN2 t30-2	RRP45 t0_1	RRP45 t0_2	RRP45 t30_1	RRP45 t30_2	CAF1 t0-1	CAF1 t0-2	CAF1 t30-1	CAF1 t30-2	CNOT10 t0-1	CNOT10 t0-2	CNOT10 t30-1	CNOT10 t30-2
Tb04.24M18.150	489	51	26	17	22	64	50	18	22	28	17	10	1	23	19	5	9	43	58	7	8
Tb04.3I12.100	456	32	7	9	11	91	24	43	76	4	5	1	1	11	2	5	12	11	22	12	3
Tb05.28F8.200	510	18	23	8	11	27	25	22	25	2	8	12	1	6	9	9	13	16	73	9	10
Tb05.30F7.410	510	5	4	4	10	13	3	14	13	0	1	2	0	0	2	2	2	0	3	4	1
Tb06.3A7.270	3408	338	180	93	72	133	100	23	51	35	28	34	8	79	51	14	34	139	160	19	18
Tb06.3A7.960	933	300	480	201	212	148	72	71	419	46	27	70	16	221	317	414	362	227	861	527	281
Tb07.26A24.210	453	7	4	1	4	22	10	38	27	8	5	11	2	11	8	9	4	16	33	12	3
Tb07.30D13.110	759	384	251	129	120	499	132	240	454	39	29	79	8	95	86	41	36	127	397	111	56
Tb07.30D13.130	639	530	271	201	172	193	83	94	264	42	15	107	11	117	110	61	24	129	468	124	99
Tb07.30D13.160	759	340	227	110	97	442	108	221	385	31	27	65	7	77	73	36	33	99	320	97	50
Tb07.30D13.180	744	777	419	292	248	242	111	120	352	56	25	145	15	147	147	76	52	188	656	179	141
Tb07.30D13.60	759	434	294	140	134	555	160	283	530	43	33	96	11	105	97	49	39	145	430	132	65
Tb07.30D13.80	777	691	388	255	242	239	116	117	362	46	18	116	12	140	135	67	36	172	597	165	107
Tb08.27P2.110	999	79	100	116	99	242	128	142	345	6	10	3	5	12	11	42	60	34	111	50	47
Tb08.27P2.120	1291	5	0	3	5	9	2	5	2	3	3	9	4	1	0	1	7	0	0	0	0
Tb08.27P2.140	1596	2	0	1	2	4	1	2	1	1	2	0	0	0	1	0	0	0	1	0	0
Tb08.27P2.150	1527	1	0	0	0	1	0	2	2	0	1	0	0	0	0	0	1	0	1	0	0
Tb08.27P2.160	1095	0	0	0	1	2	0	0	0	0	0	0	0	0	0	0	0	0	0	0	0
Tb08.27P2.165	1541	0	0	0	0	1	0	0	0	0	0	0	0	0	0	0	0	0	0	0	0
Tb08.27P2.190	1399	0	0	0	0	0	0	0	0	0	0	0	0	0	0	0	0	0	0	0	0
Tb08.27P2.210	1422	4	2	7	4	5	3	2	4	0	0	1	1	0	1	1	1	0	0	0	0
Tb08.27P2.220	1515	0	0	0	0	0	0	0	0	0	0	0	0	0	0	0	0	0	0	0	0
Tb08.27P2.230	1543	0	0	0	1	1	0	0	1	0	0	0	0	0	0	0	0	0	0	0	0
Tb08.27P2.240	1596	0	0	0	0	0	0	0	0	0	0	0	0	0	0	0	0	0	0	0	0
Tb08.27P2.250	1102	0	0	0	0	0	0	0	0	0	0	0	0	0	0	0	0	0	0	0	0
Tb08.27P2.260	1530	0	0	0	0	0	0	0	0	0	0	0	0	0	0	0	0	0	0	0	0
Tb08.27P2.270	1400	6	3	5	1	18	4	8	7	0	6	0	1	0	0	0	3	0	1	1	0
Tb08.27P2.290	1554	2	0	0	4	2	1	4	1	0	0	0	1	0	1	0	0	0	1	0	0
Tb08.27P2.310	1552	3	1	5	4	11	4	2	8	1	0	0	2	0	1	1	2	0	2	0	0
Tb08.27P2.330	1004	1	0	0	1	1	1	1	0	0	0	0	0	0	0	0	0	0	0	0	0
Tb08.27P2.340	1550	24	17	18	21	46	7	40	20	1	11	1	11	0	0	4	12	0	4	1	0
Tb08.27P2.370	1449	5	5	5	3	20	3	7	5	0	2	0	0	0	0	0	3	0	3	1	0
Tb08.27P2.380	1553	3	2	5	4	10	4	3	4	1	0	0	2	0	0	1	2	0	1	1	0
Tb08.27P2.390	1492	0	0	0	0	0	1	0	1	0	0	0	0	0	0	0	0	0	0	0	0
Tb08.27P2.400	1075	53	66	14	22	180	123	168	127	4	2	2	0	12	39	40	57	2	82	12	9
Tb08.27P2.410	755	2	0	0	0	1	0	0	3	0	0	0	0	0	0	1	0	0	0	0	0
Tb08.27P2.435	282	0	0	0	0	6	2	1	1	0	0	0	0	0	0	0	1	0	0	0	0
Tb08.27P2.460	1470	0	0	0	0	7	0	1	1	0	1	0	0	0	0	0	0	0	0	0	0
Tb08.27P2.480	1610	1	3	3	1	4	1	2	2	1	0	0	0	0	0	1	1	1	0	1	0
Tb08.27P2.490	1590	3	0	0	2	4	1	3	2	0	0	0	0	0	1	0	1	0	0	0	0
Tb08.27P2.50	456	26	18	14	39	54	12	34	51	3	7	7	5	3	2	3	10	1	6	7	0
Tb08.27P2.510	1467	0	0	0	0	0	0	0	0	0	0	0	0	0	0	0	0	0	0	0	0
Tb08.27P2.520	1028	0	0	0	0	0	0	0	0	0	0	0	0	0	0	0	0	0	0	0	0
Tb08.27P2.530	1473	3	0	4	2	9	1	2	4	0	2	0	1	0	0	1	0	0	1	2	0
Tb08.27P2.550	1580	2	1	0	3	9	0	4	0	0	0	0	2	0	0	0	1	0	0	0	0
Tb08.27P2.555	1164	1	1	0	0	2	0	1	0	0	0	0	0	0	0	0	0	0	0	0	0
Tb08.27P2.565	411	0	1	0	0	5	1	0	1	0	0	0	0	0	0	0	0	0	0	0	0
Tb08.27P2.580	1711	3	2	4	1	6	3	6	3	0	0	0	0	0	0	0	1	0	1	0	0
Tb08.27P2.60	528	28	69	10	17	95	31	52	56	4	1	1	2	7	5	7	8	7	37	4	3
Tb08.27P2.610	1533	2	6	1	2	6	5	2	3	0	3	0	2	0	1	0	0	0	2	1	0
Tb08.27P2.620	1588	5	0	4	6	6	1	4	0	0	0	0	1	0	0	0	0	0	1	0	0
Tb08.27P2.630	1520	1	1	0	3	8	0	5	1	0	0	0	0	0	0	0	1	0	0	0	0
Tb08.27P2.640	1554	7	3	5	7	13	1	10	18	2	1	0	4	0	3	2	4	0	1	0	0
Tb08.27P2.650	1533	3	2	8	3	12	2	8	5	2	0	0	2	0	0	1	2	0	1	0	0
Tb08.27P2.660	1589	1	2	4	0	2	2	2	1	0	0	0	0	0	0	0	0	0	0	0	0
Tb08.27P2.670	1626	24	4	8	5	13	5	6	22	1	1	2	4	0	0	0	3	0	1	0	0
Tb08.27P2.680	1533	8	4	8	10	25	5	11	12	0	0	0	6	0	0	0	4	0	0	0	0
Tb08.27P2.690	863	2	1	2	4	8	0	4	1	0	2	0	0	0	0	0	2	0	1	0	0
Tb08.27P2.70	816	22	27	7	10	46	19	9	16	1	1	1	1	1	3	2	0	0	25	1	2
Tb08.27P2.710	1459	2	0	5	3	1	0	8	3	0	1	0	2	0	0	1	0	0	0	0	0
Tb08.27P2.720	1465	4	1	2	2	15	0	6	3	1	4	0	4	0	0	1	5	0	2	0	0
Tb08.27P2.80	945	27	67	6	14	83	29	50	54	2	0	0	2	9	4	7	6	6	37	3	3
Tb08.27P2.90	846	24	23	16	18	162	90	103	158	6	11	0	3	7	13	20	25	14	45	7	8
Tb09_rRNA_1	980	1213943	1370244	1643300	1592344	4421467	4633884	4283680	3084989	4809872	4710495	3582120	5181272	3648237	3834996	4040127	3632187	4326031	2438050	3930016	3189765
Tb09_rRNA_2	215	1170495	430510	891593	389976	241962	188418	899372	942480	524223	311802	4456694	600254	3377836	1093171	927769	302067	1183783	2549489	889356	4972607
Tb09_rRNA_3	1319	1329364	1088024	1478132	1242781	4096651	3933088	4392607	4780262	3235250	3732421	3098600	3227813	3086041	2552388	2897646	3685040	2786799	2126420	2392794	2049128
Tb09_rRNA_4	183	1584758	105144	567113	103440	7724	5099	28437	26937	159167	188738	666649	244040	408440	273097	357100	64480	176791	592174	505318	290537
Tb09_rRNA_5	78	6	12	1	7	29	15	4	4	62	75	2	4	9	4	1	8	0	35	3	4
Tb09_rRNA_6	136	16907	2044	7658	2423	196	96	568	483	5356	6145	13768	11000	10711	8620	16064	1373	1543	10173	9464	5633
Tb09_SLRNA_0001	46	4	6	4	3	17	8	15	12	6	4	0	0	1	0	0	0	2	5	0	0
Tb09_SLRNA_0002	128	0	0	0	0	0	1	2	0	0	0	0	0	0	0	0	0	0	0	0	0
Tb09_SLRNA_0003	134	1	2	0	8	16	4	23	24	20	11	11	18	0	5	0	3	1	13	2	0
Tb09_SLRNA_0004	134	0	2	0	8	16	4	23	24	19	11	11	18	0	4	0	3	1	26	2	1
Tb09_SLRNA_0005	134	0	1	0	0	2	2	1	2	1	1	0	0	0	0	0	0	0	0	0	0
Tb09_SLRNA_0006	134	0	0	0	1	0	0	0	0	0	0	0	0	0	0	0	0	0	0	0	0
Tb09_SLRNA_0007	134	0	2	0	8	16	4	23	24	19	11	11	18	0	4	0	3	1	25	2	1
Tb09_SLRNA_0008	134	0	2	0	8	16	4	23	24	19	11	11	18	0	4	0	3	1	26	2	1
Tb09_SLRNA_0009	134	0	0	0	0	0	0	0	0	0	0	0	0	0	0	0	0	0	13	0	1
Tb09_SLRNA_0010	134	0	1	0	0	2	2	1	2	1	1	0	0	0	0	0	0	0	0	0	0
Tb09_SLRNA_0011	134	0	0	0	0	0	0	0	0	0	0	0	0	0	0	0	0	0	13	0	1
Tb09_SLRNA_0012	134	0	1	0	1	2	2	1	2	1	1	0	0	0	0	0	0	1	0	0	0
Tb09_SLRNA_0013	134	0	0	0	2	11	3	6	6	8	6	2	4	0	1	1	2	0	3	0	0
Tb09_SLRNA_0014	134	0	0	0	0	0	0	0	0	0	0	0	0	0	0	0	0	0	13	0	1
Tb09_SLRNA_0015	134	0	0	0	1	0	0	0	0	0	0	0	0	0	0	0	0	0	0	0	0
Tb09_SLRNA_0016	134	0	0	0	0	0	0	0	0	0	0	0	0	0	0	0	0	0	13	0	1
Tb09_SLRNA_0017	134	0	0	0	0	0	0	0	0	0	0	0	0	0	0	0	0	0	13	0	1
Tb09_SLRNA_0018	134	0	1	0	0	2	2	1	2	1	1	0	0	0	0	0	0	0	0	0	0
Tb09_SLRNA_0019	134	0	0	0	0	0	0	0	1	0	0	0	0	0	0	0	0	0	13	0	1
Tb09_SLRNA_0020	134	0	0	0	0	0	0	0	0	0	0	0	0	0	0	0	0	0	13	0	1
Tb09_SLRNA_0021	134	0	1	0	0	2	2	1	2	1	1	0	0	0	0	0	0	0	0	0	0
Tb09_SLRNA_0022	134	0	0	0	2	11	3	6	6	8	6	2	4	0	1	1	2	0	16	0	1
Tb09_SLRNA_0023	134	0	0	0	0	0	0	0	0	0	0	0	0	0	0	0	0	0	13	0	1
Tb09_SLRNA_0024	134	0	0	0	0	0	0	0	0	0	0	0	0	0	0	0	0	0	13	0	1
Tb09_SLRNA_0025	134	0	0	0	0	0	0	0	0	0	0	0	0	0	0	0	0	0	13	0	1
Tb09_SLRNA_0026	134	0	0	0	1	0	0	0	0	0	0	0	0	0	0	0	0	0	0	0	0
Tb09_SLRNA_0027	134	0	1	0	0	2	2	4	4	1	1	0	0	0	0	0	0	0	0	0	0
Tb09_SLRNA_0028	55	4	4	1	0	10	3	6	4	1	2	0	1	1	0	0	2	1	1	0	0
Tb09_snoRNA_0001	97	32	4	38	5	48	20	69	91	62	57	561	142	170	134	116	61	50	188	102	123
Tb09_snoRNA_0002	71	24	2	19	2	60	15	67	116	47	16	362	41	60	95	87	36	25	115	52	80
Tb09_snoRNA_0003	68	124	12	77	14	126	36	92	199	292	178	1579	367	384	516	298	175	135	573	259	202
Tb09_snoRNA_0004	67	124	10	100	14	98	41	113	210	251	165	1486	366	303	430	304	186	143	496	300	213
Tb09_snoRNA_0005	97	84	15	86	15	119	40	145	225	188	175	1575	330	404	345	366	199	164	507	377	382
Tb09_snoRNA_0006	71	63	7	61	9	110	27	110	200	127	86	967	137	213	230	251	114	85	288	202	249
Tb09_snoRNA_0007	68	111	11	63	12	121	31	81	183	259	150	1406	315	343	464	259	155	119	528	223	169
Tb09_snoRNA_0008	56	54	4	32	5	45	14	39	90	123	81	669	158	121	210	112	72	51	207	116	77
Tb09_snoRNA_0009	87	28	24	20	27	235	51	281	227	85	111	455	115	84	65	60	68	33	131	54	58
Tb09_snoRNA_0010	101	3053	198	2180	195	232	114	263	365	868	693	2642	822	1200	1569	1105	291	631	2700	2185	1532
Tb09_snoRNA_0011	91	60	53	35	33	120	59	72	114	414	250	843	251	111	120	84	94	71	201	71	41
Tb09_snoRNA_0012	73	73	24	53	27	101	37	47	70	274	206	612	197	96	75	70	74	56	121	51	23
Tb09_snoRNA_0013	75	10	10	6	7	12	10	21	19	62	49	238	49	14	6	18	17	9	27	19	4
Tb09_snoRNA_0014	79	18	1	12	15	34	13	42	73	52	28	270	30	28	24	12	12	14	53	11	8
Tb09_snoRNA_0015	96	30	15	11	11	88	29	58	107	63	43	301	37	39	30	18	12	18	56	14	22
Tb09_snoRNA_0016	75	22	22	13	11	31	11	26	19	54	46	265	24	20	25	24	17	14	66	15	9
Tb09_snoRNA_0017	97	144	90	127	114	283	72	416	447	629	544	2660	433	278	335	212	151	119	620	232	83
Tb09_snoRNA_0018	87	33	36	26	37	273	72	345	295	171	163	758	189	124	93	84	94	49	216	70	82
Tb09_snoRNA_0019	101	3053	198	2180	195	232	114	263	365	868	693	2642	822	1200	1569	1105	291	631	2700	2185	1532
Tb09_snoRNA_0020	91	60	53	35	33	120	59	72	114	414	250	843	251	111	120	84	94	71	201	71	41
Tb09_snoRNA_0021	73	73	24	53	27	101	37	47	70	274	206	612	197	96	75	70	74	56	121	51	23
Tb09_snoRNA_0022	75	10	10	6	7	12	10	21	19	62	49	238	49	14	6	18	17	9	27	19	4
Tb09_snoRNA_0023	79	18	1	12	15	34	13	42	73	52	28	270	30	28	24	12	12	14	53	11	8
Tb09_snoRNA_0024	96	30	15	11	11	88	29	58	107	63	43	301	37	39	30	18	12	18	56	14	22
Tb09_snoRNA_0025	76	65	81	38	60	145	55	211	221	431	291	1703	239	143	182	139	106	112	371	158	61
Tb09_snoRNA_0026	97	142	85	125	110	243	65	351	378	565	475	2339	372	245	297	189	122	100	494	186	64
Tb09_snoRNA_0027	87	33	36	26	37	276	71	348	301	182	165	779	199	127	94	87	98	49	220	70	82
Tb09_snoRNA_0028	101	3041	192	2173	187	225	113	236	338	837	680	2529	797	1170	1555	1085	279	622	2680	2176	1508
Tb09_snoRNA_0029	91	60	53	35	33	120	59	72	114	414	250	843	251	111	120	84	94	71	201	71	41
Tb09_snoRNA_0030	73	73	24	53	27	101	37	47	70	274	206	612	197	96	75	70	74	56	121	51	23
Tb09_snoRNA_0031	75	10	10	6	7	12	10	21	19	62	49	238	49	14	6	18	17	9	27	19	4
Tb09_snoRNA_0032	79	18	1	12	15	34	13	42	73	52	28	270	30	28	24	12	12	14	53	11	8
Tb09_snoRNA_0033	96	30	15	11	11	88	29	58	107	63	43	301	37	39	30	18	12	18	56	14	22
Tb09_snoRNA_0034	76	47	56	28	49	112	37	168	165	282	224	1266	186	113	152	99	84	83	261	120	46
Tb09_snoRNA_0035	97	144	91	127	115	282	73	417	454	631	544	2664	431	280	335	209	153	119	624	233	82
Tb09_snoRNA_0036	87	32	35	26	33	263	64	322	267	143	145	668	164	104	86	79	84	46	189	65	77
Tb09_snoRNA_0037	101	3041	192	2173	187	225	113	236	338	837	680	2529	797	1170	1555	1085	279	622	2680	2176	1508
Tb09_snoRNA_0038	91	60	53	35	33	120	59	72	114	414	250	843	251	111	120	84	94	71	201	71	41
Tb09_snoRNA_0039	73	73	24	53	27	101	37	47	70	274	206	612	197	96	75	70	74	56	121	51	23
Tb09_snoRNA_0040	75	6	4	2	4	9	6	14	8	20	24	83	15	5	1	6	6	2	6	4	2
Tb09_snoRNA_0041	79	18	1	12	15	34	13	42	73	52	28	270	30	28	24	12	12	14	53	11	8
Tb09_snoRNA_0042	96	30	15	11	11	88	29	58	107	63	43	301	37	39	30	18	12	18	56	14	22
Tb09_snoRNA_0043	76	65	81	38	60	145	55	211	221	431	291	1703	239	143	182	139	106	112	371	158	61
Tb09_snoRNA_0044	97	144	90	127	114	283	72	416	447	629	544	2660	433	278	335	212	151	119	620	232	83
Tb09_snoRNA_0045	87	33	36	26	37	273	72	345	295	171	163	758	189	124	93	84	94	49	216	70	82
Tb09_snoRNA_0046	101	3041	192	2173	187	225	113	236	338	837	680	2529	797	1170	1555	1085	279	622	2680	2176	1508
Tb09_snoRNA_0047	91	60	53	35	33	120	59	72	114	414	250	843	251	111	120	84	94	71	201	71	41
Tb09_snoRNA_0048	73	73	24	53	27	101	37	47	70	274	206	612	197	96	75	70	74	56	121	51	23
Tb09_snoRNA_0049	75	10	10	6	7	12	10	21	19	62	49	238	49	14	6	18	17	9	27	19	4
Tb09_snoRNA_0050	79	18	1	12	15	34	13	42	73	52	28	270	30	28	24	12	12	14	53	11	8
Tb09_snoRNA_0051	96	51	17	21	12	99	40	87	148	94	57	450	66	54	40	22	25	30	99	28	34
Tb09_snoRNA_0052	76	65	81	38	60	145	55	211	221	431	291	1703	239	143	182	139	106	112	371	158	61
Tb09_snoRNA_0053	97	144	86	125	111	252	67	381	403	604	504	2502	403	258	310	195	145	117	581	225	78
Tb09_snoRNA_0054	87	33	36	26	37	273	72	349	293	174	164	764	195	124	95	84	94	50	215	70	80
Tb09_snoRNA_0055	101	3053	198	2180	195	232	114	263	365	868	693	2642	822	1200	1569	1105	291	631	2700	2185	1532
Tb09_snoRNA_0056	91	60	53	35	33	120	59	72	114	414	250	843	251	111	120	84	94	71	201	71	41
Tb09_snoRNA_0057	73	73	24	53	27	101	37	47	70	274	206	612	197	96	75	70	74	56	121	51	23
Tb09_snoRNA_0058	75	4	9	4	3	5	6	11	14	48	28	180	37	9	6	13	12	7	24	15	2
Tb09_snoRNA_0059	79	18	1	12	15	34	13	42	73	52	28	270	30	28	24	12	12	14	53	11	8
Tb09_snoRNA_0060	96	30	15	11	11	88	29	58	107	63	43	301	37	39	30	18	12	18	56	14	22
Tb09_snoRNA_0061	76	65	81	38	60	145	55	211	221	431	291	1703	239	143	182	139	106	112	371	158	61
Tb09_snoRNA_0062	97	142	85	125	109	241	65	349	374	565	473	2337	372	245	297	190	137	109	518	206	71
Tb09_snoRNA_0063	87	33	36	26	36	271	71	344	293	171	162	755	187	124	93	84	93	49	211	69	80
Tb09_snoRNA_0064	101	3053	198	2180	195	232	114	263	365	868	693	2642	822	1200	1569	1105	291	631	2700	2185	1532
Tb09_snoRNA_0065	91	60	53	35	33	120	59	72	114	414	250	843	251	111	120	84	94	71	201	71	41
Tb09_snoRNA_0066	73	73	24	53	27	101	37	47	70	274	206	612	197	96	75	70	74	56	121	51	23
Tb09_snoRNA_0067	75	10	10	6	7	12	10	21	19	62	49	238	49	14	6	18	17	9	27	19	4
Tb09_snoRNA_0068	79	18	1	12	15	34	13	42	73	52	28	270	30	28	24	12	12	14	53	11	8
Tb09_snoRNA_0069	96	30	15	11	11	88	29	58	107	63	43	301	37	39	30	18	12	18	56	14	22
Tb09_snoRNA_0070	76	52	64	32	51	115	38	174	169	310	242	1368	197	120	161	106	91	91	291	127	51
Tb09_snoRNA_0071	97	144	90	127	114	283	72	416	447	629	544	2660	433	278	335	212	151	119	620	232	83
Tb09_snoRNA_0072	87	33	36	26	37	273	72	345	295	171	163	758	189	124	93	84	94	49	216	70	82
Tb09_snoRNA_0073	101	3053	198	2180	195	232	114	263	365	868	693	2642	822	1200	1569	1105	291	631	2700	2185	1532
Tb09_snoRNA_0074	91	62	56	37	36	126	63	86	131	452	318	915	273	119	128	93	103	76	230	81	45
Tb09_snoRNA_0075	73	73	24	53	27	101	37	47	70	274	206	612	197	96	75	70	74	56	121	51	23
Tb09_snoRNA_0076	69	6	4	4	4	11	7	15	11	24	26	92	18	8	2	8	7	2	5	5	3
Tb09_snoRNA_0077	100	16	10	5	2	46	9	14	25	7	6	48	4	11	11	1	0	5	44	7	3
Tb09_snoRNA_0078	90	6	8	3	7	19	7	10	16	5	1	18	0	3	11	4	2	11	24	12	5
Tb09_snoRNA_0079	81	63	28	35	35	66	19	82	137	107	67	545	45	46	72	47	17	15	174	35	16
Tb09_snoRNA_0080	87	73	53	38	46	121	34	146	232	112	86	712	56	47	75	49	29	20	230	49	21
Tb09_snoRNA_0081	75	45	61	29	54	129	46	153	187	56	37	404	38	32	53	32	25	18	143	36	17
Tb09_snoRNA_0082	125	26	44	12	41	93	53	104	142	46	25	253	31	27	44	23	28	18	90	28	17
Tb09_snoRNA_0083	67	10	24	9	17	47	32	57	89	6	4	80	6	6	7	11	6	3	33	6	5
Tb09_snoRNA_0084	81	59	26	31	30	62	19	77	129	95	58	484	40	41	68	43	14	14	151	27	14
Tb09_snoRNA_0085	87	40	24	19	20	24	14	51	74	47	34	283	26	26	49	18	14	11	128	24	7
Tb09_snoRNA_0086	75	45	61	29	54	129	46	153	187	56	37	404	38	32	53	32	25	18	143	36	17
Tb09_snoRNA_0087	125	26	44	12	41	93	53	104	142	46	25	253	31	27	44	23	28	18	90	28	17
Tb09_snoRNA_0088	67	10	21	8	15	33	32	48	79	5	3	70	6	6	7	9	6	3	26	6	3
Tb09_snoRNA_0089	81	40	13	16	16	11	6	24	40	53	22	254	17	20	41	20	9	8	79	10	2
Tb09_snoRNA_0090	87	45	32	22	25	39	20	63	99	58	42	373	32	31	55	23	18	12	148	30	11
Tb09_snoRNA_0091	75	45	61	29	54	129	46	153	187	56	37	404	38	32	53	32	25	18	143	36	17
Tb09_snoRNA_0092	125	26	44	12	41	93	53	104	142	46	25	253	31	27	44	23	28	18	90	28	17
Tb09_snoRNA_0093	67	6	3	3	1	7	7	10	14	1	2	33	5	6	4	4	4	2	7	0	0
Tb09_snoRNA_0094	75	104	63	36	28	147	50	53	96	528	374	1987	276	150	135	55	44	63	194	44	47
Tb09_snoRNA_0095	73	72	46	20	16	114	35	36	72	124	116	455	48	87	66	30	15	50	95	30	29
Tb09_snoRNA_0096	109	140	60	64	32	117	27	41	89	117	29	241	50	91	105	51	25	56	186	40	45
Tb09_snoRNA_0097	88	10	7	3	7	12	2	5	7	7	5	17	2	14	9	1	4	4	30	4	3
Tb09_snoRNA_0098	56	195	120	134	125	307	121	409	755	48	26	160	9	65	49	41	25	194	692	254	106
Tb09_snoRNA_0099	66	48	33	14	25	83	34	31	53	386	324	1434	162	72	97	43	23	42	168	37	15
Tb09_snoRNA_0100	75	146	83	45	42	181	72	74	123	744	509	2770	387	189	187	78	58	85	278	71	57
Tb09_snoRNA_0101	71	72	30	22	13	113	34	31	62	124	120	473	56	82	51	27	18	45	84	29	26
Tb09_snoRNA_0102	109	92	33	54	27	96	22	34	72	104	21	208	50	72	79	42	21	46	142	32	38
Tb09_snoRNA_0103	88	88	56	32	41	134	37	37	106	46	23	124	20	46	53	22	20	37	148	43	31
Tb09_snoRNA_0104	56	176	117	116	113	310	120	399	748	56	29	147	7	64	46	42	23	178	749	280	106
Tb09_snoRNA_0105	66	51	34	14	28	88	37	35	55	392	326	1458	163	72	104	43	24	43	173	39	17
Tb09_snoRNA_0106	75	146	83	45	42	181	72	74	123	744	509	2770	387	189	187	78	58	85	278	71	57
Tb09_snoRNA_0107	73	72	46	20	16	114	35	36	72	124	116	455	48	87	66	30	15	50	95	30	29
Tb09_snoRNA_0108	109	140	60	64	32	117	27	41	89	117	29	241	50	91	105	51	25	56	186	40	45
Tb09_snoRNA_0109	88	10	7	3	7	12	2	5	7	7	5	17	2	14	9	1	4	4	30	4	3
Tb09_snoRNA_0110	56	176	117	116	113	310	120	399	748	56	29	147	7	64	46	42	23	178	749	280	106
Tb09_snoRNA_0111	66	16	10	2	7	27	12	10	15	190	97	385	50	21	54	10	5	13	82	8	7
Tb09_snoRNA_0112	75	32	24	10	9	37	16	12	19	65	82	371	63	33	25	8	7	8	25	4	11
Tb09_snoRNA_0113	71	44	10	15	3	44	13	14	30	46	28	158	31	37	28	16	13	18	36	10	17
Tb09_snoRNA_0114	109	139	49	65	32	118	24	40	85	123	28	238	56	86	102	48	23	57	181	39	42
Tb09_snoRNA_0115	88	47	21	14	10	78	10	8	37	12	6	37	5	8	18	7	2	13	32	10	10
Tb09_snoRNA_0116	56	176	117	116	113	310	120	399	748	56	29	147	7	64	46	42	23	178	749	280	106
Tb09_snoRNA_0117	66	17	10	2	7	27	12	10	15	190	97	384	51	21	54	10	5	13	82	8	7
Tb09_snoRNA_0118	75	66	37	20	19	92	25	26	50	346	199	1085	179	92	76	27	28	28	107	23	27
Tb09_snoRNA_0119	71	67	28	22	13	104	34	30	62	112	118	443	56	79	46	26	17	37	70	24	23
Tb09_snoRNA_0120	109	139	49	65	32	118	24	40	85	123	28	238	56	86	102	48	23	57	181	39	42
Tb09_snoRNA_0121	88	47	21	13	10	78	10	8	36	12	5	33	5	7	16	7	2	13	32	10	10
Tb09_snoRNA_0122	56	176	117	116	113	310	120	399	748	56	29	147	7	64	46	42	23	178	749	280	106
Tb09_snoRNA_0123	66	16	10	2	7	27	12	10	15	190	97	385	50	21	54	10	5	13	82	8	7
Tb09_snoRNA_0124	75	32	24	10	9	37	16	12	19	65	82	371	63	33	25	8	7	8	25	4	11
Tb09_snoRNA_0125	71	35	22	12	12	78	24	20	37	80	100	321	35	52	28	15	6	24	38	16	7
Tb09_snoRNA_0126	109	137	48	65	32	116	23	39	82	121	27	229	55	83	102	48	23	54	175	37	39
Tb09_snoRNA_0127	88	1	0	0	0	0	0	0	0	0	0	0	0	0	0	0	0	0	0	0	0
Tb09_tRNA_Gly_1	71	1	0	0	0	1	0	2	2	0	0	0	0	0	0	0	0	0	0	0	0
Tb09.142.0010	1514	13	9	15	14	19	4	12	15	1	6	0	5	0	1	4	0	0	1	2	0
Tb09.142.0020	1439	10	2	8	5	12	2	3	6	0	4	0	2	0	1	0	3	0	2	1	0
Tb09.142.0030	1131	0	1	3	4	15	3	3	6	0	0	0	1	0	0	0	1	0	0	0	0
Tb09.142.0040	1510	6	5	4	7	15	5	8	9	1	4	0	3	1	1	1	5	0	2	0	0
Tb09.142.0050	1625	7	4	8	3	22	3	10	17	0	0	0	5	0	0	2	4	0	3	2	1
Tb09.142.0060	1447	3	1	4	2	5	2	1	7	0	1	0	1	0	0	0	2	1	2	1	0
Tb09.142.0070	1530	4	5	12	12	21	3	11	5	0	1	0	4	0	0	0	4	0	3	0	1
Tb09.142.0090	1423	3	0	2	4	11	1	6	2	0	2	0	0	0	0	4	0	0	2	1	0
Tb09.142.0100	1512	5	1	14	0	21	2	7	7	1	2	0	5	0	0	0	1	0	3	1	0
Tb09.142.0110	941	0	1	0	2	6	1	1	2	0	0	0	0	0	0	0	0	0	0	0	0
Tb09.142.0120	1572	1	0	2	3	4	1	4	3	0	0	0	1	0	1	0	3	0	2	0	0
Tb09.142.0130	1448	14	6	14	7	23	8	19	12	0	3	0	7	0	1	0	2	1	2	2	0
Tb09.142.0135	117	2	0	0	2	5	2	1	3	0	0	0	0	0	0	0	0	0	0	0	0
Tb09.142.0140	402	1	0	0	4	0	0	3	1	0	0	0	2	0	0	0	2	0	0	0	0
Tb09.142.0160	1570	0	0	0	0	0	0	0	0	0	0	0	0	0	0	0	0	0	0	0	0
Tb09.142.0170	1700	1	4	1	3	10	0	2	4	0	1	0	0	0	0	0	1	0	1	0	0
Tb09.142.0180	1653	10	0	2	0	10	2	2	5	0	2	0	0	0	0	1	3	0	1	0	0
Tb09.142.0190	270	0	0	0	0	0	0	0	0	0	0	0	0	0	0	0	0	0	0	0	0
Tb09.142.0200	1439	2	0	2	1	0	1	0	1	0	0	0	0	0	0	2	0	0	0	0	0
Tb09.142.0210	546	0	1	0	1	1	0	0	0	0	0	0	1	0	0	0	0	0	0	0	0
Tb09.142.0220	1005	0	0	1	0	4	0	1	1	0	0	0	0	0	0	0	0	0	0	0	0
Tb09.142.0230	1521	2	1	2	3	2	1	1	0	0	0	0	0	0	0	0	0	0	0	0	0
Tb09.142.0240	1599	0	0	3	0	1	0	0	1	0	0	0	0	0	1	0	0	0	0	0	0
Tb09.142.0245	370	0	0	0	0	1	0	3	0	0	0	0	0	0	0	0	1	0	0	0	0
Tb09.142.0250	1576	0	0	5	0	0	0	0	1	0	0	0	0	0	0	0	0	0	0	0	0
Tb09.142.0260	1008	0	0	0	0	0	0	0	0	0	0	0	0	0	0	0	0	0	0	0	0
Tb09.142.0270	848	0	0	0	0	0	0	0	0	0	0	0	0	0	0	0	0	0	0	0	0
Tb09.142.0280	1554	0	0	0	0	0	0	0	0	0	0	0	0	0	0	0	0	0	0	0	0
Tb09.142.0290	1569	0	0	1	3	3	0	3	2	1	1	0	1	0	0	0	1	0	1	0	0
Tb09.142.0300	672	63	77	23	35	173	68	124	113	45	41	50	17	24	26	14	4	28	60	27	15
Tb09.142.0310	984	0	0	0	0	0	0	0	0	0	0	0	0	0	0	0	0	0	1	0	0
Tb09.142.0320	342	44	41	22	28	49	18	37	96	10	4	11	5	6	3	1	6	18	30	17	5
Tb09.142.0330	858	40	25	16	9	25	13	14	25	1	1	5	0	4	11	5	5	9	14	3	3
Tb09.142.0340	1029	12	3	6	9	11	4	4	6	0	0	0	2	1	2	2	8	0	8	1	0
Tb09.142.0350	561	11	17	3	9	1	0	3	5	0	0	1	0	1	0	0	0	0	0	0	0
Tb09.142.0360	642	31	23	15	8	2	4	2	7	0	0	0	0	1	1	1	4	0	1	0	0
Tb09.142.0370	454	61	58	21	25	13	10	18	31	0	1	16	7	9	6	12	19	10	18	7	5
Tb09.142.0380	354	88	69	43	25	12	9	5	19	0	1	1	3	9	10	6	21	4	9	3	3
Tb09.142.0390	505	276	532	219	382	464	323	569	1009	19	11	21	11	16	21	22	26	37	224	58	17
Tb09.142.0400	186	9	7	11	5	2	6	4	10	1	0	1	0	1	1	4	1	1	1	3	2
Tb09.142.0410	351	44	25	27	25	60	27	69	100	10	7	29	9	7	14	20	12	9	15	21	8
Tb09.142.0420	174	9	25	19	15	11	6	22	26	12	7	25	3	2	4	3	5	1	22	9	5
Tb09.142.0430	426	12	18	3	12	11	8	5	5	1	0	0	0	1	3	1	0	1	6	0	0
Tb09.142.0440	348	45	32	11	25	13	5	5	11	0	4	3	1	3	3	1	3	1	8	4	0
Tb09.142.0450	1038	2	1	2	0	8	2	4	5	0	0	1	0	0	0	0	0	0	3	0	0
Tb09.142.0460	1584	26	14	21	11	15	3	13	30	1	0	2	1	0	3	3	3	1	7	1	1
Tb09.142.0470	1615	15	7	9	11	10	6	12	24	0	3	6	2	0	0	3	3	0	3	0	0
Tb09.142.0480	1551	16	2	8	1	8	1	7	15	1	0	0	1	1	0	1	1	1	0	1	0
Tb09.142.0490	1482	0	0	0	0	0	0	0	0	0	0	0	0	0	0	0	0	0	0	0	0
Tb09.142.0500	1472	1	1	1	2	4	1	2	3	1	0	0	0	0	0	0	4	0	0	0	0
Tb09.160.0010	1461	7	5	4	4	13	2	10	11	0	6	0	0	0	0	1	1	0	2	1	1
Tb09.160.0030	1547	14	7	7	3	12	4	9	6	2	4	0	2	2	1	1	4	2	8	8	4
Tb09.160.0040	1057	12	3	8	10	12	2	11	3	1	1	0	2	0	1	1	6	7	31	9	7
Tb09.160.0045	90	0	0	0	0	1	0	0	1	0	0	0	0	0	0	0	0	0	0	0	0
Tb09.160.0050	324	0	0	0	1	1	0	0	0	0	0	0	0	0	0	0	0	0	0	0	0
Tb09.160.0060	1447	6	1	2	1	4	1	5	0	0	3	0	4	0	0	0	1	0	0	0	0
Tb09.160.0070	1560	4	0	2	2	9	4	7	3	0	0	0	1	0	1	1	1	0	0	0	0
Tb09.160.0080	1400	2	3	1	0	9	0	2	3	1	0	0	0	0	0	0	1	0	0	0	0
Tb09.160.0090	540	0	0	0	0	3	0	1	3	0	0	0	0	0	0	0	0	0	0	0	0
Tb09.160.0100	1541	3	2	3	3	4	1	2	6	1	0	0	1	1	0	2	4	0	0	0	0
Tb09.160.0110	1506	1	1	2	3	10	2	4	4	1	0	0	4	1	0	1	5	0	2	0	0
Tb09.160.0120	1536	8	2	3	1	14	2	5	7	0	3	0	0	0	0	1	3	0	0	1	1
Tb09.160.0130	1113	1	0	1	3	6	2	3	6	0	2	0	0	0	0	0	0	0	0	1	0
Tb09.160.0150	1458	8	4	5	6	14	5	11	11	3	1	0	1	1	0	0	4	0	1	0	0
Tb09.160.0160	1461	2	0	0	0	6	1	3	4	0	3	0	1	0	1	0	2	0	2	0	0
Tb09.160.0170	1353	0	0	0	3	0	0	2	1	0	0	0	0	0	0	0	0	0	0	0	0
Tb09.160.0180	1492	0	0	0	0	0	1	0	1	0	0	0	0	0	0	0	1	0	0	0	0
Tb09.160.0185	237	0	0	0	0	0	0	1	0	0	0	0	0	0	0	0	0	0	0	0	0
Tb09.160.0200	1538	0	0	0	0	3	0	0	1	0	0	0	0	0	0	0	0	0	0	0	0
Tb09.160.0220	1286	11	6	10	15	20	10	6	3	0	0	0	3	0	0	2	3	0	2	3	0
Tb09.160.0230	1581	1	1	0	0	1	0	0	0	0	0	0	0	0	0	0	1	0	0	0	0
Tb09.160.0240	933	0	0	0	0	1	0	1	3	0	0	0	0	0	0	0	0	0	0	0	0
Tb09.160.0250	1566	2	0	3	1	6	1	5	5	0	1	0	1	0	0	0	0	0	1	1	0
Tb09.160.0260	1623	2	1	3	7	5	0	5	6	0	0	0	0	0	0	0	2	0	1	0	0
Tb09.160.0270	210	0	1	1	3	4	0	3	2	1	2	5	0	0	0	0	0	0	2	0	0
Tb09.160.0280	1581	14	13	2	9	7	1	7	2	0	0	0	2	0	0	0	6	0	0	0	0
Tb09.160.0290	207	7	6	2	2	7	7	5	24	1	1	4	2	5	8	1	3	3	16	10	2
Tb09.160.0300	351	10	5	2	2	15	8	6	6	4	5	1	1	1	6	4	0	4	17	3	1
Tb09.160.0310	333	8	10	4	8	15	8	17	22	6	7	24	4	1	3	2	4	2	17	14	8
Tb09.160.0320	456	41	48	16	24	88	32	92	101	7	8	14	4	3	8	9	15	7	21	14	7
Tb09.160.0330	273	26	20	12	12	27	8	22	32	3	2	3	2	6	6	4	4	3	12	3	2
Tb09.160.0340	2454	1185	904	788	557	225	116	84	560	21	9	33	10	163	131	171	386	177	334	158	66
Tb09.160.0350	1681	778	893	113	121	483	170	80	191	78	31	78	11	199	210	67	41	259	992	132	67
Tb09.160.0360	2235	359	541	76	93	1620	588	408	468	313	247	173	20	355	458	109	69	421	1951	212	116
Tb09.160.0370	1274	738	735	197	205	907	397	172	446	152	125	70	28	329	358	212	158	372	1034	182	92
Tb09.160.0380	381	266	354	135	135	971	277	599	553	327	263	400	63	416	429	186	90	296	1307	311	178
Tb09.160.0390	1371	538	683	69	58	1737	638	195	191	561	378	125	26	391	352	39	38	695	1549	86	47
Tb09.160.0400	1977	518	392	63	74	191	84	43	106	46	18	43	9	138	130	26	23	203	428	75	27
Tb09.160.0410	1615	322	383	39	59	892	308	130	152	143	145	96	8	349	309	86	69	340	1339	101	49
Tb09.160.0420	375	53	106	13	12	453	110	74	69	54	63	34	3	134	114	64	49	73	538	40	24
Tb09.160.0430	2628	2833	4210	1932	2045	2465	990	794	2845	388	253	590	147	1662	1522	1295	1031	2067	4523	2138	1054
Tb09.160.0440	489	186	127	13	17	603	228	27	32	184	183	24	14	221	237	37	20	199	628	24	17
Tb09.160.0450	1446	742	894	252	221	726	273	310	670	189	107	179	36	697	654	461	330	685	1534	565	294
Tb09.160.0460	2289	337	416	59	95	557	258	272	293	201	146	106	29	136	209	114	98	173	859	186	88
Tb09.160.0465	374	124	298	184	278	812	267	1210	1461	355	291	695	169	238	324	326	217	267	1534	677	243
Tb09.160.0470	2230	498	470	120	151	765	303	177	402	220	178	126	35	159	138	30	14	274	625	125	53
Tb09.160.0480	1341	152	116	18	45	263	98	31	38	53	35	20	4	87	85	39	26	138	530	51	24
Tb09.160.0490	1395	303	228	94	59	179	100	42	97	31	20	12	4	93	97	59	71	147	312	96	57
Tb09.160.0500	1477	290	389	39	56	456	203	54	103	35	28	42	5	72	93	33	23	88	278	41	29
Tb09.160.0510	462	32	19	2	4	69	46	15	13	23	23	3	1	12	12	6	1	18	76	2	2
Tb09.160.0520	4818	1197	531	460	239	131	55	73	100	17	9	4	3	106	78	67	199	81	192	24	10
Tb09.160.0530	790	201	380	21	68	639	207	156	149	82	52	40	6	169	133	79	48	210	1083	188	162
Tb09.160.0540	446	72	52	4	9	175	56	9	15	33	24	9	5	48	44	12	6	50	152	4	6
Tb09.160.0550	1124	129	95	19	19	176	90	39	47	56	42	15	10	70	40	6	2	89	171	13	17
Tb09.160.0560	801	146	118	18	25	262	93	27	49	72	51	41	8	95	124	20	21	153	448	26	27
Tb09.160.0570	1953	108	53	34	23	67	30	37	49	17	8	25	7	50	63	26	16	57	148	34	23
Tb09.160.0580	834	166	172	26	26	410	196	75	106	163	82	48	10	189	183	62	39	216	776	151	101
Tb09.160.0590	366	17	60	5	21	63	9	4	18	13	4	3	0	31	26	7	5	13	121	4	4
Tb09.160.0600	1831	427	425	109	104	490	163	67	213	80	42	74	13	240	251	132	71	266	782	97	57
Tb09.160.0610	1398	374	390	71	76	771	332	123	169	193	127	82	14	182	192	119	91	344	642	141	85
Tb09.160.0620	924	184	182	46	51	583	277	375	355	106	83	158	20	223	189	114	56	272	725	197	140
Tb09.160.0630	2196	353	294	45	54	398	181	77	129	147	117	53	17	132	89	25	33	168	253	40	18
Tb09.160.0640	288	13	14	3	10	25	12	7	13	7	8	6	1	3	5	3	4	17	44	8	2
Tb09.160.0650	13809	2185	1179	1508	854	333	259	164	363	71	64	112	27	206	147	114	559	675	670	204	139
Tb09.160.0660	342	90	36	7	11	77	34	11	16	16	4	8	5	26	16	4	8	37	99	10	2
Tb09.160.0670	10729	1449	775	414	369	580	392	278	426	139	143	199	39	285	193	97	284	730	1020	166	114
Tb09.160.0680	1907	361	214	87	63	300	234	75	89	69	62	24	8	97	76	28	51	212	247	37	18
Tb09.160.0690	754	174	142	46	27	484	230	214	350	159	86	102	26	130	129	24	17	181	547	57	46
Tb09.160.0700	398	3500	2556	4839	2944	5235	2230	5580	8563	1153	641	7541	962	3244	4104	3944	2422	2082	13098	5860	2964
Tb09.160.0710	737	3572	2544	4912	2912	5217	2225	5408	8417	1153	635	7421	966	3219	4077	3938	2445	2113	13028	5846	3022
Tb09.160.0720	1959	207	104	68	39	255	179	93	169	76	50	39	17	156	171	120	135	211	347	87	51
Tb09.160.0730	980	118	119	31	26	259	91	49	101	73	45	34	4	79	70	14	13	100	268	47	27
Tb09.160.0740	564	98	93	22	13	199	59	45	58	90	55	46	9	117	144	68	30	150	331	101	84
Tb09.160.0750	3375	425	348	101	133	198	107	51	162	18	7	11	4	54	64	24	26	115	236	24	23
Tb09.160.0760	1224	189	272	22	37	372	189	35	71	46	25	41	3	83	101	22	12	142	445	39	15
Tb09.160.0770	994	104	87	78	58	336	141	313	353	117	106	80	28	79	113	95	107	139	398	196	95
Tb09.160.0780	1932	214	150	13	38	286	162	37	68	53	30	31	8	151	175	67	67	180	342	27	21
Tb09.160.0790	2337	653	392	206	123	605	490	338	387	212	180	95	23	205	138	38	94	400	394	94	52
Tb09.160.0800	573	35	24	7	10	19	27	20	15	2	4	1	0	11	8	8	29	20	22	8	3
Tb09.160.0810	2341	325	159	75	68	171	252	112	146	63	36	48	11	87	69	60	252	192	177	76	32
Tb09.160.0815	257	285	191	397	210	219	128	151	404	248	108	299	196	243	382	297	298	209	468	503	316
Tb09.160.0830	1809	166	85	72	31	103	51	35	63	14	13	21	7	35	27	21	18	72	117	32	7
Tb09.160.0840	1994	220	105	52	39	607	264	305	261	217	172	128	35	184	169	66	50	273	710	125	82
Tb09.160.0850	1844	253	196	27	44	652	253	207	198	296	228	127	20	165	150	36	18	215	779	69	37
Tb09.160.0860	3169	395	223	91	69	444	325	295	381	128	96	116	41	180	155	39	44	260	529	115	66
Tb09.160.0880	333	15	5	10	5	10	3	10	9	1	1	11	0	2	6	0	3	9	9	4	0
Tb09.160.0890	1515	188	213	30	47	499	218	112	126	135	112	41	12	83	49	12	13	186	211	46	23
Tb09.160.0900	469	117	106	35	42	241	104	58	60	43	29	21	2	37	41	7	7	55	197	48	19
Tb09.160.0910	965	242	173	20	26	354	143	30	59	80	63	49	10	108	133	13	6	66	282	27	10
Tb09.160.0920	4706	359	196	132	115	204	141	78	149	39	28	114	15	92	64	32	42	214	287	48	39
Tb09.160.0930	3078	480	303	90	82	292	210	87	144	74	56	46	13	151	87	59	75	295	373	61	34
Tb09.160.0940	276	18	7	8	12	13	17	12	17	5	1	1	0	3	3	2	5	8	21	2	3
Tb09.160.0950	1487	147	54	54	39	194	129	154	236	22	16	5	2	18	27	26	58	36	61	13	9
Tb09.160.0960	348	2	20	4	13	66	46	89	61	14	17	12	4	4	14	8	4	3	35	6	2
Tb09.160.0970	2235	593	333	102	73	607	302	194	282	221	158	67	26	117	104	39	57	279	325	61	36
Tb09.160.0980	264	20	16	1	10	39	26	9	9	3	6	5	0	3	2	2	1	8	27	0	0
Tb09.160.0990	2640	470	327	95	99	302	205	124	162	43	45	36	16	79	41	18	22	203	248	53	38
Tb09.160.1000	1379	269	262	24	35	588	217	133	138	228	150	53	6	99	123	27	22	144	438	54	30
Tb09.160.1010	1346	369	436	41	47	184	87	32	54	55	47	42	6	59	58	23	7	114	246	35	27
Tb09.160.1020	2472	553	520	95	75	316	184	90	155	118	68	75	19	157	104	38	34	377	427	65	37
Tb09.160.1030	1618	263	322	37	56	1460	566	836	962	516	470	472	99	459	650	394	219	325	1910	480	210
Tb09.160.1040	417	97	156	5	26	523	234	129	102	245	253	163	35	228	358	217	153	163	930	252	84
Tb09.160.1050	363	43	48	5	8	100	45	29	44	66	43	7	5	29	21	2	3	46	148	8	5
Tb09.160.1060	1602	429	266	46	50	804	342	270	245	222	194	68	18	137	150	34	35	248	571	101	43
Tb09.160.1070	1155	116	47	13	20	186	90	39	51	14	26	13	5	23	29	15	8	45	118	26	20
Tb09.160.1075	90	9	13	8	6	28	11	16	26	9	16	12	4	8	7	1	4	7	48	1	2
Tb09.160.1080	318	19	25	10	12	41	14	30	37	14	21	15	5	10	10	3	7	12	65	1	2
Tb09.160.1090	3847	1211	1036	307	273	853	445	345	548	261	174	206	51	280	183	94	94	602	758	148	83
Tb09.160.1096	90	9	13	8	6	28	11	16	26	9	16	12	4	8	7	1	4	7	48	1	2
Tb09.160.1100	630	173	246	24	36	771	208	329	312	345	233	159	16	264	301	144	76	395	1635	507	292
Tb09.160.1110	648	123	112	17	22	243	91	50	67	86	67	18	10	91	81	51	33	101	251	39	18
Tb09.160.1120	685	88	49	19	10	231	81	15	42	61	33	14	4	51	52	6	5	94	367	24	9
Tb09.160.1130	234	22	31	2	5	63	16	9	8	4	1	0	0	2	6	0	0	7	21	1	0
Tb09.160.1140	1453	161	113	31	27	179	99	42	74	36	29	38	4	37	43	11	7	50	140	27	20
Tb09.160.1150	396	197	282	204	298	245	160	112	425	9	12	14	6	31	42	75	159	82	282	79	27
Tb09.160.1160	2505	4059	2650	4327	2339	1351	930	709	4299	112	62	164	57	557	615	758	1743	1342	2581	1094	447
Tb09.160.1170	396	65	88	39	51	122	44	33	131	16	14	17	9	27	64	20	17	45	324	39	18
Tb09.160.1180	1962	1961	1291	2017	1060	705	443	342	1921	71	40	105	30	358	402	370	757	710	1578	529	226
Tb09.160.1190	396	49	47	36	33	34	25	19	96	13	7	12	3	10	39	12	12	31	202	26	8
Tb09.160.1200	25895	28673	14414	16088	11709	2942	1076	1798	4990	224	177	1061	321	1613	1500	2202	5260	4318	12134	3657	1358
Tb09.160.1210	3409	293	173	125	81	139	117	44	105	20	16	13	7	58	38	18	53	96	97	31	22
Tb09.160.1220	852	307	389	38	49	207	82	36	55	13	11	7	1	39	49	25	19	66	208	16	18
Tb09.160.1230	357	8	8	2	6	11	3	1	5	0	0	0	0	3	3	1	0	2	6	0	0
Tb09.160.1240	2416	587	588	97	111	378	185	125	190	35	42	34	10	122	110	36	29	184	294	48	24
Tb09.160.1250	3843	1012	953	165	220	686	389	195	320	111	67	141	23	173	164	65	73	439	548	102	60
Tb09.160.1260	1661	431	323	50	70	1619	586	315	313	484	388	262	65	514	571	172	96	626	2317	257	182
Tb09.160.1270	309	48	29	7	13	240	62	37	53	69	50	51	13	52	46	13	8	66	338	58	15
Tb09.160.1280	2040	359	313	44	56	237	76	47	124	54	31	39	7	96	82	19	18	161	314	39	17
Tb09.160.1290	6163	572	274	222	133	209	203	171	283	72	58	163	29	107	94	63	112	252	336	107	70
Tb09.160.1300	300	22	14	2	1	22	13	3	4	3	3	1	0	4	3	0	1	8	18	0	1
Tb09.160.1310	1887	224	178	47	65	184	160	52	59	28	19	44	5	71	27	16	22	85	128	44	16
Tb09.160.1320	405	37	37	2	3	48	49	20	25	28	21	1	0	25	5	4	3	25	60	5	7
Tb09.160.1330	1352	216	233	40	44	431	267	123	145	128	120	48	13	116	77	30	26	199	347	45	30
Tb09.160.1340	96	2	12	0	3	19	7	5	4	5	2	2	0	1	5	0	2	2	14	1	0
Tb09.160.1350	234	1	16	0	7	35	14	2	2	1	5	0	0	3	2	1	0	2	21	1	0
Tb09.160.1370	1697	305	237	56	49	178	102	69	90	89	45	63	4	93	72	33	35	94	180	43	21
Tb09.160.1380	189	4	10	1	4	37	14	0	2	0	0	0	0	0	2	0	0	4	12	0	0
Tb09.160.1390	402	22	20	1	1	35	19	2	2	3	7	0	1	3	6	0	1	7	22	0	1
Tb09.160.1400	4146	342	153	89	51	137	97	40	71	30	20	19	6	50	22	17	24	134	115	26	19
Tb09.160.1410	543	111	60	46	34	100	80	63	92	18	22	4	8	20	24	13	40	40	89	15	7
Tb09.160.1430	201	8	27	16	18	67	36	32	37	4	6	2	0	3	8	1	10	18	29	3	2
Tb09.160.1440	1718	406	159	247	93	310	293	200	285	65	75	48	14	88	54	52	173	208	148	54	39
Tb09.160.1460	264	55	31	3	6	66	24	2	2	47	42	3	2	23	16	1	0	22	67	1	1
Tb09.160.1470	1091	222	257	24	31	599	266	86	78	216	152	66	13	127	102	16	9	191	356	25	18
Tb09.160.1480	258	73	106	61	78	506	161	245	312	88	87	54	27	59	59	33	44	62	279	51	22
Tb09.160.1490	1218	299	399	151	203	2374	730	1087	1254	340	376	201	45	132	177	135	90	186	1316	148	96
Tb09.160.1500	294	37	24	1	13	139	49	8	11	27	13	4	2	10	13	1	4	11	83	1	3
Tb09.160.1510	198	30	46	8	29	328	108	34	13	4	5	1	2	8	8	5	5	20	99	1	3
Tb09.160.1520	2538	839	778	164	320	1875	691	545	724	125	98	107	26	151	201	112	78	218	994	220	125
Tb09.160.1530	225	41	36	27	17	116	46	69	117	20	9	12	3	16	23	16	9	26	71	43	20
Tb09.160.1540	342	19	24	2	8	44	21	3	5	9	8	1	3	14	13	2	1	14	39	0	0
Tb09.160.1550	276	56	46	2	10	54	21	4	5	9	14	1	0	28	22	2	5	24	88	0	1
Tb09.160.1560	8500	1030	694	335	248	238	156	92	196	78	63	89	35	226	136	75	168	372	347	122	66
Tb09.160.1570	638	91	62	11	10	236	127	27	23	120	104	28	5	150	95	11	3	169	229	7	8
Tb09.160.1590	402	94	119	3	9	66	39	16	20	26	24	12	1	32	46	15	17	56	275	15	4
Tb09.160.1600	426	83	155	8	23	219	73	21	55	34	23	9	5	45	39	19	13	88	178	11	7
Tb09.160.1610	1639	395	395	51	76	465	217	144	210	118	77	86	12	179	121	57	56	350	485	63	48
Tb09.160.1620	510	340	37	265	41	469	133	445	842	715	526	4823	1027	1122	1382	1062	539	430	1571	894	846
Tb09.160.1630	255	152	16	85	16	214	49	154	342	335	221	2011	432	451	677	390	204	159	701	302	262
Tb09.160.1640	213	106	81	76	65	262	134	266	417	79	96	163	50	65	74	39	26	91	298	136	64
Tb09.160.1660	301	101	146	122	94	290	143	298	371	127	102	274	62	102	115	87	48	181	341	205	84
Tb09.160.1670	657	171	144	21	28	1287	452	681	648	245	168	106	25	99	116	18	15	257	667	150	90
Tb09.160.1680	549	144	75	18	13	278	136	41	61	96	58	22	10	54	41	11	7	124	210	26	19
Tb09.160.1690	322	87	65	15	14	170	86	53	47	122	84	41	12	82	85	21	19	82	278	42	29
Tb09.160.1700	108	14	8	2	4	10	3	5	3	10	3	3	1	5	3	1	1	7	22	3	1
Tb09.160.1710	1152	237	130	30	17	549	266	95	114	228	240	60	19	194	221	31	18	298	810	57	30
Tb09.160.1720	201	25	35	0	10	59	25	16	13	36	16	8	2	15	23	6	2	27	66	5	4
Tb09.160.1730	345	71	97	6	14	206	70	22	19	44	41	20	7	53	40	7	6	93	219	9	6
Tb09.160.1740	1287	325	301	30	51	601	253	79	102	190	131	91	18	190	206	23	20	319	706	58	29
Tb09.160.1750	282	27	60	16	28	146	42	59	91	33	28	54	7	25	47	9	4	38	250	46	17
Tb09.160.1760	1231	398	373	190	140	1146	344	510	608	317	190	448	64	289	323	82	46	544	1543	353	230
Tb09.160.1770	189	31	6	2	4	14	5	0	1	5	0	2	0	5	3	0	0	17	26	2	0
Tb09.160.1780	3072	425	291	86	92	125	89	40	77	21	13	60	12	89	73	34	30	237	294	57	36
Tb09.160.1790	1701	371	379	74	83	482	187	66	130	121	81	95	17	234	217	19	20	333	542	49	26
Tb09.160.1800	144	9	25	0	6	99	22	9	9	5	2	2	0	4	5	0	0	2	32	2	2
Tb09.160.1810	153	24	36	2	6	158	44	20	21	13	6	3	0	10	13	3	5	17	52	6	2
Tb09.160.1820	834	156	130	31	48	438	194	172	145	68	66	56	10	85	99	117	66	115	534	222	105
Tb09.160.1830	276	13	11	7	12	44	18	20	23	11	3	30	7	13	9	1	4	5	30	16	9
Tb09.160.1840	195	10	5	8	7	54	17	28	36	3	0	19	1	5	6	3	4	7	17	9	5
Tb09.160.1850	258	1	2	7	2	11	5	10	11	3	0	4	1	3	3	2	1	3	5	1	4
Tb09.160.1860	510	1	0	3	1	5	1	3	7	0	1	0	2	0	4	3	2	0	7	3	1
Tb09.160.1870	111	2	1	6	3	3	1	5	5	1	0	1	0	1	3	1	1	0	3	2	1
Tb09.160.1880	342	3	3	1	5	4	1	5	2	1	0	0	0	0	1	0	1	1	2	0	0
Tb09.160.1890	111	1	1	0	1	1	0	0	0	0	0	0	0	0	1	0	0	0	2	0	0
Tb09.160.1900	129	2	1	0	4	5	4	4	2	2	1	0	2	1	0	0	1	0	2	0	0
Tb09.160.1920	405	33	6	11	2	25	15	30	30	11	2	13	0	5	3	3	5	5	16	6	5
Tb09.160.1930	297	4	1	1	4	3	1	2	3	0	1	4	1	1	0	0	0	4	13	0	1
Tb09.160.1950	1154	322	383	38	55	456	215	76	111	146	102	92	18	232	305	105	70	306	1042	111	69
Tb09.160.1960	318	66	118	4	16	242	77	39	47	13	27	11	0	7	19	8	4	30	86	12	8
Tb09.160.1970	138	42	47	2	10	184	85	52	43	30	24	6	2	11	14	5	6	30	85	15	9
Tb09.160.1980	1753	296	452	95	129	1046	503	771	807	164	143	179	59	143	179	159	129	243	844	393	162
Tb09.160.1990	515	115	140	12	15	396	116	41	50	118	55	41	2	99	102	17	18	108	381	43	35
Tb09.160.2000	1229	163	155	17	22	672	253	47	97	227	130	85	11	174	176	33	13	269	826	45	25
Tb09.160.2010	1120	247	275	22	38	484	187	58	96	113	97	45	15	121	147	23	13	216	546	44	21
Tb09.160.2020	518	140	136	22	22	517	282	197	184	145	94	87	16	122	182	67	43	201	761	185	83
Tb09.160.2030	162	9	14	5	2	14	8	8	4	6	3	2	1	2	4	7	1	7	34	11	4
Tb09.160.2040	895	225	47	29	20	114	53	19	21	28	20	5	2	57	64	53	43	81	148	33	17
Tb09.160.2050	4645	584	270	132	100	315	166	60	125	70	61	54	14	137	108	59	174	302	451	73	49
Tb09.160.2060	551	60	76	13	10	191	119	40	64	66	52	33	11	98	123	45	22	110	328	57	50
Tb09.160.2070	1101	383	184	152	86	729	352	466	653	315	245	204	71	210	217	113	90	392	815	279	123
Tb09.160.2080	462	96	54	28	32	241	121	143	244	97	107	63	13	74	66	23	37	93	283	72	34
Tb09.160.2090	2412	254	149	59	53	176	121	42	93	53	28	30	16	72	37	25	18	149	188	27	18
Tb09.160.2100	870	32	14	3	7	95	80	11	10	43	29	6	3	56	56	5	4	81	111	12	7
Tb09.160.2110	749	86	47	12	8	117	58	14	14	33	30	14	3	70	70	20	14	88	232	15	13
Tb09.160.2120	96	26	38	8	5	18	8	5	11	8	11	6	1	3	7	2	4	11	30	3	2
Tb09.160.2130	1312	284	254	59	49	217	111	64	101	58	63	22	2	69	57	38	68	156	187	54	27
Tb09.160.2140	303	37	59	3	7	76	52	20	30	3	5	3	1	13	9	3	1	30	45	3	6
Tb09.160.2150	676	71	62	21	17	147	60	69	54	72	51	77	12	94	97	59	38	92	332	91	34
Tb09.160.2160	356	184	72	34	24	555	251	414	509	155	109	152	23	109	113	29	28	181	389	169	109
Tb09.160.2170	368	163	89	41	22	234	88	86	93	161	104	84	19	176	153	47	41	200	759	261	158
Tb09.160.2180	818	230	196	32	26	281	113	28	56	152	74	56	12	167	151	25	18	213	386	20	13
Tb09.160.2190	177	11	5	9	4	14	2	7	7	5	8	4	0	7	2	0	1	6	11	4	1
Tb09.160.2200	1954	327	210	98	67	303	218	176	189	152	156	75	30	127	64	23	36	201	249	60	41
Tb09.160.2210	642	137	48	32	12	202	101	78	93	57	21	28	8	49	51	19	14	85	188	45	15
Tb09.160.2220	927	244	127	28	22	226	94	29	74	66	40	29	5	116	107	22	19	161	305	35	13
Tb09.160.2230	707	115	89	14	10	585	209	42	52	148	102	66	20	163	165	21	16	225	599	36	28
Tb09.160.2240	1827	375	142	66	38	168	158	29	53	27	28	20	5	73	54	26	73	187	163	15	15
Tb09.160.2250	601	217	94	47	25	280	149	193	298	141	114	71	23	69	65	25	19	117	202	58	27
Tb09.160.2260	2076	724	689	255	208	265	127	67	193	54	44	52	11	151	85	122	244	224	260	58	36
Tb09.160.2270	144	38	44	15	15	16	11	4	12	4	1	1	0	11	12	8	9	24	52	8	4
Tb09.160.2280	1596	338	269	37	45	557	258	72	81	134	117	78	11	158	124	26	24	279	423	42	13
Tb09.160.2290	4242	378	208	169	123	125	111	56	138	44	40	64	18	110	71	58	108	200	258	88	39
Tb09.160.2300	396	10	7	3	1	10	5	22	26	5	2	12	3	5	0	1	2	5	8	6	4
Tb09.160.2310	363	34	13	4	4	21	6	16	17	1	2	8	3	14	13	9	12	6	20	10	6
Tb09.160.2320	129	6	7	3	4	8	2	6	8	0	0	4	0	7	4	3	3	5	8	4	3
Tb09.160.2330	264	3	0	2	1	2	0	3	3	0	0	1	1	0	0	0	0	0	1	1	0
Tb09.160.2340	156	22	35	1	5	36	17	8	5	6	1	9	0	10	15	2	3	16	43	5	6
Tb09.160.2350	617	66	60	5	10	485	164	67	42	115	119	16	3	68	79	11	4	146	607	46	32
Tb09.160.2360	1207	276	319	56	59	354	140	48	74	55	35	33	8	140	122	26	27	197	471	48	23
Tb09.160.2370	735	489	732	278	357	2183	714	1765	2152	393	233	526	77	608	653	549	268	440	1910	852	447
Tb09.160.2380	340	161	127	61	42	420	121	166	144	100	61	46	19	146	132	127	83	149	349	175	92
Tb09.160.2390	291	100	98	43	34	326	131	299	269	78	52	56	11	55	52	64	25	80	282	108	39
Tb09.160.2400	1899	308	298	58	59	408	197	75	111	106	101	90	14	180	138	45	27	276	519	72	38
Tb09.160.2410	216	6	8	3	1	11	7	4	2	0	2	1	0	4	2	0	0	3	21	0	0
Tb09.160.2420	903	281	181	26	29	531	250	63	53	138	104	38	18	321	351	230	149	241	702	171	82
Tb09.160.2430	291	31	51	4	3	71	44	14	7	22	16	6	1	45	48	31	22	43	124	21	13
Tb09.160.2440	489	75	106	14	12	310	113	41	33	118	82	51	10	112	92	31	9	112	414	21	14
Tb09.160.2450	562	132	159	62	39	310	169	272	302	113	125	122	26	84	65	21	20	113	202	45	26
Tb09.160.2460	2214	380	421	70	95	620	319	99	168	188	147	153	19	218	150	24	20	336	557	58	41
Tb09.160.2470	2152	355	245	57	52	182	83	15	41	49	17	29	12	142	115	40	39	263	416	35	11
Tb09.160.2480	1042	241	213	28	19	592	256	108	126	108	84	58	14	145	167	48	30	220	466	58	26
Tb09.160.2490	631	421	274	445	259	647	390	443	847	434	176	1321	527	1235	1971	1090	667	878	2978	1416	1440
Tb09.160.2500	147	95	59	20	16	173	53	36	67	122	69	37	17	93	113	18	8	140	367	96	39
Tb09.160.2540	684	336	291	90	95	953	400	632	842	334	229	454	116	216	202	99	85	474	737	363	169
Tb09.160.2550	631	464	291	495	281	701	402	464	885	459	186	1413	570	1391	2101	1186	735	927	3173	1519	1648
Tb09.160.2560	147	95	59	20	16	173	53	36	67	122	69	37	17	93	113	18	8	140	367	96	39
Tb09.160.2600	684	336	291	90	95	953	400	632	842	334	229	454	116	216	202	99	85	474	737	363	169
Tb09.160.2620	1669	303	241	61	58	585	262	179	236	189	119	113	26	172	152	47	26	307	593	104	82
Tb09.160.2630	135	19	28	5	5	54	16	21	13	7	8	8	2	11	13	3	0	29	77	10	9
Tb09.160.2640	141	18	25	5	5	18	20	17	10	4	8	6	4	8	7	3	4	19	48	11	8
Tb09.160.2650	3974	265	109	97	69	113	194	63	122	8	8	22	6	45	41	33	245	114	108	39	21
Tb09.160.2660	117	3	0	1	3	4	3	0	0	0	0	0	0	0	0	0	1	0	3	0	0
Tb09.160.2680	291	1	3	0	3	22	43	6	14	1	4	0	0	3	1	4	14	8	3	1	0
Tb09.160.2690	417	5	1	0	0	2	7	1	1	0	1	0	0	3	0	0	1	2	4	2	0
Tb09.160.2700	360	1	2	0	1	5	4	3	5	1	1	1	0	0	3	1	3	3	7	1	0
Tb09.160.2710	753	3	3	1	5	15	20	2	10	1	2	1	0	0	1	1	6	4	8	1	0
Tb09.160.2720	150	0	1	0	0	4	4	4	2	0	0	0	0	1	1	0	3	2	2	0	3
Tb09.160.2730	480	0	3	0	1	3	1	1	3	0	0	0	1	0	0	0	0	1	4	0	0
Tb09.160.2740	165	4	1	1	3	16	8	11	23	0	1	0	0	0	1	3	2	1	10	0	0
Tb09.160.2750	144	12	7	2	4	13	3	9	3	6	4	0	0	0	3	3	9	3	13	3	2
Tb09.160.2760	153	15	2	3	2	19	11	16	27	3	1	1	1	3	3	4	7	5	15	3	0
Tb09.160.2770	2322	930	499	393	233	668	419	262	588	152	123	46	19	132	113	53	95	356	433	139	63
Tb09.160.2780	3238	1932	1490	951	705	1062	563	519	1184	355	234	296	83	920	629	520	766	1196	1657	628	321
Tb09.160.2810	2800	1852	1073	1058	598	697	500	284	721	246	146	169	75	1103	692	722	1298	1361	1340	675	320
Tb09.160.2840	2800	1485	824	784	451	536	398	231	570	185	111	138	68	854	522	502	923	976	1015	540	245
Tb09.160.2850	273	59	79	32	26	83	32	25	42	5	8	6	5	41	32	20	27	36	137	31	16
Tb09.160.2860	1409	352	275	88	63	253	150	72	178	76	40	48	12	171	149	40	34	202	340	61	28
Tb09.160.2870	165	30	32	7	5	45	16	14	25	8	4	1	2	8	11	3	4	14	43	6	6
Tb09.160.2880	171	2	4	0	2	9	0	4	3	1	1	1	0	2	1	0	0	5	8	0	0
Tb09.160.2890	962	200	144	18	19	363	154	30	27	139	103	29	7	285	295	77	55	291	1005	48	40
Tb09.160.2900	1683	133	60	21	27	243	125	44	56	66	48	29	7	112	68	8	17	140	195	18	6
Tb09.160.2910	1169	152	163	46	61	173	83	38	85	32	32	18	5	66	63	30	23	83	193	59	37
Tb09.160.2920	150	17	11	1	5	32	12	3	5	4	1	1	0	6	11	3	3	4	16	6	2
Tb09.160.2930	369	13	28	1	14	39	16	18	13	2	3	3	1	6	6	1	2	2	16	2	0
Tb09.160.2950	234	4	2	1	1	28	5	7	5	2	2	0	0	2	0	0	1	1	5	2	1
Tb09.160.2960	3209	266	203	48	61	74	79	38	74	15	16	4	5	27	27	23	31	79	98	14	9
Tb09.160.2970	1633	270	291	43	41	415	218	34	61	113	83	16	8	133	147	25	33	262	537	34	24
Tb09.160.2980	4447	783	498	144	131	164	102	65	121	37	36	45	16	150	99	35	73	280	288	35	32
Tb09.160.2990	1258	217	96	37	20	201	125	27	28	163	124	33	9	180	239	102	64	198	476	102	47
Tb09.160.3000	195	25	18	4	2	77	42	9	4	10	16	1	2	26	28	16	2	18	90	13	3
Tb09.160.3010	132	6	2	1	3	5	1	0	5	2	2	0	0	5	1	0	0	2	9	4	0
Tb09.160.3020	1287	407	418	221	205	556	234	217	499	69	37	33	9	192	209	225	241	192	403	139	66
Tb09.160.3050	1361	216	184	21	39	160	82	25	37	40	25	33	6	108	71	17	15	159	266	17	12
Tb09.160.3060	2166	271	100	42	28	145	74	32	64	12	12	25	3	68	68	30	31	102	160	18	13
Tb09.160.3070	177	16	15	4	4	29	8	3	6	5	7	4	0	9	3	3	7	4	27	2	3
Tb09.160.3080	396	23	12	5	11	49	26	25	22	7	3	14	0	8	12	4	7	10	32	4	2
Tb09.160.3090	2654	3291	1451	3836	1478	1356	884	548	2090	738	538	332	266	595	370	361	979	667	454	251	149
Tb09.160.3100	231	21	46	5	15	19	18	11	26	18	13	16	3	22	37	8	6	30	82	11	3
Tb09.160.3110	1688	468	433	52	49	709	255	62	105	150	76	100	22	367	316	70	66	399	922	64	38
Tb09.160.3120	3257	494	255	79	83	144	125	60	101	36	39	29	11	66	41	25	44	194	175	41	24
Tb09.160.3130	102	1	1	0	0	4	1	0	0	0	0	0	0	1	0	0	0	0	7	0	0
Tb09.160.3140	529	87	74	10	11	115	42	27	36	37	19	7	0	29	32	3	2	36	149	18	11
Tb09.160.3150	3114	687	375	197	185	269	153	82	116	41	48	55	9	58	29	27	26	99	120	27	25
Tb09.160.3160	791	95	77	20	16	183	109	60	37	78	43	24	10	32	27	4	14	71	112	20	16
Tb09.160.3170	273	10	25	3	10	76	24	7	12	15	10	3	2	6	8	1	1	10	31	3	1
Tb09.160.3180	213	10	9	2	2	29	9	6	6	3	7	0	2	3	3	1	1	6	23	4	1
Tb09.160.3190	117	3	0	0	3	4	3	0	2	0	1	0	0	0	0	0	0	1	5	0	0
Tb09.160.3200	198	18	10	3	7	11	2	6	4	3	3	3	0	9	3	3	1	8	20	5	2
Tb09.160.3210	1580	250	136	70	54	323	204	98	165	98	64	85	18	82	56	15	16	238	327	69	39
Tb09.160.3220	4038	637	560	176	200	277	309	123	229	45	33	71	14	83	60	28	64	309	227	68	36
Tb09.160.3240	4827	614	459	207	184	133	76	86	153	24	24	58	16	56	48	33	70	131	180	55	39
Tb09.160.3250	96	20	11	0	6	8	8	4	7	6	2	6	0	1	2	0	1	4	14	1	0
Tb09.160.3260	1513	235	131	35	31	294	160	51	60	74	43	25	11	60	52	12	12	127	161	10	7
Tb09.160.3270	1261	3587	3012	4888	2846	5047	2876	5745	10452	447	371	191	94	945	573	1015	1896	1512	1275	592	385
Tb09.160.3280	153	218	163	227	263	392	193	439	949	28	51	6	4	64	62	40	50	41	131	38	6
Tb09.160.3290	153	76	111	86	245	336	133	344	728	19	27	7	2	46	48	39	77	39	125	31	5
Tb09.160.3300	114	431	330	415	336	516	357	521	1154	126	94	39	22	147	111	136	259	136	311	109	44
Tb09.160.3310	129	532	382	466	431	905	451	802	1683	80	91	20	14	168	101	125	381	153	242	88	46
Tb09.160.3320	2176	388	281	49	62	865	417	224	236	387	296	169	30	277	278	25	34	338	1018	97	65
Tb09.160.3330	138	6	10	2	0	6	3	0	2	4	5	2	0	3	1	1	0	3	12	1	0
Tb09.160.3340	147	27	12	3	2	20	11	14	8	7	6	5	1	12	5	0	2	7	29	2	2
Tb09.160.3350	282	18	12	3	3	32	11	6	9	13	8	1	2	6	11	0	3	4	22	2	2
Tb09.160.3370	925	90	66	16	17	211	125	27	34	128	99	39	8	48	51	7	9	106	184	25	8
Tb09.160.3380	2691	426	169	77	65	287	171	69	85	103	83	86	19	146	72	21	30	308	467	66	40
Tb09.160.3390	468	4	2	4	4	12	7	11	14	2	4	9	4	2	0	1	1	2	5	4	3
Tb09.160.3400	1504	37	14	17	16	58	23	64	95	9	13	47	14	27	22	10	4	20	54	26	12
Tb09.160.3410	1473	182	213	35	44	442	165	69	108	78	45	73	13	179	153	31	38	271	633	65	43
Tb09.160.3420	108	8	12	6	10	22	12	19	34	8	12	29	5	8	12	14	7	8	47	15	8
Tb09.160.3430	384	27	25	10	14	54	26	23	42	10	11	36	5	17	12	4	6	14	40	19	9
Tb09.160.3450	114	5	0	0	2	4	1	5	5	0	0	0	0	1	0	1	2	0	4	1	0
Tb09.160.3460	414	17	5	20	9	23	8	19	27	2	3	24	7	3	4	2	4	8	18	13	5
Tb09.160.3470	3868	728	524	176	181	154	97	90	151	31	10	80	23	147	123	84	116	219	336	148	79
Tb09.160.3480	1243	253	169	30	26	312	122	45	55	124	64	47	10	114	117	29	28	161	421	38	25
Tb09.160.3490	720	66	82	16	20	192	114	36	37	57	43	19	5	58	60	8	5	86	174	13	8
Tb09.160.3500	1230	217	292	26	54	568	202	65	81	155	96	64	15	133	124	18	11	295	715	69	35
Tb09.160.3510	1138	270	329	46	61	892	309	182	182	202	150	113	20	273	250	68	29	406	961	128	98
Tb09.160.3520	1188	285	287	51	72	617	312	179	198	227	184	70	18	209	151	34	26	306	567	80	42
Tb09.160.3530	315	347	101	531	116	1280	456	2151	2800	331	168	629	95	231	308	249	190	396	1962	877	532
Tb09.160.3540	600	102	138	20	16	428	177	104	141	125	98	58	9	104	103	25	11	135	610	62	32
Tb09.160.3550	862	208	306	31	31	746	277	79	85	214	113	68	5	348	457	47	14	348	1531	49	35
Tb09.160.3560	1356	218	208	65	60	383	108	92	196	113	53	85	13	155	166	52	25	170	739	141	75
Tb09.160.3580	96	16	41	2	7	51	14	9	27	21	15	11	1	15	21	13	8	34	87	17	8
Tb09.160.3590	2870	2533	2341	760	599	609	330	170	950	88	40	94	33	532	548	467	630	943	1606	535	298
Tb09.160.3600	558	69	105	8	27	82	60	25	123	3	7	4	4	22	24	17	18	44	127	33	13
Tb09.160.3610	318	33	119	15	33	70	34	11	81	3	3	7	2	18	28	8	14	34	89	31	10
Tb09.160.3620	276	212	160	42	64	89	41	17	99	7	9	14	2	28	51	23	31	62	209	51	20
Tb09.160.3630	2778	2324	2115	720	573	641	316	148	868	66	27	85	27	502	519	497	586	780	1517	446	234
Tb09.160.3640	99	110	151	28	44	52	19	12	51	4	3	5	1	41	32	41	59	50	132	24	11
Tb09.160.3650	297	131	193	35	41	32	19	15	55	12	8	14	4	40	33	32	52	49	109	28	12
Tb09.160.3660	156	5	5	4	3	7	2	2	9	0	1	2	0	0	1	1	1	2	2	1	0
Tb09.160.3670	404	564	353	608	287	693	366	639	910	273	185	138	100	273	281	185	135	156	284	166	85
Tb09.160.3680	138	162	88	84	90	113	51	149	189	65	73	39	24	62	65	41	37	14	134	51	10
Tb09.160.3690	2003	267	278	27	44	525	202	134	110	188	184	99	15	116	90	29	20	228	461	50	33
Tb09.160.3700	303	8	3	9	0	5	3	0	2	1	1	0	2	0	3	0	1	2	7	0	0
Tb09.160.3710	879	823	952	664	580	637	378	350	836	117	111	110	60	152	196	189	188	320	689	348	174
Tb09.160.3720	291	2	5	2	8	7	3	2	20	4	1	1	1	6	5	1	6	2	25	7	2
Tb09.160.3730	1884	1071	772	433	254	1711	608	702	1307	572	353	381	67	901	813	354	255	1060	2195	731	404
Tb09.160.3740	386	121	175	54	55	402	178	228	347	77	54	80	19	138	138	109	61	179	613	210	121
Tb09.160.3750	102	22	42	7	18	409	107	154	174	23	34	31	7	41	26	32	24	50	241	64	27
Tb09.160.3760	2913	340	303	69	55	178	159	76	110	82	78	54	19	127	81	36	68	303	260	64	45
Tb09.160.3770	204	8	3	0	1	5	2	1	2	4	2	1	0	3	5	0	0	4	24	3	0
Tb09.160.3780	1467	502	640	111	123	1023	363	311	556	244	150	114	14	213	197	74	86	508	940	205	120
Tb09.160.3790	102	14	29	1	10	31	20	8	13	18	14	13	2	33	16	0	2	19	96	7	2
Tb09.160.3800	1121	170	184	14	30	279	147	26	52	112	74	46	6	138	101	10	5	164	393	25	12
Tb09.160.3810	363	58	62	7	5	125	45	23	31	23	24	14	5	38	29	7	4	47	114	10	4
Tb09.160.3820	1506	824	592	364	213	537	286	253	524	110	82	92	51	270	217	124	155	244	457	151	58
Tb09.160.3830	1384	309	253	33	49	832	250	95	156	217	122	99	21	140	136	24	8	255	593	42	22
Tb09.160.3840	135	20	15	1	4	38	5	3	7	8	10	5	0	11	6	0	2	8	15	1	0
Tb09.160.3850	1251	269	250	43	37	228	107	52	67	84	66	46	12	121	97	9	13	188	328	26	14
Tb09.160.3870	213	46	28	5	5	81	36	30	38	33	35	47	2	32	23	7	5	50	113	24	20
Tb09.160.3880	612	130	149	24	24	827	332	403	342	253	220	218	49	119	121	39	17	252	726	142	99
Tb09.160.3890	2481	286	95	56	42	296	141	45	74	52	29	56	8	156	163	31	32	267	540	36	27
Tb09.160.3910	708	137	89	24	17	186	86	38	41	64	34	53	7	64	68	11	11	86	286	41	21
Tb09.160.3920	111	7	15	1	3	50	19	4	6	6	0	2	0	7	11	0	1	12	54	1	1
Tb09.160.3930	904	269	201	38	30	506	205	72	140	214	140	115	17	317	256	61	37	380	1135	125	102
Tb09.160.3940	102	25	46	7	11	184	50	22	31	46	31	15	1	36	57	14	9	101	242	24	11
Tb09.160.3950	144	67	100	12	21	233	61	16	32	78	61	32	3	95	134	35	15	147	545	54	16
Tb09.160.3960	1410	352	284	41	43	581	204	38	54	171	109	63	7	326	264	50	30	406	663	35	40
Tb09.160.3970	165	6	6	1	2	8	3	6	9	0	3	3	0	3	4	0	3	6	9	2	0
Tb09.160.3980	2637	225	96	62	43	83	74	22	28	19	8	6	1	43	37	25	82	71	84	9	10
Tb09.160.3990	2414	318	405	48	64	393	150	57	99	63	43	66	7	106	74	28	14	185	306	38	15
Tb09.160.4000	141	0	12	1	1	13	12	3	1	4	2	0	0	2	3	0	1	2	10	1	0
Tb09.160.4010	171	14	11	1	1	9	5	0	1	3	1	0	0	4	1	1	0	7	11	0	0
Tb09.160.4020	4126	547	213	145	82	203	158	63	137	35	26	34	14	102	73	38	121	255	305	72	34
Tb09.160.4030	132	8	5	2	0	1	1	0	1	2	1	0	0	0	2	0	3	6	3	0	2
Tb09.160.4040	282	19	27	3	1	50	25	10	6	4	5	2	0	4	6	1	3	25	38	6	5
Tb09.160.4050	105	18	15	1	8	31	11	1	6	3	2	2	1	7	5	2	4	20	44	5	3
Tb09.160.4060	456	12	9	3	6	26	8	4	7	3	6	1	1	4	2	0	5	11	34	4	3
Tb09.160.4070	261	4	5	0	6	31	18	10	7	1	9	1	0	1	2	2	3	8	38	4	2
Tb09.160.4080	234	44	10	5	3	8	18	5	4	12	10	4	2	11	9	3	3	16	37	5	0
Tb09.160.4090	3994	1108	892	639	454	213	124	90	304	30	24	74	13	94	61	50	151	221	302	102	50
Tb09.160.4100	207	30	34	3	22	11	8	7	11	3	2	1	0	6	2	2	2	6	18	2	1
Tb09.160.4110	189	11	3	3	1	0	5	3	4	3	0	1	0	0	0	0	4	2	4	2	0
Tb09.160.4120	4041	670	546	136	142	601	338	126	226	82	69	80	11	180	111	29	48	361	511	76	50
Tb09.160.4130	1424	232	276	32	38	593	204	50	80	128	105	70	7	117	129	14	6	173	531	29	20
Tb09.160.4140	141	13	15	0	4	7	9	3	0	13	15	2	0	5	10	0	0	10	51	1	1
Tb09.160.4150	548	229	461	69	140	847	411	393	436	158	111	102	20	221	294	126	77	276	1318	325	141
Tb09.160.4160	216	59	52	16	11	185	57	74	68	51	38	21	9	58	82	35	19	44	304	62	31
Tb09.160.4170	195	19	5	1	3	23	15	20	28	2	0	1	0	1	7	3	3	9	32	7	3
Tb09.160.4180	2647	848	419	129	100	669	301	161	385	150	89	47	16	164	158	57	74	422	736	176	80
Tb09.160.4200	390	1153	1143	1447	1093	5042	1653	6665	7717	1474	1215	6476	1603	2236	2074	1605	802	1849	4630	2392	2221
Tb09.160.4210	6572	782	446	211	136	203	131	133	205	50	53	83	22	144	109	59	130	359	383	108	75
Tb09.160.4220	1152	222	219	23	19	666	182	22	32	176	94	35	5	210	189	17	16	252	771	21	20
Tb09.160.4230	153	29	21	25	17	9	9	2	8	2	0	3	0	4	9	4	10	9	28	14	4
Tb09.160.4240	1372	812	400	443	244	134	75	41	163	8	1	26	13	84	136	122	257	83	192	96	39
Tb09.160.4250	719	1773	3213	1905	2742	4995	2246	3674	7931	358	192	553	159	539	692	911	901	1049	4400	2218	1281
Tb09.160.4260	213	36	25	14	11	47	22	13	29	26	14	14	4	11	23	4	24	13	97	19	13
Tb09.160.4270	440	127	111	22	20	341	133	46	49	106	70	35	20	112	161	60	41	125	483	79	44
Tb09.160.4280	719	1680	3120	1812	2637	4866	2150	3616	7642	351	189	533	152	523	674	852	847	992	4239	2082	1193
Tb09.160.4290	1947	321	239	117	153	875	485	491	875	147	74	70	27	154	145	55	40	293	609	135	74
Tb09.160.4300	1438	690	367	189	112	851	376	405	787	359	231	214	74	272	255	72	51	473	1225	250	95
Tb09.160.4310	3215	851	699	279	263	762	463	134	385	33	25	37	6	177	132	189	426	574	597	155	88
Tb09.160.4320	219	34	37	4	10	57	29	9	16	8	4	0	0	6	9	10	21	31	34	10	0
Tb09.160.4330	213	5	18	0	9	16	22	2	4	3	0	0	0	4	1	4	13	9	13	4	1
Tb09.160.4340	93	0	6	0	5	16	5	2	1	0	0	1	0	0	3	1	2	4	2	1	0
Tb09.160.4350	117	1	12	0	5	70	22	8	14	5	1	0	0	3	2	2	3	5	23	2	3
Tb09.160.4360	135	4	2	1	1	2	0	1	2	2	3	0	0	1	0	1	2	0	4	0	0
Tb09.160.4370	138	1	2	0	2	20	3	0	5	2	1	0	0	1	0	0	0	1	17	1	0
Tb09.160.4380	759	86	88	12	15	391	112	22	31	40	37	3	1	35	33	30	26	74	210	31	14
Tb09.160.4390	147	13	25	2	5	105	45	3	6	14	5	0	0	8	15	8	2	15	48	9	3
Tb09.160.4400	1869	249	203	42	44	537	287	73	121	160	129	77	9	114	80	21	19	196	310	36	26
Tb09.160.4410	126	23	13	1	2	35	17	6	7	11	6	0	1	20	5	0	1	14	28	1	0
Tb09.160.4420	111	1	4	1	4	11	7	14	21	3	2	4	0	1	2	1	1	5	29	1	2
Tb09.160.4430	1297	205	149	58	49	595	311	319	441	164	91	60	17	84	62	43	55	251	503	161	73
Tb09.160.4440	971	256	167	54	30	267	118	120	134	91	59	38	10	41	35	11	11	97	261	95	52
Tb09.160.4450	801	3768	2558	4308	2450	8756	2938	8651	14073	2675	1759	8867	2602	5435	5590	4118	2337	4972	11802	6703	4574
Tb09.160.4460	1947	2895	3923	383	802	2370	843	582	815	202	182	157	31	395	476	249	267	483	2282	264	164
Tb09.160.4480	2350	2775	3829	413	877	2828	909	858	1159	222	205	269	40	418	523	263	259	464	2273	269	168
Tb09.160.4500	3011	458	256	115	89	213	124	46	101	36	22	47	7	89	68	56	104	165	172	55	30
Tb09.160.4510	210	1	1	0	0	3	0	0	0	0	0	0	0	0	0	0	0	0	1	0	0
Tb09.160.4520	668	459	410	286	219	509	266	405	810	72	50	52	15	111	87	125	107	173	380	199	115
Tb09.160.4530	474	197	202	116	114	280	111	162	265	24	27	27	4	52	55	62	62	58	231	85	34
Tb09.160.4540	2376	493	520	50	73	711	354	48	96	204	107	40	10	185	106	27	28	337	671	33	19
Tb09.160.4550	3497	687	708	102	141	184	188	118	186	53	57	50	13	83	61	22	32	248	254	53	30
Tb09.160.4560	1353	3368	1642	3368	1684	1739	807	824	3624	170	97	262	99	833	1004	1570	1626	1991	5255	3113	1720
Tb09.160.4570	1657	2819	1356	2932	1365	1700	751	811	3333	198	122	331	82	747	929	1406	1345	1754	4724	2722	1484
Tb09.160.4580	1589	160	82	32	30	333	157	67	82	104	78	51	13	54	46	10	7	87	145	25	18
Tb09.160.4590	1121	2834	1349	3064	1393	1705	738	788	3398	132	71	243	74	809	981	1470	1456	1887	5094	2963	1640
Tb09.160.4600	2093	614	442	114	96	273	124	54	125	29	15	18	5	65	45	42	51	106	138	42	11
Tb09.160.4610	1607	267	319	34	55	420	188	114	128	184	141	100	12	210	233	81	45	203	752	56	21
Tb09.160.4620	1239	285	404	46	64	343	165	45	90	28	12	22	4	87	93	69	69	151	359	49	22
Tb09.160.4630	1456	1422	1672	535	505	2505	883	644	1192	717	446	569	136	841	829	527	306	1348	3657	923	500
Tb09.160.4640	642	171	175	49	44	167	84	53	130	42	26	36	3	52	41	19	9	80	242	56	21
Tb09.160.4650	183	48	64	5	20	45	24	18	37	11	11	9	2	15	15	2	3	20	81	18	3
Tb09.160.4660	2013	557	410	72	89	374	218	54	117	113	64	31	6	104	69	10	18	287	288	38	15
Tb09.160.4670	947	226	228	40	24	368	142	36	55	96	48	27	6	108	129	11	3	163	520	24	13
Tb09.160.4680	2993	428	288	71	74	194	155	84	135	100	72	64	19	96	96	24	43	219	268	45	26
Tb09.160.4690	447	61	46	5	4	229	86	115	109	70	48	27	8	60	52	25	22	69	175	46	35
Tb09.160.4700	1526	509	603	82	92	398	124	55	124	111	57	80	15	218	195	82	58	263	910	162	80
Tb09.160.4710	4728	1024	525	234	170	111	85	44	114	31	23	30	9	90	83	47	139	237	236	67	25
Tb09.160.4720	855	163	133	32	34	114	61	23	56	9	19	3	4	30	46	39	63	53	155	34	17
Tb09.160.4730	402	46	94	15	35	119	50	46	73	33	23	15	8	32	35	41	46	42	200	32	3
Tb09.160.4740	402	29	63	2	14	98	36	66	63	18	14	24	6	11	13	15	15	19	84	7	5
Tb09.160.4750	2001	428	386	68	45	804	358	108	182	243	156	97	17	137	79	26	17	288	371	41	37
Tb09.160.4760	4578	400	258	148	105	639	431	185	219	190	109	78	20	208	202	152	491	334	577	159	97
Tb09.160.4770	2726	604	251	528	285	309	318	174	477	7	9	9	5	60	46	97	472	94	124	31	18
Tb09.160.4800	450	9	25	7	11	63	37	18	37	3	1	1	3	4	4	3	31	8	13	3	4
Tb09.160.4810	378	61	104	21	50	377	115	100	96	31	22	10	1	12	19	19	9	36	103	15	10
Tb09.160.4820	324	31	71	8	26	277	61	99	66	23	16	3	1	11	12	7	7	12	64	8	14
Tb09.160.4830	3700	308	322	77	127	1008	350	339	336	132	111	61	17	114	123	53	33	147	375	57	42
Tb09.160.4840	721	121	114	47	36	99	47	28	65	30	16	29	7	45	57	26	33	34	106	37	19
Tb09.160.4850	1473	317	346	47	56	496	252	150	181	157	101	93	17	104	117	36	36	254	439	137	54
Tb09.160.4860	1907	176	165	48	40	158	62	47	67	59	59	127	35	88	78	14	20	197	319	30	18
Tb09.160.4870	7738	999	815	315	274	329	346	293	443	91	107	236	92	145	73	57	143	483	381	106	69
Tb09.160.4880	378	37	32	7	11	29	20	53	42	18	8	63	1	11	16	2	2	19	68	10	6
Tb09.160.4890	519	50	53	15	11	23	19	27	24	20	17	33	15	19	17	5	4	31	58	14	9
Tb09.160.4900	336	44	31	9	10	19	10	3	8	13	15	17	4	12	6	5	3	17	27	10	3
Tb09.160.4910	1788	405	355	61	81	674	264	324	351	130	81	128	20	134	69	23	28	335	352	65	50
Tb09.160.4920	1099	236	179	35	24	271	114	100	133	61	32	70	13	66	62	10	15	156	258	35	21
Tb09.160.4930	1073	201	134	25	16	138	64	26	35	39	35	49	9	84	78	12	11	126	281	31	26
Tb09.160.4940	474	25	18	19	12	10	9	45	54	6	4	21	7	3	2	13	5	9	9	21	8
Tb09.160.4950	879	44	18	12	9	21	10	33	48	8	3	16	1	11	12	3	12	20	24	14	3
Tb09.160.4960	144	6	5	8	9	5	0	12	17	1	1	6	3	1	0	1	0	0	2	4	1
Tb09.160.4970	438	11	8	3	5	9	4	9	13	1	0	3	2	0	1	2	3	2	0	2	1
Tb09.160.4980	147	2	2	2	2	14	13	12	14	2	0	2	0	0	0	0	0	0	0	0	0
Tb09.160.4990	552	5	0	2	4	13	1	4	6	1	0	0	0	1	1	0	0	0	0	0	0
Tb09.160.5000	384	3	3	5	6	13	1	3	4	1	0	0	2	2	1	0	2	1	6	1	0
Tb09.160.5010	372	9	2	2	6	9	5	4	8	2	0	7	1	3	1	0	0	5	14	0	1
Tb09.160.5020	1337	165	172	20	29	537	168	74	81	137	89	40	5	173	180	78	38	164	647	83	63
Tb09.160.5030	1989	367	408	40	91	594	229	83	146	77	63	77	11	254	269	50	26	281	884	70	41
Tb09.160.5040	420	40	43	8	11	181	92	64	80	64	34	15	7	35	30	14	10	51	174	27	16
Tb09.160.5050	512	95	94	7	10	344	158	84	54	157	121	39	7	88	105	13	6	103	527	19	15
Tb09.160.5060	1151	525	325	156	119	442	187	175	378	143	72	64	20	204	212	172	160	345	553	223	144
Tb09.160.5070	826	236	174	116	98	463	170	337	551	155	79	138	38	178	145	84	86	209	462	175	87
Tb09.160.5080	1064	51	42	28	23	89	56	35	48	30	42	31	4	21	12	5	8	30	49	12	13
Tb09.160.5090	294	13	13	1	2	11	6	1	5	5	2	5	0	4	3	1	0	3	8	0	2
Tb09.160.5100	728	196	220	56	56	450	205	118	133	145	90	112	20	272	288	164	108	252	940	266	184
Tb09.160.5110	693	66	43	17	7	87	47	10	25	27	7	23	2	36	50	5	3	68	138	13	4
Tb09.160.5120	4956	452	363	145	134	460	538	265	380	85	92	118	22	144	84	43	53	349	279	69	48
Tb09.160.5130	1614	221	161	36	34	575	235	158	164	162	97	81	19	70	104	33	25	211	493	153	99
Tb09.160.5140	291	8	11	4	1	40	14	11	3	4	4	1	0	1	5	3	0	2	39	10	3
Tb09.160.5150	897	166	103	21	17	365	175	105	76	209	142	36	10	161	121	15	15	189	395	39	21
Tb09.160.5160	915	153	174	13	21	491	190	23	41	166	127	45	6	193	224	12	14	266	589	26	15
Tb09.160.5170	381	227	82	33	11	354	154	144	165	112	69	55	5	146	180	60	36	170	500	126	69
Tb09.160.5180	1350	169	102	32	34	93	54	26	34	21	19	24	9	56	50	49	26	91	229	59	33
Tb09.160.5190	844	99	84	24	18	220	75	51	72	61	33	47	6	53	67	16	9	68	149	21	20
Tb09.160.5200	2019	985	426	714	313	856	466	567	1216	186	119	180	51	387	435	389	392	375	1545	587	286
Tb09.160.5210	432	22	7	5	2	30	14	30	42	21	17	32	7	16	14	8	11	9	48	7	8
Tb09.160.5220	3840	615	504	123	114	375	380	98	159	89	161	70	15	153	86	28	45	330	262	41	32
Tb09.160.5230	762	128	172	27	22	320	200	88	104	111	84	34	12	64	67	23	10	114	437	51	30
Tb09.160.5240	1490	318	204	42	33	787	353	95	97	228	251	42	7	86	62	17	14	191	231	26	8
Tb09.160.5250	5134	892	420	266	177	221	160	70	217	67	34	114	28	133	114	61	95	335	450	90	44
Tb09.160.5260	1544	184	89	25	24	141	89	41	52	42	20	57	8	94	103	41	36	122	244	22	24
Tb09.160.5270	1001	221	189	28	22	152	60	17	35	48	26	41	12	129	149	40	25	180	483	37	29
Tb09.160.5280	2232	385	417	58	43	1054	355	121	128	175	105	214	50	212	169	16	19	363	532	59	43
Tb09.160.5290	312	28	11	1	4	15	7	8	10	3	9	8	5	8	5	1	5	6	23	2	0
Tb09.160.5300	633	128	118	16	10	155	67	11	17	23	17	7	2	104	127	77	34	86	231	43	32
Tb09.160.5310	894	105	148	5	8	153	75	17	22	39	16	7	1	81	87	20	22	48	310	18	15
Tb09.160.5320	1142	215	210	27	29	373	121	53	102	100	47	57	7	133	131	27	13	179	542	81	30
Tb09.160.5330	1915	195	197	42	67	87	55	55	157	16	10	30	3	35	20	20	25	76	162	54	23
Tb09.160.5340	420	37	35	8	10	37	21	5	15	5	4	1	0	5	4	2	1	13	24	6	1
Tb09.160.5350	1464	45	18	18	9	30	18	24	45	1	2	6	1	2	8	3	5	6	15	7	2
Tb09.160.5360	375	8	10	6	4	3	1	1	12	0	0	1	0	0	1	0	0	0	2	0	0
Tb09.160.5370	1146	6	8	1	1	1	0	1	2	1	0	0	0	0	0	0	1	0	0	0	0
Tb09.160.5380	1123	17	12	8	9	48	32	60	73	1	2	2	0	3	2	3	6	6	13	4	1
Tb09.160.5390	1419	26	25	12	15	40	29	23	50	0	2	2	0	1	4	3	2	0	10	0	2
Tb09.160.5400	789	0	1	0	0	4	3	1	3	0	0	0	0	0	0	0	1	0	0	0	0
Tb09.160.5410	856	0	0	0	0	0	0	0	0	0	0	0	0	0	0	0	0	0	0	0	0
Tb09.160.5420	363	0	0	0	0	0	0	0	0	0	0	0	0	0	0	0	0	0	0	0	0
Tb09.160.5430	777	11	11	10	4	12	12	8	13	0	0	4	0	1	0	0	2	0	1	0	1
Tb09.160.5440	1104	0	0	1	1	0	0	0	1	0	0	0	0	0	0	0	0	0	0	0	0
Tb09.160.5450	579	25	38	25	28	114	33	54	110	3	3	39	1	8	4	9	9	14	41	18	3
Tb09.160.5460	342	1	0	0	5	29	3	5	16	5	0	0	0	1	0	0	1	1	5	0	0
Tb09.160.5470	321	2	4	0	3	26	7	10	16	2	1	1	0	2	2	1	1	0	5	0	0
Tb09.160.5480	1431	252	168	100	84	460	192	172	248	44	26	46	6	67	58	51	47	52	205	35	16
Tb09.160.5490	2001	234	109	32	36	156	63	14	15	12	18	5	4	74	72	32	36	101	231	11	12
Tb09.160.5500	417	14	18	6	14	44	25	25	46	4	0	2	1	7	11	14	28	6	22	4	3
Tb09.160.5510	471	32	32	15	34	103	58	22	101	0	2	1	2	8	10	8	30	8	19	6	0
Tb09.160.5520	348	12	9	3	4	40	12	16	49	0	0	0	0	0	4	6	6	0	7	1	0
Tb09.160.5530	1523	601	252	341	190	450	340	299	662	12	13	11	6	57	86	145	411	94	222	70	43
Tb09.160.5540	585	8	6	0	2	27	14	20	21	1	2	0	0	1	1	3	2	0	8	2	0
Tb09.160.5550	2732	360	327	89	83	231	194	47	102	9	7	6	4	29	33	24	35	88	100	19	12
Tb09.160.5560	1514	548	401	240	181	432	184	145	346	52	48	59	11	152	134	154	288	243	476	112	35
Tb09.160.5570	1801	355	357	50	70	1512	592	294	314	572	456	260	63	129	152	39	19	365	643	75	35
Tb09.160.5580	1117	4109	2312	3844	2469	8196	2921	10474	12725	5013	3990	13936	4045	6084	7251	3959	2442	4575	17098	8476	4868
Tb09.160.5590	610	4834	2802	4988	3031	9983	3405	11861	14440	5615	4663	16283	4923	7178	8380	4770	3187	5474	20176	10255	6256
Tb09.160.5600	1099	192	198	22	24	140	70	26	59	24	18	8	4	49	54	39	42	76	255	45	10
Tb09.160.5610	240	17	17	1	2	19	7	14	11	7	3	0	0	2	3	0	4	5	18	3	1
Tb09.160.5620	744	271	158	47	44	346	152	68	101	73	55	21	13	80	93	18	24	61	150	28	10
Tb09.160.5630	225	12	17	3	2	44	33	10	7	8	5	4	0	8	10	3	3	16	22	0	2
Tb09.160.5640	6153	584	260	188	124	120	89	66	126	30	25	35	12	97	51	46	135	215	228	49	25
Tb09.160.5650	2637	479	552	59	82	789	291	72	134	211	144	115	15	294	245	32	28	601	1033	69	43
Tb09.160.5660	1090	119	121	19	18	931	324	120	101	281	296	58	16	239	257	40	20	271	1150	51	40
Tb09.160.5670	4182	1397	842	238	187	324	196	92	216	71	45	86	17	233	158	116	323	578	619	109	52
Tb09.211.0010	936	12	10	5	4	19	12	7	19	1	2	0	2	0	2	0	2	1	7	1	0
Tb09.211.0020	873	3	2	2	2	3	2	2	3	0	0	0	0	0	0	1	0	0	0	0	0
Tb09.211.0040	524	108	103	75	66	114	69	93	250	8	0	14	6	7	22	27	26	34	86	46	33
Tb09.211.0050	511	909	797	877	840	2025	686	2452	5272	126	81	208	31	251	315	293	212	274	1371	565	355
Tb09.211.0060	324	70	34	60	53	52	33	136	347	11	6	21	1	16	31	11	4	21	198	59	16
Tb09.211.0070	1698	175	140	34	40	147	55	22	55	43	32	51	10	48	65	10	15	78	210	50	21
Tb09.211.0080	3669	235	154	59	63	219	210	105	152	46	51	73	12	65	51	23	20	173	221	57	24
Tb09.211.0090	1626	258	219	34	48	460	185	50	98	143	102	93	21	158	124	23	11	285	424	41	18
Tb09.211.0100	1829	274	151	97	43	291	247	188	170	131	112	79	30	142	73	42	71	232	229	45	30
Tb09.211.0110	668	4012	977	5216	1084	5396	1747	4826	11075	2082	906	10448	1885	5376	5785	4053	2154	4539	14398	7663	6169
Tb09.211.0120	584	2277	819	3174	871	2256	1083	1833	4732	558	280	2416	538	2314	2525	2612	1602	2072	7009	4137	2897
Tb09.211.0130	584	2228	789	3162	832	2165	990	1670	4225	539	276	2325	533	2274	2443	2507	1568	1992	6814	4049	2834
Tb09.211.0140	1645	588	860	276	251	237	116	59	99	47	17	32	3	76	72	82	67	108	211	69	37
Tb09.211.0150	399	0	15	1	3	111	41	21	50	8	2	12	0	4	8	2	5	1	41	7	3
Tb09.211.0160	2186	869	779	230	240	1219	585	346	719	144	114	64	16	190	183	127	130	355	685	156	92
Tb09.211.0170	943	276	223	48	52	326	129	85	271	58	34	58	12	126	148	92	51	154	609	192	103
Tb09.211.0180	2000	689	375	115	83	86	51	30	60	18	7	39	6	115	95	29	51	100	179	40	16
Tb09.211.0190	1131	191	130	27	37	314	143	18	36	67	37	24	5	107	115	18	14	165	474	24	20
Tb09.211.0200	1608	149	81	33	25	198	90	56	108	12	17	18	3	52	47	29	20	88	179	28	22
Tb09.211.0210	1446	287	264	26	33	800	254	78	103	235	134	38	14	141	129	7	13	220	541	29	17
Tb09.211.0220	1098	302	350	56	75	865	342	343	341	195	167	69	12	167	112	24	27	136	486	67	32
Tb09.211.0230	683	180	167	11	17	139	61	14	22	34	10	19	1	44	51	9	5	89	250	14	8
Tb09.211.0240	354	25	6	1	3	12	8	5	1	6	0	0	0	5	4	1	0	14	35	1	3
Tb09.211.0250	897	26	32	2	7	116	31	15	19	4	1	1	0	8	4	3	1	22	76	2	1
Tb09.211.0260	1710	233	90	43	31	311	119	39	105	36	11	39	4	48	43	8	11	83	189	30	13
Tb09.211.0270	360	13	20	4	4	39	19	6	12	1	3	0	2	4	6	3	8	13	13	0	0
Tb09.211.0290	2167	166	78	57	36	94	52	39	56	11	7	16	8	39	40	19	72	81	80	23	14
Tb09.211.0300	680	132	135	32	33	183	61	59	130	73	48	37	6	66	92	49	37	116	303	132	69
Tb09.211.0310	580	299	341	96	99	616	235	251	268	153	105	56	20	146	151	153	145	217	817	402	173
Tb09.211.0320	2147	538	425	109	97	909	542	342	351	277	267	78	14	378	268	174	159	460	548	105	53
Tb09.211.0330	1601	427	305	96	71	256	278	138	289	67	58	39	10	79	60	24	53	137	220	55	18
Tb09.211.0340	668	3998	987	5229	1075	5418	1727	4781	11005	2077	900	10337	1880	5360	5724	4016	2152	4515	14423	7594	6143
Tb09.211.0350	718	154	87	85	62	366	129	391	617	211	108	198	72	75	98	37	40	248	993	403	261
Tb09.211.0360	573	45	33	29	13	104	51	56	70	73	54	41	10	36	36	7	8	49	248	72	26
Tb09.211.0370	866	140	105	27	14	414	198	60	64	171	135	46	7	106	72	13	10	150	288	25	8
Tb09.211.0380	1082	187	123	34	25	403	154	79	96	122	89	41	10	89	74	12	10	109	202	21	17
Tb09.211.0400	2131	609	432	82	93	655	294	142	373	173	118	95	31	269	274	78	60	492	1071	175	92
Tb09.211.0410	1388	86	30	23	12	67	49	30	33	36	30	18	5	67	100	19	27	61	171	15	15
Tb09.211.0420	282	43	50	3	10	52	23	2	2	18	18	2	2	15	17	2	5	16	37	1	1
Tb09.211.0430	2838	406	480	71	109	401	198	76	152	144	105	87	14	168	106	41	32	282	384	61	27
Tb09.211.0440	700	201	120	18	14	540	193	154	160	203	143	55	14	255	267	109	78	250	688	184	116
Tb09.211.0450	487	214	229	74	86	563	195	191	251	103	68	127	16	218	224	190	97	222	954	406	160
Tb09.211.0460	456	273	250	119	125	722	299	823	911	196	158	363	49	318	330	182	102	423	1527	667	305
Tb09.211.0470	2541	674	449	109	80	403	207	55	106	119	64	56	13	208	110	33	47	405	426	62	22
Tb09.211.0480	3481	247	114	74	40	102	79	40	106	26	28	56	7	51	43	11	42	104	121	27	31
Tb09.211.0485	1646	379	327	140	145	1221	432	1084	1047	317	231	555	85	384	411	275	148	359	1218	460	293
Tb09.211.0490	327	114	122	44	46	364	154	151	187	61	76	11	5	42	40	23	40	54	166	33	13
Tb09.211.0500	1510	835	547	275	156	1427	784	679	980	324	227	98	40	245	241	147	178	459	633	152	96
Tb09.211.0510	894	98	99	7	12	76	48	13	11	52	31	21	9	49	46	3	7	87	152	11	6
Tb09.211.0520	1077	293	245	36	41	686	311	102	118	257	181	60	10	294	349	59	26	301	1028	48	22
Tb09.211.0530	798	199	132	43	36	238	115	98	169	235	116	68	34	234	237	43	50	256	897	152	51
Tb09.211.0540	1143	724	628	386	331	1224	417	943	1516	431	298	450	88	286	267	189	158	694	1400	674	370
Tb09.211.0550	144	1	0	1	5	0	4	0	10	0	0	0	0	0	0	1	4	0	2	0	0
Tb09.211.0560	1023	531	214	657	229	263	338	193	520	8	8	23	4	68	50	48	236	84	214	65	31
Tb09.211.0570	321	21	7	20	6	11	2	7	4	0	0	2	1	0	2	0	2	5	28	5	1
Tb09.211.0580	6975	843	420	447	255	189	143	154	392	34	27	144	35	124	78	83	145	244	253	127	79
Tb09.211.0590	1583	265	281	34	36	520	181	29	63	126	70	42	3	153	157	11	8	173	614	26	18
Tb09.211.0600	1319	391	479	101	124	1318	510	508	769	265	169	259	40	493	501	298	174	498	1334	527	340
Tb09.211.0610	3169	412	265	126	81	127	59	29	93	23	16	25	9	76	66	32	87	114	185	40	21
Tb09.211.0620	1186	3345	2881	1869	1530	2495	829	1351	3785	707	444	1159	239	2551	2878	2953	1863	2382	6659	4026	2268
Tb09.211.0630	2116	3971	3344	2223	1777	3095	1047	1621	4463	838	535	1356	288	2962	3333	3382	2225	2729	7815	4735	2632
Tb09.211.0640	360	6	1	3	2	11	4	20	7	3	5	5	0	8	5	1	3	4	8	2	5
Tb09.211.0650	477	3	0	4	0	14	2	12	6	0	0	0	1	2	1	1	1	1	1	0	0
Tb09.211.0660	300	9	3	5	4	15	5	11	7	0	1	3	3	2	0	3	2	4	2	2	0
Tb09.211.0670	273	8	1	5	5	10	7	7	4	1	0	0	0	0	0	1	0	0	0	0	1
Tb09.211.0680	1381	1890	2018	1336	1209	3424	1303	2352	4943	560	306	699	132	665	785	544	382	614	2163	1066	484
Tb09.211.0690	1103	434	298	205	108	622	344	491	675	292	233	151	51	282	251	112	112	363	602	148	85
Tb09.211.0700	1106	459	332	50	41	411	158	71	149	130	96	45	8	154	160	70	35	240	650	148	58
Tb09.211.0710	1827	473	395	44	52	469	225	97	118	121	66	69	13	158	142	48	44	278	485	62	30
Tb09.211.0720	1152	229	214	15	28	141	73	17	19	36	26	15	3	87	87	10	4	87	185	11	6
Tb09.211.0730	1225	318	362	110	97	961	339	251	332	263	176	135	22	183	159	42	33	352	699	113	61
Tb09.211.0740	664	374	408	163	178	660	306	276	737	159	85	190	39	270	400	262	165	223	1034	451	226
Tb09.211.0750	336	67	73	13	16	89	34	28	77	57	30	35	2	32	72	9	9	28	255	60	9
Tb09.211.0760	813	188	218	41	34	628	239	161	178	174	103	86	19	94	122	22	14	126	531	94	57
Tb09.211.0770	1195	293	393	45	63	320	188	43	49	93	47	27	7	132	132	34	34	180	513	31	13
Tb09.211.0775	1210	439	422	363	283	1300	671	1216	1587	429	322	412	225	249	346	306	361	294	1067	415	247
Tb09.211.0780	339	77	99	15	19	193	102	88	74	112	94	56	21	44	41	8	6	83	230	24	8
Tb09.211.0790	959	205	187	25	27	788	277	141	103	183	182	64	20	127	142	30	16	178	563	41	36
Tb09.211.0800	1281	145	128	21	22	122	67	18	42	34	19	18	2	57	61	22	17	49	192	24	16
Tb09.211.0810	2116	267	294	38	64	398	214	132	166	167	135	117	30	85	62	25	29	176	276	40	24
Tb09.211.0820	1918	338	371	40	68	691	321	83	142	268	203	212	51	142	111	17	23	160	344	52	25
Tb09.211.0830	1807	202	124	30	21	401	158	53	90	118	81	73	15	73	78	13	8	120	324	25	9
Tb09.211.0840	1043	234	280	21	24	209	79	10	47	38	18	42	15	58	88	11	10	99	317	26	18
Tb09.211.0850	2177	606	640	94	101	216	69	31	120	23	16	66	8	140	118	40	21	177	524	43	29
Tb09.211.0860	1455	363	284	46	50	835	341	198	239	169	118	124	24	177	154	27	18	258	669	76	39
Tb09.211.0865	279	602	420	711	386	3053	1309	6504	6851	725	753	3727	620	1351	1402	1025	510	1491	3874	2069	1821
Tb09.211.0870	1701	375	287	49	53	565	219	71	89	157	98	126	36	205	156	21	21	233	613	44	33
Tb09.211.0890	611	165	82	16	20	385	139	50	79	70	33	57	11	115	159	43	30	131	683	42	31
Tb09.211.0900	551	360	418	78	91	437	179	217	379	122	113	98	30	107	148	78	56	173	763	258	107
Tb09.211.0910	1609	193	99	34	28	70	66	22	39	29	22	10	1	35	27	5	13	86	96	16	7
Tb09.211.0920	1722	410	347	39	35	665	214	75	143	110	54	47	1	119	118	20	17	262	532	51	27
Tb09.211.0930	2053	1447	1302	729	581	1229	510	376	1259	69	31	39	12	300	304	186	196	269	604	161	75
Tb09.211.0940	1560	162	57	33	32	81	92	26	48	12	20	13	5	16	30	6	19	39	62	16	7
Tb09.211.0950	2963	567	429	77	75	440	312	55	101	161	131	58	8	227	107	34	46	392	419	37	33
Tb09.211.0960	2229	492	355	204	186	648	362	320	660	80	44	15	12	101	118	142	201	186	325	85	44
Tb09.211.0970	411	7	6	0	4	5	1	5	6	2	0	0	0	1	2	2	2	1	2	4	0
Tb09.211.0980	213	0	0	1	0	0	0	0	1	0	0	0	0	0	0	0	0	0	0	0	0
Tb09.211.0990	924	140	46	60	22	99	72	58	99	12	5	41	3	29	16	22	24	39	50	27	24
Tb09.211.1000	1404	816	1431	264	362	1591	524	450	792	156	97	166	17	332	383	428	268	377	1627	575	335
Tb09.211.1010	1350	870	1570	287	423	1702	576	450	859	143	91	164	14	343	367	447	272	411	1527	543	307
Tb09.211.1020	1332	501	1061	169	275	987	321	263	510	97	65	98	10	199	240	268	167	235	926	335	193
Tb09.211.1030	1134	589	1003	177	231	907	333	305	518	94	48	109	10	207	260	237	147	226	936	378	185
Tb09.211.1040	999	227	245	36	53	249	174	70	100	8	5	11	3	47	66	46	31	63	271	29	15
Tb09.211.1050	923	166	114	13	13	263	146	34	55	94	68	34	3	97	123	11	8	117	411	29	10
Tb09.211.1060	237	25	14	14	9	23	7	9	25	4	6	10	5	6	8	9	24	8	44	7	5
Tb09.211.1070	3145	578	141	472	120	130	150	121	227	22	10	67	17	64	73	49	178	160	194	110	43
Tb09.211.1080	417	6	14	6	19	32	13	22	26	0	1	1	1	2	5	3	9	4	14	3	2
Tb09.211.1090	318	50	38	29	30	114	60	51	94	1	3	2	1	6	12	7	36	5	19	4	1
Tb09.211.1100	435	39	37	34	38	94	65	77	170	1	2	1	1	2	7	7	34	5	14	3	4
Tb09.211.1110	189	8	1	6	5	49	21	22	49	3	3	2	1	4	5	3	6	3	29	9	2
Tb09.211.1120	234	13	4	9	11	59	20	48	68	1	1	2	2	3	4	2	8	3	12	5	2
Tb09.211.1130	1107	454	204	432	135	533	435	320	483	36	30	94	22	87	116	61	140	149	408	130	44
Tb09.211.1140	237	16	15	13	9	36	10	17	14	4	3	10	1	3	4	4	3	3	20	2	3
Tb09.211.1150	751	464	71	273	72	206	94	113	494	13	7	9	3	29	47	58	66	26	118	34	18
Tb09.211.1160	249	137	10	52	22	45	37	34	101	5	2	4	0	8	11	19	22	6	40	15	3
Tb09.211.1170	2038	393	200	92	75	393	282	135	267	70	74	29	10	51	47	8	22	216	296	61	29
Tb09.211.1180	288	32	47	3	5	50	25	18	19	8	8	7	3	9	7	4	4	11	46	3	3
Tb09.211.1190	2369	266	202	43	57	269	226	94	133	59	29	66	19	82	47	42	55	168	253	47	35
Tb09.211.1195	398	44	30	16	7	133	53	46	62	17	10	16	2	29	25	7	8	31	134	28	22
Tb09.211.1210	1355	252	240	19	47	386	136	103	183	186	122	77	13	122	154	38	28	237	615	173	79
Tb09.211.1220	1232	518	668	133	135	1189	393	355	589	385	273	275	51	539	697	356	194	556	2025	749	340
Tb09.211.1230	3373	626	342	114	92	90	39	39	76	15	6	17	2	96	110	71	190	121	219	45	36
Tb09.211.1240	1137	147	96	63	47	261	214	153	199	63	49	43	10	55	51	29	36	102	162	79	42
Tb09.211.1250	923	599	574	144	98	1177	470	488	502	559	437	265	59	614	572	330	191	657	1370	481	269
Tb09.211.1260	333	59	76	3	9	69	29	4	4	60	45	13	3	74	84	3	3	75	273	4	5
Tb09.211.1270	786	121	127	10	17	253	81	21	31	67	70	36	1	123	122	12	7	133	424	22	7
Tb09.211.1280	1400	398	399	46	59	621	220	92	196	114	93	54	9	249	182	58	31	425	843	93	43
Tb09.211.1290	1050	386	375	55	90	1719	612	633	640	613	611	308	70	333	346	82	64	409	1256	187	121
Tb09.211.1300	760	282	358	35	48	1434	544	518	360	622	525	280	76	622	628	213	122	639	2110	426	270
Tb09.211.1310	1211	167	197	34	38	153	80	21	54	51	33	27	10	72	58	19	11	120	140	32	19
Tb09.211.1320	4373	686	408	130	110	456	327	112	157	131	80	97	19	212	170	57	66	395	649	106	72
Tb09.211.1330	1559	328	336	97	67	1220	482	396	336	262	241	175	38	422	416	183	102	387	1319	266	140
Tb09.211.1340	291	73	48	55	28	107	32	75	88	44	19	69	18	28	30	16	16	34	106	33	15
Tb09.211.1350	1132	642	679	209	233	1011	439	589	968	431	256	369	63	584	641	243	165	672	1768	699	323
Tb09.211.1360	537	407	676	447	521	1337	429	980	2033	155	142	648	109	289	315	355	188	373	974	659	371
Tb09.211.1370	2354	681	874	232	240	1151	421	378	616	400	316	354	69	503	573	265	171	648	1543	478	243
Tb09.211.1380	1478	463	475	262	219	882	438	908	1314	184	144	233	23	333	381	330	175	470	1514	742	380
Tb09.211.1390	2177	1354	1604	1114	1341	833	355	382	2507	67	39	68	26	314	432	526	656	370	1235	471	246
Tb09.211.1400	1526	314	368	80	86	213	116	57	141	19	12	33	5	100	107	80	48	125	400	105	48
Tb09.211.1410	411	4	0	1	0	8	3	3	5	1	0	0	0	3	0	0	0	1	3	0	0
Tb09.211.1420	300	8	3	5	4	14	5	11	7	0	1	3	3	2	0	3	2	4	2	2	0
Tb09.211.1430	393	10	2	7	7	15	6	7	8	1	0	0	0	0	0	1	1	0	1	1	2
Tb09.211.1440	381	9	6	3	3	13	7	4	4	2	1	2	0	3	3	1	2	9	14	1	0
Tb09.211.1450	306	4	5	2	3	15	3	3	1	1	2	0	2	3	0	2	1	4	11	0	0
Tb09.211.1460	402	15	11	6	8	29	18	14	16	9	2	13	2	9	7	1	2	22	24	6	3
Tb09.211.1470	990	458	519	277	252	968	398	498	939	116	61	58	9	134	196	150	102	216	662	150	64
Tb09.211.1480	1548	248	96	68	49	274	127	65	94	65	69	33	7	104	111	25	28	135	328	55	12
Tb09.211.1500	1635	271	243	38	49	516	210	43	62	123	78	37	7	241	243	55	43	255	694	66	30
Tb09.211.1510	1439	214	172	22	37	259	110	37	65	63	30	37	8	81	84	13	20	155	229	30	17
Tb09.211.1520	456	51	40	5	6	51	32	21	12	16	25	1	2	10	3	2	7	24	37	6	5
Tb09.211.1530	1052	154	195	28	32	302	175	115	128	54	45	24	7	44	42	8	7	112	175	28	13
Tb09.211.1540	495	152	113	32	39	98	29	22	43	38	18	41	6	90	146	42	27	67	283	40	16
Tb09.211.1550	1679	604	455	473	385	180	107	85	228	29	19	59	18	63	43	19	78	101	153	74	29
Tb09.211.1560	351	70	44	13	9	83	34	19	18	29	12	18	5	16	26	7	2	31	120	12	5
Tb09.211.1570	821	149	84	22	16	181	84	32	41	49	33	47	15	45	47	22	12	89	270	38	24
Tb09.211.1580	1280	157	129	24	36	152	67	28	73	28	24	56	12	45	54	12	8	83	164	29	15
Tb09.211.1590	599	118	98	10	25	78	59	16	33	17	14	27	7	27	25	11	12	35	104	21	8
Tb09.211.1600	948	323	310	95	59	713	379	623	749	211	182	153	32	59	41	6	6	176	306	85	28
Tb09.211.1610	1196	162	183	24	23	684	238	85	70	211	157	97	32	86	71	5	9	127	300	25	15
Tb09.211.1620	4662	1793	1467	631	485	438	302	145	495	96	50	110	19	254	188	136	339	399	472	172	85
Tb09.211.1630	2466	419	397	58	71	391	205	54	129	85	65	51	18	138	96	44	27	315	494	61	32
Tb09.211.1640	1809	414	294	38	48	340	141	60	88	50	29	32	7	96	61	23	21	197	266	38	33
Tb09.211.1650	711	136	133	7	15	77	40	8	25	9	7	18	1	67	70	27	16	72	274	16	9
Tb09.211.1655	372	44	53	6	7	222	84	102	87	77	40	35	8	64	66	17	9	96	301	52	24
Tb09.211.1660	390	38	53	1	9	48	18	6	9	12	12	5	2	12	10	1	1	32	106	4	3
Tb09.211.1670	2121	387	325	44	67	322	157	67	75	64	44	54	9	84	61	13	14	234	353	31	14
Tb09.211.1680	987	220	308	187	147	579	259	307	707	216	211	236	46	240	262	203	171	227	937	364	112
Tb09.211.1690	559	1589	1100	2118	1120	1876	749	1946	5203	661	368	1345	394	535	633	588	494	492	1816	1125	410
Tb09.211.1695	872	169	129	82	88	369	122	324	557	97	104	79	30	47	42	32	36	29	182	38	15
Tb09.211.1710	300	4	5	2	9	29	16	13	30	1	0	0	0	4	1	1	1	0	3	0	1
Tb09.211.1720	378	42	38	14	15	57	34	22	54	1	0	0	0	1	6	2	4	2	9	3	1
Tb09.211.1730	225	12	14	1	4	37	20	7	22	1	2	1	0	4	1	2	1	6	11	3	0
Tb09.211.1740	756	105	63	6	9	783	222	142	111	192	160	39	10	179	181	25	18	227	946	90	55
Tb09.211.1750	1991	1068	541	565	304	1148	523	792	1363	335	260	167	70	271	285	220	201	374	700	297	160
Tb09.211.1760	1507	164	129	27	41	246	113	30	56	68	53	43	7	46	44	8	7	98	297	31	19
Tb09.211.1770	896	239	179	65	65	244	105	62	114	26	20	4	4	55	65	52	60	88	248	47	28
Tb09.211.1780	450	69	68	5	12	96	24	17	17	21	17	11	3	35	27	11	8	41	114	8	11
Tb09.211.1790	1608	354	269	71	65	446	215	131	194	113	81	65	10	200	246	115	85	285	894	158	84
Tb09.211.1800	1512	2809	3190	1203	1255	211	52	101	643	134	100	56	48	198	259	162	248	129	261	67	31
Tb09.211.1810	450	137	178	71	63	652	225	541	623	198	168	230	19	125	127	34	21	149	549	144	86
Tb09.211.1820	6741	1766	1451	575	455	313	203	172	388	68	38	99	32	120	124	69	137	349	534	164	82
Tb09.211.1830	3989	621	468	98	123	140	117	48	102	38	35	43	5	86	65	24	44	263	333	81	43
Tb09.211.1840	441	71	76	3	13	44	15	7	7	14	8	1	1	23	34	8	5	32	158	12	12
Tb09.211.1850	1221	301	334	23	28	250	99	20	52	99	51	21	4	106	154	41	37	242	581	94	69
Tb09.211.1860	432	81	94	9	11	35	19	3	7	2	3	1	0	16	20	8	3	23	91	4	0
Tb09.211.1870	1812	402	333	69	64	181	65	31	103	17	6	26	1	63	60	27	23	84	166	38	15
Tb09.211.1880	1715	377	397	27	42	254	114	32	64	57	23	29	3	106	82	39	14	166	428	40	14
Tb09.211.1890	423	54	97	8	8	101	54	14	21	10	6	12	1	22	14	2	1	20	95	8	6
Tb09.211.1900	1412	102	109	21	21	108	44	30	54	25	24	23	2	32	38	11	10	58	255	29	9
Tb09.211.1910	3331	306	158	101	58	64	44	35	104	6	6	18	12	29	27	41	58	76	89	36	12
Tb09.211.1920	306	10	60	3	7	24	8	2	13	1	1	1	0	6	5	2	3	6	34	5	2
Tb09.211.1930	2181	460	443	137	123	170	80	60	153	19	10	45	6	100	102	72	59	180	305	123	49
Tb09.211.1940	607	215	173	52	50	301	105	82	140	52	28	48	17	65	68	41	34	85	197	44	33
Tb09.211.1950	1108	248	104	135	59	125	76	54	183	40	24	20	14	109	148	185	233	123	161	118	62
Tb09.211.1960	1113	138	177	25	22	256	118	26	31	58	49	36	4	58	55	10	5	115	369	17	9
Tb09.211.1970	546	13	29	10	8	64	23	16	30	7	11	0	0	3	4	4	2	6	24	1	2
Tb09.211.1980	351	21	23	3	12	65	28	19	39	3	0	0	0	4	4	0	3	1	15	0	1
Tb09.211.1990	123	7	16	5	6	30	15	6	14	0	2	0	0	5	3	2	2	1	5	2	0
Tb09.211.2000	123	47	27	6	15	38	9	9	16	2	1	0	0	3	3	0	2	2	12	2	1
Tb09.211.2010	801	204	226	78	64	295	118	77	134	14	11	12	3	34	28	26	32	45	105	16	12
Tb09.211.2020	2355	346	308	106	86	412	266	107	138	62	55	72	12	144	139	76	94	213	395	70	29
Tb09.211.2060	580	163	96	120	101	63	37	44	107	2	1	6	2	6	17	14	17	4	48	9	6
Tb09.211.2070	535	71	94	6	10	224	75	12	16	69	62	22	0	72	83	4	6	81	444	9	6
Tb09.211.2080	1830	443	436	46	62	328	110	26	59	55	27	19	3	167	125	38	36	181	498	35	32
Tb09.211.2090	1083	254	166	33	37	550	234	130	182	209	130	55	10	203	165	22	12	313	599	38	21
Tb09.211.2100	1932	158	81	33	38	154	81	39	62	24	18	7	4	54	49	11	23	75	155	14	8
Tb09.211.2110	1918	250	101	41	34	126	58	31	48	50	27	19	4	82	81	8	15	119	244	27	11
Tb09.211.2120	582	330	271	346	343	473	670	337	794	16	33	10	6	31	41	79	630	68	127	69	27
Tb09.211.2130	423	78	91	57	91	94	132	110	203	5	2	2	4	15	8	15	158	21	29	15	7
Tb09.211.2140	258	89	54	87	57	93	115	105	285	3	9	2	1	8	11	14	72	17	25	14	3
Tb09.211.2150	1969	1759	569	2242	657	857	1288	1009	2441	39	45	26	20	99	91	126	930	352	203	143	96
Tb09.211.2160	1359	492	270	128	77	293	227	145	298	47	36	34	12	74	57	28	78	158	182	54	18
Tb09.211.2170	285	177	102	48	33	62	74	47	87	15	10	15	3	22	18	12	30	59	56	26	4
Tb09.211.2180	1956	329	216	33	54	548	246	42	82	118	91	47	8	210	205	35	17	364	737	41	30
Tb09.211.2190	573	176	172	35	35	414	187	266	381	103	64	93	14	246	271	162	92	190	869	289	197
Tb09.211.2200	1466	211	158	16	26	379	128	37	72	84	67	41	6	106	107	20	6	140	363	30	23
Tb09.211.2205	317	120	118	8	9	292	127	62	78	78	36	31	6	106	112	61	26	110	422	91	60
Tb09.211.2210	192	18	16	1	3	10	10	1	7	7	0	0	0	2	0	0	2	4	15	2	1
Tb09.211.2220	1099	288	196	44	32	240	151	52	111	70	59	35	4	43	42	14	15	85	152	32	14
Tb09.211.2230	1129	285	227	33	39	338	158	64	71	162	121	75	8	211	189	33	16	134	284	31	21
Tb09.211.2250	1101	498	294	207	114	381	150	79	252	76	41	43	10	186	216	167	135	228	688	229	107
Tb09.211.2260	3216	438	367	101	66	394	328	97	177	40	35	69	12	130	85	51	73	236	382	67	32
Tb09.211.2270	339	40	93	30	75	575	240	672	641	65	64	41	13	41	52	50	52	52	292	73	45
Tb09.211.2280	348	2	10	0	3	29	12	8	12	8	3	0	0	3	0	1	2	1	14	0	1
Tb09.211.2290	1441	256	181	62	65	307	184	91	197	22	15	26	9	44	38	43	33	93	158	46	23
Tb09.211.2300	2388	230	178	49	44	122	66	28	32	32	25	46	6	100	92	14	16	107	188	34	27
Tb09.211.2310	1113	123	131	19	32	226	86	37	32	60	36	23	1	66	58	19	8	113	356	45	28
Tb09.211.2320	552	17	20	9	10	67	28	17	28	11	9	11	6	16	7	9	4	22	90	7	8
Tb09.211.2330	1083	261	171	198	101	267	185	218	412	20	11	2	4	57	92	107	237	79	190	70	41
Tb09.211.2340	369	3	9	3	2	88	27	33	61	11	9	3	1	7	5	5	2	4	32	7	0
Tb09.211.2350	249	4	8	0	4	59	21	34	35	1	3	1	1	6	8	4	5	5	25	2	1
Tb09.211.2360	1011	485	324	257	177	669	428	338	496	121	75	66	20	147	137	124	283	220	590	151	53
Tb09.211.2370	1000	128	157	13	20	394	168	39	43	113	86	37	4	57	49	5	3	81	280	18	10
Tb09.211.2380	2264	766	431	787	359	534	493	626	1330	34	21	15	6	55	55	80	270	115	116	36	34
Tb09.211.2390	423	12	3	3	5	24	6	5	6	6	4	0	1	10	9	5	0	15	39	0	0
Tb09.211.2400	2255	98	53	21	28	65	29	30	37	25	12	22	10	65	62	13	19	70	182	39	16
Tb09.211.2410	1044	521	330	344	194	513	374	282	443	90	56	57	22	130	128	125	332	206	516	154	47
Tb09.211.2420	7956	1813	1558	434	399	404	198	237	433	106	110	225	37	192	151	87	139	392	595	161	92
Tb09.211.2430	1975	423	294	62	73	356	111	43	124	95	80	46	8	207	173	51	51	299	695	95	42
Tb09.211.2440	809	185	208	28	16	630	185	52	49	93	71	24	4	131	143	32	20	160	779	55	36
Tb09.211.2450	1434	216	208	43	52	599	234	96	113	166	71	52	7	218	158	43	28	211	427	31	23
Tb09.211.2460	2646	267	370	22	64	1033	446	105	146	47	31	52	8	136	177	50	41	162	683	34	30
Tb09.211.2470	381	17	8	7	8	8	2	11	14	1	1	14	5	1	1	3	3	2	5	13	5
Tb09.211.2480	213	6	5	1	1	5	3	5	15	1	0	6	3	3	3	2	3	0	6	9	5
Tb09.211.2490	465	17	1	6	3	3	5	7	9	1	0	3	3	0	2	1	1	1	1	3	1
Tb09.211.2500	267	1	1	4	1	6	0	1	1	0	0	0	0	0	1	0	1	0	0	0	0
Tb09.211.2510	336	3	0	3	3	5	0	1	1	1	0	1	0	1	0	0	0	2	0	1	0
Tb09.211.2520	321	4	1	7	3	6	0	7	4	0	1	2	1	2	0	0	0	0	0	2	0
Tb09.211.2530	1111	181	214	24	52	384	131	86	142	149	82	116	28	170	174	46	62	184	515	190	85
Tb09.211.2540	426	340	457	161	237	1258	457	1304	1575	311	271	420	120	279	334	268	190	219	1425	586	314
Tb09.211.2550	1344	346	382	39	60	168	100	43	81	25	25	44	5	166	193	72	86	116	408	64	24
Tb09.211.2560	1048	269	469	30	48	640	235	59	63	153	106	43	9	291	354	117	60	222	1170	96	59
Tb09.211.2570	1788	1821	1620	1863	1282	551	396	290	1207	135	87	105	61	524	466	541	1103	565	644	352	181
Tb09.211.2580	1167	181	48	18	25	562	196	56	35	174	104	45	7	275	298	61	39	264	1127	79	53
Tb09.211.2590	822	517	364	294	173	639	257	647	971	263	121	264	42	473	473	302	237	394	991	475	239
Tb09.211.2600	1816	299	375	51	89	1035	414	331	269	274	227	144	38	225	235	59	33	321	1301	187	102
Tb09.211.2610	1074	155	180	12	20	166	74	25	35	74	52	26	6	85	73	16	7	151	195	20	12
Tb09.211.2620	588	127	120	22	25	415	161	46	52	212	158	134	41	294	310	112	60	194	743	83	81
Tb09.211.2630	435	3263	3130	3463	3677	12778	5654	21270	25655	6563	5027	22126	4680	5412	7870	4277	2423	4535	18503	8874	3666
Tb09.211.2640	435	3166	3247	3541	3769	13178	5760	21746	25523	6408	4986	22188	4656	5459	7794	4341	2420	4520	18269	8933	3745
Tb09.211.2650	445	4318	3287	5426	3246	12307	4678	21159	26289	6717	4844	20982	4591	7730	7934	4011	2861	5082	19438	7607	4997
Tb09.211.2660	2313	487	481	78	78	436	151	43	120	91	41	81	10	265	169	46	29	374	587	85	46
Tb09.211.2670	1205	174	149	30	22	748	251	95	72	200	155	39	6	154	130	16	20	291	583	24	29
Tb09.211.2680	2007	132	59	32	32	339	178	59	86	102	101	69	20	85	74	19	8	173	240	40	25
Tb09.211.2690	312	13	5	7	2	47	14	7	3	16	9	1	4	10	9	1	2	15	36	2	1
Tb09.211.2700	1660	471	280	241	168	108	57	38	245	21	17	13	11	74	95	119	207	144	213	148	81
Tb09.211.2710	390	27	43	16	12	33	16	14	24	10	4	4	0	9	13	8	19	22	50	24	6
Tb09.211.2720	1059	203	289	32	41	544	195	38	49	179	159	58	25	219	240	35	25	237	833	64	30
Tb09.211.2730	762	1294	1505	1663	1428	7522	2651	11173	17457	1649	1155	3322	730	862	967	993	629	3810	10900	5985	3218
Tb09.211.2740	2691	1504	1738	1963	1676	9087	3146	12567	19570	1784	1312	3418	829	1084	1129	1306	887	4738	13141	7190	4231
Tb09.211.2750	836	222	322	79	89	798	301	355	406	110	76	43	17	111	112	67	54	185	421	71	53
Tb09.211.2770	237	43	78	10	19	111	63	110	114	52	37	79	16	37	33	22	14	37	134	24	13
Tb09.211.2780	898	197	250	23	20	786	261	71	60	153	91	22	11	190	221	134	104	209	1020	110	77
Tb09.211.2790	3831	592	550	154	145	253	237	107	216	80	80	122	16	148	72	55	51	361	374	105	37
Tb09.211.2800	2009	239	170	48	40	165	101	60	97	50	39	52	10	55	35	18	11	116	162	30	18
Tb09.211.2810	762	171	180	23	17	394	169	51	46	203	134	29	12	236	316	72	40	241	895	48	26
Tb09.211.2820	348	48	46	25	23	34	24	37	64	11	9	3	1	20	34	16	21	21	73	38	7
Tb09.211.2830	996	405	306	224	148	667	280	324	544	98	62	19	8	137	150	154	137	166	454	217	102
Tb09.211.2840	258	7	2	3	6	37	17	24	45	4	3	1	1	11	1	4	4	4	24	2	3
Tb09.211.2850	824	139	185	28	46	589	237	202	183	212	130	92	19	73	58	19	9	127	405	61	42
Tb09.211.2860	951	193	249	23	35	552	274	151	136	205	192	34	16	63	71	15	10	124	336	29	9
Tb09.211.2870	2294	132	160	40	35	399	205	113	130	134	100	81	17	87	61	23	20	136	267	45	20
Tb09.211.2880	3097	529	478	110	107	344	192	69	151	45	21	55	13	92	82	36	46	201	328	62	30
Tb09.211.2890	357	43	104	2	9	72	22	9	13	11	7	2	1	10	5	0	2	18	44	6	1
Tb09.211.2900	1560	982	1082	118	169	2499	927	446	509	651	526	289	50	702	657	90	62	1043	2957	355	219
Tb09.211.2910	1560	972	1090	119	161	2571	915	440	501	625	523	286	51	691	651	94	57	1055	2898	334	199
Tb09.211.2920	1538	310	422	42	50	822	313	141	148	191	154	58	16	238	224	73	35	244	658	59	64
Tb09.211.2940	1041	93	162	16	25	132	58	37	46	20	16	31	1	36	53	31	16	32	116	26	15
Tb09.211.2950	2728	360	278	87	73	205	83	42	83	32	10	33	6	110	72	45	59	131	211	63	25
Tb09.211.2960	674	263	301	30	36	113	49	24	18	20	13	16	4	109	134	27	22	61	200	23	8
Tb09.211.2970	3992	794	632	346	280	142	61	43	91	17	18	11	5	57	31	33	148	130	227	48	28
Tb09.211.2980	387	8	26	3	3	17	3	9	5	2	3	3	0	3	7	2	3	7	31	2	6
Tb09.211.2990	1792	241	228	41	53	274	132	283	212	71	55	45	24	82	112	20	34	96	436	75	39
Tb09.211.3000	1594	368	276	30	27	211	104	28	66	77	45	37	11	130	170	24	20	191	381	27	17
Tb09.211.3010	3062	364	162	87	67	154	93	29	94	23	13	21	2	88	38	28	28	131	194	26	21
Tb09.211.3020	1716	196	176	31	40	182	94	18	49	62	25	37	4	73	73	15	3	134	308	19	15
Tb09.211.3030	1457	353	482	32	50	357	167	58	135	73	36	34	13	127	120	43	33	152	350	53	30
Tb09.211.3040	2393	158	73	43	38	235	119	51	104	37	17	68	5	41	43	13	15	123	185	39	21
Tb09.211.3050	682	181	195	132	137	517	142	341	573	114	97	77	21	56	83	59	40	104	372	175	65
Tb09.211.3060	462	79	168	65	123	928	280	584	903	138	149	86	31	55	69	61	53	75	391	159	68
Tb09.211.3070	1986	323	356	44	75	618	245	57	122	115	80	57	4	112	108	17	15	183	507	48	26
Tb09.211.3080	1707	144	105	23	35	321	133	42	42	72	51	40	7	120	120	18	5	166	403	43	20
Tb09.211.3090	330	16	9	4	0	12	8	2	7	9	5	1	0	5	6	1	1	10	16	1	1
Tb09.211.3110	1236	485	787	144	228	543	223	86	172	87	60	31	14	109	129	65	57	79	317	33	18
Tb09.211.3120	609	131	155	21	28	468	236	255	321	86	63	62	9	71	88	44	21	132	587	121	69
Tb09.211.3130	1765	140	63	25	24	146	119	57	105	22	28	29	9	43	33	14	24	95	129	26	19
Tb09.211.3140	3397	616	246	163	88	146	117	37	103	12	16	25	9	68	52	42	92	210	233	54	32
Tb09.211.3150	926	98	81	13	20	376	174	55	58	112	84	21	10	78	82	37	26	99	259	42	31
Tb09.211.3160	6324	675	397	213	171	306	128	116	237	51	33	140	24	150	128	61	100	281	487	140	84
Tb09.211.3170	1312	126	112	12	17	272	86	29	49	109	70	43	9	76	75	11	6	139	314	22	12
Tb09.211.3180	1619	768	735	514	432	1297	750	1295	2220	285	174	187	80	204	181	161	220	427	778	293	133
Tb09.211.3190	156	16	25	3	9	72	41	37	70	2	2	0	0	2	3	0	2	2	13	3	1
Tb09.211.3200	1277	271	358	22	36	218	100	60	107	32	19	17	3	71	65	21	14	94	253	31	11
Tb09.211.3210	867	213	218	23	34	304	187	39	56	64	39	44	2	137	150	50	24	204	698	67	48
Tb09.211.3230	1797	238	180	19	56	506	311	162	179	173	167	42	11	95	91	17	14	229	430	39	21
Tb09.211.3240	876	345	203	208	129	538	210	160	404	19	8	19	5	43	73	54	92	72	241	43	22
Tb09.211.3250	636	9	12	3	14	99	20	30	63	0	4	0	0	1	5	4	8	8	18	0	0
Tb09.211.3260	510	31	37	12	25	161	62	43	91	8	10	1	3	8	10	18	29	10	38	2	3
Tb09.211.3270	630	4556	4429	5306	4563	6931	3181	9637	15242	2527	1389	11001	2021	5093	5126	4328	2493	3739	13704	6833	4146
Tb09.211.3280	588	5375	5041	6258	5219	8441	3874	11526	18324	3172	1847	13701	2568	6256	6481	5336	3162	4682	18184	9272	5102
Tb09.211.3290	606	22	21	10	8	38	24	14	12	26	23	9	4	42	47	0	7	26	183	8	2
Tb09.211.3300	889	419	594	212	205	346	197	148	445	66	41	48	8	233	273	336	342	325	888	494	267
Tb09.211.3310	1413	341	334	66	70	583	227	203	365	146	70	41	9	178	160	87	56	207	552	102	54
Tb09.211.3320	2598	508	232	70	69	86	40	35	75	15	2	15	7	40	32	45	81	72	75	32	16
Tb09.211.3330	1338	704	667	367	294	423	199	173	275	54	32	66	10	65	92	121	136	169	359	119	53
Tb09.211.3340	690	180	197	49	53	373	173	109	140	89	88	35	7	129	180	78	39	162	477	95	55
Tb09.211.3350	2244	542	334	189	114	489	253	112	231	24	21	27	4	70	70	65	98	154	244	75	31
Tb09.211.3360	387	9	16	7	6	42	13	8	13	4	1	1	1	5	2	0	5	4	13	0	2
Tb09.211.3370	1683	402	352	295	264	187	129	73	284	7	5	11	9	17	23	23	49	56	116	30	9
Tb09.211.3380	372	18	22	7	26	20	11	8	11	2	2	2	2	4	1	1	5	5	46	8	1
Tb09.211.3390	1498	315	329	39	45	765	290	90	106	118	85	49	9	232	214	156	148	256	790	91	50
Tb09.211.3400	770	177	211	39	57	359	177	111	143	32	27	11	5	34	52	51	61	73	233	55	30
Tb09.211.3410	4440	484	365	159	144	109	78	78	132	9	10	29	5	31	12	16	39	48	60	22	8
Tb09.211.3420	1624	121	199	11	31	229	91	35	31	11	13	3	2	61	67	84	69	59	384	81	31
Tb09.211.3430	779	51	38	9	13	163	66	18	28	44	18	23	4	29	33	4	1	81	360	10	11
Tb09.211.3440	1273	319	131	40	30	312	151	70	83	66	58	29	12	99	114	103	101	119	320	44	28
Tb09.211.3450	561	35	45	1	3	75	33	11	10	6	8	1	2	16	29	16	11	24	56	3	2
Tb09.211.3460	1060	193	219	16	25	276	126	19	43	47	46	16	4	111	147	43	34	141	501	29	17
Tb09.211.3470	1156	158	123	18	23	357	122	101	105	100	42	31	2	72	143	35	19	121	454	60	25
Tb09.211.3490	3951	351	284	66	79	171	91	47	103	20	10	18	8	61	51	41	36	146	217	41	28
Tb09.211.3500	1714	148	166	29	53	108	33	42	65	2	4	30	2	23	33	24	30	43	114	41	20
Tb09.211.3510	2278	1230	500	1096	459	184	220	121	381	6	15	9	7	43	49	60	445	143	125	52	38
Tb09.211.3520	213	264	58	160	71	21	39	10	40	1	5	0	2	15	11	5	110	22	35	14	5
Tb09.211.3530	1766	212	231	48	53	137	46	72	142	41	17	109	18	64	52	32	18	71	190	46	29
Tb09.211.3540	1539	5713	2868	6079	2775	14565	5732	16480	26138	3503	2700	4361	1344	2187	1706	2181	2735	13601	17672	12005	5964
Tb09.211.3550	1539	6034	3072	6464	2961	15414	6133	17785	28071	3775	2884	4662	1426	2360	1800	2371	3008	14754	18992	13046	6491
Tb09.211.3560	1539	5639	2897	6004	2803	15061	5734	16515	26252	3619	2741	4359	1304	2215	1684	2174	2766	13549	18044	12285	5919
Tb09.211.3570	1539	5633	2859	6105	2721	14332	5595	16360	25966	3624	2693	4393	1262	2198	1701	2144	2621	13299	17843	12121	5724
Tb09.211.3590	1539	6020	3103	6524	2967	16334	6209	17777	28094	3889	2922	4674	1382	2359	1805	2314	2915	14421	19253	13087	6264
Tb09.211.3610	3760	4971	5260	5908	4989	1428	707	662	4838	96	55	238	75	779	822	1248	2770	1027	2560	1006	348
Tb09.211.3620	1376	223	191	26	26	594	209	67	66	158	134	39	7	91	133	14	11	139	477	35	19
Tb09.211.3630	830	80	72	8	9	276	104	39	51	46	47	10	5	36	60	22	15	79	167	20	8
Tb09.211.3640	738	56	96	8	10	226	74	22	17	24	12	13	2	13	23	4	3	42	150	22	9
Tb09.211.3650	1458	312	324	217	186	285	134	93	221	24	23	42	6	70	78	76	95	86	191	70	30
Tb09.211.3660	1585	217	270	22	45	622	284	85	99	147	148	33	4	98	71	18	11	179	377	28	14
Tb09.211.3670	1196	198	112	17	29	265	101	21	47	84	49	22	8	95	80	10	8	142	366	20	13
Tb09.211.3680	1795	325	206	54	50	261	159	57	131	28	20	18	3	56	52	26	47	93	111	26	15
Tb09.211.3690	1334	172	223	15	23	320	124	45	57	40	30	20	2	60	76	7	4	92	284	24	15
Tb09.211.3700	1138	180	98	46	19	139	78	28	57	9	7	12	0	25	18	19	15	52	94	27	15
Tb09.211.3710	249	24	16	4	5	5	2	3	2	0	0	4	0	1	2	0	0	3	9	4	3
Tb09.211.3720	3238	765	917	105	131	180	74	66	133	29	11	77	12	95	105	32	31	191	336	70	37
Tb09.211.3730	3438	500	322	76	77	256	125	48	116	47	33	83	19	130	77	33	19	223	314	47	37
Tb09.211.3740	2461	302	282	108	99	345	188	190	316	38	26	58	9	63	64	42	70	141	269	76	32
Tb09.211.3750	3387	537	423	85	95	241	167	47	107	25	22	18	11	78	60	42	44	178	325	45	19
Tb09.211.3760	1754	174	313	27	37	209	102	22	53	40	33	23	7	68	62	8	12	90	337	29	12
Tb09.211.3770	442	180	197	59	56	661	241	383	480	111	114	45	16	90	85	48	40	146	608	245	102
Tb09.211.3780	1761	203	99	90	57	211	92	51	157	14	14	36	4	36	48	35	31	81	178	43	25
Tb09.211.3790	333	2	5	2	6	9	8	6	13	0	0	0	0	0	3	0	0	5	12	2	0
Tb09.211.3800	1948	344	258	34	43	480	243	63	93	109	110	33	5	105	77	13	8	252	351	28	17
Tb09.211.3810	442	113	128	8	11	401	144	55	43	77	50	20	4	78	103	29	29	88	519	77	49
Tb09.211.3820	2109	334	240	32	53	311	136	29	71	61	29	29	8	197	204	64	52	233	619	44	38
Tb09.211.3830	640	130	110	10	10	80	38	10	12	14	4	4	1	43	73	27	23	44	185	28	21
Tb09.211.3840	1816	136	86	18	24	148	103	22	47	35	12	24	6	74	88	23	30	138	260	26	20
Tb09.211.3850	1359	302	319	31	32	871	376	160	160	306	232	60	9	192	154	18	14	387	873	72	45
Tb09.211.3860	1285	339	330	95	72	345	99	78	220	116	54	92	12	114	92	22	17	170	403	46	37
Tb09.211.3870	2157	422	492	104	134	363	179	87	245	15	9	30	6	50	75	85	113	122	330	65	38
Tb09.211.3880	1769	735	952	290	330	1151	458	604	1163	340	238	207	81	242	212	254	252	397	1018	390	231
Tb09.211.3890	4046	723	621	197	173	225	129	56	161	36	18	50	12	150	97	36	86	227	349	69	42
Tb09.211.3900	1905	487	538	46	66	660	259	62	108	118	67	30	12	157	114	20	25	299	492	30	23
Tb09.211.3910	1146	239	157	32	17	171	77	35	38	21	19	23	3	53	70	13	13	89	266	18	10
Tb09.211.3920	978	230	284	22	27	227	101	18	36	61	36	11	4	89	111	42	36	141	407	34	28
Tb09.211.3930	1338	174	116	45	48	118	69	32	55	40	18	16	2	26	16	5	5	63	88	16	12
Tb09.211.3940	3743	601	433	128	106	174	136	43	85	27	35	29	9	90	62	17	20	217	207	28	28
Tb09.211.3950	1756	510	518	35	66	612	277	47	89	72	38	27	5	159	209	188	117	222	473	78	39
Tb09.211.3955	461	575	870	999	980	3022	1376	4719	6246	109	80	42	26	168	261	345	420	230	1037	378	172
Tb09.211.3960	372	268	339	321	384	2469	1140	3276	4146	46	52	25	13	77	102	130	270	95	339	151	100
Tb09.211.3970	596	223	163	123	89	893	442	1195	1223	423	316	478	108	250	298	132	106	358	815	354	162
Tb09.211.3980	1420	271	170	73	56	193	115	84	171	50	36	28	16	61	44	27	45	115	186	55	39
Tb09.211.3990	759	122	132	14	18	406	177	36	41	135	120	36	5	109	146	8	6	159	631	18	7
Tb09.211.4000	1901	270	172	54	43	163	70	27	59	35	17	12	3	58	38	16	6	68	141	18	15
Tb09.211.4010	2019	439	236	58	59	360	182	37	71	67	46	28	4	122	109	21	34	166	327	31	19
Tb09.211.4020	1063	239	169	38	42	543	168	140	225	77	47	40	4	111	91	39	19	110	350	71	41
Tb09.211.4030	522	7	9	1	7	41	6	21	28	12	4	13	3	8	4	1	2	3	16	3	2
Tb09.211.4040	138	1	1	0	2	0	1	6	8	0	1	1	0	0	0	0	0	0	1	2	3
Tb09.211.4050	315	7	3	1	3	16	5	3	13	2	2	1	1	2	4	1	2	0	6	4	0
Tb09.211.4060	348	2	4	2	2	8	3	2	5	4	2	3	4	2	2	1	0	3	13	0	1
Tb09.211.4070	614	46	49	12	13	78	34	20	27	15	9	8	4	14	18	9	12	11	63	19	5
Tb09.211.4080	381	9	4	1	0	21	14	10	13	5	8	2	0	2	10	0	2	4	10	2	0
Tb09.211.4090	591	34	25	11	6	44	27	17	20	29	38	13	3	11	8	5	2	20	29	15	3
Tb09.211.4100	625	143	51	11	16	183	110	47	34	76	74	24	4	57	53	18	18	96	170	28	19
Tb09.211.4110	2094	439	430	70	67	605	340	139	159	221	155	68	17	119	119	13	14	203	369	50	23
Tb09.211.4120	1290	152	98	16	22	209	98	19	37	83	54	21	6	48	49	8	9	59	169	18	3
Tb09.211.4130	1023	137	125	17	19	298	126	31	46	131	92	28	4	85	113	8	8	161	461	11	8
Tb09.211.4150	1581	142	55	21	25	177	130	26	35	95	67	26	14	80	60	11	7	158	168	8	9
Tb09.211.4155	315	63	64	15	14	142	66	33	23	45	26	51	11	64	55	22	17	70	296	44	34
Tb09.211.4170	1633	394	353	83	98	873	422	416	475	136	115	116	30	158	163	66	77	268	577	103	57
Tb09.211.4180	3690	444	319	62	63	140	64	33	50	31	18	33	15	81	79	23	33	135	231	29	20
Tb09.211.4190	1298	227	122	28	23	181	56	31	50	24	20	10	3	67	66	16	8	55	179	16	12
Tb09.211.4200	1088	216	254	33	39	199	96	36	63	36	28	36	8	98	134	29	28	111	327	37	22
Tb09.211.4210	5739	1517	1310	589	636	305	171	144	439	29	15	49	18	169	142	157	461	334	517	138	68
Tb09.211.4220	363	142	219	126	195	178	104	66	206	10	11	12	2	35	30	44	93	46	104	41	15
Tb09.211.4240	1566	974	676	861	575	288	212	191	664	57	34	23	12	160	152	240	614	248	278	117	63
Tb09.211.4250	192	2	11	3	5	37	17	23	11	0	2	1	0	0	4	1	4	0	8	2	0
Tb09.211.4260	537	1	6	2	3	22	3	8	18	1	1	0	0	3	0	0	3	1	5	1	0
Tb09.211.4270	1872	579	561	230	191	491	307	304	392	44	67	24	11	89	58	64	129	117	158	51	21
Tb09.211.4280	4924	952	515	410	251	96	63	47	145	9	9	30	6	103	72	59	194	215	250	81	41
Tb09.211.4290	816	117	96	11	13	209	115	52	49	125	70	29	3	98	116	46	40	101	358	58	33
Tb09.211.4300	2524	427	329	60	69	289	184	59	110	63	38	53	12	145	101	35	33	319	501	38	27
Tb09.211.4320	504	63	45	11	12	260	101	44	48	59	65	27	5	38	47	3	5	37	152	13	8
Tb09.211.4330	1605	494	559	50	70	372	181	49	81	116	87	46	6	109	97	33	32	221	336	49	29
Tb09.211.4340	309	25	42	8	14	87	43	40	61	4	5	5	2	9	6	5	12	14	30	7	1
Tb09.211.4350	2585	694	709	247	273	700	372	369	745	75	56	90	16	131	148	124	156	215	578	191	64
Tb09.211.4360	2820	706	671	169	143	812	504	198	317	150	87	90	24	244	130	37	48	363	336	58	30
Tb09.211.4370	519	81	64	14	13	248	133	28	28	80	43	17	2	70	104	6	10	96	333	18	11
Tb09.211.4380	1202	106	70	13	21	291	123	64	58	66	48	23	5	100	94	17	11	138	287	28	20
Tb09.211.4390	2655	234	174	48	62	193	101	62	120	32	20	40	7	61	46	15	19	76	125	46	19
Tb09.211.4400	1546	265	227	39	47	184	81	44	71	26	13	34	5	27	30	10	9	60	104	29	20
Tb09.211.4410	372	16	14	4	3	38	14	9	5	3	4	5	0	1	2	0	2	3	25	4	0
Tb09.211.4420	318	18	19	7	15	44	23	11	11	1	1	0	1	5	7	4	15	7	29	5	2
Tb09.211.4430	4483	525	223	222	124	127	124	54	100	12	10	14	15	91	78	60	306	190	252	104	25
Tb09.211.4440	6126	912	776	256	309	215	147	99	280	40	37	63	19	109	82	76	170	407	494	128	75
Tb09.211.4450	1160	356	308	52	54	907	377	442	323	359	287	207	45	168	182	25	28	323	756	86	44
Tb09.211.4460	584	2205	2432	1193	1212	3576	1900	3275	4414	616	484	1396	230	1750	2040	1938	1408	1535	7745	3710	1707
Tb09.211.4470	648	2187	2434	1152	1154	3515	1851	3187	4166	636	472	1318	228	1710	1931	1863	1349	1470	7415	3486	1693
Tb09.211.4480	620	2518	2851	1297	1407	4161	2170	3706	4745	743	535	1521	265	1972	2206	2163	1570	1676	8515	4023	1907
Tb09.211.4490	1097	2302	2545	1191	1196	3616	1930	3305	4405	674	504	1396	239	1798	2025	1924	1381	1537	7801	3612	1757
Tb09.211.4500	938	271	319	28	49	442	189	45	73	110	72	46	7	235	280	162	85	247	861	71	45
Tb09.211.4510	1034	220	109	26	29	358	149	37	41	126	81	36	7	211	215	47	33	250	820	52	24
Tb09.211.4511	328	3061	4024	4220	4687	5302	2954	8436	17111	1315	661	4753	661	2419	3293	3061	1940	1671	11149	4744	2101
Tb09.211.4512	328	3831	4591	5240	5375	7373	3865	11413	23112	1597	772	5916	711	3150	4354	3637	2270	2008	14125	5798	2471
Tb09.211.4513	328	3624	4424	5086	5189	6990	3706	10746	22138	1508	722	5542	671	2928	4126	3426	2133	1883	13429	5543	2268
Tb09.211.4520	1783	283	225	37	36	772	341	147	179	463	393	107	29	409	386	64	39	443	1213	97	31
Tb09.211.4530	360	46	42	18	16	188	74	80	88	192	178	40	20	63	75	21	23	64	254	60	12
Tb09.211.4540	1774	354	210	308	134	545	397	561	826	40	31	32	3	57	62	77	203	95	210	50	28
Tb09.211.4550	660	1023	864	1155	739	1348	680	1812	3353	1180	558	4349	1068	1411	1696	978	772	1252	4145	2061	1282
Tb09.211.4560	2283	390	296	54	59	364	238	65	102	96	78	41	11	144	72	22	29	250	211	31	24
Tb09.211.4570	1281	192	98	26	30	284	129	75	98	54	51	39	7	29	35	11	12	108	158	24	14
Tb09.211.4580	1575	241	137	62	32	165	125	56	81	76	63	39	11	70	34	23	25	137	141	26	22
Tb09.211.4590	294	12	15	0	3	24	13	8	8	10	8	1	1	18	11	1	1	15	93	1	1
Tb09.211.4600	1505	328	219	44	56	533	303	88	101	217	159	58	17	387	273	43	33	463	720	58	28
Tb09.211.4610	1135	324	499	118	176	735	344	259	352	44	35	19	6	83	101	121	123	128	520	91	64
Tb09.211.4620	426	5	13	2	10	132	40	27	30	28	31	7	9	25	30	17	14	30	157	32	5
Tb09.211.4630	982	131	66	29	20	436	186	159	126	88	63	51	12	132	157	86	63	140	597	144	63
Tb09.211.4660	450	12	10	3	9	62	26	28	41	7	3	1	0	3	6	1	3	5	19	1	1
Tb09.211.4670	2153	331	114	88	62	361	208	180	245	48	34	20	3	31	38	23	36	68	99	23	14
Tb09.211.4680	1749	527	398	132	128	564	304	190	298	123	94	28	14	137	105	60	89	189	304	73	25
Tb09.211.4690	1131	170	152	19	19	295	128	93	101	136	123	30	16	85	121	20	17	117	347	71	23
Tb09.211.4700	1071	404	158	85	37	671	280	135	217	111	67	38	7	140	137	95	96	196	430	95	51
Tb09.211.4710	1968	226	202	37	44	523	209	63	115	170	127	63	13	174	125	11	26	281	458	28	17
Tb09.211.4720	1188	250	265	18	38	622	231	59	67	239	196	54	13	286	370	56	22	416	1272	58	24
Tb09.211.4730	4081	282	220	132	126	165	159	149	192	49	47	109	27	63	54	37	52	154	191	76	33
Tb09.211.4740	1275	69	41	14	15	133	75	23	33	56	55	26	2	38	27	9	10	55	120	13	9
Tb09.211.4750	381	29	20	8	7	45	21	21	14	10	14	2	1	31	20	13	21	35	88	25	8
Tb09.211.4760	1817	462	144	82	41	247	173	122	127	99	85	33	9	168	136	63	105	329	631	155	72
Tb09.211.4770	721	109	76	16	7	181	124	48	76	63	53	29	4	54	41	7	8	104	191	37	12
Tb09.211.4780	2386	817	792	227	190	1089	663	342	455	296	281	141	31	392	233	159	199	779	860	163	103
Tb09.211.4790	303	42	45	5	6	24	49	16	19	16	18	5	1	16	11	2	6	23	51	1	0
Tb09.211.4800	2508	306	308	59	81	495	365	107	123	129	127	69	18	113	77	24	25	333	302	55	36
Tb09.211.4810	5127	962	859	195	228	258	212	137	260	93	78	111	25	194	130	63	134	413	443	67	48
Tb09.211.4820	1442	197	115	122	56	455	320	290	422	248	201	150	59	192	158	108	151	380	443	166	114
Tb09.211.4830	2087	201	86	47	22	83	34	45	47	35	22	26	8	53	30	19	28	77	75	34	19
Tb09.211.4840	2532	697	377	72	63	852	489	185	210	312	208	68	14	280	182	83	100	577	710	85	61
Tb09.211.4850	450	2693	1263	3607	1213	2902	1011	3153	6893	1070	544	5587	989	4015	3907	2002	1067	2617	6250	3445	2997
Tb09.211.4860	1191	206	208	51	48	240	188	99	91	81	82	27	23	93	44	27	29	159	139	30	25
Tb09.211.4870	1102	171	202	34	28	285	143	49	57	134	99	65	5	163	164	11	8	124	276	26	21
Tb09.211.4880	1340	231	226	35	31	322	151	54	70	125	122	66	22	120	94	15	8	218	436	28	27
Tb09.211.4890	1050	385	424	110	107	650	216	143	283	125	68	101	11	336	332	274	185	509	1249	384	180
Tb09.211.4900	806	200	220	29	46	365	123	45	55	116	78	62	20	210	173	27	19	195	613	34	19
Tb09.211.4910	3541	737	792	120	150	457	196	98	239	63	29	68	7	188	134	44	60	332	701	101	49
Tb09.211.4920	1194	491	717	319	426	2062	795	1983	2305	149	106	215	35	272	424	387	390	262	1721	575	297
Tb09.211.4930	396	21	33	3	13	77	20	27	46	5	0	11	1	13	16	4	10	23	81	21	9
Tb09.211.4940	525	219	154	83	88	318	212	142	215	86	83	92	19	90	100	50	46	171	333	72	36
Tb09.211.4950	564	44	38	17	24	29	14	21	51	6	6	11	2	9	11	5	5	9	41	16	8
Tb09.211.4960	4353	696	941	317	504	279	98	163	256	9	20	48	25	42	56	58	82	49	192	74	38
Tb09.211.4970	426	97	123	29	48	343	165	227	400	11	4	2	0	4	9	5	11	11	33	3	3
Tb09.211.4980	3795	364	548	111	205	1017	525	665	1004	40	31	33	9	33	53	25	44	56	236	44	23
Tb09.211.4990	2424	139	182	86	111	318	163	241	291	30	16	37	6	42	47	34	31	43	160	38	22
Tb09.211.5000	339	11	14	10	5	20	6	15	13	2	2	7	1	6	3	3	1	12	13	4	0
Tb09.211.5010	3351	723	312	391	297	670	294	352	482	259	201	156	81	96	92	79	179	61	414	105	63
Tb09.211.5015	1911	234	100	185	141	190	87	148	159	43	31	35	19	42	32	26	52	47	66	37	16
Tb09.244.0005	337	0	1	0	0	4	0	1	1	0	0	0	0	0	0	0	1	0	0	0	0
Tb09.244.0020	1595	3	5	7	5	19	3	4	14	2	2	1	2	0	0	2	5	0	2	1	0
Tb09.244.0030	1570	10	0	4	10	17	5	10	11	0	2	0	4	0	0	0	5	0	2	2	0
Tb09.244.0040	354	2	2	2	2	2	3	2	0	0	0	0	0	0	0	0	0	0	0	0	0
Tb09.244.0050	1494	6	2	4	5	12	2	3	5	0	1	0	1	0	0	0	0	0	0	0	0
Tb09.244.0060	1426	5	1	4	3	10	3	5	4	0	1	0	1	0	1	1	2	0	1	2	0
Tb09.244.0080	1295	9	3	4	6	27	8	11	7	2	3	3	6	0	1	2	5	0	3	1	1
Tb09.244.0090	1587	15	1	6	4	9	0	13	5	1	2	0	6	0	0	0	4	0	1	3	0
Tb09.244.0110	1525	6	1	3	8	3	2	5	4	0	0	0	0	0	0	0	1	0	0	0	0
Tb09.244.0120	1455	4	0	2	2	6	2	4	6	0	2	0	0	0	0	0	3	0	0	0	0
Tb09.244.0130	1465	6	1	4	4	8	2	3	9	0	3	0	0	0	1	0	3	0	2	0	0
Tb09.244.0140	1619	9	5	4	10	5	7	6	5	1	3	0	3	0	0	1	3	1	0	2	0
Tb09.244.0150	1587	3	2	2	3	7	2	4	6	0	1	0	1	0	0	0	1	0	0	0	0
Tb09.244.0170	1292	2	1	2	2	5	3	2	2	0	0	0	1	0	0	0	0	0	2	0	0
Tb09.244.0190	141	0	1	0	2	3	0	1	1	0	0	0	0	0	0	0	1	0	0	0	0
Tb09.244.0200	1602	6	2	5	7	16	3	5	10	0	1	0	1	0	0	2	4	0	2	0	0
Tb09.244.0210	922	1	1	2	1	10	1	5	4	1	0	0	0	0	0	0	1	0	0	0	0
Tb09.244.0220	1460	5	6	6	10	14	0	10	5	0	1	0	2	0	0	0	2	0	1	1	0
Tb09.244.0230	1513	5	2	8	5	5	2	8	6	1	0	0	1	0	0	1	6	0	1	0	0
Tb09.244.0240	530	2	1	1	2	8	0	6	4	0	0	0	2	0	0	0	0	0	1	0	0
Tb09.244.0250	1470	4	1	2	1	5	1	2	6	0	0	0	1	0	0	0	1	0	2	0	0
Tb09.244.0260	240	0	0	0	0	4	0	0	1	1	0	0	0	0	0	0	0	1	0	0	0
Tb09.244.0270	1502	4	3	1	3	12	3	12	8	0	0	1	3	0	0	1	2	0	2	0	0
Tb09.244.0280	972	1	0	0	3	8	0	0	1	0	0	0	0	0	0	0	0	0	0	0	0
Tb09.244.0290	1525	6	2	5	2	10	1	7	4	0	1	0	2	0	1	1	3	0	5	0	0
Tb09.244.0300	213	0	0	1	1	0	1	1	0	0	0	0	1	0	0	0	1	0	0	0	0
Tb09.244.0320	597	0	0	1	0	3	1	2	0	0	0	0	0	0	0	2	0	0	1	0	0
Tb09.244.0330	1573	9	4	8	3	17	0	5	7	1	0	0	1	0	0	1	5	0	3	1	0
Tb09.244.0340	234	0	0	1	1	4	0	2	0	0	0	0	0	0	0	0	2	0	0	0	0
Tb09.244.0350	1532	2	4	3	4	5	0	4	5	0	1	0	1	0	0	1	2	0	0	0	0
Tb09.244.0360	1552	2	4	8	3	12	5	13	5	0	2	0	0	0	0	1	3	0	0	2	0
Tb09.244.0370	492	2	0	2	2	1	1	1	0	1	0	0	0	0	0	1	0	0	0	0	1
Tb09.244.0375	180	0	0	0	0	0	0	2	0	0	0	0	1	0	0	0	1	0	0	0	0
Tb09.244.0380	237	0	0	0	0	0	0	1	1	0	0	0	0	0	0	0	0	0	0	0	0
Tb09.244.0390	1506	7	1	7	4	9	3	3	5	2	0	0	3	0	0	2	1	0	0	0	0
Tb09.244.0400	1467	17	2	7	9	15	1	9	13	0	5	0	4	1	1	3	5	0	2	3	0
Tb09.244.0410	462	2	0	0	3	5	0	2	1	0	0	0	0	0	0	0	0	0	0	0	0
Tb09.244.0420	815	4	3	6	8	10	3	7	7	0	3	0	2	0	0	1	4	0	1	0	0
Tb09.244.0440	381	35	24	9	13	42	4	8	13	2	1	5	0	6	7	1	3	7	21	8	1
Tb09.244.0470	1611	5	2	6	3	15	1	5	8	1	2	0	1	7	13	34	2	0	4	1	0
Tb09.244.0475	177	0	0	0	1	0	0	3	2	0	0	0	0	0	0	0	0	0	0	0	0
Tb09.244.0480	1371	23	9	16	29	49	9	26	32	1	8	0	7	1	3	5	14	1	9	7	1
Tb09.244.0490	945	1	1	1	9	7	5	4	5	0	1	0	2	0	0	2	1	0	2	3	0
Tb09.244.0500	1429	6	4	5	5	13	2	12	8	1	0	0	6	0	0	4	1	0	3	2	0
Tb09.244.0510	312	0	1	0	2	2	0	1	1	1	0	0	1	0	0	0	0	0	0	0	0
Tb09.244.0530	1390	9	5	13	9	13	6	13	9	1	0	0	3	0	0	1	1	0	2	2	0
Tb09.244.0540	984	2	2	2	6	4	2	4	3	1	1	0	0	0	0	0	2	0	0	1	0
Tb09.244.0550	1362	8	5	10	10	22	6	10	14	1	2	0	3	0	0	0	3	0	3	3	0
Tb09.244.0560	1548	8	6	5	7	17	4	14	13	4	2	0	4	0	0	2	7	0	3	0	0
Tb09.244.0570	1524	5	5	6	10	13	6	7	5	0	1	0	4	0	0	1	6	0	2	0	1
Tb09.244.0580	1401	1	0	3	4	11	0	4	4	1	0	0	0	0	0	0	2	0	1	0	0
Tb09.244.0610	1616	10	6	12	13	30	8	21	26	0	0	1	2	1	2	2	7	0	1	4	0
Tb09.244.0620	1626	11	4	3	8	20	1	16	16	1	0	2	2	0	1	1	6	0	2	1	0
Tb09.244.0630	1558	10	4	9	9	20	2	9	12	1	1	0	2	0	1	1	3	0	1	1	0
Tb09.244.0640	1464	10	4	10	12	16	2	12	5	0	2	0	2	0	0	1	3	0	6	0	0
Tb09.244.0650	1445	6	1	6	9	16	3	15	25	0	3	2	1	0	1	3	3	0	4	0	0
Tb09.244.0660	1579	6	2	4	2	9	1	9	6	0	0	0	3	0	1	1	2	0	1	0	0
Tb09.244.0670	1542	4	1	3	4	8	1	5	6	0	2	0	2	0	0	1	2	0	0	0	0
Tb09.244.0680	1333	3	2	6	2	4	4	5	2	0	2	0	1	0	0	0	1	0	1	1	0
Tb09.244.0690	1395	6	2	7	4	8	3	2	5	1	4	0	2	1	0	0	4	0	2	1	1
Tb09.244.0700	978	5	3	3	5	6	2	5	6	1	1	0	0	0	0	0	1	0	0	3	0
Tb09.244.0710	1537	6	5	3	6	11	1	13	6	0	4	0	3	0	0	3	3	0	2	0	0
Tb09.244.0750	1525	12	2	3	2	12	4	6	6	2	3	0	1	0	0	0	3	0	1	0	0
Tb09.244.0770	1534	5	1	2	3	9	7	8	3	0	3	0	2	1	0	2	2	0	1	1	0
Tb09.244.0780	1514	10	5	3	9	17	2	19	10	1	1	0	5	0	3	2	6	0	5	5	0
Tb09.244.0790	1415	4	3	2	1	4	1	6	5	0	0	0	1	0	0	0	1	0	2	1	0
Tb09.244.0800	1533	3	1	1	3	13	2	3	4	0	2	0	1	0	0	0	3	0	2	1	0
Tb09.244.0815	291	91900	54129	1	1	3	1	0	4	0	1	0	0	0	0	0	0	0	0	0	0
Tb09.244.0860	1463	4	4	8	2	11	4	5	3	0	0	0	1	1	2	2	3	0	0	0	0
Tb09.244.0870	1490	7	1	3	1	17	2	7	13	1	2	0	0	0	0	0	1	0	1	1	0
Tb09.244.0880	1115	6	1	4	10	12	1	5	6	0	0	0	0	0	0	0	1	0	0	0	0
Tb09.244.0900	1529	5	3	5	5	10	3	3	4	0	0	0	0	0	0	1	2	0	2	0	1
Tb09.244.0910	1533	4	3	3	5	13	2	7	8	2	3	0	2	0	1	0	0	0	0	0	0
Tb09.244.0920	1501	3	2	4	3	4	3	4	3	1	0	0	0	0	2	0	1	1	1	0	0
Tb09.244.0930	1645	2	3	2	1	7	2	7	6	0	1	0	1	0	0	0	4	0	1	1	0
Tb09.244.0940	809	0	2	2	0	7	1	3	1	0	0	0	0	0	0	0	0	0	0	1	0
Tb09.244.0960	1543	5	4	2	8	13	6	5	8	2	4	0	2	0	0	0	3	0	1	0	0
Tb09.244.0970	1499	4	0	3	2	12	3	6	11	0	0	0	0	0	2	0	0	1	2	0	0
Tb09.244.0980	1506	14	17	18	8	15	2	6	28	2	0	6	1	1	3	2	5	2	2	4	2
Tb09.244.0990	1569	8	5	4	6	19	3	10	9	0	3	0	0	0	0	0	2	0	3	2	0
Tb09.244.1000	1443	6	3	1	8	11	5	8	4	2	1	0	5	0	1	0	2	0	0	0	0
Tb09.244.1010	942	17	18	3	13	79	46	55	35	0	1	1	0	2	11	5	23	2	50	5	6
Tb09.244.1020	1607	5	3	4	1	11	5	9	8	0	0	0	1	0	0	0	4	0	0	1	0
Tb09.244.1050	706	10	4	6	4	24	6	5	9	2	2	0	1	0	0	0	1	0	3	1	0
Tb09.244.1070	1472	4	1	2	1	10	0	7	7	3	0	0	2	0	0	1	1	0	2	0	0
Tb09.244.1090	1455	14	10	9	4	20	4	15	7	0	7	0	5	0	0	0	1	0	2	2	0
Tb09.244.1100	1009	1	3	0	16	7	1	6	3	1	0	0	0	6	7	4	11	1	0	0	0
Tb09.244.1110	1500	6	3	4	5	13	1	8	6	0	1	0	0	0	0	0	2	0	4	0	0
Tb09.244.1120	288	2	2	0	2	4	1	2	2	0	0	0	0	0	0	0	0	0	0	0	0
Tb09.244.1130	1332	11	2	10	7	20	2	5	6	1	5	0	4	3	0	3	7	0	4	0	2
Tb09.244.1140	1491	3	6	5	8	16	5	10	12	1	2	0	6	2	1	0	1	0	2	0	0
Tb09.244.1170	902	17	16	5	15	77	45	49	36	0	2	1	0	2	11	5	29	3	54	6	7
Tb09.244.1180	1414	9	1	7	5	8	1	3	3	1	4	0	2	0	1	1	2	0	2	1	0
Tb09.244.1190	1533	6	2	7	9	16	3	10	11	1	4	0	4	0	1	3	5	0	1	3	0
Tb09.244.1200	886	8	3	9	11	10	2	13	6	0	2	0	3	0	1	1	4	0	1	0	0
Tb09.244.1210	965	2	2	1	0	6	1	3	7	0	0	0	0	0	0	0	0	0	0	0	0
Tb09.244.1220	1571	1	3	5	8	10	6	4	2	2	0	0	2	0	0	0	0	0	0	1	0
Tb09.244.1230	1491	11	2	4	8	28	3	11	5	1	2	0	3	1	1	0	2	0	5	3	0
Tb09.244.1240	1256	0	2	1	3	4	1	4	2	1	1	0	0	0	0	0	1	0	0	0	0
Tb09.244.1250	1560	10	3	5	3	16	4	6	12	0	2	0	2	0	0	1	2	0	2	0	0
Tb09.244.1260	1570	7	5	8	6	21	5	9	6	0	4	0	1	0	0	0	4	0	0	2	0
Tb09.244.1270	339	2	1	0	1	5	1	3	0	0	1	0	0	0	0	0	0	0	0	1	0
Tb09.244.1280	1498	5	2	2	4	11	1	9	2	0	1	0	2	0	2	0	0	0	1	0	0
Tb09.244.1300	1387	4	1	2	8	14	4	2	2	1	3	0	3	0	0	0	3	0	2	0	0
Tb09.244.1310	1510	8	2	5	1	9	2	4	1	0	0	0	2	0	0	0	2	0	0	1	0
Tb09.244.1330	806	6	0	4	1	5	0	3	1	0	0	0	0	0	0	0	2	0	0	0	0
Tb09.244.1340	1009	1	2	1	4	8	2	5	6	0	0	0	0	0	0	0	0	0	0	0	0
Tb09.244.1350	1509	4	4	4	10	10	6	4	7	3	3	0	10	0	2	2	4	0	2	2	0
Tb09.244.1360	1488	7	3	6	2	18	5	13	5	0	3	0	2	0	2	1	5	0	5	2	0
Tb09.244.1380	1550	7	4	2	6	20	7	8	7	2	1	0	3	0	0	2	3	1	2	1	0
Tb09.244.1390	1555	9	4	10	5	9	2	9	4	1	1	0	1	0	1	2	3	1	0	1	0
Tb09.244.1410	1581	22	8	25	5	16	4	8	4	2	2	0	4	0	1	3	3	0	3	2	0
Tb09.244.1440	1390	8	6	13	7	13	2	9	7	0	0	0	4	0	0	0	1	0	0	2	0
Tb09.244.1450	1409	8	0	5	8	17	4	16	10	3	0	1	2	1	2	0	4	0	5	0	2
Tb09.244.1470	921	3	2	3	4	5	2	4	3	1	1	0	0	0	0	0	3	0	0	1	0
Tb09.244.1480	1534	7	5	9	9	18	6	8	10	1	1	0	1	0	1	0	2	0	3	3	0
Tb09.244.1490	1548	9	4	10	6	20	3	9	9	2	6	0	4	1	0	0	0	0	2	2	0
Tb09.244.1510	1523	5	5	11	8	16	1	8	7	1	2	0	3	0	0	4	2	0	0	0	0
Tb09.244.1530	1428	1	0	2	6	13	1	7	3	0	0	0	1	0	0	0	2	0	1	0	0
Tb09.244.1540	1403	7	0	2	3	4	2	0	7	1	1	0	2	0	0	0	2	0	1	1	0
Tb09.244.1550	1461	5	4	3	3	12	2	3	4	0	1	0	1	0	0	2	2	0	2	1	0
Tb09.244.1560	1501	9	4	4	1	11	4	6	5	0	0	0	1	0	0	0	1	0	0	0	0
Tb09.244.1570	1551	13	8	3	4	7	2	2	6	0	1	0	3	0	0	1	1	0	1	0	0
Tb09.244.1580	1653	60	39	74	40	25	3	8	43	0	1	1	4	3	3	2	8	0	1	0	0
Tb09.244.1590	1504	4	3	3	2	5	3	7	9	0	2	0	1	0	0	3	3	1	0	0	0
Tb09.244.1600	1530	22	9	15	5	25	4	15	16	1	6	2	8	1	0	3	7	0	5	0	0
Tb09.244.1620	1439	6	1	6	5	6	2	5	7	0	1	0	1	2	0	0	3	1	1	0	0
Tb09.244.1630	411	2	1	1	0	3	1	2	1	0	0	0	0	0	0	0	0	0	0	0	0
Tb09.244.1650	345	1	1	1	2	2	3	0	0	0	0	0	1	0	0	0	0	0	2	0	0
Tb09.244.1680	1380	10	3	5	8	13	3	12	14	0	1	0	2	1	1	0	6	0	2	0	0
Tb09.244.1690	1439	10	5	4	4	12	1	6	5	1	1	1	1	1	0	0	1	0	0	3	0
Tb09.244.1700	1480	6	1	6	6	10	0	4	12	0	1	1	3	0	3	1	4	0	2	1	0
Tb09.244.1710	1524	3	2	3	5	9	3	5	2	0	0	0	2	0	0	1	4	0	2	1	0
Tb09.244.1720	1550	8	6	11	8	26	6	9	8	1	5	0	0	0	1	1	1	0	3	1	0
Tb09.244.1730	546	3	2	1	2	3	2	2	2	0	0	0	1	0	0	0	0	0	1	2	0
Tb09.244.1740	1512	6	1	6	6	10	3	12	13	1	1	0	3	0	0	1	1	0	0	0	0
Tb09.244.1750	1369	4	1	5	3	7	1	5	4	2	1	0	0	0	2	3	2	0	1	1	0
Tb09.244.1780	1444	6	4	4	7	8	1	3	5	0	0	0	2	0	2	0	1	0	0	1	0
Tb09.244.1790	1518	7	2	3	3	10	5	9	4	0	0	0	3	1	0	1	1	0	1	1	0
Tb09.244.1800	1045	6	1	4	4	6	1	5	9	0	0	0	0	0	0	0	1	0	1	1	0
Tb09.244.1830	1545	7	5	4	3	15	1	7	5	1	2	0	1	0	0	0	3	0	2	0	0
Tb09.244.1840	612	2	1	3	3	7	1	3	2	0	0	0	0	1	0	0	1	0	0	0	0
Tb09.244.1850	1569	7	3	7	5	7	4	2	6	1	1	0	2	0	0	0	3	0	1	0	0
Tb09.244.1860	1464	5	4	5	5	6	2	3	5	0	1	0	2	0	1	3	5	0	2	1	1
Tb09.244.1870	1467	5	1	0	4	9	2	5	4	0	1	0	1	0	0	0	2	0	1	1	0
Tb09.244.1880	1450	6	5	3	7	15	5	5	5	0	3	2	2	0	0	0	2	0	3	0	0
Tb09.244.1890	427	2	1	2	5	4	2	2	0	0	1	0	0	0	0	0	0	0	0	1	0
Tb09.244.1910	384	1	0	2	0	2	0	0	3	0	0	0	0	0	1	0	1	0	1	0	0
Tb09.244.1920	1447	5	0	4	5	10	1	2	3	0	0	0	3	0	0	0	1	0	1	1	0
Tb09.244.1930	1439	2	2	4	12	10	6	9	10	1	1	0	1	0	1	0	2	0	1	2	0
Tb09.244.1940	537	2	2	2	2	3	3	2	1	1	0	2	0	0	3	0	1	0	1	1	0
Tb09.244.1950	453	3	1	1	1	6	0	7	4	0	1	0	0	0	0	0	3	0	0	0	1
Tb09.244.1960	306	4	0	4	1	2	1	4	5	0	0	0	0	0	0	0	2	0	1	0	0
Tb09.244.1970	480	46	24	31	23	9	1	17	12	0	0	0	3	2	2	3	1	0	4	3	2
Tb09.244.1980	1524	36	56	19	29	19	11	22	35	1	2	16	5	5	5	11	2	3	19	15	4
Tb09.244.1990	399	6	19	2	8	17	11	15	6	2	1	1	0	1	1	3	0	3	18	3	2
Tb09.244.2000	279	1	1	1	0	3	0	0	2	1	0	1	0	0	1	0	0	1	6	0	1
Tb09.244.2010	489	21	22	17	18	36	14	20	45	1	2	17	1	12	2	7	5	12	47	15	13
Tb09.244.2020	1449	74	68	20	40	151	57	47	61	28	12	37	11	29	37	14	8	30	98	42	20
Tb09.244.2030	345	2	0	1	6	10	2	6	2	0	0	0	0	0	1	0	3	0	2	0	2
Tb09.244.2040	282	1	0	2	5	4	0	5	2	0	0	1	0	0	0	0	0	0	1	1	1
Tb09.244.2050	459	2	4	2	3	2	1	1	2	0	0	1	0	1	0	0	0	2	0	1	1
Tb09.244.2060	1229	167	111	107	63	225	105	161	164	47	39	40	10	39	22	14	16	89	145	45	27
Tb09.244.2070	831	284	321	42	46	822	328	131	130	173	156	73	21	204	204	59	40	199	732	59	48
Tb09.244.2080	279	33	22	8	10	55	19	34	53	17	11	17	3	11	16	8	8	11	80	14	8
Tb09.244.2090	369	22	20	10	7	102	49	56	84	14	17	14	2	9	14	6	13	15	81	17	9
Tb09.244.2110	318	2	3	1	8	5	2	5	9	1	0	7	1	2	3	4	2	2	9	5	5
Tb09.244.2120	1458	403	213	121	77	319	183	93	243	42	24	32	11	142	156	138	140	217	923	223	160
Tb09.244.2140	231	17	15	14	11	33	29	59	54	6	14	13	6	5	4	4	5	18	35	13	16
Tb09.244.2150	2118	475	453	272	363	828	379	802	1090	91	85	71	22	138	179	157	163	104	468	115	76
Tb09.244.2160	1694	123	153	82	174	823	334	914	904	33	33	16	3	27	46	47	68	14	134	21	8
Tb09.244.2170	1792	133	166	56	82	103	41	59	87	0	5	4	2	14	7	4	12	5	22	2	7
Tb09.244.2180	1773	78	83	40	57	187	90	88	137	25	19	36	5	24	41	20	28	30	111	31	12
Tb09.244.2190	465	0	0	0	0	0	0	0	0	0	0	0	0	0	0	0	0	0	0	0	0
Tb09.244.2200	1422	0	0	1	1	0	0	0	0	0	0	0	0	0	0	0	0	0	1	0	0
Tb09.244.2230	648	0	0	0	0	0	0	0	0	0	0	0	0	0	0	0	0	0	0	0	0
Tb09.244.2240	1425	0	0	0	0	0	0	0	0	0	0	0	0	0	0	0	0	0	0	0	0
Tb09.244.2270	648	2	0	0	1	0	0	0	0	0	0	0	0	0	0	0	1	0	0	0	0
Tb09.244.2280	1425	1	2	1	0	1	1	0	1	0	0	0	0	0	0	0	0	0	0	0	1
Tb09.244.2290	366	0	0	0	0	0	0	0	0	0	0	0	0	0	0	0	0	0	0	0	0
Tb09.244.2310	1425	1	2	1	0	1	1	0	1	0	0	0	0	0	0	0	0	0	0	0	1
Tb09.244.2330	1428	1	2	1	0	1	1	0	1	0	0	0	0	0	0	0	0	0	0	0	1
Tb09.244.2340	381	37	17	8	6	54	32	3	14	11	11	2	0	18	21	3	1	37	101	10	6
Tb09.244.2350	1308	145	131	30	35	619	256	72	53	112	83	36	7	119	110	40	26	217	711	79	32
Tb09.244.2360	399	18	17	13	5	34	27	50	48	0	4	8	1	4	8	2	2	7	36	10	4
Tb09.244.2380	4660	373	233	139	99	564	235	409	469	72	82	69	15	106	73	37	45	119	332	100	56
Tb09.244.2390	1623	442	400	96	144	1139	428	396	455	195	169	65	10	171	174	82	61	171	553	122	57
Tb09.244.2400	1190	303	394	41	75	674	281	111	86	181	100	66	16	128	150	28	26	131	555	34	16
Tb09.244.2410	842	217	230	30	40	300	137	74	67	33	14	23	1	39	65	31	19	57	222	48	17
Tb09.244.2420	1172	134	221	25	56	378	209	74	83	147	70	52	16	91	121	38	52	93	452	33	17
Tb09.244.2430	1190	166	218	26	42	299	157	56	61	88	37	42	9	68	101	25	20	84	300	23	11
Tb09.244.2440	1190	131	214	33	47	323	191	71	83	78	34	25	5	73	80	45	63	63	244	34	22
Tb09.244.2450	1388	138	182	30	57	183	112	74	78	52	36	31	6	52	95	69	90	72	397	57	34
Tb09.244.2460	1520	222	258	39	53	360	208	95	113	60	29	25	3	55	75	34	41	65	281	57	18
Tb09.244.2470	1244	267	351	57	65	513	249	113	122	114	64	56	11	101	138	62	82	122	484	77	39
Tb09.244.2480	824	158	154	31	37	311	131	80	85	46	43	19	4	36	57	34	39	61	196	52	15
Tb09.244.2490	929	108	157	20	32	200	117	66	81	54	22	16	4	49	72	45	49	52	229	32	25
Tb09.244.2500	929	86	133	16	22	163	83	54	53	10	17	17	3	28	42	38	42	41	138	37	29
Tb09.244.2510	839	219	280	44	66	482	225	96	143	84	52	32	8	85	126	88	90	110	439	97	44
Tb09.244.2520	839	124	201	30	42	267	135	62	92	47	26	17	3	56	80	45	61	67	263	50	31
Tb09.244.2530	947	80	146	34	35	139	90	44	49	16	8	21	2	24	38	31	41	40	127	46	20
Tb09.244.2540	1416	270	251	90	109	486	174	120	217	29	30	2	4	93	109	151	204	80	300	35	28
Tb09.244.2550	1930	113	60	30	26	141	63	67	65	11	10	16	5	20	20	18	23	35	83	24	11
Tb09.244.2560	3826	639	416	149	178	435	236	207	313	12	6	5	4	43	42	45	110	89	119	18	10
Tb09.244.2570	3378	2162	1394	1542	1038	883	741	560	1191	49	34	26	18	103	66	107	441	316	356	119	35
Tb09.244.2580	2272	298	183	128	94	124	75	46	120	21	9	4	4	51	28	23	31	74	134	28	12
Tb09.244.2590	422	2965	2356	4101	2506	4397	1496	5282	11159	1970	878	7944	1124	2544	3433	1936	1068	2040	9563	4320	2192
Tb09.244.2600	9147	1183	957	757	600	326	221	262	439	72	87	150	35	183	120	89	219	398	357	166	94
Tb09.244.2610	348	65	126	4	11	122	53	25	25	2	9	0	1	2	9	3	3	6	11	1	1
Tb09.244.2620	1352	244	219	30	25	534	270	91	85	146	91	45	10	176	175	96	77	207	381	71	37
Tb09.244.2630	849	3149	2533	4288	2544	11479	3485	13292	18405	3211	2796	13868	2748	4976	5282	4214	1716	4462	11088	6830	4243
Tb09.244.2640	2163	304	217	56	32	674	294	79	116	288	257	48	13	146	101	14	19	291	356	24	20
Tb09.244.2650	2858	411	168	57	67	185	114	37	45	54	42	31	10	108	64	22	25	154	154	37	18
Tb09.244.2660	4204	931	475	384	207	731	736	365	614	60	57	53	19	147	129	95	415	333	189	84	42
Tb09.244.2670	1648	302	131	31	30	197	80	33	63	42	19	40	5	76	52	8	8	101	159	26	21
Tb09.244.2680	1018	196	157	46	29	319	147	87	148	114	65	25	7	106	86	19	20	151	209	29	17
Tb09.244.2690	369	51	72	18	20	92	37	233	213	132	110	128	38	43	70	37	24	51	196	93	33
Tb09.244.2700	784	146	125	16	15	239	105	42	75	92	69	33	1	89	92	16	10	150	328	35	25
Tb09.244.2710	2066	274	193	141	68	619	282	226	241	194	182	83	30	223	231	95	57	310	694	184	116
Tb09.244.2720	666	2443	1666	2923	1496	5956	2045	7164	8292	1971	1423	9269	1527	3342	3037	2034	1078	2982	7026	4065	3474
Tb09.244.2725	345	218	68	232	65	1069	470	1327	1437	249	215	1021	247	525	583	334	153	348	930	616	433
Tb09.244.2730	946	6969	4311	7322	3614	12214	4198	15223	22734	6096	4706	17711	4612	8952	8540	5636	3323	9242	16762	10354	6743
Tb09.244.2740	960	6645	3980	7123	3375	11246	3953	14135	21245	5747	4332	16299	4225	8484	7875	5216	3043	8545	15486	9546	6341
Tb09.244.2750	1353	176	183	30	23	448	227	115	179	129	126	61	20	63	64	15	12	83	142	27	17
Tb09.244.2760	699	501	444	287	192	1315	530	987	1197	520	445	525	153	792	707	499	383	663	1364	722	399
Tb09.244.2770	554	49	50	10	9	175	55	14	18	66	41	16	7	50	53	17	8	70	221	19	29
Tb09.244.2780	2374	463	305	137	113	529	404	215	258	242	216	84	21	208	155	111	164	353	446	136	66
Tb09.244.2790	805	160	113	18	6	211	96	33	34	84	97	48	11	129	116	14	11	88	175	15	7
Tb09.244.2800	1424	339	222	67	53	145	125	34	58	18	8	12	4	79	102	66	98	92	201	35	19
Tb09.244.2810	843	57	80	5	16	371	128	17	34	71	38	22	7	100	128	17	8	99	525	32	29
Tb09.244.2820	1618	225	170	28	42	469	216	71	78	174	142	49	11	151	108	17	15	220	362	33	14
Tb09.244.2830	1981	205	235	36	48	576	228	152	301	122	78	57	16	190	237	45	23	222	868	80	33
Tb09.244.2840	642	259	281	172	147	807	322	1020	1216	163	99	223	52	195	237	181	134	208	740	364	192
Tb09.244.2850	779	262	253	39	38	676	278	123	169	147	97	56	11	261	317	193	102	298	944	270	131
Tb09.244.2860	464	114	124	9	9	274	167	20	12	59	39	21	2	118	150	74	32	111	373	22	21
Tb09.244.2870	441	65	71	17	18	83	33	17	17	17	16	7	1	30	26	5	9	29	61	11	8
Tb09.244.2880	309	20	43	11	24	32	20	20	23	9	6	30	8	20	7	10	8	14	46	20	10
Tb09.244.2890	1380	161	68	125	122	183	75	104	129	31	37	31	11	46	28	20	29	52	79	30	17
Tb09.244.2990	219	36	28	3	7	38	19	13	11	5	2	6	1	10	9	4	2	10	28	6	5
Tb09.354.0010	1452	0	0	0	1	0	0	1	0	0	0	0	0	0	0	0	0	0	0	0	0
Tb09.354.0020	318	0	0	0	0	0	0	0	0	0	0	0	0	0	0	0	0	0	0	0	0
Tb09.354.0030	1544	0	0	0	0	0	0	0	0	0	0	0	0	0	0	0	0	0	0	0	0
Tb09.354.0040	1413	0	0	0	0	0	0	0	0	0	0	0	0	0	0	0	0	0	0	0	0
Tb09.354.0050	339	0	0	0	0	0	0	0	0	0	0	0	0	0	0	0	0	0	0	0	0
Tb09.354.0055	259	0	0	0	0	0	0	0	0	0	0	0	0	0	0	0	0	0	0	0	0
Tb09.354.0060	1464	0	0	0	0	0	0	0	0	0	0	0	0	0	0	0	0	0	0	0	0
Tb09.354.0070	1344	11	2	3	4	15	3	5	7	0	1	0	1	0	0	4	3	0	3	1	0
Tb09.354.0080	839	77	182	64	188	259	150	261	361	4	1	3	2	4	7	9	14	4	23	7	6
Tb09.354.0090	1500	1	1	0	1	0	0	0	0	0	0	0	0	0	0	0	0	0	0	0	0
Tb09.354.0100	423	0	1	0	1	2	0	3	0	0	0	0	2	0	0	0	0	0	0	0	0
Tb09.354.0120	1525	10	2	2	6	11	0	3	3	0	0	0	0	0	1	2	2	0	1	1	0
Tb09.354.0130	1532	8	1	5	7	6	1	1	8	0	1	0	3	0	0	1	2	0	1	0	0
Tb09.354.0140	1612	5	3	3	5	15	4	7	5	1	1	0	0	0	0	1	3	2	1	0	0
Tb09.354.0150	453	1	0	2	0	5	1	3	0	1	1	0	0	0	1	1	1	0	0	1	0
Tb09.354.0160	1644	9	1	4	6	4	2	10	5	0	0	0	1	0	0	0	3	1	0	0	1
Tb09.354.0170	923	4	4	0	2	23	12	15	21	1	3	0	0	0	6	2	0	0	2	0	0
Tb09.354.0180	1527	10	2	11	9	25	3	17	13	1	1	0	5	0	0	3	0	3	5	4	4
Tb09.354.0190	425	3	0	2	4	5	1	5	5	0	0	0	1	1	0	1	0	2	10	7	5
Tb09.354.0200	1387	15	8	12	15	43	7	19	24	1	7	0	6	0	1	2	5	2	6	9	4
Tb09.354.0210	1425	14	0	7	4	19	3	6	9	0	4	0	4	0	0	1	2	0	2	1	0
Tb09.354.0220	1555	10	2	12	9	20	7	11	3	0	2	1	5	0	0	0	0	0	3	2	3
Tb09.354.0230	1497	21	2	8	4	20	7	10	6	3	1	0	5	0	0	2	2	0	0	1	1
Tb09.354.0240	1593	4	3	4	5	11	0	4	3	0	0	0	2	0	0	0	2	0	0	0	0
Tb09.354.0250	1564	4	3	4	2	3	2	3	1	0	0	0	0	0	1	0	2	0	1	0	0
Tb09.354.0260	1580	15	8	8	12	35	2	17	12	1	2	0	13	0	0	1	4	1	32	8	8
Tb09.v1.0020	240	0	1	1	0	0	0	0	2	0	0	0	1	0	0	0	1	0	0	0	0
Tb09.v1.0030	336	0	0	0	0	1	0	0	0	0	0	0	0	0	0	0	0	0	0	0	0
Tb09.v1.0050	111	1	0	2	1	0	0	1	1	0	0	0	0	0	0	0	1	0	0	0	0
Tb09.v1.0060	513	11	16	0	2	48	26	2	3	6	18	1	0	6	3	2	0	5	53	0	1
Tb09.v1.0080	165	25	22	5	6	26	39	25	24	1	3	1	0	8	10	2	19	27	15	9	1
Tb09.v1.0090	156	9	2	4	2	16	10	2	0	3	0	0	0	5	5	0	6	15	24	1	2
Tb09.v1.0100	216	6	12	6	8	39	24	27	38	3	5	2	0	2	7	7	8	3	12	2	0
Tb09.v1.0110	249	12	25	1	6	29	19	5	6	0	0	0	0	2	2	0	0	6	7	0	0
Tb09.v1.0130	1998	534	410	104	85	1132	451	277	386	401	241	202	53	357	386	91	60	569	1459	269	136
Tb09.v1.0140	447	71	82	12	31	126	62	69	85	22	24	60	4	41	37	6	6	77	153	27	17
Tb09.v1.0150	1998	610	489	115	101	1265	503	302	411	449	275	224	57	423	435	101	69	657	1612	286	174
Tb09.v1.0160	447	86	98	16	36	165	71	80	103	27	25	69	4	51	44	8	8	89	173	32	22
Tb09.v1.0170	135	2	0	2	1	3	0	0	1	1	0	0	0	1	1	0	0	0	2	1	1
Tb09.v1.0180	345	170	107	71	39	71	52	48	130	17	11	8	2	50	73	41	57	40	135	30	15
Tb09.v1.0190	237	4	6	1	1	15	6	5	3	6	2	2	0	5	2	1	1	1	9	2	1
Tb09.v1.0200	147	43	47	0	9	70	28	4	7	36	13	9	1	75	68	11	4	74	212	9	12
Tb09.v1.0210	255	11	6	1	5	6	6	2	2	2	1	0	0	3	2	1	2	4	6	2	1
Tb09.v1.0220	375	13	16	1	4	35	22	5	6	0	5	0	0	6	6	3	2	4	15	1	0
Tb09.v1.0230	258	34	27	3	8	52	39	32	37	32	23	6	2	18	19	11	9	55	131	29	10
Tb09.v1.0240	246	41	17	8	8	286	90	82	70	105	48	43	7	53	68	11	10	65	321	35	38
Tb09.v1.0250	267	22	15	15	4	11	10	41	56	2	5	19	1	12	3	4	2	10	12	10	7
Tb09.v1.0260	138	5	3	4	6	5	1	3	9	1	1	2	0	0	0	0	1	0	1	0	2
Tb09.v1.0270	387	86	86	9	16	456	167	121	122	120	112	34	6	45	67	10	16	82	312	53	20
Tb09.v1.0280	432	22	25	1	14	70	29	10	13	12	10	2	1	9	7	2	6	8	33	3	2
Tb09.v1.0290	1104	0	0	1	1	0	0	0	1	0	0	0	0	0	0	0	0	0	0	0	0
Tb09.v1.0300	1146	8	15	1	3	4	1	4	3	1	0	0	0	1	1	0	2	0	1	0	0
Tb09.v1.0310	1123	26	20	12	19	76	45	89	113	1	4	2	0	5	4	6	6	6	17	6	1
Tb09.v1.0320	1419	31	39	14	23	46	41	32	77	1	3	8	0	1	5	4	3	0	13	3	4
Tb09.v1.0330	786	0	0	0	0	0	0	0	0	0	0	0	0	0	0	0	0	0	0	0	0
Tb09.v1.0340	123	2	7	2	5	7	4	1	3	1	0	1	2	3	0	0	0	5	7	2	0
Tb09.v1.0350	1757	258	159	39	42	459	200	232	225	189	172	93	16	95	82	28	21	211	380	56	42
Tb09.v1.0360	336	11	13	7	2	46	24	28	23	18	19	5	1	4	4	3	0	12	38	3	5
Tb09.v1.0370	2499	398	274	76	73	343	213	82	124	86	93	93	15	142	108	33	27	265	411	71	35
Tb09.v1.0380	983	682	599	449	376	2504	1042	2901	3116	617	496	887	221	537	550	480	285	1291	3651	2079	1137
Tb09.v1.0390	828	132	153	20	27	764	292	127	132	129	107	40	15	59	76	23	11	161	491	90	41
Tb09.v1.0400	535	58	20	17	5	129	52	37	44	39	29	17	5	33	44	12	6	45	117	15	11
Tb09.v1.0410	2434	234	158	52	54	362	180	65	111	51	36	53	9	99	80	10	17	168	292	41	23
Tb09.v1.0420	657	177	289	50	75	719	281	287	239	65	49	34	5	143	193	180	206	176	783	248	173
Tb09.v1.0430	327	4	1	0	0	4	1	5	5	0	0	0	0	0	0	0	0	2	1	0	0
Tb09.v1.0450	918	1	1	0	0	0	0	3	0	0	0	0	0	0	0	0	0	0	0	0	0
Tb09.v1.0460	858	0	0	0	0	0	0	0	0	0	0	0	0	0	0	0	0	0	0	0	0
Tb09.v1.0470	930	1	5	0	1	4	5	0	3	1	0	0	0	0	1	0	0	1	2	0	1
Tb09.v1.0480	849	0	0	0	0	0	0	0	0	0	0	0	0	0	0	0	0	0	0	0	0
Tb09.v1.0490	273	103	121	96	75	120	71	98	273	10	0	10	8	10	23	25	34	34	85	47	34
Tb09.v1.0500	942	2	6	0	1	6	6	3	4	1	0	0	0	0	1	0	0	1	2	0	1
Tb09.v1.0510	858	0	0	0	0	0	0	0	0	0	0	0	0	0	0	0	0	0	0	0	0
Tb09.v1.0525	273	84	82	57	46	91	60	84	193	4	1	10	5	10	23	29	27	27	70	48	26
Tb09.v1.0530	942	2	6	0	1	6	6	3	4	1	0	0	0	0	1	0	0	1	2	0	1
Tb09.v1.0540	858	0	0	0	0	0	0	0	0	0	0	0	0	0	0	0	0	0	0	0	0
Tb09.v1.0550	147	5	3	4	0	12	5	2	13	1	0	0	0	1	0	3	0	1	1	0	1
Tb09.v1.0560	156	17	17	1	3	51	22	6	6	5	3	0	0	3	2	1	2	10	40	0	0
Tb09.v1.0570	123	12	39	7	6	27	20	16	35	8	5	10	0	8	21	7	0	12	89	17	14
Tb09.v1.0580	123	5	23	0	3	81	35	12	24	23	18	1	0	10	16	6	7	15	52	4	1
Tb09.v1.0590	261	41	75	15	22	111	53	49	69	28	18	39	9	41	53	66	39	52	274	85	49
Tb09.v1.0600	210	32	31	7	6	53	13	9	15	13	5	7	1	16	12	2	3	17	80	3	2
Tb09.v1.0610	99	23	11	28	16	43	25	28	44	2	1	3	3	6	8	2	15	9	23	12	5
Tb09.v1.0620	117	10	11	1	1	20	16	2	5	2	0	0	0	7	5	0	1	14	25	0	1
Tb09.v1.0630	348	9	18	7	22	64	36	16	69	3	1	0	0	7	4	4	26	5	19	2	1
Tb09.v1.0640	445	4319	3287	5427	3246	12310	4679	21160	26291	6722	4848	20988	4593	7732	7934	4011	2861	5084	19444	7608	4997
Tb09.v1.0650	1686	1091	503	466	252	619	312	190	487	155	130	125	36	629	678	802	738	539	1410	521	230
Tb09.v1.0660	123	6	4	0	0	6	1	2	0	1	0	0	0	1	0	1	1	2	8	2	0
Tb09.v1.0670	114	8	9	0	3	25	11	0	4	9	8	2	2	4	2	1	1	10	20	1	1
Tb09.v1.0690	309	1	3	1	2	3	0	0	3	0	1	0	1	1	0	0	0	1	2	0	1
Tb09.v1.0710	195	26	32	4	14	23	16	4	13	6	2	2	2	4	2	2	2	17	12	3	6
Tb09.v1.0720	216	35	36	5	9	36	18	15	17	18	9	7	5	10	9	0	1	20	36	9	2
Tb09.v1.0730	372	20	13	7	11	39	17	39	40	18	10	25	5	15	9	7	1	11	36	6	7
Tb09.v1.0740	393	31	22	7	9	31	12	3	2	5	3	1	1	7	10	1	3	14	38	2	0
Tb09.v1.0750	354	4	8	0	7	45	21	13	19	0	1	0	1	5	4	3	4	3	8	0	0
Tb09.v1.0760	180	1	2	0	2	16	9	5	12	1	0	0	1	0	0	0	5	1	0	1	0
Tb09.v1.0770	303	3	17	0	17	85	42	29	47	3	4	0	2	2	4	0	3	1	3	0	0
Tb09.v1.0780	114	0	1	0	1	1	1	1	1	0	0	0	0	0	0	0	0	0	2	0	0
Tb09.v1.0820	366	0	0	0	0	0	0	0	0	0	0	0	0	0	0	0	0	0	0	0	0
Tb09.v1.0830	366	0	0	0	0	0	0	0	0	0	0	0	0	0	0	0	0	0	0	0	0
Tb09.v1.0840	426	22	16	9	10	105	29	109	127	7	5	6	0	6	5	2	6	3	34	3	1
Tb09.v1.0850	297	0	3	0	6	36	12	60	65	1	2	0	1	0	1	1	1	1	2	1	0
Tb09.v1.0860	195	15	17	5	9	25	15	21	31	0	0	2	2	1	1	0	4	3	8	3	1
Tb09.v1.0880	342	0	0	0	0	0	0	1	0	0	0	0	2	0	0	0	0	0	1	0	0
Tb09.v1.0900	471	0	0	0	2	3	0	0	2	0	0	0	0	0	0	0	0	0	0	1	0
Tb09.v1.0910	300	0	0	1	1	0	0	0	1	0	0	0	0	0	0	0	0	0	0	0	0
Tb09.v1.0950	1409	8	0	5	9	18	4	16	10	3	0	1	2	1	2	0	4	0	5	0	2
Tb09.v1.0970	504	5	0	1	4	7	0	3	2	0	0	0	0	0	0	0	0	0	0	0	0
Tb09.v1.0980	177	0	1	0	2	4	0	0	0	0	0	0	0	0	0	0	0	0	0	0	0
Tb09.v2.0010	4152	3583	2451	1008	1293	182	69	82	156	15	6	3	6	40	29	61	208	84	120	31	14
Tb09.v2.0020	1429	965	1180	308	315	1741	617	389	691	452	256	315	78	603	593	324	203	896	2486	517	304
Tb09.v2.0030	1456	1543	1866	589	609	2712	985	735	1373	818	520	657	162	888	897	570	341	1420	4128	1081	548
Tb09.v2.0040	291	17	10	5	9	15	9	17	19	15	6	16	2	13	17	2	2	9	79	20	5
Tb09.v2.0050	324	75	88	30	45	348	129	256	328	45	26	71	19	38	48	10	14	53	277	91	47
Tb09.v2.0060	920	3	1	2	4	3	4	3	3	1	1	0	0	0	1	1	0	1	0	0	0
Tb09.v2.0070	1522	3	1	5	5	12	2	8	8	0	0	0	1	0	0	1	2	0	0	0	0
Tb09.v2.0080	1439	6	2	4	5	13	4	3	5	0	0	0	2	0	0	0	1	0	3	0	0
Tb09.v2.0090	1535	3	1	5	5	6	1	9	3	0	1	0	2	1	0	0	4	0	1	0	0
Tb09.v2.0100	310	1	1	0	3	2	1	3	1	0	0	0	1	0	0	0	0	0	0	0	0
Tb09.v2.0110	320	0	1	0	0	5	1	2	5	0	0	0	0	0	0	0	1	0	0	0	0
Tb09.v2.0120	228	0	0	0	0	0	0	0	0	0	0	0	0	0	0	0	0	0	0	0	0
Tb09.v2.0130	165	0	0	0	0	0	0	0	0	0	0	0	0	0	0	0	0	0	0	0	0
Tb09.v2.0140	394	3	0	3	2	3	2	2	0	0	3	1	1	0	0	0	2	0	1	0	0
Tb09.v2.0150	534	0	0	3	0	0	0	1	1	0	0	0	0	0	0	0	0	0	0	0	0
Tb09.v2.0160	308	0	0	0	0	5	0	0	4	0	0	0	0	0	0	0	0	0	0	0	0
Tb09.v2.0170	1469	6	6	6	5	32	6	4	4	0	1	0	6	0	2	4	4	1	0	3	0
Tb09.v2.0190	124	0	0	0	0	3	3	0	6	0	0	0	0	1	0	0	1	0	1	0	0
Tb09.v2.0200	1620	11	1	9	3	8	1	8	9	0	1	0	3	2	3	1	5	0	3	2	1
Tb09.v2.0210	831	0	1	2	0	10	1	8	2	0	0	0	0	0	0	0	0	0	1	0	0
Tb09.v2.0220	1394	7	2	5	6	3	0	2	3	0	2	0	1	0	0	1	5	0	1	1	0
Tb09.v2.0230	216	1	0	0	2	1	0	0	0	0	0	0	0	0	0	0	0	0	0	0	0
Tb09.v2.0240	1379	1	1	6	7	9	0	3	5	0	1	0	0	0	0	0	2	0	2	1	0
Tb09.v2.0250	402	0	1	0	0	2	0	2	0	0	1	0	0	0	0	0	0	0	0	0	0
Tb09.v2.0260	180	0	0	0	0	3	0	1	0	0	0	0	0	0	0	0	0	0	0	0	0
Tb09.v2.0270	180	0	0	0	0	3	0	1	0	0	0	0	0	0	0	0	0	0	0	0	0
Tb09.v2.0280	343	1	1	1	1	2	0	0	4	1	0	0	0	0	0	0	1	0	0	0	0
Tb09.v2.0290	339	0	2	1	1	3	0	2	1	0	0	0	0	0	0	1	0	0	0	0	0
Tb09.v2.0300	392	1	1	3	0	4	0	1	3	0	0	0	0	0	0	0	2	0	0	0	0
Tb09.v2.0310	1372	13	8	11	9	19	5	21	11	1	4	0	7	0	0	0	6	0	0	0	0
Tb09.v2.0320	263	0	1	2	1	3	0	0	2	0	0	0	0	0	0	0	0	0	2	0	0
Tb09.v2.0330	215	1	0	0	2	2	0	2	2	0	0	0	0	0	0	0	0	0	1	0	0
Tb09.v2.0340	297	2	0	3	2	4	0	1	5	0	0	0	3	0	0	0	0	0	1	0	0
Tb09.v2.0350	141	0	1	1	1	1	0	1	0	0	0	0	0	0	0	0	0	0	0	0	0
Tb09.v2.0360	345	5	7	8	8	3	2	1	5	2	0	2	3	2	5	1	4	2	1	1	2
Tb09.v2.0370	1327	7	4	8	5	10	4	2	13	0	1	0	1	0	0	1	2	0	2	0	0
Tb09.v2.0380	340	1	0	1	2	1	0	0	2	0	0	0	0	0	0	0	0	0	0	0	0
Tb09.v2.0390	300	1	2	1	2	5	0	1	1	0	0	0	0	0	0	0	2	0	0	0	0
Tb09.v2.0400	1391	10	4	4	0	7	3	11	6	3	2	0	2	1	0	1	2	0	3	3	0
Tb09.v2.0410	180	0	0	0	0	3	0	1	0	0	0	0	0	0	0	0	0	0	0	0	0
Tb09.v2.0420	417	1	0	0	4	1	1	0	0	0	3	0	0	0	0	0	1	0	0	0	0
Tb09.v2.0430	1569	7	1	2	5	15	5	4	4	0	4	0	4	0	0	1	6	0	2	0	0
Tb09.v2.0440	269	1	0	0	2	7	1	2	2	0	0	0	0	0	0	0	0	0	0	0	0
Tb09.v2.0450	365	23	43	5	24	16	5	12	20	2	1	2	0	1	3	3	7	0	5	0	1
Tb09.v4.0001	1422	0	3	1	0	4	4	0	5	1	0	0	2	0	0	1	0	0	0	0	0
Tb09.v4.0002	1218	1	1	5	0	2	1	1	2	0	0	0	0	0	0	0	2	0	1	0	0
Tb09.v4.0003	1314	3	1	8	1	4	1	7	5	0	3	0	1	0	0	1	1	0	0	1	0
Tb09.v4.0004	1452	2	1	3	2	9	1	6	3	0	0	0	2	0	0	0	0	0	2	0	0
Tb09.v4.0005	1482	11	5	8	7	19	2	10	6	0	0	0	2	0	1	4	2	0	1	0	0
Tb09.v4.0006	519	6	3	4	1	8	2	6	6	2	0	0	1	0	0	1	1	0	2	0	1
Tb09.v4.0007	582	2	5	8	6	9	3	9	8	2	2	0	2	0	0	1	0	0	2	1	1
Tb09.v4.0008	849	5	0	0	0	2	0	2	1	0	0	0	1	0	0	0	0	0	3	2	2
Tb09.v4.0009	3729	310	168	107	75	231	119	83	190	40	28	52	11	87	44	32	37	91	0	61	0
Tb09.v4.0010	1356	172	139	27	29	597	256	66	60	102	76	36	5	130	115	37	25	226	0	81	0
Tb09.v4.0011	1422	0	0	0	0	0	0	0	0	0	0	0	0	0	0	0	0	0	0	0	0
Tb09.v4.0012	1428	0	0	0	0	0	0	0	0	0	0	0	0	0	0	0	0	0	0	0	0
Tb09.v4.0013	1761	32	15	10	15	67	33	19	23	2	4	1	1	1	3	2	6	7	0	4	0
Tb09.v4.0014	687	114	137	76	150	592	268	722	702	6	8	2	0	9	16	22	43	10	0	5	0
Tb09.v4.0015	699	318	314	191	239	550	231	481	658	49	31	16	6	87	120	130	118	38	0	60	0
Tb09.v4.0016	1458	304	181	82	67	216	128	58	162	24	16	22	10	118	125	121	93	174	0	165	0
Tb09.v4.0017	831	285	358	39	53	944	360	134	142	185	159	77	24	204	213	65	38	230	0	72	0
Tb09.v4.0018	1188	184	132	116	69	256	121	169	176	52	46	51	14	44	21	16	16	95	0	51	0
Tb09.v4.0019	471	6	3	3	2	3	0	6	9	2	0	2	1	0	2	1	1	1	0	1	0
Tb09.v4.0020	417	5	4	3	6	12	3	11	18	1	0	2	0	0	1	3	2	0	0	1	0
Tb09.v4.0021	1470	4	1	4	0	10	6	3	3	0	0	0	0	0	0	0	1	0	0	2	0
Tb09.v4.0022	1404	1	0	0	0	1	0	1	0	0	0	0	0	0	0	0	0	0	0	0	0
Tb09.v4.0023	1401	1	0	0	0	3	1	0	0	0	0	0	0	1	0	0	0	0	0	0	0
Tb09.v4.0024	1110	2	2	0	3	22	4	8	21	1	0	0	0	0	1	0	0	0	0	0	0
Tb09.v4.0025	1394	5	2	2	3	10	1	1	4	0	1	0	3	1	0	1	1	0	0	0	0
Tb09.v4.0026	1536	2	4	3	3	6	1	3	0	0	2	0	1	0	0	1	1	0	0	0	0
Tb09.v4.0027	1036	0	2	1	0	7	0	0	0	0	0	0	0	0	0	0	0	0	0	0	0
Tb09.v4.0028	707	6	3	2	6	26	2	8	13	0	1	0	0	0	0	0	1	0	0	5	0
Tb09.v4.0029	1524	10	3	2	9	11	4	11	5	1	4	0	4	1	3	3	2	0	0	1	0
Tb09.v4.0030	1500	10	5	4	8	10	1	2	7	0	0	0	1	1	0	0	7	0	0	0	0
Tb09.v4.0031	1428	3	1	0	1	5	1	2	2	0	0	0	2	0	2	0	2	0	0	0	0
Tb09.v4.0032	758	0	1	0	0	3	2	0	1	1	0	0	2	0	0	0	0	1	0	0	0
Tb09.v4.0033	820	0	0	1	0	2	0	1	2	0	0	0	0	0	0	0	0	0	0	0	0
Tb09.v4.0034	1310	0	0	0	1	2	0	0	1	0	0	0	0	0	0	0	1	0	0	0	0
Tb09.v4.0035	705	6	1	3	1	6	1	3	6	0	0	0	1	0	0	0	2	0	0	0	0
Tb09.v4.0036	1476	5	2	4	4	7	0	3	4	0	0	0	1	0	0	0	1	0	0	0	0
Tb09.v4.0037	1398	1	0	1	0	0	1	0	0	0	0	0	0	0	1	0	0	0	0	0	0
Tb09.v4.0038	1007	0	0	0	0	0	0	0	0	0	0	0	0	0	0	0	0	0	0	0	0
Tb09.v4.0039	1521	3	3	0	0	3	2	3	0	0	0	0	1	1	0	3	0	0	0	0	0
Tb09.v4.0040	906	0	0	0	0	0	0	0	0	0	0	0	0	0	0	0	0	0	0	0	0
Tb09.v4.0041	1477	32	56	12	19	28	14	22	18	4	1	3	3	0	0	4	7	2	0	3	0
Tb09.v4.0042	603	108	145	70	95	32	14	20	61	1	0	2	1	4	8	12	10	9	0	6	0
Tb09.v4.0043	1497	0	0	1	3	1	1	1	2	0	0	0	0	0	0	0	0	0	0	1	0
Tb09.v4.0044	1407	0	0	0	0	0	0	0	0	0	0	0	0	0	0	0	0	0	0	0	0
Tb09.v4.0045	525	0	0	0	0	0	0	0	0	0	0	0	0	0	0	0	0	0	0	0	0
Tb09.v4.0046	1278	0	0	0	0	0	0	0	0	0	0	0	0	0	0	1	0	0	0	0	0
Tb09.v4.0047	1161	0	2	1	0	4	3	0	5	0	0	0	2	0	0	1	0	0	0	0	0
Tb09.v4.0048	1141	1	1	4	0	2	1	1	2	0	0	0	0	0	0	0	2	0	0	0	0
Tb09.v4.0049	1227	3	1	8	1	4	1	7	5	0	3	0	1	0	0	1	1	0	0	1	0
Tb09.v4.0050	1452	2	1	3	2	9	1	6	3	0	0	0	2	0	0	0	0	0	0	0	0
Tb09.v4.0051	1482	11	5	8	7	19	2	10	6	0	0	0	2	0	1	4	2	0	0	0	0
Tb09.v4.0052	1281	8	8	12	10	17	8	17	14	5	2	0	3	1	0	2	2	0	0	1	0
Tb09.v4.0053	852	5	0	0	0	2	0	2	1	0	0	0	1	0	0	0	0	0	0	2	0
Tb09.v4.0054	787	7	1	5	4	10	1	7	4	0	3	0	3	0	0	0	4	0	0	1	0
Tb09.v4.0055	438	3	0	0	0	2	2	2	3	0	0	0	3	0	0	0	1	0	0	0	0
Tb09.v4.0056	1068	6	8	6	7	6	1	7	3	1	0	0	4	0	1	0	4	0	0	2	0
Tb09.v4.0057	1608	0	0	1	0	5	1	0	1	0	1	0	0	0	0	0	0	0	0	0	0
Tb10_rRNA_1:rRNA	169	1059	291	308	178	99	46	96	69	256	162	1077	235	3382	3123	252	72	67	1734	374	451
Tb10_rRNA_2:rRNA	1828	3031875	2438637	3888698	2816361	7179972	6717464	7706240	7460276	6610400	6892546	5917433	6164470	6806286	5955116	5315029	7448976	5424532	4793375	4579040	4068770
Tb10_snoRNA_0034:snoRNA	65	39	36	19	24	55	20	29	45	96	71	453	55	70	66	44	20	17	85	23	8
Tb10_snoRNA_0041:snoRNA	69	24	30	15	13	75	20	34	40	132	85	610	84	71	69	50	27	25	91	20	13
Tb10_snoRNA_0049:snoRNA	65	34	28	20	17	51	18	25	33	103	65	434	55	74	66	46	14	22	81	26	10
Tb10_snoRNA_0055:snoRNA	66	22	27	12	18	51	26	27	45	156	114	648	144	74	74	68	32	24	83	20	12
Tb10_snoRNA_0084:snoRNA	49	51	34	58	42	295	124	292	257	235	119	1028	175	172	185	144	93	105	573	196	100
Tb10_snRNA_1:snRNA	110	10	3	6	4	4	2	5	6	7	11	3	12	6	5	10	2	2	13	9	4
Tb10_snRNA_2:snRNA	62	0	0	0	0	1	0	0	0	0	0	0	0	0	1	0	0	0	0	0	0
Tb10_tRNA_Ala_1:tRNA	72	3	2	1	3	0	0	1	1	3	1	0	1	2	2	0	1	0	0	0	0
Tb10_tRNA_Arg_1:tRNA	73	1	0	0	4	5	2	10	2	0	1	0	2	0	1	1	0	0	0	0	0
Tb10_tRNA_Arg_2:tRNA	73	1	0	0	1	9	1	4	2	1	0	0	0	0	1	2	2	0	1	0	0
Tb10_tRNA_Asn_1:tRNA	73	2	0	0	0	2	1	1	2	0	0	0	0	1	0	0	0	1	1	0	0
Tb10_tRNA_Gly_1:tRNA	71	2	0	0	0	38	6	1	0	4	12	2	0	1	0	0	0	2	9	0	0
Tb10_tRNA_Leu_1:tRNA	82	3	1	1	0	2	1	3	6	1	1	1	1	0	3	0	2	0	0	0	1
Tb10_tRNA_Lys_1:tRNA	72	2	1	2	0	11	1	4	3	1	1	0	4	1	0	1	0	1	0	0	0
Tb10_tRNA_Met_1:tRNA	72	1	0	2	0	2	1	1	0	1	1	0	1	0	0	0	0	0	0	0	0
Tb10_tRNA_Pro_1:tRNA	72	6	1	2	1	3	2	5	3	9	6	1	0	5	4	0	0	0	4	0	1
Tb10_tRNA_Pro_2:tRNA	72	0	0	2	3	4	1	2	0	0	0	0	0	0	1	0	1	0	3	0	0
Tb10_tRNA_Thr_1:tRNA	72	0	0	0	0	1	0	1	0	0	0	1	0	0	0	1	0	0	0	0	0
Tb10.v4.0032	1308	89	68	30	30	260	178	183	207	170	124	118	40	35	24	14	14	62	0	31	0
Tb10.v4.0033	1719	763	832	479	429	374	248	215	520	24	17	11	7	94	67	96	257	135	0	63	0
Tb10.v4.0034	864	346	234	19	23	706	236	91	87	242	113	49	9	210	246	27	14	254	0	38	0
Tb10.v4.0035	774	704	510	330	276	981	408	816	1235	273	210	283	64	317	390	185	128	335	0	556	0
Tb10.v4.0036	984	139	91	18	21	195	149	13	14	58	50	12	6	138	130	28	13	137	0	23	0
Tb10.v4.0037	3368	534	350	105	78	621	348	95	138	126	72	70	10	173	133	37	49	311	0	65	0
Tb10.v4.0038	1842	492	385	87	77	612	268	155	257	210	181	76	14	159	148	27	27	400	0	70	0
Tb10.v4.0039	2973	403	412	65	62	254	122	44	132	44	40	37	16	171	146	54	57	231	0	77	0
Tb10.v4.0040	975	258	374	47	67	988	394	314	266	370	251	125	31	143	172	18	14	256	0	94	0
Tb10.v4.0041	1077	320	252	27	26	473	238	91	139	65	36	24	3	101	128	67	78	137	0	69	0
Tb10.v4.0042	688	105	66	26	41	247	80	169	158	69	76	116	25	29	28	26	13	33	0	64	0
Tb10.v4.0043	1107	158	215	22	27	300	117	48	59	126	90	113	17	166	134	33	22	227	0	54	0
Tb10.v4.0044	1992	179	113	33	22	116	75	36	53	23	11	41	6	42	37	18	24	73	0	25	0
Tb10.v4.0045	888	465	470	83	64	905	366	336	460	251	145	111	32	274	283	163	111	396	0	273	0
Tb10.v4.0046	1452	248	165	33	37	585	292	97	104	134	117	70	11	98	97	11	6	202	0	27	0
Tb10.v4.0047	1630	0	0	1	1	2	0	0	1	0	0	0	1	0	0	0	0	0	0	0	0
Tb10.v4.0048	1659	3	1	6	4	10	4	11	1	0	2	0	4	0	0	2	2	0	0	1	0
Tb10.v4.0049	537	1	1	2	5	3	0	3	1	0	1	0	0	0	0	0	0	0	0	0	0
Tb10.v4.0050	432	1	0	1	0	1	0	0	1	0	0	0	0	0	0	0	0	0	0	0	0
Tb10.v4.0051	486	0	0	0	1	1	0	0	1	0	0	0	1	0	0	0	1	0	0	0	0
Tb10.v4.0052	14643	6558	1703	8272	2115	284	90	141	313	25	16	78	31	157	196	314	3234	546	0	330	0
Tb11_rRNA_1	169	5336	1919	4865	1854	163	117	431	265	3857	2329	12770	3240	25698	39882	4688	975	1004	20104	6055	6456
Tb11_rRNA_2	1508	1607324	1165624	1939368	1368447	2559873	2461881	2748439	2737056	2159279	2306311	1795924	1733118	2942711	2913949	1852226	2346395	1957177	1800416	1611899	1509739
Tb11_snoRNA_0001	66	28	33	17	16	79	27	44	35	83	44	263	51	44	37	30	29	38	68	18	13
Tb11_snoRNA_0002	101	84	61	24	34	176	76	87	68	190	116	781	138	81	98	65	55	31	179	79	42
Tb11_snoRNA_0003	73	14	13	5	7	36	27	10	19	28	20	151	17	14	10	3	11	9	26	8	1
Tb11_snoRNA_0004	97	35	24	8	22	90	47	53	65	54	30	207	18	34	22	16	17	10	72	10	10
Tb11_snoRNA_0005	90	38	26	5	11	191	84	78	93	81	30	253	25	41	42	32	15	33	142	49	28
Tb11_snoRNA_0006	78	14	14	2	6	40	26	28	34	48	15	141	23	27	22	25	7	10	49	16	9
Tb11_snoRNA_0007	66	30	46	21	26	145	56	110	78	105	83	518	75	67	52	54	33	54	147	49	23
Tb11_snoRNA_0008	101	69	50	21	27	135	62	72	61	171	91	636	119	61	84	55	42	25	154	63	32
Tb11_snoRNA_0009	74	10	14	7	7	70	45	36	42	48	55	189	40	11	21	11	13	5	33	10	4
Tb11_snoRNA_0010	97	38	30	8	22	91	52	56	70	59	34	230	20	35	25	18	17	15	87	15	12
Tb11_snoRNA_0011	90	38	26	5	11	191	84	78	93	81	30	253	25	41	42	32	15	33	142	49	28
Tb11_snoRNA_0012	78	14	14	2	6	40	26	28	34	48	15	141	23	27	22	25	7	10	49	16	9
Tb11_snoRNA_0013	66	24	32	13	18	83	29	56	42	72	44	258	51	47	37	31	25	36	79	20	11
Tb11_snoRNA_0014	101	49	30	17	20	110	58	62	57	148	67	506	104	53	76	42	35	21	122	48	26
Tb11_snoRNA_0015	73	13	13	5	7	35	26	10	19	28	20	151	17	14	10	3	11	9	26	8	1
Tb11_snoRNA_0016	97	35	24	8	22	89	47	53	65	54	30	207	18	34	22	16	17	10	72	10	10
Tb11_snoRNA_0017	90	37	25	5	10	181	83	76	90	79	30	247	25	39	40	31	15	33	134	48	28
Tb11_snoRNA_0018	78	14	14	2	6	40	26	28	34	48	15	141	23	27	22	25	7	10	49	16	9
Tb11_snoRNA_0019	66	24	32	13	18	83	29	56	42	72	44	258	51	47	37	31	25	36	79	20	11
Tb11_snoRNA_0020	101	84	61	24	34	176	76	87	68	190	116	781	138	81	98	65	55	31	179	79	42
Tb11_snoRNA_0021	73	6	1	0	2	13	2	5	3	7	1	16	6	1	3	3	3	2	5	0	2
Tb11_snoRNA_0022	97	47	32	10	25	113	52	58	67	78	57	321	31	44	33	17	19	11	91	12	10
Tb11_snoRNA_0023	90	38	26	5	11	191	84	78	93	81	30	253	25	41	42	32	15	33	142	49	28
Tb11_snoRNA_0024	78	14	14	2	6	40	26	28	34	48	15	141	23	27	22	25	7	10	49	16	9
Tb11_snoRNA_0025	66	24	32	13	18	83	29	56	42	72	44	258	51	47	37	31	25	36	79	20	11
Tb11_snoRNA_0026	101	85	61	26	34	179	76	87	69	192	117	789	140	81	98	65	56	32	186	79	43
Tb11_snoRNA_0027	74	16	14	7	9	94	47	48	49	57	56	214	45	12	25	17	15	7	40	12	5
Tb11_snoRNA_0028	97	35	24	8	22	89	47	53	65	54	30	206	18	34	22	15	17	10	72	10	10
Tb11_snoRNA_0029	90	38	26	5	11	191	84	78	93	81	30	253	25	41	42	32	15	33	142	49	28
Tb11_snoRNA_0030	78	14	14	2	6	40	26	28	34	48	15	141	23	27	22	25	7	10	46	16	9
Tb11_snoRNA_0031	66	3	5	0	5	25	9	20	17	10	7	55	6	7	3	9	2	4	15	4	3
Tb11_snoRNA_0032	45	24	25	4	9	39	8	17	8	31	38	193	23	20	18	17	8	4	36	18	5
Tb11_snoRNA_0033	78	24	36	7	5	75	27	27	23	7	8	9	0	7	8	9	4	10	47	6	3
Tb11_snoRNA_0034	86	16	36	4	5	47	14	7	13	13	11	7	0	20	22	8	7	17	76	4	2
Tb11_snoRNA_0035	78	4	16	3	1	25	15	9	5	4	5	2	1	4	6	4	6	9	15	3	3
Tb11_snoRNA_0036	86	1	0	0	1	2	2	0	1	2	1	1	0	0	2	0	1	1	6	0	0
Tb11_snoRNA_0037	76	2	4	1	0	0	0	0	0	0	0	0	0	0	4	0	0	0	2	0	0
Tb11_snoRNA_0038	183	8547	7894	3176	7936	1744	5337	44708	65609	14744	7882	95367	9443	20613	18899	11344	3997	23637	44470	24074	22727
Tb11_snoRNA_0039	75	49	36	24	31	103	31	68	103	270	143	723	170	59	74	42	14	27	101	35	18
Tb11_snoRNA_0040	90	24	11	19	6	26	5	9	11	9	5	17	11	1	6	3	6	1	7	1	1
Tb11_snoRNA_0041	269	16052	13280	7049	13176	3972	10307	86150	128262	26286	13885	176740	16057	38056	34580	21150	7500	46236	83798	45439	52076
Tb11_snoRNA_0042	75	13	9	8	15	30	4	5	11	51	29	92	36	4	7	3	5	3	3	4	1
Tb11_snoRNA_0043	90	57	26	27	33	73	13	18	25	15	17	44	22	9	13	4	16	2	15	7	5
Tb11_snoRNA_0044	72	13	9	1	0	41	9	10	17	27	19	99	9	16	11	8	4	4	47	9	6
Tb11_snoRNA_0045	92	11	14	11	2	44	10	13	14	111	31	196	39	27	33	16	13	26	134	25	17
Tb11_snoRNA_0046	103	16	8	11	2	46	17	8	23	82	33	120	29	16	29	15	8	22	110	23	27
Tb11_snoRNA_0047	75	39	26	8	4	66	40	8	16	13	26	19	4	18	37	9	5	49	111	20	14
Tb11_tRNA_Ala_1	72	0	0	0	0	0	0	0	0	0	0	0	0	0	0	0	0	0	0	0	0
Tb11_tRNA_Arg_1	72	2	0	1	3	0	2	5	4	0	0	0	0	0	0	0	0	0	0	0	0
Tb11_tRNA_Glu_1	72	5	2	2	4	10	2	1	8	0	1	0	0	1	0	0	2	1	3	1	0
Tb11_tRNA_Gly_1	71	1	1	0	0	0	0	1	1	0	0	0	0	0	0	0	0	0	1	0	0
Tb11_tRNA_His_1	71	1	1	0	3	2	1	2	4	0	1	0	0	0	0	1	1	0	1	1	0
Tb11_tRNA_Phe_1	73	3	2	2	0	7	0	1	1	0	0	0	0	3	0	0	0	0	0	1	0
Tb11_tRNA_Phe_2	73	3	4	2	5	11	1	1	3	0	0	0	0	0	0	0	1	0	0	0	1
Tb11.01.0010	1827	609	865	97	144	402	167	92	161	26	25	64	8	79	81	34	31	127	425	101	46
Tb11.01.0020	1833	797	1166	116	205	578	226	102	206	34	41	60	12	87	113	44	45	151	524	113	53
Tb11.01.0030	1830	587	774	101	154	393	163	75	140	18	21	47	8	68	71	34	26	118	357	69	29
Tb11.01.0040	1830	669	951	110	157	402	192	89	147	24	24	49	12	96	77	37	29	143	460	90	44
Tb11.01.0050	1830	480	631	76	121	347	133	65	121	16	18	29	9	54	55	24	25	94	272	60	25
Tb11.01.0060	601	218	246	53	43	129	60	55	74	6	6	41	5	29	31	14	7	47	107	45	24
Tb11.01.0070	705	112	98	34	27	215	100	42	64	44	22	62	12	69	36	13	13	120	206	41	17
Tb11.01.0080	1832	634	843	106	143	420	169	80	148	25	23	49	13	74	71	31	27	120	374	79	33
Tb11.01.0090	624	93	97	48	46	168	50	65	88	6	3	7	0	15	21	10	17	31	56	14	3
Tb11.01.0100	1653	306	259	95	79	660	259	189	223	116	75	42	15	78	84	32	19	191	359	61	35
Tb11.01.0110	1562	149	122	40	36	120	75	29	59	27	20	24	9	42	29	9	16	44	129	17	12
Tb11.01.0120	1446	198	216	159	142	522	234	439	588	104	77	303	41	127	130	111	94	128	430	154	113
Tb11.01.0130	942	237	176	52	48	655	258	335	405	160	122	60	9	221	261	139	101	217	620	143	66
Tb11.01.0135	559	62	58	9	9	219	87	54	34	94	73	23	3	71	59	10	5	123	270	32	18
Tb11.01.0140	2037	418	308	67	75	371	200	56	125	96	73	46	8	93	71	15	21	230	390	38	14
Tb11.01.0150	1942	296	314	58	65	473	216	67	131	83	41	63	17	94	91	24	6	182	486	52	25
Tb11.01.0160	1524	257	99	45	31	206	91	49	85	31	18	16	6	68	80	30	23	98	284	29	20
Tb11.01.0170	1946	745	389	423	182	509	257	195	574	170	100	100	24	217	183	128	244	432	551	210	100
Tb11.01.0180	2758	561	393	113	100	156	101	41	142	18	27	37	3	99	60	51	126	174	253	60	29
Tb11.01.0190	414	15	50	2	9	73	36	2	7	4	3	1	0	7	15	5	5	26	44	1	0
Tb11.01.0200	1680	225	189	57	43	234	126	41	79	28	7	38	5	77	71	31	38	130	179	33	15
Tb11.01.0210	498	8	8	2	3	69	18	21	15	9	3	3	0	0	4	2	2	3	14	3	2
Tb11.01.0220	1305	306	215	166	133	133	64	35	84	20	10	14	3	29	27	27	91	43	58	31	14
Tb11.01.0230	1500	63	43	15	16	75	45	18	23	19	15	3	3	26	31	9	7	41	107	9	7
Tb11.01.0240	1364	362	281	142	141	295	146	77	237	41	24	32	8	85	114	99	129	126	307	101	54
Tb11.01.0250	2226	433	404	59	71	293	131	25	113	50	29	28	4	131	148	39	20	173	574	55	20
Tb11.01.0260	2798	648	448	71	88	540	269	89	167	70	35	49	12	109	87	38	36	241	401	59	34
Tb11.01.0270	1481	199	156	44	44	419	177	254	328	162	97	197	36	157	138	29	20	230	585	93	74
Tb11.01.0280	2418	540	614	70	123	647	256	139	180	128	88	86	7	195	153	37	22	256	392	63	23
Tb11.01.0290	1387	318	265	72	77	1130	493	844	1084	307	226	165	41	184	125	67	86	486	674	267	164
Tb11.01.0300	555	53	28	14	6	179	121	66	59	65	69	35	7	83	65	12	5	124	282	30	27
Tb11.01.0310	2645	305	195	92	48	129	90	43	64	35	14	58	16	98	74	40	35	162	206	52	42
Tb11.01.0320	1194	267	385	62	101	374	159	88	183	73	29	60	12	149	134	37	24	169	574	99	55
Tb11.01.0330	930	223	130	109	44	283	113	91	217	65	46	40	7	100	140	108	65	101	318	99	55
Tb11.01.0340	4050	1326	740	637	451	82	37	42	110	6	8	21	11	48	28	32	112	70	119	39	17
Tb11.01.0355	387	498	126	660	134	849	538	602	732	511	311	1644	784	934	1158	948	531	778	3299	1518	1616
Tb11.01.0360	2244	465	289	82	72	564	231	112	253	174	111	55	18	291	319	224	195	387	1036	327	159
Tb11.01.0370	973	190	198	20	26	331	160	42	52	120	90	37	11	115	83	12	10	139	338	26	22
Tb11.01.0380	2267	499	447	120	94	637	276	362	479	144	92	133	26	259	224	108	140	326	841	156	95
Tb11.01.0390	12557	2980	1642	1260	865	390	153	131	356	31	21	105	26	183	174	137	371	600	928	225	86
Tb11.01.0400	4067	582	355	135	138	123	120	67	128	36	35	64	17	132	91	32	73	302	335	72	34
Tb11.01.0410	927	197	265	123	119	293	177	176	234	128	83	62	26	84	67	49	78	161	356	117	31
Tb11.01.0415	237	90	91	41	35	568	127	250	460	75	63	112	14	73	96	45	39	72	353	83	44
Tb11.01.0420	1115	92	43	19	15	188	177	68	66	117	133	55	12	139	131	25	13	201	249	36	24
Tb11.01.0430	1024	181	66	16	25	410	150	64	54	98	68	32	8	94	89	8	5	157	325	20	17
Tb11.01.0440	657	199	168	29	27	482	260	69	76	106	98	51	13	135	179	36	17	188	522	59	21
Tb11.01.0450	1431	38	40	14	11	44	89	29	44	3	8	2	2	29	20	8	26	66	63	23	14
Tb11.01.0460	918	191	177	27	28	540	299	70	87	125	105	22	11	99	111	12	11	152	384	16	15
Tb11.01.0470	699	122	161	17	22	388	177	121	88	113	110	64	6	116	89	21	12	176	391	43	34
Tb11.01.0480	1751	673	673	423	320	1277	696	604	1198	290	227	441	105	591	517	426	423	823	1339	670	310
Tb11.01.0490	1647	855	679	172	135	609	304	106	247	120	71	35	18	170	170	54	67	233	333	64	33
Tb11.01.0500	1330	181	162	19	27	816	275	108	144	250	170	57	9	168	182	37	27	195	839	84	50
Tb11.01.0510	1279	356	189	62	32	311	182	68	111	142	104	56	5	263	244	90	56	305	557	78	49
Tb11.01.0520	561	75	50	12	8	111	62	13	24	33	19	19	5	38	36	10	1	40	191	8	6
Tb11.01.0530	2289	347	369	79	113	255	119	86	119	13	9	45	4	64	76	36	25	148	357	67	34
Tb11.01.0540	1640	180	96	24	48	443	220	75	78	53	34	65	9	76	90	26	22	116	537	49	32
Tb11.01.0550	492	13	6	3	4	20	6	10	13	2	6	10	0	5	2	0	4	8	7	8	6
Tb11.01.0560	381	20	3	9	5	20	16	28	33	8	6	25	4	4	5	1	1	7	21	9	9
Tb11.01.0580	2922	342	534	79	128	732	250	160	208	124	81	114	27	174	175	83	58	149	479	98	68
Tb11.01.0590	471	80	161	15	19	711	291	148	130	147	86	88	13	219	271	119	84	199	1240	252	171
Tb11.01.0600	1920	272	493	70	67	249	85	66	96	49	38	79	7	143	125	49	25	170	618	79	31
Tb11.01.0610	1671	354	352	56	72	411	210	54	106	109	81	80	17	180	128	37	23	293	344	59	29
Tb11.01.0620	1184	206	164	26	31	647	319	100	100	242	194	66	21	259	263	56	32	260	835	64	16
Tb11.01.0625	503	188	209	61	54	644	202	231	336	192	114	250	75	249	245	110	92	220	670	268	194
Tb11.01.0630	612	145	124	15	15	269	135	27	35	51	24	31	9	118	87	9	7	145	638	18	17
Tb11.01.0640	697	174	161	21	19	363	158	41	31	109	68	41	3	148	135	48	33	178	403	36	32
Tb11.01.0650	1677	168	53	18	20	127	74	37	78	41	50	32	9	85	79	24	23	143	207	40	23
Tb11.01.0660	1437	248	91	29	21	671	329	56	61	160	131	33	8	130	125	5	17	251	414	28	20
Tb11.01.0670	1665	195	129	35	41	420	184	92	129	137	115	105	20	112	76	24	17	220	345	39	27
Tb11.01.0680	2323	142	84	66	36	143	100	30	53	27	17	28	9	71	59	27	76	152	150	34	30
Tb11.01.0690	3738	510	345	129	127	182	189	109	175	41	44	66	26	64	45	36	75	206	224	65	50
Tb11.01.0700	1081	770	507	845	449	1910	887	2091	2988	250	219	346	80	298	233	256	260	693	917	554	238
Tb11.01.0710	2475	243	131	53	46	167	101	70	77	41	26	58	11	62	33	14	16	148	150	58	24
Tb11.01.0720	1467	237	212	47	49	469	226	122	160	58	57	44	7	50	42	56	49	155	201	47	20
Tb11.01.0725	1277	1257	1070	702	529	2235	856	2099	4448	947	567	1197	312	1965	1604	747	659	2637	4991	2358	1351
Tb11.01.0730	2200	1860	1880	828	801	3908	1361	3065	5817	1241	705	1487	318	2636	2193	935	753	3654	7319	2871	1843
Tb11.01.0760	1965	1077	956	436	395	2167	772	1501	2668	731	461	760	158	1313	1171	436	363	1704	3380	1326	872
Tb11.01.0770	1977	1254	1158	483	440	2583	920	1724	3110	885	551	919	212	1538	1349	548	447	2001	4216	1502	1114
Tb11.01.0780	366	103	125	52	38	411	183	279	218	111	149	125	24	101	122	95	58	108	601	211	94
Tb11.01.0790	1291	365	272	42	40	171	60	24	34	70	37	38	7	216	232	53	37	238	657	26	33
Tb11.01.0800	1257	278	236	33	45	681	248	79	101	268	157	79	19	191	241	27	15	249	644	40	38
Tb11.01.0810	1524	409	470	35	59	984	372	128	144	250	161	99	26	215	187	36	15	357	915	75	32
Tb11.01.0820	3651	797	559	150	106	104	66	67	98	17	13	52	11	69	40	25	40	115	93	39	22
Tb11.01.0830	1882	190	183	33	26	704	320	88	104	366	240	66	15	134	119	9	13	226	591	26	20
Tb11.01.0840	1242	240	170	153	78	383	216	196	416	93	54	58	13	91	113	59	52	164	365	114	61
Tb11.01.0850	2326	561	468	99	105	279	184	73	136	37	35	32	7	98	65	31	32	165	249	31	17
Tb11.01.0860	2310	282	128	43	46	80	50	23	47	18	20	15	6	25	32	14	31	91	107	34	19
Tb11.01.0870	1611	426	425	75	72	242	177	67	166	67	38	28	4	84	65	33	52	261	392	128	51
Tb11.01.0880	712	135	66	22	15	79	33	28	38	25	23	26	6	40	31	16	18	71	115	33	19
Tb11.01.0890	5460	503	296	129	116	157	144	83	148	41	49	69	12	89	56	25	53	205	219	46	32
Tb11.01.0900	1368	40	41	20	21	73	36	35	51	15	18	28	6	15	21	9	9	22	41	15	14
Tb11.01.0910	2637	674	687	103	97	866	532	258	372	179	144	65	21	154	106	18	32	347	434	63	37
Tb11.01.0920	1041	320	189	128	86	472	227	192	436	44	34	40	4	64	90	80	63	115	268	85	44
Tb11.01.0930	4228	478	282	106	125	211	142	59	133	29	24	72	10	98	75	31	46	229	330	59	44
Tb11.01.0940	1743	311	148	43	50	270	105	45	62	81	66	61	19	90	69	17	17	150	249	34	22
Tb11.01.0950	1754	451	276	51	38	392	192	68	98	162	106	75	21	160	119	13	17	157	258	40	23
Tb11.01.0960	3166	1248	1053	533	449	554	445	205	639	85	84	83	19	248	140	120	313	513	483	199	97
Tb11.01.0970	1101	121	107	15	17	196	79	24	28	83	43	38	6	70	60	6	6	81	172	25	9
Tb11.01.0980	5711	822	579	280	238	148	99	74	171	35	16	58	13	69	67	37	135	208	259	56	40
Tb11.01.1000	1738	388	247	105	58	202	97	45	119	34	31	41	10	95	102	109	131	149	295	155	63
Tb11.01.1020	1744	231	172	27	33	499	222	79	95	94	74	40	7	97	76	18	18	139	243	39	18
Tb11.01.1030	2776	329	91	39	53	229	189	31	57	64	30	42	28	127	92	34	43	212	325	35	17
Tb11.01.1040	2173	322	168	50	46	212	99	32	59	44	29	34	9	52	21	10	9	91	95	21	10
Tb11.01.1050	2541	237	98	68	43	108	102	67	126	29	19	58	6	39	36	23	25	93	106	33	24
Tb11.01.1070	2407	420	254	59	53	568	246	130	193	200	117	140	18	201	201	55	43	296	789	126	59
Tb11.01.1080	2772	343	344	65	70	221	159	34	75	45	35	35	1	39	32	13	18	101	135	22	11
Tb11.01.1090	805	137	127	20	25	390	185	155	120	142	98	124	36	96	73	17	9	137	299	44	24
Tb11.01.1100	3030	385	254	102	74	83	57	23	52	14	14	63	11	43	29	12	41	99	110	27	19
Tb11.01.1110	1047	164	66	12	14	123	87	19	28	70	35	56	15	43	17	9	3	70	122	3	6
Tb11.01.1120	1266	229	232	34	52	700	250	186	229	190	115	162	30	128	105	33	21	217	613	54	31
Tb11.01.1130	1608	157	97	44	26	166	93	49	74	38	26	55	17	79	72	25	50	173	213	53	25
Tb11.01.1140	1863	260	198	54	50	684	313	87	117	198	158	122	32	174	135	39	27	375	506	41	41
Tb11.01.1150	513	25	31	13	14	24	23	33	31	16	11	19	3	13	7	3	6	3	29	11	6
Tb11.01.1160	798	83	108	23	35	206	98	44	35	109	93	47	11	31	26	12	11	70	114	17	11
Tb11.01.1170	3694	662	378	275	160	557	250	155	184	204	201	129	38	143	171	71	238	267	696	140	64
Tb11.01.1180	492	156	148	48	43	166	116	197	282	91	51	42	9	78	85	61	66	104	203	96	77
Tb11.01.1190	1581	507	392	182	144	1041	411	491	825	249	138	141	48	305	362	258	209	355	1175	364	196
Tb11.01.1200	1194	256	155	25	25	379	150	43	72	153	92	54	10	152	130	16	14	219	479	45	28
Tb11.01.1210	1694	557	590	216	189	866	317	253	591	220	145	142	29	304	355	161	123	514	1142	260	128
Tb11.01.1215	619	115	62	25	24	505	187	169	140	160	105	33	10	103	130	26	22	151	531	60	31
Tb11.01.1220	709	200	149	43	41	423	161	129	158	93	59	48	4	54	78	27	17	77	288	57	31
Tb11.01.1230	1117	105	28	18	24	346	161	42	59	130	107	37	17	188	177	45	60	261	613	65	50
Tb11.01.1240	932	143	124	12	17	334	137	23	35	66	45	19	10	139	159	11	6	125	577	14	9
Tb11.01.1250	1061	225	297	33	45	704	276	67	72	296	197	79	20	207	220	42	25	324	1040	85	40
Tb11.01.1260	414	103	111	17	27	405	151	177	157	103	65	59	14	75	92	9	8	75	314	32	17
Tb11.01.1270	1769	208	170	46	46	388	170	95	100	104	82	86	13	215	204	73	60	281	531	59	30
Tb11.01.1280	2908	655	406	148	101	1100	523	352	594	295	218	132	30	238	164	45	56	565	854	133	76
Tb11.01.1290	1162	3477	2914	4242	2763	1325	793	896	4875	118	79	189	54	505	541	770	772	981	1770	1042	618
Tb11.01.1300	1709	288	162	79	47	270	146	60	149	119	91	84	17	180	174	101	59	226	363	138	54
Tb11.01.1310	1405	495	515	123	134	1238	543	561	732	404	306	155	37	318	351	93	71	503	1045	258	124
Tb11.01.1320	1638	298	380	50	48	703	263	75	108	384	273	96	24	298	275	22	19	455	1197	68	23
Tb11.01.1330	917	307	236	43	37	1089	397	102	100	346	326	123	22	275	236	29	17	422	797	42	35
Tb11.01.1340	793	483	457	281	281	949	447	564	870	267	260	273	81	309	272	121	82	420	1165	350	160
Tb11.01.1350	1428	9524	5558	9115	3991	6672	3244	4977	8573	2826	1919	3210	1216	3284	2709	1977	1720	5711	8222	5073	2862
Tb11.01.1360	906	330	322	142	108	621	237	284	444	257	165	185	25	216	193	74	46	331	773	275	126
Tb11.01.1370	1225	1187	1319	475	403	628	241	166	521	253	168	322	46	542	607	225	142	272	943	387	168
Tb11.01.1380	2892	195	195	48	43	434	191	147	188	270	222	651	144	308	252	106	74	245	569	70	60
Tb11.01.1390	744	199	160	26	23	151	87	25	37	36	28	15	4	102	126	90	76	134	269	49	30
Tb11.01.1400	1997	1478	1229	654	452	1494	625	634	1529	456	285	304	89	820	682	326	300	743	1099	417	163
Tb11.01.1410	1482	233	181	34	44	247	135	42	69	53	34	36	4	58	53	10	13	137	194	22	19
Tb11.01.1420	1157	190	199	20	26	413	143	48	51	149	99	34	3	67	77	18	10	183	462	46	25
Tb11.01.1440	1162	245	77	13	10	533	231	66	76	202	192	51	17	198	206	27	11	399	889	37	39
Tb11.01.1450	1814	202	121	29	26	283	152	45	66	126	88	39	7	84	69	9	12	148	228	23	16
Tb11.01.1460	1158	165	114	23	19	231	152	37	49	98	90	33	11	94	108	14	10	115	291	29	13
Tb11.01.1465	333	1374	1128	1345	964	2374	1119	4270	4464	804	598	4422	740	1976	1756	1261	634	1553	4670	2391	2103
Tb11.01.1470	669	4869	2786	4732	3205	3995	1259	2738	9348	1160	699	4683	1070	3373	3419	3394	2117	2894	8766	5227	3479
Tb11.01.1475	274	1370	860	1913	801	4565	1251	5087	6276	1603	1124	4635	1087	1889	1876	1089	625	1141	4176	1695	1352
Tb11.01.1480	554	3349	1976	3549	1802	12668	4999	18529	22218	5083	4565	16792	3653	5610	7263	3982	1907	5651	13422	8544	5480
Tb11.01.1490	624	71	43	10	14	192	96	57	46	43	32	23	5	53	52	11	7	50	158	18	8
Tb11.01.1500	2052	183	100	37	34	172	145	50	89	72	60	17	10	59	51	8	19	124	127	24	12
Tb11.01.1510	1448	331	320	39	56	806	304	65	110	259	180	101	19	459	412	104	77	610	1118	174	93
Tb11.01.1530	621	135	82	48	19	114	129	113	145	66	60	43	28	44	39	16	23	188	149	67	56
Tb11.01.1540	3263	758	717	116	118	689	417	142	253	134	122	103	20	151	98	31	34	377	373	83	35
Tb11.01.1550	552	140	185	36	36	467	208	108	116	16	8	8	2	83	107	103	136	64	392	43	38
Tb11.01.1560	1128	148	103	19	25	82	49	34	44	25	22	31	2	35	46	14	12	69	188	31	18
[truncated: 8,721 more rows]

## Sheet: unique ORFs
gene	Length	WT t0-1	WT t0-2	WT t30-1	WT t30-2	PAN2 t0-1	PAN2 t0-2	PAN2 t30-1	PAN2 t30-2	RRP45 t0_1	RRP45 t0_2	RRP45 t30_1	RRP45 t30_2	CAF1 t0-1	CAF1 t0-2	CAF1 t30-1	CAF1 t30-2	CNOT10 t0-1	CNOT10 t0-2	CNOT10 t30-1	CNOT10 t30-2
Tb927.1.2340	1462	65229	42417	71399	30785	177281	68974	217028	281681	60741	40967	113773	31246	53945	44780	34305	21283	109972	155959	84311	66833
Tb927.1.2330	2021	86497	48096	93384	36429	211055	77994	259879	415607	64512	40850	102328	27786	45591	41676	35685	24940	96753	156286	86935	59280
Tb927.7.2820	478	7642	7329	8249	5197	37718	14423	45317	50233	12725	10067	39410	10326	13635	14220	12215	7235	18006	42947	24668	20035
Tb11.03.0300	3977	11231	3029	13130	3448	36635	9144	46311	54175	10380	7802	60444	9184	9080	9686	6654	3322	11810	49421	21894	17682
Tb11.01.3170	1004	8097	8419	10410	7155	30421	10090	40278	44950	10512	8118	35597	7145	11213	10798	6432	3189	12371	28354	14372	11871
Tb927.6.4280	1130	14726	7052	20734	7727	29036	11517	41282	68346	14583	8672	21794	6420	7030	7316	6074	4661	28293	42761	29520	17395
Tb927.8.6150	1016	5499	4471	6986	4344	21418	8472	32253	32812	7731	6767	21460	6341	8956	9719	7191	5047	7491	26476	13395	8056
Tb927.10.14710	801	6659	4264	7252	3991	19390	7346	29852	34146	9001	7747	24492	6135	10995	10111	6971	4136	10089	19887	12182	7495
Tb927.10.5360	531	2794	2462	3968	2299	13028	5040	20673	25802	7324	4473	21906	5576	7388	9169	4830	2938	6380	18052	8124	6929
Tb927.10.2110	1350	67128	57612	93775	54350	59926	28884	59087	137377	15314	11032	12478	5567	19991	14825	19801	23926	24337	24340	13265	7618
Tb927.7.5000	859	3740	1889	5067	2042	11067	5025	17579	17483	4552	4319	14521	5067	8645	9933	6179	3339	7751	18616	11983	7982
Tb927.10.7340	414	4340	4442	6454	4587	16120	6644	21406	24015	6851	5624	15201	4852	6064	6427	5361	4055	4178	13854	7120	3361
Tb11.46.0001	1013	7055	4539	9390	4318	9197	4581	10139	17121	6029	3727	15008	4825	8511	8660	6315	4798	7892	15057	9686	5816
Tb09.211.2630	435	3263	3130	3463	3677	12778	5654	21270	25655	6563	5027	22126	4680	5412	7870	4277	2423	4535	18503	8874	3666
Tb927.6.1010	1384	10573	5555	6567	2741	29088	11389	23949	30083	13918	8464	21413	4614	24901	27039	16192	9775	28229	58448	33623	19382
Tb09.244.2730	946	6969	4311	7322	3614	12214	4198	15223	22734	6096	4706	17711	4612	8952	8540	5636	3323	9242	16762	10354	6743
Tb09.211.2650	445	4318	3287	5426	3246	12307	4678	21159	26289	6717	4844	20982	4591	7730	7934	4011	2861	5082	19438	7607	4997
Tb927.10.11390	579	3870	2844	5023	2794	11396	4152	18494	20742	6078	5152	20499	4319	6246	7009	4786	2642	4455	16418	8912	4643
Tb09.160.5580	1117	4109	2312	3844	2469	8196	2921	10474	12725	5013	3990	13936	4045	6084	7251	3959	2442	4575	17098	8476	4868
Tb927.8.6040	2474	2802	2237	3909	2309	12728	4999	20640	22999	5676	4674	22209	3647	6604	8691	3601	1908	4147	22078	7392	4098
Tb927.10.3940	771	5965	6226	8503	6183	10218	3430	9074	17008	4146	2764	14578	3537	7873	8142	6636	4318	6233	19177	11302	6314
Tb927.7.1740	774	6264	4557	7397	4326	10536	3636	10809	17081	4539	3216	16515	3521	8605	9069	5387	2901	7619	22453	12383	7282
Tb927.8.1330	850	5745	1354	6088	1387	9135	3364	8555	16875	4142	2941	15740	3336	7943	9000	5080	2567	6570	17483	9662	6518
Tb927.3.3310	672	4304	2673	5195	2763	8502	2972	8763	17482	3362	2265	14317	3014	5444	5789	4417	2490	4353	12981	7364	4589
Tb11.52.0018	6695	6588	4677	6617	4392	6689	2966	7435	13479	3206	1994	13972	2869	7413	7164	5370	3379	4951	17970	8853	6007
Tb927.5.4170	337	5067	2463	4849	2066	7231	3237	10985	13061	5762	4330	12561	2845	5961	8207	3828	2511	5677	25961	10817	4536
Tb927.1.2430	457	10720	6448	10396	4573	14874	9181	27476	35751	8477	5238	15719	2840	9595	11811	5010	3176	10706	31638	9713	7108
Tb927.6.4980	484	4270	2786	4659	2713	7257	2977	11387	13612	3939	3180	11345	2749	5482	5603	3530	2430	4089	12147	6336	3333
Tb11.02.4170	582	3897	4641	5107	4174	16028	6390	29010	32073	5765	3336	21126	2742	6115	7822	4531	2427	5355	20308	7903	5392
Tb927.10.5340	462	2634	3001	4020	2712	8927	2483	5118	9960	2274	1402	12261	2624	4528	4390	3116	1784	3198	11633	5356	4601
Tb927.10.2890	1290	8363	6310	10965	6567	26269	9205	33606	44848	6957	5547	9413	2620	5509	5379	5216	3471	7845	13189	8409	4212
Tb11.02.4350	625	4896	4008	7585	3687	8203	3025	10573	18745	3323	2075	11780	2587	5288	5716	4207	2262	5812	11249	6947	3868
Tb927.7.2340	473	3963	1976	5424	2239	6065	2087	6292	10664	2133	1906	11411	2454	4935	4951	3920	2219	3866	13261	8499	4331
Tb927.10.1090	432	3583	5787	5593	5700	4585	2024	4542	9081	1949	1312	12054	2384	5729	5749	5666	3187	4577	14839	8866	4748
Tb927.6.5120	342	734	899	1118	833	4447	2583	6883	7287	2138	1736	5666	2320	1729	2159	1538	1065	1805	6015	2633	1943
Tb11.01.7535	415	2581	2861	3510	2930	6404	2807	12345	18036	3006	2068	16150	2224	4663	5362	3302	1292	3059	16043	6266	3323
Tb09.211.3270	630	4556	4429	5306	4563	6931	3181	9637	15242	2527	1389	11001	2021	5093	5126	4328	2493	3739	13704	6833	4146
Tb927.4.1790	1443	5155	3033	6113	2745	5300	2301	4983	9563	2352	1035	9318	1975	7648	8003	5184	3220	6588	17298	8826	6412
Tb927.10.8430	429	3261	2053	4726	1949	8017	2852	11670	14271	2706	1578	9910	1969	5019	6237	2957	1805	3420	12158	5360	4161
Tb927.7.1040	706	3710	2607	4141	2637	14437	3725	14067	17212	3212	2472	14196	1949	5387	4983	3371	1382	3640	13354	6259	4410
Tb11.01.7960	805	1849	425	2238	347	5956	2596	10942	11267	2309	1959	8249	1940	2964	3435	1983	908	3347	7368	4474	3207
Tb927.3.5050	1154	7168	4526	8852	4007	9625	3374	8957	24264	2759	1568	10105	1890	7635	6111	4865	3094	7901	14490	8405	5397
Tb09.211.0110	668	4012	977	5216	1084	5396	1747	4826	11075	2082	906	10448	1885	5376	5785	4053	2154	4539	14398	7663	6169
Tb927.7.230	312	2541	1651	3240	1537	3552	1535	4860	6551	2122	1062	8725	1861	3804	3813	2642	1583	2742	7310	4194	3976
Tb927.8.3530	1150	4680	3654	5247	3460	12525	4188	19334	33885	4300	2904	8981	1833	1933	1798	1966	1277	9163	18018	11811	6818
Tb11.02.1830	470	1780	2178	2672	2125	6681	2666	9584	11690	1684	1661	5165	1678	2259	2298	2477	1535	2307	5791	3627	1897
Tb927.3.3760	1126	2141	2642	2685	2610	14834	5969	21511	24020	2959	2555	4921	1640	2238	2570	2762	2018	3458	11448	6775	3254
Tb11.02.4000	412	2384	1922	3450	2098	3958	1788	5298	7968	1873	1401	9795	1638	3426	3536	2457	1324	2427	9766	5002	2888
Tb09.160.4200	390	1153	1143	1447	1093	5042	1653	6665	7717	1474	1215	6476	1603	2236	2074	1605	802	1849	4630	2392	2221
Tb11.02.1085	837	2589	918	3075	1017	3614	2026	2684	3861	1638	1084	4128	1601	4761	5466	4048	2388	4160	11948	7266	4352
Tb11.01.3675	479	3406	2855	4270	2721	8830	2983	10499	13987	1982	1342	8298	1456	4022	4224	3365	1739	2967	11922	6034	3745
Tb927.8.4970	1856	13841	10120	12860	7754	6097	2565	3519	17891	2751	1720	4776	1370	6497	5885	6045	5046	7839	13375	7864	3621
Tb09.211.3540	1539	5713	2868	6079	2775	14565	5732	16480	26138	3503	2700	4361	1344	2187	1706	2181	2735	13601	17672	12005	5964
Tb11.02.4050	455	5253	4216	5981	4476	7370	3612	8077	10614	1358	823	5597	1343	4082	4397	4263	3456	2808	10865	6783	3586
Tb927.4.2180	508	2373	1539	3492	1579	6903	2993	11146	15864	1757	1069	6363	1237	2226	2807	2013	1078	1999	5733	2754	2158
Tb11.01.1350	1428	9524	5558	9115	3991	6672	3244	4977	8573	2826	1919	3210	1216	3284	2709	1977	1720	5711	8222	5073	2862
Tb927.10.4570	2541	27716	15138	31041	13396	7108	3286	2389	11080	2636	1901	2424	1202	5992	3447	4558	7980	5662	4797	2376	1364
Tb11.01.5590	896	2272	722	2534	644	4411	1817	3730	7630	1132	681	2505	1195	1995	2205	2660	2043	1987	4172	2968	2079
Tb11.03.0410	1738	3355	4219	4664	4176	11269	4239	14136	18047	1817	1332	4792	1170	2852	3188	3773	2589	2031	8332	4239	2190
Tb927.10.4120	338	4026	3174	4873	3125	9060	3386	14052	16860	1854	956	8220	1144	3329	3486	2414	1107	2398	10062	4088	3239
Tb927.5.1820	371	691	1064	973	905	4297	1856	7830	7780	1259	1424	5642	1111	1754	1775	1203	865	1398	6948	2540	1408
Tb927.7.1320	482	1179	1543	1415	1452	5252	1693	8899	10233	2314	1570	6935	1066	1891	2067	1451	806	2018	8451	3897	2615
Tb927.10.5480	378	1890	599	2338	591	3982	1618	5721	10368	1485	570	7107	1056	3605	3840	1913	957	2595	7920	3493	3423
Tb11.01.4621	515	4629	4188	4990	3836	8392	4534	11585	17298	1267	1167	3271	1030	1957	2457	3125	2604	2534	10751	7075	2972
Tb927.7.5180	663	1149	607	1152	566	1045	473	1270	1995	762	428	3319	1027	1409	2112	1546	1007	1066	4432	2150	1867
Tb09.160.0700	398	3500	2556	4839	2944	5235	2230	5580	8563	1153	641	7541	962	3244	4104	3944	2422	2082	13098	5860	2964
Tb927.10.13500	645	5256	3011	5432	3557	4002	1350	2848	10170	1053	674	4220	953	3383	3306	3537	2355	2853	8639	5110	2958
Tb927.10.5620	1119	11213	2151	15918	2420	10282	5330	15141	29728	2993	2344	2066	946	2434	1520	2244	3784	6544	4857	3141	1874
Tb11.02.0740	2296	1761	1780	2169	1787	7293	2398	8439	9695	1220	1023	3833	860	1676	1888	1785	1055	1145	5146	2664	1742
Tb927.3.4290	1901	16922	10888	15061	7817	4561	1829	2150	16045	1725	1019	2779	846	4945	5555	5822	5334	5880	11310	7338	3879
Tb11.01.0355	387	498	126	660	134	849	538	602	732	511	311	1644	784	934	1158	948	531	778	3299	1518	1616
Tb11.01.3600	1558	2403	2336	2386	2250	6221	2286	7341	7762	1342	1055	5831	758	2345	2239	1639	848	2104	7493	3671	2075
Tb11.01.1465	333	1374	1128	1345	964	2374	1119	4270	4464	804	598	4422	740	1976	1756	1261	634	1553	4670	2391	2103
Tb927.10.14140	1500	5201	1454	6088	1776	2613	1828	1775	4174	1421	1024	920	706	1277	1168	1506	2713	4018	5720	3072	1756
Tb11.03.0250	1286	4025	3195	5802	3205	6413	2582	9131	18653	1198	595	2546	704	1185	1477	1544	979	1895	4224	2488	1589
Tb09.211.4511	328	3061	4024	4220	4687	5302	2954	8436	17111	1315	661	4753	661	2419	3293	3061	1940	1671	11149	4744	2101
Tb927.10.12850	1149	5316	4845	6935	4855	7182	3190	6007	15555	1053	642	1601	660	2203	1998	2721	2450	4179	5563	4789	2666
Tb11.01.2680	834	2654	522	3039	540	1906	770	2057	2645	679	282	3573	625	2367	2191	1347	732	2260	4918	2070	1588
Tb927.4.1860	571	1925	1408	2317	1450	5323	1975	6171	10802	1104	751	3426	619	1334	1478	1592	945	1121	3861	1890	982
Tb11.01.7800	510	1425	856	1694	821	1982	1057	2767	3916	745	389	2298	593	920	1117	855	622	842	2637	1677	1162
Tb927.10.2440	1062	675	765	401	369	2657	1125	2378	2900	1066	874	1535	590	553	713	699	572	1540	4789	2510	1131
Tb11.02.5450	2037	4441	2739	4070	1976	3097	1937	1484	6127	1135	777	963	565	1779	1668	1796	2667	2367	2496	1717	803
Tb927.7.4770	691	1113	1059	1212	1048	3607	1301	4243	7001	1123	792	2915	556	1021	1210	910	496	996	4087	2191	1204
Tb927.10.11420	2181	344	213	74	53	296	180	66	93	403	339	1536	553	390	273	169	204	373	487	98	109
Tb11.01.4750	1599	6373	4460	7215	3626	3899	1607	2603	9991	1136	695	2367	542	2102	1942	1544	1226	1875	4221	2530	1231
Tb09.211.0120	584	2277	819	3174	871	2256	1083	1833	4732	558	280	2416	538	2314	2525	2612	1602	2072	7009	4137	2897
Tb927.10.200	576	718	1093	1062	1161	5800	2212	8448	10021	996	849	2972	531	1207	1322	1272	680	1170	3978	2165	1153
Tb09.160.2490	631	421	274	445	259	647	390	443	847	434	176	1321	527	1235	1971	1090	667	878	2978	1416	1440
Tb927.10.3380	345	835	823	1136	731	4354	1554	5192	6114	605	518	2410	522	1346	1337	790	473	1004	3368	1479	1351
Tb11.02.3210	848	1627	1660	1987	1389	4473	1854	5720	8261	964	588	1327	509	536	610	642	540	1646	3539	2360	1515
Tb11.02.3770	429	921	514	1129	485	5507	1697	5946	7479	1064	797	2441	455	1109	1556	1191	589	1405	5580	2684	1499
Tb11.01.7940	13282	2169	1385	1679	1095	2933	1239	4929	5475	859	758	3711	417	1342	1492	769	556	1383	4904	2056	1051
Tb11.01.7770	3786	979	762	185	173	1286	660	545	822	713	441	1598	414	525	477	185	119	663	1240	324	193
Tb09.211.1690	559	1589	1100	2118	1120	1876	749	1946	5203	661	368	1345	394	535	633	588	494	492	1816	1125	410
Tb927.10.13690	2055	422	577	235	295	569	325	310	755	507	337	2040	391	791	603	544	362	270	673	221	116
Tb11.01.3370	694	1198	880	1485	876	1969	844	1985	3828	608	465	1089	355	582	607	595	416	897	2068	1442	634
Tb927.10.8230	1494	4687	3158	5853	3285	5245	2248	4269	14468	588	303	1058	348	1128	1400	1429	1334	1153	2985	1516	601
Tb927.10.3280	249	1706	1705	2561	1917	2413	899	2191	6315	688	239	3609	341	1658	2552	1446	849	1249	6629	3083	1636
Tb927.8.1990	755	1336	1408	932	1132	2982	1547	3335	5862	605	477	1346	337	760	871	978	752	1067	3636	2269	976
Tb927.10.10980	2115	10725	5009	3590	1760	3560	1740	1291	4736	1385	773	899	336	2733	2434	1133	1434	4104	6454	2796	1192
Tb927.8.4890	1355	778	1291	721	968	1752	650	941	1978	567	411	1030	322	415	544	445	307	241	918	279	121
Tb927.3.5340	1289	639	481	411	248	1860	873	1945	2218	1268	1008	745	313	738	757	419	357	875	1788	804	344
Tb927.8.4430	1737	1439	1089	1795	1209	2709	1251	2785	5909	529	319	822	305	952	1053	1249	1126	2532	5170	3743	2006
Tb927.10.16100	1278	705	551	510	319	932	439	1182	2227	719	576	980	300	477	488	215	180	979	1757	915	444
Tb927.6.4500	779	980	911	1005	793	1342	659	1197	2834	412	288	1104	290	715	773	684	567	544	1741	1082	539
Tb927.10.8190	1614	2782	1837	1694	941	2761	1096	2291	4560	1032	621	1276	281	1292	1206	688	450	1267	2986	1558	816
Tb927.6.560	1107	1054	1031	857	577	2683	875	2433	4427	723	459	1387	281	1806	1695	1364	859	1718	3876	2440	1385
Tb927.10.1590	330	97	67	105	70	679	350	417	396	266	235	489	280	291	319	263	202	268	450	361	319
Tb927.10.6510	1689	656	286	556	233	537	501	224	746	330	206	287	275	1038	1297	1048	1560	1226	1277	1559	861
Tb11.01.3040	987	790	654	643	352	2902	1303	3460	4379	848	608	1337	268	535	607	446	289	1149	2540	1391	729
Tb09.160.3090	2654	3291	1451	3836	1478	1356	884	548	2090	738	538	332	266	595	370	361	979	667	454	251	149
Tb927.8.5260	272	1910	1908	3124	2104	6622	2176	7454	9971	413	189	2051	264	1250	1516	1385	919	718	4569	1881	929
Tb927.7.1780	850	782	1233	782	954	1019	348	622	1158	467	386	555	262	88	108	50	40	143	617	305	132
Tb927.3.2230	941	504	493	626	489	754	424	973	1419	508	341	658	256	417	430	396	316	691	1402	894	417
Tb927.7.4520	754	2027	1712	2364	1826	3326	1546	2374	6108	410	349	545	248	336	322	478	592	548	1327	794	365
Tb09.244.2725	345	218	68	232	65	1069	470	1327	1437	249	215	1021	247	525	583	334	153	348	930	616	433
Tb927.10.7140	1506	1235	955	941	591	2657	1040	2830	4085	773	467	1341	246	706	744	425	272	791	2488	1145	581
Tb927.2.4590	1179	2329	1946	1843	1352	5305	2160	4813	7026	939	682	625	246	621	636	561	509	1159	2070	789	400
Tb927.5.1460	1018	987	355	1152	317	1204	448	904	2470	392	260	727	245	432	470	407	343	361	1083	640	295
Tb09.211.0620	1186	3345	2881	1869	1530	2495	829	1351	3785	707	444	1159	239	2551	2878	2953	1863	2382	6659	4026	2268
Tb927.6.3740	2031	8042	6539	7999	4793	1342	991	639	3831	307	149	294	236	1627	1963	2701	3929	1879	2575	2240	1227
Tb927.6.4840	1296	5970	6168	2020	1492	5007	2224	1377	2018	2274	1714	753	234	1522	1072	292	218	2117	2804	536	320
Tb09.211.4460	584	2205	2432	1193	1212	3576	1900	3275	4414	616	484	1396	230	1750	2040	1938	1408	1535	7745	3710	1707
Tb927.5.860	1584	1245	743	1056	605	2175	1153	2356	4274	489	354	690	228	378	348	305	330	481	1152	574	274
Tb09.211.0775	1210	439	422	363	283	1300	671	1216	1587	429	322	412	225	249	346	306	361	294	1067	415	247
Tb09.v1.0380	983	682	599	449	376	2504	1042	2901	3116	617	496	887	221	537	550	480	285	1291	3651	2079	1137
Tb927.7.4480	679	508	433	436	460	2923	969	4139	4584	658	590	867	221	284	392	384	235	760	3476	1643	572
Tb927.4.410	966	544	655	282	363	1388	452	1120	1448	534	367	809	206	1014	1185	961	560	642	2247	1021	563
Tb927.5.1830	2033	8306	7603	5918	4112	4997	2430	1754	4449	1144	783	686	205	3104	1761	2168	4765	6819	5511	2744	1237
Tb927.1.2820	1985	1047	962	532	431	1910	819	1173	1129	847	813	603	196	484	502	300	230	772	1331	556	272
Tb927.1.3850	359	776	892	1109	948	894	505	1244	2962	290	196	920	195	468	670	472	448	554	1921	1130	463
Tb927.10.11300	381	1319	422	1490	597	2031	867	2272	3673	253	179	793	191	657	882	991	729	635	4673	2031	1024
Tb11.02.2310	932	632	550	408	305	1234	497	1150	2612	356	220	833	186	493	520	409	271	1001	3894	2029	929
Tb927.10.10140	996	1310	1106	1186	840	1089	477	623	2298	327	150	889	185	692	820	708	461	897	2792	1615	906
Tb927.8.2060	8850	1231	706	551	386	359	218	206	431	157	142	646	185	288	229	185	370	663	713	228	155
Tb927.7.1110	1207	1375	1333	1352	890	866	416	548	1454	400	266	558	181	375	365	345	284	427	834	446	205
Tb927.10.10390	1479	1204	1086	1019	681	2309	1145	2244	3993	573	451	741	180	903	712	532	431	1105	2006	1229	614
Tb927.6.2200	678	334	331	178	205	1701	561	1666	1919	426	369	719	180	406	427	435	343	1077	3003	1760	915
Tb927.7.1820	347	384	449	139	143	971	350	363	591	597	441	640	178	639	807	307	214	654	1972	804	398
Tb11.55.0009	780	567	434	332	205	1800	826	2306	2758	607	466	813	175	501	582	344	245	682	1507	842	516
Tb927.10.2020	1416	4034	2865	6023	3160	2844	1383	2038	8634	480	283	241	175	618	609	905	1597	3438	3329	2433	1365
Tb927.2.5160	1210	759	697	591	406	1382	593	1077	2103	371	246	464	174	531	634	393	259	485	1456	638	242
Tb927.4.1300	1323	2496	1353	2520	1070	2379	1112	1806	6187	376	246	274	174	524	472	639	790	1260	1910	1169	667
Tb927.10.14840	924	1957	1507	863	526	1479	644	819	1542	724	515	463	172	831	843	423	362	853	1915	1183	579
Tb927.10.6880	996	2043	1956	2333	1578	2251	1109	2183	5952	319	197	516	170	313	361	505	413	958	2029	1241	690
Tb09.160.0465	374	124	298	184	278	812	267	1210	1461	355	291	695	169	238	324	326	217	267	1534	677	243
Tb927.10.13940	381	28	26	17	9	53	24	52	78	146	101	630	167	108	125	93	51	31	104	28	34
Tb927.2.4800	1141	376	319	92	55	1361	619	741	781	850	662	509	166	421	400	79	52	589	1329	238	110
Tb927.5.1160	788	1010	1145	1083	871	1383	451	949	2414	339	189	604	164	427	481	442	396	612	1411	836	457
Tb927.7.7420	1769	1122	740	443	276	1226	622	380	793	479	336	281	162	764	591	603	580	1019	1054	459	293
Tb11.02.3570	1092	769	717	492	481	1340	608	986	2263	369	187	591	161	397	435	282	241	459	1565	709	370
Tb09.160.4250	719	1773	3213	1905	2742	4995	2246	3674	7931	358	192	553	159	539	692	911	901	1049	4400	2218	1281
Tb09.244.2760	699	501	444	287	192	1315	530	987	1197	520	445	525	153	792	707	499	383	663	1364	722	399
Tb927.10.6670	378	602	562	364	302	595	306	495	757	212	165	509	150	392	495	470	337	440	1397	832	439
Tb11.01.7070	753	443	458	197	220	1374	517	1168	1436	421	367	764	149	437	501	253	146	331	1585	482	206
Tb11.01.7400	1354	363	410	94	68	1381	578	751	889	562	506	484	149	523	687	248	163	603	1477	544	266
Tb927.7.6420	1467	587	1075	585	824	1997	792	1905	1960	441	390	502	149	551	667	989	776	614	2177	1096	648
Tb11.01.7500	1412	2913	1372	1883	824	3355	1364	1651	2512	561	443	435	148	1368	1505	1674	1596	1231	3538	1890	815
Tb927.3.2960	1149	825	830	1122	987	1932	825	2338	4799	436	390	255	148	189	259	437	451	888	1402	1075	639
Tb09.160.0430	2628	2833	4210	1932	2045	2465	990	794	2845	388	253	590	147	1662	1522	1295	1031	2067	4523	2138	1054
Tb11.01.1380	2892	195	195	48	43	434	191	147	188	270	222	651	144	308	252	106	74	245	569	70	60
Tb927.6.2300	1096	1435	1659	1078	1056	900	421	416	1404	292	211	293	144	333	373	335	267	505	1176	532	235
Tb927.3.2740	1198	405	393	176	150	1645	578	1534	1863	525	345	778	141	277	290	77	53	742	2041	563	340
Tb11.52.0013	1298	641	487	409	236	949	386	612	1553	362	259	532	137	548	590	374	326	626	1329	736	381
Tb09.211.0680	1381	1890	2018	1336	1209	3424	1303	2352	4943	560	306	699	132	665	785	544	382	614	2163	1066	484
Tb927.10.12260	1428	947	601	558	347	789	352	479	473	619	519	420	132	594	560	303	231	538	876	336	185
Tb927.3.4750	3812	2075	1625	674	463	2090	1667	2314	2540	917	1074	467	131	1158	691	449	824	1907	1699	785	387
Tb927.10.11410	1116	202	184	20	41	673	300	111	106	227	179	510	130	191	167	43	38	319	530	57	40
Tb11.01.2460	1227	493	198	176	81	1006	457	1049	1488	274	180	513	127	444	387	229	152	466	1424	562	380
Tb927.2.2510	853	770	602	371	313	1108	394	744	1392	429	269	596	123	464	600	364	238	900	3412	1906	1009
Tb927.4.4690	928	333	207	219	126	966	383	918	1158	379	234	478	122	264	343	151	103	300	1082	364	161
Tb927.7.1290	870	346	462	141	201	1253	482	1114	1202	538	452	382	121	473	523	369	227	467	1501	766	270
Tb09.211.2540	426	340	457	161	237	1258	457	1304	1575	311	271	420	120	279	334	268	190	219	1425	586	314
Tb11.01.2930	3777	916	668	218	215	1219	499	754	1094	358	301	342	120	410	374	251	269	626	1400	596	320
Tb927.3.4020	7341	516	307	393	198	180	123	213	333	196	137	659	120	117	70	73	118	178	216	105	108
Tb927.10.12330	609	391	348	291	182	719	376	1052	1203	329	331	722	118	402	441	136	71	230	617	298	169
Tb11.02.2470	1519	760	712	160	119	1391	617	642	1085	597	429	458	117	943	865	483	329	1175	2385	1070	501
Tb927.2.5410	4506	361	245	154	113	554	412	798	805	259	208	575	117	146	147	42	57	262	563	120	93
Tb927.3.3270	1464	1916	853	2470	927	1689	2235	2223	3201	382	410	100	117	344	216	326	1336	1741	831	497	441
Tb09.160.2540	684	336	291	90	95	953	400	632	842	334	229	454	116	216	202	99	85	474	737	363	169
Tb927.4.2000	1496	1228	1123	903	662	1113	451	604	1489	349	239	381	116	498	570	330	278	690	1419	748	282
Tb927.6.2270	795	874	897	249	227	3030	1071	1847	2331	1163	789	749	115	1116	1326	387	233	1584	4731	1170	654
Tb927.3.3770	908	697	508	155	97	1173	675	646	820	725	574	373	114	683	753	296	235	983	2051	776	367
Tb927.8.2100	502	214	300	183	133	1237	492	1402	1976	291	200	496	114	225	236	181	114	364	754	436	341
Tb11.03.0020	2700	748	569	320	259	1492	697	1041	1258	538	460	409	113	352	291	107	102	684	1380	365	169
Tb11.02.0750	1689	1229	1026	1352	739	1336	753	776	1916	216	149	232	112	597	617	525	551	465	788	613	260
Tb927.4.4380	2581	3177	2266	2703	1448	2765	1546	1370	3721	449	347	330	112	1232	717	1203	2701	4494	3784	2261	1043
Tb927.6.2740	1024	787	1069	771	902	1678	721	1694	2404	313	253	386	112	458	567	627	546	861	2840	1352	669
Tb927.8.2830	1591	251	109	105	55	855	362	950	1048	302	221	424	112	184	151	47	29	437	931	294	197
Tb927.8.3640	1301	511	495	158	117	1592	601	925	1114	444	326	593	112	393	309	95	60	729	1410	304	189
Tb11.01.5780	2937	2205	1721	2153	1490	1317	770	915	2412	350	310	271	110	630	463	439	934	882	994	568	213
Tb927.7.4920	3068	1638	1048	994	572	1968	1243	2020	2447	728	664	348	110	826	568	434	586	993	1500	602	303
Tb09.211.1360	537	407	676	447	521	1337	429	980	2033	155	142	648	109	289	315	355	188	373	974	659	371
Tb927.10.7410	1370	1189	779	1421	637	1243	755	1143	1844	425	303	229	109	441	402	376	642	714	797	496	222
Tb09.211.3970	596	223	163	123	89	893	442	1195	1223	423	316	478	108	250	298	132	106	358	815	354	162
Tb927.3.4840	3218	812	619	343	241	1299	645	1205	1183	353	300	477	108	297	249	96	222	555	1126	250	160
Tb927.6.2600	673	489	228	218	137	849	367	769	1319	305	200	443	108	250	303	191	144	314	1536	830	317
Tb927.7.5010	395	176	172	51	54	625	242	121	133	367	256	333	106	231	279	86	87	213	894	125	77
Tb11.01.0480	1751	673	673	423	320	1277	696	604	1198	290	227	441	105	591	517	426	423	823	1339	670	310
Tb927.10.230	741	403	334	119	78	901	318	437	595	390	257	415	103	701	744	365	196	639	2298	742	357
Tb927.10.4760	729	369	527	211	193	1832	727	1764	2016	498	399	360	103	292	333	235	148	355	1130	555	276
Tb11.01.5100	2184	2234	637	1848	565	1287	837	906	2521	242	202	186	102	461	405	336	481	749	1137	611	264
Tb927.7.6980	6791	1557	1224	449	363	595	569	427	704	346	250	815	102	380	389	144	202	534	779	182	102
Tb927.1.3860	4286	639	556	267	257	757	565	690	1434	228	159	326	101	285	251	156	174	478	744	288	162
Tb927.10.4620	327	139	135	122	71	868	321	1326	1304	261	173	418	101	219	303	244	180	237	784	426	221
Tb927.2.4210	1735	1174	374	649	198	1205	591	719	1706	392	256	253	101	354	320	328	311	947	1353	599	327
Tb927.3.4000	579	334	398	248	297	895	359	965	1558	251	188	420	101	458	611	494	314	326	1807	916	390
Tb09.160.3670	404	564	353	608	287	693	366	639	910	273	185	138	100	273	281	185	135	156	284	166	85
Tb927.10.14750	915	503	419	314	211	1036	585	821	953	388	445	156	100	326	261	197	220	273	476	148	83
Tb09.160.1030	1618	263	322	37	56	1460	566	836	962	516	470	472	99	459	650	394	219	325	1910	480	210
Tb09.160.4560	1353	3368	1642	3368	1684	1739	807	824	3624	170	97	262	99	833	1004	1570	1626	1991	5255	3113	1720
Tb11.01.2000	793	592	490	283	185	568	219	305	654	298	233	334	99	405	455	282	203	452	1222	622	317
Tb927.6.5100	3350	767	825	266	254	1444	646	986	1012	615	507	640	99	459	446	161	135	674	2350	827	327
Tb927.4.4700	947	737	521	447	308	1761	691	1795	3022	501	291	559	98	430	523	351	184	563	1551	674	344
Tb927.8.940	8123	3206	2338	2031	1559	900	409	778	1119	313	303	433	98	268	270	241	511	706	1565	555	290
Tb927.5.1930	837	738	521	721	400	1682	845	1544	2579	366	264	319	97	346	413	416	395	455	1109	693	262
Tb927.3.5560	387	96	182	60	107	606	256	761	698	280	258	190	96	64	77	86	103	98	415	114	56
Tb927.6.4020	469	241	137	205	154	783	348	1320	1881	234	100	263	96	136	199	159	155	276	1371	630	453
Tb927.7.300	1199	558	936	251	346	1919	793	1285	2304	444	332	326	96	193	280	109	93	375	1540	637	222
Tb927.7.3290	2075	313	328	84	88	1001	423	697	776	390	341	329	96	233	216	69	76	315	727	162	83
Tb09.160.3530	315	347	101	531	116	1280	456	2151	2800	331	168	629	95	231	308	249	190	396	1962	877	532
Tb11.01.8510	2300	1307	971	1356	697	1653	1200	1422	2252	425	380	189	95	615	493	509	941	748	741	347	264
Tb927.10.14890	2463	6001	3728	7486	4013	1728	1352	993	4361	140	103	240	95	1111	998	1693	4367	1811	2322	1324	499
Tb09.160.3270	1261	3587	3012	4888	2846	5047	2876	5745	10452	447	371	191	94	945	573	1015	1896	1512	1275	592	385
Tb927.10.2990	3015	1447	882	267	250	874	784	328	488	353	316	268	94	392	231	74	146	1225	934	161	105
Tb927.7.5070	2068	548	553	190	176	1608	604	884	957	542	462	432	94	536	440	99	66	790	1661	358	183
Tb927.8.2050	1275	517	542	172	133	1045	402	338	490	297	206	368	94	383	386	212	203	449	956	318	109
Tb927.8.6450	2071	853	635	929	689	1841	764	2512	4238	218	163	532	94	545	690	685	480	484	1676	887	577
Tb11.03.0965	2177	317	768	291	729	2367	958	2853	3114	287	251	381	93	466	640	752	550	341	2617	808	356
Tb09.160.4870	7738	999	815	315	274	329	346	293	443	91	107	236	92	145	73	57	143	483	381	106	69
Tb11.02.1190	2690	718	501	293	295	1697	787	2080	2427	550	392	707	92	398	528	436	300	486	1942	851	369
Tb927.10.14810	483	429	314	213	151	358	202	353	635	286	213	288	92	233	325	236	211	280	870	589	258
Tb927.10.9430	1134	596	486	539	313	769	359	688	1146	247	176	389	92	337	394	158	115	270	619	308	137
Tb927.1.3830	1939	1911	2369	1509	1526	2080	1276	2388	4820	300	228	185	91	291	295	476	664	1302	2328	1191	429
Tb927.10.9730	1002	598	545	334	269	903	409	588	996	502	408	244	91	319	280	135	113	386	676	154	66
Tb927.10.15760	948	1016	400	1142	378	1101	770	746	2461	214	138	169	90	237	270	368	565	483	820	547	327
Tb927.7.3410	1690	515	474	538	307	444	178	285	779	189	180	315	90	563	652	645	509	448	1412	810	363
Tb927.8.2460	930	652	423	524	318	1184	594	995	1841	214	166	237	90	275	274	295	253	250	537	350	207
Tb11.01.1400	1997	1478	1229	654	452	1494	625	634	1529	456	285	304	89	820	682	326	300	743	1099	417	163
Tb927.7.6850	4243	825	620	293	273	1222	582	470	673	341	219	415	89	259	210	130	145	473	830	262	137
Tb09.211.0540	1143	724	628	386	331	1224	417	943	1516	431	298	450	88	286	267	189	158	694	1400	674	370
Tb927.10.14760	570	754	306	921	341	958	405	1054	3398	235	138	530	88	480	632	458	319	354	1383	728	370
Tb927.4.1640	1171	431	410	241	234	1235	393	1044	1186	431	320	545	88	246	252	151	42	305	1073	286	171
Tb927.4.5010	1297	1661	1081	1761	1161	2632	1765	2280	7443	257	154	120	88	317	317	408	827	515	676	313	179
Tb11.01.5350	517	481	507	355	335	1671	572	2056	2240	219	150	1292	87	1167	1236	837	404	529	3589	1382	740
Tb927.10.12810	1521	684	807	225	258	2158	794	1040	1578	536	420	314	87	268	284	119	90	501	1570	563	266
Tb927.7.2130	2113	548	701	196	198	1121	386	547	1241	354	235	343	87	244	235	72	47	550	1453	382	189
Tb09.211.0485	1646	379	327	140	145	1221	432	1084	1047	317	231	555	85	384	411	275	148	359	1218	460	293
Tb11.02.0100	1720	1198	1696	826	979	1066	410	339	701	421	278	216	85	509	586	448	347	379	1047	478	198
Tb11.02.0730	1162	527	261	378	263	1316	589	924	1533	283	151	318	85	449	339	391	565	844	1041	659	301
Tb927.10.6640	762	307	164	184	107	301	176	249	491	181	113	126	85	189	218	212	199	212	486	288	153
Tb927.2.2390	509	158	131	120	70	375	197	621	894	192	182	312	85	137	180	107	67	219	441	298	114
Tb927.3.3450	618	685	474	815	492	734	645	760	2259	189	88	268	85	576	841	939	911	462	1839	961	540
Tb927.7.4160	1560	723	1003	673	824	2191	768	1343	2592	317	192	260	84	439	373	414	299	446	1318	486	240
Tb927.7.4180	1796	727	772	863	769	1546	726	1599	3111	156	93	250	84	405	520	595	497	508	1493	763	354
Tb11.02.5470	1283	252	335	116	125	1857	690	1939	1771	351	277	495	82	432	412	257	131	490	1387	520	433
Tb927.7.4910	1132	576	425	423	240	638	357	578	881	339	257	211	82	351	224	125	163	538	472	201	124
Tb09.211.3880	1769	735	952	290	330	1151	458	604	1163	340	238	207	81	242	212	254	252	397	1018	390	231
Tb11.01.1340	793	483	457	281	281	949	447	564	870	267	260	273	81	309	272	121	82	420	1165	350	160
Tb927.10.4260	1413	742	1255	174	242	2249	872	964	1471	468	304	337	81	646	606	612	400	801	2560	1242	608
Tb927.7.3180	1491	883	688	556	386	1826	695	1427	2191	449	330	296	81	720	654	547	449	864	1555	688	326
Tb09.211.3180	1619	768	735	514	432	1297	750	1295	2220	285	174	187	80	204	181	161	220	427	778	293	133
Tb11.01.0700	1081	770	507	845	449	1910	887	2091	2988	250	219	346	80	298	233	256	260	693	917	554	238
Tb927.10.5300	747	417	290	163	98	468	237	274	340	263	167	351	80	491	582	231	133	354	971	311	149
Tb927.5.1780	1528	922	769	194	141	1349	714	595	667	653	683	258	80	565	423	130	128	892	1260	310	161
Tb927.7.3940	1182	686	802	434	381	1191	634	1497	1997	438	320	309	80	314	308	172	109	415	730	357	189
Tb11.01.2110	915	474	535	403	363	507	281	231	722	119	70	364	78	680	680	671	556	409	1805	719	274
Tb11.47.0016	444	292	291	210	191	1016	430	1264	1442	268	198	362	78	86	105	57	37	301	1456	702	273
Tb09.160.2370	735	489	732	278	357	2183	714	1765	2152	393	233	526	77	608	653	549	268	440	1910	852	447
Tb11.01.4430	1863	429	426	117	140	1701	609	1267	1225	432	439	409	77	318	316	109	90	403	1184	324	176
Tb09.211.1300	760	282	358	35	48	1434	544	518	360	622	525	280	76	622	628	213	122	639	2110	426	270
Tb927.3.780	811	535	500	122	99	1266	510	482	566	478	485	312	76	749	907	562	377	842	2723	1077	503
Tb09.211.3610	3760	4971	5260	5908	4989	1428	707	662	4838	96	55	238	75	779	822	1248	2770	1027	2560	1006	348
Tb11.01.0625	503	188	209	61	54	644	202	231	336	192	114	250	75	249	245	110	92	220	670	268	194
Tb11.01.4620	7282	2145	2701	1096	1381	1407	685	536	1576	256	191	322	75	518	423	300	291	900	2227	739	387
Tb927.10.11400	1239	237	157	33	18	656	273	118	91	290	303	235	75	180	121	15	13	341	412	14	27
Tb927.3.1760	828	359	438	191	187	802	357	605	734	348	254	257	75	240	277	165	130	286	913	252	135
Tb927.3.860	460	461	441	550	380	1351	570	1706	1867	156	126	325	75	211	325	354	310	201	878	498	261
Tb927.4.2450	1473	874	787	766	624	1093	613	861	2198	141	112	125	75	182	257	326	355	306	588	353	174
Tb09.160.4300	1438	690	367	189	112	851	376	405	787	359	231	214	74	272	255	72	51	473	1225	250	95
Tb11.01.3380	2834	511	341	98	105	1414	554	780	830	421	348	299	74	284	273	70	48	514	1161	191	96
Tb11.02.4420	2070	1428	1298	981	849	2150	869	1157	2217	322	236	362	73	481	434	380	374	1021	1380	580	278
Tb09.211.0350	718	154	87	85	62	366	129	391	617	211	108	198	72	75	98	37	40	248	993	403	261
Tb11.01.1990	1176	282	196	98	69	1288	680	1157	972	332	326	240	72	246	256	129	108	436	927	279	135
Tb11.01.3270	3036	466	382	233	166	1157	474	679	831	374	290	374	72	369	402	241	131	465	1538	489	320
Tb927.10.11030	303	127	126	142	60	756	330	682	738	142	152	212	72	145	189	140	88	160	395	193	124
Tb927.6.2170	683	370	378	298	263	335	126	187	569	73	63	154	72	193	234	214	189	144	466	238	147
Tb927.6.4180	659	271	215	118	158	900	354	875	1412	205	170	295	72	89	118	83	35	204	1192	539	192
Tb927.7.3620	2802	668	338	284	161	648	372	426	861	213	159	269	72	389	357	126	153	567	839	376	143
Tb09.160.2070	1101	383	184	152	86	729	352	466	653	315	245	204	71	210	217	113	90	392	815	279	123
Tb927.2.5850	425	214	164	59	49	1075	351	871	1040	381	209	407	71	302	294	111	83	270	1176	333	277
Tb927.6.4470	1048	559	528	570	338	655	306	479	941	93	74	261	71	174	187	151	181	359	575	316	149
Tb927.6.5050	757	360	518	163	203	1676	647	1455	1652	415	336	439	71	315	369	215	132	438	1134	402	208
Tb09.211.1290	1050	386	375	55	90	1719	612	633	640	613	611	308	70	333	346	82	64	409	1256	187	121
Tb09.211.1750	1991	1068	541	565	304	1148	523	792	1363	335	260	167	70	271	285	220	201	374	700	297	160
Tb927.10.15730	10383	753	293	397	241	147	68	67	158	62	41	239	70	91	71	112	421	164	211	89	75
Tb927.3.3500	1865	447	373	255	229	931	369	590	1201	304	184	403	70	297	314	156	160	415	1079	422	224
Tb927.7.6760	4625	464	342	129	116	624	401	405	430	226	172	316	70	265	192	62	55	219	396	58	54
Tb927.8.4700	1599	859	862	241	276	1378	523	583	653	232	219	378	70	410	439	147	118	371	1215	343	136
Tb927.8.5880	599	660	556	187	163	749	276	272	578	338	211	135	70	640	813	460	397	458	1390	570	237
Tb09.211.1370	2354	681	874	232	240	1151	421	378	616	400	316	354	69	503	573	265	171	648	1543	478	243
Tb927.10.12010	396	296	331	234	233	798	288	644	1260	109	141	207	69	207	224	231	199	254	1055	420	196
Tb927.10.3030	918	740	806	70	102	1929	745	161	151	528	364	323	69	760	826	192	103	888	2473	149	106
Tb927.3.960	383	257	248	309	237	660	196	758	1536	132	119	380	69	97	181	121	71	102	618	364	145
Tb927.7.2290	684	517	556	337	360	1510	563	1043	1269	398	210	377	69	356	416	242	158	375	1103	254	119
Tb927.8.1170	1392	1022	1148	579	407	952	369	525	1467	263	175	332	69	542	609	315	210	572	1568	674	276
Tb11.03.0660	2245	315	375	121	128	1445	451	397	448	351	274	244	68	177	215	74	33	240	993	155	69
Tb927.10.5770	2343	1693	1195	1563	951	977	855	345	796	238	228	61	68	532	465	555	1538	781	847	402	163
Tb927.2.5660	952	410	371	241	195	1266	528	1330	1608	383	275	316	68	202	192	100	87	408	865	302	153
Tb927.3.3160	2132	202	132	169	144	717	270	787	1032	233	142	439	68	184	209	156	67	274	854	330	185
Tb927.4.1580	709	276	237	53	64	686	219	337	423	266	180	231	68	228	216	74	64	275	697	190	144
Tb09.160.3730	1884	1071	772	433	254	1711	608	702	1307	572	353	381	67	901	813	354	255	1060	2195	731	404
Tb11.01.5170	419	171	54	144	44	227	106	188	484	142	102	200	67	158	186	101	70	108	384	165	58
Tb11.02.0870	527	442	325	385	235	451	173	355	548	248	170	205	67	239	293	180	176	275	705	391	141
Tb11.02.3740	4873	797	495	251	206	901	529	318	475	189	145	224	67	225	161	74	145	324	497	144	89
Tb11.03.0030	2055	1146	1259	678	528	1423	605	586	1334	253	173	225	67	301	298	139	126	533	1113	292	118
Tb927.10.13720	1134	430	281	386	233	630	359	540	948	134	79	130	67	228	263	226	282	203	426	236	131
Tb927.4.3450	436	186	243	147	122	712	318	886	838	195	186	343	67	213	259	207	117	293	834	536	222
Tb927.6.1820	749	159	315	85	130	939	312	634	637	313	205	521	67	255	261	99	55	313	1302	400	222
Tb927.6.4260	1005	395	512	162	196	1679	664	1190	1131	443	377	293	67	446	392	221	170	638	1524	634	335
Tb927.6.4440	1099	1015	960	957	665	799	497	473	770	208	162	162	67	568	396	382	543	626	622	285	156
Tb927.7.6960	2869	648	593	282	337	1303	513	1090	1566	278	185	219	67	397	450	364	270	396	1196	411	231
Tb927.10.11330	687	319	339	165	156	490	233	325	747	173	133	254	66	471	508	418	280	412	1217	777	374
Tb927.3.930	14201	9946	5476	6375	3656	457	329	268	802	67	40	205	66	366	347	256	1241	1162	1581	677	163
Tb927.7.3870	834	293	361	142	149	655	202	104	158	222	143	441	66	276	352	165	93	167	861	86	52
Tb927.7.4790	853	748	449	412	167	640	238	299	874	287	112	471	66	518	628	380	218	547	1898	868	447
Tb927.8.1300	3897	448	216	114	116	396	230	381	513	210	203	238	66	202	187	140	112	231	637	180	150
Tb09.160.1260	1661	431	323	50	70	1619	586	315	313	484	388	262	65	514	571	172	96	626	2317	257	182
Tb11.02.2080	2882	509	528	118	113	874	406	121	187	323	222	266	65	278	190	53	54	616	778	71	52
Tb11.02.5020	1542	885	726	584	356	458	305	392	702	219	162	192	65	410	350	249	264	507	701	381	167
Tb927.10.13860	960	565	405	279	221	481	191	156	386	196	98	253	65	247	219	131	80	253	653	214	116
Tb927.10.4640	1467	635	480	306	203	403	120	135	473	125	78	212	65	510	572	345	223	306	1003	405	185
Tb927.10.7570	1356	800	387	769	305	506	276	488	687	138	102	123	65	218	198	189	256	334	445	286	149
Tb927.5.3070	1970	630	399	291	199	1123	518	698	1223	302	224	288	65	235	221	104	79	521	741	315	129
Tb927.5.630	3174	559	577	410	270	938	559	549	713	158	120	136	65	435	632	757	1246	478	1091	604	423
Tb927.8.2850	1761	192	171	39	53	449	152	111	152	125	76	182	65	125	88	49	41	175	402	86	60
Tb09.160.1760	1231	398	373	190	140	1146	344	510	608	317	190	448	64	289	323	82	46	544	1543	353	230
Tb927.10.4450	774	704	510	330	276	981	408	816	1235	273	210	283	64	317	390	185	128	335	1122	556	216
Tb927.10.6960	963	509	348	172	100	655	235	211	435	311	178	275	64	389	309	213	154	643	986	369	308
Tb927.2.3340	673	121	109	140	84	476	175	692	1008	105	65	300	64	158	189	159	86	197	720	448	203
Tb927.4.4050	2207	1280	1478	574	529	1431	499	664	1659	370	240	262	64	309	267	106	104	591	969	363	165
Tb927.4.740	1296	599	696	190	189	1189	363	431	640	423	351	284	64	244	228	92	60	419	871	222	101
Tb927.5.2570	2300	2037	1830	1021	822	2320	975	1088	1818	423	345	165	64	541	485	319	360	556	952	231	111
Tb09.160.0380	381	266	354	135	135	971	277	599	553	327	263	400	63	416	429	186	90	296	1307	311	178
Tb09.160.5570	1801	355	357	50	70	1512	592	294	314	572	456	260	63	129	152	39	19	365	643	75	35
Tb09.211.1350	1132	642	679	209	233	1011	439	589	968	431	256	369	63	584	641	243	165	672	1768	699	323
Tb11.01.5300	1338	442	433	335	339	659	351	492	1004	153	93	166	63	296	364	464	334	348	784	582	277
Tb11.01.8120	488	159	173	142	89	789	308	1046	1079	161	117	395	63	150	146	48	36	364	1373	392	267
Tb09.160.1660	301	101	146	122	94	290	143	298	371	127	102	274	62	102	115	87	48	181	341	205	84
Tb11.01.8480	1381	461	453	133	126	623	508	706	674	441	442	182	62	315	198	169	272	392	459	264	133
Tb927.10.8980	510	834	969	598	592	1356	668	961	1407	206	170	195	62	182	267	246	237	310	1114	540	275
Tb927.4.3580	905	286	223	108	103	1008	347	852	935	417	284	469	62	354	396	104	76	393	1827	371	241
Tb927.5.2030	1318	252	195	90	57	438	239	349	456	168	97	237	62	75	52	34	33	171	213	78	50
Tb927.5.3210	576	247	309	177	256	1066	472	1094	1932	125	120	67	62	74	116	105	102	95	400	204	65
Tb927.6.1570	962	457	407	213	160	675	304	478	1280	240	135	287	62	172	153	134	88	658	1676	982	460
Tb927.7.3750	1072	360	380	60	54	1207	490	765	791	450	355	201	62	247	238	95	62	375	795	207	116
Tb927.8.1550	2609	1371	580	1206	448	804	663	496	1289	158	117	121	62	336	258	327	587	641	617	390	180
Tb927.8.2210	1110	303	294	183	118	393	149	256	708	124	93	256	62	149	130	72	53	225	443	249	130
Tb09.211.2570	1788	1821	1620	1863	1282	551	396	290	1207	135	87	105	61	524	466	541	1103	565	644	352	181
Tb927.10.14790	1149	1514	795	1473	609	304	164	141	559	138	88	170	61	556	608	556	615	438	815	577	286
Tb927.2.5500	1392	418	272	149	94	510	334	659	770	294	254	374	61	605	592	627	613	702	958	777	448
Tb927.4.400	1683	529	518	261	345	454	160	307	957	187	151	212	61	412	486	351	270	251	1368	528	200
Tb927.7.6100	756	184	125	71	69	402	142	349	468	180	177	151	61	77	103	48	55	105	392	186	61
Tb927.8.730	798	837	736	870	661	660	294	447	1161	139	97	143	61	201	283	265	293	131	309	156	77
Tb09.160.3710	879	823	952	664	580	637	378	350	836	117	111	110	60	152	196	189	188	320	689	348	174
Tb11.02.4440	1825	602	125	339	95	342	333	217	295	128	101	86	60	361	277	291	501	594	607	475	200
Tb927.10.13530	345	251	403	269	328	1074	396	1380	1322	145	97	387	60	191	223	193	99	277	1359	525	345
Tb09.160.1980	1753	296	452	95	129	1046	503	771	807	164	143	179	59	143	179	159	129	243	844	393	162
Tb09.211.1250	923	599	574	144	98	1177	470	488	502	559	437	265	59	614	572	330	191	657	1370	481	269
Tb09.211.4820	1442	197	115	122	56	455	320	290	422	248	201	150	59	192	158	108	151	380	443	166	114
Tb11.03.0335	897	653	539	480	337	270	178	225	685	199	118	144	59	196	255	168	144	194	476	319	131
Tb11.12.0017	1600	621	334	129	92	685	263	590	778	263	184	334	59	536	593	433	404	413	1348	383	241
Tb11.50.0007	323	819	1581	994	1620	2690	1495	4074	5409	151	112	382	59	226	306	415	328	372	1871	792	368
Tb927.2.5250	1214	423	378	97	94	837	335	333	524	312	228	230	59	312	262	92	91	437	940	336	185
Tb927.3.5010	890	361	194	158	107	298	138	268	729	160	113	176	59	166	217	137	105	212	649	289	135
Tb927.6.1860	1029	126	117	21	20	37	31	16	39	68	23	217	59	128	121	100	131	53	167	67	41
Tb927.7.3230	2737	345	215	94	54	377	411	149	234	141	178	236	59	60	68	20	33	254	205	45	27
Tb11.01.4930	2448	459	390	126	148	834	378	462	605	249	196	191	58	183	172	60	89	245	628	137	51
Tb927.10.15800	1203	235	188	42	42	860	300	84	106	297	217	180	58	135	163	30	11	205	662	63	33
Tb927.10.8540	1011	262	159	58	40	685	289	219	239	540	502	202	58	593	733	444	286	528	1522	509	197
Tb927.4.560	12975	5584	3763	3504	2427	433	225	205	737	63	48	165	58	224	224	156	694	1114	1849	635	174
Tb927.8.1940	1902	548	705	138	204	1670	520	633	1169	395	213	372	58	460	504	196	120	586	2228	709	383
Tb09.160.1160	2505	4059	2650	4327	2339	1351	930	709	4299	112	62	164	57	557	615	758	1743	1342	2581	1094	447
Tb927.10.10770	1857	407	264	261	177	373	179	250	356	221	120	134	57	203	139	110	115	222	253	139	63
Tb927.10.2530	669	442	417	238	167	776	425	594	585	240	205	164	57	222	218	100	109	281	660	266	111
Tb927.10.4840	543	210	97	90	36	606	229	307	390	167	123	216	57	258	266	207	160	328	614	307	194
Tb927.2.1700	2641	616	401	185	113	1007	595	595	809	310	251	169	57	523	326	186	251	684	953	327	146
Tb927.6.3600	1404	478	682	181	204	967	393	430	941	229	147	315	57	289	303	172	137	404	1319	526	277
Tb927.6.4430	2325	861	1289	464	670	1148	645	351	510	523	397	187	57	880	672	410	577	833	1584	457	241
Tb927.7.6810	4764	437	354	132	151	1155	470	504	667	285	221	246	57	252	289	104	72	204	594	127	57
Tb927.8.5450	1653	1069	1262	526	520	2633	862	1322	2013	488	321	370	57	919	834	513	360	1399	3922	1277	717
Tb927.10.11160	732	206	184	46	36	516	232	262	273	170	114	132	56	72	65	8	11	133	272	39	20
Tb927.10.12960	693	576	487	285	257	1237	543	1146	1627	295	210	176	56	594	830	861	598	517	1629	910	417
Tb927.10.15140	375	258	187	179	74	549	176	416	682	143	105	354	56	324	388	229	99	306	1153	514	341
Tb927.3.1380	1688	1461	560	993	366	1481	733	782	1240	357	324	152	56	433	282	253	498	803	705	406	204
Tb927.5.1360	615	209	281	122	266	1127	377	1387	1456	200	127	361	56	69	79	32	23	172	998	313	134
Tb927.6.4780	2825	893	987	398	368	1270	591	490	1121	280	200	212	56	340	326	145	163	513	1361	372	140
Tb927.7.250	2569	486	667	104	148	1044	428	551	538	296	188	250	56	257	235	78	51	363	1092	191	109
Tb927.8.1750	569	76	40	48	20	166	117	200	173	140	130	56	56	60	64	42	57	79	75	79	50
Tb927.8.6850	870	318	318	138	149	1006	432	442	538	278	211	140	56	200	216	79	55	293	668	128	59
Tb11.01.8775	1737	211	258	43	65	826	314	363	320	281	250	160	55	254	299	141	103	249	1292	325	169
Tb11.02.5770	549	615	587	724	531	594	355	793	1404	166	100	177	55	202	172	214	275	266	457	327	156
Tb927.3.4850	2523	338	417	70	91	1105	374	254	363	386	228	289	55	331	301	79	55	415	1268	227	155
Tb927.4.2310	2241	1720	1195	1328	721	705	543	357	976	134	94	98	55	214	167	106	157	243	330	115	55
Tb927.4.3560	1240	558	440	103	94	788	329	331	478	258	201	244	55	207	242	104	82	323	1060	232	124
Tb927.4.700	1066	139	136	21	28	711	298	92	105	334	263	202	55	151	208	28	24	272	992	84	63
Tb927.5.4150	1264	394	275	141	114	865	323	449	844	307	151	313	55	384	351	187	129	480	889	280	199
Tb927.7.1300	1357	1969	1779	2261	1855	1447	598	1149	4449	146	100	120	55	202	216	325	466	515	989	582	237
Tb11.01.1290	1162	3477	2914	4242	2763	1325	793	896	4875	118	79	189	54	505	541	770	772	981	1770	1042	618
Tb11.01.3530	1254	442	292	61	33	1032	404	427	400	304	256	200	54	271	253	58	30	332	747	84	73
Tb927.10.11700	537	415	356	322	205	601	277	487	744	173	179	71	54	84	85	74	77	112	262	140	43
Tb927.10.13560	1149	328	198	78	52	565	200	116	169	257	156	197	54	232	206	79	62	306	677	176	86
Tb927.3.1420	10779	1336	803	667	468	263	212	120	314	70	64	145	54	177	106	75	261	356	396	145	79
Tb927.3.2650	253	96	112	57	85	812	265	860	806	130	134	136	54	60	81	75	56	124	554	233	140
Tb09.v1.0130	1998	534	410	104	85	1132	451	277	386	401	241	202	53	357	386	91	60	569	1459	269	136
Tb11.01.2780	1214	347	229	86	69	507	270	256	450	183	112	186	53	162	116	35	26	244	302	94	53
Tb11.01.4820	2146	486	379	169	145	949	466	466	657	279	190	157	53	212	236	95	115	285	773	190	121
Tb11.50.0002	1324	817	997	112	144	1535	636	365	616	461	279	253	53	546	655	218	114	860	2492	388	197
Tb927.1.2985	318	62	56	47	21	519	196	885	956	85	47	333	53	106	114	55	41	99	426	171	110
Tb927.10.15910	1830	900	1167	680	682	1729	668	1415	2067	310	246	166	53	225	204	156	165	353	722	260	128
Tb927.4.1080	2042	1136	790	987	501	1044	680	799	1568	213	203	148	53	276	215	232	464	601	681	360	154
Tb927.5.2940	1687	953	1100	576	603	871	353	391	1565	188	111	163	53	416	393	244	268	471	1074	541	294
Tb927.7.5840	905	295	301	239	247	526	180	505	864	123	102	236	53	166	244	167	101	139	645	358	128
Tb927.8.7100	6744	2619	1747	3197	1953	517	799	436	1309	99	111	152	53	365	272	245	1775	1389	988	504	244
Tb09.244.2840	642	259	281	172	147	807	322	1020	1216	163	99	223	52	195	237	181	134	208	740	364	192
Tb11.01.2800	1155	876	235	793	209	369	280	390	648	190	120	99	52	232	248	207	337	335	483	283	142
Tb11.01.4190	1412	216	156	31	21	835	395	290	269	262	237	195	52	203	266	58	30	385	1067	167	108
Tb11.01.7090	701	197	153	39	22	726	300	589	595	351	221	277	52	166	176	33	22	252	802	136	90
Tb11.03.0240	4038	2301	1801	2548	1410	1025	851	540	2768	188	132	190	52	556	372	425	937	1028	1246	445	206
Tb927.2.6070	902	198	118	112	63	575	241	330	442	244	149	265	52	363	489	254	132	421	1363	416	228
Tb927.8.1880	603	163	107	32	28	381	159	195	278	129	89	134	52	96	98	40	23	139	368	115	74
Tb09.160.1090	3847	1211	1036	307	273	853	445	345	548	261	174	206	51	280	183	94	94	602	758	148	83
Tb09.160.3820	1506	824	592	364	213	537	286	253	524	110	82	92	51	270	217	124	155	244	457	151	58
Tb09.160.5200	2019	985	426	714	313	856	466	567	1216	186	119	180	51	387	435	389	392	375	1545	587	286
Tb09.211.0690	1103	434	298	205	108	622	344	491	675	292	233	151	51	282	251	112	112	363	602	148	85
Tb09.211.0820	1918	338	371	40	68	691	321	83	142	268	203	212	51	142	111	17	23	160	344	52	25
Tb09.211.1220	1232	518	668	133	135	1189	393	355	589	385	273	275	51	539	697	356	194	556	2025	749	340
Tb11.01.7610	3890	889	1023	143	152	961	644	321	461	257	236	235	51	371	256	123	171	867	935	160	118
Tb927.10.14500	1014	1117	697	900	503	784	379	462	1379	195	161	165	51	254	201	151	254	428	574	213	106
Tb927.10.6030	801	517	419	193	165	907	338	463	692	289	251	221	51	349	307	247	161	393	930	373	218
Tb927.10.8390	11166	2313	2059	1021	1182	480	349	242	724	75	77	206	51	338	195	172	444	847	930	277	147
Tb927.3.4680	1496	1049	713	598	384	1067	497	553	1114	394	263	141	51	666	754	798	625	731	1494	780	336
Tb927.3.5640	1638	252	234	45	63	735	258	275	523	184	112	199	51	157	174	62	49	346	906	227	139
Tb927.4.2020	1742	350	225	88	114	882	366	519	654	200	196	184	51	292	199	83	54	417	858	167	64
Tb927.5.1790	2409	1037	935	151	111	2788	1128	377	463	1288	1005	236	51	611	455	57	43	1150	1472	132	95
Tb927.6.700	2954	1217	790	774	410	838	889	967	1594	230	227	145	51	191	129	77	204	479	421	247	104
Tb927.7.1170	616	205	170	27	27	627	281	231	218	245	213	158	51	219	242	70	43	347	899	162	122
Tb927.7.2990	1803	707	843	103	141	1950	763	815	811	684	596	374	51	487	526	162	88	725	2825	470	266
Tb927.7.4230	779	551	673	254	268	964	407	541	934	325	165	247	51	563	635	445	325	464	1140	498	232
Tb927.7.4570	1108	628	332	582	205	678	448	691	1599	161	143	91	51	133	117	145	173	434	651	266	116
Tb927.7.570	622	495	507	279	259	899	357	862	1436	186	120	360	51	280	348	176	129	295	1451	673	223
Tb09.160.1640	213	106	81	76	65	262	134	266	417	79	96	163	50	65	74	39	26	91	298	136	64
Tb09.160.5280	2232	385	417	58	43	1054	355	121	128	175	105	214	50	212	169	16	19	363	532	59	43
Tb09.211.2900	1560	982	1082	118	169	2499	927	446	509	651	526	289	50	702	657	90	62	1043	2957	355	219
Tb11.01.4520	503	304	215	137	76	516	249	466	577	235	192	220	50	199	232	87	56	212	602	309	125
Tb11.02.5280	2541	2171	1533	2205	1347	1424	775	1341	2558	241	164	328	50	479	476	527	961	601	1283	485	247
Tb11.03.0090	1264	826	698	625	462	1606	695	1186	1860	275	151	82	50	347	297	441	439	946	1559	884	454
Tb927.10.5950	1485	1727	2091	481	506	1332	541	405	1093	218	157	181	50	751	782	645	472	1051	2722	1088	502
Tb09.160.3880	612	130	149	24	24	827	332	403	342	253	220	218	49	119	121	39	17	252	726	142	99
Tb09.211.0460	456	273	250	119	125	722	299	823	911	196	158	363	49	318	330	182	102	423	1527	667	305
Tb11.01.2830	870	129	195	53	43	567	260	192	249	115	72	190	49	110	146	26	18	181	613	108	54
Tb11.02.2520	1270	735	492	439	276	596	306	325	616	321	236	153	49	283	177	89	146	336	339	168	82
Tb11.02.4160	794	141	124	14	23	641	299	90	105	290	213	160	49	265	309	28	18	278	934	47	40
Tb927.1.580	1654	596	827	223	232	1054	418	236	430	172	111	202	49	469	503	502	435	419	1058	203	131
Tb927.10.15180	1101	892	541	528	340	422	292	428	880	192	131	138	49	279	238	213	266	307	490	274	100
Tb927.2.5540	7758	962	559	450	370	854	403	357	515	181	193	215	49	220	166	90	200	343	543	160	84
Tb927.3.1350	2443	614	477	96	72	389	204	118	192	154	113	133	49	196	103	24	40	255	246	57	42
Tb927.4.1920	2848	644	608	229	184	836	510	396	772	241	205	173	49	327	236	116	209	477	593	196	94
Tb927.5.2430	2186	757	908	113	173	988	427	181	263	346	270	169	49	628	757	444	317	775	1898	708	298
Tb927.6.2480	1161	302	235	51	39	1403	490	442	416	373	313	188	49	288	265	38	14	442	1172	145	81
Tb927.6.440	1254	600	503	369	303	650	391	636	1502	205	153	81	49	133	112	121	219	248	425	233	86
Tb927.6.750	2676	447	436	130	163	1117	532	520	815	256	183	200	49	177	202	64	50	282	953	209	101
Tb11.01.1190	1581	507	392	182	144	1041	411	491	825	249	138	141	48	305	362	258	209	355	1175	364	196
Tb11.02.5670	809	277	259	95	107	1092	359	524	599	295	248	237	48	106	133	32	27	206	593	143	86
Tb927.10.5080	1233	457	443	144	131	2028	768	1152	1258	414	290	223	48	363	329	165	126	501	1238	361	194
Tb927.3.2420	459	393	349	368	245	678	371	618	1109	144	75	344	48	362	471	439	288	291	1083	574	359
Tb927.4.3400	1830	722	525	274	190	867	358	152	236	270	199	155	48	401	281	119	176	322	442	67	27
Tb927.5.1210	1213	472	208	544	251	566	420	526	772	82	90	63	48	122	135	157	185	154	255	102	62
Tb927.7.5520	993	196	187	54	46	671	289	572	622	320	245	174	48	133	117	38	35	203	456	149	55
Tb927.8.3600	1023	110	89	29	35	260	99	87	106	214	152	247	48	129	125	26	16	94	312	76	43
Tb11.02.4040	4632	758	427	358	228	566	252	460	579	230	194	301	47	293	257	101	259	433	921	232	133
Tb927.10.1280	522	157	188	63	76	400	171	205	328	159	110	120	47	83	97	61	29	169	395	201	119
Tb927.10.6550	723	276	154	86	52	491	236	386	389	305	291	135	47	257	270	96	58	277	672	248	101
Tb927.10.7500	903	142	123	105	87	252	152	199	278	77	60	115	47	185	215	247	223	132	288	156	83
Tb927.3.710	2978	97	162	42	112	711	262	553	676	242	181	378	47	123	186	49	40	189	1106	201	99
Tb927.4.1600	887	172	126	36	48	557	254	441	559	152	140	101	47	52	63	31	22	114	512	205	58
Tb927.6.590	376	192	176	114	97	448	212	542	627	201	170	207	47	154	166	108	68	166	540	289	122
Tb927.7.1600	1254	302	198	159	103	680	274	272	410	197	160	145	47	134	118	37	24	198	513	74	46
Tb927.8.2800	1109	300	176	23	25	592	250	70	79	241	193	78	47	253	276	75	99	371	589	71	47
Tb09.211.1680	987	220	308	187	147	579	259	307	707	216	211	236	46	240	262	203	171	227	937	364	112
Tb11.01.1370	1225	1187	1319	475	403	628	241	166	521	253	168	322	46	542	607	225	142	272	943	387	168
Tb927.10.11100	1707	346	232	88	82	330	158	69	128	62	27	146	46	85	72	37	27	180	299	38	37
Tb927.10.13670	1419	661	553	448	318	887	452	534	972	119	91	125	46	164	141	48	46	228	481	143	78
Tb927.3.1330	4327	797	436	177	147	801	552	198	261	185	191	156	46	156	90	57	71	460	433	97	68
Tb927.3.1360	1866	395	302	58	48	600	256	118	158	211	146	153	46	129	102	21	24	275	432	48	40
Tb927.5.2770	1461	431	305	204	129	862	396	934	1335	276	215	259	46	401	356	146	105	357	724	244	95
Tb927.5.3220	834	405	582	327	426	1371	538	1454	2084	261	230	149	46	245	309	363	246	231	645	240	142
Tb927.5.4540	3732	861	802	337	346	913	338	374	826	182	94	292	46	308	198	189	159	408	649	278	215
Tb927.6.4010	668	252	330	397	319	1404	483	1544	2545	152	83	465	46	251	382	294	235	216	1147	625	296
Tb927.6.4490	504	137	137	84	58	396	196	359	358	146	109	71	46	61	49	15	17	182	202	131	75
Tb927.7.7340	2134	256	203	55	57	705	363	569	556	206	182	230	46	144	109	48	34	269	497	145	93
Tb927.8.1520	1179	202	179	51	31	629	275	218	248	366	334	142	46	115	75	14	9	266	467	51	20
Tb927.8.1740	2208	517	399	173	107	1091	570	643	623	259	211	145	46	242	181	85	78	480	448	181	86
Tb927.8.1950	2906	302	490	123	243	410	225	209	341	124	98	282	46	194	309	233	219	245	761	281	119
Tb09.160.1490	1218	299	399	151	203	2374	730	1087	1254	340	376	201	45	132	177	135	90	186	1316	148	96
Tb09.211.4450	1160	356	308	52	54	907	377	442	323	359	287	207	45	168	182	25	28	323	756	86	44
Tb11.01.8590	873	315	201	130	93	1168	386	755	919	230	186	176	45	220	166	116	85	299	817	272	138
Tb11.02.0140	902	410	330	145	104	624	228	333	588	272	179	172	45	255	245	98	66	302	759	158	108
Tb11.02.0760	14046	8900	4440	8259	4056	467	205	168	575	30	19	204	45	302	348	214	1203	755	1410	628	167
Tb927.10.7680	1593	774	462	202	134	1013	603	566	641	313	264	113	45	222	182	116	121	292	497	123	74
Tb927.10.8780	6510	1353	653	384	274	287	167	133	319	70	36	129	45	184	145	83	258	389	685	198	107
Tb927.3.3690	1753	706	271	524	166	386	214	225	811	108	78	101	45	192	159	147	188	393	491	330	153
Tb927.4.460	1960	269	313	69	137	744	316	260	299	191	144	134	45	165	168	68	49	292	1256	245	146
Tb927.7.4680	947	115	71	78	63	335	115	419	587	113	66	235	45	209	209	133	97	140	470	321	157
Tb927.8.3490	3268	729	685	132	190	539	209	339	423	144	117	196	45	237	213	92	77	349	907	210	134
Tb927.8.6520	1305	239	258	28	32	184	92	54	85	48	45	113	45	81	68	16	22	147	251	38	17
Tb11.01.2820	713	189	157	54	24	404	196	127	176	193	117	165	44	332	324	109	57	295	593	132	71
Tb11.01.3030	705	196	87	61	20	363	161	283	272	214	165	248	44	226	236	71	52	245	825	253	136
Tb11.01.3540	1853	387	328	50	52	896	384	207	309	195	198	177	44	167	104	32	20	307	538	70	38
Tb11.02.0290	1561	1188	1016	1426	1031	1026	480	817	1364	115	79	105	44	166	201	241	301	177	318	139	67
Tb927.10.11130	2956	397	346	91	81	251	199	108	141	92	92	171	44	141	83	27	50	257	300	72	33
Tb927.10.11470	4086	509	297	186	113	341	322	116	279	110	91	109	44	127	88	47	72	343	340	67	56
Tb927.10.12270	807	63	30	24	17	125	81	66	101	84	65	127	44	35	34	4	15	64	76	32	23
Tb927.10.13930	999	224	99	34	33	1016	341	358	397	207	146	156	44	91	102	15	7	245	1051	208	138
Tb927.10.14740	1158	375	320	43	53	604	252	82	147	421	226	147	44	566	761	232	189	612	1596	362	226
Tb927.10.170	1284	722	648	338	316	797	365	281	774	216	124	198	44	606	792	495	285	434	1324	652	267
Tb927.10.3020	2322	664	410	131	137	872	567	128	244	308	190	158	44	213	144	47	45	642	653	103	62
Tb927.10.9080	1923	1153	1197	852	703	1028	470	540	1021	191	115	151	44	674	643	987	900	802	1539	811	412
Tb927.3.3610	1285	362	124	37	18	905	434	390	346	381	259	150	44	252	256	74	76	549	988	359	205
Tb927.7.5220	5364	513	281	183	151	267	227	196	309	103	78	163	44	107	79	44	89	293	316	102	65
Tb927.8.2780	2281	353	205	358	170	674	340	655	655	106	76	264	44	170	157	73	151	207	785	229	113
Tb927.8.4960	4990	603	455	128	123	210	195	166	252	117	84	120	44	100	63	42	45	209	205	56	40
Tb11.01.1820	882	335	248	164	136	723	343	434	485	387	301	168	43	221	201	85	94	290	729	265	110
Tb927.10.10750	4713	958	796	230	230	638	467	319	520	141	113	211	43	220	144	64	117	569	556	126	80
Tb927.10.6490	486	402	211	266	140	514	206	361	565	150	109	149	43	295	342	190	201	242	844	389	149
Tb927.10.8170	3978	900	670	149	167	537	335	107	241	79	65	147	43	258	157	68	95	534	747	96	72
Tb927.7.3930	4359	511	351	119	109	377	391	113	180	88	79	105	43	128	102	44	54	347	414	85	51
Tb09.211.2590	822	517	364	294	173	639	257	647	971	263	121	264	42	473	473	302	237	394	991	475	239
Tb11.01.2840	1075	147	121	66	43	732	254	371	452	168	124	223	42	100	64	19	7	178	428	91	73
Tb11.01.3770	1186	266	180	39	26	759	330	200	255	286	179	190	42	196	175	31	18	358	796	133	57
Tb11.01.4110	1525	95	30	18	21	257	131	80	68	121	55	68	42	82	67	23	30	137	143	49	32
Tb11.01.8770	4501	911	491	767	412	466	328	103	349	147	104	109	42	234	212	228	989	617	933	455	211
Tb11.02.0030	13433	6212	3518	4182	2483	464	246	199	751	70	45	140	42	221	165	145	823	908	1131	397	117
Tb11.02.4180	2661	344	377	84	96	1049	476	222	274	338	275	178	42	219	249	60	41	263	849	81	69
Tb927.10.15830	801	172	98	27	22	657	251	357	354	189	111	199	42	107	137	33	17	220	496	102	77
Tb927.10.4370	1353	92	70	32	33	282	188	193	221	170	126	121	42	36	23	15	12	57	118	31	11
Tb927.10.8140	486	138	63	10	6	981	247	229	210	217	151	120	42	96	99	15	12	135	657	93	49
Tb927.5.1710	773	428	324	224	171	818	313	732	876	244	138	105	42	250	283	185	182	250	604	234	106
Tb927.5.2060	2223	600	431	106	85	615	531	323	441	183	173	123	42	153	112	50	47	342	330	75	52
Tb927.5.2190	1356	748	659	132	113	968	454	267	465	360	216	189	42	592	646	198	163	954	2185	493	282
Tb927.6.1140	2025	412	441	64	73	1053	486	447	634	312	208	181	42	293	265	65	37	573	1191	200	89
Tb927.7.1840	897	379	412	51	52	1567	589	152	105	465	394	197	42	558	522	56	37	827	2114	108	113
Tb927.8.4000	3888	877	914	202	202	1884	802	830	1020	436	344	246	42	239	219	65	52	499	1197	162	106
Tb927.8.810	1228	423	349	106	107	821	398	425	531	297	268	185	42	261	256	95	88	326	737	159	82
Tb09.160.0860	3169	395	223	91	69	444	325	295	381	128	96	116	41	180	155	39	44	260	529	115	66
Tb09.211.2620	588	127	120	22	25	415	161	46	52	212	158	134	41	294	310	112	60	194	743	83	81
Tb11.01.0120	1446	198	216	159	142	522	234	439	588	104	77	303	41	127	130	111	94	128	430	154	113
Tb11.01.0290	1387	318	265	72	77	1130	493	844	1084	307	226	165	41	184	125	67	86	486	674	267	164
Tb11.01.2540	2696	509	462	126	155	881	334	262	415	252	164	179	41	307	292	167	177	392	1106	256	112
Tb11.01.5530	1952	213	175	46	67	799	276	351	546	214	185	127	41	132	154	24	23	169	864	144	64
Tb927.1.3390	775	50	29	16	15	175	65	160	174	156	102	91	41	61	91	41	28	72	316	130	81
Tb927.10.1470	633	743	830	460	455	505	236	211	519	143	113	159	41	171	239	169	153	281	897	366	211
Tb927.10.2620	579	227	243	83	85	616	248	279	358	249	183	189	41	328	373	246	152	313	1153	482	217
Tb927.10.6050	5112	2653	1091	3553	1108	470	474	222	1224	42	38	98	41	430	361	548	4228	1426	1075	747	234
Tb927.10.9250	810	352	280	244	185	449	287	419	475	192	192	66	41	132	95	79	114	235	293	168	80
Tb927.2.4780	3755	461	368	172	133	924	348	1002	1178	160	130	441	41	258	278	180	105	318	1000	288	208
Tb927.3.5180	532	926	725	1147	689	2220	688	1432	3247	98	59	77	41	166	215	392	354	234	634	350	261
Tb927.4.1740	1516	453	296	140	103	502	317	223	229	299	187	148	41	360	403	170	153	397	947	188	113
Tb927.4.2200	5016	411	247	115	118	158	183	108	150	38	36	139	41	99	95	48	91	247	321	92	69
Tb927.5.4500	662	254	418	112	150	1099	388	700	879	254	155	346	41	380	433	317	220	375	2358	776	542
Tb927.6.2790	1121	1407	1365	1134	929	1358	453	746	2024	127	86	110	41	225	287	334	326	454	1200	621	344
Tb927.7.3220	2114	390	218	61	48	666	310	376	521	242	186	210	41	284	236	94	85	348	888	289	161
Tb927.7.4170	1038	610	803	908	867	1835	641	1794	2956	235	124	127	41	524	626	743	623	325	1156	508	263
Tb927.7.920	13087	3639	2842	1938	1523	394	204	201	478	60	43	132	41	239	198	168	502	540	889	285	122
Tb927.8.2720	1269	269	274	46	50	657	268	185	218	232	157	158	41	279	229	50	29	349	1138	152	96
Tb927.8.6750	555	477	484	380	281	352	183	212	784	98	62	92	41	81	138	104	105	180	542	277	104
Tb927.8.7440	2024	322	225	136	122	903	394	630	811	219	162	187	41	260	312	216	197	521	1131	430	236
Tb09.211.0500	1510	835	547	275	156	1427	784	679	980	324	227	98	40	245	241	147	178	459	633	152	96
Tb09.211.0600	1319	391	479	101	124	1318	510	508	769	265	169	259	40	493	501	298	174	498	1334	527	340
Tb11.01.3420	1811	931	418	524	259	302	187	180	461	67	45	46	40	254	222	199	256	275	404	173	99
Tb11.01.4701	2690	957	781	311	284	1369	550	301	643	309	186	223	40	500	479	198	170	656	1847	436	230
Tb11.02.1600	1972	730	621	109	90	1063	653	295	259	383	378	209	40	405	322	124	172	554	751	123	68
Tb927.1.860	938	561	435	344	263	668	328	494	999	96	66	117	40	213	221	202	204	276	488	351	176
Tb927.10.13110	357	217	259	156	193	822	273	972	961	166	137	142	40	107	160	131	96	146	684	312	150
Tb927.10.14700	1029	435	231	339	185	351	202	240	393	113	92	115	40	396	332	197	187	285	670	340	160
Tb927.10.7900	1158	271	132	34	42	666	335	185	202	185	110	83	40	98	86	19	22	249	361	49	46
Tb927.10.7980	1326	208	158	26	27	363	186	48	40	201	154	68	40	129	147	19	17	280	547	60	48
Tb927.10.9870	798	373	345	71	69	734	312	173	220	237	193	121	40	308	411	323	209	370	1351	408	244
Tb927.2.1920	2246	567	622	179	257	1378	481	860	1302	291	149	315	40	657	758	488	320	609	2258	791	396
Tb927.3.3580	2733	995	430	608	250	869	669	554	1456	182	130	89	40	311	227	195	585	743	927	395	161
Tb927.5.2900	2701	344	368	70	115	709	286	353	394	181	138	156	40	134	119	62	46	228	495	158	82
Tb927.6.3940	1141	300	309	124	76	771	320	612	787	349	201	138	40	246	235	171	152	275	608	267	119
Tb927.7.5830	447	164	211	76	65	386	142	187	220	133	97	166	40	122	144	95	52	141	536	212	112
Tb927.8.1530	1551	276	261	50	34	1158	570	486	387	453	406	154	40	203	179	31	43	488	615	95	61
Tb927.8.1620	1764	1979	2098	377	380	906	422	135	262	433	335	220	40	348	249	89	130	540	577	119	59
Tb927.8.2200	867	355	228	169	124	706	277	535	766	133	95	153	40	199	196	218	193	160	573	312	133
Tb927.8.2530	1298	102	69	53	36	299	175	198	261	129	86	92	40	67	94	73	64	113	313	169	108
Tb927.8.3720	1415	480	141	191	91	504	292	235	236	216	149	112	40	347	318	221	185	311	994	333	159
Tb927.8.5070	800	190	148	128	73	815	299	827	1036	218	168	143	40	215	196	134	95	218	617	251	120
Tb09.160.0670	10729	1449	775	414	369	580	392	278	426	139	143	199	39	285	193	97	284	730	1020	166	114
Tb09.211.0740	664	374	408	163	178	660	306	276	737	159	85	190	39	270	400	262	165	223	1034	451	226
Tb11.01.2810	5266	696	409	197	173	115	93	57	150	45	39	103	39	61	51	32	68	243	182	65	42
Tb11.02.1580	1233	191	151	16	22	103	46	29	88	80	57	165	39	78	66	14	18	66	277	40	14
Tb11.02.3610	1505	1017	958	604	542	1669	632	864	2676	177	108	104	39	210	161	93	126	494	784	306	139
Tb927.1.4160	835	165	155	60	61	692	327	430	400	223	256	145	39	137	110	28	27	190	381	104	58
Tb927.10.10730	4530	395	231	129	126	263	268	232	262	77	70	133	39	80	49	39	77	188	179	66	51
Tb927.10.11680	2826	637	650	94	136	793	573	300	339	219	180	125	39	224	146	78	88	541	558	120	72
Tb927.10.1230	1029	406	377	180	129	565	262	296	711	143	96	194	39	225	186	163	137	316	700	233	102
Tb927.10.12710	2436	1917	967	1995	901	333	297	153	400	109	75	86	39	257	236	204	1060	481	639	372	140
Tb927.10.12840	915	451	423	523	342	768	292	910	1152	186	113	101	39	183	203	199	204	337	661	341	158
Tb927.10.14650	375	166	241	38	49	933	374	291	297	392	325	155	39	272	288	54	42	336	1266	205	167
Tb927.10.15820	813	147	85	16	10	789	240	142	142	164	125	160	39	150	127	11	5	235	435	33	22
Tb927.10.6390	897	289	412	128	163	1405	499	688	947	166	116	184	39	197	200	110	93	330	1289	371	189
Tb927.10.8060	1374	449	442	48	38	1936	737	371	316	679	595	144	39	611	691	86	41	805	2096	159	105
Tb927.2.1720	1763	361	386	82	87	915	384	395	466	343	279	104	39	225	200	53	37	305	692	92	37
Tb927.2.3160	3232	314	256	151	124	507	198	391	547	175	138	160	39	137	140	87	65	165	495	142	96
Tb927.4.1020	1652	465	401	159	150	1011	611	759	861	297	285	110	39	236	207	96	113	447	729	239	116
Tb927.4.2530	802	742	288	1050	298	1086	703	1111	1728	77	50	37	39	143	169	296	427	268	546	232	197
Tb927.5.810	1412	2564	2071	3648	2373	2633	1401	2832	8362	104	54	33	39	370	342	702	1656	618	694	406	246
Tb927.5.970	574	235	301	51	60	699	375	309	333	208	133	150	39	327	445	275	182	318	1598	426	257
Tb927.6.4790	527	114	106	43	35	783	261	537	582	221	162	211	39	103	120	22	16	153	609	114	70
Tb927.7.6400	515	285	334	113	120	1067	342	603	623	351	246	424	39	214	309	106	42	258	1706	405	193
Tb927.8.3500	2984	599	767	147	197	550	265	213	339	126	78	170	39	219	163	71	53	281	594	155	73
Tb927.8.4150	1255	405	421	128	107	949	408	688	700	213	223	182	39	193	186	87	57	285	872	325	120
Tb927.8.5320	405	135	138	60	51	858	309	869	1051	261	161	338	39	154	190	70	55	202	849	249	199
Tb09.160.5070	826	236	174	116	98	463	170	337	551	155	79	138	38	178	145	84	86	209	462	175	87
Tb09.211.1330	1559	328	336	97	67	1220	482	396	336	262	241	175	38	422	416	183	102	387	1319	266	140
Tb09.211.2600	1816	299	375	51	89	1035	414	331	269	274	227	144	38	225	235	59	33	321	1301	187	102
Tb09.244.2690	369	51	72	18	20	92	37	233	213	132	110	128	38	43	70	37	24	51	196	93	33
Tb11.01.1170	3694	662	378	275	160	557	250	155	184	204	201	129	38	143	171	71	238	267	696	140	64
Tb11.01.6260	4227	381	200	214	149	262	163	251	440	77	47	269	38	63	50	54	75	141	136	110	83
Tb11.01.8720	3617	252	133	67	68	330	167	308	284	196	143	187	38	190	155	55	54	214	663	216	126
Tb11.03.0460	3960	877	758	149	163	430	345	202	341	103	90	214	38	208	147	53	56	467	506	121	56
Tb11.39.0006	1945	492	566	65	71	1715	781	354	316	421	354	126	38	643	476	134	128	749	1188	91	65
Tb11.52.0001	2406	534	331	63	50	878	362	136	163	249	147	156	38	273	214	27	32	472	836	58	44
Tb927.10.1390	705	693	855	679	707	261	151	206	514	90	71	181	38	74	66	31	24	68	253	89	50
Tb927.10.3710	696	648	535	192	152	638	232	371	958	136	93	181	38	328	413	283	188	505	1407	853	440
Tb927.10.4180	744	897	923	819	738	1062	485	634	1463	126	83	145	38	313	507	531	711	456	1384	582	241
Tb927.10.4710	621	361	359	256	176	456	186	261	582	112	87	101	38	184	219	256	190	276	495	258	122
Tb927.10.6080	933	627	642	187	165	558	279	183	427	281	196	116	38	469	449	249	190	447	1314	311	186
Tb927.10.9510	603	139	186	20	20	693	227	76	74	296	183	151	38	288	315	118	61	221	1165	185	96
Tb927.10.9650	4221	1359	956	338	272	535	410	230	507	141	103	163	38	298	168	104	243	815	703	200	90
Tb927.5.1090	2690	1066	502	721	334	1066	709	579	1197	124	117	121	38	208	131	107	239	546	446	260	142
Tb927.5.2960	1358	779	644	657	380	685	221	357	1138	183	75	259	38	486	524	392	261	530	1336	631	279
Tb927.5.3670	3733	801	379	209	161	691	553	272	419	186	130	90	38	188	114	41	72	644	480	137	87
Tb927.5.4440	417	165	148	102	109	192	139	221	375	167	68	360	38	278	394	132	85	205	1271	415	245
Tb927.5.4560	1730	510	272	153	71	627	326	209	324	168	114	99	38	99	103	24	20	264	374	106	63
Tb927.5.960	2088	323	304	59	67	735	347	170	233	189	149	115	38	184	208	42	33	278	778	142	93
Tb927.6.1830	1424	396	179	122	57	796	343	368	662	246	149	135	38	314	333	133	101	436	987	251	116
Tb927.7.6450	3572	372	314	109	111	701	364	492	483	172	147	149	38	148	110	40	41	243	358	89	37
Tb927.8.6230	1103	365	287	61	38	997	359	290	385	360	244	153	38	278	312	71	45	374	889	162	100
Tb927.8.8120	1299	191	104	49	44	313	183	287	475	117	69	115	38	80	76	38	34	128	213	98	45
Tb09.211.2420	7956	1813	1558	434	399	404	198	237	433	106	110	225	37	192	151	87	139	392	595	161	92
Tb11.01.1310	1405	495	515	123	134	1238	543	561	732	404	306	155	37	318	351	93	71	503	1045	258	124
Tb11.01.7240	2442	217	202	45	41	448	220	233	239	172	156	130	37	88	101	54	36	190	431	82	55
Tb11.01.8030	3537	1142	598	310	176	472	379	174	306	147	170	104	37	166	92	39	125	401	292	88	53
Tb11.02.1135	487	341	166	184	115	348	176	275	325	259	187	164	37	218	298	147	111	249	939	298	139
Tb11.02.2960	964	226	248	90	127	1071	300	860	700	316	270	245	37	145	151	99	57	330	945	383	192
Tb11.02.4390	2168	281	295	53	44	1007	532	151	188	423	346	149	37	256	218	22	17	408	808	59	19
Tb11.02.4990	1087	456	338	61	59	808	362	213	226	235	238	117	37	316	199	111	129	437	642	165	82
Tb11.02.5200	2963	854	794	402	413	1315	550	584	888	302	246	222	37	404	396	226	291	721	1793	524	237
Tb11.02.5460	1337	372	169	96	38	494	255	186	315	310	172	160	37	335	399	105	72	424	1310	277	190
Tb11.46.0008	2511	1241	1192	615	528	654	311	212	901	90	76	113	37	192	238	124	127	277	630	259	104
Tb927.10.1750	747	137	101	37	24	410	243	249	226	240	176	133	37	138	112	18	21	195	281	48	37
Tb927.10.5850	14232	1695	1391	702	602	298	163	239	427	37	39	106	37	138	98	90	257	505	528	161	91
Tb927.10.6950	1080	601	641	129	131	761	399	306	368	409	280	191	37	315	211	82	72	487	687	171	105
Tb927.10.8020	2097	1381	1228	388	372	1702	800	777	945	432	338	130	37	304	225	167	209	1009	1477	487	199
Tb927.4.1320	2900	317	179	82	56	144	140	51	108	42	21	94	37	35	42	18	22	105	101	31	22
Tb927.4.1570	1086	221	237	29	28	670	301	76	76	274	191	109	37	180	155	9	11	250	651	31	23
Tb927.4.310	19842	2933	1729	1271	1099	489	257	264	635	59	50	169	37	164	156	96	278	591	937	219	145
Tb927.4.3310	3000	429	291	90	146	746	330	453	624	181	119	124	37	241	252	90	85	336	856	98	60
Tb927.6.1460	2305	611	727	206	230	993	405	613	946	205	161	148	37	369	406	296	215	401	1325	302	180
Tb927.6.2990	1040	255	206	32	35	930	328	288	327	451	294	138	37	125	133	9	9	218	644	51	35
Tb927.6.730	3377	487	464	100	105	665	293	81	174	134	94	157	37	171	156	32	23	285	569	73	47
Tb927.7.4260	868	701	893	480	569	1233	482	757	1358	224	141	109	37	655	836	841	622	465	2068	803	367
Tb927.7.5120	1182	321	217	39	29	646	363	256	204	302	244	98	37	242	167	31	23	353	546	61	52
Tb927.8.2540	1507	252	171	167	106	394	192	193	499	144	117	132	37	203	181	81	78	259	509	152	103
Tb927.8.3250	14426	3591	1538	2784	1339	373	225	146	381	65	32	92	37	206	184	165	747	703	827	311	128
Tb927.8.4900	4931	733	1137	141	293	1037	327	506	627	135	177	191	37	186	165	111	71	271	1058	243	119
Tb927.8.4920	2358	372	238	74	56	674	222	251	303	182	152	190	37	199	178	49	36	293	614	109	46
Tb09.160.0450	1446	742	894	252	221	726	273	310	670	189	107	179	36	697	654	461	330	685	1534	565	294
Tb09.211.0870	1701	375	287	49	53	565	219	71	89	157	98	126	36	205	156	21	21	233	613	44	33
Tb09.v1.0650	1686	1091	503	466	252	619	312	190	487	155	130	125	36	629	678	802	738	539	1410	521	230
Tb11.01.0270	1481	199	156	44	44	419	177	254	328	162	97	197	36	157	138	29	20	230	585	93	74
Tb11.01.1090	805	137	127	20	25	390	185	155	120	142	98	124	36	96	73	17	9	137	299	44	24
Tb11.01.1625	382	1054	1691	1541	1815	1781	1054	1879	3019	70	43	111	36	253	344	521	616	245	1250	558	360
Tb11.02.0460	2501	622	512	75	70	1066	505	165	186	309	267	144	36	548	371	74	55	864	1194	74	51
Tb11.02.0530	1326	803	574	643	312	487	196	267	466	134	94	165	36	268	244	88	74	177	341	87	56
Tb927.1.3560	3400	520	584	201	315	935	358	1343	1528	124	137	133	36	100	105	98	119	143	626	238	133
Tb927.10.15590	591	156	110	73	36	590	262	524	601	118	111	122	36	119	118	73	53	141	363	172	100
Tb927.10.4800	1765	217	198	33	40	385	183	88	144	172	151	164	36	239	185	23	29	237	477	43	21
Tb927.2.4090	813	353	291	103	85	438	198	156	320	73	90	73	36	80	118	112	71	135	348	184	82
Tb927.3.3750	1330	447	349	376	346	875	399	944	1559	128	114	57	36	137	169	256	456	189	523	229	163
Tb927.4.1270	1433	927	715	582	437	317	110	114	603	115	59	104	36	282	265	195	192	251	677	287	114
Tb927.5.4390	457	198	136	84	66	144	98	109	268	106	55	70	36	94	128	65	64	121	306	187	99
Tb927.6.1470	856	464	267	372	193	363	224	543	878	71	56	74	36	98	83	117	100	144	187	116	75
Tb927.6.2560	1061	242	370	69	97	1485	527	779	684	334	227	107	36	133	143	63	43	212	680	252	99
Tb927.7.6640	4971	540	261	268	169	254	331	193	269	58	70	69	36	107	72	53	206	128	123	31	20
Tb927.7.6900	1877	821	421	568	239	551	451	471	804	180	157	74	36	330	181	196	340	545	472	293	171
Tb927.8.1830	1807	393	336	109	95	389	230	164	284	152	112	143	36	159	94	62	58	396	419	116	74
Tb09.160.0470	2230	498	470	120	151	765	303	177	402	220	178	126	35	159	138	30	14	274	625	125	53
Tb09.160.0840	1994	220	105	52	39	607	264	305	261	217	172	128	35	184	169	66	50	273	710	125	82
Tb09.160.1040	417	97	156	5	26	523	234	129	102	245	253	163	35	228	358	217	153	163	930	252	84
Tb09.160.1560	8500	1030	694	335	248	238	156	92	196	78	63	89	35	226	136	75	168	372	347	122	66
Tb09.160.4860	1907	176	165	48	40	158	62	47	67	59	59	127	35	88	78	14	20	197	319	30	18
Tb09.211.0580	6975	843	420	447	255	189	143	154	392	34	27	144	35	124	78	83	145	244	253	127	79
Tb09.211.4920	1194	491	717	319	426	2062	795	1983	2305	149	106	215	35	272	424	387	390	262	1721	575	297
Tb09.244.2600	9147	1183	957	757	600	326	221	262	439	72	87	150	35	183	120	89	219	398	357	166	94
Tb11.01.3560	1520	1020	758	945	514	843	587	640	1172	93	63	96	35	333	281	378	589	474	668	365	227
Tb11.01.6510	1722	1446	702	1165	531	242	123	118	760	123	54	71	35	263	234	263	337	319	632	296	132
Tb11.01.7160	2310	404	358	76	61	995	459	321	424	234	182	112	35	104	86	38	18	380	588	111	55
Tb11.02.2030	419	304	297	351	323	2107	716	2416	2531	178	143	184	35	160	243	271	230	143	922	393	181
Tb11.02.2250	4607	728	449	112	102	1490	804	261	299	492	548	170	35	289	270	48	35	732	969	81	44
Tb11.02.4100	1646	1818	599	2142	607	1232	657	608	2274	84	43	119	35	381	393	468	790	565	1112	402	198
Tb11.02.4530	2248	339	249	72	74	786	374	245	232	225	189	188	35	201	193	35	22	370	760	105	68
Tb11.02.5550	2855	1184	910	873	516	1024	625	577	1425	180	165	126	35	249	192	179	300	550	675	236	116
Tb927.10.10610	755	330	395	345	301	728	302	619	717	100	85	155	35	204	205	130	82	249	508	266	151
Tb927.10.2760	2169	672	728	94	119	819	290	201	551	248	139	117	35	279	265	72	65	517	1102	215	107
Tb927.10.290	696	388	342	122	99	532	181	145	436	201	108	171	35	378	461	267	181	346	1063	362	193
Tb927.10.8120	2613	707	612	114	134	735	299	144	340	178	129	105	35	220	143	41	35	459	627	100	36
Tb927.10.940	627	139	101	32	21	164	94	49	62	93	57	101	35	83	56	23	16	159	298	52	17
Tb927.2.4850	932	814	643	500	363	498	241	306	847	199	133	120	35	401	385	340	338	428	848	463	217
Tb927.3.4120	2057	336	326	51	56	785	501	156	169	267	250	124	35	169	129	23	20	350	429	42	33
Tb927.3.4470	1609	317	278	109	75	790	251	199	249	250	173	104	35	139	124	43	38	224	478	101	46
Tb927.4.3930	1709	902	723	275	300	757	291	288	523	187	100	122	35	287	305	187	160	292	851	292	162
Tb927.5.3710	1743	800	668	344	238	841	319	378	1169	176	108	121	35	203	224	119	104	281	827	305	126
Tb927.7.1330	1168	227	213	52	59	347	134	102	248	114	93	137	35	148	166	39	23	163	657	232	91
Tb927.7.4880	760	166	106	62	49	728	233	549	696	128	81	221	35	149	135	25	24	145	433	134	73
Tb927.7.710	1956	3298	2508	3417	2264	432	163	203	2205	90	48	100	35	578	503	711	1118	586	1075	647	279
Tb927.8.6510	701	123	91	21	21	209	97	40	40	97	68	101	35	99	85	10	14	96	402	30	9
Tb927.8.7000	647	132	130	26	26	520	254	364	383	225	131	169	35	132	143	29	17	197	785	151	107
Tb927.8.980	3665	834	553	312	283	838	425	948	1800	181	112	149	35	156	146	167	182	514	825	474	262
Tb09.211.0530	798	199	132	43	36	238	115	98	169	235	116	68	34	234	237	43	50	256	897	152	51
Tb11.02.0250	2519	1026	785	712	437	843	641	445	962	196	127	71	34	316	255	311	509	511	679	308	128
Tb11.02.0580	747	270	242	268	171	809	237	411	553	134	124	144	34	220	243	165	90	169	404	175	96
Tb11.02.4210	3891	821	357	166	126	357	532	192	285	106	100	99	34	164	109	22	84	459	368	68	63
Tb11.03.0475	321	205	115	111	45	375	146	328	375	229	140	214	34	247	240	115	43	184	608	234	196
Tb11.12.0013	957	291	335	40	39	591	262	85	106	127	126	92	34	175	209	83	52	231	631	69	38
Tb927.1.1050	3892	750	783	137	178	1481	542	359	452	342	243	191	34	303	204	61	42	661	1096	132	70
Tb927.10.10200	1410	233	86	49	43	490	209	135	182	107	84	137	34	111	111	48	33	203	401	73	46
Tb927.10.6170	4527	427	295	99	98	432	385	164	213	135	118	114	34	131	92	36	53	307	359	56	42
Tb927.10.750	381	210	186	76	102	617	278	486	753	168	106	59	34	149	165	151	166	168	1209	423	144
Tb927.2.2570	1930	152	166	26	40	521	243	350	446	175	144	136	34	137	130	25	12	155	541	65	33
Tb927.3.2330	3090	457	489	42	84	741	282	107	180	182	146	164	34	253	232	44	36	306	1050	84	44
Tb927.3.2600	6728	2630	856	2740	963	303	234	172	413	94	77	138	34	277	185	124	808	583	644	192	103
Tb927.3.3560	2023	338	149	244	138	221	178	71	187	37	31	55	34	250	227	278	700	373	515	239	109
Tb927.3.4520	855	182	218	18	31	901	310	311	282	257	191	113	34	130	118	18	12	197	589	88	52
Tb927.4.3490	492	284	233	87	57	907	455	258	246	280	263	103	34	299	393	118	88	343	1310	171	61
Tb927.4.3840	2417	501	403	113	118	343	131	457	588	103	51	122	34	121	133	45	44	109	527	122	60
Tb927.5.3750	2691	560	577	148	147	1234	454	467	518	341	173	164	34	387	398	99	70	391	1562	225	126
Tb927.7.2400	1336	712	806	179	193	1035	322	218	560	205	150	222	34	293	336	163	112	412	1297	420	199
Tb927.7.4500	1743	967	633	659	379	771	585	537	853	166	128	65	34	450	400	613	1158	830	711	357	223
Tb927.7.5270	585	143	127	16	17	407	186	145	121	212	187	98	34	69	72	13	18	163	296	53	23
Tb927.7.7040	1004	1007	535	682	291	924	357	649	2058	231	113	148	34	239	273	225	179	642	1380	692	366
Tb927.8.1230	784	258	223	81	74	532	200	295	363	179	106	189	34	215	287	181	91	205	887	323	187
Tb927.8.1800	1749	261	289	50	45	528	252	104	106	172	106	103	34	258	217	32	31	328	519	51	36
Tb927.8.1810	998	224	244	20	22	925	385	284	232	303	274	125	34	134	95	15	8	305	465	63	46
Tb927.8.6080	1911	236	230	32	49	413	175	328	376	97	90	160	34	119	151	98	72	136	474	145	71
Tb927.8.6550	822	163	77	33	20	280	102	141	223	69	62	138	34	65	62	26	13	78	203	72	39
Tb11.01.6790	1827	256	94	136	50	267	162	89	232	95	53	63	33	97	95	69	106	272	358	164	66
Tb11.01.6860	1076	432	269	68	74	732	291	176	285	268	196	143	33	332	410	220	116	427	1492	463	280
Tb11.01.7510	3856	1016	828	180	175	1849	699	449	493	314	210	185	33	415	430	127	132	571	1866	195	132
Tb11.01.7790	1978	260	228	53	72	218	124	82	108	95	79	149	33	116	77	34	30	157	270	54	35
Tb11.01.8430	2946	641	527	72	89	1001	689	268	231	347	372	121	33	228	161	28	53	637	601	100	76
Tb11.02.1620	1941	199	150	36	47	477	270	101	122	211	205	164	33	40	39	12	13	142	169	37	17
Tb11.02.5170	722	316	222	147	52	543	239	202	372	243	129	222	33	367	460	276	180	366	1169	468	247
Tb11.03.0450	4823	1430	1218	229	216	370	178	139	338	81	50	133	33	317	181	75	117	466	681	99	70
Tb11.57.0005	2278	671	781	353	485	1238	596	1360	2021	147	125	45	33	100	166	157	200	108	606	177	83
Tb927.1.3040	813	143	122	29	24	369	211	94	162	187	136	155	33	112	99	18	22	211	324	50	32
Tb927.10.13630	2424	1275	933	828	505	903	512	438	1465	131	79	139	33	276	203	131	231	559	901	337	122
Tb927.10.1990	2592	1357	609	265	148	722	568	296	390	191	231	143	33	438	241	135	299	1128	789	145	109
Tb927.10.210	1386	312	290	31	32	645	303	95	123	286	205	76	33	366	456	183	103	383	825	288	153
Tb927.10.4500	958	294	392	52	71	1029	412	332	279	376	264	128	33	152	182	18	15	267	1238	100	60
Tb927.10.8630	789	236	323	56	70	468	276	312	271	143	116	70	33	145	160	54	82	317	879	400	182
Tb927.2.5800	1142	291	185	58	37	596	252	345	435	213	155	121	33	279	250	175	93	322	811	341	202
Tb927.4.1630	2211	788	887	134	182	423	224	99	206	182	98	167	33	295	260	71	77	524	745	127	57
Tb927.4.950	975	205	151	40	25	563	267	260	245	177	167	83	33	103	82	18	14	208	290	38	27
Tb927.6.1940	2658	480	428	76	93	1013	495	377	379	288	255	120	33	207	152	40	67	363	699	83	50
Tb927.6.2370	4214	550	595	69	124	818	306	173	279	186	144	139	33	286	227	47	47	427	882	89	60
Tb927.6.400	2445	812	719	343	308	1045	412	481	1011	246	149	157	33	522	432	361	331	553	1254	471	200
Tb927.6.4250	737	339	392	43	78	947	312	287	344	273	192	234	33	658	589	511	277	521	1950	875	634
Tb927.7.6380	655	114	70	12	14	472	243	243	190	207	122	114	33	104	86	16	13	179	364	45	39
Tb927.8.1600	2310	1113	225	548	159	315	154	96	470	111	70	111	33	255	326	187	224	313	948	341	206
Tb927.8.1730	453	95	60	29	21	213	114	113	147	90	76	96	33	75	80	30	23	101	261	50	30
Tb927.8.2650	1191	542	379	190	151	991	341	374	540	397	253	238	33	193	198	54	37	254	815	131	73
Tb927.8.7290	1721	113	41	44	46	119	62	110	165	35	28	117	33	32	20	23	20	38	44	34	21
Tb09.211.1600	948	323	310	95	59	713	379	623	749	211	182	153	32	59	41	6	6	176	306	85	28
Tb09.211.1610	1196	162	183	24	23	684	238	85	70	211	157	97	32	86	71	5	9	127	300	25	15
Tb09.211.1820	6741	1766	1451	575	455	313	203	172	388	68	38	99	32	120	124	69	137	349	534	164	82
Tb11.01.1140	1863	260	198	54	50	684	313	87	117	198	158	122	32	174	135	39	27	375	506	41	41
Tb11.01.5365	1316	187	268	45	83	684	241	408	270	206	173	107	32	227	230	93	76	240	853	164	99
Tb11.01.6470	1277	524	431	469	406	1283	723	1270	2486	96	66	35	32	103	142	133	194	91	303	120	43
Tb11.02.4870	889	773	715	466	313	735	347	474	1160	115	102	99	32	332	421	377	328	337	1064	538	266
Tb927.1.3840	1971	306	138	40	40	442	222	64	93	116	73	93	32	187	146	34	22	254	633	61	42
Tb927.10.1430	738	360	342	192	162	737	288	310	543	140	91	171	32	385	384	354	209	356	1012	355	165
Tb927.10.2680	1728	522	537	95	93	963	397	225	456	202	125	120	32	243	180	51	29	482	643	110	74
Tb927.10.3210	1686	1401	1129	1430	934	1581	1021	977	1693	138	117	123	32	399	424	656	997	942	1207	598	283
Tb927.10.4310	888	460	467	80	66	884	358	318	440	247	139	104	32	273	274	161	108	381	786	257	157
Tb927.10.8650	1014	381	376	78	71	1200	487	366	456	358	279	150	32	432	488	201	151	439	1351	383	188
Tb927.2.5060	1229	927	1430	853	1163	1235	510	920	2281	142	107	156	32	290	339	243	230	154	687	238	122
Tb927.3.2140	2847	1058	695	453	306	514	401	366	658	167	131	106	32	202	152	91	161	496	582	230	104
Tb927.3.2910	424	106	84	41	37	191	77	117	142	134	114	95	32	92	115	38	41	109	471	161	63
Tb927.3.4740	1323	299	177	45	42	640	405	133	140	359	416	113	32	226	187	39	27	436	538	54	34
Tb927.4.1960	1125	214	51	49	36	316	201	148	166	188	94	62	32	118	131	39	19	219	317	72	54
Tb927.4.3780	1244	103	75	47	54	453	174	621	728	191	145	208	32	79	119	94	57	94	524	168	39
Tb927.4.4350	899	351	350	186	184	407	219	359	382	156	135	74	32	158	195	166	133	161	524	244	112
Tb927.5.1450	4543	802	317	380	265	451	176	287	766	133	104	251	32	234	189	138	99	263	509	207	111
Tb927.5.3540	4469	776	823	125	158	985	334	248	349	163	87	174	32	260	216	71	44	327	853	128	74
Tb927.5.3950	1072	277	194	141	103	483	240	395	564	166	107	114	32	105	76	41	53	140	388	112	49
Tb927.7.2510	1087	519	429	329	263	881	394	684	1080	174	120	72	32	138	177	167	205	130	535	198	89
Tb927.7.4460	2871	743	502	136	126	814	446	169	268	193	159	133	32	291	211	84	119	601	713	130	80
Tb927.7.6440	737	251	265	99	143	492	271	307	331	129	101	61	32	273	282	350	250	204	684	355	177
Tb927.8.1840	6321	1034	438	410	193	299	294	134	280	95	79	82	32	262	199	119	565	615	560	150	117
Tb927.8.1900	1234	200	208	52	55	351	186	115	168	158	112	92	32	142	128	69	37	169	408	87	40
Tb927.8.2750	2037	255	77	79	40	312	169	131	200	108	84	131	32	166	182	64	25	308	733	154	109
Tb927.8.6020	1156	185	157	18	36	467	222	75	76	232	171	95	32	126	124	21	10	196	493	45	29
Tb927.8.6390	1043	669	337	464	323	623	288	576	1596	66	34	173	32	90	123	117	123	327	1421	763	423
Tb927.8.7020	3230	1186	524	337	167	927	509	288	553	242	172	119	32	492	351	137	202	953	1140	228	158
Tb927.8.7550	2309	117	40	46	51	139	63	200	196	100	74	136	32	48	50	24	28	41	210	58	43
Tb927.8.7950	5782	995	639	419	285	235	147	142	239	68	75	108	32	106	86	54	252	235	361	100	55
Tb09.160.4460	1947	2895	3923	383	802	2370	843	582	815	202	182	157	31	395	476	249	267	483	2282	264	164
Tb09.211.0050	511	909	797	877	840	2025	686	2452	5272	126	81	208	31	251	315	293	212	274	1371	565	355
Tb09.211.0400	2131	609	432	82	93	655	294	142	373	173	118	95	31	269	274	78	60	492	1071	175	92
Tb09.211.3060	462	79	168	65	123	928	280	584	903	138	149	86	31	55	69	61	53	75	391	159	68
Tb09.211.4780	2386	817	792	227	190	1089	663	342	455	296	281	141	31	392	233	159	199	779	860	163	103
Tb11.01.4320	2109	448	412	89	79	628	414	146	178	221	205	106	31	181	118	51	53	411	436	50	26
Tb11.01.5090	2140	769	402	466	260	764	422	438	1068	171	103	101	31	242	249	160	162	348	878	211	96
Tb11.01.7120	673	231	126	127	80	296	111	333	700	109	58	168	31	176	203	78	71	231	1029	466	199
Tb11.02.1120	1960	1752	1051	1476	837	1208	1042	887	1427	48	34	115	31	262	286	305	871	353	568	238	81
Tb11.02.2090	5416	604	310	228	162	102	103	66	136	28	33	109	31	119	59	48	112	223	244	72	49
Tb11.02.4410	2286	357	254	60	76	579	269	306	353	214	207	158	31	193	166	82	55	245	464	103	69
Tb11.03.0210	3672	621	661	103	114	389	204	100	183	113	106	86	31	272	125	50	52	523	522	60	38
Tb11.03.0230	1389	482	466	204	193	919	446	652	1391	176	140	84	31	313	274	398	507	1260	2429	1139	340
Tb11.12.0007	2103	353	357	36	51	1272	541	188	169	516	372	155	31	179	181	21	11	308	719	46	38
Tb11.47.0001	1422	425	324	205	158	693	317	414	383	280	186	78	31	196	187	117	155	184	364	151	64
Tb11.50.0001	856	627	705	623	732	506	225	335	1587	74	46	143	31	254	313	500	505	349	1199	602	315
Tb927.1.3910	2724	537	342	87	64	492	305	104	117	181	126	83	31	268	190	56	82	534	653	74	55
Tb927.10.1170	5244	2718	1541	2405	1406	183	145	133	398	33	28	96	31	222	184	184	1257	574	667	312	105
Tb927.10.12820	3042	2413	1548	2132	980	621	444	233	1230	59	37	82	31	237	177	210	551	538	568	273	142
Tb927.10.14780	855	552	370	321	166	649	380	446	873	185	148	103	31	200	177	164	211	316	523	263	141
Tb927.10.3660	1212	921	566	937	498	894	466	748	2064	68	69	65	31	181	200	257	373	500	895	380	205
Tb927.10.6010	3495	1218	1144	586	415	871	492	287	852	166	108	114	31	363	247	193	266	659	906	256	116
Tb927.10.6020	537	225	169	31	29	590	240	139	115	307	213	122	31	127	184	45	43	228	613	144	59
Tb927.10.6150	9726	1506	718	482	375	489	319	129	249	91	81	69	31	271	153	80	216	766	818	159	108
Tb927.10.7380	1050	235	200	27	33	861	319	100	104	275	208	116	31	221	194	34	16	359	697	40	45
Tb927.10.7940	1113	173	137	53	30	393	236	93	91	214	153	80	31	102	90	12	15	178	328	52	17
Tb927.10.8610	2658	370	269	66	71	688	471	129	174	205	184	80	31	168	119	28	34	353	426	50	36
Tb927.3.4190	1998	710	414	335	209	1654	687	733	907	218	173	189	31	285	266	136	120	433	1007	185	111
Tb927.3.5060	1083	816	755	433	411	675	325	295	733	139	107	129	31	214	204	154	163	459	997	353	148
Tb927.3.640	891	438	320	116	71	584	202	292	483	229	124	140	31	300	394	242	178	249	861	356	168
Tb927.4.1680	1442	580	297	157	86	1001	373	376	759	255	176	141	31	328	390	216	159	497	1207	314	141
Tb927.5.1730	639	310	327	121	119	782	307	552	769	159	145	100	31	168	203	166	149	283	735	322	147
Tb927.6.5150	9241	1964	1623	683	657	390	267	167	474	96	51	162	31	230	201	138	249	699	1009	274	122
Tb927.7.4630	611	122	118	35	24	475	194	306	357	170	106	107	31	85	82	16	12	104	388	49	23
Tb927.8.2310	420	470	406	413	272	672	327	642	1128	92	49	76	31	144	166	249	218	151	368	204	73
Tb927.8.5330	786	250	181	61	35	493	238	215	329	222	179	117	31	187	145	66	40	251	437	148	70
Tb927.8.5580	15248	1884	889	1075	701	297	226	169	316	50	36	65	31	167	123	103	341	489	569	146	86
Tb09.160.2200	1954	327	210	98	67	303	218	176	189	152	156	75	30	127	64	23	36	201	249	60	41
Tb09.160.3320	2176	388	281	49	62	865	417	224	236	387	296	169	30	277	278	25	34	338	1018	97	65
Tb09.211.0100	1829	274	151	97	43	291	247	188	170	131	112	79	30	142	73	42	71	232	229	45	30
Tb09.211.0810	2116	267	294	38	64	398	214	132	166	167	135	117	30	85	62	25	29	176	276	40	24
Tb09.211.0900	551	360	418	78	91	437	179	217	379	122	113	98	30	107	148	78	56	173	763	258	107
Tb09.211.1695	872	169	129	82	88	369	122	324	557	97	104	79	30	47	42	32	36	29	182	38	15
Tb09.211.4170	1633	394	353	83	98	873	422	416	475	136	115	116	30	158	163	66	77	268	577	103	57
Tb09.244.2710	2066	274	193	141	68	619	282	226	241	194	182	83	30	223	231	95	57	310	694	184	116
Tb11.01.1120	1266	229	232	34	52	700	250	186	229	190	115	162	30	128	105	33	21	217	613	54	31
Tb11.01.1280	2908	655	406	148	101	1100	523	352	594	295	218	132	30	238	164	45	56	565	854	133	76
Tb11.01.6715	431	148	195	108	95	470	153	479	489	75	49	132	30	78	63	62	48	110	456	250	133
Tb11.02.0830	3171	576	446	210	164	547	374	187	356	162	123	124	30	139	124	43	57	434	455	92	39
Tb11.02.0880	13532	1899	1260	835	690	317	236	131	336	56	78	136	30	258	165	139	342	713	651	159	113
Tb11.02.1610	642	112	108	13	14	282	149	64	59	149	117	85	30	60	59	14	7	138	218	25	11
Tb11.02.1910	954	195	103	129	69	166	133	193	301	106	70	71	30	91	108	61	104	208	378	204	90
Tb11.02.2040	502	532	119	618	181	498	491	463	1159	37	25	26	30	52	128	176	235	119	510	233	164
Tb11.02.3050	2825	770	410	284	175	658	281	401	803	106	84	97	30	128	110	74	79	303	865	299	151
Tb11.50.0006	1603	441	294	271	141	723	299	386	570	150	97	92	30	273	251	168	255	303	534	164	102
Tb927.1.2570	2972	1539	877	619	400	592	426	240	661	76	56	81	30	335	299	257	657	674	1050	297	106
Tb927.1.2750	734	248	81	86	36	482	210	355	591	134	121	61	30	105	97	42	57	151	223	75	25
Tb927.1.3230	2326	415	268	72	54	703	536	194	183	220	298	80	30	112	115	9	28	371	314	39	23
Tb927.10.10320	330	213	201	112	131	464	152	333	508	114	81	278	30	137	166	112	57	199	931	458	249
Tb927.10.11020	2856	730	702	244	200	621	488	293	502	143	161	91	30	148	94	56	62	382	342	128	53
Tb927.10.2730	885	500	394	416	233	862	467	706	983	157	130	50	30	139	152	174	248	299	481	281	115
Tb927.3.4200	854	175	199	35	39	526	257	269	238	215	218	56	30	136	115	36	29	210	392	70	41
Tb927.3.5020	4464	1669	1379	937	591	529	547	388	784	124	148	180	30	216	137	87	289	531	505	170	97
Tb927.3.5520	3024	1731	1657	1182	883	669	377	326	1421	89	57	87	30	330	240	223	432	631	799	389	152
Tb927.4.1180	1013	218	227	76	87	731	284	379	534	163	118	170	30	180	212	50	32	224	951	156	81
Tb927.4.2890	2174	508	390	85	87	1144	566	373	362	272	176	134	30	363	212	145	178	687	876	239	140
Tb927.5.2080	1563	385	205	96	53	265	195	168	225	112	85	60	30	126	78	43	45	272	297	100	59
Tb927.5.740	805	237	156	87	76	581	201	348	442	178	143	275	30	121	151	14	11	120	557	87	53
Tb927.6.600	1332	301	209	170	111	648	258	259	349	178	139	36	30	289	298	35	22	280	385	138	40
Tb927.7.3160	15873	2118	1512	1069	895	298	227	186	443	41	58	129	30	190	115	137	357	521	692	215	140
Tb927.8.650	4078	1217	1036	586	494	312	223	95	401	69	58	103	30	202	170	119	211	410	573	241	99
Tb927.8.7990	15414	1544	766	760	584	272	239	136	303	52	49	105	30	212	157	119	323	709	684	217	153
Tb09.160.0460	2289	337	416	59	95	557	258	272	293	201	146	106	29	136	209	114	98	173	859	186	88
Tb09.160.1290	6163	572	274	222	133	209	203	171	283	72	58	163	29	107	94	63	112	252	336	107	70
Tb09.211.4520	1783	283	225	37	36	772	341	147	179	463	393	107	29	409	386	64	39	443	1213	97	31
Tb11.01.1210	1694	557	590	216	189	866	317	253	591	220	145	142	29	304	355	161	123	514	1142	260	128
Tb11.01.3010	12916	3413	1953	1612	1173	289	206	148	283	49	36	55	29	176	151	103	468	655	812	181	101
Tb11.01.5610	3747	944	934	193	188	798	312	123	361	224	141	183	29	372	231	54	42	684	1158	129	91
Tb11.01.6300	8583	1819	1069	528	515	200	127	115	273	24	17	89	29	111	82	69	158	436	574	120	78
Tb11.01.7670	3849	440	258	133	110	302	313	229	254	65	80	102	29	81	71	33	70	317	360	108	76
Tb11.01.8390	7662	763	418	226	212	462	279	140	300	116	121	155	29	271	174	98	223	485	646	164	91
Tb11.02.0210	1651	961	524	1181	504	734	517	429	2142	69	53	137	29	180	145	228	754	371	588	312	169
Tb11.02.3950	5730	974	811	217	312	447	250	173	388	76	62	172	29	323	220	142	191	408	614	161	85
Tb11.02.4910	1259	1319	1400	341	312	711	307	205	380	253	154	78	29	666	795	709	686	653	1363	688	318
Tb11.47.0015	4329	377	302	182	174	492	277	450	653	89	68	143	29	91	52	37	68	155	415	212	94
Tb11.52.0015	2022	326	240	47	52	517	265	204	177	189	100	160	29	281	326	50	29	369	1103	146	45
Tb927.1.3000	1238	368	357	60	57	864	359	159	132	339	221	160	29	539	395	166	150	695	890	119	65
Tb927.1.4500	1371	125	124	90	89	773	301	538	699	134	103	21	29	90	122	166	173	128	360	181	82
Tb927.1.4830	1064	252	441	104	186	1211	389	797	1172	153	192	55	29	78	114	59	36	118	538	122	71
Tb927.10.1190	2154	326	263	85	82	367	174	69	143	58	52	106	29	148	111	30	22	205	379	71	46
Tb927.10.12880	1323	259	262	41	50	902	331	141	146	271	218	133	29	189	158	29	18	269	647	70	51
Tb927.10.14150	1440	1470	624	1324	580	306	224	229	1237	74	50	52	29	230	254	237	383	202	369	191	90
Tb927.10.16160	936	141	94	18	20	548	238	100	96	232	173	79	29	153	169	13	7	194	602	43	30
Tb927.10.2560	957	266	372	68	92	570	229	174	247	205	179	69	29	180	164	150	126	383	893	443	176
Tb927.10.540	1311	2131	2131	2389	1852	365	157	182	1336	44	28	115	29	269	328	412	634	376	978	424	234
Tb927.10.7590	840	198	177	28	49	868	399	235	203	252	262	149	29	171	148	19	17	267	471	43	30
Tb927.10.7990	1050	484	227	88	35	586	188	89	182	193	92	103	29	245	290	94	63	240	811	204	131
Tb927.2.5010	1505	364	230	65	61	820	365	240	239	197	161	78	29	259	187	51	35	373	518	83	51
Tb927.3.4060	4366	680	372	359	105	1018	424	286	334	235	192	177	29	264	302	95	51	322	952	173	89
Tb927.3.4140	1704	427	365	59	46	953	347	139	195	268	167	133	29	403	346	105	64	587	1129	181	107
Tb927.3.5200	939	242	178	117	100	430	173	193	233	135	98	87	29	103	149	64	60	110	388	131	67
Tb927.4.4070	1021	297	335	77	79	886	335	253	215	154	116	80	29	142	149	118	105	280	644	176	129
Tb927.4.430	975	394	339	271	193	806	329	628	1147	143	77	86	29	285	332	302	242	204	1058	313	158
Tb927.4.620	7562	1088	766	279	330	302	200	110	312	77	60	111	29	195	114	69	119	449	695	134	56
Tb927.5.1530	1732	391	449	47	54	924	337	166	234	199	117	138	29	319	306	120	68	401	1047	83	78
Tb927.5.1700	876	232	124	106	59	325	146	265	331	137	107	39	29	69	60	56	46	111	155	34	23
Tb927.5.2020	3714	176	99	71	42	196	119	101	121	62	42	132	29	50	32	18	25	76	103	59	44
Tb927.5.2850	1573	481	235	213	95	625	344	278	705	158	85	78	29	300	303	285	301	379	607	210	128
Tb927.5.3400	3168	1218	605	735	427	373	281	132	400	57	34	101	29	300	240	161	368	561	636	382	150
Tb927.6.1870	1824	328	157	231	98	118	82	96	138	50	26	74	29	69	72	38	62	72	162	51	23
Tb927.6.1980	2220	536	719	255	288	651	224	175	501	134	85	145	29	560	633	568	361	533	1449	498	247
Tb927.6.2040	1944	221	98	29	38	410	225	110	111	194	190	132	29	111	115	42	53	180	367	60	32
Tb927.6.2260	644	311	356	46	32	1710	533	422	294	414	350	144	29	446	375	126	62	489	1189	186	130
Tb927.7.1690	1639	224	83	50	46	567	271	135	176	131	98	68	29	186	177	51	46	266	696	60	42
Tb927.7.190	2232	1255	2240	1029	1585	1700	798	845	1871	95	66	87	29	374	406	576	674	410	1259	516	244
Tb927.7.3420	615	252	238	168	148	322	157	283	516	55	60	88	29	138	171	165	137	180	539	287	125
Tb927.7.4290	954	525	387	126	95	504	189	145	384	186	126	94	29	301	363	154	114	292	959	275	87
Tb927.7.4420	979	427	186	156	71	566	296	381	741	111	93	126	29	238	242	218	155	280	782	307	220
Tb927.8.2110	1300	213	198	37	27	806	328	205	239	241	157	73	29	137	156	48	39	271	533	114	51
Tb927.8.3150	1769	2612	1636	2115	995	1192	767	726	1696	182	136	89	29	520	430	518	914	754	808	376	136
Tb927.8.6110	1546	796	479	859	401	693	416	599	895	155	129	71	29	139	119	102	181	259	310	146	66
Tb927.8.6240	942	842	338	831	255	869	433	662	1773	95	51	115	29	199	213	225	231	351	585	325	217
Tb09.160.0370	1274	738	735	197	205	907	397	172	446	152	125	70	28	329	358	212	158	372	1034	182	92
Tb09.160.0770	994	104	87	78	58	336	141	313	353	117	106	80	28	79	113	95	107	139	398	196	95
Tb09.160.5250	5134	892	420	266	177	221	160	70	217	67	34	114	28	133	114	61	95	335	450	90	44
Tb09.211.2530	1111	181	214	24	52	384	131	86	142	149	82	116	28	170	174	46	62	184	515	190	85
Tb11.01.1030	2776	329	91	39	53	229	189	31	57	64	30	42	28	127	92	34	43	212	325	35	17
Tb11.01.1530	621	135	82	48	19	114	129	113	145	66	60	43	28	44	39	16	23	188	149	67	56
Tb11.01.1630	2581	465	547	87	121	801	369	241	371	188	111	182	28	245	251	114	117	371	809	148	76
Tb11.01.2410	1719	395	427	43	47	341	176	38	70	108	50	55	28	110	99	23	22	216	396	48	33
Tb11.01.2480	3549	544	291	78	77	198	249	129	157	86	106	94	28	79	50	16	40	204	240	50	26
Tb11.01.2695	1749	430	284	167	112	540	302	426	544	188	121	103	28	171	104	51	47	283	343	145	90
Tb11.01.3160	1799	468	422	92	83	1082	558	369	371	322	262	62	28	237	241	124	101	339	676	184	112
Tb11.01.7730	999	208	262	38	52	728	254	164	206	281	206	109	28	203	134	17	10	415	730	66	45
Tb11.01.7830	594	260	243	167	133	449	233	466	399	44	44	43	28	130	221	194	220	117	522	205	100
Tb11.01.8470	1575	551	360	365	143	641	498	254	328	155	116	81	28	285	244	307	638	443	489	260	148
Tb11.02.0200	2899	304	218	69	67	583	504	240	245	113	111	65	28	127	81	33	33	339	342	64	48
Tb11.02.1280	5291	697	546	179	181	355	241	245	321	103	134	136	28	131	97	60	81	269	369	99	60
Tb11.02.1920	696	78	83	26	21	357	137	153	169	152	87	83	28	78	88	19	11	143	405	47	50
Tb11.02.4220	663	338	228	66	57	262	94	24	33	70	43	51	28	126	185	76	76	107	399	72	28
Tb11.02.4380	1349	567	501	140	106	658	262	144	283	208	87	94	28	422	434	215	132	450	973	168	109
Tb11.03.0390	1347	1387	725	1429	636	247	248	151	682	39	36	106	28	249	234	293	966	616	917	473	153
Tb11.12.0012	2190	428	360	70	72	332	167	115	166	92	52	87	28	128	85	27	29	251	296	52	36
Tb11.12.0016	2180	424	434	176	180	528	233	495	628	186	117	120	28	138	153	67	79	141	459	136	68
Tb927.1.3200	946	192	47	105	28	154	85	136	261	79	32	47	28	81	78	50	58	149	314	102	77
Tb927.10.10410	2136	332	316	39	35	929	494	145	115	315	285	68	28	140	106	20	28	467	450	53	36
Tb927.10.12290	1116	362	199	202	118	441	357	368	495	138	132	162	28	113	75	51	77	175	219	98	54
Tb927.10.12310	2769	346	250	60	86	473	287	94	131	96	84	169	28	83	69	21	15	247	301	48	43
Tb927.10.13710	996	732	593	529	339	250	128	106	605	81	53	62	28	253	298	312	412	248	598	345	147
Tb927.10.5820	3012	821	577	188	131	976	626	327	565	261	231	79	28	198	101	26	43	726	780	156	80
Tb927.10.6310	2589	829	622	108	91	773	299	104	203	181	97	137	28	489	287	111	149	744	1101	127	97
Tb927.10.6840	888	390	519	95	115	1114	412	392	589	270	259	87	28	335	364	277	220	407	1356	507	246
Tb927.10.7350	5385	826	409	278	178	420	422	310	344	94	116	135	28	205	126	75	201	408	476	125	62
Tb927.10.9560	1005	143	215	22	53	717	252	150	123	136	92	152	28	158	168	26	15	208	930	92	47
Tb927.2.2830	1547	117	195	41	65	839	317	625	612	189	222	127	28	102	87	46	23	177	713	153	52
Tb927.2.5020	2215	396	228	80	51	302	157	74	65	65	22	55	28	101	92	28	50	230	307	67	32
Tb927.2.5440	4842	702	567	171	148	725	443	320	427	171	136	149	28	148	103	52	88	368	458	116	85
Tb927.2.5820	3583	608	548	104	89	511	492	155	193	208	209	119	28	238	156	50	90	568	554	76	49
Tb927.2.6000	2342	1471	2218	1437	1850	2592	1309	2274	3193	55	61	45	28	133	215	213	403	210	846	226	64
Tb927.3.3330	609	152	180	98	109	544	245	411	788	100	103	105	28	135	165	198	144	232	1142	611	292
Tb927.4.1310	1424	401	353	41	49	506	200	40	77	200	122	117	28	308	236	38	21	464	961	45	44
Tb927.4.3850	1819	344	161	67	40	340	152	62	131	124	55	68	28	180	200	29	35	148	317	63	39
Tb927.4.4110	1569	347	258	57	54	653	262	116	150	137	87	130	28	159	116	42	29	268	499	85	41
Tb927.4.4740	1276	520	493	340	266	675	308	302	668	128	63	81	28	243	238	172	139	329	910	331	134
Tb927.5.1550	1053	329	357	297	214	484	267	347	589	109	84	130	28	107	103	87	82	182	304	109	64
Tb927.5.4420	2158	1307	1329	799	718	549	378	460	796	223	233	102	28	235	157	76	109	257	335	87	54
Tb927.7.3610	1443	444	575	129	174	1009	368	229	388	135	89	112	28	292	295	108	44	394	1168	149	93
Tb927.7.5810	1165	159	173	22	25	521	187	92	118	232	165	70	28	101	87	14	12	132	361	33	25
Tb927.7.840	419	76	80	42	39	494	205	465	474	100	101	128	28	124	145	77	53	164	508	244	78
Tb927.8.1680	696	244	181	165	98	298	92	162	477	91	62	83	28	153	185	155	121	150	489	201	117
Tb927.8.1870	2030	2205	872	2310	793	678	915	494	1498	42	37	60	28	358	289	464	1708	693	852	554	202
Tb927.8.4170	3663	409	332	69	65	867	420	195	243	233	203	132	28	153	154	52	37	280	1005	210	93
Tb927.8.4690	1446	176	164	35	46	427	207	313	339	165	147	138	28	179	173	60	38	201	582	167	86
Tb927.8.5100	8643	1252	631	430	345	200	184	161	303	64	60	88	28	145	104	76	209	348	272	124	76
Tb927.8.5910	946	211	174	41	35	470	179	144	291	174	109	134	28	128	124	48	46	183	512	166	83
Tb927.8.8150	1323	293	118	153	76	602	231	477	574	120	92	145	28	209	232	170	179	257	887	423	168
Tb09.160.0650	13809	2185	1179	1508	854	333	259	164	363	71	64	112	27	206	147	114	559	675	670	204	139
Tb09.160.1480	258	73	106	61	78	506	161	245	312	88	87	54	27	59	59	33	44	62	279	51	22
Tb09.211.4730	4081	282	220	132	126	165	159	149	192	49	47	109	27	63	54	37	52	154	191	76	33
Tb11.01.0580	2922	342	534	79	128	732	250	160	208	124	81	114	27	174	175	83	58	149	479	98	68
Tb11.01.3700	2148	581	585	141	126	841	417	195	328	163	128	125	27	525	320	197	163	561	894	161	83
Tb11.01.4990	594	127	120	13	32	404	123	139	140	192	92	150	27	126	145	18	14	166	574	38	22
Tb11.01.6780	1635	499	407	167	112	682	305	180	321	238	161	115	27	351	299	179	165	578	1235	345	186
Tb11.01.7050	4193	640	435	134	122	219	238	141	251	67	62	105	27	85	57	44	88	203	216	84	47
Tb11.01.7825	477	300	337	158	178	686	352	680	833	87	82	99	27	243	330	193	163	117	976	314	130
Tb11.01.8630	719	222	191	54	40	511	180	257	294	286	176	106	27	162	136	82	60	206	497	142	79
Tb11.02.0510	1818	335	331	59	49	727	341	99	107	438	347	93	27	191	106	10	11	379	555	51	18
Tb11.02.0770	5778	1585	1146	913	519	327	179	157	399	110	75	105	27	262	166	136	438	383	555	158	87
Tb11.02.2230	2334	280	227	49	54	785	269	285	333	364	246	181	27	194	212	41	35	247	868	104	55
Tb11.02.4250	1672	862	532	834	459	479	230	335	633	128	67	140	27	251	239	278	366	264	484	221	91
Tb11.02.4400	2296	550	144	403	130	381	392	220	683	112	54	36	27	111	109	93	305	248	317	123	71
Tb11.02.5000	984	191	82	18	33	205	110	44	69	107	72	78	27	216	315	66	47	210	670	93	75
Tb11.52.0002	11993	911	384	607	351	192	145	113	201	34	48	76	27	167	86	74	282	370	306	151	86
Tb927.1.3450	2419	663	626	331	245	694	401	389	767	149	98	99	27	295	253	156	196	382	481	136	63
Tb927.10.11140	4626	926	585	244	194	253	430	184	379	64	74	90	27	141	88	60	183	443	310	121	72
Tb927.10.11520	354	161	122	34	37	558	179	309	328	165	152	110	27	119	130	91	45	158	312	128	102
Tb927.10.13290	1239	478	652	226	249	1450	392	682	1642	145	87	199	27	118	114	57	39	321	795	224	100
Tb927.10.13610	2199	516	294	115	80	341	366	159	234	139	150	94	27	364	335	213	230	289	412	93	39
Tb927.10.13790	2043	395	152	305	108	498	405	313	565	134	90	66	27	304	283	361	605	307	353	170	87
Tb927.10.1730	1074	192	209	19	32	702	270	50	70	281	214	111	27	276	290	32	22	324	1011	46	25
Tb927.10.1760	495	28	16	22	3	104	38	155	135	50	35	133	27	18	16	9	9	35	62	29	33
Tb927.10.2370	1008	408	256	371	237	213	136	167	271	66	37	30	27	83	89	61	110	77	140	60	24
Tb927.10.2470	1653	453	442	105	163	880	430	384	984	89	50	73	27	174	211	147	121	381	1032	342	167
Tb927.10.3260	2112	817	710	608	447	436	435	410	1033	93	69	55	27	276	208	291	555	493	471	292	128
Tb927.10.4040	1047	266	324	33	43	1146	437	251	202	475	390	121	27	426	405	265	216	694	2180	669	486
Tb927.10.7930	1656	1315	650	1339	481	460	433	330	844	86	66	46	27	112	61	101	385	429	263	108	112
Tb927.10.8920	1020	395	705	132	201	1064	433	540	775	340	188	209	27	248	278	60	33	365	1315	258	97
Tb927.10.9680	1404	270	223	27	30	579	228	56	67	184	130	113	27	289	291	43	26	339	1062	69	49
Tb927.10.980	1944	310	305	53	53	516	328	100	145	198	204	82	27	78	49	18	22	247	347	50	15
Tb927.2.2650	10649	1333	889	685	459	361	321	213	446	108	101	136	27	227	115	85	237	498	507	162	108
Tb927.3.2180	473	221	256	111	92	549	216	362	608	161	122	167	27	189	205	127	81	237	624	234	121
Tb927.3.3380	1136	281	217	64	66	608	326	302	271	270	188	96	27	303	285	188	220	331	479	123	77
Tb927.3.4480	1067	135	114	17	19	226	112	83	105	80	65	99	27	58	101	29	22	97	302	60	24
Tb927.4.2390	2370	489	557	107	122	675	272	115	332	177	106	62	27	183	146	27	26	387	650	68	47
Tb927.4.450	3606	1644	1791	914	747	927	452	272	954	89	53	125	27	551	549	531	672	558	1113	224	94
Tb927.4.5380	4383	892	718	287	271	270	127	170	336	23	11	139	27	149	104	101	129	229	401	142	65
Tb927.4.590	2658	1479	1707	599	551	655	344	217	924	123	102	61	27	299	250	192	278	408	640	244	109
Tb927.4.660	3309	791	565	157	182	1278	633	621	800	340	294	180	27	362	299	117	107	615	991	219	78
Tb927.5.2350	1503	258	243	175	142	426	158	282	617	79	26	159	27	77	99	63	52	106	396	104	63
Tb927.5.3500	3405	411	540	167	193	700	255	305	453	120	97	200	27	199	203	71	63	268	906	238	125
Tb927.5.4130	3249	679	746	108	110	837	480	132	202	106	135	93	27	168	93	44	35	475	478	83	56
Tb927.6.3680	795	197	242	59	61	732	247	259	573	143	81	108	27	72	92	43	26	164	764	184	98
Tb927.7.1350	1233	172	85	36	33	411	179	133	197	152	100	101	27	63	66	18	11	146	290	51	44
Tb927.7.1670	725	298	278	106	113	552	276	304	530	89	47	56	27	131	182	163	131	160	485	136	59
Tb927.7.4510	1969	355	329	78	86	498	250	245	237	186	132	122	27	276	371	155	134	286	1287	259	115
Tb927.7.960	3000	758	594	393	273	262	193	147	356	40	33	138	27	167	93	84	169	335	419	134	56
Tb927.8.1360	12713	1171	795	528	519	379	270	197	356	96	88	131	27	187	126	136	268	538	753	219	101
Tb927.8.2390	5215	790	577	183	199	302	244	183	329	65	47	112	27	122	99	77	111	333	454	150	65
Tb927.8.2740	1700	427	313	260	130	542	269	502	661	140	152	235	27	242	201	91	129	312	779	173	93
Tb927.8.2770	9492	855	326	392	248	177	161	173	309	32	25	104	27	123	67	72	254	311	278	125	92
Tb927.8.5250	2525	898	578	190	148	792	413	268	450	266	254	89	27	403	249	202	260	575	734	206	97
Tb927.8.7510	1194	165	166	42	34	317	180	86	140	176	142	104	27	122	104	33	26	216	282	49	24
Tb09.160.0390	1371	538	683	69	58	1737	638	195	191	561	378	125	26	391	352	39	38	695	1549	86	47
Tb09.160.0690	754	174	142	46	27	484	230	214	350	159	86	102	26	130	129	24	17	181	547	57	46
Tb09.160.0970	2235	593	333	102	73	607	302	194	282	221	158	67	26	117	104	39	57	279	325	61	36
Tb09.160.1520	2538	839	778	164	320	1875	691	545	724	125	98	107	26	151	201	112	78	218	994	220	125
Tb09.160.2450	562	132	159	62	39	310	169	272	302	113	125	122	26	84	65	21	20	113	202	45	26
Tb09.211.1390	2177	1354	1604	1114	1341	833	355	382	2507	67	39	68	26	314	432	526	656	370	1235	471	246
Tb09.211.3955	461	575	870	999	980	3022	1376	4719	6246	109	80	42	26	168	261	345	420	230	1037	378	172
Tb11.01.0380	2267	499	447	120	94	637	276	362	479	144	92	133	26	259	224	108	140	326	841	156	95
Tb11.01.0390	12557	2980	1642	1260	865	390	153	131	356	31	21	105	26	183	174	137	371	600	928	225	86
Tb11.01.0410	927	197	265	123	119	293	177	176	234	128	83	62	26	84	67	49	78	161	356	117	31
Tb11.01.0690	3738	510	345	129	127	182	189	109	175	41	44	66	26	64	45	36	75	206	224	65	50
Tb11.01.0810	1524	409	470	35	59	984	372	128	144	250	161	99	26	215	187	36	15	357	915	75	32
Tb11.01.1660	1779	301	189	60	49	487	316	159	220	157	125	100	26	150	95	27	23	313	468	38	35
Tb11.01.2590	1383	347	205	131	99	299	239	379	479	120	95	55	26	75	69	43	114	110	179	62	32
Tb11.01.2750	783	126	96	17	21	471	217	187	181	124	89	89	26	77	69	18	8	120	233	35	32
Tb11.01.8070	1400	108	117	21	19	364	186	195	182	183	184	99	26	79	91	32	18	137	277	45	23
Tb11.02.3230	789	176	244	14	26	429	201	79	73	190	126	50	26	132	147	23	11	213	745	40	28
Tb11.02.5130	9146	1462	1008	535	447	392	209	173	472	80	62	170	26	275	164	124	238	804	863	206	125
Tb11.02.5310	2056	614	265	187	110	701	396	229	373	225	202	103	26	303	214	139	189	540	585	186	108
Tb11.42.0002	2359	311	493	75	128	1414	450	631	623	253	216	247	26	195	215	89	68	319	1470	371	162
Tb927.1.1030	2040	445	473	133	124	874	390	410	469	236	172	148	26	448	421	189	150	427	1431	326	204
Tb927.10.10120	1725	517	560	51	55	726	325	82	132	198	126	130	26	203	183	34	26	416	930	91	48
Tb927.10.10720	906	407	395	46	44	805	328	111	123	461	323	137	26	651	698	401	290	782	1954	704	367
Tb927.10.12890	2427	1710	1340	1459	996	1042	530	565	1945	120	72	123	26	259	164	140	303	580	817	346	115
Tb927.10.14210	480	169	113	38	35	274	199	220	264	81	72	52	26	68	82	61	53	104	231	95	65
Tb927.10.14530	1146	533	357	103	57	657	257	261	340	247	195	114	26	445	430	288	223	518	975	281	158
Tb927.10.15670	2055	425	292	76	65	615	324	158	163	261	232	63	26	183	158	81	70	356	480	106	52
Tb927.10.1740	1149	169	124	26	24	405	180	59	65	200	152	100	26	150	167	15	9	198	529	28	20
Tb927.10.3000	2358	628	297	158	107	286	282	203	242	59	62	114	26	99	74	30	90	308	244	93	46
Tb927.10.3010	3672	867	379	263	181	247	290	176	229	63	65	87	26	93	64	29	67	303	318	59	46
Tb927.10.3820	6444	1160	677	463	315	219	185	165	306	53	53	92	26	126	90	49	133	334	383	86	53
Tb927.10.4240	363	226	113	90	50	365	187	214	263	219	115	136	26	262	347	174	109	203	1317	496	289
Tb927.10.5400	1737	409	123	83	41	567	407	269	416	210	204	61	26	132	114	56	97	310	390	99	52
Tb927.10.6240	1212	362	182	67	61	1221	422	172	185	330	287	106	26	220	199	24	16	327	756	50	38
Tb927.10.7400	1563	253	175	34	20	623	247	101	113	221	222	96	26	149	135	21	21	324	521	47	34
Tb927.2.4750	1010	290	280	72	48	610	254	101	97	411	356	145	26	467	473	40	38	588	1702	90	40
Tb927.3.1620	4940	1074	583	234	183	293	175	101	308	53	45	105	26	189	131	74	157	476	613	147	67
Tb927.3.4210	5319	549	212	182	123	213	236	141	225	55	52	131	26	99	61	45	58	296	302	62	47
Tb927.3.4720	1997	2235	3208	1788	1929	1513	605	657	2955	132	61	118	26	727	882	1529	1418	912	2328	1041	472
Tb927.3.970	1285	326	262	71	60	1149	500	383	427	285	230	156	26	186	192	30	14	370	781	123	60
Tb927.4.1720	1141	393	318	45	48	692	328	92	121	202	146	112	26	344	430	140	73	462	1364	151	86
Tb927.4.2060	2449	670	487	305	203	298	180	101	405	81	48	81	26	172	168	152	212	338	523	205	99
Tb927.4.3980	2137	651	555	108	78	1004	405	269	321	389	331	139	26	176	132	36	22	283	588	90	44
Tb927.4.4930	4532	867	557	205	152	250	243	131	195	73	67	82	26	172	112	27	68	369	358	85	50
Tb927.5.1350	1655	256	246	38	53	882	284	380	367	249	199	142	26	94	122	37	34	224	575	87	36
Tb927.5.2330	15029	1858	1218	670	568	480	211	165	356	78	69	125	26	193	166	102	256	566	841	152	91
Tb927.5.3800	6473	4089	2978	3760	2428	262	157	121	379	23	24	39	26	115	70	85	410	227	205	104	46
Tb927.5.4530	1457	331	559	98	191	1652	495	918	978	194	204	185	26	117	167	79	38	145	950	211	104
Tb927.7.1500	936	247	190	44	49	263	158	81	98	137	96	69	26	88	68	41	39	142	243	71	47
Tb927.7.1810	1008	329	270	63	94	876	285	115	170	251	183	155	26	180	217	92	91	238	766	131	68
Tb927.7.220	1234	377	584	76	112	1583	566	319	479	372	195	224	26	341	471	207	117	399	1821	494	246
Tb927.7.3730	1957	319	136	140	73	300	188	184	265	82	56	86	26	90	110	75	86	127	293	64	41
Tb927.7.4640	2708	398	383	51	78	466	214	88	139	120	73	97	26	176	151	38	17	256	603	78	46
Tb927.7.5100	1186	202	183	37	42	559	262	291	393	224	189	102	26	107	111	8	16	191	584	62	47
Tb927.7.5620	2215	324	363	51	57	765	296	149	188	179	126	111	26	146	136	33	23	232	850	95	65
Tb927.7.6470	2101	236	174	47	33	497	196	56	95	86	61	144	26	102	128	49	36	197	509	70	43
Tb927.7.6670	9927	797	344	339	233	158	147	153	323	42	26	123	26	121	69	58	188	161	140	53	37
Tb927.8.2970	969	185	209	92	110	510	225	287	459	88	102	69	26	130	120	111	105	160	357	148	68
Tb927.8.4320	6057	819	576	338	397	645	385	374	784	109	92	104	26	198	151	160	239	315	510	137	78
Tb927.8.5380	428	173	131	53	44	298	162	206	307	120	114	170	26	219	250	159	98	171	554	280	155
Tb927.8.5490	2028	759	613	132	89	478	236	109	162	165	119	96	26	218	192	34	23	234	350	56	27
Tb927.8.6740	1954	357	202	93	83	847	350	354	511	209	113	71	26	208	170	56	51	341	459	68	30
Tb09.160.1670	657	171	144	21	28	1287	452	681	648	245	168	106	25	99	116	18	15	257	667	150	90
Tb09.211.2720	1059	203	289	32	41	544	195	38	49	179	159	58	25	219	240	35	25	237	833	64	30
Tb09.211.4810	5127	962	859	195	228	258	212	137	260	93	78	111	25	194	130	63	134	413	443	67	48
Tb11.01.1360	906	330	322	142	108	621	237	284	444	257	165	185	25	216	193	74	46	331	773	275	126
Tb11.01.1810	386	104	78	18	13	260	138	107	69	172	126	70	25	125	176	62	31	119	502	67	56
Tb11.01.5730	1931	722	596	521	437	1129	512	656	955	167	113	74	25	184	204	170	195	269	594	204	96
Tb11.01.5860	1657	1952	1017	1784	762	292	136	142	729	100	64	82	25	553	393	439	640	548	747	376	197
Tb11.01.6710	3231	578	516	132	143	308	164	118	207	74	50	108	25	161	108	63	84	274	372	108	39
Tb11.01.7910	2997	519	441	89	67	722	476	149	227	124	90	95	25	146	139	33	36	419	508	65	31
Tb11.02.0465	374	99	82	11	11	398	210	100	112	231	198	65	25	143	184	32	15	183	740	44	27
Tb11.02.0520	2274	493	452	44	84	872	272	118	141	269	219	135	25	231	153	32	20	358	834	61	36
Tb11.02.0940	2190	296	248	41	59	671	400	199	196	166	148	99	25	113	94	25	19	312	405	77	37
Tb11.02.1310	2288	289	240	83	90	1063	413	313	323	201	197	106	25	157	168	50	44	251	921	78	57
Tb11.02.1340	4898	1088	491	258	207	380	383	126	275	80	84	68	25	181	132	52	101	427	460	99	66
Tb11.02.2560	2378	560	494	160	120	847	541	262	353	69	52	91	25	132	129	56	121	221	464	57	45
Tb11.02.5250	491	493	435	429	375	588	195	442	1466	93	60	184	25	169	209	158	118	156	654	239	145
Tb11.52.0003	2303	1520	1325	696	453	1078	862	700	990	335	324	88	25	173	122	95	211	557	439	206	90
Tb927.1.3150	1034	280	341	63	87	720	272	255	296	163	108	85	25	157	168	95	47	189	418	113	73
Tb927.1.890	1498	251	406	131	212	533	310	462	657	91	52	150	25	108	125	88	65	147	681	276	152
Tb927.10.13770	342	45	57	41	21	204	71	161	231	74	51	181	25	126	156	89	37	106	376	131	95
Tb927.10.4680	897	87	66	20	19	507	215	247	226	177	122	115	25	117	104	18	10	148	385	29	18
Tb927.10.4910	2115	423	406	65	83	675	325	157	202	186	162	159	25	169	96	37	42	283	426	71	51
Tb927.10.7360	1941	364	357	46	51	749	369	100	95	294	211	101	25	373	342	62	51	459	867	53	46
Tb927.10.7580	3033	363	201	105	91	260	219	91	145	71	42	132	25	105	66	32	43	248	289	67	37
Tb927.10.8070	1479	397	306	62	62	515	212	144	223	193	141	59	25	99	85	18	23	215	421	65	26
Tb927.10.8080	2223	815	717	90	113	1084	489	147	218	185	126	77	25	314	229	64	89	667	791	87	60
Tb927.10.9170	546	244	246	121	91	228	129	170	476	99	76	127	25	78	88	61	53	128	492	206	100
Tb927.10.970	5271	912	562	297	205	166	153	79	180	36	29	90	25	136	101	91	210	346	348	81	60
Tb927.2.4140	2351	641	628	90	93	770	373	151	223	199	160	101	25	172	111	49	40	323	419	77	47
Tb927.3.1310	3762	765	350	213	175	267	233	180	286	38	35	107	25	111	75	46	83	332	342	89	48
Tb927.3.1410	1439	168	268	121	117	1161	354	747	670	197	198	101	25	140	154	134	80	240	1104	345	211
Tb927.3.2620	7155	963	659	257	178	1012	596	242	317	319	236	96	25	278	211	52	71	727	1302	161	101
Tb927.3.3900	1935	414	206	76	59	299	223	79	90	144	79	40	25	231	174	111	140	348	289	81	64
Tb927.4.1330	2239	618	350	370	200	129	152	84	300	29	23	55	25	40	54	51	205	92	151	52	29
Tb927.4.3000	1361	235	161	37	32	510	166	61	99	149	69	127	25	187	206	22	15	256	600	45	24
Tb927.4.870	13816	5313	3147	2942	1986	365	215	167	493	69	49	101	25	231	194	119	525	684	851	245	113
Tb927.5.1760	2193	1009	805	532	389	210	141	116	218	48	47	82	25	140	101	40	136	225	243	83	38
Tb927.5.2890	6579	1153	726	362	292	187	129	145	223	36	22	76	25	133	99	65	172	437	454	147	93
Tb927.5.3580	1389	144	155	35	48	223	109	126	149	98	81	139	25	103	71	63	41	108	331	91	51
Tb927.5.780	1590	376	203	61	45	1086	505	619	673	392	273	138	25	270	249	113	130	554	701	238	124
Tb927.6.3420	1432	215	184	33	24	391	164	42	64	232	142	73	25	138	150	12	9	186	499	17	19
Tb927.6.4000	1385	910	899	498	573	628	295	358	953	96	71	112	25	328	385	310	264	400	948	479	207
Tb927.6.4770	3279	960	404	786	319	502	444	263	681	58	34	41	25	202	202	259	661	367	553	190	98
Tb927.7.2560	3929	424	327	96	86	343	280	135	175	93	96	96	25	112	83	34	41	289	336	61	40
Tb927.7.2590	652	479	343	194	139	488	224	349	503	144	99	122	25	213	261	95	61	161	526	121	59
Tb927.7.2980	638	154	108	88	83	387	148	232	395	81	58	126	25	83	130	55	53	60	492	107	76
Tb927.7.4760	1674	174	130	29	31	541	281	80	101	199	137	56	25	175	168	29	30	231	365	50	32
Tb927.7.7440	2208	214	233	64	55	669	286	248	213	160	115	66	25	204	191	137	65	237	819	196	141
Tb927.8.1470	2664	150	138	38	44	656	339	393	332	200	178	104	25	161	114	43	17	272	334	102	65
Tb927.8.1480	7407	721	472	260	261	269	208	169	245	73	82	125	25	174	108	73	167	381	406	102	77
Tb927.8.2810	2607	491	297	99	60	319	246	64	117	134	110	74	25	136	95	25	35	300	298	48	34
Tb927.8.4350	3181	375	255	109	85	418	248	140	199	125	90	132	25	107	84	46	30	233	343	79	60
Tb927.8.5040	1144	232	147	27	21	445	171	74	93	198	160	63	25	130	117	8	11	150	229	20	17
Tb927.8.8270	3901	528	504	89	110	690	254	174	217	134	112	76	25	189	170	31	40	251	631	80	31
Tb09.160.3680	138	162	88	84	90	113	51	149	189	65	73	39	24	62	65	41	37	14	134	51	10
Tb09.211.0860	1455	363	284	46	50	835	341	198	239	169	118	124	24	177	154	27	18	258	669	76	39
Tb09.211.2990	1792	241	228	41	53	274	132	283	212	71	55	45	24	82	112	20	34	96	436	75	39
Tb09.211.3160	6324	675	397	213	171	306	128	116	237	51	33	140	24	150	128	61	100	281	487	140	84
Tb09.211.4360	2820	706	671	169	143	812	504	198	317	150	87	90	24	244	130	37	48	363	336	58	30
Tb11.01.0780	366	103	125	52	38	411	183	279	218	111	149	125	24	101	122	95	58	108	601	211	94
Tb11.01.1320	1638	298	380	50	48	703	263	75	108	384	273	96	24	298	275	22	19	455	1197	68	23
Tb11.01.3050	1482	318	288	37	37	968	338	133	158	215	154	102	24	281	324	32	17	385	830	55	30
Tb11.01.3710	1099	215	197	40	36	570	205	162	197	158	105	164	24	221	177	38	19	344	721	98	66
Tb11.01.4550	453	57	32	16	9	191	42	41	43	50	19	215	24	30	28	17	9	45	184	26	33
Tb11.01.4610	1734	234	172	27	30	469	213	83	109	174	153	76	24	131	124	27	20	155	443	44	17
Tb11.01.4650	1673	151	86	45	28	243	214	90	82	96	107	68	24	91	74	17	17	230	175	45	31
Tb11.01.7920	3411	122	44	31	35	148	113	37	43	50	37	49	24	111	90	18	26	265	338	43	26
Tb11.02.4890	1081	236	277	129	174	519	262	580	632	169	89	159	24	198	235	178	149	198	948	348	181
Tb11.03.0760	2627	673	471	81	91	555	300	107	266	103	99	66	24	180	128	60	111	355	511	113	65
Tb11.27.0001	5451	961	788	354	413	512	251	218	429	88	69	160	24	207	126	85	95	326	435	152	80
Tb11.47.0033	3552	723	581	113	127	176	89	60	134	29	13	61	24	153	148	50	46	286	480	85	46
Tb11.55.0006	2662	640	459	308	202	604	530	310	411	151	114	44	24	220	219	167	324	371	410	108	62
Tb927.1.3190	303	135	56	76	69	43	16	39	81	20	23	74	24	71	64	38	27	24	169	117	39
Tb927.10.10310	1446	252	239	35	34	582	278	82	107	262	184	83	24	150	137	21	14	288	501	43	13
Tb927.10.11000	1017	167	184	33	30	754	287	271	238	301	218	107	24	84	53	8	13	186	286	34	29
Tb927.10.11170	5424	809	474	191	152	246	270	147	259	75	57	98	24	149	87	62	94	361	419	69	41
Tb927.10.11180	2265	275	303	53	55	790	363	109	195	229	147	129	24	276	219	33	21	349	604	59	42
Tb927.10.12230	1302	379	308	47	47	673	249	186	198	244	166	112	24	139	109	22	20	346	846	127	77
Tb927.10.13280	7939	2479	1880	952	711	284	189	149	352	64	27	130	24	218	123	74	184	361	576	127	68
Tb927.10.15080	4905	695	360	208	147	328	214	152	316	71	62	101	24	226	133	68	76	395	416	78	55
Tb927.10.1770	795	79	28	17	12	243	120	124	181	55	42	89	24	69	81	28	23	120	339	96	67
Tb927.10.3790	11706	794	422	442	299	245	109	152	228	41	30	85	24	136	99	79	209	224	338	167	76
Tb927.10.4780	1677	741	750	152	162	793	340	129	266	238	174	121	24	274	247	168	176	424	809	183	98
Tb927.10.5630	558	340	339	53	39	437	283	69	99	186	126	54	24	170	230	94	69	291	1128	145	66
Tb927.10.6610	825	406	232	126	68	407	155	238	369	169	105	64	24	223	190	65	49	237	556	126	42
Tb927.10.7670	729	185	78	37	14	366	202	138	153	143	115	95	24	82	68	20	12	124	247	51	34
Tb927.10.8040	2088	988	442	136	81	556	233	120	345	156	89	54	24	425	396	259	359	581	833	206	94
Tb927.10.9570	3249	3183	4068	3305	3739	421	215	254	1612	18	11	55	24	217	288	342	654	219	968	251	123
Tb927.2.2950	2913	314	144	64	42	316	180	76	151	91	73	58	24	144	90	19	24	179	250	33	15
Tb927.2.4710	1848	1299	909	1382	809	1300	1177	1773	2671	63	67	66	24	176	152	207	419	271	481	254	63
Tb927.2.5480	2887	288	134	53	60	180	126	90	116	98	77	90	24	101	93	29	39	156	243	74	43
Tb927.2.5530	5684	761	376	241	205	384	202	247	294	122	94	157	24	157	124	62	153	291	479	114	70
Tb927.2.5980	2707	492	334	94	113	447	215	124	318	124	77	86	24	438	460	251	285	1379	2222	1182	517
Tb927.3.1080	906	257	391	115	154	1115	465	1126	1342	219	145	191	24	257	274	159	115	227	1080	420	172
Tb927.3.1390	1706	322	492	39	73	1385	525	548	696	278	220	82	24	175	197	117	101	410	1075	334	135
Tb927.3.2730	5346	644	428	199	151	188	190	91	189	37	43	88	24	114	82	44	76	262	270	90	46
Tb927.3.3360	1401	284	294	111	78	571	333	244	353	115	59	115	24	116	79	71	58	249	485	150	87
Tb927.3.4220	2601	385	328	58	68	373	285	108	154	94	79	95	24	131	90	37	56	337	382	55	35
Tb927.3.4350	2394	360	273	49	63	420	256	108	146	176	137	108	24	146	86	30	28	271	375	64	34
Tb927.3.4610	9306	972	534	441	293	181	101	117	189	26	21	65	24	67	49	37	164	178	217	66	34
Tb927.3.5100	3015	347	296	85	75	451	223	76	150	155	108	68	24	205	133	31	32	341	567	62	42
Tb927.3.5550	615	374	576	266	317	744	311	553	879	114	46	101	24	198	291	276	238	321	1218	581	263
Tb927.4.1550	1356	670	397	474	229	705	519	631	869	188	153	87	24	202	132	116	187	354	342	159	83
Tb927.4.1850	1869	759	397	138	89	806	370	269	580	188	124	82	24	351	341	168	139	509	966	219	123
Tb927.4.3100	1447	267	235	84	62	522	306	325	297	289	248	100	24	108	79	25	30	179	337	70	30
Tb927.4.3300	2212	391	303	55	56	716	298	136	209	208	106	92	24	246	204	83	74	410	722	129	58
Tb927.4.3340	2021	248	176	66	64	231	127	99	126	97	95	79	24	84	50	34	61	98	153	52	38
Tb927.4.3480	624	212	334	63	100	1017	309	690	646	175	184	266	24	379	435	335	130	450	2472	870	430
Tb927.4.960	3537	813	486	96	122	562	269	78	144	232	185	135	24	592	340	119	148	695	888	92	63
Tb927.5.1520	1710	415	106	171	69	323	199	155	424	49	44	80	24	116	144	95	106	217	450	191	116
Tb927.5.1950	2657	484	245	112	78	363	207	174	195	87	69	118	24	118	117	92	85	155	319	85	31
Tb927.5.2180	1492	412	440	72	60	1749	708	221	231	490	424	158	24	380	323	44	21	561	1382	78	50
Tb927.5.2290	6833	1399	805	409	287	274	179	113	306	65	66	114	24	193	148	69	185	469	582	147	78
Tb927.5.4370	672	73	52	31	31	470	131	290	350	106	57	121	24	106	138	36	46	92	616	111	80
Tb927.5.710	3617	496	363	106	124	543	415	254	338	156	127	137	24	170	118	54	54	393	511	90	54
Tb927.6.1260	891	465	548	79	103	788	395	196	307	224	163	100	24	528	633	434	244	472	1521	584	297
Tb927.6.1480	4642	1443	1133	631	462	385	330	221	716	68	72	97	24	144	113	80	117	502	628	196	101
Tb927.6.3870	754	356	280	90	90	569	227	250	462	106	85	38	24	177	174	88	71	221	532	158	98
Tb927.7.1490	802	124	67	20	13	271	118	76	122	118	89	78	24	87	103	12	6	139	354	20	19
Tb927.7.4740	1183	214	115	39	37	451	225	272	300	212	162	75	24	159	206	126	101	237	735	292	142
Tb927.7.5410	2721	900	485	281	172	411	261	87	219	76	49	59	24	201	141	93	173	425	456	95	36
Tb927.7.6480	3138	338	241	73	52	452	288	124	164	107	83	124	24	90	64	28	29	241	279	53	34
Tb927.8.1890	823	296	258	95	91	642	311	321	349	109	83	106	24	84	55	18	19	165	341	59	30
Tb927.8.2400	1748	182	210	52	52	562	220	239	282	187	120	180	24	90	106	18	18	130	490	88	38
Tb927.8.2500	768	96	69	25	20	442	200	117	115	190	123	66	24	71	51	6	8	155	223	18	14
Tb927.8.2520	2250	857	442	668	299	431	408	354	626	102	78	90	24	131	97	66	281	401	262	136	71
Tb927.8.2730	1149	143	76	20	30	212	84	40	71	96	63	61	24	149	166	21	21	246	606	57	34
Tb927.8.590	3250	500	429	150	174	608	213	425	597	149	56	146	24	209	180	83	63	252	805	234	100
Tb927.8.7200	3386	645	293	119	80	251	107	54	131	86	39	122	24	353	303	56	37	506	1022	112	56
Tb927.8.850	2742	258	259	66	97	306	173	105	177	93	54	91	24	164	133	74	66	262	475	89	47
Tb09.160.0790	2337	653	392	206	123	605	490	338	387	212	180	95	23	205	138	38	94	400	394	94	52
Tb09.160.1250	3843	1012	953	165	220	686	389	195	320	111	67	141	23	173	164	65	73	439	548	102	60
Tb09.160.2160	356	184	72	34	24	555	251	414	509	155	109	152	23	109	113	29	28	181	389	169	109
Tb09.160.2250	601	217	94	47	25	280	149	193	298	141	114	71	23	69	65	25	19	117	202	58	27
Tb09.160.3470	3868	728	524	176	181	154	97	90	151	31	10	80	23	147	123	84	116	219	336	148	79
Tb09.211.1380	1478	463	475	262	219	882	438	908	1314	184	144	233	23	333	381	330	175	470	1514	742	380
Tb09.211.4860	1191	206	208	51	48	240	188	99	91	81	82	27	23	93	44	27	29	159	139	30	25
Tb11.01.3190	1694	333	223	41	36	402	186	62	108	159	95	71	23	226	225	21	15	257	492	33	19
Tb11.01.3350	2090	569	531	97	104	461	309	240	373	56	46	99	23	62	59	60	87	240	212	101	61
Tb11.01.4830	1565	1222	404	860	259	838	417	865	1541	84	47	73	23	472	357	298	372	523	760	347	195
Tb11.01.5260	1502	300	315	68	73	729	360	431	425	247	172	114	23	319	438	285	177	341	1435	318	205
Tb11.01.5700	2291	190	146	67	67	499	231	526	476	149	168	121	23	97	110	32	20	156	533	108	49
Tb11.01.7540	3111	274	101	63	75	361	177	91	150	121	83	144	23	153	130	27	22	323	501	54	41
Tb11.02.0570	1756	521	322	105	57	458	274	104	193	199	176	76	23	244	232	38	44	253	440	62	31
Tb11.02.1370	2094	373	337	111	111	572	270	190	298	121	73	114	23	229	176	51	50	299	673	99	58
Tb11.02.1810	4763	518	202	139	120	243	197	172	227	41	41	86	23	144	123	57	89	306	317	107	57
Tb11.02.4270	4527	750	355	195	147	246	161	105	224	40	46	97	23	118	80	64	66	355	473	120	71
Tb11.02.4900	579	185	122	63	36	278	170	340	380	154	147	141	23	155	125	56	42	222	505	222	90
Tb11.52.0019	393	88	63	25	15	210	89	125	158	117	77	84	23	86	79	18	19	69	301	79	39
Tb927.1.2990	3081	423	196	112	88	223	262	108	194	22	21	66	23	52	44	24	54	164	137	50	27
Tb927.1.3290	3110	602	605	145	160	287	194	85	169	42	36	78	23	98	75	49	97	209	191	76	26
Tb927.10.10170	1335	276	236	40	25	384	218	34	49	174	187	62	23	166	177	29	26	365	369	28	28
Tb927.10.10330	1674	305	226	49	38	587	243	73	120	146	92	119	23	288	284	51	25	342	993	60	46
Tb927.10.12140	2376	303	296	35	65	364	197	58	121	106	79	101	23	102	72	27	19	197	303	40	29
Tb927.10.12320	1212	177	165	37	33	267	112	42	67	94	65	108	23	89	85	13	10	140	290	24	13
Tb927.10.12340	2679	212	178	68	62	237	128	76	100	76	97	97	23	104	50	31	21	183	169	37	28
Tb927.10.1490	3663	1211	614	742	420	369	456	231	392	54	55	184	23	193	214	103	345	408	654	178	64
Tb927.10.15320	315	185	205	165	185	552	222	586	938	62	48	77	23	72	94	120	99	99	358	163	89
Tb927.10.16110	1161	291	234	32	29	452	180	96	131	176	91	88	23	262	184	51	34	368	616	57	45
Tb927.10.3640	855	406	405	232	274	620	236	322	1042	59	43	81	23	92	110	95	87	161	434	199	103
Tb927.10.4770	1341	448	158	179	105	602	314	262	348	155	133	34	23	267	263	220	222	325	875	239	109
Tb927.10.530	2067	927	923	584	515	1330	562	619	1182	107	76	66	23	205	195	374	389	297	763	208	86
Tb927.10.6220	2406	605	426	111	100	306	127	54	141	113	49	90	23	212	192	54	57	213	460	99	47
Tb927.10.6330	4785	716	375	372	235	170	195	149	285	60	46	113	23	131	98	73	229	318	338	143	72
Tb927.10.7600	1098	232	172	38	29	437	202	41	55	172	157	78	23	194	191	45	30	287	541	39	24
Tb927.10.8130	1235	205	136	34	26	533	252	221	169	143	114	58	23	109	56	19	6	178	290	34	36
Tb927.10.8150	906	159	68	40	24	304	159	161	163	62	47	76	23	65	61	18	28	187	292	70	24
Tb927.10.8400	893	250	185	38	33	483	197	160	155	113	69	127	23	140	133	28	19	173	459	113	95
Tb927.10.8420	7299	1128	1100	345	321	183	145	87	171	56	57	102	23	144	109	76	202	467	371	139	63
Tb927.10.9050	2037	546	699	62	83	798	283	60	144	284	220	130	23	339	308	41	38	405	881	96	50
Tb927.2.2260	12834	1276	601	803	483	192	92	83	164	14	13	33	23	64	55	55	186	241	297	56	35
Tb927.3.1790	1177	450	564	500	417	731	352	627	1077	60	30	61	23	137	161	300	294	356	794	601	272
Tb927.3.2170	2931	830	664	117	85	1308	658	215	305	424	368	116	23	273	220	43	43	519	809	89	51
Tb927.3.4030	3653	391	169	89	90	163	292	108	145	84	84	108	23	71	54	18	45	212	116	44	14
Tb927.3.5090	883	277	347	87	141	792	238	560	971	123	86	32	23	106	140	143	152	190	567	256	131
Tb927.3.5230	1874	264	164	48	57	465	265	135	166	140	135	61	23	120	92	18	17	234	393	52	37
Tb927.4.1230	1022	665	701	555	729	592	399	577	1628	51	39	48	23	232	317	418	645	162	678	295	182
Tb927.4.5000	2580	694	510	121	85	319	236	93	103	109	74	76	23	184	108	46	87	398	449	49	24
Tb927.5.2120	2577	323	229	189	172	336	295	371	531	60	47	100	23	71	60	67	243	232	473	170	56
Tb927.5.3330	14336	2473	1726	1040	936	367	152	155	397	35	28	97	23	139	98	119	313	428	566	175	109
Tb927.5.700	2519	653	406	398	240	417	421	427	568	128	109	83	23	123	94	101	191	480	477	205	104
Tb927.6.1210	1451	140	104	59	44	380	141	368	412	118	88	130	23	114	188	113	83	166	603	227	112
Tb927.6.1930	1226	254	405	97	134	908	266	298	383	137	103	110	23	111	125	63	26	170	643	146	47
Tb927.6.3670	9669	1486	1285	447	473	281	184	121	348	42	47	72	23	234	175	114	209	581	936	188	105
Tb927.6.650	4739	1027	665	347	244	317	297	187	346	115	67	88	23	170	119	62	168	419	307	120	68
Tb927.6.670	1168	89	42	15	12	240	124	50	47	243	144	166	23	75	91	8	2	83	198	16	17
Tb927.6.950	2462	1540	1195	820	679	894	476	497	1542	76	53	74	23	210	172	154	330	333	712	253	110
Tb927.7.1010	587	132	54	10	7	333	175	51	36	132	119	54	23	177	216	61	35	166	541	57	55
Tb927.7.2170	4497	1600	1487	614	426	347	177	139	456	41	28	75	23	187	118	65	135	252	363	115	37
Tb927.7.3050	3600	698	524	118	126	248	298	99	201	95	101	78	23	110	57	26	33	294	195	47	42
Tb927.7.3120	624	272	203	98	97	228	115	137	263	109	66	47	23	101	146	101	105	133	379	174	78
Tb927.7.4010	1225	100	76	43	35	249	119	167	188	140	155	139	23	165	195	153	114	115	385	162	93
Tb927.7.5480	1584	603	673	421	320	508	273	247	565	103	77	65	23	108	76	93	77	222	369	142	61
Tb927.7.6890	1007	333	179	99	47	340	164	192	303	140	103	74	23	185	164	115	117	302	415	159	82
Tb927.7.7460	676	577	623	352	380	370	330	344	674	53	28	140	23	218	314	287	260	149	1018	417	194
Tb927.8.1650	2529	252	246	58	63	276	91	111	126	101	51	108	23	112	103	27	27	115	238	47	32
Tb927.8.1790	734	168	165	121	88	471	228	307	375	48	60	41	23	24	27	21	10	56	135	49	13
Tb927.8.1860	3199	468	253	58	52	373	323	90	145	112	83	77	23	178	121	26	30	341	421	60	26
Tb927.8.3080	4117	206	115	83	49	106	127	86	134	68	92	80	23	87	73	29	48	227	169	51	49
Tb927.8.4770	1226	156	121	33	36	283	132	85	85	141	81	78	23	175	189	115	67	162	579	131	72
Tb927.8.5850	12831	1478	849	670	641	256	134	178	401	44	30	118	23	161	116	96	241	366	453	171	78
Tb927.8.6300	1794	585	564	185	129	674	313	178	287	194	122	111	23	313	302	131	63	376	817	162	89
Tb927.8.7720	678	191	78	130	53	421	206	349	487	81	65	64	23	89	90	69	67	209	343	151	86
Tb09.160.3110	1688	468	433	52	49	709	255	62	105	150	76	100	22	367	316	70	66	399	922	64	38
Tb09.160.4210	6572	782	446	211	136	203	131	133	205	50	53	83	22	144	109	59	130	359	383	108	75
Tb09.160.5120	4956	452	363	145	134	460	538	265	380	85	92	118	22	144	84	43	53	349	279	69	48
Tb09.211.0730	1225	318	362	110	97	961	339	251	332	263	176	135	22	183	159	42	33	352	699	113	61
Tb09.211.1130	1107	454	204	432	135	533	435	320	483	36	30	94	22	87	116	61	140	149	408	130	44
Tb09.211.4880	1340	231	226	35	31	322	151	54	70	125	122	66	22	120	94	15	8	218	436	28	27
Tb09.244.2150	2118	475	453	272	363	828	379	802	1090	91	85	71	22	138	179	157	163	104	468	115	76
Tb11.01.1330	917	307	236	43	37	1089	397	102	100	346	326	123	22	275	236	29	17	422	797	42	35
Tb11.01.1950	3760	362	258	100	89	515	381	206	351	111	67	102	22	100	57	19	24	288	395	58	42
Tb11.01.2010	1510	156	155	35	56	464	223	301	319	198	146	70	22	109	100	52	39	153	569	100	39
Tb11.01.2320	2593	231	211	48	53	245	192	69	76	50	30	44	22	50	36	18	22	143	177	38	19
Tb11.01.3550	1309	947	735	1082	608	882	547	887	1601	100	92	74	22	236	232	341	521	507	669	381	174
Tb11.01.3930	3940	898	821	176	221	749	435	110	239	123	119	90	22	212	112	31	67	480	465	81	50
Tb11.01.5140	1938	178	121	22	32	349	171	66	67	131	107	67	22	94	86	24	15	164	238	20	26
Tb11.01.5355	934	170	114	40	23	352	125	190	239	126	56	143	22	159	206	88	41	184	607	203	144
Tb11.01.5650	3629	717	663	138	192	609	378	127	224	72	47	98	22	178	124	89	121	306	453	101	59
Tb11.02.0560	702	281	382	99	115	421	185	193	439	121	64	113	22	114	162	90	61	209	672	307	128
Tb11.02.1940	1488	260	243	39	37	426	236	91	109	150	108	134	22	98	97	17	16	186	385	58	35
Tb11.02.2100	4346	837	497	155	137	307	271	148	204	89	78	135	22	122	78	40	76	360	365	76	48
Tb11.02.2630	3157	512	605	88	133	780	336	178	220	279	244	87	22	181	149	40	39	281	464	64	35
Tb11.02.4570	2052	547	398	109	64	193	92	47	88	47	26	34	22	141	85	28	20	156	181	44	21
Tb11.02.5030	2920	539	582	113	98	600	336	120	238	192	132	102	22	288	256	92	73	415	800	106	62
Tb11.02.5140	804	107	103	23	18	333	116	122	123	127	86	82	22	73	76	11	10	105	375	43	18
Tb11.02.5720	2844	1582	1469	1178	833	607	523	307	861	76	63	73	22	261	202	196	657	440	643	234	83
Tb11.02.5730	2911	612	687	156	168	548	336	200	323	140	89	113	22	167	124	54	63	369	588	112	60
Tb11.02.5750	696	116	118	20	19	462	204	220	216	201	164	102	22	97	107	14	7	133	400	70	27
Tb11.02.5760	1317	272	311	62	69	631	364	198	139	191	205	70	22	138	110	87	96	315	431	91	45
Tb11.52.0016	1778	257	266	74	55	323	245	188	191	179	157	67	22	122	109	53	104	172	218	66	35
Tb927.1.1530	5937	947	690	359	225	262	142	130	248	47	37	58	22	101	127	86	159	119	335	86	29
Tb927.1.2770	1234	203	117	36	27	452	190	60	89	135	116	120	22	157	168	17	10	239	488	36	13
Tb927.1.4250	2373	352	276	52	57	370	255	70	125	111	86	73	22	99	64	20	21	231	300	44	30
Tb927.1.5030	2251	317	378	69	75	652	221	98	180	144	97	101	22	211	212	44	35	296	833	87	39
Tb927.10.12060	4482	437	245	131	117	155	126	107	162	17	26	74	22	73	55	42	67	138	172	80	39
Tb927.10.12240	984	202	235	37	38	772	309	230	136	324	237	56	22	119	101	36	25	352	789	226	126
Tb927.10.12600	1788	366	335	70	61	823	399	154	177	255	173	80	22	191	163	26	14	305	638	82	34
Tb927.10.12700	1137	464	288	360	217	248	242	285	405	99	82	35	22	53	46	59	244	239	209	90	44
Tb927.10.1310	2835	440	407	81	86	687	555	172	207	202	192	97	22	163	97	22	35	353	348	66	36
Tb927.10.13380	2142	399	396	58	72	388	208	62	91	128	105	102	22	177	169	56	39	312	614	68	37
Tb927.10.14340	3522	426	202	70	75	133	173	78	112	34	32	74	22	90	65	24	68	174	203	56	32
Tb927.10.2780	4593	1024	689	190	198	189	141	82	174	42	34	76	22	96	67	34	62	295	324	58	40
Tb927.10.6290	1539	549	414	54	38	511	234	66	105	194	131	78	22	394	349	66	55	523	866	70	40
Tb927.10.7230	7566	2216	911	1293	648	301	222	100	274	52	62	69	22	140	108	100	575	471	428	152	82
Tb927.10.7300	288	236	232	148	150	607	239	828	1223	148	134	70	22	98	102	113	121	98	310	122	53
Tb927.10.7540	2949	262	182	107	79	124	125	79	146	34	34	80	22	50	37	27	40	147	161	56	28
Tb927.2.5270	12791	2640	1071	1509	683	284	212	135	266	46	40	97	22	236	169	150	692	695	820	261	106
Tb927.3.1130	1768	375	336	95	69	743	329	180	282	173	130	88	22	245	201	45	33	359	448	60	38
Tb927.3.1290	3188	349	150	72	50	276	193	64	80	97	87	35	22	178	124	47	72	316	407	60	27
Tb927.3.2810	5028	599	381	134	141	419	253	114	212	120	91	65	22	171	114	34	55	287	340	83	52
Tb927.3.3540	1573	371	359	56	57	1616	600	243	222	569	420	143	22	371	313	18	19	610	1176	81	55
Tb927.3.4570	2436	901	947	210	171	1553	731	360	355	413	358	122	22	288	182	41	37	504	630	50	50
Tb927.3.800	901	276	288	48	63	451	193	136	211	149	85	92	22	119	96	26	33	186	601	159	74
Tb927.4.2470	4069	683	404	167	119	311	196	120	211	59	48	103	22	146	100	36	36	398	385	95	49
Tb927.4.2880	6287	995	368	401	226	129	144	79	184	35	40	69	22	115	73	54	146	281	255	93	46
Tb927.4.5110	1325	357	297	207	167	318	140	132	511	63	40	79	22	141	210	156	125	168	343	172	120
Tb927.4.800	8035	1157	697	600	411	192	142	105	274	28	18	96	22	136	84	81	122	366	480	187	97
Tb927.5.1150	3357	622	386	89	87	955	359	241	277	212	216	121	22	198	175	59	40	232	630	118	51
Tb927.5.1740	456	85	144	25	73	410	196	361	421	84	68	41	22	67	102	82	68	110	513	174	49
Tb927.5.2100	1499	433	381	89	89	955	438	548	766	306	263	97	22	332	214	68	53	489	785	139	58
Tb927.5.2600	2824	425	165	65	57	300	198	77	136	78	67	64	22	89	44	24	27	195	237	56	23
Tb927.5.2800	3144	635	573	129	139	349	443	143	167	102	131	75	22	123	67	19	43	297	305	33	45
Tb927.5.3080	1063	240	71	94	24	297	145	85	106	104	123	60	22	184	160	54	56	220	389	72	37
Tb927.5.3090	441	233	144	70	51	460	185	167	228	132	104	140	22	218	263	185	91	195	883	329	162
Tb927.6.1450	850	117	79	29	17	218	56	95	73	86	59	86	22	81	100	29	15	104	558	62	47
Tb927.6.1950	2679	613	488	85	84	548	289	66	124	167	137	63	22	213	139	32	36	445	511	36	29
Tb927.6.2140	1497	167	226	67	90	806	235	414	401	137	81	174	22	184	175	90	48	183	766	161	80
Tb927.6.2280	558	434	345	50	42	394	212	75	101	102	67	94	22	230	226	103	48	252	696	174	94
Tb927.6.2660	3376	589	453	114	125	786	385	124	198	143	96	137	22	187	142	60	35	372	793	121	48
Tb927.6.3150	13566	2003	719	1082	597	311	138	107	213	24	18	44	22	110	114	88	296	363	600	141	59
Tb927.6.4370	1611	1149	580	426	220	523	227	107	353	142	60	95	22	515	445	269	255	397	769	262	132
Tb927.6.4680	1035	279	346	57	80	173	65	25	61	68	43	74	22	139	143	39	17	205	564	65	25
Tb927.7.1090	5560	799	403	336	221	287	168	170	308	58	56	79	22	114	114	73	206	198	371	116	74
Tb927.7.1430	1882	385	507	90	99	737	220	111	305	161	92	205	22	359	427	171	87	465	1451	252	128
Tb927.7.1460	2923	478	285	67	73	225	161	59	110	83	35	81	22	290	171	36	31	511	736	82	53
Tb927.7.3240	530	176	118	30	20	881	338	569	540	204	114	154	22	316	369	99	47	347	962	202	160
Tb927.7.3270	2462	311	215	102	81	549	248	168	270	97	71	111	22	98	65	27	51	257	314	44	42
Tb927.7.3640	1808	320	223	256	184	554	283	759	908	132	105	140	22	163	126	118	91	243	327	170	85
Tb927.7.5280	6656	736	507	261	169	244	216	92	155	57	54	60	22	121	72	45	101	296	283	91	55
Tb927.7.6460	2636	496	339	110	95	259	138	60	143	93	55	134	22	216	143	56	71	346	425	120	66
Tb927.8.1050	7962	1428	850	556	363	243	198	136	298	52	45	118	22	170	99	89	192	409	494	151	63
Tb927.8.1440	490	154	117	39	20	227	97	56	105	61	51	52	22	94	112	98	83	110	371	131	76
Tb927.8.1590	13694	1575	601	906	518	380	254	149	317	49	44	64	22	210	179	151	1321	604	450	161	108
Tb927.8.1780	3711	347	260	112	112	490	256	296	444	72	76	53	22	88	80	51	127	160	180	67	45
Tb927.8.2640	3546	1884	1319	1393	875	481	372	225	1041	68	52	68	22	210	140	163	554	460	562	245	115
Tb927.8.3620	1951	901	732	451	326	866	351	211	514	156	94	120	22	325	327	408	414	635	1067	497	240
Tb927.8.4220	789	492	329	297	194	347	126	188	803	70	48	49	22	172	186	237	258	220	729	302	141
Tb927.8.4610	671	221	216	38	28	814	315	382	395	313	199	75	22	274	362	186	121	369	1124	379	177
Tb927.8.6290	1319	281	299	28	45	1269	388	276	252	228	173	96	22	151	149	22	21	254	640	97	58
Tb927.8.690	395	124	147	94	72	482	236	582	737	64	66	68	22	61	73	79	49	93	456	302	99
Tb927.8.7770	3095	252	225	90	88	464	219	183	276	126	62	165	22	142	90	29	26	254	317	76	44
Tb09.160.3830	1384	309	253	33	49	832	250	95	156	217	122	99	21	140	136	24	8	255	593	42	22
Tb09.211.0090	1626	258	219	34	48	460	185	50	98	143	102	93	21	158	124	23	11	285	424	41	18
Tb09.211.0780	339	77	99	15	19	193	102	88	74	112	94	56	21	44	41	8	6	83	230	24	8
Tb09.211.3050	682	181	195	132	137	517	142	341	573	114	97	77	21	56	83	59	40	104	372	175	65
Tb09.244.2070	831	284	321	42	46	822	328	131	130	173	156	73	21	204	204	59	40	199	732	59	48
Tb09.244.2780	2374	463	305	137	113	529	404	215	258	242	216	84	21	208	155	111	164	353	446	136	66
Tb11.01.0620	1184	206	164	26	31	647	319	100	100	242	194	66	21	259	263	56	32	260	835	64	16
Tb11.01.0910	2637	674	687	103	97	866	532	258	372	179	144	65	21	154	106	18	32	347	434	63	37
Tb11.01.0950	1754	451	276	51	38	392	192	68	98	162	106	75	21	160	119	13	17	157	258	40	23
Tb11.01.1710	2394	558	592	45	69	1140	449	68	128	300	257	85	21	359	299	36	37	579	1109	70	47
Tb11.01.2020	1425	239	162	46	35	275	173	64	101	152	92	51	21	144	133	63	57	223	373	41	46
Tb11.01.4640	1683	251	168	57	41	390	279	110	128	115	107	69	21	86	63	25	26	239	236	46	34
Tb11.01.5850	3186	504	428	80	74	323	161	59	129	99	73	55	21	74	35	14	30	147	200	24	14
Tb11.01.5915	568	124	165	67	54	355	194	439	515	93	90	58	21	59	44	46	50	62	234	95	47
Tb11.01.6700	1132	70	52	20	22	304	109	92	80	84	63	160	21	76	72	29	19	77	326	42	27
Tb11.01.7010	5053	1761	1143	734	476	548	284	179	631	101	54	141	21	250	180	122	242	411	509	179	101
Tb11.01.7260	1991	234	214	40	58	496	244	104	137	173	116	86	21	111	93	24	10	239	517	63	39
Tb11.02.0490	1426	225	191	26	30	605	189	55	75	190	138	72	21	119	110	19	11	222	385	31	24
Tb11.02.2070	1998	200	148	37	41	220	185	44	46	102	86	53	21	72	67	12	21	206	186	27	11
Tb11.02.2300	5429	1150	1071	369	376	675	313	205	473	151	116	95	21	205	118	80	82	355	645	135	81
Tb11.02.2820	3159	543	413	90	113	668	317	105	223	151	99	104	21	168	128	51	40	426	523	85	57
Tb11.02.4280	4169	1065	768	547	388	179	201	127	332	41	51	86	21	133	100	79	188	406	346	154	86
Tb11.02.4610	1729	242	221	39	40	800	356	87	97	201	172	128	21	113	94	15	18	252	555	36	34
Tb11.03.0080	2925	731	617	388	351	611	357	526	953	96	72	114	21	135	137	162	287	392	805	361	130
Tb11.47.0029	1916	374	359	50	54	854	383	153	133	302	231	95	21	212	226	46	31	368	850	84	41
Tb927.1.1100	4086	542	398	119	101	581	268	342	413	174	103	96	21	180	188	95	64	324	920	238	142
Tb927.1.2740	1834	300	84	33	54	396	163	79	87	145	79	62	21	120	107	23	26	201	375	45	19
Tb927.1.2810	279	66	41	14	14	65	32	17	20	92	76	50	21	50	27	13	6	46	129	21	7
Tb927.1.3820	432	241	330	112	134	893	320	666	552	104	77	94	21	394	512	530	278	222	1409	494	244
Tb927.1.3880	5725	449	248	169	140	87	123	85	131	36	41	60	21	85	38	30	112	181	155	60	42
Tb927.10.11210	1416	285	171	39	35	362	204	103	92	181	116	77	21	155	97	21	23	289	286	47	29
Tb927.10.1160	447	107	85	25	18	526	196	123	126	185	105	71	21	180	232	112	56	187	590	109	85
Tb927.10.13020	2748	531	801	76	125	424	194	161	207	34	22	146	21	81	107	55	56	164	465	88	39
Tb927.10.1320	2148	308	234	59	54	125	81	50	71	56	32	89	21	144	96	32	21	213	337	40	27
Tb927.10.1370	852	131	149	26	27	685	282	127	98	195	183	92	21	147	119	9	7	269	557	39	20
Tb927.10.13800	972	135	55	86	36	102	193	111	131	45	34	34	21	50	39	25	78	101	74	32	19
Tb927.10.13970	894	279	305	66	61	965	351	247	220	309	226	135	21	310	336	115	67	266	1081	233	137
Tb927.10.14490	1263	1083	295	686	193	502	357	333	779	60	60	47	21	123	151	125	180	291	494	145	78
Tb927.10.14920	3723	1032	558	529	285	258	282	173	265	66	76	77	21	90	71	33	71	246	214	47	37
Tb927.10.15450	1449	211	140	35	38	285	111	49	83	80	54	55	21	91	101	28	13	216	318	51	24
Tb927.10.15850	1188	251	224	81	83	459	247	197	219	83	99	63	21	115	79	49	74	237	200	69	54
Tb927.10.16150	1734	333	269	34	43	669	350	91	116	314	257	54	21	255	196	36	43	423	590	71	42
Tb927.10.4140	222	89	178	26	58	638	195	572	440	73	71	112	21	140	135	148	85	196	681	383	202
Tb927.10.4900	1500	620	480	256	235	329	187	142	766	71	61	61	21	202	220	148	172	263	637	235	85
Tb927.10.5240	5109	724	289	223	177	177	158	104	226	28	28	81	21	108	103	51	166	249	281	97	67
Tb927.10.5350	12429	4665	3559	2254	1688	379	163	142	420	43	21	95	21	216	184	125	322	552	1030	217	111
Tb927.10.6090	2067	388	126	62	43	574	320	56	90	192	170	30	21	140	107	14	25	374	429	29	22
Tb927.10.6410	2994	455	350	201	158	168	166	104	235	24	20	52	21	50	60	34	134	164	223	58	30
Tb927.10.9380	1644	271	115	55	45	637	269	100	143	184	121	85	21	248	285	63	52	348	895	82	32
Tb927.2.1800	3348	1088	795	239	211	691	321	165	407	189	123	104	21	367	227	101	158	769	902	222	105
Tb927.2.2720	4506	398	255	158	130	186	203	132	163	45	37	58	21	72	41	42	81	189	204	63	32
Tb927.2.4530	761	190	168	26	29	545	177	137	168	176	141	73	21	273	359	219	134	326	865	242	108
Tb927.2.4720	2289	236	148	65	50	380	186	102	123	128	88	109	21	235	180	25	24	245	537	86	36
Tb927.3.2770	3422	535	425	86	113	705	444	169	218	205	168	74	21	214	128	28	32	560	513	57	44
Tb927.3.3040	954	258	218	74	54	379	258	178	214	110	59	26	21	83	96	82	91	220	356	148	75
Tb927.3.3410	3173	825	936	482	500	1002	428	279	840	121	80	112	21	290	325	282	291	403	1065	408	219
Tb927.3.4930	2013	165	135	39	64	384	166	169	159	110	67	89	21	72	70	11	9	120	449	50	35
Tb927.4.2100	2157	152	104	56	78	167	80	117	176	28	24	101	21	46	37	30	37	82	142	84	43
Tb927.4.2510	5448	598	431	137	172	272	207	89	159	73	61	110	21	102	95	49	61	302	373	83	52
Tb927.4.5020	5494	1783	815	515	353	225	251	155	299	31	25	69	21	118	84	57	178	447	399	89	53
Tb927.5.1880	596	350	93	103	36	449	223	235	325	130	96	67	21	161	165	109	89	256	678	286	187
Tb927.6.2240	1278	147	66	19	25	250	131	44	52	130	105	51	21	94	110	21	20	160	333	49	35
Tb927.6.3500	6765	1907	1389	851	610	295	134	96	325	21	9	82	21	333	319	272	974	573	1176	298	97
Tb927.6.4320	1390	367	276	248	150	396	220	303	707	100	81	88	21	194	207	220	213	250	517	306	184
Tb927.6.4340	386	156	142	23	25	301	187	99	129	152	129	93	21	168	171	30	23	201	680	99	60
Tb927.6.630	2204	545	332	95	75	422	194	72	135	52	42	61	21	141	108	26	43	153	271	52	12
Tb927.7.2190	976	964	617	1291	568	562	360	489	2277	87	39	101	21	182	261	346	392	244	583	297	177
Tb927.7.2240	1857	1465	1184	1509	977	465	204	233	1236	44	31	94	21	134	152	131	244	269	522	221	122
Tb927.7.3550	4093	925	297	926	356	121	108	71	174	13	14	35	21	94	95	122	1456	215	257	141	77
Tb927.7.3570	2293	447	266	42	49	810	318	79	122	167	107	76	21	206	150	25	17	473	705	40	31
Tb927.7.4050	2464	455	435	81	87	842	257	297	449	246	98	169	21	200	173	56	17	457	840	155	120
Tb927.7.5590	4967	506	258	183	129	130	88	61	138	34	16	52	21	100	67	44	85	163	255	71	39
Tb927.7.7110	2704	576	489	106	123	636	319	163	260	150	97	126	21	137	113	59	49	233	409	104	67
Tb927.8.2410	714	135	125	40	17	686	236	348	419	157	117	133	21	69	61	2	4	128	372	62	25
Tb927.8.3230	1870	426	393	81	80	621	300	152	208	184	210	79	21	98	46	16	27	324	299	56	31
Tb927.8.3560	3036	888	482	533	241	255	178	137	344	55	48	66	21	121	60	64	117	175	222	109	48
Tb927.8.4800	1330	365	363	59	47	628	225	126	252	264	178	146	21	365	340	57	18	600	1339	157	96
Tb927.8.5090	5635	971	562	398	243	199	131	98	332	41	28	74	21	128	96	70	95	232	334	120	56
Tb927.8.5280	816	359	383	93	83	988	381	445	413	367	257	83	21	268	249	86	70	397	753	150	92
Tb927.8.7040	620	205	132	27	24	392	192	145	163	155	120	51	21	136	167	96	78	244	823	296	195
Tb927.8.8030	1055	350	245	185	160	660	319	757	893	98	99	40	21	100	106	108	133	143	257	101	53
Tb927.8.890	1256	960	950	1066	1009	2363	1465	2203	3981	70	49	59	21	165	271	298	689	194	892	278	119
Tb09.160.0360	2235	359	541	76	93	1620	588	408	468	313	247	173	20	355	458	109	69	421	1951	212	116
Tb09.160.0620	924	184	182	46	51	583	277	375	355	106	83	158	20	223	189	114	56	272	725	197	140
Tb09.160.0850	1844	253	196	27	44	652	253	207	198	296	228	127	20	165	150	36	18	215	779	69	37
Tb09.160.2230	707	115	89	14	10	585	209	42	52	148	102	66	20	163	165	21	16	225	599	36	28
Tb09.160.3510	1138	270	329	46	61	892	309	182	182	202	150	113	20	273	250	68	29	406	961	128	98
Tb09.160.4150	548	229	461	69	140	847	411	393	436	158	111	102	20	221	294	126	77	276	1318	325	141
Tb09.160.4270	440	127	111	22	20	341	133	46	49	106	70	35	20	112	161	60	41	125	483	79	44
Tb09.160.4760	4578	400	258	148	105	639	431	185	219	190	109	78	20	208	202	152	491	334	577	159	97
Tb09.160.4910	1788	405	355	61	81	674	264	324	351	130	81	128	20	134	69	23	28	335	352	65	50
Tb09.160.5060	1151	525	325	156	119	442	187	175	378	143	72	64	20	204	212	172	160	345	553	223	144
Tb09.160.5100	728	196	220	56	56	450	205	118	133	145	90	112	20	272	288	164	108	252	940	266	184
Tb09.211.0310	580	299	341	96	99	616	235	251	268	153	105	56	20	146	151	153	145	217	817	402	173
Tb09.211.0790	959	205	187	25	27	788	277	141	103	183	182	64	20	127	142	30	16	178	563	41	36
Tb09.211.2150	1969	1759	569	2242	657	857	1288	1009	2441	39	45	26	20	99	91	126	930	352	203	143	96
Tb09.211.2680	2007	132	59	32	32	339	178	59	86	102	101	69	20	85	74	19	8	173	240	40	25
Tb09.211.4530	360	46	42	18	16	188	74	80	88	192	178	40	20	63	75	21	23	64	254	60	12
Tb09.211.4900	806	200	220	29	46	365	123	45	55	116	78	62	20	210	173	27	19	195	613	34	19
Tb09.244.2750	1353	176	183	30	23	448	227	115	179	129	126	61	20	63	64	15	12	83	142	27	17
Tb11.01.0670	1665	195	129	35	41	420	184	92	129	137	115	105	20	112	76	24	17	220	345	39	27
Tb11.01.1250	1061	225	297	33	45	704	276	67	72	296	197	79	20	207	220	42	25	324	1040	85	40
Tb11.01.1540	3263	758	717	116	118	689	417	142	253	134	122	103	20	151	98	31	34	377	373	83	35
Tb11.01.1670	1126	578	666	206	232	554	216	239	882	72	46	66	20	205	292	192	161	275	849	232	125
Tb11.01.2420	2765	539	420	87	87	329	288	91	134	122	95	77	20	160	99	41	54	389	380	53	29
Tb11.01.3780	1299	79	45	13	9	125	65	31	34	79	62	72	20	20	22	5	6	39	62	16	4
Tb11.01.4410	914	137	126	40	27	344	148	121	171	108	64	52	20	104	66	15	30	184	263	39	37
Tb11.01.5070	718	251	210	41	30	572	190	104	123	158	134	81	20	294	383	133	76	316	883	225	96
Tb11.01.5380	1693	224	228	27	37	317	162	111	130	96	74	137	20	169	165	55	43	206	574	89	38
Tb11.01.6690	1442	466	473	76	81	814	288	128	219	230	123	130	20	236	278	55	28	465	1390	253	155
Tb11.01.6720	1961	331	462	83	107	867	342	190	255	259	178	137	20	191	201	67	36	270	1075	202	116
Tb11.01.6870	937	262	191	73	46	493	168	115	216	163	95	102	20	312	295	128	81	336	919	188	135
Tb11.01.8400	1982	529	631	111	78	883	430	185	182	151	99	71	20	366	410	177	162	495	809	141	76
Tb11.02.0380	3548	455	287	216	112	459	543	229	279	71	58	74	20	84	57	44	169	189	285	63	27
Tb11.02.0840	760	197	123	19	17	590	295	79	60	220	203	86	20	325	313	107	66	419	1113	100	85
Tb11.02.1030	1047	157	101	26	12	641	286	73	97	234	167	71	20	203	240	15	13	264	667	37	23
Tb11.02.1070	2702	1355	1655	528	543	1197	546	356	1064	144	86	86	20	605	546	642	1042	893	1436	521	208
Tb11.02.1220	1338	620	672	102	105	1351	460	286	463	388	234	144	20	499	543	266	178	637	1878	611	255
Tb11.02.1510	4090	413	242	118	80	265	175	123	190	92	82	81	20	116	112	44	40	208	428	63	37
Tb11.02.1720	3726	822	729	159	150	373	167	117	249	95	53	162	20	321	241	51	45	380	681	109	52
Tb11.02.4150	2815	279	187	165	143	124	138	81	127	34	34	50	20	56	35	32	88	143	139	65	41
Tb11.02.4660	2926	540	248	93	73	129	147	68	128	52	34	69	20	62	34	26	39	208	207	34	16
Tb11.02.4940	1087	217	248	60	57	616	264	420	397	241	201	178	20	345	355	167	84	312	1258	280	165
Tb11.22.0011	3984	180	128	52	62	151	68	84	115	59	78	58	20	47	48	34	34	71	174	66	35
Tb11.42.0003	1846	1994	1823	1584	1239	613	250	241	1383	68	35	77	20	523	661	620	704	498	1423	623	310
Tb11.47.0007	2583	788	553	311	230	445	240	86	281	56	23	34	20	205	174	136	199	261	585	89	64
Tb11.47.0022	609	291	248	48	37	559	264	217	220	196	145	56	20	192	259	172	133	280	603	205	107
Tb11.55.0011	647	135	113	36	34	569	170	166	161	109	133	71	20	147	189	76	50	213	816	264	182
Tb927.1.1930	9385	1292	442	469	266	212	123	99	183	20	22	40	20	127	125	78	234	381	429	116	55
Tb927.1.2980	4612	687	714	218	238	383	238	184	331	67	52	178	20	159	104	59	84	291	432	154	70
Tb927.1.3940	3099	328	167	100	53	211	181	78	144	49	60	42	20	89	66	25	44	309	184	59	44
Tb927.1.3950	1676	296	72	178	57	212	329	144	126	39	49	19	20	90	49	86	399	465	285	193	114
Tb927.1.4470	1516	251	155	30	23	639	276	113	134	252	210	78	20	220	158	13	11	336	499	33	16
Tb927.10.11110	2322	422	280	99	98	348	248	123	228	54	41	70	20	51	30	26	32	217	180	78	32
Tb927.10.13070	3756	544	360	210	166	158	176	108	238	35	32	66	20	44	46	37	73	185	164	75	43
Tb927.10.13680	2091	353	282	64	69	454	278	146	158	187	166	94	20	78	61	22	19	264	262	46	36
Tb927.10.13870	1305	329	344	50	62	610	345	100	182	129	96	48	20	140	97	23	27	313	427	55	40
Tb927.10.1980	2121	533	464	74	65	462	221	59	97	102	44	78	20	275	272	64	64	329	682	43	34
Tb927.10.2770	1149	374	182	224	103	162	94	65	182	44	26	38	20	128	105	86	123	127	224	97	39
Tb927.10.5830	1641	445	394	61	48	844	360	222	282	234	173	57	20	157	140	33	20	333	609	56	31
Tb927.10.6190	1630	403	509	38	46	814	339	92	94	385	276	100	20	238	222	48	38	296	621	63	35
Tb927.10.7020	1308	269	259	24	20	874	425	230	324	239	132	74	20	137	126	39	35	404	801	312	125
Tb927.10.7130	2241	292	253	58	60	314	189	47	82	110	67	114	20	89	60	19	15	237	241	38	22
Tb927.10.9130	2070	514	478	74	59	552	263	61	119	125	90	65	20	120	106	22	24	204	348	49	20
Tb927.10.9150	903	252	357	38	46	947	372	275	329	221	141	95	20	189	185	36	24	357	904	127	92
Tb927.2.3190	1445	113	121	25	25	534	208	153	178	152	98	106	20	90	127	14	13	118	554	59	43
Tb927.2.3390	2460	521	658	88	112	1109	329	163	271	148	102	96	20	213	181	37	32	355	712	108	55
Tb927.2.4130	2495	657	562	82	86	717	318	146	265	202	120	88	20	313	280	114	117	566	973	110	63
Tb927.3.1220	1865	348	226	66	64	1172	528	292	300	310	245	83	20	322	249	76	49	560	987	132	106
Tb927.3.1840	957	565	231	459	260	766	426	698	1634	68	52	48	20	134	175	242	395	260	528	220	117
Tb927.3.2310	975	247	66	139	49	111	74	35	84	24	16	46	20	195	252	213	163	249	811	339	182
Tb927.3.3130	5124	1748	687	633	321	323	374	184	386	89	68	92	20	184	132	58	205	646	561	159	87
Tb927.3.3440	2897	291	451	109	144	715	242	140	307	141	103	142	20	129	172	66	64	194	728	138	79
Tb927.3.4430	1861	294	257	47	47	257	207	75	136	87	62	60	20	70	28	19	25	166	122	31	14
Tb927.3.4810	1566	178	155	22	25	503	180	209	199	195	172	96	20	210	238	9	16	263	845	52	38
Tb927.3.5500	1087	364	458	29	51	1606	650	293	201	523	391	126	20	335	392	66	37	523	2209	252	159
Tb927.3.920	3810	425	296	127	110	223	182	107	212	71	47	92	20	101	83	40	48	237	266	72	46
Tb927.4.2900	3531	339	192	67	60	356	201	122	159	90	84	78	20	106	82	40	66	194	354	80	32
Tb927.4.3670	1542	354	328	28	36	562	221	61	108	176	113	83	20	171	105	13	17	232	333	21	20
Tb927.5.1750	1705	298	192	53	45	741	402	93	116	327	270	71	20	137	77	16	8	268	337	34	26
Tb927.5.2810	1538	213	139	29	38	451	184	78	94	159	119	88	20	144	176	22	9	192	563	37	27
Tb927.5.3320	4583	962	806	295	292	469	404	337	416	101	116	104	20	141	113	83	215	369	406	163	64
Tb927.5.3440	1285	130	140	51	49	289	108	72	99	58	43	77	20	56	69	26	12	86	212	52	37
Tb927.5.650	4521	189	88	92	63	193	101	227	218	86	67	150	20	114	136	53	47	126	459	118	86
Tb927.6.2860	1772	399	199	42	56	849	389	264	373	115	80	36	20	93	112	119	114	427	787	285	157
Tb927.7.1030	3364	703	565	95	118	369	212	119	198	167	129	105	20	165	133	50	65	368	618	94	51
Tb927.7.1520	331	57	78	6	10	151	74	65	40	56	51	41	20	44	62	23	21	68	206	48	31
Tb927.7.1550	1628	327	55	51	26	378	207	50	78	152	79	51	20	135	140	15	13	243	456	43	19
Tb927.7.210	1687	277	435	138	183	1090	371	414	627	112	72	53	20	216	258	289	239	310	938	342	169
Tb927.7.3000	5312	772	373	214	124	232	112	93	198	42	42	89	20	70	50	37	66	164	271	75	28
Tb927.7.3490	2473	409	385	78	65	548	318	128	171	125	71	77	20	165	77	50	76	336	354	66	31
Tb927.7.4860	1023	280	285	177	154	197	139	128	310	44	29	42	20	57	47	42	64	142	162	61	35
Tb927.7.5680	955	158	158	43	44	752	268	471	493	172	134	100	20	126	109	35	25	307	745	208	89
Tb927.8.1130	4937	363	303	139	136	152	136	105	175	12	11	79	20	76	49	63	56	148	215	84	47
Tb927.8.2580	3342	796	556	136	99	396	241	98	224	100	69	73	20	161	105	38	43	298	417	65	34
Tb927.8.2890	2183	224	166	32	48	475	200	231	212	96	66	128	20	146	155	45	29	228	553	87	64
Tb927.8.2960	1920	343	149	48	30	359	183	64	90	134	122	67	20	178	135	27	20	338	596	45	37
Tb927.8.3060	2179	538	446	487	320	244	255	216	345	79	100	60	20	107	94	71	160	233	287	143	52
Tb927.8.3350	4033	580	491	106	121	663	334	159	229	111	77	101	20	268	177	48	34	475	754	78	55
Tb927.8.4580	1695	351	82	170	59	94	83	46	136	68	35	24	20	178	181	137	200	208	408	148	65
Tb927.8.6000	1427	1284	558	559	280	1758	984	1010	1431	263	213	86	20	753	545	643	782	1141	1758	840	333
Tb927.8.6060	1406	632	779	490	397	999	546	573	974	94	73	86	20	161	200	271	320	430	1145	629	371
Tb927.8.7830	3635	481	238	108	91	336	233	152	286	39	29	133	20	94	78	39	48	146	186	68	42
Tb927.8.8050	2316	517	399	85	67	817	386	120	150	251	214	61	20	220	133	43	43	424	539	54	36
Tb09.160.1020	2472	553	520	95	75	316	184	90	155	118	68	75	19	157	104	38	34	377	427	65	37
Tb09.160.1710	1152	237	130	30	17	549	266	95	114	228	240	60	19	194	221	31	18	298	810	57	30
Tb09.160.2170	368	163	89	41	22	234	88	86	93	161	104	84	19	176	153	47	41	200	759	261	158
Tb09.160.2380	340	161	127	61	42	420	121	166	144	100	61	46	19	146	132	127	83	149	349	175	92
Tb09.160.2460	2214	380	421	70	95	620	319	99	168	188	147	153	19	218	150	24	20	336	557	58	41
Tb09.160.2770	2322	930	499	393	233	668	419	262	588	152	123	46	19	132	113	53	95	356	433	139	63
Tb09.160.3380	2691	426	169	77	65	287	171	69	85	103	83	86	19	146	72	21	30	308	467	66	40
Tb09.160.3740	386	121	175	54	55	402	178	228	347	77	54	80	19	138	138	109	61	179	613	210	121
Tb09.160.3760	2913	340	303	69	55	178	159	76	110	82	78	54	19	127	81	36	68	303	260	64	45
Tb09.160.4680	2993	428	288	71	74	194	155	84	135	100	72	64	19	96	96	24	43	219	268	45	26
Tb09.160.5130	1614	221	161	36	34	575	235	158	164	162	97	81	19	70	104	33	25	211	493	153	99
Tb09.211.0760	813	188	218	41	34	628	239	161	178	174	103	86	19	94	122	22	14	126	531	94	57
Tb09.211.1190	2369	266	202	43	57	269	226	94	133	59	29	66	19	82	47	42	55	168	253	47	35
Tb09.211.1320	4373	686	408	130	110	456	327	112	157	131	80	97	19	212	170	57	66	395	649	106	72
Tb09.211.1620	4662	1793	1467	631	485	438	302	145	495	96	50	110	19	254	188	136	339	399	472	172	85
Tb09.211.1810	450	137	178	71	63	652	225	541	623	198	168	230	19	125	127	34	21	149	549	144	86
Tb09.211.2850	824	139	185	28	46	589	237	202	183	212	130	92	19	73	58	19	9	127	405	61	42
Tb09.211.3730	3438	500	322	76	77	256	125	48	116	47	33	83	19	130	77	33	19	223	314	47	37
Tb09.211.4440	6126	912	776	256	309	215	147	99	280	40	37	63	19	109	82	76	170	407	494	128	75
Tb09.244.2660	4204	931	475	384	207	731	736	365	614	60	57	53	19	147	129	95	415	333	189	84	42
Tb09.v2.0050	324	75	88	30	45	348	129	256	328	45	26	71	19	38	48	10	14	53	277	91	47
Tb11.01.0800	1257	278	236	33	45	681	248	79	101	268	157	79	19	191	241	27	15	249	644	40	38
Tb11.01.0940	1743	311	148	43	50	270	105	45	62	81	66	61	19	90	69	17	17	150	249	34	22
Tb11.01.0960	3166	1248	1053	533	449	554	445	205	639	85	84	83	19	248	140	120	313	513	483	199	97
Tb11.01.1510	1448	331	320	39	56	806	304	65	110	259	180	101	19	459	412	104	77	610	1118	174	93
Tb11.01.1780	1129	261	215	28	31	733	248	79	65	277	196	71	19	266	287	27	14	384	1010	55	66
Tb11.01.3000	1185	453	556	198	229	508	205	149	455	78	36	83	19	182	194	191	170	305	842	268	133
Tb11.01.3720	1637	383	350	142	84	158	131	90	155	33	18	78	19	66	55	37	57	204	179	58	38
Tb11.01.4290	2352	195	124	22	38	288	119	86	93	109	78	73	19	146	155	20	27	174	436	57	29
Tb11.01.4340	1181	236	242	32	38	650	296	287	342	171	108	94	19	109	76	51	36	229	360	84	61
Tb11.01.4350	2536	385	201	63	82	213	154	62	101	49	28	64	19	88	61	21	26	219	245	51	17
Tb11.01.4720	1373	122	76	26	15	461	167	91	90	106	63	61	19	66	73	9	7	133	297	21	18
Tb11.01.6170	4418	1050	923	190	221	499	400	119	264	99	123	93	19	178	115	32	76	552	554	83	56
Tb11.01.6280	3351	373	226	104	72	135	113	84	112	35	28	104	19	73	38	29	43	136	180	40	24
Tb11.01.6550	10427	1358	790	609	439	189	112	115	238	22	20	61	19	103	90	76	175	349	492	133	65
Tb11.01.7080	3006	576	452	115	101	305	248	110	208	93	86	109	19	100	59	30	37	316	256	59	35
Tb11.01.7310	1706	383	306	144	98	345	120	94	136	114	103	68	19	83	63	13	21	164	223	52	22
Tb11.01.7930	1821	273	137	44	52	543	269	135	141	183	111	97	19	88	100	17	19	237	486	49	35
Tb11.01.8760	2099	312	185	58	50	520	303	155	201	148	138	73	19	121	66	21	16	262	267	34	44
Tb11.02.0680	657	120	137	19	22	485	193	104	75	194	139	114	19	95	98	12	10	177	675	118	58
Tb11.02.0900	3171	530	501	72	95	606	429	144	191	123	87	76	19	118	82	28	40	308	401	44	25
Tb11.02.1930	6591	1036	503	258	207	224	152	74	164	62	53	83	19	133	86	59	125	450	532	86	54
Tb11.02.2120	1371	164	99	30	23	436	251	76	113	146	143	60	19	87	57	14	10	269	226	28	19
Tb11.02.2130	1310	377	296	78	64	283	109	30	67	75	51	75	19	149	186	68	46	242	530	89	51
Tb11.02.2510	1737	1028	760	470	391	762	418	321	580	123	94	53	19	743	596	861	889	688	733	417	241
Tb11.02.3340	1725	268	273	46	43	678	222	85	103	241	198	77	19	129	129	19	13	269	590	38	39
Tb11.02.3530	3890	777	692	134	132	399	195	106	229	55	30	92	19	149	126	50	40	331	536	103	47
Tb11.02.3880	5124	675	449	191	157	144	166	94	120	30	33	48	19	98	68	43	139	246	296	50	33
Tb11.02.4580	1851	151	73	26	32	278	173	71	70	94	87	59	19	62	41	6	10	100	91	23	11
Tb11.12.0004	1746	362	306	62	48	497	242	73	131	123	76	93	19	161	116	25	25	292	482	61	37
Tb11.18.0010	1390	193	180	27	37	506	247	68	101	203	139	74	19	125	90	18	11	210	421	22	16
Tb11.22.0008	1518	151	118	30	19	244	183	38	59	117	91	24	19	149	118	47	44	235	270	52	24
Tb11.47.0004	3424	1846	1515	1352	946	429	396	175	580	63	47	51	19	250	183	282	802	711	746	474	186
Tb927.1.1880	4332	747	403	143	128	190	121	65	112	46	27	80	19	113	69	45	68	272	352	62	31
Tb927.1.3050	1805	469	243	75	45	451	222	117	151	166	86	42	19	103	91	20	20	191	230	34	19
Tb927.1.3260	5798	1019	541	312	209	271	227	130	226	55	74	89	19	271	147	80	270	427	394	95	74
Tb927.1.3800	619	65	51	11	17	119	75	54	56	47	26	74	19	61	69	22	23	53	177	35	29
Tb927.10.10130	1638	376	358	41	62	1109	347	129	190	266	165	106	19	199	188	18	8	340	900	49	27
Tb927.10.12200	678	127	143	14	22	231	97	25	54	58	44	34	19	105	83	25	19	126	412	48	39
Tb927.10.12460	444	162	86	35	24	363	162	175	229	125	77	111	19	221	275	92	64	215	777	164	87
Tb927.10.12980	2421	629	749	82	119	863	446	152	262	121	81	67	19	232	164	56	53	439	562	79	32
Tb927.10.13200	2787	297	154	59	46	384	293	66	90	106	108	67	19	84	75	29	22	256	280	44	20
Tb927.10.14030	1350	714	752	330	431	703	511	376	1256	60	48	77	19	241	343	450	597	350	1095	516	307
Tb927.10.14360	978	323	375	85	58	436	193	162	488	68	51	76	19	93	68	32	37	182	304	95	84
Tb927.10.15890	1254	116	55	27	13	246	138	78	73	129	88	41	19	101	89	8	8	160	292	48	37
Tb927.10.2820	1491	140	133	31	37	482	206	77	68	186	171	56	19	100	73	14	14	218	411	18	17
Tb927.10.2960	2307	485	337	65	75	532	268	94	104	196	116	86	19	155	92	22	26	346	345	44	20
Tb927.10.3490	1884	460	373	141	124	422	192	89	210	97	56	58	19	75	59	36	36	297	337	92	57
Tb927.10.3510	5409	567	307	198	166	217	168	79	236	64	31	114	19	140	124	53	64	259	361	103	50
Tb927.10.7370	2157	228	197	52	56	699	272	148	162	240	200	136	19	125	97	21	14	323	601	68	46
Tb927.10.7630	2826	554	849	80	156	616	222	116	225	121	54	193	19	317	381	87	44	479	1633	194	70
Tb927.10.8010	735	150	131	17	27	483	184	68	59	176	121	107	19	132	119	12	5	177	501	20	22
Tb927.10.8360	1530	232	282	42	72	278	114	108	142	55	30	108	19	65	76	49	30	105	353	76	42
Tb927.10.9370	1035	125	66	21	17	180	146	49	44	80	57	31	19	73	77	15	16	158	400	59	39
Tb927.10.9770	2355	584	602	72	84	1425	638	122	160	301	169	93	19	278	265	32	36	597	988	74	42
Tb927.2.3370	1893	309	471	168	214	566	193	275	358	75	60	53	19	112	146	145	145	131	405	91	61
Tb927.2.4200	3114	252	127	81	105	141	98	67	150	19	10	43	19	39	27	34	53	76	81	63	31
Tb927.2.4950	4327	393	201	78	50	248	268	94	118	71	94	61	19	103	52	18	40	236	208	48	38
Tb927.2.5210	756	153	147	26	27	241	136	97	114	107	77	69	19	99	65	10	11	143	245	28	20
Tb927.2.5830	998	41	38	15	11	53	54	11	11	69	69	35	19	70	73	6	7	143	314	20	21
Tb927.3.1180	2713	417	336	89	94	485	299	101	148	98	90	72	19	136	77	31	28	279	298	48	34
Tb927.3.1190	7150	988	573	241	211	245	164	84	146	42	28	48	19	112	100	48	136	338	447	87	42
Tb927.3.1320	3474	864	465	204	162	312	157	72	164	44	28	67	19	140	89	52	94	368	390	65	33
Tb927.3.3070	2797	476	351	86	75	288	162	74	122	55	36	46	19	93	55	19	18	197	249	45	27
Tb927.3.4640	1087	213	251	128	162	487	242	332	300	122	97	55	19	132	123	174	197	275	440	173	75
Tb927.3.5620	3140	1280	1143	632	490	610	412	223	1058	91	45	63	19	195	146	117	160	385	692	224	98
Tb927.4.1130	498	144	105	30	24	428	191	250	239	208	176	112	19	117	115	43	22	231	386	85	56
Tb927.4.1610	1387	270	277	71	70	489	315	184	262	154	106	73	19	78	85	35	30	199	431	102	27
Tb927.4.1990	2015	233	116	48	45	246	183	104	163	44	30	46	19	39	38	17	20	146	207	50	23
Tb927.4.2080	2762	1586	1314	1160	1016	336	214	179	739	40	34	81	19	135	198	222	647	129	403	106	39
Tb927.4.3390	2217	376	182	53	45	867	398	183	187	314	221	93	19	228	172	20	20	430	781	72	46
Tb927.4.420	7638	1752	1187	438	419	230	114	124	305	44	17	73	19	144	69	76	115	364	517	155	80
Tb927.4.4560	3268	513	369	167	139	281	313	212	287	66	79	90	19	125	66	57	76	339	256	85	47
Tb927.5.1650	2591	319	191	124	84	223	134	94	144	19	16	121	19	70	77	70	71	127	205	69	31
Tb927.5.1870	2664	573	397	55	65	913	647	134	179	250	239	55	19	210	148	30	32	473	565	81	33
Tb927.5.2860	1409	359	304	71	57	779	398	252	246	218	169	71	19	173	168	53	36	361	559	102	38
Tb927.5.3780	1301	311	428	44	66	588	232	103	164	111	65	60	19	120	135	29	25	164	462	78	27
Tb927.5.4510	443	46	43	18	26	196	72	225	202	77	51	107	19	61	75	39	36	43	399	85	49
Tb927.6.1170	1437	370	368	44	59	1125	506	184	183	537	464	114	19	253	278	46	17	354	978	71	42
Tb927.6.2130	1295	273	296	46	95	625	253	223	268	96	70	118	19	224	313	109	67	242	1026	114	77
Tb927.6.2420	750	573	593	401	325	484	246	323	744	93	52	66	19	208	186	215	188	244	547	336	149
Tb927.6.4480	3044	1806	1501	995	688	426	362	165	533	95	87	89	19	275	199	110	396	559	442	203	81
Tb927.6.4620	612	91	140	18	16	725	244	165	123	196	141	87	19	228	225	59	42	206	989	100	81
Tb927.6.4640	3528	602	485	125	124	916	424	233	334	296	221	139	19	387	287	93	87	597	1029	105	65
Tb927.7.1370	1824	249	335	54	49	244	124	62	69	35	24	72	19	111	91	30	19	91	291	48	21
Tb927.7.1570	4495	629	586	148	170	461	233	109	190	88	51	102	19	128	97	38	47	358	446	58	44
Tb927.7.1910	2985	1037	904	142	183	776	355	128	311	107	68	79	19	231	196	68	57	476	934	186	90
Tb927.7.2790	2125	465	331	95	86	471	341	83	151	92	85	47	19	176	146	42	57	282	515	72	32
Tb927.7.3320	1216	107	74	29	27	335	128	134	114	123	70	53	19	104	112	39	31	122	553	66	58
Tb927.7.5500	3556	636	422	138	98	398	229	125	221	59	40	98	19	81	56	29	33	180	215	61	28
Tb927.7.6740	3096	396	285	97	87	192	171	108	203	53	56	107	19	96	48	26	33	98	106	43	23
Tb927.7.6840	547	176	145	81	85	438	169	247	356	90	82	97	19	94	97	37	31	125	543	156	61
Tb927.7.7130	2809	692	546	131	108	646	401	222	357	130	98	72	19	168	148	84	77	270	373	80	53
Tb927.7.990	3554	239	161	53	59	270	131	80	120	73	63	65	19	85	71	28	42	160	237	49	23
Tb927.8.2040	768	102	69	16	17	213	100	67	70	49	45	67	19	39	16	7	4	71	102	11	8
Tb927.8.4370	3398	182	111	63	54	315	218	150	192	50	31	60	19	76	62	30	35	129	220	59	29
Tb927.8.4590	743	327	182	67	36	541	220	193	284	202	134	96	19	275	247	105	76	286	826	231	110
Tb927.8.4810	875	358	526	130	125	809	375	373	481	201	139	132	19	253	292	144	109	234	759	236	117
Tb927.8.840	3261	331	200	111	70	230	160	94	134	66	48	59	19	189	128	100	146	262	424	71	44
Tb09.160.1060	1602	429	266	46	50	804	342	270	245	222	194	68	18	137	150	34	35	248	571	101	43
Tb09.160.1740	1287	325	301	30	51	601	253	79	102	190	131	91	18	190	206	23	20	319	706	58	29
Tb09.160.1950	1154	322	383	38	55	456	215	76	111	146	102	92	18	232	305	105	70	306	1042	111	69
Tb09.160.2290	4242	378	208	169	123	125	111	56	138	44	40	64	18	110	71	58	108	200	258	88	39
Tb09.160.2420	903	281	181	26	29	531	250	63	53	138	104	38	18	321	351	230	149	241	702	171	82
Tb09.160.3210	1580	250	136	70	54	323	204	98	165	98	64	85	18	82	56	15	16	238	327	69	39
Tb09.160.3520	1188	285	287	51	72	617	312	179	198	227	184	70	18	209	151	34	26	306	567	80	42
Tb09.211.1340	291	73	48	55	28	107	32	75	88	44	19	69	18	28	30	16	16	34	106	33	15
Tb09.211.1550	1679	604	455	473	385	180	107	85	228	29	19	59	18	63	43	19	78	101	153	74	29
Tb09.211.1630	2466	419	397	58	71	391	205	54	129	85	65	51	18	138	96	44	27	315	494	61	32
Tb09.211.3530	1766	212	231	48	53	137	46	72	142	41	17	109	18	64	52	32	18	71	190	46	29
Tb09.211.4210	5739	1517	1310	589	636	305	171	144	439	29	15	49	18	169	142	157	461	334	517	138	68
Tb09.211.4800	2508	306	308	59	81	495	365	107	123	129	127	69	18	113	77	24	25	333	302	55	36
Tb09.244.2570	3378	2162	1394	1542	1038	883	741	560	1191	49	34	26	18	103	66	107	441	316	356	119	35
Tb11.01.0360	2244	465	289	82	72	564	231	112	253	174	111	55	18	291	319	224	195	387	1036	327	159
Tb11.01.0490	1647	855	679	172	135	609	304	106	247	120	71	35	18	170	170	54	67	233	333	64	33
Tb11.01.1070	2407	420	254	59	53	568	246	130	193	200	117	140	18	201	201	55	43	296	789	126	59
Tb11.01.1650	1749	326	140	89	57	286	226	139	178	91	45	78	18	123	85	51	77	282	313	60	33
Tb11.01.2190	533	99	61	16	11	174	84	24	25	92	66	63	18	112	121	8	7	109	328	13	13
Tb11.01.2490	2987	780	344	151	141	612	287	173	420	115	77	104	18	169	93	41	53	588	728	139	75
Tb11.01.3860	480	83	84	61	53	532	197	548	509	141	71	166	18	250	264	167	96	182	852	295	200
Tb11.01.4130	2740	384	270	111	100	190	206	86	152	31	33	55	18	77	40	39	86	193	189	37	27
Tb11.01.4140	3007	475	363	105	97	224	134	42	110	55	26	82	18	109	97	44	45	117	226	66	37
Tb11.01.7330	3086	640	505	103	105	534	322	88	153	160	124	79	18	153	93	24	37	468	328	75	36
Tb11.01.7490	6095	784	470	186	190	608	296	312	339	126	100	152	18	180	153	89	97	270	611	128	77
Tb11.01.7530	1155	543	716	472	369	516	290	250	589	44	23	36	18	84	107	123	150	190	422	156	80
Tb11.01.7760	3722	301	166	74	71	115	170	106	137	38	37	62	18	71	39	22	53	157	168	53	24
Tb11.01.8200	1275	125	121	35	29	257	138	86	136	139	100	61	18	157	155	72	59	137	453	188	89
Tb11.01.8230	3207	479	362	90	83	286	234	121	169	113	91	62	18	116	82	34	57	266	301	51	41
Tb11.01.8290	2432	318	197	70	65	842	424	208	209	266	208	83	18	219	211	72	50	359	923	171	104
Tb11.01.8330	3629	560	592	94	127	1173	504	269	322	265	195	82	18	284	271	145	117	511	897	125	91
Tb11.02.0800	4513	555	207	184	84	100	63	75	133	12	5	50	18	68	58	23	75	161	203	47	29
Tb11.02.1960	279	8	17	4	10	151	62	127	160	68	49	66	18	18	26	4	13	31	133	23	8
Tb11.02.3890	1511	270	311	38	57	833	345	189	204	255	180	109	18	149	111	16	20	350	863	123	80
Tb11.02.4190	1422	366	194	89	72	310	148	88	294	57	43	63	18	120	170	65	63	191	733	213	84
Tb11.02.4200	826	110	61	9	11	298	184	32	32	136	95	46	18	109	101	12	10	218	454	29	39
Tb11.02.4600	1980	367	354	43	61	679	319	104	128	126	73	103	18	129	66	13	5	242	326	24	15
Tb11.02.4880	1295	266	281	48	53	653	244	127	144	266	155	86	18	164	126	19	16	233	754	94	48
Tb11.02.5190	4459	1299	819	1357	800	271	500	142	374	42	36	70	18	255	224	151	819	533	415	214	89
Tb11.02.5380	2919	705	475	78	96	359	196	73	104	81	67	82	18	148	72	24	47	337	300	32	28
Tb11.02.5390	3292	667	288	115	76	400	266	81	118	58	75	55	18	143	80	26	31	310	330	74	42
Tb11.02.5570	2364	754	530	424	256	771	577	501	1164	124	94	51	18	145	122	62	142	272	452	99	50
Tb11.02.5660	1401	511	346	90	78	412	197	100	165	146	103	73	18	142	165	41	35	212	450	101	34
Tb11.03.0160	1977	310	282	43	61	1034	460	101	117	396	365	99	18	161	114	19	11	342	429	36	32
Tb11.03.0470	1071	232	176	25	19	608	235	80	74	243	154	70	18	271	299	83	51	289	801	62	66
Tb11.50.0004	2133	374	255	45	64	506	274	133	141	176	127	80	18	229	123	29	18	369	528	49	34
Tb927.1.3030	1251	312	205	116	67	477	263	332	579	104	70	52	18	125	127	81	81	250	383	133	74
Tb927.1.4450	3504	558	564	140	130	381	279	151	250	92	97	118	18	124	81	36	50	248	318	86	52
Tb927.1.880	13784	1585	988	837	639	225	124	107	324	24	30	96	18	208	136	154	294	321	494	246	123
Tb927.10.10680	2982	302	211	86	61	245	233	125	164	80	107	59	18	76	39	15	29	195	159	36	16
Tb927.10.11090	2055	339	266	95	102	312	185	74	128	41	23	74	18	42	31	10	34	137	141	23	21
Tb927.10.11150	681	359	221	206	142	320	208	369	445	77	55	36	18	37	42	32	50	104	127	83	25
Tb927.10.11530	306	152	140	14	14	592	260	266	245	210	170	105	18	185	172	40	24	178	653	112	46
Tb927.10.11920	468	65	70	13	15	494	187	266	308	123	65	104	18	67	96	26	8	176	809	147	77
Tb927.10.12250	2379	407	409	46	47	872	507	112	161	257	284	87	18	142	93	16	11	384	450	39	22
Tb927.10.12450	618	115	142	14	25	560	248	86	82	260	174	50	18	138	165	25	15	184	540	41	25
Tb927.10.12470	1584	275	231	54	58	567	302	118	124	145	100	91	18	120	95	16	26	289	372	48	25
Tb927.10.12990	891	336	283	47	49	463	232	158	222	217	115	118	18	230	229	66	40	314	873	180	95
Tb927.10.13160	1593	286	310	34	59	440	194	70	117	98	69	107	18	80	77	13	12	170	335	56	38
Tb927.10.13250	5733	852	384	265	160	198	220	128	244	39	38	89	18	119	95	46	175	359	435	85	66
Tb927.10.13590	2868	544	379	133	125	236	148	60	154	59	40	59	18	105	123	58	52	264	338	106	40
Tb927.10.13840	1029	237	212	35	46	602	313	158	154	147	111	77	18	173	137	71	91	298	520	159	93
Tb927.10.13960	1770	514	282	77	68	324	152	55	110	72	31	53	18	269	265	89	57	332	806	93	56
Tb927.10.14320	3402	511	378	126	96	248	249	74	153	82	59	55	18	122	69	49	92	315	259	52	35
Tb927.10.14520	1401	358	226	100	54	671	350	194	307	162	141	54	18	152	125	51	58	256	356	58	46
Tb927.10.14660	1176	215	76	26	24	629	261	189	258	193	124	75	18	199	186	29	16	285	726	69	51
Tb927.10.15020	3288	660	396	198	121	496	301	140	293	75	41	59	18	131	86	42	67	262	328	67	28
Tb927.10.1510	6981	1984	738	1606	660	251	270	94	287	30	30	25	18	221	217	215	2267	423	304	75	45
Tb927.10.15540	2508	887	1116	148	181	813	337	147	399	133	83	59	18	174	144	54	56	446	669	120	61
Tb927.10.1720	1791	243	232	24	48	378	178	59	98	82	60	60	18	78	93	18	8	110	240	32	19
Tb927.10.2030	1842	392	460	60	70	817	347	97	129	266	238	80	18	352	305	49	41	443	920	59	39
Tb927.10.2130	2730	553	387	51	63	464	199	58	96	92	67	55	18	284	186	70	105	427	610	55	37
Tb927.10.2310	1446	228	124	42	22	297	96	44	61	106	66	57	18	122	143	20	9	109	262	35	21
Tb927.10.2430	3729	508	424	154	131	261	145	116	211	41	41	88	18	66	61	32	42	130	189	65	31
Tb927.10.2510	1578	380	456	24	48	720	313	67	80	228	135	91	18	287	331	43	29	361	1141	76	34
Tb927.10.3040	408	98	146	43	43	804	281	565	495	204	130	126	18	148	139	100	58	371	1401	563	300
Tb927.10.5900	1404	505	291	118	83	859	488	355	490	226	214	46	18	217	222	73	62	400	754	194	102
Tb927.10.6100	1506	235	166	35	48	551	283	87	96	170	140	74	18	150	157	20	10	331	551	53	34
Tb927.10.6160	2196	482	462	70	89	454	179	37	90	122	93	45	18	261	242	40	22	454	733	54	36
Tb927.10.7280	3189	442	138	54	44	219	156	49	79	76	57	39	18	130	77	24	30	331	275	62	34
Tb927.10.7310	2670	323	223	36	38	546	308	99	116	142	86	66	18	162	143	31	26	354	579	48	30
Tb927.10.7970	1101	229	305	35	58	912	363	98	96	262	278	109	18	252	209	51	38	451	879	117	76
Tb927.10.9000	4926	1324	1276	281	290	603	332	132	400	108	61	146	18	310	180	91	94	633	875	139	96
Tb927.2.5030	2157	309	155	62	45	139	78	34	78	43	19	35	18	181	153	85	109	234	282	64	41
Tb927.2.5280	2704	578	523	355	284	381	250	178	357	169	126	73	18	181	134	97	158	357	460	127	80
Tb927.2.5890	1441	199	71	33	24	303	161	76	103	94	76	52	18	162	103	24	19	196	362	40	29
Tb927.3.1250	320	73	133	42	21	360	123	90	65	87	72	72	18	127	134	43	24	98	327	50	31
Tb927.3.3030	1282	500	145	187	67	337	175	121	212	81	83	58	18	95	82	43	78	134	260	92	37
Tb927.3.3490	976	817	415	780	384	483	320	344	1124	81	46	39	18	203	213	300	444	262	652	365	205
Tb927.3.4280	2380	356	210	65	45	676	284	162	173	167	112	77	18	289	210	110	112	321	432	76	56
Tb927.4.1290	637	97	95	28	26	289	126	87	122	89	94	83	18	35	33	12	15	107	262	52	36
Tb927.4.3170	3358	371	391	67	105	290	105	67	144	46	37	47	18	62	60	25	25	117	283	42	36
Tb927.4.3410	2371	397	363	99	114	422	347	212	233	176	187	77	18	100	61	25	34	206	174	42	26
Tb927.4.3530	2360	370	309	55	49	528	288	144	223	97	52	86	18	82	52	26	23	209	353	50	31
Tb927.4.4090	997	181	184	21	21	424	163	41	54	98	76	75	18	89	98	8	13	125	435	16	15
Tb927.4.4900	2351	401	121	167	62	379	193	178	322	69	52	51	18	142	132	173	219	220	413	70	49
Tb927.5.2150	2319	458	613	77	156	532	202	188	287	104	53	125	18	163	203	102	66	198	646	146	73
Tb927.5.3140	940	201	144	36	43	707	229	322	459	177	96	111	18	152	125	25	15	284	692	138	90
Tb927.5.3830	1149	394	362	213	158	245	135	109	229	67	42	38	18	139	158	102	82	121	397	127	58
Tb927.5.4050	326	107	98	17	20	448	168	183	108	169	159	105	18	201	239	117	78	212	741	212	130
Tb927.5.670	2889	270	201	59	75	219	94	86	150	25	22	61	18	65	69	41	41	127	306	62	24
Tb927.6.1880	1744	606	413	46	35	709	278	54	109	286	174	99	18	461	453	135	114	716	1350	396	191
Tb927.6.2730	5535	655	474	153	155	342	197	102	201	48	37	58	18	107	78	39	64	253	398	71	45
Tb927.6.4700	1610	272	156	38	35	481	167	85	131	174	164	75	18	149	143	31	20	239	569	51	35
Tb927.6.710	745	143	100	13	13	297	141	49	46	105	81	55	18	98	91	15	10	182	322	26	15
Tb927.7.1310	4225	757	351	221	173	370	156	89	276	46	31	88	18	138	88	68	97	321	489	88	57
Tb927.7.1420	4958	1378	1017	856	554	342	338	203	656	43	35	84	18	117	98	79	212	369	449	130	63
Tb927.7.2540	1399	312	162	55	42	323	180	141	249	112	65	71	18	103	165	59	58	187	571	202	74
Tb927.7.3070	1727	594	340	243	175	397	265	203	454	53	45	23	18	99	76	56	106	191	270	114	35
Tb927.7.3630	3122	510	387	254	152	502	330	263	665	80	49	67	18	95	71	48	241	189	267	82	42
Tb927.7.3710	1600	187	177	31	32	377	181	58	73	87	91	53	18	105	110	25	14	137	430	47	17
Tb927.7.3820	2091	319	284	50	61	595	265	78	118	236	168	90	18	211	205	29	13	372	774	64	40
Tb927.7.4810	1459	319	196	70	63	458	165	97	206	90	60	51	18	146	179	75	61	214	506	107	49
Tb927.7.4990	2241	363	317	54	50	484	308	99	138	110	101	69	18	195	207	41	35	322	488	49	18
Tb927.7.5110	1793	305	202	66	78	452	236	147	163	144	129	77	18	93	54	26	20	223	260	59	32
Tb927.7.5150	4365	738	489	171	157	611	504	156	266	131	110	97	18	211	148	55	56	537	521	91	52
Tb927.7.5390	4432	520	404	156	184	208	82	68	163	40	19	130	18	206	143	63	36	209	512	148	72
Tb927.7.6750	2432	264	153	57	51	204	165	65	78	84	81	62	18	115	65	21	31	137	104	13	13
Tb927.7.6770	443	162	148	107	90	348	182	419	601	51	31	43	18	44	43	53	56	41	101	61	25
Tb927.7.7260	3924	496	291	83	85	228	213	127	203	66	55	74	18	80	57	17	30	184	191	50	31
Tb927.7.7360	1380	473	345	161	95	406	275	236	284	209	176	71	18	162	131	92	158	379	411	162	97
Tb927.8.1310	1904	269	204	35	41	724	255	165	174	184	156	123	18	176	161	41	33	342	731	81	56
Tb927.8.1580	1753	200	123	30	43	523	255	209	200	178	155	60	18	73	77	47	23	160	346	73	52
Tb927.8.1720	1983	248	227	65	47	263	189	107	130	97	72	77	18	92	51	26	44	171	186	47	33
Tb927.8.2150	546	212	171	81	38	184	94	73	173	85	51	60	18	80	93	42	47	132	315	129	58
Tb927.8.2510	748	135	130	41	28	467	180	190	226	147	84	81	18	108	99	23	15	173	460	70	45
Tb927.8.2570	1531	411	427	90	103	424	222	187	250	211	127	61	18	120	77	35	67	160	239	62	35
Tb927.8.2660	5760	672	327	202	144	161	127	87	157	41	30	53	18	86	55	35	74	163	183	45	38
Tb927.8.3940	1701	136	49	38	28	273	192	73	70	80	74	35	18	55	28	9	5	112	144	27	28
Tb927.8.4940	1881	430	515	69	82	787	289	103	227	140	113	132	18	217	219	111	80	396	711	104	66
Tb927.8.6660	2048	1012	535	923	373	232	165	75	356	48	32	43	18	132	102	116	384	290	331	124	76
Tb927.8.700	3811	520	502	115	103	444	206	316	337	85	51	114	18	175	141	40	35	302	536	104	50
Tb927.8.7170	1201	185	219	21	28	588	242	142	166	232	168	99	18	133	125	37	39	412	892	278	141
Tb927.8.7360	3024	605	604	135	166	396	196	81	252	75	37	88	18	153	115	44	47	260	476	95	48
Tb927.8.830	5137	259	167	83	85	128	98	77	113	19	19	76	18	54	47	33	50	99	205	69	37
Tb09.160.0630	2196	353	294	45	54	398	181	77	129	147	117	53	17	132	89	25	33	168	253	40	18
Tb09.160.0720	1959	207	104	68	39	255	179	93	169	76	50	39	17	156	171	120	135	211	347	87	51
Tb09.160.1790	1701	371	379	74	83	482	187	66	130	121	81	95	17	234	217	19	20	333	542	49	26
Tb09.160.2500	147	95	59	20	16	173	53	36	67	122	69	37	17	93	113	18	8	140	367	96	39
Tb09.160.3930	904	269	201	38	30	506	205	72	140	214	140	115	17	317	256	61	37	380	1135	125	102
Tb09.160.4430	1297	205	149	58	49	595	311	319	441	164	91	60	17	84	62	43	55	251	503	161	73
Tb09.160.4750	2001	428	386	68	45	804	358	108	182	243	156	97	17	137	79	26	17	288	371	41	37
Tb09.160.4830	3700	308	322	77	127	1008	350	339	336	132	111	61	17	114	123	53	33	147	375	57	42
Tb09.160.4850	1473	317	346	47	56	496	252	150	181	157	101	93	17	104	117	36	36	254	439	137	54
Tb09.160.5670	4182	1397	842	238	187	324	196	92	216	71	45	86	17	233	158	116	323	578	619	109	52
Tb09.211.1070	3145	578	141	472	120	130	150	121	227	22	10	67	17	64	73	49	178	160	194	110	43
Tb09.211.1940	607	215	173	52	50	301	105	82	140	52	28	48	17	65	68	41	34	85	197	44	33
Tb09.211.2750	836	222	322	79	89	798	301	355	406	110	76	43	17	111	112	67	54	185	421	71	53
Tb09.211.2870	2294	132	160	40	35	399	205	113	130	134	100	81	17	87	61	23	20	136	267	45	20
Tb09.211.4110	2094	439	430	70	67	605	340	139	159	221	155	68	17	119	119	13	14	203	369	50	23
Tb09.211.4600	1505	328	219	44	56	533	303	88	101	217	159	58	17	387	273	43	33	463	720	58	28
Tb11.01.0150	1942	296	314	58	65	473	216	67	131	83	41	63	17	94	91	24	6	182	486	52	25
Tb11.01.0400	4067	582	355	135	138	123	120	67	128	36	35	64	17	132	91	32	73	302	335	72	34
Tb11.01.0610	1671	354	352	56	72	411	210	54	106	109	81	80	17	180	128	37	23	293	344	59	29
Tb11.01.1130	1608	157	97	44	26	166	93	49	74	38	26	55	17	79	72	25	50	173	213	53	25
Tb11.01.1230	1117	105	28	18	24	346	161	42	59	130	107	37	17	188	177	45	60	261	613	65	50
Tb11.01.1300	1709	288	162	79	47	270	146	60	149	119	91	84	17	180	174	101	59	226	363	138	54
Tb11.01.1440	1162	245	77	13	10	533	231	66	76	202	192	51	17	198	206	27	11	399	889	37	39
Tb11.01.2500	3823	703	629	177	139	414	393	219	344	67	45	89	17	96	70	31	48	347	350	55	45
Tb11.01.2886	525	144	115	44	27	285	175	232	209	113	66	60	17	64	96	30	26	80	275	46	27
Tb11.01.3630	1922	200	132	137	73	188	154	140	196	70	54	88	17	76	46	31	71	119	166	52	36
Tb11.01.3690	3471	811	720	116	100	311	290	109	174	65	88	79	17	171	111	29	51	406	358	68	39
Tb11.01.4030	1037	268	88	219	90	268	165	143	288	56	42	31	17	73	68	104	231	194	239	112	49
Tb11.01.4590	1076	235	206	55	42	571	239	215	256	162	134	112	17	165	118	25	18	184	561	60	36
Tb11.01.4630	3418	783	476	127	112	336	365	131	208	89	109	67	17	132	82	41	50	385	354	60	26
Tb11.01.4680	1086	192	158	35	22	319	170	51	68	161	129	38	17	142	95	11	9	148	272	18	12
Tb11.01.4940	4078	1068	686	435	270	178	194	99	220	31	34	64	17	120	82	66	203	286	240	84	45
Tb11.01.5760	1885	342	320	44	43	1214	520	149	157	478	303	139	17	317	290	28	25	504	1388	74	59
Tb11.01.5910	1952	811	440	509	237	207	120	65	331	56	30	44	17	204	258	237	287	330	377	201	108
Tb11.01.6390	3021	375	468	68	76	767	252	128	167	127	57	88	17	156	138	20	20	285	757	67	45
Tb11.01.6880	1124	479	439	202	176	823	386	673	914	142	132	58	17	133	187	203	192	171	529	245	105
Tb11.01.7580	3009	661	350	97	100	335	214	84	140	152	99	101	17	184	108	27	18	257	247	51	29
Tb11.01.8190	3562	487	337	151	136	590	302	329	358	106	82	114	17	88	87	57	74	179	558	141	64
Tb11.01.8610	2663	519	313	83	66	318	223	51	111	156	136	64	17	189	103	25	48	416	418	49	32
Tb11.02.1290	1020	383	321	30	32	903	404	100	112	302	170	56	17	260	273	71	69	396	1110	113	72
Tb11.02.1390	2409	373	236	53	54	317	194	36	79	95	90	48	17	98	69	19	22	109	178	52	14
Tb11.02.2270	330	69	50	13	20	286	113	231	215	119	111	90	17	95	121	45	21	66	441	102	42
Tb11.02.3520	6093	1222	937	256	253	230	129	111	223	34	36	83	17	139	108	48	103	303	414	96	47
Tb11.02.3590	1598	163	173	85	111	289	118	203	437	91	47	50	17	58	75	53	64	99	265	129	53
Tb11.02.4140	1799	170	94	43	31	195	149	71	67	84	85	45	17	85	65	17	10	163	223	32	20
Tb11.02.4430	2290	274	271	40	49	329	278	92	93	180	209	56	17	102	64	16	20	192	224	30	23
Tb11.02.4535	445	79	102	6	16	481	177	134	116	104	88	41	17	146	167	96	67	153	563	168	104
Tb11.02.4550	3272	667	745	126	184	436	184	161	264	66	39	143	17	191	198	119	86	164	624	187	68
Tb11.02.5260	921	165	185	16	28	840	283	73	72	234	190	42	17	155	112	13	11	211	533	26	23
Tb11.02.5560	2386	560	354	189	150	531	324	135	269	103	62	81	17	140	122	109	163	340	486	108	66
Tb11.03.0330	2679	277	248	59	77	422	368	135	165	187	181	84	17	186	110	35	28	326	398	53	36
Tb11.03.0340	2246	301	256	44	45	619	332	70	104	219	216	78	17	282	227	92	78	428	591	66	33
Tb11.18.0017	1468	289	238	169	132	141	103	67	162	88	63	47	17	140	126	74	84	131	164	39	18
Tb11.42.0004	1174	635	941	182	273	493	216	81	270	91	75	82	17	372	445	276	170	360	1431	445	227
Tb927.1.1340	2229	231	153	32	43	367	261	57	50	147	108	43	17	87	54	14	6	222	360	35	14
Tb927.1.3270	2838	409	300	121	82	351	232	148	200	54	34	103	17	102	78	47	33	223	297	71	31
Tb927.1.4490	559	307	354	309	271	1165	461	1000	1347	120	90	42	17	70	80	59	58	73	216	38	19
Tb927.10.10840	1710	296	228	62	56	327	232	112	150	114	86	64	17	161	105	42	59	371	362	75	62
Tb927.10.12130	2352	430	262	111	86	318	128	105	193	58	26	101	17	185	159	60	60	237	441	101	76
Tb927.10.13950	699	284	298	21	23	429	208	37	48	128	79	72	17	217	243	75	39	224	618	59	33
Tb927.10.1500	2322	1293	1233	516	472	373	185	74	505	117	50	35	17	277	210	168	246	392	662	245	114
Tb927.10.15550	3522	550	379	148	120	123	121	72	163	29	39	47	17	53	31	19	49	221	178	41	24
Tb927.10.15960	693	201	210	82	67	478	198	369	467	130	103	97	17	160	162	114	77	213	466	252	119
Tb927.10.16170	924	202	161	55	30	329	196	107	167	83	55	78	17	67	50	22	20	149	163	33	32
Tb927.10.1860	1083	181	190	17	15	1077	422	94	82	348	257	53	17	321	320	54	27	469	1196	42	32
Tb927.10.1930	1944	308	240	51	48	592	259	84	97	226	152	92	17	150	119	22	29	249	427	64	28
Tb927.10.2540	690	223	220	21	20	557	261	49	59	201	157	88	17	214	273	98	57	263	648	68	52
Tb927.10.2610	1455	283	423	76	82	568	250	141	176	161	136	56	17	132	121	89	83	313	578	147	75
Tb927.10.2810	1017	350	179	208	68	371	172	145	266	70	66	61	17	137	171	125	132	211	413	172	84
Tb927.10.3230	1122	289	294	102	109	533	158	145	199	128	86	95	17	266	317	323	194	384	1369	484	271
Tb927.10.4330	1107	158	215	22	27	300	117	48	59	126	90	113	17	166	134	33	22	227	385	54	31
Tb927.10.4790	411	102	38	46	24	330	108	237	195	69	38	127	17	137	109	55	20	103	422	76	65
Tb927.10.4870	1308	129	82	35	20	164	128	83	81	105	107	35	17	44	23	6	7	71	90	27	11
Tb927.10.4890	906	284	121	88	40	300	121	143	211	95	37	83	17	134	118	102	98	193	388	149	92
Tb927.10.6360	1464	507	418	90	62	449	206	51	136	136	71	68	17	288	335	128	97	308	781	93	57
Tb927.10.6860	951	261	163	43	29	542	255	201	266	196	127	93	17	110	100	14	15	243	449	39	23
Tb927.10.8990	1257	160	120	22	22	117	67	31	60	99	68	42	17	91	83	12	8	154	362	35	26
Tb927.10.9990	686	112	135	25	20	286	111	84	141	113	70	101	17	76	56	16	6	123	363	58	25
Tb927.2.2440	1770	865	686	292	201	530	248	276	900	38	31	50	17	194	226	190	266	305	516	163	91
Tb927.2.4410	896	368	398	197	208	987	431	923	1074	79	76	80	17	85	122	143	142	188	556	169	80
Tb927.2.4480	2004	403	266	95	101	576	227	162	319	91	51	68	17	213	208	176	107	155	564	131	71
Tb927.3.1140	1370	263	147	35	38	332	151	63	86	91	57	47	17	130	87	20	17	222	349	15	18
Tb927.3.2680	1707	444	616	51	43	386	122	28	68	138	84	72	17	216	206	42	28	295	647	50	31
Tb927.3.2870	2149	483	637	72	121	1024	441	213	317	294	192	145	17	212	219	49	22	509	1301	209	104
Tb927.3.4620	4880	880	629	170	180	174	132	76	180	39	40	63	17	79	57	32	64	260	299	65	33
Tb927.4.1190	2091	325	297	53	81	526	257	162	171	124	107	80	17	214	232	106	95	182	747	209	111
Tb927.4.1250	2791	459	326	61	76	549	315	138	226	114	75	97	17	107	85	25	26	220	286	62	40
Tb927.4.1500	6516	1382	694	362	266	214	174	188	326	45	36	101	17	113	81	47	96	307	400	96	79
Tb927.4.3700	2619	370	210	44	58	385	207	46	57	157	101	29	17	273	208	47	36	451	795	55	37
Tb927.4.4150	2828	719	656	94	116	549	337	99	165	109	79	65	17	141	91	22	27	396	424	59	36
Tb927.4.4500	3605	677	390	129	105	285	300	181	229	50	64	75	17	91	65	20	45	264	219	50	42
Tb927.4.4520	3389	361	207	111	74	651	439	240	299	156	108	65	17	101	94	28	38	183	427	75	42
Tb927.4.470	722	211	96	71	54	116	76	139	250	50	56	65	17	122	76	43	72	88	116	39	30
Tb927.4.530	2384	282	231	43	60	410	193	105	153	78	56	38	17	81	86	48	56	130	321	50	32
Tb927.4.910	1414	194	181	23	32	283	131	74	112	107	76	55	17	138	133	39	33	134	375	57	33
Tb927.5.1020	2027	496	524	55	55	735	380	236	460	205	145	89	17	148	165	44	36	305	516	113	57
Tb927.5.1890	3378	646	549	181	149	352	257	167	282	93	78	84	17	88	60	37	60	260	302	49	38
Tb927.5.2010	823	195	175	245	158	277	208	478	533	32	52	119	17	60	56	61	76	73	139	114	53
Tb927.5.2140	3242	639	573	278	253	470	224	592	751	82	41	173	17	116	106	55	67	180	463	139	56
Tb927.5.2300	3431	429	189	121	68	83	46	57	89	15	8	45	17	93	77	86	136	163	192	85	45
Tb927.5.2530	4199	671	520	147	169	395	138	202	257	122	130	38	17	89	77	24	37	123	253	49	20
Tb927.5.4090	1004	215	151	23	13	634	317	70	66	210	156	60	17	148	182	23	22	261	658	53	41
Tb927.5.4100	1545	215	162	33	29	378	157	49	68	157	116	64	17	207	174	20	11	198	412	36	12
Tb927.5.4160	1149	169	109	37	29	603	228	199	235	193	182	68	17	146	145	54	33	189	623	112	64
Tb927.5.850	1399	301	123	154	56	368	219	310	504	106	78	47	17	75	46	36	43	151	180	88	44
Tb927.6.1800	1250	436	179	385	130	692	542	489	531	54	43	32	17	83	122	163	271	113	222	114	35
Tb927.6.3650	616	295	203	288	142	300	125	236	559	58	39	51	17	93	79	91	115	121	275	109	47
Tb927.6.3950	1360	300	272	130	115	435	192	237	652	47	31	31	17	37	58	28	31	71	303	133	51
Tb927.6.4740	3232	1156	976	194	200	720	387	131	311	79	62	40	17	274	206	71	87	427	674	81	47
Tb927.7.1220	4347	626	311	151	85	260	142	155	243	83	58	91	17	109	120	64	87	221	299	80	29
Tb927.7.1250	1186	807	1089	109	149	1775	704	258	279	322	214	98	17	137	116	56	44	281	1116	141	57
Tb927.7.1540	974	187	260	22	35	566	227	176	186	124	90	66	17	93	106	19	23	138	475	85	35
Tb927.7.1590	2317	309	227	196	156	142	61	61	155	34	27	57	17	51	68	70	95	67	166	51	29
Tb927.7.1660	3195	380	458	85	82	533	303	113	189	141	104	87	17	145	84	38	29	333	352	54	36
Tb927.7.1830	1178	251	124	31	30	301	204	41	56	180	165	54	17	210	185	17	16	307	645	41	29
Tb927.7.1920	2272	577	685	201	210	1274	483	420	729	149	93	92	17	196	202	119	108	296	789	204	90
Tb927.7.2100	2784	514	500	102	91	736	405	178	254	93	74	75	17	112	129	42	55	213	578	119	38
Tb927.7.2260	1193	287	231	32	31	876	330	244	206	413	318	66	17	181	175	97	89	323	943	203	127
Tb927.7.3010	3386	219	126	37	33	180	91	67	101	43	22	41	17	74	48	11	17	111	262	27	23
Tb927.7.3530	2908	515	508	55	85	875	364	156	217	189	115	109	17	314	305	109	95	468	1041	122	64
Tb927.7.4690	1925	202	134	50	35	475	251	108	121	141	96	50	17	150	116	50	59	255	405	70	42
Tb927.7.5060	2243	466	521	203	182	578	228	226	337	114	129	90	17	175	170	85	87	227	709	179	82
Tb927.7.6370	1653	192	95	33	23	400	182	83	63	156	131	63	17	154	116	11	14	310	466	35	29
Tb927.7.6620	2283	379	308	157	90	274	129	110	296	76	43	64	17	141	98	70	79	125	179	56	37
Tb927.7.6950	2602	413	276	57	48	334	190	45	111	89	70	36	17	138	100	12	16	259	419	45	22
Tb927.7.720	5379	303	191	158	106	94	54	57	91	10	16	61	17	48	30	47	77	111	154	80	49
Tb927.7.7200	7428	571	248	284	151	166	179	152	277	41	30	90	17	112	73	35	72	204	173	63	48
Tb927.7.7250	4398	793	508	264	169	290	378	161	248	41	45	78	17	123	72	30	62	349	286	61	60
Tb927.7.790	1971	244	225	45	53	358	148	84	131	81	67	64	17	68	45	22	21	195	267	41	32
Tb927.8.1080	709	218	197	49	40	392	178	118	161	179	118	64	17	289	302	129	78	349	846	231	102
Tb927.8.2350	1153	215	130	24	20	544	244	141	115	171	106	50	17	162	118	39	29	255	405	64	35
Tb927.8.2480	1008	211	155	69	41	281	107	120	199	71	38	89	17	50	63	14	17	101	256	74	47
Tb927.8.2710	2142	340	154	75	64	379	173	91	135	121	98	57	17	153	109	21	11	188	344	48	26
Tb927.8.3050	2385	205	141	91	60	262	154	86	103	116	98	39	17	93	87	34	51	138	149	53	41
Tb927.8.3170	2440	492	390	69	57	284	165	72	96	85	43	75	17	129	105	18	24	214	315	39	20
Tb927.8.3220	2892	218	90	74	50	161	166	51	64	49	37	37	17	65	75	45	86	155	149	40	34
Tb927.8.3290	5877	985	575	220	212	387	334	186	300	87	81	120	17	153	77	57	106	444	503	99	56
Tb927.8.5240	3315	832	457	188	114	819	377	186	306	175	108	120	17	292	202	82	88	541	773	93	66
Tb927.8.5400	4582	416	252	123	81	446	172	269	306	124	99	90	17	121	120	44	45	196	458	88	45
Tb927.8.5620	4291	928	765	249	197	249	198	109	223	35	40	74	17	122	65	42	64	285	321	96	54
Tb927.8.5680	2184	146	77	38	29	139	102	35	38	64	32	52	17	81	63	12	8	223	296	34	19
Tb927.8.5830	1245	160	105	36	16	217	90	33	54	115	70	91	17	194	178	67	50	224	500	72	46
Tb927.8.6360	3126	506	366	86	83	450	435	156	186	168	147	95	17	172	112	46	115	360	342	52	27
Tb927.8.770	2056	465	228	182	103	398	196	64	126	103	57	92	17	154	92	27	31	208	391	40	29
Tb927.8.7710	2154	168	220	25	44	662	324	150	174	191	127	56	17	126	131	29	22	244	764	86	70
Tb927.8.800	7960	518	381	275	254	202	132	65	133	32	18	29	17	75	98	90	425	327	520	79	43
Tb09.160.0990	2640	470	327	95	99	302	205	124	162	43	45	36	16	79	41	18	22	203	248	53	38
Tb09.160.1100	630	173	246	24	36	771	208	329	312	345	233	159	16	264	301	144	76	395	1635	507	292
Tb09.160.2020	518	140	136	22	22	517	282	197	184	145	94	87	16	122	182	67	43	201	761	185	83
Tb09.160.2090	2412	254	149	59	53	176	121	42	93	53	28	30	16	72	37	25	18	149	188	27	18
Tb09.160.2980	4447	783	498	144	131	164	102	65	121	37	36	45	16	150	99	35	73	280	288	35	32
Tb09.160.3240	4827	614	459	207	184	133	76	86	153	24	24	58	16	56	48	33	70	131	180	55	39
Tb09.160.4180	2647	848	419	129	100	669	301	161	385	150	89	47	16	164	158	57	74	422	736	176	80
Tb09.160.5660	1090	119	121	19	18	931	324	120	101	281	296	58	16	239	257	40	20	271	1150	51	40
Tb09.211.0160	2186	869	779	230	240	1219	585	346	719	144	114	64	16	190	183	127	130	355	685	156	92
[truncated: 5,557 more rows]
