# Supplementary material
Source: HighWire-hosted journal article supplement (doi:10.1101/rna.038430.113)
Supplement: Supplementary_Table_S2.xlsx [file Supplementary_Table_S2.xlsx]

## Sheet: Sheet1
Gene	gene length	Description	Category	WT HL	XRNA HL	CAF1 HL	CNOT10 HL	PAN2 HL	RRP45 HL	XRNA/WT	CAF1/WT	CNOT10/WT	PAN2/WT	RRP45/WT
Tb04.24M18.150	489	hypothetical protein, conserved	0	35.1805	15.4606	30.151	22.1291	11.3984	9.23839	0.439466	0.857037	0.629016	0.323998	0.2626
Tb06.3A7.270	3408	hypothetical protein, conserved	0	16.6284	78.9001	35.2886	17.693	10.5004	19.8739	4.74491	2.1222	1.06402	0.631474	1.19518
Tb06.3A7.960	933	hypothetical protein	0	27.9224	18.9953	240	240	240	45.1173	0.68029	8.59525	8.59525	8.59525	1.61581
Tb07.30D13.110	759	hypothetical protein, conserved (pseudogene)	pseudogene	19.4212	#N/A	46.7405	166.588	38.2556	34.1206	#N/A	2.40668	8.57767	1.96979	1.75687
Tb07.30D13.130	639	hypothetical protein, conserved (pseudogene)	pseudogene	25.6783	#N/A	36.3525	240	41.9305	240	#N/A	1.41569	9.34643	1.63292	9.34643
Tb07.30D13.160	759	hypothetical protein, conserved (pseudogene)	pseudogene	18.2844	#N/A	56.7545	240	39.8634	32.5211	#N/A	3.10398	13.1259	2.18019	1.77862
Tb07.30D13.180	744	hypothetical protein, conserved (pseudogene)	pseudogene	23.2961	#N/A	49.4002	240	43.2533	159.284	#N/A	2.12054	10.3022	1.85668	6.83738
Tb07.30D13.60	759	hypothetical protein, conserved (pseudogene)	pseudogene	18.6284	#N/A	49.3985	240	39.8289	42.4849	#N/A	2.65178	12.8835	2.13807	2.28064
Tb07.30D13.80	777	hypothetical protein, conserved (pseudogene)	pseudogene	24.2406	#N/A	36.3764	240	42.7466	191.517	#N/A	1.50064	9.90076	1.76343	7.9007
Tb08.27P2.110	999	#N/A	0	214.45	#N/A	240	240	41.2675	27.2237	#N/A	1.11914	1.11914	0.192434	0.126946
Tb08.27P2.400	1075	#N/A	ESAG pseudogene	14.7447	#N/A	240	212.132	28.5617	#N/A	#N/A	16.277	14.387	1.93708	#N/A
Tb09_snoRNA_0011	91	#N/A	SNO	99.7399	#N/A	240	240	30.4456	240	#N/A	2.40626	2.40626	0.30525	2.40626
Tb09_snoRNA_0017	97	#N/A	SNO	116.12	#N/A	185.727	#N/A	#N/A	240	#N/A	1.59944	#N/A	#N/A	2.06683
Tb09_snoRNA_0018	87	#N/A	SNO	103.182	#N/A	240	#N/A	#N/A	240	#N/A	2.32598	#N/A	#N/A	2.32598
Tb09_snoRNA_0020	91	#N/A	SNO	99.7399	#N/A	240	240	30.4456	240	#N/A	2.40626	2.40626	0.30525	2.40626
Tb09_snoRNA_0026	97	#N/A	SNO	115.105	#N/A	145.005	#N/A	#N/A	240	#N/A	1.25977	#N/A	#N/A	2.08505
Tb09_snoRNA_0027	87	#N/A	SNO	103.182	#N/A	240	#N/A	#N/A	240	#N/A	2.32598	#N/A	#N/A	2.32598
Tb09_snoRNA_0029	91	#N/A	SNO	99.7399	#N/A	240	240	30.4456	240	#N/A	2.40626	2.40626	0.30525	2.40626
Tb09_snoRNA_0035	97	#N/A	SNO	116.12	#N/A	176.166	#N/A	#N/A	240	#N/A	1.51711	#N/A	#N/A	2.06683
Tb09_snoRNA_0036	87	#N/A	SNO	66.1085	#N/A	240	#N/A	#N/A	240	#N/A	3.6304	#N/A	#N/A	3.6304
Tb09_snoRNA_0038	91	#N/A	SNO	99.7399	#N/A	240	240	30.4456	240	#N/A	2.40626	2.40626	0.30525	2.40626
Tb09_snoRNA_0044	97	#N/A	SNO	116.12	#N/A	185.727	#N/A	#N/A	240	#N/A	1.59944	#N/A	#N/A	2.06683
Tb09_snoRNA_0045	87	#N/A	SNO	103.182	#N/A	240	#N/A	#N/A	240	#N/A	2.32598	#N/A	#N/A	2.32598
Tb09_snoRNA_0047	91	#N/A	SNO	99.7399	#N/A	240	240	30.4456	240	#N/A	2.40626	2.40626	0.30525	2.40626
Tb09_snoRNA_0053	97	#N/A	SNO	116.103	#N/A	205.461	#N/A	#N/A	240	#N/A	1.76964	#N/A	#N/A	2.06713
Tb09_snoRNA_0054	87	#N/A	SNO	103.182	#N/A	240	#N/A	#N/A	240	#N/A	2.32598	#N/A	#N/A	2.32598
Tb09_snoRNA_0056	91	#N/A	SNO	99.7399	#N/A	240	240	30.4456	240	#N/A	2.40626	2.40626	0.30525	2.40626
Tb09_snoRNA_0062	97	#N/A	SNO	115.105	#N/A	222.961	#N/A	#N/A	240	#N/A	1.93702	#N/A	#N/A	2.08505
Tb09_snoRNA_0063	87	#N/A	SNO	85.1549	#N/A	240	#N/A	#N/A	240	#N/A	2.81839	#N/A	#N/A	2.81839
Tb09_snoRNA_0065	91	#N/A	SNO	99.7399	#N/A	240	240	30.4456	240	#N/A	2.40626	2.40626	0.30525	2.40626
Tb09_snoRNA_0071	97	#N/A	SNO	116.12	#N/A	185.727	#N/A	#N/A	240	#N/A	1.59944	#N/A	#N/A	2.06683
Tb09_snoRNA_0072	87	#N/A	SNO	103.182	#N/A	240	#N/A	#N/A	240	#N/A	2.32598	#N/A	#N/A	2.32598
Tb09_snoRNA_0074	91	#N/A	SNO	70.3238	#N/A	240	240	35.7278	172.44	#N/A	3.41279	3.41279	0.508047	2.45209
Tb09_snoRNA_0080	87	#N/A	SNO	55.6582	#N/A	#N/A	#N/A	#N/A	240	#N/A	#N/A	#N/A	#N/A	4.31203
Tb09_snoRNA_0085	87	#N/A	SNO	100.114	#N/A	#N/A	#N/A	240	240	#N/A	#N/A	#N/A	2.39727	2.39727
Tb09_snoRNA_0090	87	#N/A	SNO	52.0841	#N/A	#N/A	#N/A	240	240	#N/A	#N/A	#N/A	4.60793	4.60793
Tb09_snoRNA_0094	75	#N/A	SNO	21.1629	#N/A	32.1106	240	21.8369	240	#N/A	1.51731	11.3406	1.03185	11.3406
Tb09_snoRNA_0095	73	#N/A	SNO	18.0063	#N/A	25.51	240	#N/A	165.053	#N/A	1.41672	13.3287	#N/A	9.16643
Tb09_snoRNA_0098	56	#N/A	SNO	120.538	#N/A	150.672	#N/A	240	194.662	#N/A	1.25	#N/A	1.99107	1.61494
Tb09_snoRNA_0099	66	#N/A	SNO	27.8511	#N/A	39.4321	#N/A	20.2052	240	#N/A	1.41582	#N/A	0.72547	8.61725
Tb09_snoRNA_0100	75	#N/A	SNO	21.0933	#N/A	34.2902	240	22.1218	240	#N/A	1.62565	11.378	1.04876	11.378
Tb09_snoRNA_0103	88	#N/A	SNO	27.6167	#N/A	46.6401	#N/A	#N/A	240	#N/A	1.68884	#N/A	#N/A	8.69041
Tb09_snoRNA_0104	56	#N/A	SNO	101.73	#N/A	176.398	#N/A	240	58.2817	#N/A	1.73399	#N/A	2.35919	0.572908
Tb09_snoRNA_0105	66	#N/A	SNO	32.3899	#N/A	37.6442	#N/A	20.352	240	#N/A	1.16222	#N/A	0.628342	7.40971
Tb09_snoRNA_0106	75	#N/A	SNO	21.0933	#N/A	34.2902	240	22.1218	240	#N/A	1.62565	11.378	1.04876	11.378
Tb09_snoRNA_0107	73	#N/A	SNO	18.0063	#N/A	25.51	240	#N/A	165.053	#N/A	1.41672	13.3287	#N/A	9.16643
Tb09_snoRNA_0110	56	#N/A	SNO	101.73	#N/A	176.398	#N/A	240	58.2817	#N/A	1.73399	#N/A	2.35919	0.572908
Tb09_snoRNA_0116	56	#N/A	SNO	101.73	#N/A	176.398	#N/A	240	58.2817	#N/A	1.73399	#N/A	2.35919	0.572908
Tb09_snoRNA_0118	75	#N/A	SNO	22.1131	#N/A	29.3891	#N/A	#N/A	240	#N/A	1.32904	#N/A	#N/A	10.8533
Tb09_snoRNA_0122	56	#N/A	SNO	101.73	#N/A	176.398	#N/A	240	58.2817	#N/A	1.73399	#N/A	2.35919	0.572908
Tb09_snoRNA_0125	71	#N/A	SNO	20.9263	#N/A	#N/A	184.134	#N/A	#N/A	#N/A	#N/A	8.79916	#N/A	#N/A
Tb09.142.0300	672	hypothetical protein (pseudogene)	0	28.982	#N/A	34.0754	240	32.5205	26.6137	#N/A	1.17574	8.281	1.12209	0.918284
Tb09.142.0320	342	hypothetical protein	0	29.4597	11.9427	#N/A	240	240	88.9704	0.405393	#N/A	8.14673	8.14673	3.02007
Tb09.142.0330	858	expression site-associated gene (ESAG, pseudogene), putative ,expression site-associated gene 9 (ESAG9), pseudogene	ESAG pseudogene	19.6239	#N/A	#N/A	#N/A	28.9539	#N/A	#N/A	#N/A	#N/A	1.47544	#N/A
Tb09.142.0380	354	hypothetical protein, conserved	0	24.6967	11.4999	240	#N/A	#N/A	#N/A	0.465644	9.71788	#N/A	#N/A	#N/A
Tb09.142.0390	505	hypothetical protein, conserved	0	75.6342	13.4904	240	107.295	206.808	73.901	0.178364	3.17317	1.41861	2.73432	0.977085
Tb09.142.0410	351	hypothetical protein	Membrane	95.6507	22.839	240	#N/A	240	240	0.238775	2.50913	#N/A	2.50913	2.50913
Tb09.160.0320	456	hypothetical protein, unlikely	unlikely	21.2003	#N/A	#N/A	#N/A	134.536	48.8548	#N/A	#N/A	#N/A	6.34592	2.30444
Tb09.160.0340	2454	Nucleoporin	Nucleo-cytoplasmic transport	33.2574	21.1654	240	240	95.5114	138.149	0.636413	7.21644	7.21644	2.87188	4.15393
Tb09.160.0350	1681	hypothetical protein, conserved	0	9.97932	12.7113	22.5893	26.4387	13.1092	22.2729	1.27376	2.26362	2.64935	1.31364	2.23191
Tb09.160.0360	2235	hypothetical protein, conserved	0	11.5839	12.0448	18.7945	23.3793	13.3408	10.9614	1.03979	1.62247	2.01826	1.15167	0.946258
Tb09.160.0370	1274	hypothetical protein, conserved	0	14.6812	12.1801	100.162	32.6774	13.8789	13.8001	0.829641	6.82249	2.2258	0.945353	0.939985
Tb09.160.0380	381	hypothetical protein, conserved	0	20.2367	16.9455	29.3702	208.903	31.8621	20.802	0.837364	1.45134	10.323	1.57447	1.02793
Tb09.160.0390	1371	Monooxygenase, putative	Enzyme	8.90094	15.5495	11.1969	11.2017	8.53631	8.34476	1.74695	1.25795	1.25849	0.959035	0.937515
Tb09.160.0400	1977	hypothetical protein, conserved	0	10.3619	12.5217	16.1313	22.7993	15.2863	25.0976	1.20843	1.5568	2.2003	1.47524	2.42211
Tb09.160.0410	1615	hypothetical protein, conserved	0	9.81114	11.3204	20.0695	15.238	10.0151	10.7287	1.15383	2.04558	1.55313	1.02078	1.09352
Tb09.160.0420	375	hypothetical protein, unlikely	unlikely	11.0853	#N/A	55.2061	18.9312	10.8276	10.0387	#N/A	4.98011	1.70777	0.976753	0.905591
Tb09.160.0430	2628	hypothetical protein, conserved	0	28.3694	38.7905	240	240	29.123	44.5502	1.36734	8.45983	8.45983	1.02656	1.57036
Tb09.160.0440	489	hypothetical protein, conserved	0	8.16148	13.1477	12.4322	10.7087	6.32111	7.9357	1.61095	1.52328	1.31211	0.774506	0.972335
Tb09.160.0450	1446	protein kinase, putative	Protein kinase	14.2039	24.5165	166.115	240	28.6044	21.2153	1.72603	11.695	16.8967	2.01384	1.49362
Tb09.160.0460	2289	hypothetical protein, conserved	0	11.7178	13.9025	240	84.8046	20.0848	13.5982	1.18644	20.4816	7.23722	1.71403	1.16047
Tb09.160.0465	374	hypothetical protein, conserved	0	197.122	56.4781	240	240	240	60.8358	0.286513	1.21752	1.21752	1.21752	0.30862
Tb09.160.0470	2230	hypothetical protein, conserved	0	13.6247	32.39	13.8639	30.7449	15.5913	13.9179	2.3773	1.01755	2.25655	1.14434	1.02151
Tb09.160.0480	1341	protein phosphatase 2B, putative	Protein phosphatase	13.4771	17.4987	36.9571	18.1833	9.03871	10.5361	1.2984	2.74221	1.3492	0.670671	0.781778
Tb09.160.0490	1395	hypothetical protein, conserved	0	14.5053	21.5857	240	162.461	14.0482	12.4556	1.48812	16.5457	11.2001	0.968488	0.858692
Tb09.160.0500	1477	protein kinase, putative	Protein kinase	10.2163	23.7961	31.126	35.1416	9.63526	18.5793	2.32923	3.04669	3.43976	0.943124	1.81859
Tb09.160.0520	4818	hypothetical protein, conserved	0	18.27	20.558	240	18.3204	27.7049	13.6045	1.12523	13.1363	1.00276	1.51642	0.74464
Tb09.160.0530	790	phosphatidyltransferase, putative ,phosphatidylinositol synthase, putative	Lipids & fatty acids	10.6405	16.6154	45.4633	142.331	12.8664	11.4258	1.56152	4.27266	13.3764	1.20919	1.0738
Tb09.160.0540	446	hypothetical protein, conserved	0	8.86626	#N/A	17.0253	11.1957	7.12439	11.8971	#N/A	1.92024	1.26273	0.803539	1.34184
Tb09.160.0550	1124	hypothetical protein, conserved	0	10.8991	22.7304	9.39073	18.7509	11.3766	12.6036	2.08554	0.861609	1.72042	1.04381	1.15639
Tb09.160.0560	801	hypothetical protein, conserved	0	10.7897	19.1152	16.4642	15.6318	9.36038	12.935	1.77161	1.52591	1.44877	0.867526	1.19883
Tb09.160.0570	1953	protein kinase, putative	Protein kinase	16.5137	13.0576	36.017	81.0118	25.802	70.121	0.790712	2.18104	4.90573	1.56246	4.24623
Tb09.160.0580	834	Mov34/MPN/PAD-1 metallopeptidase, putative ,metallo-peptidase, Clan MP, Family M67	Protease or peptidase	10.7591	19.4357	23.276	70.6896	10.8729	9.9894	1.80644	2.16338	6.5702	1.01058	0.928459
Tb09.160.0600	1831	hypothetical protein, conserved	0	13.0496	13.6198	44.0344	23.349	13.2343	20.1609	1.0437	3.3744	1.78926	1.01416	1.54495
Tb09.160.0610	1398	hypothetical protein, conserved	0	10.6523	18.8653	125.145	39.6457	10.3361	10.8132	1.77101	11.7481	3.7218	0.970313	1.0151
Tb09.160.0620	924	peroxisomal membrane protein 4, putative	Glycosome biogenesis	12.5418	16.0449	43.7066	240	25.2547	23.8995	1.27931	3.48487	19.136	2.01364	1.90559
Tb09.160.0630	2196	hypothetical protein, conserved	0	10.851	26.2121	22.3549	18.739	11.9021	11.1338	2.41563	2.06016	1.72693	1.09687	1.02606
Tb09.160.0650	13809	hypothetical protein, conserved	0	37.8771	43.8313	240	39.8919	21.7594	33.8743	1.1572	6.33629	1.0532	0.574473	0.894321
Tb09.160.0660	342	hypothetical protein, unlikely	unlikely	11.9152	#N/A	24.5799	13.5765	9.86907	31.6315	#N/A	2.0629	1.13943	0.828275	2.65472
Tb09.160.0670	10729	hypothetical protein, conserved	0	17.7632	47.3252	240	22.5442	18.9417	23.4681	2.66423	13.5111	1.26916	1.06635	1.32117
Tb09.160.0680	1907	sec1 family transport protein, putative	Vesicular transport	13.8626	17.5582	55.407	16.1385	10.6418	10.6819	1.26658	3.99687	1.16417	0.767664	0.770555
Tb09.160.0690	754	hypothetical protein, conserved	0	12.2316	17.9214	14.514	23.5266	21.782	16.858	1.46518	1.1866	1.92343	1.7808	1.37824
Tb09.160.0700	398	60S ribosomal protein L35, putative	Ribosome	240	41.8147	240	240	240	240	0.174228	1	1	1	1
Tb09.160.0710	737	60S ribosomal protein L35, putative	Ribosome	240	42.1068	240	240	240	240	0.175445	1	1	1	1
Tb09.160.0720	1959	hypothetical protein, conserved	0	16.8305	17.593	240	43.7029	15.9339	16.8945	1.04531	14.2599	2.59666	0.946731	1.00381
Tb09.160.0730	980	hypothetical protein, conserved	0	12.1819	13.6136	16.0144	34.9107	13.5115	10.7136	1.11753	1.31461	2.86579	1.10914	0.879473
Tb09.160.0740	564	hypothetical protein, conserved	0	11.3627	11.542	36.6562	240	13.5655	12.649	1.01577	3.22601	21.1217	1.19386	1.1132
Tb09.160.0750	3375	hypothetical protein, conserved	0	15.0157	14.7476	46.531	21.0917	17.8256	21.8197	0.982143	3.09882	1.40464	1.18713	1.45313
Tb09.160.0760	1224	hypothetical protein, conserved	Mitochondrial pathway	9.19778	12.9598	16.291	14.8669	8.5941	15.1701	1.40902	1.77119	1.61635	0.934366	1.64932
Tb09.160.0770	994	nitrilase, putative	Amino acid metabolism	36.6727	23.9358	240	240	64.3684	16.6829	0.652686	6.54437	6.54437	1.75521	0.454914
Tb09.160.0780	1932	syntaxin binding protein 1, putative	Vesicular transport	10.9736	17.1239	43.5543	14.8277	9.39481	15.5276	1.56046	3.96901	1.35122	0.856128	1.415
Tb09.160.0790	2337	hypothetical protein, conserved	0	15.2641	23.2278	37.9762	23.7447	17.4925	11.3172	1.52173	2.48793	1.55559	1.14599	0.741427
Tb09.160.0810	2341	kynureninase, putative	Amino acid metabolism	16.1673	45.1073	240	45.6372	14.9807	18.2495	2.79003	14.8447	2.8228	0.926601	1.12879
Tb09.160.0815	257	60S ribosomal protein L38, putative	Ribosome	197.044	24.5491	240	240	61.8359	240	0.124587	1.218	1.218	0.313817	1.218
Tb09.160.0830	1809	hypothetical protein, conserved	0	17.8037	17.5739	240	27.1461	17.4997	41.2952	0.987094	13.4803	1.52474	0.982923	2.31947
Tb09.160.0840	1994	membrane protein YIP1, putative	Vesicular transport	13.9802	16.0135	29.5825	38.6371	19.5368	14.2205	1.14544	2.11602	2.7637	1.39746	1.01718
Tb09.160.0850	1844	hypothetical protein, conserved	0	10.6344	14.3812	15.3621	17.4987	14.5441	10.2699	1.35233	1.44457	1.64548	1.36765	0.965724
Tb09.160.0860	3169	hypothetical protein, conserved	0	14.1266	19.9375	21.0912	40.4819	23.1029	24.2354	1.41135	1.49302	2.86565	1.63542	1.71559
Tb09.160.0890	1515	hypothetical protein, conserved	0	11.3192	28.1023	16.539	22.6443	11.7729	9.84069	2.48272	1.46115	2.00053	1.04008	0.869384
Tb09.160.0900	469	hypothetical protein, conserved	0	15.1602	14.8828	15.9178	66.5369	12.0539	10.3884	0.981698	1.04997	4.38891	0.7951	0.685237
Tb09.160.0910	965	hypothetical protein, conserved	0	9.15144	13.1829	9.77139	17.1891	8.55701	13.2616	1.44053	1.06774	1.87829	0.935045	1.44913
Tb09.160.0920	4706	hypothetical protein, conserved	0	22.5719	30.3899	61.5146	25.1442	17.0258	150.029	1.34636	2.72527	1.11396	0.75429	6.64673
Tb09.160.0930	3078	protein kinase, putative	Protein kinase	12.5244	32.9976	123.768	19.1614	13.2363	15.2011	2.63467	9.88214	1.52992	1.05684	1.21372
Tb09.160.0950	1487	hypothetical protein, conserved	0	30.6017	22.4956	240	38.8053	35.6204	9.67445	0.735111	7.8427	1.26808	1.164	0.316141
Tb09.160.0970	2235	SUMO1/Ulp2, putative	Ubiquitin & proteasome	11.06	21.6958	49.011	21.3926	15.277	11.1098	1.96165	4.43138	1.93424	1.38129	1.00451
Tb09.160.0990	2640	protein kinase, putative	Protein kinase	12.6882	20.3769	30.0108	29.272	15.6206	21.2817	1.60598	2.36526	2.30703	1.23111	1.67728
Tb09.160.1000	1379	hypothetical protein, conserved	0	9.63084	12.8169	18.927	22.8569	12.1264	7.76168	1.33082	1.96525	2.3733	1.25912	0.80592
Tb09.160.1010	1346	hypothetical protein, conserved	0	8.70835	12.9095	21.8816	27.639	11.1256	13.4914	1.48243	2.51272	3.17385	1.27758	1.54925
Tb09.160.1020	2472	hypothetical protein, conserved	0	9.7135	19.4935	23.6204	17.0791	14.1072	16.3266	2.00685	2.43171	1.75829	1.45233	1.68081
Tb09.160.1030	1618	hypothetical protein, conserved	0	10.2312	25.9157	115.785	240	27.1844	16.8683	2.533	11.3168	23.4576	2.657	1.64871
Tb09.160.1040	417	hypothetical protein, unlikely	unlikely	8.82198	#N/A	240	172.899	11.4449	12.8997	#N/A	27.2048	19.5987	1.29732	1.46222
Tb09.160.1050	363	hypothetical protein, unlikely	unlikely	9.66517	#N/A	10.9758	12.5794	14.9872	8.46852	#N/A	1.1356	1.30151	1.55064	0.876189
Tb09.160.1060	1602	hypothetical protein, conserved	0	10.1998	18.1649	20.5035	26.2239	14.4851	9.50715	1.78091	2.01019	2.57103	1.42014	0.932094
Tb09.160.1070	1155	hypothetical protein, conserved	0	13.4043	11.7096	51.5553	92.8918	11.4357	15.4788	0.873571	3.84617	6.92999	0.853136	1.15476
Tb09.160.1090	3847	serine/threonine protein kinase, putative	Protein kinase	13.8139	20.1116	42.1013	22.9097	18.7972	18.2988	1.4559	3.04775	1.65846	1.36075	1.32467
Tb09.160.1100	630	hypothetical protein, conserved	0	9.69535	17.2664	39.1211	240	20.9916	10.1727	1.78089	4.03504	24.7541	2.16512	1.04924
Tb09.160.1110	648	hypothetical protein, conserved	0	10.9728	10.2562	67.7506	24.4042	12.1937	10.155	0.93469	6.17439	2.22405	1.11126	0.925464
Tb09.160.1120	685	hypothetical protein, conserved	0	13.8516	12.8178	11.3872	12.8566	8.58775	9.45019	0.925363	0.822083	0.928168	0.619982	0.682245
Tb09.160.1140	1453	electon transport protein SCO1/SCO2, putative	Mitochondrial electron transport	12.3209	10.8988	19.2559	59.5823	12.7743	16.1086	0.884583	1.56287	4.83588	1.0368	1.30742
Tb09.160.1150	396	hypothetical protein, unlikely	unlikely	183.803	#N/A	240	85.1414	36.1757	39.11	#N/A	1.30575	0.463221	0.196817	0.212782
Tb09.160.1160	2505	nucleolar protein	rRNA-tRNA processing	113.179	44.5715	240	240	182.869	84.9259	0.393814	2.12054	2.12054	1.61575	0.750368
Tb09.160.1170	396	hypothetical protein, unlikely	unlikely	98.7404	#N/A	43.0298	27.9324	27.062	40.0835	#N/A	0.435787	0.282888	0.274072	0.405948
Tb09.160.1180	1962	nucleolar protein	rRNA-tRNA processing	79.7587	32.3286	240	122.743	103.974	58.5875	0.405331	3.00908	1.53893	1.30361	0.734559
Tb09.160.1190	396	hypothetical protein, unlikely	unlikely	105.646	#N/A	70.6528	24.2422	89.3397	23.6904	#N/A	0.668771	0.229467	0.845654	0.224243
Tb09.160.1200	25895	microtubule- associated protein	Cytoskeleton	42.9837	240	240	93.2357	102.346	240	5.58351	5.58351	2.16909	2.38103	5.58351
Tb09.160.1210	3409	hypothetical protein, conserved	0	20.0477	20.61	240	47.3844	14.8279	21.8831	1.02804	11.9714	2.36358	0.739632	1.09155
Tb09.160.1220	852	hypothetical protein, conserved	0	9.74572	12.4974	74.0402	21.5145	11.3283	11.0295	1.28235	7.5972	2.20758	1.16239	1.13173
Tb09.160.1240	2416	hypothetical protein, conserved	translation	11.17	20.583	24.1079	20.8649	16.0345	17.896	1.84271	2.15828	1.86795	1.4355	1.60215
Tb09.160.1250	3843	hypothetical protein, conserved	0	11.4977	19.6854	43.0753	22.1774	13.9875	25.7826	1.71211	3.74642	1.92886	1.21655	2.24241
Tb09.160.1260	1661	hypothetical protein, conserved	0	10.3876	16.7774	21.0705	25.5244	11.0954	12.9537	1.61513	2.02843	2.4572	1.06814	1.24703
Tb09.160.1270	309	hypothetical protein, unlikely	unlikely	15.0778	#N/A	18.3903	30.0803	11.4496	16.9352	#N/A	1.21969	1.99501	0.759371	1.12319
Tb09.160.1280	2040	hypothetical protein, conserved	0	10.7344	25.7698	17.9028	17.0387	15.9221	15.8943	2.40068	1.6678	1.5873	1.48327	1.48069
Tb09.160.1290	6163	hypothetical protein, conserved	0	19.9797	31.0289	240	68.0938	27.6545	62.2332	1.55302	12.0122	3.40814	1.38413	3.11482
Tb09.160.1310	1887	hypothetical protein, conserved	0	14.6215	17.4867	38.248	49.653	10.834	26.6004	1.19596	2.61588	3.3959	0.740963	1.81927
Tb09.160.1330	1352	hypothetical protein, conserved	cytoskeleton	11.2991	15.7892	25.059	20.0588	12.3184	10.336	1.39739	2.21779	1.77526	1.09021	0.914767
Tb09.160.1370	1697	hypothetical protein, conserved	0	11.2324	21.858	43.5167	39.4848	16.0743	12.9745	1.94598	3.8742	3.51525	1.43106	1.15509
Tb09.160.1400	4146	hypothetical protein, conserved	0	15.6198	32.5149	131.199	23.5489	13.4573	16.9866	2.08165	8.39955	1.50763	0.861554	1.0875
Tb09.160.1410	543	hypothetical protein, unlikely	unlikely	26.7343	#N/A	240	25.3936	21.8836	17.2257	#N/A	8.97724	0.949853	0.818559	0.64433
Tb09.160.1440	1718	hypothetical protein, conserved	0	27.8548	35.0039	240	37.9159	19.8839	14.6804	1.25666	8.61612	1.3612	0.713842	0.527033
Tb09.160.1470	1091	hypothetical protein, conserved	0	8.86013	21.2731	11.5152	13.2234	9.01769	9.35592	2.401	1.29966	1.49246	1.01778	1.05596
Tb09.160.1480	258	hypothetical protein, unlikely	unlikely	47.6143	#N/A	240	42.8701	25.845	17.6849	#N/A	5.0405	0.900361	0.542798	0.37142
Tb09.160.1490	1218	hypothetical protein, conserved	0	24.7057	17.8143	240	31.7831	23.3559	11.8764	0.721058	9.71434	1.28647	0.945362	0.480715
Tb09.160.1500	294	hypothetical protein, unlikely	unlikely	16.1653	#N/A	18.6683	11.4575	7.07004	9.26289	#N/A	1.15483	0.708771	0.437358	0.573009
Tb09.160.1520	2538	hypothetical protein, conserved	0	15.2481	12.0143	102.002	125.964	15.3251	18.1454	0.787926	6.68949	8.26101	1.00506	1.19001
Tb09.160.1530	225	hypothetical protein, unlikely	unlikely	22.4001	#N/A	240	240	37.5852	#N/A	#N/A	10.7142	10.7142	1.6779	#N/A
Tb09.160.1550	276	hypothetical protein	0	9.33118	24.5532	13.3501	6.17797	7.49249	4.82168	2.6313	1.4307	0.662079	0.802952	0.516728
Tb09.160.1560	8500	hypothetical protein, conserved	0	16.2324	35.4436	240	38.7711	18.6042	34.6206	2.18351	14.7853	2.3885	1.14612	2.13281
Tb09.160.1570	638	hypothetical protein, conserved	0	10.7078	18.2813	8.47106	9.00132	7.83863	7.8642	1.70728	0.791108	0.840629	0.732045	0.734433
Tb09.160.1590	402	hypothetical protein, unlikely	unlikely	9.68757	#N/A	43.5221	11.2969	11.5582	9.20492	#N/A	4.49257	1.16612	1.19309	0.950178
Tb09.160.1600	426	hypothetical protein, unlikely	unlikely	10.5314	#N/A	37.4308	12.0706	10.1289	11.9372	#N/A	3.55421	1.14615	0.961783	1.13349
Tb09.160.1610	1639	hypothetical protein, conserved	0	10.5112	17.5552	36.5599	18.9705	15.3012	14.2473	1.67015	3.4782	1.80479	1.45571	1.35544
Tb09.160.1620	510	hypothetical protein, unlikely	unlikely	103.751	#N/A	240	240	240	240	#N/A	2.31323	2.31323	2.31323	2.31323
Tb09.160.1640	213	hypothetical protein, unlikely	unlikely	58.0139	#N/A	59.6691	240	114.115	#N/A	#N/A	1.02853	4.13694	1.96703	#N/A
Tb09.160.1660	301	hypothetical protein, conserved	0	75.3935	33.891	240	240	79.7572	77.0631	0.449521	3.1833	3.1833	1.05788	1.02214
Tb09.160.1670	657	hypothetical protein	0	10.8828	23.0329	14.2196	61.1745	23.6978	11.7098	2.11646	1.30661	5.62123	2.17755	1.07599
Tb09.160.1680	549	cytidine deaminase, putative	Nucleotides-Pyrimidines	10.5168	15.3086	16.5702	19.8053	9.8335	10.5568	1.45563	1.57559	1.8832	0.935025	1.0038
Tb09.160.1690	322	hypothetical protein, conserved	0	11.3451	13.8415	20.4206	37.6351	12.967	10.8508	1.22004	1.79995	3.3173	1.14296	0.956433
Tb09.160.1710	1152	hypothetical protein, conserved	0	8.91913	12.4152	12.0559	13.4649	10.1461	8.86243	1.39197	1.35169	1.50966	1.13757	0.993643
Tb09.160.1730	345	hypothetical protein, unlikely	unlikely	8.7416	#N/A	13.3366	10.239	8.3186	12.4479	#N/A	1.52565	1.17129	0.95161	1.42398
Tb09.160.1740	1287	hypothetical protein, conserved	0	9.23211	18.0945	11.4946	13.777	9.35189	11.8072	1.95995	1.24507	1.4923	1.01297	1.27893
Tb09.160.1760	1231	hypothetical protein, conserved	0	19.7329	31.5248	18.0318	86.1427	23.2265	27.7645	1.59757	0.913793	4.36542	1.17704	1.40701
Tb09.160.1780	3072	protein kinase, putative	Protein kinase	13.3113	21.4351	40.0162	24.0389	14.7189	240	1.61029	3.00619	1.8059	1.10575	18.0298
Tb09.160.1790	1701	hypothetical protein, conserved	0	11.6384	27.1295	10.2035	13.4185	10.7679	16.0306	2.33103	0.876708	1.15295	0.925203	1.37739
Tb09.160.1820	834	cytochrome oxidase subunit V	Mitochondrial electron transport	14.947	14.282	240	240	15.6951	14.3758	0.955506	16.0567	16.0567	1.05005	0.96178
Tb09.160.1950	1154	acidocalcisomal exopolyphosphatase, putative	Acidocalcisome	9.34749	12.7999	29.3479	21.7738	10.4868	13.8789	1.36935	3.13965	2.32938	1.12189	1.48477
Tb09.160.1960	318	hypothetical protein, unlikely	unlikely	9.0993	#N/A	58.4864	28.911	10.7789	8.35518	#N/A	6.42757	3.17728	1.18458	0.918223
Tb09.160.1980	1753	hypothetical protein, conserved	0	16.6278	15.0356	240	240	31.8008	26.218	0.904248	14.4337	14.4337	1.91251	1.57676
Tb09.160.1990	515	hypothetical protein, conserved	0	8.19849	11.9594	15.5503	28.1928	8.90846	8.91632	1.45873	1.89673	3.43877	1.0866	1.08756
Tb09.160.2000	1229	pseudouridylate synthase, putative	rRNA-tRNA processing	9.25997	15.7457	12.8482	12.0719	8.11254	9.93526	1.7004	1.3875	1.30367	0.876087	1.07293
Tb09.160.2010	1120	N-acetyltransferase, putative	Enzyme	9.11693	12.1798	13.0344	13.993	9.64374	11.6413	1.33596	1.42969	1.53484	1.05778	1.27689
Tb09.160.2020	518	thioredoxin	Redox pathways	9.8445	12.209	34.4878	85.6875	14.6111	13.5132	1.24018	3.50326	8.7041	1.48419	1.37266
Tb09.160.2040	895	hypothetical protein, conserved	0	13.5014	14.3365	240	34.8649	9.89491	8.73141	1.06186	17.776	2.58232	0.732882	0.646706
Tb09.160.2050	4645	endo-beta-N-acetylglucosaminidase, putative	Glycan synthesis & metabolism	14.0284	21.9784	240	23.1026	12.1031	16.3348	1.56671	17.1082	1.64685	0.862759	1.16441
Tb09.160.2060	551	hypothetical protein, conserved	0	10.1895	20.3897	26.6228	63.1273	11.1963	13.7441	2.00105	2.61276	6.19533	1.09881	1.34885
Tb09.160.2070	1101	cyclophilin type peptidyl-prolyl cis-trans isomerase, putative	Chaperone	21.0414	16.9332	62.491	123.252	31.0181	17.0168	0.804758	2.9699	5.85759	1.47415	0.80873
Tb09.160.2080	462	hypothetical protein, unlikely	unlikely	22.8935	#N/A	47.5016	80.0056	31.2084	12.2732	#N/A	2.07489	3.49468	1.3632	0.536099
Tb09.160.2090	2412	hypothetical protein, conserved ,zinc finger protein family member, putative	RNA binding	15.0282	18.2576	39.6565	18.4627	12.9529	23.1482	1.21489	2.63881	1.22854	0.861905	1.54032
Tb09.160.2110	749	U5Cwc21 small nuclear ribonucleoprotein	RNA processing	10.2582	13.0636	20.6976	15.0812	8.29959	10.4504	1.27347	2.01766	1.47015	0.809068	1.01873
Tb09.160.2130	1312	hypothetical protein, conserved	0	11.9316	14.918	240	34.5756	14.6945	8.23096	1.25029	20.1146	2.89781	1.23156	0.689844
Tb09.160.2140	303	hypothetical protein, unlikely	unlikely	10.1931	#N/A	16.0364	19.4454	12.1238	#N/A	#N/A	1.57326	1.9077	1.18942	#N/A
Tb09.160.2150	676	U6 snRNA-associated Sm-like protein LSm6p ,Sm- like protein	RNA processing	14.3145	13.0344	77.9693	96.933	18.3435	19.3756	0.910568	5.44686	6.77164	1.28146	1.35356
Tb09.160.2160	356	hypothetical protein, conserved	0	13.7024	20.9166	21.9158	240	38.2501	17.8035	1.52649	1.59941	17.5152	2.79149	1.2993
Tb09.160.2170	368	hypothetical protein, conserved	0	13.3555	14.3333	22.8706	240	17.0325	13.1557	1.07321	1.71244	17.9701	1.27531	0.985033
Tb09.160.2180	818	hypothetical protein, conserved	0	9.6904	14.0159	13.07	10.6845	9.2147	11.3573	1.44637	1.34875	1.10258	0.95091	1.17202
Tb09.160.2200	1954	hypothetical protein, conserved	0	14.6452	13.5765	27.031	34.2379	18.8392	13.3126	0.92703	1.84573	2.33783	1.28638	0.909008
Tb09.160.2210	642	glutaredoxin-like protein	Redox pathways	12.6816	14.3929	29.8013	34.4038	16.4307	16.0909	1.13495	2.34997	2.71289	1.29563	1.26884
Tb09.160.2220	927	hypothetical protein, conserved	0	9.88008	17.0486	16.1994	15.0779	11.0914	11.2593	1.72555	1.6396	1.52609	1.1226	1.13959
Tb09.160.2230	707	hypothetical protein, conserved	0	9.35838	16.4182	11.7388	13.7713	7.49688	12.8795	1.75439	1.25437	1.47154	0.801087	1.37626
Tb09.160.2240	1827	hypothetical protein, conserved	0	12.13	18.0678	240	13.1057	9.30819	14.5261	1.48951	19.7856	1.08043	0.767367	1.19753
Tb09.160.2250	601	hypothetical protein, conserved	Mitochondrial translation	13.3718	15.5007	29.5579	49.4958	34.7868	13.5366	1.15921	2.21047	3.70152	2.60151	1.01233
Tb09.160.2260	2076	kinesin, putative ,MCAK-like kinesin, putative	Cytoskeleton	16.2497	25.2027	240	26.7851	17.5053	18.6221	1.55097	14.7695	1.64835	1.07727	1.146
Tb09.160.2280	1596	hypothetical protein, conserved	0	9.50119	22.0075	15.7395	12.1292	8.86211	11.367	2.31629	1.65658	1.2766	0.932738	1.19637
Tb09.160.2290	4242	hypothetical protein, conserved	0	26.9967	30.504	240	47.116	19.4358	33.6136	1.12992	8.88998	1.74525	0.719932	1.2451
Tb09.160.2350	617	hypothetical protein, conserved	0	9.00908	12.4607	11.117	17.8651	8.87289	6.41691	1.38313	1.23398	1.98301	0.984884	0.712272
Tb09.160.2360	1207	poly(A) export protein, putative	Nucleo-cytoplasmic transport	11.0941	14.8343	17.4952	16.3022	10.0009	14.8616	1.33713	1.57698	1.46945	0.90146	1.33959
Tb09.160.2370	735	hypothetical protein, conserved	0	23.9867	17.6428	240	240	64.5114	26.3516	0.735524	10.0056	10.0056	2.68947	1.09859
Tb09.160.2380	340	hypothetical protein, conserved	0	17.3962	16.1871	240	240	18.4951	15.524	0.930498	13.7961	13.7961	1.06317	0.892378
Tb09.160.2390	291	hypothetical protein, unlikely	unlikely	18.0784	#N/A	240	240	51.0139	15.4809	#N/A	13.2755	13.2755	2.82181	0.856321
Tb09.160.2400	1899	hypothetical protein, conserved	0	11.27	18.684	19.3127	19.9132	11.0003	14.2162	1.65786	1.71364	1.76693	0.976071	1.26143
Tb09.160.2420	903	syntaxin, putative	Vesicular transport	9.342	18.0156	128.817	66.0177	8.14718	11.1458	1.92845	13.789	7.06677	0.872103	1.19309
Tb09.160.2430	291	hypothetical protein, unlikely	unlikely	8.84847	#N/A	137.511	37.0455	8.87123	8.57333	#N/A	15.5406	4.18666	1.00257	0.968906
Tb09.160.2440	489	hypothetical protein, conserved	0	10.2337	21.1073	17.0458	12.759	8.88532	11.1099	2.06252	1.66565	1.24676	0.868238	1.08561
Tb09.160.2450	562	hypothetical protein, conserved	0	16.263	16.7162	23.5828	37.4914	39.9678	17.7342	1.02786	1.45009	2.30531	2.45759	1.09046
Tb09.160.2460	2214	hypothetical protein, conserved	0	11.5546	18.7859	12.1172	16.5934	10.4262	14.0392	1.62584	1.0487	1.43609	0.902349	1.21504
Tb09.160.2470	2152	hypothetical protein, conserved	0	11.069	19.3133	26.9817	11.2393	8.97049	24.0124	1.74481	2.43759	1.01538	0.810415	2.16934
Tb09.160.2480	1042	hypothetical protein, conserved	0	9.27717	15.0892	21.3364	17.8655	10.6461	12.9044	1.62649	2.29988	1.92575	1.14756	1.39098
Tb09.160.2490	631	ribosomal protein S7, putative	Ribosome	129.115	29.8085	111.009	240	37.1564	240	0.230867	0.859768	1.8588	0.287777	1.8588
Tb09.160.2500	147	hypothetical protein, unlikely	unlikely	12.2799	#N/A	12.5448	57.7321	#N/A	12.5807	#N/A	1.02157	4.70135	#N/A	1.02449
Tb09.160.2540	684	alpha/beta-hydrolase-like protein	Enzyme	15.1063	21.8905	50.6569	240	35.282	35.2423	1.4491	3.35336	15.8874	2.33558	2.33295
Tb09.160.2550	631	ribosomal protein S7, putative	Ribosome	131.684	31.6283	113.054	240	36.652	240	0.240183	0.858527	1.82254	0.278333	1.82254
Tb09.160.2560	147	hypothetical protein, unlikely	unlikely	12.2799	#N/A	12.5448	57.7321	#N/A	12.5807	#N/A	1.02157	4.70135	#N/A	1.02449
Tb09.160.2600	684	alpha/beta-hydrolase-like protein	Enzyme	15.1063	21.8905	50.6569	240	35.282	35.2423	1.4491	3.35336	15.8874	2.33558	2.33295
Tb09.160.2620	1669	hypothetical protein, conserved	0	12.6601	16.8755	19.2443	35.3783	14.8687	14.6032	1.33296	1.52007	2.79447	1.17445	1.15348
Tb09.160.2650	3974	hypothetical protein, conserved	0	24.1119	50.3973	240	41.5045	14.1824	240	2.09014	9.9536	1.72133	0.58819	9.9536
Tb09.160.2770	2322	fatty acyl CoA syntetase 1	Lipids & fatty acids	24.6341	16.0628	219.25	39.2623	19.851	10.9573	0.652055	8.90027	1.59382	0.805833	0.444802
Tb09.160.2780	3238	fatty acyl CoA synthetase 2	Lipids & fatty acids	23.0647	18.446	240	90.882	28.6443	20.5847	0.799751	10.4055	3.94031	1.24191	0.892476
Tb09.160.2810	2800	fatty acyl CoA synthetase 3	Lipids & fatty acids	26.9533	20.7546	240	104.118	20.5277	23.6423	0.770019	8.90429	3.86292	0.761601	0.877158
Tb09.160.2840	2800	fatty acyl CoA synthetase 4	Lipids & fatty acids	25.0526	18.1286	240	163.798	20.8926	28.39	0.723624	9.57985	6.53815	0.833949	1.13322
Tb09.160.2850	273	hypothetical protein, unlikely	unlikely	19.9751	#N/A	240	83.1035	16.9624	47.602	#N/A	12.0149	4.16035	0.849174	2.38306
Tb09.160.2860	1409	hypothetical protein, conserved	0	13.3741	18.1623	19.7154	22.8338	16.266	16.6682	1.35802	1.47415	1.70732	1.21623	1.2463
Tb09.160.2870	165	hypothetical protein, unlikely	unlikely	11.7289	#N/A	35.5027	45.5273	18.467	15.782	#N/A	3.02694	3.88163	1.57449	1.34556
Tb09.160.2890	962	hypothetical protein, conserved	0	8.35805	13.6802	19.4455	13.0615	7.32362	8.21244	1.63677	2.32656	1.56275	0.876235	0.982578
Tb09.160.2900	1683	PRP3, putative	RNA processing	15.8754	17.551	13.2667	11.4747	10.3527	11.6967	1.10555	0.835674	0.722801	0.65212	0.736783
Tb09.160.2910	1169	tricarboxylate carrier, putative	Mitochondrial pathway	14.9942	18.0689	43.3861	240	13.9925	12.7593	1.20506	2.89353	16.0062	0.933197	0.850953
Tb09.160.2960	3209	hypothetical protein, conserved	0	13.9568	19.5031	240	17.9061	17.4051	15.3999	1.39739	17.1959	1.28296	1.24707	1.10339
Tb09.160.2970	1633	KREL1	Mitochondrial RNA	10.0691	25.3077	17.8776	12.7026	7.86753	8.38057	2.51341	1.7755	1.26155	0.781357	0.832309
Tb09.160.2980	4447	GTPase activating protein, putative	Signalling	12.3204	35.0008	48.578	16.6545	18.2633	29.6442	2.84088	3.9429	1.35179	1.48236	2.40611
Tb09.160.2990	1258	DNA-damage inducible protein DDI1-like protein	DNA synthesis, modification, repair	11.0576	12.4348	40.5245	38.0218	8.32717	8.27884	1.12454	3.66486	3.43852	0.753073	0.748702
Tb09.160.3020	1287	hypothetical protein, conserved	0	28.1794	16.6009	240	167.307	25.0109	13.9775	0.589115	8.51685	5.9372	0.887559	0.496017
Tb09.160.3050	1361	hypothetical protein, conserved	0	10.1307	16.9979	15.8228	11.9718	9.98169	17.2107	1.67786	1.56187	1.18173	0.985292	1.69887
Tb09.160.3060	2166	hypothetical protein	0	12.2401	23.7956	53.1452	17.3892	13.1828	30.2029	1.94407	4.34191	1.42068	1.07702	2.46754
Tb09.160.3090	2654	heat shock protein, putative ,HSP70-like protein	Chaperone	161.571	46.6742	240	77.4061	29.9858	21.2652	0.288877	1.48541	0.479084	0.185589	0.131615
Tb09.160.3110	1688	mitochondrial processing peptide beta subunit, putative ,metallo-peptidase, Clan ME, Family M16	Mitochondrial biogenesis	8.66351	16.0966	17.2649	13.2024	8.56415	16.7494	1.85797	1.99283	1.52391	0.988531	1.93333
Tb09.160.3120	3257	hypothetical protein, conserved	0	12.4891	27.6664	240	22.4168	15.4714	18.287	2.21525	19.2168	1.79491	1.23879	1.46424
Tb09.160.3140	529	hypothetical protein, conserved	0	9.59766	16.4853	9.94911	27.1248	13.289	6.56353	1.71764	1.03662	2.82619	1.38461	0.683867
Tb09.160.3150	3114	RBP32	RNA binding	17.5966	42.2518	230.821	40.2397	13.9374	18.7799	2.40113	13.1174	2.28679	0.792051	1.06725
Tb09.160.3160	791	hypothetical protein, conserved	0	11.6676	13.1929	26.7208	30.8787	11.8283	12.2978	1.13073	2.29017	2.64654	1.01377	1.05401
Tb09.160.3210	1580	ubiquitin-activating enzyme e1, putative	Ubiquitin & proteasome	16.1097	27.943	19.1548	26.9342	14.1646	18.7444	1.73455	1.18903	1.67192	0.879261	1.16355
Tb09.160.3220	4038	hypothetical protein, conserved	0	15.3759	50.0574	240	23.6509	14.9021	34.5965	3.25557	15.6088	1.53818	0.969182	2.25004
Tb09.160.3240	4827	hypothetical protein, conserved	0	17.7962	31.7178	240	72.8511	33.1867	118.33	1.78228	13.486	4.09362	1.86481	6.64916
Tb09.160.3260	1513	hypothetical protein, conserved	0	11.236	14.0321	18.3858	10.7433	9.8283	13.1162	1.24885	1.63633	0.956146	0.874713	1.16733
Tb09.160.3270	1261	ATP-dependent DEAD box helicase, putative	Translation	199.85	88.9746	240	87.2619	240	14.3305	0.445207	1.2009	0.436637	1.2009	0.0717061
Tb09.160.3300	114	hypothetical protein, unlikely	unlikely	168.898	#N/A	240	154.982	124.905	12.8091	#N/A	1.42098	0.917607	0.739528	0.0758394
Tb09.160.3320	2176	hypothetical protein, conserved	0	10.3331	19.9829	11.3571	19.3064	12.2425	10.6437	1.93388	1.0991	1.86841	1.18479	1.03006
Tb09.160.3370	925	hypothetical protein, conserved	0	12.0925	16.2469	14.7308	15.8486	8.53569	9.22341	1.34355	1.21818	1.31062	0.705865	0.762737
Tb09.160.3380	2691	calcium/potassium channel (CAKC), putative	Ion channel or pump	13.6178	21.0587	19.8546	19.2649	11.435	16.8706	1.54641	1.45798	1.41468	0.839705	1.23886
Tb09.160.3410	1473	leucine-rich repeat protein (LRRP), putative	LRRP	11.8446	#N/A	17.8993	18.5153	10.9153	19.7156	#N/A	1.51118	1.56318	0.921539	1.66452
Tb09.160.3470	3868	condensin subunit 1, putative	Chromatin	15.0817	22.1178	240	240	25.5838	240	1.46653	15.9133	15.9133	1.69634	15.9133
Tb09.160.3480	1243	protein kinase, putative	Protein kinase	9.64362	21.1414	21.0332	17.2952	9.80198	11.3637	2.19226	2.18105	1.79343	1.01642	1.17837
Tb09.160.3490	720	hypothetical protein, conserved	0	12.5049	17.1651	11.5856	13.4165	9.71082	10.2543	1.37267	0.926487	1.0729	0.776562	0.820024
Tb09.160.3500	1230	hypothetical protein, conserved	0	9.7611	26.3561	11.7372	16.0209	9.03046	11.6998	2.70011	1.20245	1.6413	0.925148	1.19862
Tb09.160.3510	1138	presenilin-like aspartic peptidase, putative ,presenilin-like aspartic peptidase, clan AD, family A22A, putative	Protease or peptidase	10.6029	20.9766	16.3118	26.7494	11.5175	12.2885	1.97839	1.53843	2.52285	1.08627	1.15898
Tb09.160.3520	1188	radical SAM domain protein, putative	Enzyme	11.2959	31.5479	15.0293	20.0388	13.0847	9.64818	2.79287	1.33051	1.77399	1.15836	0.854132
Tb09.160.3530	315	hypothetical protein, conserved	0	240	34.5612	240	240	240	57.8774	0.144005	1	1	1	0.241156
Tb09.160.3540	600	hypothetical protein, conserved	0	10.3862	17.1728	15.535	20.9672	13.1746	10.6009	1.65343	1.49573	2.01876	1.26848	1.02067
Tb09.160.3550	862	hypothetical protein, conserved	0	9.3045	14.2993	9.59534	10.4353	8.4473	8.70537	1.53682	1.03126	1.12153	0.907873	0.935609
Tb09.160.3560	1356	hypothetical protein, conserved	0	13.9306	12.3846	20.4584	57.6647	17.4159	16.646	0.889024	1.4686	4.13944	1.2502	1.19493
Tb09.160.3590	2870	cAMP-specific phosphodiesterase	Signalling	15.7409	21.2118	240	105.642	30.7938	43.9321	1.34756	15.2469	6.71134	1.95629	2.79096
Tb09.160.3600	558	hypothetical protein, unlikely	unlikely	14.7444	#N/A	240	61.7369	24.2922	45.0969	#N/A	16.2773	4.18713	1.64755	3.05857
Tb09.160.3610	318	hypothetical protein, unlikely	unlikely	18.1136	#N/A	64.1895	128.997	21.4124	#N/A	#N/A	3.54372	7.12155	1.18212	#N/A
Tb09.160.3620	276	hypothetical protein, unlikely	unlikely	17.8102	#N/A	240	61.5273	22.1374	25.3434	#N/A	13.4754	3.45461	1.24296	1.42297
Tb09.160.3630	2778	cAMP-specific phosphodiesterase	Signalling	15.7415	19.7445	240	74.7774	26.7295	68.0486	1.25429	15.2463	4.75032	1.69802	4.32287
Tb09.160.3650	297	hypothetical protein, unlikely	unlikely	12.6218	#N/A	240	47.9258	39.9782	31.0617	#N/A	19.0147	3.79707	3.1674	2.46096
Tb09.160.3670	404	ribosomal protein S6, putative ,NHP2/RS6-like protein	RNA processing	87.687	25.1076	150.65	240	60.7383	23.0537	0.286332	1.71804	2.73701	0.692672	0.26291
Tb09.160.3680	138	hypothetical protein, unlikely	unlikely	160.187	#N/A	240	#N/A	240	#N/A	#N/A	1.49825	#N/A	1.49825	#N/A
Tb09.160.3690	2003	phosphomevalonate kinase protein, putative	Prenylation	9.34537	16.1247	20.241	18.2167	12.2333	10.576	1.72542	2.16589	1.94928	1.30902	1.13168
Tb09.160.3710	879	proliferative cell nuclear antigen (PCNA), putative	DNA synthesis, modification, repair	34.7869	26.9103	240	240	32.3893	31.2467	0.773575	6.89914	6.89914	0.931077	0.89823
Tb09.160.3730	1884	glutaminyl-tRNA synthetase, putative	Translation tRNA	17.3913	17.6583	33.2743	215.788	25.1591	14.5339	1.01535	1.91327	12.4078	1.44665	0.835697
Tb09.160.3740	386	hypothetical protein, conserved	0	18.5817	16.6903	240	240	29.3964	22.9191	0.898212	12.916	12.916	1.58201	1.23343
Tb09.160.3760	2913	mismatch repair protein MSH3, putative ,mismatch repair protein	DNA synthesis, modification, repair	11.3298	20.8419	72.6798	25.3877	14.7065	15.8941	1.83957	6.41492	2.24079	1.29804	1.40286
Tb09.160.3780	1467	hypothetical protein, conserved	0	11.2438	21.0869	39.1539	37.7558	18.1191	10.8192	1.87542	3.48226	3.35792	1.61147	0.962233
Tb09.160.3800	1121	hypothetical protein, conserved	Mitochondrial translation	9.62955	22.6155	8.81101	11.9167	8.46645	10.0767	2.34855	0.914997	1.23752	0.879216	1.04643
Tb09.160.3810	363	hypothetical protein, unlikely	unlikely	8.56958	#N/A	14.8727	13.9109	11.5699	14.5237	#N/A	1.73553	1.62329	1.35011	1.69479
Tb09.160.3820	1506	nucleolar RNA binding protein, putative	rRNA-tRNA processing	19.6134	18.072	140.285	66.0772	25.3157	32.4266	0.921413	7.15252	3.36899	1.29074	1.65329
Tb09.160.3830	1384	hypothetical protein, conserved	0	9.95408	30.3353	11.9227	12.8984	9.88291	12.3587	3.04752	1.19777	1.29579	0.99285	1.24157
Tb09.160.3850	1251	actin related protein 3, putative	Cytoskeleton_Actin	10.4016	23.9344	11.0334	12.7164	12.0492	13.3549	2.30103	1.06074	1.22254	1.1584	1.28392
Tb09.160.3870	213	hypothetical protein, unlikely	unlikely	10.5223	#N/A	18.6617	73.0298	17.0157	15.4047	#N/A	1.77354	6.94049	1.61711	1.464
Tb09.160.3880	612	hypothetical protein, conserved	0	9.68013	24.7755	19.9096	58.474	19.6054	16.8564	2.55942	2.05674	6.04062	2.02533	1.74134
Tb09.160.3890	2481	hypothetical protein, conserved	0	15.6202	21.474	17.1682	13.3375	10.291	21.0332	1.37476	1.0991	0.853863	0.658825	1.34654
Tb09.160.3910	708	hypothetical protein, conserved	0	10.699	12.2357	15.0598	27.322	10.9146	16.5111	1.14363	1.40759	2.55369	1.02015	1.54324
Tb09.160.3930	904	hypothetical protein, conserved	0	10.3728	18.117	15.3252	25.1417	10.8329	11.9266	1.74659	1.47744	2.42381	1.04436	1.1498
Tb09.160.3960	1410	actin, putative	Cytoskeleton_Actin	9.84133	18.713	13.0862	12.5774	7.43713	9.41065	1.90147	1.32972	1.27802	0.755703	0.956237
Tb09.160.3980	2637	eukaryotic translation initation factor 4 gamma, putative	Translation	16.4255	18.223	240	17.9291	10.6665	10.1875	1.10943	14.6114	1.09154	0.649387	0.620223
Tb09.160.3990	2414	cation transporter, putative	Ion channel or pump	10.7575	15.6593	19.8559	15.3917	10.7477	17.1567	1.45566	1.84576	1.43078	0.999082	1.59486
Tb09.160.4020	4126	ubiquitin carboxyl-terminal hydrolase, putative ,cysteine peptidase, Clan CA, family C19, putative	Ubiquitin & proteasome	15.5084	22.2644	240	25.0562	14.5594	30.1745	1.43563	15.4755	1.61565	0.938803	1.94568
Tb09.160.4090	3994	DNA topoisomerase ii	Mitochondrial DNA	25.7826	15.1898	240	55.9803	31.0345	83.1289	0.589152	9.30862	2.17125	1.2037	3.22423
Tb09.160.4120	4041	hypothetical protein, conserved	0	12.5082	29.3338	22.5368	20.2427	11.9516	15.9676	2.34517	1.80176	1.61836	0.955499	1.27657
Tb09.160.4130	1424	KREPB7	Mitochondrial RNA	9.09769	14.5437	9.91086	12.9115	8.40196	10.5356	1.59861	1.08938	1.41921	0.923527	1.15805
Tb09.160.4150	548	hypothetical protein, conserved	ubiquitin/proteasome	14.5106	16.1085	40.129	126.444	18.9485	14.0899	1.11012	2.76549	8.71389	1.30584	0.971007
Tb09.160.4160	216	hypothetical protein, unlikely	unlikely	14.4359	#N/A	38.5502	#N/A	#N/A	13.6508	#N/A	2.67044	#N/A	#N/A	0.945613
Tb09.160.4180	2647	inositol/phosphatidylinositol phosphatase, putative	signalling	11.1049	16.6696	42.5081	34.2142	15.7157	11.3644	1.5011	3.82787	3.081	1.4152	1.02337
Tb09.160.4200	390	60S acidic ribosomal protein, putative	Ribosome	192.813	71.1527	120.593	240	240	240	0.369023	0.62544	1.24473	1.24473	1.24473
Tb09.160.4210	6572	hypothetical protein, conserved	0	14.4541	25.4233	240	38.5782	27.5227	34.2589	1.7589	16.6043	2.66901	1.90414	2.37018
Tb09.160.4220	1152	general transcription factor IIB	RNA synthesis II	8.04346	19.8229	9.98429	9.79819	6.1716	7.81966	2.46447	1.24129	1.21816	0.767281	0.972176
Tb09.160.4240	1372	nucleosome assembly protein-like protein	Chromatin	31.7097	20.7875	240	240	24.2664	#N/A	0.655556	7.56865	7.56865	0.765266	#N/A
Tb09.160.4250	719	tryparedoxin peroxidase	Redox pathways	93.1088	44.9498	240	240	78.0334	72.5551	0.482766	2.57763	2.57763	0.838089	0.779251
Tb09.160.4270	440	hypothetical protein, conserved	0	11.2682	11.5752	35.7884	38.984	9.26046	13.9611	1.02724	3.17605	3.45965	0.821823	1.23898
Tb09.160.4280	719	tryparedoxin peroxidase	Redox pathways	92.5536	43.6253	240	240	79.9572	67.1003	0.471351	2.59309	2.59309	0.863901	0.724989
Tb09.160.4290	1947	hypothetical protein, conserved	0	24.7009	16.1734	28.2371	41.1439	27.6889	16.4449	0.654771	1.14316	1.66568	1.12097	0.66576
Tb09.160.4300	1438	solanesyl-diphosphate synthase, putative	Mitochondrial pathway	15.0951	18.0596	19.9009	32.4757	27.6063	17.1176	1.19639	1.31837	2.1514	1.82882	1.13399
Tb09.160.4310	3215	glutamate dehydrogenase	Citric acid cycle	17.418	43.3002	240	28.039	12.3893	19.922	2.48594	13.7788	1.60977	0.71129	1.14375
Tb09.160.4380	759	succinate dehydrogenase, putative	Citric acid cycle	9.0719	13.9765	240	24.3722	7.24694	5.94616	1.54064	26.4553	2.68656	0.798834	0.655448
Tb09.160.4400	1869	hypothetical protein, conserved	0	11.1931	17.4136	17.7568	17.937	9.50618	10.1776	1.55575	1.58641	1.60251	0.849292	0.909276
Tb09.160.4430	1297	NAD/FAD dependent dehydrogenase, putative ,ubiquitin-activating enzyme, putative	Ubiquitin & proteasome	15.5205	13.469	240	85.6263	23.2787	11.8848	0.867818	15.4634	5.51698	1.49987	0.765746
Tb09.160.4440	971	hypothetical protein, conserved	Mitochondrial pathway	12.0704	12.3429	25.0426	240	19.2435	12.0345	1.02257	2.0747	19.8833	1.59426	0.99702
Tb09.160.4450	801	40S ribosomal protein S3, putative	Ribosome	122.701	62.8759	167.101	240	240	240	0.51243	1.36186	1.95597	1.95597	1.95597
Tb09.160.4460	1947	TFIIF-stimulated CTD phosphatase, putative	Protein phosphatase	10.5091	9.57654	186.262	27.4265	13.9979	14.6684	0.911262	17.7239	2.60979	1.33198	1.39578
Tb09.160.4480	2350	TFIIF-stimulated CTD phosphatase, putative	Protein phosphatase	11.0502	9.58872	117.43	28.819	16.648	18.7835	0.86774	10.627	2.608	1.50657	1.69983
Tb09.160.4500	3011	hypothetical protein, conserved	0	14.5731	22.2937	240	37.7378	12.8718	25.325	1.52978	16.4687	2.58955	0.883255	1.73779
Tb09.160.4520	668	calmodulin, putative	Calcium	31.1637	18.3715	240	240	67.6756	17.8709	0.589515	7.70126	7.70126	2.17161	0.57345
Tb09.160.4530	474	hypothetical protein, unlikely	unlikely	32.0868	#N/A	240	240	34.6896	16.015	#N/A	7.47971	7.47971	1.08112	0.499114
Tb09.160.4540	2376	protein phosphatase 2A regulatory subunit, putative	Protein phosphatase	8.99637	15.1896	16.5093	10.3481	7.56383	8.60764	1.68842	1.83511	1.15025	0.840764	0.95679
Tb09.160.4550	3497	hypothetical protein, conserved	0	11.3802	26.8059	36.3092	21.3926	19.7182	17.4611	2.35549	3.19056	1.87981	1.73268	1.53434
Tb09.160.4560	1353	arginine kinase	Amino acid metabolism	157.058	44.574	240	240	83.4324	133.123	0.283806	1.5281	1.5281	0.531222	0.847606
Tb09.160.4570	1657	arginine kinase	Amino acid metabolism	147.845	43.8427	240	240	77.5313	59.676	0.296546	1.62333	1.62333	0.524411	0.40364
Tb09.160.4580	1589	hypothetical protein, conserved	0	13.3471	18.6728	15.2614	28.257	11.0818	12.5603	1.39902	1.14342	2.11709	0.83028	0.941049
Tb09.160.4590	1121	arginine kinase	Amino acid metabolism	163.431	47.4877	240	240	81.5372	240	0.290567	1.46851	1.46851	0.498909	1.46851
Tb09.160.4600	2093	ABC transporter, putative	Transporter	11.3836	24.4932	240	28.0903	13.4724	17.3013	2.15161	21.0829	2.4676	1.18349	1.51984
Tb09.160.4610	1607	hypothetical protein, conserved	0	10.5637	13.1244	24.5842	13.8031	13.0886	11.0244	1.2424	2.32723	1.30665	1.23902	1.04361
Tb09.160.4620	1239	inositol-1(or 4)-monophosphatase, putative	Signalling	9.99776	16.7931	240	20.4989	10.0583	18.9185	1.67969	24.0054	2.05035	1.00605	1.89227
Tb09.160.4630	1456	hypothetical protein, conserved	0	17.3829	25.962	72.9625	81.7346	16.0732	18.6308	1.49354	4.19738	4.70202	0.924657	1.07179
Tb09.160.4640	642	hypothetical protein, conserved	0	13.8774	19.6567	26.2731	45.9903	19.1375	14.4866	1.41646	1.89323	3.31405	1.37904	1.0439
Tb09.160.4660	2013	hypothetical protein, conserved	0	10.6362	31.2118	14.7086	12.972	10.2608	9.29606	2.9345	1.38289	1.21962	0.964713	0.874005
Tb09.160.4670	947	hypothetical protein, conserved	0	9.49092	13.2195	8.6039	11.0322	8.66734	9.92941	1.39286	0.90654	1.1624	0.913225	1.0462
Tb09.160.4680	2993	Rab geranylgeranyl transferase component A, putative ,Rab escort protein 1, putative	Prenylation	11.6863	26.4335	32.3681	19.5782	16.2863	16.1648	2.26192	2.76975	1.67531	1.39362	1.38322
Tb09.160.4690	447	hypothetical protein, conserved	0	10.2582	24.5792	45.3159	240	21.6571	11.7498	2.39606	4.41754	23.396	2.1112	1.14541
Tb09.160.4700	1526	hypothetical protein, conserved	0	10.2422	15.5815	30.9423	38.1032	11.87	16.7254	1.5213	3.02105	3.7202	1.15893	1.63298
Tb09.160.4710	4728	hypothetical protein, conserved	0	13.9792	46.5154	240	24.068	19.4791	23.5721	3.32748	17.1684	1.72171	1.39344	1.68623
Tb09.160.4720	855	hypothetical protein, conserved	0	12.7957	11.1912	240	52.0756	13.1921	13.5661	0.874612	18.7564	4.06979	1.03098	1.06021
Tb09.160.4730	402	hypothetical protein, unlikely	unlikely	16.1778	#N/A	240	20.8706	19.8999	16.7104	#N/A	14.8351	1.29007	1.23007	1.03292
Tb09.160.4750	2001	hypothetical protein, conserved	Mitochondrial translation	9.35086	18.3559	17.2213	17.2612	9.90844	10.5952	1.96302	1.84168	1.84595	1.05963	1.13307
Tb09.160.4760	4578	hypothetical protein	0	18.0586	21.7343	240	62.297	12.0843	12.2141	1.20354	13.2901	3.44972	0.669173	0.676361
Tb09.160.4770	2726	protein kinase, putative	Protein kinase	136.213	36.436	240	33.8445	23.826	39.7184	0.267493	1.76195	0.248468	0.174917	0.29159
Tb09.160.4810	378	hypothetical protein, unlikely	unlikely	20.1521	#N/A	240	30.7006	13.7946	8.56773	#N/A	11.9095	1.52345	0.684526	0.425154
Tb09.160.4830	3700	hypothetical protein, conserved	0	15.8544	21.3765	34.5131	32.9241	15.8714	12.0374	1.3483	2.17688	2.07665	1.00107	0.759248
Tb09.160.4840	721	hypothetical protein, conserved	0	16.2424	14.2103	153.79	240	17.2429	24.5947	0.874886	9.46842	14.7761	1.06159	1.51422
Tb09.160.4850	1473	hypothetical protein, conserved	0	9.68985	34.532	29.2839	51.2839	13.7443	13.4099	3.56373	3.02212	5.29254	1.41842	1.38392
Tb09.160.4860	1907	hypothetical protein, conserved	0	13.4994	21.9152	17.6807	14.3049	15.6541	71.2127	1.62342	1.30974	1.05968	1.15962	5.27527
Tb09.160.4870	7738	hypothetical protein, conserved	0	15.198	98.6567	240	26.0449	27.1198	240	6.49143	15.7916	1.7137	1.78443	15.7916
Tb09.160.4890	519	hypothetical protein, unlikely	unlikely	13.2463	#N/A	21.2936	52.5093	37.2291	125.295	#N/A	1.60751	3.96407	2.81053	9.45889
Tb09.160.4900	336	hypothetical protein, unlikely	unlikely	12.6624	#N/A	51.3084	54.5157	#N/A	21.6986	#N/A	4.05204	4.30534	#N/A	1.71363
Tb09.160.4910	1788	flavoprotein monooxygenase, putative	Mitochondrial pathway	11.1557	29.4486	21.3119	22.6905	21.4428	19.02	2.63978	1.91041	2.03398	1.92214	1.70496
Tb09.160.4920	1099	hypothetical protein, conserved	0	9.87662	36.6058	16.9998	19.3389	17.6608	26.2775	3.70631	1.72122	1.95805	1.78814	2.66058
Tb09.160.4930	1073	hypothetical protein, conserved	0	9.4401	16.6325	13.4843	22.062	10.9973	21.4913	1.7619	1.42841	2.33705	1.16495	2.2766
Tb09.160.5020	1337	RNA-binding protein, putative	RNA processing	9.62561	12.9034	29.6264	34.1961	9.80882	8.62194	1.34053	3.07788	3.55262	1.01903	0.895729
Tb09.160.5030	1989	cAMP-specific phosphodiesterase, putative	Signalling	10.1382	22.4776	13.7009	15.8385	10.5567	16.6585	2.21711	1.35141	1.56226	1.04127	1.64314
Tb09.160.5040	420	hypothetical protein, conserved	0	13.528	11.2823	35.4317	34.5331	15.5037	11.1008	0.834	2.61914	2.55272	1.14605	0.820584
Tb09.160.5050	512	hypothetical protein, conserved	0	8.34605	19.2997	10.9087	11.743	10.9159	8.26162	2.31244	1.30705	1.40701	1.30791	0.989884
Tb09.160.5060	1151	hypothetical protein, conserved	0	16.914	14.9914	240	240	24.2799	14.3193	0.886329	14.1894	14.1894	1.43549	0.846597
Tb09.160.5070	826	DNA topoisomerase type IB small subunit	DNA synthesis, modification, repair	25.6712	17.6465	89.2925	240	61.8642	24.763	0.687405	3.47832	9.34901	2.40987	0.964623
Tb09.160.5080	1064	hypothetical protein, conserved	0	23.5945	29.7052	39.5893	135.539	15.897	13.2146	1.25899	1.6779	5.74451	0.673759	0.560072
Tb09.160.5100	728	hypothetical protein, conserved	0	14.3388	18.061	66.8449	240	12.756	16.2621	1.25959	4.66182	16.7378	0.889614	1.13413
Tb09.160.5110	693	hypothetical protein, conserved	0	12.349	15.4159	10.5996	12.9303	9.77309	18.6094	1.24835	0.858334	1.04707	0.791405	1.50695
Tb09.160.5120	4956	hypothetical protein, conserved	0	16.4197	56.1945	45.3547	23.866	15.9663	21.4498	3.42237	2.76221	1.45349	0.972387	1.30634
Tb09.160.5130	1614	hypothetical protein, conserved	0	11.6697	21.7381	30.353	240	13.2806	13.2446	1.86277	2.601	20.566	1.13804	1.13496
Tb09.160.5150	897	hypothetical protein, conserved	0	9.79663	13.6917	11.3487	15.755	12.0472	7.97653	1.39759	1.15842	1.60821	1.22972	0.814211
Tb09.160.5160	915	exosome complex exonuclease RRP40	RNA degradation	8.54288	15.0157	8.79853	10.081	6.80162	8.17385	1.75769	1.02992	1.18005	0.796174	0.956802
Tb09.160.5170	381	hypothetical protein, conserved	0	9.73025	15.707	25.6614	96.3491	17.8969	10.5734	1.61425	2.63728	9.90201	1.83931	1.08666
Tb09.160.5180	1350	hypothetical protein, conserved	0	12.7258	12.29	240	82.3433	12.7847	30.1307	0.965754	18.8593	6.47056	1.00462	2.36767
Tb09.160.5190	844	hypothetical protein, conserved	0	12.8859	18.6467	17.9851	32.9903	13.6678	15.3871	1.44707	1.39572	2.5602	1.06068	1.19411
Tb09.160.5200	2019	hypothetical protein, conserved	0	48.5549	20.234	240	240	44.0348	24.7138	0.416723	4.94286	4.94286	0.906908	0.508987
Tb09.160.5220	3840	RNA pseudouridylate synthase protein, putative	rRNA-tRNA processing	11.6422	42.7184	26.6659	16.3656	10.7631	11.4742	3.66927	2.29045	1.40571	0.924491	0.985567
Tb09.160.5230	762	hypothetical protein, conserved	0	10.6636	11.6733	21.4901	24.546	12.0264	10.6737	1.09469	2.01528	2.30185	1.1278	1.00094
Tb09.160.5240	1490	hypothetical protein, conserved	Mitochondrial translation	10.212	16.4339	18.0023	12.0207	8.52636	6.82347	1.60927	1.76286	1.17711	0.834934	0.66818
Tb09.160.5250	5134	adenosine monophosphate deaminase, putative ,AMP deaminase, putative	Nucleotides-Purines	16.5681	28.0679	240	22.9221	18.2129	83.0565	1.69409	14.4856	1.38351	1.09927	5.01302
Tb09.160.5260	1544	oxidoreductase, putative	Mitochondrial pathway	11.1477	13.0854	39.3712	20.0344	12.6202	29.7858	1.17382	3.53177	1.79718	1.13209	2.67193
Tb09.160.5270	1001	hypothetical protein, conserved	0	9.52717	14.9803	19.9655	16.5105	9.82582	23.8066	1.57238	2.09564	1.73299	1.03135	2.49881
Tb09.160.5280	2232	mitochondrial exoribonuclease DSS-1 ,exoribonuclease DSS-1 (EMBL:AY233297)	Mitochondrial RNA	9.45362	25.3492	10.5093	16.7013	8.8622	30.6433	2.68143	1.11166	1.76666	0.93744	3.24144
Tb09.160.5300	633	ADP-ribosylation factor-like protein, putative	Vesicular transport	9.30174	14.7024	64.8457	51.9668	7.51601	10.0742	1.58061	6.97135	5.58678	0.808022	1.08305
Tb09.160.5310	894	hypothetical protein, conserved	0	7.81583	9.95856	21.3217	17.335	8.4368	7.82388	1.27415	2.72802	2.21794	1.07945	1.00103
Tb09.160.5320	1142	hypothetical protein, conserved	0	9.31152	14.0319	14.0837	23.267	11.3577	12.9289	1.50694	1.5125	2.49873	1.21974	1.38849
Tb09.160.5330	1915	hypothetical protein	0	15.4636	12.015	240	105.466	48.874	34.3139	0.776988	15.5203	6.82029	3.16058	2.21901
Tb09.160.5480	1431	purine nucleoside transporter	Nucleotides-Purines	20.3055	27.1346	240	36.2583	18.5257	19.3	1.33632	11.8194	1.78563	0.912346	0.95048
Tb09.160.5490	2001	hypothetical protein, conserved	0	12.36	21.4951	58.771	12.9242	7.79847	14.0286	1.73909	4.75494	1.04565	0.630945	1.135
Tb09.160.5530	1523	hypothetical protein, conserved	0	39.5804	39.2946	240	240	32.5846	27.0625	0.99278	6.0636	6.0636	0.82325	0.683736
Tb09.160.5550	2732	calpain-like cysteine peptidase, putative ,cysteine peptidase, Clan CA, family C2, putative	Protease or peptidase	13.1065	17.9252	240	22.0795	10.9479	27.4782	1.36765	18.3115	1.68462	0.8353	2.09653
Tb09.160.5560	1514	adenylosuccinate lyase, putative	Nucleotides-Purines	21.1976	38.9677	240	29.4569	21.5356	19.2778	1.83831	11.322	1.38963	1.01594	0.909433
Tb09.160.5570	1801	hypothetical protein, conserved	0	10.3818	24.5848	17.8342	15.889	11.0577	11.6226	2.36807	1.71783	1.53046	1.06511	1.11952
Tb09.160.5580	1117	60S ribosomal protein L11, putative	Ribosome	177.647	62.786	64.582	240	240	240	0.353431	0.363541	1.35099	1.35099	1.35099
Tb09.160.5590	610	60S ribosomal protein L11, putative	Ribosome	183.516	76.0426	80.3668	240	240	240	0.414365	0.437928	1.30779	1.30779	1.30779
Tb09.160.5600	1099	ADP-ribosylation factor, putative	Vesicular transport	9.5163	13.6213	240	24.4192	12.4792	12.7131	1.43136	25.2199	2.56603	1.31135	1.33593
Tb09.160.5620	744	hypothetical protein, conserved	0	12.9495	13.2387	20.7105	26.7633	11.7124	12.7173	1.02234	1.59933	2.06674	0.904469	0.982071
Tb09.160.5640	6153	hypothetical protein, conserved	0	19.8087	36.7808	240	21.48	23.0954	30.6368	1.85681	12.1159	1.08438	1.16592	1.54664
Tb09.160.5650	2637	huntingtin interacting protein (HIP), putative	0	9.42487	23.1296	11.6418	11.9302	8.86395	11.5762	2.4541	1.23522	1.26582	0.940484	1.22826
Tb09.160.5660	1090	hypothetical protein, conserved	0	9.50241	20.2011	12.2248	12.7833	8.92155	7.79812	2.12589	1.2865	1.34527	0.938873	0.820647
Tb09.160.5670	4182	hypothetical protein, conserved ,predicted tetratricopeptide repeat protein	Cytoskeleton	11.4859	25.8144	240	17.4594	15.7149	26.2114	2.24748	20.8951	1.52007	1.36818	2.28204
Tb09.211.0040	524	hypothetical protein, conserved	0	31.4383	25.497	240	240	112.729	#N/A	0.811016	7.63399	7.63399	3.58573	#N/A
Tb09.211.0050	511	ubiquitin-conjugating enzyme e2, putative ,ubiquitin carrier protein, putative ,ubiquitin-protein ligase, putative	Ubiquitin & proteasome	179.15	27.6604	240	240	240	34.1018	0.154398	1.33966	1.33966	1.33966	0.190353
Tb09.211.0060	324	hypothetical protein, unlikely	unlikely	174.433	#N/A	28.6214	240	240	29.8217	#N/A	0.164083	1.37589	1.37589	0.170964
Tb09.211.0070	1698	hypothetical protein, conserved	0	14.9471	18.0894	18.9758	48.5011	12.3348	23.1965	1.21022	1.26953	3.24485	0.825229	1.5519
Tb09.211.0080	3669	hypothetical protein, conserved	0	16.35	24.2333	35.6281	27.7858	15.4642	23.0032	1.48216	2.17909	1.69944	0.945822	1.40692
Tb09.211.0090	1626	hypothetical protein, conserved	0	10.8845	21.6066	12.1843	12.8438	9.53398	14.7558	1.98508	1.11942	1.18001	0.875923	1.35567
Tb09.211.0100	1829	hypothetical protein, conserved	0	14.6097	21.4505	87.4891	21.3379	17.8225	16.113	1.46824	5.98844	1.46053	1.21991	1.1029
Tb09.211.0110	668	60S ribosomal protein L10, putative ,QM-like protein	Ribosome	238.636	40.6171	118.47	240	240	240	0.170205	0.496447	1.00571	1.00571	1.00571
Tb09.211.0120	584	nascent polypeptide associated complex subunit, putative	Translation	201.545	44.2513	240	240	227.969	240	0.21956	1.1908	1.1908	1.13111	1.1908
Tb09.211.0130	584	nascent polypeptide associated complex subunit, putative	Translation	200.135	45.6061	240	240	157.896	240	0.227877	1.19919	1.19919	0.788948	1.19919
Tb09.211.0140	1645	chaperone protein DNAj, putative	Chaperone	17.7027	18.9754	240	130.734	13.5853	14.6434	1.07189	13.5572	7.38495	0.767411	0.827184
Tb09.211.0160	2186	hypothetical protein, conserved	0	14.3723	18.9963	240	43.1931	16.3384	11.6044	1.32173	16.6988	3.0053	1.1368	0.807412
Tb09.211.0170	943	hypothetical protein, conserved	0	12.3298	17.4939	87.22	240	20.8213	22.4052	1.41884	7.07394	19.4651	1.6887	1.81717
Tb09.211.0180	2000	hypothetical protein, conserved	0	11.0989	19.0343	37.3907	29.1115	17.331	174.466	1.71498	3.36887	2.62292	1.56151	15.7193
Tb09.211.0190	1131	metalloprotease-like protein ,peptide deformylase, putative	Protease or peptidase	11.5756	12.0446	13.6283	12.9275	7.24982	10.8015	1.04052	1.17734	1.1168	0.626304	0.933126
Tb09.211.0200	1608	hypothetical protein, conserved	0	13.1137	16.4697	70.8622	30.7074	16.1003	18.7293	1.25591	5.40367	2.34162	1.22774	1.42823
Tb09.211.0210	1446	atypical dual specificity phosphatase, putative	Phosphatase	8.76569	19.2676	9.48218	11.4868	8.70122	8.5715	2.19807	1.08174	1.31043	0.992646	0.977847
Tb09.211.0220	1098	rhomboid-like protein ,serine peptidase, Clan S- , family S54, putative	Protease or peptidase	12.2231	15.0777	16.0965	25.8618	17.3151	9.31379	1.23354	1.3169	2.11582	1.41659	0.761985
Tb09.211.0230	683	hypothetical protein, conserved	Mitochondrial translation	7.56806	12.0686	13.8348	12.0961	8.60902	12.3273	1.59468	1.82805	1.59831	1.13755	1.62886
Tb09.211.0260	1710	hypothetical protein	0	14.2363	16.2825	17.9756	23.1246	11.3868	23.7429	1.14374	1.26266	1.62434	0.799843	1.66778
Tb09.211.0290	2167	hypothetical protein, conserved	0	19.6676	17.5777	240	32.4706	17.9017	240	0.893736	12.2028	1.65097	0.910209	12.2028
Tb09.211.0300	680	hypothetical protein, conserved	0	12.896	18.7979	106.537	240	21.9954	11.7639	1.45765	8.26126	18.6105	1.7056	0.912216
Tb09.211.0310	580	hypothetical protein, conserved	0	15.2106	13.2456	240	240	18.4148	12.1315	0.870814	15.7785	15.7785	1.21066	0.797568
Tb09.211.0320	2147	hypothetical protein, conserved ,predicted zinc finger protein	Ubiquitin & proteasome	12.3669	29.5157	81.6508	20.5624	14.3625	8.2732	2.38667	6.60238	1.6627	1.16137	0.668981
Tb09.211.0330	1601	chaperone protein DNAj, putative	Chaperone	12.4981	16.3959	114.004	28.1643	18.6187	13.3572	1.31187	9.12167	2.25349	1.48972	1.06874
Tb09.211.0340	668	60S ribosomal protein L10, putative ,QM-like protein	Ribosome	240	40.1576	118.85	240	240	240	0.167323	0.495208	1	1	1
Tb09.211.0350	718	adenylate kinase	Nucleotides-Purines	35.2259	17.2351	52.3799	240	240	33.0454	0.489274	1.48697	6.81316	6.81316	0.938099
Tb09.211.0360	573	hypothetical protein, unlikely	unlikely	21.4961	#N/A	17.9551	240	23.0442	13.5415	#N/A	0.835271	11.1648	1.07202	0.629951
Tb09.211.0370	866	hypothetical protein, conserved	0	10.2821	14.6118	12.6906	12.1928	9.16061	8.25805	1.42109	1.23423	1.18582	0.890925	0.803145
Tb09.211.0380	1082	hypothetical protein	0	11.4305	23.9109	13.0493	18.6039	11.5086	10.1826	2.09185	1.14162	1.62757	1.00683	0.89083
Tb09.211.0400	2131	hypothetical protein, conserved	0	10.4654	18.0818	21.6804	25.7719	15.196	15.302	1.72777	2.07162	2.46258	1.45202	1.46215
Tb09.211.0410	1388	hypothetical protein, conserved	0	15.769	14.5105	23.7392	21.6691	15.2454	12.6363	0.920194	1.50543	1.37416	0.966797	0.801338
Tb09.211.0420	282	hypothetical protein, unlikely	unlikely	8.67809	#N/A	18.7575	9.3448	5.80191	8.76609	#N/A	2.16148	1.07683	0.66857	1.01014
Tb09.211.0430	2838	chloride channel protein, putative	Ion channel or pump	11.5758	25.8113	22.7141	17.7349	12.1412	12.6346	2.22976	1.9622	1.53206	1.04884	1.09146
Tb09.211.0440	700	hypothetical protein, conserved	0	9.07793	10.9819	33.7784	180.186	14.1585	9.37479	1.20974	3.72093	19.8488	1.55966	1.0327
Tb09.211.0450	487	hypothetical protein, conserved	0	16.677	21.0832	240	240	17.611	21.3016	1.26421	14.3911	14.3911	1.05601	1.27731
Tb09.211.0460	456	hypothetical protein, conserved	0	21.4135	25.5098	50.2307	240	169.227	32.2297	1.1913	2.34575	11.2079	7.90282	1.50511
Tb09.211.0470	2541	hypothetical protein, conserved	0	10.4714	19.5591	21.3446	13.7352	9.98756	13.0904	1.86785	2.03837	1.31168	0.953789	1.25011
Tb09.211.0480	3481	hypothetical protein, conserved	0	15.9218	22.2473	126.741	50.033	19.4139	30.359	1.39729	7.96025	3.14242	1.21933	1.90676
Tb09.211.0485	1646	hypothetical protein, conserved	0	20.779	12.6397	94.6105	240	58.1806	34.578	0.608291	4.55319	11.5501	2.79998	1.66409
Tb09.211.0490	327	hypothetical protein, unlikely	unlikely	18.3104	#N/A	240	35.967	18.9841	7.98381	#N/A	13.1073	1.96429	1.0368	0.436026
Tb09.211.0500	1510	hypothetical protein, conserved	0	15.1932	25.469	240	35.5364	20.4184	11.3493	1.67634	15.7966	2.33897	1.34392	0.747
Tb09.211.0510	894	cytochrome c oxidase assembly factor, putative	Mitochondrial electron transport	8.54268	12.4671	11.2924	12.0938	8.88306	14.4855	1.45939	1.32187	1.41569	1.03984	1.69566
Tb09.211.0520	1077	hypothetical protein, conserved	0	9.8102	12.2129	12.9038	10.8189	9.52083	8.10726	1.24492	1.31535	1.10282	0.970503	0.826412
Tb09.211.0530	798	hypothetical protein, conserved	0	14.9627	15.0244	17.1615	27.8584	20.6572	13.1154	1.00412	1.14696	1.86186	1.38058	0.876538
Tb09.211.0540	1143	fructose-1,6-bisphosphatase	Glucose & glycerol	30.045	34.1928	240	240	81.1915	21.0375	1.13805	7.98802	7.98802	2.70233	0.700199
Tb09.211.0560	1023	RNA-binding protein	RNA binding	221.235	35.0274	240	133.345	26.8029	92.4736	0.158327	1.08482	0.602731	0.121151	0.417988
Tb09.211.0580	6975	hypothetical protein, conserved	0	26.3094	31.7394	240	240	59.3055	240	1.20639	9.1222	9.1222	2.25415	9.1222
Tb09.211.0590	1583	tRNA nucleotidyltransferase, putative	rRNA-tRNA processing	9.27747	19.5234	8.73222	11.5173	7.62743	8.77593	2.10438	0.941229	1.24143	0.822146	0.945941
Tb09.211.0600	1319	hypothetical protein, conserved	0	13.9532	16.2946	62.2612	240	20.1145	18.6299	1.1678	4.46213	17.2003	1.44157	1.33517
Tb09.211.0610	3169	hypothetical protein, conserved	0	16.0774	16.8791	240	30.3842	17.282	33.1412	1.04987	14.9278	1.88988	1.07493	2.06136
Tb09.211.0620	1186	actin A	Cytoskeleton_Actin	28.4718	21.9731	240	240	74.8847	44.5401	0.77175	8.42941	8.42941	2.63014	1.56436
Tb09.211.0630	2116	actin A	Cytoskeleton	27.9957	22.2442	240	240	63.0956	43.9018	0.794556	8.57274	8.57274	2.25376	1.56816
Tb09.211.0680	1381	CAAX prenyl protease 1, putative ,metallo- peptidase, Clan M- Family M48	Protease or peptidase	35.8607	25.4249	240	240	76.1668	28.9928	0.708989	6.69256	6.69256	2.12396	0.808485
Tb09.211.0690	1103	hypothetical protein, conserved	0	18.7204	17.4758	45.4786	41.5266	38.5857	14.0673	0.933515	2.42937	2.21826	2.06116	0.751444
Tb09.211.0700	1106	isopentenyl-diphosphate delta-isomerase, putative ,isomerase, putative	Prenylation	9.42004	18.2316	30.3808	41.6974	12.5365	9.59395	1.9354	3.22513	4.42646	1.33083	1.01846
Tb09.211.0710	1827	hypothetical protein, conserved	0	8.81626	15.0111	26.9268	17.2358	11.1785	13.8548	1.70266	3.05422	1.955	1.26794	1.5715
Tb09.211.0720	1152	developmentally regulated GTP-binding protein, putative	Translation	8.2723	11.8063	9.85862	11.4752	8.40133	10.8397	1.42721	1.19176	1.38718	1.0156	1.31036
Tb09.211.0730	1225	hypothetical protein, conserved	0	14.5812	24.6059	18.7709	24.4095	14.3705	11.8056	1.68751	1.28734	1.67404	0.985553	0.809649
Tb09.211.0740	664	p21 antigen protein, putative	RNA degradation	20.2072	14.6988	240	240	29.0063	29.1492	0.727406	11.877	11.877	1.43544	1.44251
Tb09.211.0750	336	hypothetical protein, unlikely	unlikely	15.4996	#N/A	15.5448	55.9405	23.3077	11.6613	#N/A	1.00292	3.60917	1.50377	0.752366
Tb09.211.0760	813	hypothetical protein, conserved	0	11.1356	11.0405	15.0774	54.3969	13.1849	12.9487	0.991455	1.35398	4.88494	1.18403	1.16281
Tb09.211.0770	1195	hypothetical protein, conserved	0	10.5114	15.2666	21.9831	11.7109	8.57069	10.4552	1.45238	2.09136	1.11411	0.81537	0.994649
Tb09.211.0775	1210	hypothetical protein, conserved	0	47.7474	19.1039	240	240	58.2654	40.2213	0.400104	5.02646	5.02646	1.22029	0.842378
Tb09.211.0780	339	hypothetical protein, unlikely	unlikely	11.4215	#N/A	14.9221	15.6389	16.4355	14.0913	#N/A	1.30649	1.36925	1.439	1.23376
Tb09.211.0790	959	tRNA (guanine-N(7)-)-methyltransferase, putative ,methyltransferase, putative	rRNA-tRNA processing	9.32386	14.44	15.3514	17.7089	10.1208	10.2122	1.54872	1.64647	1.89931	1.08548	1.09528
Tb09.211.0800	1281	hypothetical protein, conserved	0	11.0889	13.9026	29.8756	29.4215	10.7809	11.6333	1.25374	2.6942	2.65324	0.972227	1.0491
Tb09.211.0810	2116	GTP-binding protein, putative	0	11.4883	16.9436	35.0475	20.0018	14.5218	15.5799	1.47485	3.0507	1.74105	1.26404	1.35615
Tb09.211.0820	1918	hypothetical protein, conserved	0	10.2126	22.0273	14.4817	22.3212	9.35323	17.1544	2.15687	1.41802	2.18565	0.915851	1.67972
Tb09.211.0830	1807	hypothetical protein, conserved	0	9.78054	21.9665	13.3159	12.8772	10.1249	13.9985	2.24594	1.36147	1.31662	1.03521	1.43126
Tb09.211.0840	1043	hypothetical protein, conserved	0	8.07566	11.4097	13.6316	17.5544	8.67583	46.7248	1.41286	1.68799	2.17374	1.07432	5.78588
Tb09.211.0850	2177	hypothetical protein, conserved	0	10.2911	16.5325	20.1362	16.9018	15.1798	122.195	1.60649	1.95666	1.64237	1.47505	11.8739
Tb09.211.0860	1455	glycosyl transferase, putative	Glycan synthesis & metabolism	10.0473	20.9265	13.1122	18.9336	12.6063	15.3954	2.08281	1.30505	1.88446	1.25471	1.5323
Tb09.211.0865	279	60S ribosomal protein L37, putative	Ribosome	110.139	50.6727	120.064	240	240	240	0.460078	1.09011	2.17906	2.17906	2.17906
Tb09.211.0870	1701	hypothetical protein, conserved	0	10.0833	23.1357	11.9321	15.3115	9.26629	20.5383	2.29446	1.18335	1.5185	0.918973	2.03686
Tb09.211.0890	611	hypothetical protein, conserved	0	10.5672	11.7381	22.8599	16.3869	10.0463	19.3687	1.1108	2.16328	1.55073	0.950705	1.8329
Tb09.211.0900	551	hypothetical protein, conserved	0	12.8223	17.6685	90.2515	240	28.3663	17.6861	1.37796	7.03865	18.7174	2.21227	1.37932
Tb09.211.0910	1609	hypothetical protein, conserved	0	12.0154	15.6105	25.1014	16.5576	12.5811	8.68595	1.2992	2.0891	1.37803	1.04708	0.7229
Tb09.211.0920	1722	hypothetical protein, conserved	0	9.192	16.2322	14.3742	15.1554	10.0758	9.2494	1.7659	1.56377	1.64876	1.09615	1.00624
Tb09.211.0930	2053	polyadenylate-binding protein 1, putative	Translation	23.2594	23.6102	240	58.2853	25.1328	17.5884	1.01508	10.3184	2.50589	1.08055	0.756186
Tb09.211.0940	1560	hypothetical protein, conserved	0	17.9436	19.7879	106.673	34.6487	11.9704	18.6919	1.10278	5.94489	1.93098	0.667111	1.0417
Tb09.211.0950	2963	hypothetical protein, conserved	0	10.6089	20.0857	20.3058	13.356	8.75125	9.12261	1.89328	1.91403	1.25894	0.824895	0.859899
Tb09.211.0960	2229	protein kinase, putative	Protein kinase	25.1059	19.6004	240	45.2929	25.9218	12.0732	0.780706	9.55949	1.80407	1.0325	0.480892
Tb09.211.0990	924	hypothetical protein, conserved	0	27.191	14.9563	240	240	23.4812	240	0.550044	8.82644	8.82644	0.863565	8.82644
Tb09.211.1000	1404	choline phosphorylceramide synthase	Lipids & fatty acids	14.6014	13.9233	240	240	17.3704	17.8812	0.953561	16.4368	16.4368	1.18964	1.22462
Tb09.211.1010	1350	choline phosphorylceramide synthase	Lipids & fatty acids	14.6965	14.1606	240	240	16.8823	18.0707	0.963538	16.3304	16.3304	1.14873	1.22959
Tb09.211.1020	1332	phosphatidylcholine:ceramide cholinephosphotransferase 2, putative	Lipids & fatty acids	15.2166	13.6406	240	240	17.3441	16.6188	0.89643	15.7723	15.7723	1.13982	1.09215
Tb09.211.1030	1134	inositol phosphorylceramide synthase	Lipids & fatty acids	13.9807	13.2454	240	240	19.1021	20.3329	0.947404	17.1665	17.1665	1.36632	1.45435
Tb09.211.1040	999	hypothetical protein, conserved	0	11.4536	18.4539	240	21.7644	12.3388	41.5951	1.61118	20.954	1.90022	1.07728	3.63161
Tb09.211.1050	923	hypothetical protein, conserved	0	9.16348	14.1644	10.2093	12.9021	9.15875	8.81887	1.54575	1.11413	1.408	0.999483	0.962393
Tb09.211.1070	3145	hypothetical protein, conserved ,zinc finger protein family member, putative	RNA binding	59.0628	20.0264	240	240	30.811	240	0.33907	4.06347	4.06347	0.521664	4.06347
Tb09.211.1090	318	hypothetical protein, unlikely	unlikely	53.2713	#N/A	240	#N/A	22.312	#N/A	#N/A	4.50524	#N/A	0.418838	#N/A
Tb09.211.1100	435	hypothetical protein, unlikely	unlikely	171.483	#N/A	#N/A	#N/A	55.1274	#N/A	#N/A	#N/A	#N/A	0.321474	#N/A
Tb09.211.1130	1107	hypothetical protein, conserved ,zinc finger protein family member, putative	RNA binding	47.2084	31.159	240	97.5666	20.9038	240	0.660031	5.08384	2.06672	0.442797	5.08384
Tb09.211.1150	751	hypothetical protein, conserved	0	121.613	20.653	240	240	210.004	20.6549	0.169826	1.97347	1.97347	1.72682	0.169841
Tb09.211.1170	2038	tubulin tyrosine ligase protein, putative	Cytoskeleton	15.0035	14.0781	26.8623	23.6998	15.6179	11.269	0.938325	1.79041	1.57962	1.04095	0.751094
Tb09.211.1190	2369	minichromosome maintenance (MCM) complex subunit, putative	DNA synthesis, modification, repair	13.1574	17.5933	240	29.6534	13.1134	36.3328	1.33714	18.2407	2.25374	0.996658	2.7614
Tb09.211.1210	1355	RAD51/dmc1 protein, putative	DNA synthesis, modification, repair	10.8595	17.9968	20.4185	85.4758	16.2664	10.6518	1.65723	1.88024	7.87106	1.49789	0.980873
Tb09.211.1220	1232	hypothetical protein, conserved	0	12.1227	21.1199	52.362	240	17.6915	14.808	1.74217	4.31933	19.7975	1.45936	1.22151
Tb09.211.1230	3373	hypothetical protein, conserved	0	12.3778	15.1949	240	45.6048	24.8702	23.7648	1.22759	19.3895	3.68439	2.00925	1.91994
Tb09.211.1240	1137	hypothetical protein, conserved	Mitochondrial biogenesis	19.4156	12.559	240	240	19.0384	14.9559	0.646853	12.3612	12.3612	0.980571	0.770304
Tb09.211.1250	923	proteasome alpha 1 subunit, putative ,20S proteasome subunit alpha-6, (putative)	Ubiquitin & proteasome	12.5368	16.9418	50.4142	240	18.1234	11.689	1.35136	4.02129	19.1436	1.44561	0.932373
Tb09.211.1260	333	hypothetical protein, unlikely	unlikely	7.6595	#N/A	7.27238	8.32193	6.60229	8.24207	#N/A	0.949459	1.08649	0.861974	1.07606
Tb09.211.1270	786	hypothetical protein, conserved	0	9.0367	10.9403	9.68881	10.472	8.31341	8.77198	1.21065	1.07216	1.15883	0.91996	0.970705
Tb09.211.1280	1400	hypothetical protein, conserved	0	9.04699	17.1528	17.7862	15.9355	11.761	10.7589	1.89596	1.96598	1.76141	1.29999	1.18922
Tb09.211.1290	1050	hypothetical protein, conserved	0	11.1204	15.2807	18.4651	32.4404	17.0128	11.2736	1.37411	1.66046	2.91719	1.52987	1.01378
Tb09.211.1300	760	hypothetical protein, conserved	0	9.89686	22.0738	22.9509	65.4339	14.8446	11.7485	2.23039	2.319	6.61158	1.49994	1.1871
Tb09.211.1310	1211	hypothetical protein, conserved	0	11.5476	10.3915	19.6674	26.9712	10.855	16.0624	0.899878	1.70316	2.33565	0.940021	1.39097
Tb09.211.1320	4373	AMP deaminase, putative	Nucleotides-Purines	12.5895	28.2701	28.7053	25.0698	11.272	16.3422	2.24553	2.2801	1.99133	0.895349	1.29809
Tb09.211.1330	1559	hypothetical protein, conserved ,membrane- trafficking protein, putative	Vesicular transport	13.2698	16.7333	31.1305	52.2996	14.245	13.5365	1.26101	2.34597	3.94125	1.07349	1.0201
Tb09.211.1340	291	hypothetical protein, unlikely	unlikely	34.4416	#N/A	113.213	240	46.5753	87.7105	#N/A	3.28711	6.96832	1.3523	2.54665
Tb09.211.1350	1132	peptidyl-prolyl cis-trans isomerase (cyclophilin- 40), putative ,cyclophilin-40, putative	Chaperone	15.5721	18.8642	30.2193	240	32.8815	17.7003	1.21141	1.94061	15.4122	2.11157	1.13667
Tb09.211.1360	537	hypothetical protein, conserved	0	80.2417	29.1436	240	240	144.855	240	0.363198	2.99096	2.99096	1.80523	2.99096
Tb09.211.1370	2354	glyceraldehyde-3-phosphate dehydrogenase, putative	Glucose & glycerol	15.163	16.8294	42.2857	149.571	18.3694	17.0062	1.1099	2.78875	9.86425	1.21147	1.12157
Tb09.211.1380	1478	lipoic acid containing carrier protein, putative	Mitochondrial pathway	26.1262	14.9579	240	240	107.947	18.6805	0.572524	9.18617	9.18617	4.13175	0.715009
Tb09.211.1390	2177	hypothetical protein, conserved	chaperone	61.8124	26.8945	240	240	240	36.1327	0.435099	3.88272	3.88272	3.88272	0.584554
Tb09.211.1400	1526	MCAK-like kinesin, putative	Cytoskeleton	13.1446	14.2566	240	93.5757	16.0768	38.2097	1.08459	18.2584	7.11892	1.22307	2.90686
Tb09.211.1470	990	PACRGB ,flagellar component	Cytoskeleton	29.1668	16.5393	240	49.9647	31.5975	12.2423	0.567058	8.22854	1.71307	1.08334	0.419735
Tb09.211.1480	1548	hypothetical protein, conserved	0	18.1405	24.4673	21.0178	19.8692	12.7869	10.9184	1.34877	1.15861	1.0953	0.704882	0.601878
Tb09.211.1500	1635	katanin, putative	Protease or peptidase	10.7219	21.2381	17.5262	15.893	7.96127	9.42482	1.98082	1.63461	1.48229	0.742524	0.879025
Tb09.211.1510	1439	Small nuclear RNA gene activation protein (SNAP) 50	RNA processing	10.582	20.7595	17.3466	17.2748	10.4353	15.3867	1.96178	1.63926	1.63248	0.986135	1.45404
Tb09.211.1520	456	hypothetical protein, unlikely	unlikely	9.83548	#N/A	#N/A	27.3746	13.1571	7.8853	#N/A	#N/A	2.78325	1.33771	0.80172
Tb09.211.1530	1052	kinetoplastid-specific dual specificity phosphatase, putative	Phosphatase	10.7373	16.2085	15.5635	19.5674	14.9931	11.9739	1.50956	1.44949	1.82238	1.39636	1.11517
Tb09.211.1540	495	hypothetical protein, conserved	0	14.8344	13.2187	25.4982	26.1872	15.6491	22.8616	0.891085	1.71885	1.7653	1.05492	1.54112
Tb09.211.1550	1679	chaperone protein DNAj, putative	Vesicular transport	53.9548	31.9035	240	240	28.7807	240	0.591299	4.44816	4.44816	0.533423	4.44816
Tb09.211.1560	351	hypothetical protein, unlikely	unlikely	12.7713	#N/A	18.4665	18.0204	11.6489	18.6565	#N/A	1.44594	1.41101	0.912113	1.46082
Tb09.211.1570	821	protein kinase, putative	Protein kinase	10.3667	20.26	35.5804	29.0917	10.5156	25.7391	1.95433	3.43219	2.80627	1.01437	2.48287
Tb09.211.1580	1280	hypothetical protein, conserved	0	12.8513	17.369	17.5125	26.4963	13.6155	51.1138	1.35154	1.36271	2.06176	1.05947	3.97734
Tb09.211.1590	599	hypothetical protein, conserved	0	11.9533	16.1256	51.2385	35.255	11.2083	39.9644	1.34905	4.28655	2.94939	0.937672	3.34338
Tb09.211.1600	948	hypothetical protein, conserved	Mitochondrial pathway	13.3529	16.4426	12.1431	35.4926	43.5865	14.4775	1.23138	0.909393	2.65803	3.26419	1.08422
Tb09.211.1610	1196	phosphatidylserine decarboxylase, putative	Lipids & fatty acids	9.98646	14.377	10.3545	15.1067	8.75596	13.2149	1.43964	1.03685	1.51272	0.876783	1.32328
Tb09.211.1620	4662	hypothetical protein, conserved	0	16.6374	35.0872	240	54.3499	20.7289	25.3222	2.10894	14.4254	3.26674	1.24593	1.52201
Tb09.211.1630	2466	hypothetical protein, conserved	0	10.2748	21.7924	26.4999	16.4436	10.6301	16.2302	2.12096	2.57913	1.60038	1.03459	1.57961
Tb09.211.1640	1809	hypothetical protein, conserved	0	10.0045	18.2412	24.0436	22.0828	11.1673	15.482	1.8233	2.40328	2.20729	1.11623	1.5475
Tb09.211.1650	711	hypothetical protein, conserved	0	8.80406	11.7422	27.8073	13.2948	10.0715	26.2699	1.33373	3.15846	1.51008	1.14396	2.98384
Tb09.211.1655	372	hypothetical protein, conserved ,predicted zinc finger protein	#N/A	9.9168	15.7986	17.3499	32.2545	19.0579	12.8662	1.59311	1.74955	3.25251	1.92178	1.29741
Tb09.211.1660	390	hypothetical protein, unlikely	unlikely	8.2451	#N/A	10.456	10.9229	9.66976	12.1186	#N/A	1.26815	1.32477	1.17279	1.4698
Tb09.211.1670	2121	hypothetical protein, conserved	0	10.0182	18.8836	16.3378	12.2673	10.9556	16.3964	1.88492	1.6308	1.2245	1.09357	1.63666
Tb09.211.1680	987	hypothetical protein, conserved	0	51.0881	23.2888	240	240	37.5953	18.4236	0.455856	4.69777	4.69777	0.735892	0.360624
Tb09.211.1690	559	hypothetical protein, conserved	chaperone	229.852	38.829	240	240	240	240	0.16893	1.04415	1.04415	1.04415	1.04415
Tb09.211.1695	872	small nuclear ribonucleoprotein Sm-F	RNA processing	74.0289	14.4442	240	71.208	240	18.5792	0.195116	3.24198	0.961894	3.24198	0.250972
Tb09.211.1720	378	hypothetical protein, conserved ,predicted zinc finger protein	RNA binding	18.7692	18.4125	#N/A	#N/A	21.1875	#N/A	0.980993	#N/A	#N/A	1.12884	#N/A
Tb09.211.1740	756	hypothetical protein, conserved	0	8.81866	28.4289	12.1305	20.7295	10.7547	8.03184	3.22372	1.37555	2.35064	1.21954	0.910778
Tb09.211.1750	1991	mitochondrial carrier protein, putative ,mitochondrial phosphate transporter, putative	Mitochondrial pathway	30.9219	19.6868	240	240	44.9612	15.2074	0.636664	7.76149	7.76149	1.45403	0.4918
Tb09.211.1760	1507	amino acid transporter, putative	Amino acid transporter	12.5779	15.7016	15.0516	20.2007	9.6455	12.7605	1.24835	1.19667	1.60605	0.766863	1.01452
Tb09.211.1770	896	hypothetical protein, conserved	0	15.7568	13.8686	240	43.4998	14.8686	10.9291	0.880168	15.2315	2.76071	0.943629	0.69361
Tb09.211.1780	450	hypothetical protein, conserved	0	9.387	15.1452	26.8649	21.3083	11.4076	13.0491	1.61342	2.86193	2.26998	1.21526	1.39012
Tb09.211.1790	1608	TAX-1 ,flagellar protein	Cytoskeleton	12.6099	12.1645	53.3384	37.2754	14.6379	12.2003	0.964675	4.22988	2.95604	1.16083	0.967518
Tb09.211.1800	1512	hypothetical protein, conserved	0	19.7867	14.1419	240	46.2316	240	20.5724	0.714718	12.1294	2.3365	12.1294	1.03971
Tb09.211.1810	450	hypothetical protein, conserved	0	19.3301	18.8241	18.7111	240	60.5754	16.0963	0.973823	0.96798	12.4159	3.13374	0.832706
Tb09.211.1820	6741	DNA polymerase epsilon catalytic subunit, putative	DNA synthesis, modification, repair	15.8128	27.4088	240	53.3336	28.6287	69.9175	1.73332	15.1775	3.3728	1.81047	4.42156
Tb09.211.1830	3989	hypothetical protein, conserved	0	11.8867	26.07	53.3877	29.2675	14.9959	16.4719	2.19322	4.4914	2.46222	1.26157	1.38575
Tb09.211.1840	441	hypothetical protein, unlikely	unlikely	8.75211	#N/A	19.5333	23.2228	10.1556	8.22749	#N/A	2.23183	2.65339	1.16036	0.940057
Tb09.211.1850	1221	hypothetical protein, conserved	0	7.84051	16.5451	26.3003	34.6845	8.98991	8.45068	2.11021	3.35441	4.42376	1.1466	1.07782
Tb09.211.1860	432	hypothetical protein, unlikely	unlikely	8.94624	#N/A	26.8939	8.33492	8.43336	#N/A	#N/A	3.00616	0.931667	0.94267	#N/A
Tb09.211.1870	1812	hypothetical protein, conserved	0	11.3395	16.3538	42.44	32.3601	15.4232	26.4217	1.4422	3.74268	2.85375	1.36013	2.33007
Tb09.211.1880	1715	hypothetical protein, conserved	0	8.02982	17.4762	24.2555	14.2975	10.0274	12.0884	2.17641	3.02068	1.78055	1.24877	1.50543
Tb09.211.1890	423	hypothetical protein, conserved	0	7.98363	14.5361	10.0091	21.3517	9.37298	19.1719	1.82074	1.2537	2.67443	1.17403	2.40141
Tb09.211.1900	1412	hypothetical protein, conserved	Mitochondrial electron transport	13.0234	12.4465	26.2508	19.0436	16.0526	13.1599	0.955706	2.01567	1.46226	1.2326	1.01048
Tb09.211.1910	3331	hypothetical protein, conserved	0	16.5133	18.9213	240	46.8728	35.0759	240	1.14582	14.5337	2.83849	2.1241	14.5337
Tb09.211.1930	2181	hypothetical protein, conserved	0	14.3065	17.5925	240	133.375	22.5346	103.338	1.22969	16.7756	9.32272	1.57514	7.22315
Tb09.211.1940	607	hypothetical protein, conserved	0	14.6166	24.167	128.393	73.7254	16.3156	30.4436	1.65339	8.78405	5.04396	1.11624	2.08281
Tb09.211.1950	1108	hypothetical protein, conserved ,predicted zinc finger protein	0	26.9186	14.2605	240	240	31.05	23.5821	0.529763	8.91577	8.91577	1.15348	0.876051
Tb09.211.1960	1113	3-demethylubiquinone-9 3-methyltransferase, putative	Enzyme	9.19926	10.565	12.9234	10.9725	8.12164	11.3616	1.14846	1.40483	1.19276	0.882859	1.23506
Tb09.211.2000	123	hypothetical protein, unlikely	unlikely	18.9115	#N/A	#N/A	#N/A	#N/A	#N/A	#N/A	#N/A	#N/A	#N/A	#N/A
Tb09.211.2010	801	hypothetical protein, conserved	0	16.0448	26.1389	240	31.4513	15.2092	18.3822	1.62912	14.9581	1.96022	0.94792	1.14568
Tb09.211.2020	2355	synaptojanin (N-terminal domain), putative	Vesicular transport	14.8358	26.076	209.085	22.7801	11.7745	19.2292	1.75764	14.0933	1.53548	0.793655	1.29613
Tb09.211.2060	580	hypothetical protein	0	170.961	19.3897	240	240	53.9426	#N/A	0.113416	1.40383	1.40383	0.315526	#N/A
Tb09.211.2070	535	hypothetical protein, conserved	0	7.83214	16.5384	8.92709	8.59574	6.91825	7.12658	2.1116	1.1398	1.0975	0.883315	0.909915
Tb09.211.2080	1830	hypothetical protein, conserved	0	9.13694	16.7832	21.5638	16.7094	8.91134	10.2289	1.83685	2.36007	1.82878	0.975309	1.11951
Tb09.211.2090	1083	hypothetical protein, conserved	0	10.4224	21.8881	10.5416	11.581	12.9627	8.85386	2.1001	1.01144	1.11116	1.24374	0.849503
Tb09.211.2100	1932	hypothetical protein, conserved	0	16.1493	14.6482	29.7588	15.0023	13.1754	12.4042	0.90705	1.84273	0.928974	0.815852	0.768094
Tb09.211.2110	1918	elongation factor 1-alpha, putative ,hsp70 subfamily B suppressor 1	Translation	12.9322	25.202	13.4332	15.5437	13.3912	11.2312	1.94879	1.03874	1.20194	1.0355	0.868469
Tb09.211.2120	582	hypothetical protein, unlikely	unlikely	184.864	#N/A	240	240	21.6556	13.7034	#N/A	1.29825	1.29825	0.117143	0.0741266
Tb09.211.2130	423	hypothetical protein, unlikely	unlikely	101.922	#N/A	240	240	34.7934	#N/A	#N/A	2.35474	2.35474	0.341373	#N/A
Tb09.211.2140	258	hypothetical protein, unlikely	unlikely	179.87	#N/A	240	183.968	66.5731	11.1146	#N/A	1.3343	1.02279	0.370118	0.0617922
Tb09.211.2150	1969	poly(A)-binding protein 1	Translation	240	37.9372	240	226.608	42.7426	23.8203	0.158072	1	0.944199	0.178094	0.0992512
Tb09.211.2160	1359	hypothetical protein	0	14.4477	16.6679	240	27.2085	20.9757	18.9899	1.15367	16.6117	1.88324	1.45184	1.31439
Tb09.211.2170	285	hypothetical protein, unlikely	unlikely	17.0206	#N/A	240	31.4964	22.8136	20.7194	#N/A	14.1005	1.85049	1.34035	1.21731
Tb09.211.2180	1956	hypothetical protein, conserved	0	11.138	21.4347	12.4777	11.8614	8.04625	10.0562	1.92447	1.12029	1.06495	0.722416	0.902875
Tb09.211.2190	573	hypothetical protein, conserved	0	12.3625	16.3699	69.4711	240	33.4389	17.4251	1.32416	5.61951	19.4136	2.70487	1.40951
Tb09.211.2200	1466	hypothetical protein, conserved	0	9.44173	17.3509	12.2874	17.1649	9.38154	10.7029	1.83768	1.3014	1.81799	0.993624	1.13357
Tb09.211.2205	317	hypothetical protein, conserved	RNA processing	7.54381	15.6369	40.9782	118.934	11.7407	11.6742	2.07281	5.43203	15.7658	1.55633	1.54752
Tb09.211.2220	1099	hypothetical protein, conserved	0	10.3629	14.5433	31.2681	28.1882	12.4365	10.2131	1.4034	3.01731	2.7201	1.2001	0.985542
Tb09.211.2230	1129	hypothetical protein, conserved	0	9.4838	21.5195	12.306	18.9495	10.5284	10.0371	2.26908	1.29758	1.99809	1.11015	1.05835
Tb09.211.2250	1101	hypothetical protein, conserved	0	17.5945	14.0027	240	240	16.9727	14.8033	0.795856	13.6406	13.6406	0.964656	0.841362
Tb09.211.2260	3216	protein kinase, putative	Protein kinase	11.3846	18.9165	145.34	22.1665	11.5483	31.4947	1.66159	12.7664	1.94707	1.01438	2.76644
Tb09.211.2270	339	hypothetical protein, conserved	0	43.0241	19.2623	240	240	129.235	14.5181	0.447709	5.57827	5.57827	3.00378	0.33744
Tb09.211.2290	1441	chaperone protein DNAj, putative	Chaperone	15.9021	28.8677	240	54.2359	15.7155	37.298	1.81534	15.0924	3.41061	0.988266	2.34548
Tb09.211.2300	2388	ATP-dependent DEAD/H RNA helicase, putative	RNA helicase	11.611	15.4172	14.3762	34.4225	11.2703	23.246	1.32781	1.23816	2.96465	0.970655	2.00207
Tb09.211.2310	1113	Bem46-like serine peptidase ,Serine peptidase, Clan SC, Family S09X	Protease or peptidase	11.3669	15.4315	18.6549	25.5359	9.80595	8.81214	1.35758	1.64116	2.24651	0.862675	0.775245
Tb09.211.2330	1083	small GTPase, putative ,GTP-binding protein, putative	Vesicular transport	38.9102	31.0805	240	240	44.2388	13.1535	0.798775	6.16806	6.16806	1.13695	0.338047
Tb09.211.2360	1011	protein kinase A catalytic subunit isoform 2 ,protein kinase A catalytic subunit	Protein kinase	25.8819	18.5407	240	48.56	20.0979	15.2603	0.716358	9.2729	1.87622	0.776525	0.589612
Tb09.211.2370	1000	mitochondrial carrier protein, putative	Mitochondrial pathway	8.76493	16.1489	9.56291	13.7728	8.05394	8.58035	1.84245	1.09104	1.57135	0.918883	0.978941
Tb09.211.2380	2264	hypothetical protein, conserved	Translation	104.41	42.0092	240	68.2724	93.7319	14.7754	0.402347	2.29862	0.653885	0.897726	0.141513
Tb09.211.2400	2255	hypothetical protein, conserved ,predicted zinc finger protein	DNA synthesis, modification, repair	19.7071	20.1887	21.4732	37.1751	20.4716	39.5444	1.02444	1.08962	1.88638	1.03879	2.00661
Tb09.211.2410	1044	protein kinase A catalytic subunit isoform 1 ,protein kinase A catalytic subunit	Protein kinase	31.6546	20.5713	240	58.5997	20.9329	19.4052	0.649869	7.58185	1.85123	0.661293	0.61303
Tb09.211.2420	7956	PRP8 protein homologue ,U5 snRNA-associated splicing factor	RNA processing	12.9813	30.7148	240	45.3667	33.0583	36.2643	2.36607	18.4881	3.49476	2.5466	2.79357
Tb09.211.2430	1975	hypothetical protein, conserved	Mitochondrial translation	11.407	18.8575	22.9512	20.1824	11.9941	10.8878	1.65316	2.01204	1.76931	1.05147	0.954491
Tb09.211.2440	809	hypothetical protein, conserved ,unc-50 related protein homolog	0	8.40786	12.8868	16.6277	17.1039	7.79616	8.29977	1.53271	1.97763	2.03427	0.927246	0.987144
Tb09.211.2450	1434	hypothetical protein, conserved	0	12.7304	17.9548	16.5208	14.0549	10.2334	9.72472	1.41039	1.29774	1.10404	0.803855	0.763895
Tb09.211.2460	2646	hypothetical protein, conserved	0	9.67011	20.5077	25.2725	14.3912	8.45913	20.5952	2.12073	2.61347	1.48822	0.874771	2.12978
Tb09.211.2530	1111	hypothetical protein, conserved	Mitochondrial biogenesis	11.5169	18.4674	27.8038	240	14.0648	19.3362	1.60351	2.41418	20.839	1.22124	1.67895
Tb09.211.2540	426	calmodulin-like protein, putative ,EF hand containing protein	Calcium	26.5358	16.7231	240	240	170.486	31.4672	0.63021	9.0444	9.0444	6.42477	1.18584
Tb09.211.2550	1344	hypothetical protein, conserved ,predicted WD40 repeat protein	0	10.0173	13.9664	50.8262	26.6285	13.4607	23.7581	1.39423	5.07384	2.65825	1.34375	2.37171
Tb09.211.2560	1048	nucleoside diphosphate kinase, putative	Nucleotides	8.53573	11.3688	23.6045	19.3585	8.00228	9.15911	1.33191	2.76538	2.26793	0.937504	1.07303
Tb09.211.2570	1788	T-complex protein 1, eta subunit, putative ,t- complex protein 1 (eta subunit), putative	Translation	64.1666	32.3224	240	240	49.0659	34.1271	0.503726	3.74026	3.74026	0.764665	0.531851
Tb09.211.2580	1167	30S Ribosomal protein S17, putative	Mitochondrial translation	14.9784	16.4749	15.5824	16.6053	7.74741	8.61806	1.09991	1.04032	1.10861	0.517238	0.575365
Tb09.211.2590	822	proteasome beta 2 subunit, putative ,20S proteasome subunit	Ubiquitin & proteasome	25.8289	21.7747	136.85	240	231.872	22.1835	0.843038	5.29834	9.29193	8.97723	0.858864
Tb09.211.2600	1816	hypothetical protein, conserved	0	11.512	17.6266	17.3511	31.7105	13.9068	12.8351	1.53115	1.50722	2.75456	1.20803	1.11493
Tb09.211.2610	1074	hypothetical protein, conserved	0	8.49488	13.8569	13.7029	13.8409	10.0111	10.3618	1.63121	1.61307	1.62932	1.17849	1.21977
Tb09.211.2620	588	hypothetical protein, conserved	0	10.8522	19.6819	24.6085	34.1414	8.61097	16.0043	1.81363	2.26759	3.14602	0.793473	1.47475
Tb09.211.2630	435	60S ribosomal protein L23, putative	Ribosome	185.997	37.2534	76.7719	240	240	240	0.200291	0.412759	1.29035	1.29035	1.29035
Tb09.211.2640	435	60S ribosomal protein L23, putative	Ribosome	192.363	41.0463	80.0584	240	240	240	0.213379	0.416183	1.24764	1.24764	1.24764
Tb09.211.2650	445	60S ribosomal protein L27a ,60S ribosomal protein L28 ,60S ribosomal protein L29	Ribosome	204.343	40.6086	50.3359	240	240	240	0.198728	0.246331	1.1745	1.1745	1.1745
Tb09.211.2660	2313	hypothetical protein, conserved	0	10.1804	17.0821	15.4233	19.0738	10.3951	18.1712	1.67795	1.51501	1.87359	1.0211	1.78492
Tb09.211.2670	1205	hypothetical protein, conserved	0	9.99668	22.0155	12.555	11.8558	8.7887	7.3586	2.20228	1.25592	1.18597	0.879161	0.736105
Tb09.211.2680	2007	hypothetical protein, conserved	0	18.8003	26.7737	15.2521	21.8413	10.421	14.683	1.42412	0.81127	1.16176	0.554299	0.780998
Tb09.211.2700	1660	hypothetical protein, conserved	0	32.6399	21.6935	240	240	65.7531	31.026	0.664629	7.35296	7.35296	2.0145	0.950553
Tb09.211.2720	1059	hypothetical protein, conserved	0	9.70682	12.9903	12.809	14.8191	7.46838	11.2252	1.33827	1.31959	1.52667	0.769395	1.15643
Tb09.211.2730	762	Gim5A protein ,glycosomal membrane protein	Glycosome biogenesis	200.829	33.3971	240	240	240	73.5218	0.166296	1.19504	1.19504	1.19504	0.366091
Tb09.211.2740	2691	Gim5B protein ,glycosomal membrane protein	Glycosome biogenesis	205.134	32.1437	240	240	240	67.4213	0.156696	1.16996	1.16996	1.16996	0.328669
Tb09.211.2750	836	hypothetical protein, conserved	Membrane	17.1393	15.3058	103.587	36.1985	20.6332	13.0864	0.893023	6.0438	2.11201	1.20385	0.763532
Tb09.211.2780	898	hypothetical protein, conserved	0	8.13305	10.1817	154.48	27.5103	7.80159	8.79306	1.25189	18.9941	3.38254	0.959245	1.08115
Tb09.211.2790	3831	hypothetical protein, conserved	0	12.8969	25.2358	64.0158	23.9086	16.2428	21.4483	1.95672	4.96364	1.85382	1.25943	1.66306
Tb09.211.2800	2009	hypothetical protein, conserved	0	12.448	19.687	28.6737	24.0882	16.1169	19.6024	1.58154	2.30348	1.9351	1.29474	1.57474
Tb09.211.2810	762	hypothetical protein, conserved	0	8.57669	13.1262	17.5895	12.406	8.68218	8.17166	1.53045	2.05085	1.44648	1.0123	0.952776
Tb09.211.2820	348	hypothetical protein, unlikely	unlikely	23.3624	#N/A	240	240	86.1206	9.72155	#N/A	10.2729	10.2729	3.68628	0.416119
Tb09.211.2830	996	iron-sulfur cluster assembly protein, putative	Mitochondrial pathway	23.3873	23.2867	240	240	26.4166	9.41734	0.9957	10.262	10.262	1.12953	0.402669
Tb09.211.2850	824	cyclophilin type peptidyl-prolyl cis-trans isomerase, putative	Chaperone	12.7924	19.1136	18.337	35.769	14.9667	11.6547	1.49414	1.43343	2.79612	1.16997	0.911065
Tb09.211.2860	951	hypothetical protein, conserved	0	9.09277	13.3071	16.4065	13.3792	12.0966	8.3376	1.46348	1.80435	1.47141	1.33036	0.916949
Tb09.211.2870	2294	DNA repair protein RAD2, putative	DNA synthesis, modification, repair	15.5661	28.6544	25.111	23.0154	12.9562	13.4998	1.84082	1.61318	1.47855	0.832335	0.867255
Tb09.211.2880	3097	hypothetical protein, conserved	0	11.4084	20.3365	60.6697	24.3828	12.4635	36.6838	1.78259	5.31798	2.13727	1.09249	3.21551
Tb09.211.2890	357	hypothetical protein, unlikely	unlikely	7.70467	#N/A	#N/A	15.8083	9.97823	9.62099	#N/A	#N/A	2.05178	1.29509	1.24872
Tb09.211.2900	1560	membrane transporter protein, putative	Transporter	9.61678	15.2502	11.6789	22.7398	10.8603	10.5189	1.58579	1.21443	2.36459	1.12931	1.09381
Tb09.211.2910	1560	hypothetical protein, conserved	0	9.65133	14.7572	11.7188	21.0785	10.7201	10.6514	1.52903	1.21422	2.184	1.11074	1.10362
Tb09.211.2920	1538	membrane transporter protein, putative	Transporter	9.20975	15.4369	19.9334	23.0243	10.3946	9.76046	1.67615	2.16438	2.5	1.12865	1.0598
Tb09.211.2940	1041	hypothetical protein, conserved	0	10.9249	13.755	92.4465	92.5867	13.83	18.1628	1.25905	8.46201	8.47485	1.26592	1.66252
Tb09.211.2950	2728	hypothetical protein, conserved	0	13.1571	22.2547	136.532	42.7192	13.4532	28.8529	1.69146	10.3771	3.24685	1.0225	2.19295
Tb09.211.2960	674	hypothetical protein, conserved	0	9.1555	13.2991	17.4871	18.1313	10.5608	18.8054	1.45258	1.91001	1.98038	1.15349	2.054
Tb09.211.2970	3992	structural maintenance of chromosome 1, putative	Chromatin	19.9707	17.6613	240	33.8127	18.1835	16.9485	0.884361	12.0176	1.69311	0.910507	0.848665
Tb09.211.2990	1792	zinc finger protein, putative ,predicted zinc finger protein	DNA synthesis, modification, repair	12.235	12.6463	24.0074	45.158	47.3505	21.5414	1.03362	1.96219	3.69088	3.87008	1.76064
Tb09.211.3000	1594	hypothetical protein, conserved	Mitochondrial translation	8.10089	13.3783	13.7983	13.0089	10.5428	14.1138	1.65146	1.70331	1.60586	1.30144	1.74226
Tb09.211.3010	3062	hypothetical protein, conserved	0	15.3418	21.4978	51.1722	20.9639	13.6216	16.0642	1.40125	3.33547	1.36645	0.887875	1.04708
Tb09.211.3020	1716	acyl transferase-like protein	Lipids & fatty acids	11.037	21.1701	12.3602	13.4687	9.44758	13.4442	1.9181	1.11988	1.22032	0.85599	1.2181
Tb09.211.3030	1457	hypothetical protein, conserved	0	8.96093	14.061	27.0585	25.3528	11.8728	16.1991	1.56914	3.01961	2.82926	1.32495	1.80775
Tb09.211.3040	2393	DNA-repair protein, putative	DNA synthesis, modification, repair	19.1186	16.0186	30.2342	28.0289	13.1681	36.0312	0.837853	1.5814	1.46605	0.688756	1.88461
Tb09.211.3050	682	hypothetical protein, conserved	0	36.7415	20.8865	240	240	68.2528	15.2229	0.568472	6.53213	6.53213	1.85765	0.414325
Tb09.211.3060	462	hypothetical protein, unlikely	unlikely	46.3396	#N/A	240	240	48.4331	14.6134	#N/A	5.17915	5.17915	1.04518	0.315355
Tb09.211.3070	1986	hypothetical protein, conserved	0	10.9064	16.0592	13.702	16.9647	9.08576	9.99227	1.47246	1.25633	1.55549	0.833068	0.916186
Tb09.211.3080	1707	hypothetical protein, conserved	0	13.4447	27.6218	10.7501	16.8307	8.92891	12.3758	2.05447	0.799583	1.25185	0.664122	0.920494
Tb09.211.3110	1236	hypothetical protein, conserved	0	15.4019	17.7515	81.0895	21.1787	11.5337	13.0356	1.15255	5.26491	1.37507	0.74885	0.846362
Tb09.211.3120	609	hypothetical protein, conserved	0	10.7356	17.2692	43.123	85.7337	23.0633	13.7517	1.60859	4.01681	7.9859	2.1483	1.28094
Tb09.211.3130	1765	hypothetical protein, conserved	0	14.751	15.9769	73.0283	30.0342	15.7407	24.0769	1.08311	4.95073	2.03608	1.06709	1.63222
Tb09.211.3140	3397	hypothetical protein, conserved	0	14.4427	20.6545	240	26.2892	13.8856	59.634	1.4301	16.6174	1.82024	0.961424	4.129
Tb09.211.3150	926	hypothetical protein, conserved	0	11.0822	12.4943	39.908	37.504	9.24594	9.26674	1.12742	3.60108	3.38415	0.834302	0.836179
Tb09.211.3160	6324	hypothetical protein, conserved	0	16.5349	46.5348	151.766	69.7701	22.4411	240	2.81435	9.17853	4.21957	1.3572	14.5148
Tb09.211.3170	1312	hypothetical protein, conserved	0	9.58829	15.2965	11.7251	12.8519	9.5484	10.9745	1.59533	1.22285	1.34037	0.99584	1.14458
Tb09.211.3180	1619	6-phosphogluconate dehydrogenase, decarboxylating	Pentose phosphate pathway	42.7078	17.9205	240	159.68	95.2712	21.6111	0.419607	5.61958	3.73888	2.23077	0.506023
Tb09.211.3200	1277	mitochondrial carrier protein, putative	Mitochondrial pathway	8.19901	11.2552	21.95	17.9394	15.224	12.6966	1.37276	2.67716	2.188	1.85681	1.54855
Tb09.211.3210	867	transport protein particle (TRAPP) subunit, putative	Vesicular transport	9.12954	14.2755	22.0271	21.1617	8.68741	11.7113	1.56366	2.41272	2.31793	0.951571	1.28279
Tb09.211.3230	1797	hypothetical protein, conserved	0	11.5901	16.8907	15.0519	14.237	13.0281	8.38113	1.45734	1.29868	1.22838	1.12407	0.723126
Tb09.211.3240	876	hypothetical protein, conserved ,leucine-rich repeat protein (LRRP), putative	LRRP	28.4786	#N/A	240	38.492	20.5524	30.8981	#N/A	8.42737	1.35161	0.721676	1.08496
Tb09.211.3270	630	60S ribosomal subunit protein L31, putative	Ribosome	199.169	39.0358	240	240	240	240	0.195994	1.20501	1.20501	1.20501	1.20501
Tb09.211.3280	588	60S ribosomal subunit protein L31, putative	Ribosome	199.833	44.2465	240	240	240	240	0.221418	1.201	1.201	1.201	1.201
Tb09.211.3300	889	Peroxin 19	Glycosome biogenesis	18.5529	19.675	240	240	28.7244	15.1945	1.06048	12.936	12.936	1.54824	0.818981
Tb09.211.3310	1413	replication factor C, subunit 3, putative	DNA synthesis, modification, repair	12.1371	15.9239	46.1714	35.5645	19.8144	9.97471	1.312	3.80414	2.93022	1.63255	0.821834
Tb09.211.3320	2598	hypothetical protein, conserved	0	12.223	13.1905	240	68.5015	23.6535	240	1.07915	19.6351	5.60431	1.93516	19.6351
Tb09.211.3330	1338	cystathione gamma lyase, putative	Amino acid metabolism	21.4389	22.5522	240	111.967	19.9534	24.0023	1.05193	11.1946	5.22263	0.930711	1.11957
Tb09.211.3340	690	hypothetical protein, conserved	0	15.3774	16.9903	37.2662	49.0716	14.1119	9.69097	1.10489	2.42344	3.19115	0.917705	0.630209
Tb09.211.3350	2244	hypothetical protein, conserved	0	16.2701	27.321	240	46.1312	13.592	18.0375	1.67921	14.751	2.83534	0.835399	1.10863
Tb09.211.3370	1683	RNA-binding protein, putative	RNA binding	44.1804	39.9628	240	34.8738	27.8398	240	0.904537	5.43227	0.789349	0.630138	5.43227
Tb09.211.3390	1498	hypothetical protein, conserved	0	9.22734	18.133	240	21.2834	8.93418	10.6162	1.96514	26.0097	2.30656	0.968229	1.15051
Tb09.211.3400	770	hypothetical protein, conserved	0	13.3449	11.1285	240	83.4128	14.3779	12.0158	0.833913	17.9844	6.25053	1.07741	0.900402
Tb09.211.3410	4440	protein kinase, putative	Protein kinase	16.6923	18.8414	240	44.4234	30.5667	117.403	1.12875	14.3779	2.66131	1.83119	7.03337
Tb09.211.3420	1624	riboflavin kinase, putative	Enzyme	9.06678	14.8643	240	73.0255	9.45126	11.0059	1.63942	26.4703	8.05418	1.04241	1.21387
Tb09.211.3430	779	hypothetical protein, conserved	0	14.5053	10.2759	9.87435	11.0971	9.07742	13.7825	0.70842	0.680739	0.765037	0.625799	0.950168
Tb09.211.3440	1273	class I transcription factor A, subunit 2	RNA synthesis I	11.3119	12.4063	240	26.4522	11.5883	13.2599	1.09675	21.2166	2.33844	1.02444	1.17221
Tb09.211.3460	1060	hypothetical protein, conserved	0	8.35491	13.7941	26.1079	13.1771	7.95233	9.55965	1.65102	3.12486	1.57717	0.951816	1.1442
Tb09.211.3470	1156	hypothetical protein, conserved	0	10.3446	11.3093	21.5261	23.4599	14.267	8.83905	1.09326	2.0809	2.26784	1.37918	0.854462
Tb09.211.3490	3951	hypothetical protein, conserved	0	12.5475	21.0542	240	28.136	15.6679	38.8921	1.67796	19.1273	2.24235	1.24868	3.09958
Tb09.211.3500	1714	hypothetical protein, conserved	0	14.3941	18.3833	240	240	22.7231	#N/A	1.27714	16.6735	16.6735	1.57863	#N/A
Tb09.211.3510	2278	ATP-dependent DEAD/H RNA helicase, putative	Translation	74.555	28.6641	240	79.9313	28.4195	34.9536	0.384468	3.2191	1.07211	0.381188	0.46883
Tb09.211.3530	1766	hypothetical protein, conserved	0	13.2515	15.6599	48.0839	91.472	39.7352	240	1.18175	3.62857	6.90277	2.99855	18.1112
Tb09.211.3540	1539	glycerol kinase, glycosomal	Glucose & glycerol	107.524	33.3144	240	240	240	32.7667	0.309833	2.23207	2.23207	2.23207	0.30474
Tb09.211.3550	1539	glycerol kinase, glycosomal	Glucose & glycerol	107.276	33.7783	240	240	240	32.3722	0.314872	2.23722	2.23722	2.23722	0.301765
Tb09.211.3560	1539	glycerol kinase, glycosomal	Glucose & glycerol	111.355	32.4482	240	240	240	30.7869	0.291394	2.15527	2.15527	2.15527	0.276475
Tb09.211.3570	1539	glycerol kinase, glycosomal	Glucose & glycerol	107.078	31.8612	240	240	240	30.4981	0.297553	2.24137	2.24137	2.24137	0.284823
Tb09.211.3590	1539	glycerol kinase, glycosomal	Glucose & glycerol	110.413	32.9014	240	240	240	30.578	0.297985	2.17365	2.17365	2.17365	0.276942
Tb09.211.3610	3760	ubiquitin-activating enzyme e1, putative	Ubiquitin & proteasome	165.915	55.9831	240	240	240	240	0.337419	1.44652	1.44652	1.44652	1.44652
Tb09.211.3620	1376	nucleic acid binding protein, putative ,predicted zinc finger protein	Ubiquitin & proteasome	9.34363	20.7596	11.6864	14.9447	8.62614	8.07879	2.22179	1.25073	1.59945	0.923211	0.86463
Tb09.211.3630	830	hypothetical protein, conserved	0	8.77784	11.8445	38.5758	16.6278	9.92525	9.3135	1.34937	4.39468	1.8943	1.13072	1.06102
Tb09.211.3640	738	prenyl protein specific carboxyl methyltransferase	Prenylation	9.03711	9.75953	17.0051	25.7358	7.95025	12.9887	1.07994	1.88169	2.84779	0.879733	1.43726
Tb09.211.3650	1458	phospholipase A2-like protein, putative	Lipids & fatty acids	35.1023	26.7575	240	240	19.917	26.8019	0.762272	6.83716	6.83716	0.567398	0.763539
Tb09.211.3660	1585	hypothetical protein, conserved	0	9.68947	24.2787	15.3537	12.7183	9.16434	7.1289	2.50568	1.58457	1.31259	0.945804	0.735736
Tb09.211.3670	1196	hypothetical protein, conserved ,predicted zinc finger protein	DNA synthesis, modification, repair	10.9454	17.5205	11.149	12.1108	8.67641	10.5994	1.60071	1.0186	1.10647	0.792699	0.968386
Tb09.211.3680	1795	chaperone protein DNAj, putative	Chaperone	11.1572	27.6952	240	27.8756	12.9765	13.3382	2.48227	21.5108	2.49844	1.16306	1.19548
Tb09.211.3690	1334	hypothetical protein, conserved	0	8.42739	13.4683	9.89111	17.0024	9.77732	10.3115	1.59816	1.17369	2.01751	1.16018	1.22357
Tb09.211.3700	1138	hypothetical protein, conserved	0	11.72	12.9976	240	66.3435	12.1693	14.7522	1.10901	20.4778	5.6607	1.03834	1.25872
Tb09.211.3720	3238	hypothetical protein, conserved	0	9.42662	24.1967	27.9529	30.8934	21.6678	240	2.56685	2.96532	3.27725	2.29858	25.4598
Tb09.211.3730	3438	hypothetical protein, conserved	0	11.3403	20.8371	21.335	22.4502	12.9413	52.5433	1.83744	1.88135	1.97969	1.14118	4.63334
Tb09.211.3740	2461	hypothetical protein, conserved	Glycan synthesis & metabolism	16.8194	18.8315	240	48.9713	26.0914	29.6133	1.11963	14.2693	2.9116	1.55127	1.76066
Tb09.211.3750	3387	hypothetical protein, conserved	0	11.7339	16.913	240	17.923	11.5816	25.6899	1.44138	20.4535	1.52745	0.987022	2.18937
Tb09.211.3760	1754	poly(ADP-ribose) glycohydrolase, putative	DNA synthesis, modification, repair	10.1075	14.7399	14.2224	15.7654	9.51339	14.3418	1.45832	1.40712	1.55978	0.941226	1.41894
Tb09.211.3770	442	dynein light chain, putative ,dynein Tctex2 family, putative	Cytoskeleton	16.2564	16.2142	74.9843	240	30.1879	11.3537	0.997402	4.6126	14.7634	1.85699	0.698416
Tb09.211.3780	1761	hypothetical protein, conserved	0	23.6558	13.2548	240	57.2937	18.1925	41.309	0.56032	10.1455	2.42197	0.769049	1.74625
Tb09.211.3800	1948	hypothetical protein, conserved	Mitochondrial translation	9.80083	19.8008	11.8747	12.2239	9.23154	8.19494	2.02031	1.2116	1.24723	0.941914	0.836147
Tb09.211.3810	442	hypothetical protein, conserved	0	7.80595	12.6545	28.6637	48.0564	9.0123	8.88982	1.62113	3.67203	6.15637	1.15454	1.13885
Tb09.211.3820	2109	protein kinase, putative	Protein kinase	10.8579	20.0586	25.0674	16.2116	9.26982	14.4616	1.84737	2.30867	1.49307	0.853737	1.33189
Tb09.211.3830	640	hypothetical protein, conserved	0	8.18562	12.9216	48.6855	48.6594	8.79336	11.386	1.57857	5.94768	5.9445	1.07424	1.39097
Tb09.211.3840	1816	hypothetical protein, conserved	RNA degradation	12.9039	14.6092	29.4723	17.6715	9.86977	20.6682	1.13216	2.28399	1.36947	0.764869	1.60171
Tb09.211.3850	1359	selenocysteine lyase	Amino acid metabolism	8.24473	15.72	10.546	14.9759	10.3515	7.37657	1.90667	1.27913	1.81642	1.25553	0.894702
Tb09.211.3860	1285	hypothetical protein, conserved	0	12.1613	16.6486	16.5648	23.0265	19.0907	16.5936	1.36898	1.36209	1.89342	1.56978	1.36446
Tb09.211.3870	2157	transporter, putative	Transporter	12.9308	27.0003	240	44.5469	16.3685	79.6093	2.08806	18.5603	3.44501	1.26585	6.15655
Tb09.211.3880	1769	hypothetical protein, conserved	0	18.6737	31.0666	240	240	33.9931	17.9446	1.66366	12.8523	12.8523	1.82037	0.960953
Tb09.211.3890	4046	hypothetical protein, conserved	0	13.6671	37.0437	69.7133	28.3546	16.0133	45.3009	2.71043	5.10081	2.07466	1.17167	3.31459
Tb09.211.3900	1905	hypothetical protein, conserved	0	8.39108	17.5357	14.9882	11.8972	8.73716	10.8272	2.0898	1.78621	1.41784	1.04124	1.29033
Tb09.211.3910	1146	hypothetical protein, conserved	0	8.77762	12.9872	18.2168	13.7078	11.0148	16.6953	1.47958	2.07537	1.56168	1.25488	1.90203
Tb09.211.3920	978	QA-SNARE protein putative	Vesicular transport	8.30325	11.983	39.2792	18.6892	8.2109	8.88542	1.44317	4.73058	2.25083	0.988877	1.07011
Tb09.211.3930	1338	hypothetical protein, conserved	0	16.255	12.4622	20.2252	27.225	13.623	10.7217	0.766669	1.24425	1.67487	0.838078	0.659594
Tb09.211.3940	3743	hypothetical protein, conserved	0	11.9238	33.6589	20.6857	18.2713	12.1375	19.2502	2.82283	1.73483	1.53234	1.01793	1.61444
Tb09.211.3950	1756	hypothetical protein, conserved	0	8.55257	21.0219	240	25.008	7.98786	10.8666	2.45796	28.0617	2.92403	0.933972	1.27057
Tb09.211.3955	461	hypothetical protein, conserved ,predicted heat shock factor binding protein	0	240	42.8363	240	240	240	15.6401	0.178485	1	1	1	0.065167
Tb09.211.3960	372	hypothetical protein, unlikely	unlikely	207.586	#N/A	240	240	240	15.4022	#N/A	1.15615	1.15615	1.15615	0.0741966
Tb09.211.3970	596	ankyrin repeat protein, putative	Cytoskeleton	25.3159	15.094	49.2623	240	240	23.6369	0.596226	1.94591	9.48022	9.48022	0.933682
Tb09.211.3980	1420	hypothetical protein, conserved	0	15.6613	17.0004	240	93.7543	21.4112	20.7226	1.08551	15.3244	5.98637	1.36714	1.32318
Tb09.211.3990	759	hypothetical protein, conserved	0	8.43479	13.5859	8.35307	8.56753	7.73357	7.92005	1.6107	0.990311	1.01574	0.916866	0.938973
Tb09.211.4000	1901	hypothetical protein, conserved	0	11.7832	14.5565	19.5128	24.8504	12.033	11.392	1.23536	1.65598	2.10897	1.0212	0.966804
Tb09.211.4010	2019	hypothetical protein, conserved	0	11.2352	16.2146	20.2766	15.6618	8.81182	10.2369	1.4432	1.80474	1.394	0.784307	0.911144
Tb09.211.4020	1063	TFIIF-stimulated CTD phosphatase, putative	Protein phosphatase	12.1292	13.8385	24.796	55.516	15.8497	11.069	1.14093	2.04432	4.57706	1.30674	0.91259
Tb09.211.4070	614	hypothetical protein	0	14.5251	10.7873	240	230.412	13.4042	19.6536	0.742667	16.5231	15.863	0.922825	1.35307
Tb09.211.4090	591	hypothetical protein, unlikely	unlikely	15.7539	#N/A	35.2351	95.1483	15.0612	9.81413	#N/A	2.23659	6.03965	0.956028	0.622964
Tb09.211.4100	625	hypothetical protein, conserved	0	11.3189	17.5933	29.4125	26.668	10.6137	8.53601	1.55433	2.59852	2.35606	0.937697	0.754136
Tb09.211.4110	2094	NADPH--cytochrome p450 reductase, putative	Enzyme	10.009	19.8313	11.7753	18.1139	11.1557	9.91117	1.98134	1.17646	1.80976	1.11456	0.990222
Tb09.211.4120	1290	RNA-binding protein, putative	RNA binding	11.1418	19.7265	15.6248	13.9439	8.53485	9.51135	1.77049	1.40236	1.2515	0.766019	0.853662
Tb09.211.4130	1023	hypothetical protein, conserved	chaperone	9.44623	14.3235	9.8878	8.5254	8.68629	7.66488	1.51632	1.04675	0.902519	0.91955	0.811422
Tb09.211.4150	1581	hypothetical protein, conserved	0	14.5097	19.1626	12.658	10.2289	8.69227	11.8764	1.32068	0.872381	0.704966	0.599064	0.818513
Tb09.211.4155	315	hypothetical protein, conserved	Membrane	11.9867	15.4096	29.449	48.7272	10.7414	26.7709	1.28556	2.45681	4.06511	0.89611	2.23339
Tb09.211.4170	1633	hypothetical protein, conserved	0	12.8739	14.2842	52.262	29.7217	19.6779	17.965	1.10954	4.05952	2.30867	1.52851	1.39546
Tb09.211.4180	3690	hypothetical protein, conserved	0	11.0599	22.1114	32.5122	19.587	12.9715	49.9837	1.99923	2.93964	1.77099	1.17284	4.51935
Tb09.211.4190	1298	hypothetical protein, conserved	0	10.4217	13.8365	15.9746	19.8344	12.0954	11.6464	1.32767	1.53282	1.90319	1.1606	1.11752
Tb09.211.4200	1088	hypothetical protein, conserved	0	10.023	11.1479	20.9869	21.3108	11.422	20.1727	1.11224	2.09388	2.1262	1.13959	2.01265
Tb09.211.4210	5739	ubiquitin-protein ligase, putative	Ubiquitin & proteasome	20.1499	56.736	240	39.2349	34.2176	240	2.8157	11.9108	1.94716	1.69816	11.9108
Tb09.211.4220	363	hypothetical protein, unlikely	unlikely	125.261	#N/A	240	240	24.2884	17.7275	#N/A	1.916	1.916	0.193902	0.141524
Tb09.211.4240	1566	phosphoinositide-binding protein, putative	Enzyme	89.4242	41.0128	240	88.8542	62.0818	15.9323	0.458632	2.68384	0.993625	0.69424	0.178166
Tb09.211.4270	1872	ubiquitin carboxyl-terminal hydrolase, putative ,cysteine peptidase, Clan CA, family C19, putative	Ubiquitin & proteasome	17.6658	25.5845	240	41.7025	23.655	12.8046	1.44825	13.5856	2.36064	1.33903	0.724825
Tb09.211.4280	4924	hypothetical protein, conserved	0	20.3582	27.2446	240	41.5569	31.9173	240	1.33826	11.7888	2.04128	1.56778	11.7888
Tb09.211.4290	816	hypothetical protein, conserved	0	9.94997	12.8392	41.6044	36.8432	11.2355	7.88907	1.29037	4.18135	3.70285	1.1292	0.792874
Tb09.211.4300	2524	hypothetical protein, conserved	0	11.3053	19.0189	23.6844	13.011	11.4604	19.4233	1.68229	2.09498	1.15087	1.01372	1.71806
Tb09.211.4320	504	hypothetical protein, conserved	0	10.9849	15.7634	10.6571	18.7165	10.36	9.93598	1.43501	0.970155	1.70383	0.943115	0.904511
Tb09.211.4330	1605	aminopeptidase P, putative ,metallo-peptidase, Clan MG, Family M24	Protease or peptidase	8.96182	14.4767	27.9554	19.6494	9.57402	9.62099	1.61538	3.11939	2.19257	1.06831	1.07355
Tb09.211.4350	2585	ribonuclease, putative	RNA degradation	17.7661	13.495	240	110.344	28.7833	22.3628	0.759593	13.5089	6.21092	1.62013	1.25873
Tb09.211.4360	2820	hypothetical protein, conserved	0	12.4069	15.4347	19.3306	16.3207	12.213	15.9076	1.24404	1.55805	1.31545	0.984372	1.28216
Tb09.211.4370	519	hypothetical protein, conserved	0	11.7163	12.7203	10.5387	12.7188	7.98442	7.80346	1.08569	0.899491	1.08556	0.681478	0.666032
Tb09.211.4380	1202	hypothetical protein, conserved	0	12.9351	27.3886	13.6313	17.4625	11.202	10.0879	2.11739	1.05382	1.35001	0.866014	0.779891
Tb09.211.4390	2655	hypothetical protein, conserved	0	14.6463	12.0709	28.1722	83.2879	16.8605	25.697	0.824161	1.92349	5.6866	1.15117	1.7545
Tb09.211.4400	1546	hypothetical protein, conserved	Mitochondrial pathway	10.2199	13.399	30.2561	81.0886	13.5133	28.2065	1.31106	2.9605	7.93436	1.32225	2.75995
Tb09.211.4430	4483	helicase, putative	DNA synthesis, modification, repair	24.1583	35.9305	240	46.2688	15.3993	240	1.48729	9.93446	1.91523	0.63743	9.93446
Tb09.211.4440	6126	hypothetical protein, conserved	0	16.2893	38.1359	240	33.184	26.1977	40.7639	2.34116	14.7336	2.03717	1.60828	2.5025
Tb09.211.4450	1160	hypothetical protein, conserved	0	11.2527	25.3509	14.0831	18.1432	18.451	12.9446	2.25287	1.25153	1.61234	1.63969	1.15036
Tb09.211.4460	584	ADP-ribosylation factor, putative	Vesicular transport	25.5451	18.1385	240	240	54.9663	59.0031	0.710056	9.39514	9.39514	2.15173	2.30976
Tb09.211.4470	648	ADP-ribosylation factor, putative	Vesicular transport	25.0183	17.7484	240	240	52.2775	53.0327	0.709416	9.59298	9.59298	2.08957	2.11976
Tb09.211.4480	620	ADP-ribosylation factor, putative	Vesicular transport	25.2795	18.5562	240	240	49.5141	53.8577	0.734042	9.49386	9.49386	1.95867	2.13049
Tb09.211.4490	1097	ADP-ribosylation factor, putative	Vesicular transport	24.9055	17.5997	240	240	53.6098	51.872	0.706659	9.63643	9.63643	2.15253	2.08275
Tb09.211.4500	938	hypothetical protein, conserved	0	8.9968	17.5148	64.4211	17.4429	8.75121	10.4849	1.94678	7.16045	1.93879	0.972702	1.16541
Tb09.211.4510	1034	hypothetical protein, conserved	Mitochondrial translation	11.3919	20.1478	16.4817	12.767	8.23443	9.23404	1.7686	1.44679	1.12071	0.72283	0.810577
Tb09.211.4511	328	kinetoplastid membrane protein KMP-11	Membrane	240	50.0287	240	240	240	240	0.208453	1	1	1	1
Tb09.211.4512	328	kinetoplastid membrane protein KMP-11	Membrane	240	54.0089	240	240	240	240	0.225037	1	1	1	1
Tb09.211.4513	328	kinetoplastid membrane protein KMP-11	Membrane	240	53.1392	240	240	240	240	0.221413	1	1	1	1
Tb09.211.4520	1783	hypothetical protein, conserved	0	9.80216	19.0676	12.7307	12.869	10.9332	8.52042	1.94525	1.29876	1.31288	1.11539	0.869239
Tb09.211.4530	360	hypothetical protein, unlikely	unlikely	16.6394	#N/A	28.4362	39.6158	19.1197	9.36937	#N/A	1.70896	2.38084	1.14906	0.563082
Tb09.211.4540	1774	RNA-binding protein, putative	RNA binding	67.0111	45.3452	240	52.9403	52.2913	13.1416	0.676681	3.58149	0.790023	0.780337	0.196111
Tb09.211.4550	660	60S ribosomal protein L12, putative	Ribosome	84.5223	37.0254	128.292	240	240	240	0.438055	1.51784	2.83949	2.83949	2.83949
Tb09.211.4560	2283	hypothetical protein, conserved	0	10.652	19.7184	20.033	16.0704	10.1237	11.4986	1.85114	1.88068	1.50868	0.950406	1.07948
Tb09.211.4570	1281	short-chain dehydrogenase, putative	Enzyme	11.8675	16.5978	34.0063	19.8527	13.3576	13.3301	1.39859	2.8655	1.67287	1.12556	1.12324
Tb09.211.4580	1575	hypothetical protein, conserved	Mitochondrial translation	12.8572	17.3054	56.5241	23.7049	13.5058	12.9278	1.34597	4.3963	1.8437	1.05044	1.00549
Tb09.211.4600	1505	short-chain dehydrogenase, putative	Enzyme	11.2402	35.6977	11.8587	11.9886	9.45526	9.55851	3.17589	1.05502	1.06658	0.841198	0.850384
Tb09.211.4610	1135	vesicle-associated membrane protein, putative	Vesicular transport	17.2662	17.378	240	63.1788	16.4407	12.2611	1.00647	13.9	3.6591	0.952188	0.710122
Tb09.211.4630	982	hypothetical protein, conserved	0	12.8533	14.1163	82.9834	94.6859	14.8277	13.8083	1.09826	6.45618	7.36665	1.15361	1.0743
Tb09.211.4670	2153	hypothetical protein, conserved	0	20.2938	24.9646	240	34.4152	20.2837	10.2389	1.23016	11.8263	1.69585	0.999504	0.504536
Tb09.211.4680	1749	hypothetical protein, conserved	0	16.0977	27.7654	240	27.3098	15.8419	10.2604	1.72481	14.909	1.6965	0.984111	0.637383
Tb09.211.4690	1131	hypothetical protein, conserved	0	8.98817	12.4699	15.9494	32.6333	14.4607	9.88323	1.38737	1.77449	3.63069	1.60886	1.09958
Tb09.211.4700	1071	rieske iron-sulfur protein, mitochondrial precursor	Mitochondrial pathway	12.9429	18.936	240	42.3077	12.3171	10.0649	1.46304	18.543	3.26879	0.951647	0.777638
Tb09.211.4710	1968	hypothetical protein, conserved	0	11.4858	19.6459	12.3653	11.0923	9.83408	10.2027	1.71046	1.07657	0.965745	0.856198	0.888292
Tb09.211.4720	1188	chaperone protein DNAj, putative	Chaperone	8.64668	16.742	12.1124	10.2283	8.15655	8.29649	1.93624	1.40082	1.18292	0.943317	0.9595
Tb09.211.4730	4081	hypothetical protein, conserved	0	23.1951	20.3598	240	64.8443	27.028	71.3804	0.877763	10.347	2.7956	1.16525	3.07739
Tb09.211.4740	1275	hypothetical protein, conserved	Mitochondrial electron transport	16.4286	14.4105	25.2973	19.2755	10.1564	9.00658	0.877161	1.53983	1.17329	0.618214	0.548225
Tb09.211.4760	1817	metacaspase 5, putative	Protease or peptidase	12.5381	17.4504	112.854	39.9838	16.4712	10.0112	1.39179	9.00089	3.18899	1.31369	0.798466
Tb09.211.4770	721	hypothetical protein, conserved	0	9.83439	11.5125	14.4667	22.5581	12.3684	10.133	1.17063	1.47103	2.29379	1.25767	1.03036
Tb09.211.4780	2386	Nucleoporin	Nucleo-cytoplasmic transport	13.1377	24.1629	138.097	21.5929	13.6041	11.0255	1.83921	10.5116	1.64359	1.0355	0.839227
Tb09.211.4790	303	hypothetical protein, unlikely	unlikely	10.9651	#N/A	25.7064	5.86339	12.4721	8.4795	#N/A	2.34438	0.534731	1.13743	0.773316
Tb09.211.4800	2508	hypothetical protein, conserved	0	12.4466	21.4483	21.9456	18.5821	10.0037	12.1991	1.72323	1.76318	1.49295	0.803732	0.980116
Tb09.211.4810	5127	hypothetical protein, conserved	0	12.6634	48.3306	230.598	18.2158	20.7464	23.438	3.81655	18.2098	1.43846	1.6383	1.85085
Tb09.211.4820	1442	hypothetical protein, conserved	0	25.1182	32.6238	240	102.846	24.1326	16.8095	1.29881	9.55482	4.09448	0.960763	0.669216
Tb09.211.4830	2087	hypothetical protein, conserved	0	13.9105	13.4397	128.018	87.8666	23.5033	19.7735	0.966152	9.20296	6.31656	1.68961	1.42148
Tb09.211.4840	2532	mismatch repair protein PMS1, putative ,mismatch repair protein	DNA synthesis, modification, repair	9.71797	23.1	40.0821	16.1854	10.7455	8.27254	2.37704	4.12454	1.66551	1.10574	0.851262
Tb09.211.4850	450	60S ribosomal protein L26, putative	Ribosome	203.97	41.7749	38.6639	240	240	240	0.204809	0.189557	1.17665	1.17665	1.17665
Tb09.211.4860	1191	hypothetical protein ,leucine-rich repeat protein (LRRP), putative	LRRP	13.1165	#N/A	42.4815	24.6937	13.3405	14.7634	#N/A	3.23878	1.88264	1.01708	1.12556
Tb09.211.4870	1102	RNA 3'-terminal phosphate cyclase-like protein	RNA processing	10.1786	20.9038	8.54022	18.5131	9.96314	9.85169	2.0537	0.839036	1.81883	0.978831	0.967881
Tb09.211.4880	1340	cyclophilin-like protein, putative	Chaperone	9.86346	17.6305	11.4153	14.2913	10.2429	13.1941	1.78745	1.15733	1.44892	1.03847	1.33767
Tb09.211.4890	1050	casein kinase II, putative	Protein kinase	13.0646	23.3942	240	123.19	14.9821	15.2966	1.79065	18.3702	9.42926	1.14677	1.17084
Tb09.211.4900	806	hypothetical protein	0	10.2178	28.1724	12.1588	12.2886	9.39145	15.006	2.75718	1.18996	1.20267	0.919123	1.46861
Tb09.211.4910	3541	ubiquitin carboxyl-terminal hydrolase, putative ,cysteine peptidase, Clan CA, family C19, putative	Ubiquitin & proteasome	10.6241	18.459	28.7914	21.1185	14.815	20.4088	1.73747	2.71001	1.98779	1.39447	1.92099
Tb09.211.4920	1194	dynein-associated protein, putative	Cytoskeleton	32.968	19.9169	240	240	86.7594	27.4264	0.60413	7.27979	7.27979	2.63162	0.831911
Tb09.211.4940	525	hypothetical protein, unlikely ,Ingi-like sequence	0	25.0166	#N/A	76.6335	34.265	17.8251	18.6298	#N/A	3.0633	1.36969	0.71253	0.744695
Tb09.211.4950	564	hypothetical protein	0	40.2333	21.2174	73.9675	240	84.2218	31.7172	0.527359	1.83847	5.96521	2.09334	0.788333
Tb09.211.4960	4353	leucine-rich repeat protein (LRRP, pseudogene), putative ,leucine-rich repeat protein (LRRP), point mutation	LRRP	24.9202	#N/A	240	240	37.3064	240	#N/A	9.63074	9.63074	1.49704	9.63074
Tb09.211.4970	426	hypothetical protein, unlikely	unlikely	26.0257	#N/A	#N/A	23.2345	40.1077	6.75496	#N/A	#N/A	0.892753	1.54108	0.25955
Tb09.211.4980	3795	leucine-rich repeat protein (LRRP), putative	LRRP	19.2868	#N/A	240	51.6947	32.2017	18.6251	#N/A	12.4437	2.68031	1.66962	0.965693
Tb09.211.4990	2424	iron/ascorbate oxidoreductase family protein, putative	Mitochondrial pathway	36.3616	15.9994	240	133.895	34.7419	26.5267	0.440008	6.60037	3.68233	0.955455	0.729524
Tb09.211.5010	3351	SLACS retrotransposable element (part), putative	0	99.898	#N/A	240	240	25.037	20.0765	#N/A	2.40245	2.40245	0.250626	0.20097
Tb09.211.5015	1911	SLACS reverse transcriptase, putative	0	172.354	#N/A	240	240	36.8804	31.2119	#N/A	1.39248	1.39248	0.213981	0.181092
Tb09.244.2020	1449	nucleoside transporter 1, putative	Nucleotides	24.6827	19.3881	30.3067	240	15.8782	62.163	0.785492	1.22785	9.72339	0.64329	2.51848
Tb09.244.2060	1229	expression site-associated gene (ESAG) protein, putative ,expression site-associated gene 3 (ESAG3) protein, putative	ESAG	27.5827	#N/A	68.5434	81.1509	30.6029	17.8158	#N/A	2.48501	2.94209	1.1095	0.645905
Tb09.244.2070	831	small GTPase, putative ,GTP-binding protein, putative	Vesicular transport	9.80735	12.9882	20.68	19.6389	9.82089	11.3059	1.32434	2.10862	2.00247	1.00138	1.15279
Tb09.244.2120	1458	expression site-associated gene (ESAG) protein, putative ,expression site-associated gene 5 (ESAG5) protein, putative	ESAG	16.6646	#N/A	240	240	17.3029	22.636	#N/A	14.4018	14.4018	1.0383	1.35832
Tb09.244.2150	2118	hypothetical protein	0	45.7749	21.2614	240	240	85.6694	17.2892	0.464476	5.24304	5.24304	1.87153	0.3777
Tb09.244.2160	1694	hypothetical protein	0	119.371	19.2666	240	41.5363	112.417	10.5442	0.161401	2.01053	0.347959	0.941742	0.0883311
Tb09.244.2170	1792	hypothetical protein, conserved	0	23.4483	10.0799	240	#N/A	31.353	#N/A	0.42988	10.2353	#N/A	1.33711	#N/A
Tb09.244.2180	1773	retrotransposon hot spot (RHS) protein, putative ,retrotransposon hot spot protein 3 (RHS3), putative	RHS	38.7061	#N/A	240	120.348	22.5124	24.3025	#N/A	6.20057	3.10927	0.581624	0.627872
Tb09.244.2350	1308	expression site-associated gene 6 (ESAG6, pseudogene), putative ,expression site-associated gene 6 (ESAG6), fragment ,transferrin-binding protein, fragment ,transferrin-binding protein (pseudogene), putative	ESAG pseudogene	12.86	#N/A	24.9323	18.5174	8.1389	9.43603	#N/A	1.93876	1.43993	0.632887	0.733753
Tb09.244.2380	4660	expression site-associated gene 4 (ESAG4) protein, putative ,receptor-type adenylate cyclase, putative	ESAG	19.4079	#N/A	55.7537	240	36.9264	15.9959	#N/A	2.87274	12.3661	1.90265	0.824196
Tb09.244.2390	1623	hypothetical protein	0	14.4978	13.7041	44.2454	54.3862	16.6266	8.85161	0.945256	3.05187	3.75134	1.14684	0.610548
Tb09.244.2400	1190	BARP protein	Membrane	10.4888	17.8113	16.9486	13.3217	9.47711	11.342	1.69812	1.61587	1.27009	0.903545	1.08134
Tb09.244.2410	842	BARP protein	Membrane	11.492	16.0151	65.3984	46.8317	11.6891	12.8437	1.39358	5.69077	4.07515	1.01715	1.11762
Tb09.244.2420	1172	BARP protein	Membrane	12.2287	16.2746	46.8117	15.9896	10.2758	12.4244	1.33086	3.82803	1.30755	0.840305	1.016
Tb09.244.2430	1190	BARP protein	Membrane	12.1304	16.4867	22.8579	14.9552	10.1302	13.7212	1.35912	1.88435	1.23287	0.835106	1.13114
Tb09.244.2440	1190	BARP protein	Membrane	12.8457	17.2557	240	33.6544	10.7924	10.6124	1.34331	18.6833	2.61989	0.840157	0.826141
Tb09.244.2450	1388	BARP protein	Membrane	14.2357	13.3909	240	40.2425	15.0732	13.3799	0.940661	16.8591	2.82687	1.05883	0.939886
Tb09.244.2460	1520	BARP protein	Membrane	12.2734	17.9471	151.49	40.5432	12.0633	10.7147	1.46228	12.343	3.30334	0.982884	0.873
Tb09.244.2470	1244	BARP protein	Membrane	11.4302	19.3751	221.503	34.8714	11.2171	12.6504	1.69508	19.3787	3.05081	0.981355	1.10675
Tb09.244.2480	824	BARP protein	Membrane	11.8692	19.3806	240	54.2078	12.7078	10.1902	1.63286	20.2205	4.56712	1.07066	0.858542
Tb09.244.2490	929	BARP protein	Membrane	11.5963	15.7356	240	44.3526	13.925	10.9205	1.35695	20.6962	3.82472	1.20081	0.941725
Tb09.244.2500	929	BARP protein	Membrane	10.5732	17.9461	240	240	13.788	19.1571	1.69733	22.699	22.699	1.30406	1.81186
Tb09.244.2510	839	BARP protein	Membrane	11.4452	17.7353	240	66.0846	11.6158	11.3951	1.54959	20.9696	5.77402	1.01491	0.995625
Tb09.244.2520	839	BARP protein	Membrane	12.1287	15.3369	240	64.1128	12.3863	10.445	1.26452	19.7878	5.28606	1.02124	0.861183
Tb09.244.2530	947	BARP protein	Membrane	15.4422	19.5494	240	240	12.7276	23.6439	1.26597	15.5418	15.5418	0.824207	1.53112
Tb09.244.2540	1416	ADP-ribosylation factor GTPase activating protein, putative	Vesicular transport	20.017	39.3794	240	30.0681	15.3652	9.13801	1.96729	11.9898	1.50213	0.767608	0.456512
Tb09.244.2550	1930	hypothetical protein	0	18.66	17.3537	240	81.2138	19.1356	37.1452	0.929996	12.8617	4.35229	1.02549	1.99063
Tb09.244.2560	3826	kinesin, putative	Cytoskeleton	15.6595	28.6685	240	18.4026	21.0277	23.5314	1.83074	15.3262	1.17517	1.34281	1.5027
Tb09.244.2570	3378	calcium motive p-type ATPase, putative	Ion channel or pump	42.9277	39.5952	240	29.6018	26.874	23.1222	0.92237	5.5908	0.689573	0.626029	0.538632
Tb09.244.2580	2272	hypothetical protein, conserved	0	21.8159	18.5595	240	27.8378	20.9823	14.5478	0.850732	11.0012	1.27604	0.961794	0.666844
Tb09.244.2590	422	60S ribosomal protein L32	Ribosome	240	43.4168	75.5962	240	240	240	0.180903	0.314984	1	1	1
Tb09.244.2600	9147	ankyrin-repeat protein, putative	Cytoskeleton	28.4194	59.5028	240	79.2537	38.7002	39.5732	2.09374	8.44493	2.78872	1.36175	1.39247
Tb09.244.2610	348	hypothetical protein, unlikely	unlikely	7.7005	#N/A	#N/A	#N/A	10.93	9.49989	#N/A	#N/A	#N/A	1.41938	1.23367
Tb09.244.2620	1352	NADH-ubiquinone oxidoreductase complex I subunit, putative ,NDUFA9 subunit, putative	Mitochondrial electron transport	8.96304	16.1687	70.0228	27.1274	9.50301	9.90723	1.80393	7.81239	3.02658	1.06024	1.10534
Tb09.244.2630	849	40S ribosomal protein S6, putative	Ribosome	221.386	240	151.947	240	240	240	1.08408	0.686345	1.08408	1.08408	1.08408
Tb09.244.2640	2163	hypothetical protein, conserved	0	10.414	29.1082	12.9546	11.6912	9.06281	7.43943	2.7951	1.24396	1.12264	0.870252	0.714367
Tb09.244.2650	2858	hypothetical protein, conserved	0	13.408	27.7044	23.3461	22.6541	10.2587	14.99	2.06625	1.7412	1.68959	0.765113	1.11799
Tb09.244.2660	4204	hypothetical protein, conserved	0	19.5644	106.049	240	29.3047	16.4833	20.7396	5.42053	12.2672	1.49786	0.842515	1.06007
Tb09.244.2670	1648	hypothetical protein, conserved	Mitochondrial pathway	10.9733	15.8761	12.4388	27.4636	11.764	19.3616	1.44679	1.13354	2.50275	1.07206	1.76442
Tb09.244.2680	1018	hypothetical protein, conserved	0	12.6463	15.7932	17.5481	17.7898	14.8295	9.12093	1.24883	1.3876	1.40671	1.17263	0.721232
Tb09.244.2700	784	hypothetical protein, conserved	0	8.36676	23.4747	13.5954	19.3262	11.598	8.05256	2.80571	1.62493	2.30988	1.3862	0.962447
Tb09.244.2710	2066	hypothetical protein, conserved	0	18.9482	15.7423	30.432	94.4763	15.7278	12.1214	0.830809	1.60606	4.98603	0.830041	0.639713
Tb09.244.2720	666	ribosomal protein L15, putative	Ribosome	108.205	66.8179	67.5603	240	240	240	0.617511	0.624372	2.21801	2.21801	2.21801
Tb09.244.2725	345	ribosomal protein L36, putative	Ribosome	95.29	42.6567	50.6496	240	240	240	0.447651	0.531531	2.51863	2.51863	2.51863
Tb09.244.2730	946	60S ribosomal protein L5, putative	Ribosome	87.3631	122.843	80.3522	240	240	240	1.40611	0.91975	2.74715	2.74715	2.74715
Tb09.244.2740	960	60S ribosomal protein L5, putative	Ribosome	86.7934	133.436	76.0632	240	240	240	1.5374	0.876371	2.76519	2.76519	2.76519
Tb09.244.2750	1353	hypothetical protein, conserved	0	10.1619	12.1465	18.2782	29.9534	13.364	12.2578	1.1953	1.7987	2.94762	1.31511	1.20625
Tb09.244.2760	699	cytosolic coat protein, putative	Vesicular transport	23.0535	24.4785	172.381	240	42.5093	22.337	1.06181	7.47742	10.4106	1.84394	0.968921
Tb09.244.2770	554	hypothetical protein, conserved	0	13.2574	14.0312	20.6968	32.2134	8.01078	10.6563	1.05837	1.56116	2.42985	0.604252	0.803806
Tb09.244.2780	2374	hypothetical protein, conserved	0	15.9702	23.1269	240	39.4649	14.3391	9.88449	1.44813	15.028	2.47116	0.897867	0.618934
Tb09.244.2790	805	rRNA processing protein, putative	rRNA-tRNA processing	8.34889	14.6804	11.1046	13.3993	9.52488	11.5536	1.75836	1.33006	1.60492	1.14086	1.38385
Tb09.244.2800	1424	trypanin-related protein, putative	Cytoskeleton	11.5968	13.2237	240	28.6289	10.9011	21.5071	1.14029	20.6954	2.4687	0.940011	1.85458
Tb09.244.2810	843	hypothetical protein, conserved	0	10.2358	16.1043	11.5658	18.0107	7.0099	11.3313	1.57334	1.12994	1.75958	0.684843	1.10703
Tb09.244.2820	1618	DNA polymerase epsilon subunit b, putative	DNA synthesis, modification, repair	11.1579	25.0986	12.3553	12.7268	9.47105	8.96945	2.24939	1.10731	1.14061	0.848816	0.803862
Tb09.244.2830	1981	hypothetical protein, conserved	0	12.7053	14.2608	14.5932	16.8233	16.2313	13.2082	1.12243	1.14859	1.32412	1.27752	1.03958
Tb09.244.2840	642	hypothetical protein, conserved	Mitochondrial pathway	27.5814	22.4701	240	240	240	36.2961	0.814682	8.70151	8.70151	8.70151	1.31596
Tb09.244.2850	779	hypothetical protein, conserved	0	9.90787	18.6046	79.835	181.849	11.187	10.5447	1.87777	8.05774	18.354	1.1291	1.06427
Tb09.244.2860	464	hypothetical protein, conserved	0	7.66673	11.0765	40.375	15.8673	6.33818	9.00821	1.44475	5.26626	2.06964	0.826713	1.17497
Tb09.244.2870	441	hypothetical protein, unlikely	unlikely	15.1917	#N/A	21.2839	37.0722	11.1689	9.39861	#N/A	1.40102	2.44029	0.735196	0.618666
Tb09.244.2890	1380	SLACS reverse transcriptase, putative	0	161.094	#N/A	240	169.067	27.1795	20.3689	#N/A	1.48981	1.04949	0.168718	0.126441
Tb09.354.0080	839	expression site-associated gene (ESAG, pseudogene), putative ,expression site-associated gene 3 (ESAG3), fragment	ESAG pseudogene	173.563	#N/A	#N/A	#N/A	65.6303	#N/A	#N/A	#N/A	#N/A	0.378134	#N/A
Tb09.v1.0130	1998	hypothetical protein, conserved	0	11.6947	18.1603	17.5895	33.2204	13.4911	13.8015	1.55286	1.50405	2.84063	1.15361	1.18014
Tb09.v1.0140	447	hypothetical protein, unlikely	unlikely	14.0839	#N/A	14.2227	30.2183	23.267	32.8163	#N/A	1.00986	2.1456	1.65203	2.33006
Tb09.v1.0150	1998	hypothetical protein, conserved	0	11.6052	18.0362	17.2142	34.8939	13.1923	13.4936	1.55415	1.48332	3.00676	1.13676	1.16272
Tb09.v1.0160	447	hypothetical protein, unlikely	unlikely	13.8629	#N/A	15.1576	34.2779	22.3612	32.8783	#N/A	1.09339	2.47264	1.61302	2.37168
Tb09.v1.0180	345	hypothetical protein, unlikely	unlikely	22.6715	#N/A	240	63.4011	43.4563	12.7241	#N/A	10.586	2.79651	1.91679	0.56124
Tb09.v1.0270	387	hypothetical protein, unlikely	unlikely	10.9662	#N/A	19.86	31.0525	13.3025	8.33015	#N/A	1.81101	2.83165	1.21304	0.759618
Tb09.v1.0320	1419	expression site-associated gene 2 (ESAG2) protein, putative	ESAG	23.9349	#N/A	#N/A	#N/A	32.1484	#N/A	#N/A	#N/A	#N/A	1.34316	#N/A
Tb09.v1.0350	1757	lipid-like atypical dual specificity phosphatase, putative	Lipids & fatty acids	11.7342	13.9961	23.7693	25.1314	20.5273	10.7135	1.19276	2.02564	2.14172	1.74936	0.913017
Tb09.v1.0370	2499	hypothetical protein, conserved	0	12.4665	25.2101	20.4149	21.5756	11.8738	16.242	2.02222	1.63758	1.73068	0.952456	1.30285
Tb09.v1.0380	983	spermidine synthase	Redox pathways	33.6708	56.7109	240	240	171.406	33.1206	1.68428	7.12784	7.12784	5.09066	0.983659
Tb09.v1.0390	828	hypothetical protein, conserved	0	10.2129	12.8427	21.5191	34.513	10.2057	10.6794	1.2575	2.10705	3.37936	0.999298	1.04568
Tb09.v1.0410	2434	hypothetical protein, conserved	0	14.3825	26.4544	14.0241	19.8792	11.2025	19.5247	1.83934	0.975078	1.38217	0.778892	1.35753
Tb09.v1.0420	657	hypothetical protein, conserved	Mitochondrial biogenesis	14.8915	17.3755	240	240	16.5739	11.2859	1.1668	16.1166	16.1166	1.11298	0.757874
Tb09.v1.0490	273	hypothetical protein, conserved	0	38.3303	33.849	240	240	140.494	#N/A	0.88309	6.26137	6.26137	3.66535	#N/A
Tb09.v1.0525	273	hypothetical protein, conserved	0	27.4152	27.4631	240	240	100.809	#N/A	1.00175	8.75427	8.75427	3.67712	#N/A
Tb09.v1.0590	261	hypothetical protein, unlikely	unlikely	15.5736	#N/A	240	240	20.1363	35.4529	#N/A	15.4107	15.4107	1.29298	2.27648
Tb09.v1.0600	210	hypothetical protein, unlikely	unlikely	11.5527	#N/A	15.8193	#N/A	#N/A	#N/A	#N/A	1.36931	#N/A	#N/A	#N/A
Tb09.v1.0640	445	60S ribosomal protein L27a ,60S ribosomal protein L28 ,60S ribosomal protein L29	Ribosome	204.308	40.547	50.3201	240	240	240	0.19846	0.246295	1.1747	1.1747	1.1747
Tb09.v1.0650	1686	hypothetical protein, conserved	0	20.6904	25.801	240	240	19.0106	18.0621	1.247	11.5996	11.5996	0.91881	0.872968
Tb09.v1.0720	216	hypothetical protein, unlikely	unlikely	11.4069	#N/A	8.20217	26.17	17.1679	20.0107	#N/A	0.719051	2.29422	1.50504	1.75426
Tb09.v2.0010	4152	invariant surface glycoprotein 100 (pseudogene), putative ,invariant surface glycoprotein 100, point mutation	Membrane	19.8537	#N/A	240	32.0628	27.7562	27.286	#N/A	12.0884	1.61496	1.39804	1.37436
Tb09.v2.0020	1429	hypothetical protein, conserved	0	15.0998	21.9348	50.8384	52.1918	14.2576	17.5379	1.45265	3.36682	3.45646	0.944223	1.16147
Tb09.v2.0030	1456	hypothetical protein, conserved	0	18.0707	26.7913	79.3951	95.2027	16.6523	18.9315	1.48258	4.39357	5.26833	0.921503	1.04763
Tb09.v2.0050	324	hypothetical protein, unlikely	unlikely	28.8442	#N/A	24.0644	240	46.4782	61.7464	#N/A	0.834287	8.32056	1.61135	2.14069
Tb09.v4.0009	3729	#N/A	GRESAG	18.3698	#N/A	88.286	199.586	20.4566	28.1462	#N/A	4.80604	10.8649	1.1136	1.5322
Tb09.v4.0010	1356	#N/A	VSG	11.2101	#N/A	21.5614	28.4743	8.15542	9.23528	#N/A	1.92339	2.54005	0.727506	0.823835
Tb09.v4.0014	687	#N/A	0	122.569	#N/A	240	#N/A	139.004	6.68345	#N/A	1.95808	#N/A	1.13409	0.0545282
Tb09.v4.0015	699	#N/A	0	55.786	#N/A	240	240	69.1545	11.8175	#N/A	4.30215	4.30215	1.23964	0.211836
Tb09.v4.0016	1458	#N/A	ESAG	16.4438	#N/A	240	240	16.5103	33.0285	#N/A	14.5952	14.5952	1.00404	2.00857
Tb09.v4.0017	831	#N/A	Vesicular transport	9.8036	#N/A	21.0601	24.0227	9.50981	11.6717	#N/A	2.1482	2.4504	0.970033	1.19055
Tb09.v4.0018	1188	#N/A	ESAG	25.9833	#N/A	68.5288	63.737	27.4493	20.5731	#N/A	2.63741	2.45299	1.05642	0.791779
Tb09.v4.0041	1477	#N/A	LRRP	35.4017	#N/A	#N/A	#N/A	29.6273	#N/A	#N/A	#N/A	#N/A	0.836889	#N/A
Tb09.v4.0042	603	#N/A	LRRP	29.6489	#N/A	#N/A	#N/A	103.572	#N/A	#N/A	#N/A	#N/A	3.49329	#N/A
Tb10_snoRNA_0034:snoRNA	65	snoRNA	SNO	26.0653	#N/A	60.536	#N/A	30.5426	240	#N/A	2.32248	#N/A	1.17177	9.20765
Tb10_snoRNA_0049:snoRNA	65	snoRNA	SNO	27.2128	#N/A	47.5447	#N/A	25.402	240	#N/A	1.74714	#N/A	0.933458	8.81937
Tb10.v4.0032	1308	#N/A	ESAG	19.3835	#N/A	61.5918	52.3328	24.1625	18.3131	#N/A	3.17753	2.69986	1.24655	0.944773
Tb10.v4.0033	1719	#N/A	RNA binding	28.986	#N/A	240	44.5904	31.884	18.5965	#N/A	8.27987	1.53835	1.09998	0.641571
Tb10.v4.0034	864	#N/A	0	7.76376	#N/A	10.4125	12.9645	9.17135	8.37294	#N/A	1.34117	1.66987	1.1813	1.07846
Tb10.v4.0035	774	#N/A	Chaperone	25.7863	#N/A	51.6418	240	69.8803	21.2066	#N/A	2.00269	9.30727	2.70998	0.822398
Tb10.v4.0036	984	#N/A	Amino acid metabolism	10.2805	#N/A	14.1732	13.9683	6.29371	9.51229	#N/A	1.37866	1.35872	0.612202	0.92528
Tb10.v4.0037	3368	#N/A	0	11.0778	#N/A	24.1583	16.3786	9.62404	12.5175	#N/A	2.18078	1.47851	0.868767	1.12996
Tb10.v4.0038	1842	#N/A	DNA synthesis, modification, repair	11.0658	#N/A	15.6598	14.369	14.195	9.50075	#N/A	1.41515	1.2985	1.28278	0.858567
Tb10.v4.0039	2973	#N/A	0	10.6226	#N/A	32.4884	25.9019	13.4983	22.8619	#N/A	3.05843	2.43838	1.27071	2.15219
Tb10.v4.0040	975	#N/A	RNA processing	10.6577	#N/A	11.0911	29.4503	13.9968	10.4366	#N/A	1.04067	2.76329	1.3133	0.979254
Tb10.v4.0041	1077	#N/A	0	8.30326	#N/A	240	53.3085	11.2391	9.88074	#N/A	28.9043	6.42019	1.35357	1.18998
Tb10.v4.0042	688	#N/A	0	25.1975	#N/A	240	240	35.0275	28.811	#N/A	9.52475	9.52475	1.39012	1.14341
Tb10.v4.0043	1107	#N/A	Amino acid metabolism	9.61996	#N/A	16.1518	18.238	10.3249	16.4078	#N/A	1.67899	1.89585	1.07328	1.7056
Tb10.v4.0044	1992	#N/A	0	11.6402	#N/A	93.5469	26.8043	13.6226	50.5563	#N/A	8.03653	2.30273	1.1703	4.34324
Tb10.v4.0045	888	#N/A	Cell cycle	10.9508	#N/A	69.644	240	18.2469	13.2593	#N/A	6.35969	21.9161	1.66626	1.21081
Tb10.v4.0046	1452	#N/A	Transporter	10.356	#N/A	10.2476	12.1135	9.65004	10.97	#N/A	0.989531	1.1697	0.931828	1.05929
Tb10.v4.0052	14643	#N/A	Cytoskeleton	167.187	#N/A	240	100.104	42.5383	240	#N/A	1.43552	0.598752	0.254435	1.43552
Tb11_snoRNA_0002	101	#N/A	SNO	21.1166	#N/A	240	#N/A	18.757	240	#N/A	11.3655	#N/A	0.888259	11.3655
Tb11_snoRNA_0008	101	#N/A	SNO	21.5685	#N/A	240	#N/A	20.099	240	#N/A	11.1274	#N/A	0.93187	11.1274
Tb11_snoRNA_0020	101	#N/A	SNO	21.1166	#N/A	240	#N/A	18.757	240	#N/A	11.3655	#N/A	0.888259	11.3655
Tb11_snoRNA_0026	101	#N/A	SNO	21.2115	#N/A	240	#N/A	18.6895	240	#N/A	11.3146	#N/A	0.881105	11.3146
Tb11_snoRNA_0039	75	#N/A	SNO	112.648	#N/A	45.9517	#N/A	#N/A	240	#N/A	0.407924	#N/A	#N/A	2.13054
Tb11_snoRNA_0041	269	H/ACA snoRNA, TB11Cs2H1 ,snoRNA TBR17	SNO	141.435	#N/A	39.9689	240	240	240	#N/A	0.282596	1.69689	1.69689	1.69689
Tb11_snoRNA_0047	75	#N/A	SNO	9.87592	#N/A	#N/A	38.1109	9.16458	#N/A	#N/A	#N/A	3.85897	0.927972	#N/A
Tb11.01.0010	1827	DNA polymerase kappa, putative ,DNA polymerase IV, putative	DNA synthesis, modification, repair	10.8858	10.2195	42.4323	68.0656	13.7423	42.8699	0.938787	3.89795	6.25268	1.2624	3.93814
Tb11.01.0020	1833	DNA polymerase kappa, putative ,DNA polymerase IV, putative	DNA synthesis, modification, repair	10.7924	10.2767	52.3503	55.3355	12.4751	27.2149	0.952211	4.85066	5.12726	1.15591	2.52167
Tb11.01.0030	1830	DNA polymerase kappa, putative ,DNA polymerase IV, putative	DNA synthesis, modification, repair	11.3114	10.4245	48.4468	35.4387	12.5317	49.1915	0.921594	4.28301	3.13301	1.10789	4.34885
Tb11.01.0040	1830	DNA polymerase kappa, putative ,DNA polymerase IV, putative	DNA synthesis, modification, repair	10.7964	10.4048	37.4871	42.9222	12.6501	51.1002	0.96373	3.4722	3.97562	1.1717	4.7331
Tb11.01.0050	1830	DNA polymerase kappa, putative ,DNA polymerase IV, putative	DNA synthesis, modification, repair	11.414	9.8332	53.4718	43.5996	12.6518	44.4142	0.8615	4.68473	3.81982	1.10844	3.89119
Tb11.01.0060	601	DNA polymerase kappa, putative ,DNA polymerase IV, putative	DNA synthesis, modification, repair	12.1486	11.53	32.5608	240	19.3281	240	0.949077	2.68021	19.7554	1.59097	19.7554
Tb11.01.0070	705	hypothetical protein, conserved	0	13.8197	15.9061	21.0032	24.7946	11.5745	37.9741	1.15097	1.5198	1.79415	0.837533	2.74782
Tb11.01.0080	1832	DNA polymerase kappa, putative ,DNA polymerase IV, putative	DNA synthesis, modification, repair	10.926	10.2011	41.0915	42.5936	12.586	58.012	0.933653	3.76089	3.89838	1.15193	5.30954
Tb11.01.0090	624	hypothetical protein, conserved ,zinc finger protein family member, putative	RNA binding	21.4386	55.573	240	25.9176	21.335	#N/A	2.59219	11.1947	1.20892	0.995164	#N/A
Tb11.01.0100	1653	amastin-like protein	Enzyme	15.4012	15.699	27.9282	25.9358	14.3153	12.2589	1.01934	1.81338	1.68401	0.929496	0.79597
Tb11.01.0110	1562	hypothetical protein, conserved	0	14.0144	11.3362	32.6862	28.2396	13.1061	24.902	0.808899	2.33233	2.01504	0.935185	1.77689
Tb11.01.0120	1446	haloacid dehalogenase-like hydrolase, putative	Enzyme	40.5593	15.9518	240	240	54.6306	141.237	0.393296	5.91726	5.91726	1.34693	3.48225
Tb11.01.0130	942	hypothetical protein, conserved	0	12.7762	18.0982	72.845	52.6913	24.0759	9.56728	1.41655	5.7016	4.12416	1.88442	0.748833
Tb11.01.0135	559	hypothetical protein, conserved	0	10.0712	20.09	11.8813	19.0477	11.3455	7.81116	1.99479	1.17972	1.8913	1.12652	0.775592
Tb11.01.0140	2037	hypothetical protein, conserved	0	11.4079	20.3572	18.7687	12.9449	10.8161	11.14	1.78448	1.64523	1.13473	0.948119	0.976516
Tb11.01.0150	1942	hypothetical protein, conserved	Mitochondrial RNA	11.1371	17.1718	14.7627	17.7055	10.5146	20.8505	1.54187	1.32555	1.58979	0.944108	1.87218
Tb11.01.0160	1524	hypothetical protein, conserved	0	13.1919	16.8421	33.8055	20.6115	13.7873	16.4696	1.2767	2.5626	1.56244	1.04513	1.24846
Tb11.01.0170	1946	NADPH--cytochrome p450 reductase, putative	Enzyme	25.2671	20.9805	240	67.8817	26.5022	14.9818	0.830348	9.49853	2.68657	1.04888	0.592937
Tb11.01.0180	2758	hypothetical protein, conserved	0	12.729	19.1248	240	29.9712	17.5135	19.3736	1.50246	18.8546	2.35457	1.37588	1.52201
Tb11.01.0200	1680	katanin, putative ,serine peptidase, Clan SJ, family S16, putative	Protease or peptidase	12.7566	19.5708	58.8655	20.6814	11.1978	40.5955	1.53417	4.61453	1.62124	0.877808	3.18232
Tb11.01.0220	1305	hypothetical protein, conserved	0	27.5516	18.5776	240	240	16.442	17.3299	0.674285	8.71092	8.71092	0.59677	0.628999
Tb11.01.0230	1500	hypothetical protein, conserved	0	17.1336	14.7689	24.22	17.5805	11.5029	11.0012	0.861986	1.4136	1.02609	0.671367	0.642085
Tb11.01.0240	1364	class I transcription factor A, subunit 4	RNA synthesis I	23.1894	13.8734	240	240	18.4237	19.216	0.598265	10.3495	10.3495	0.794487	0.828654
Tb11.01.0250	2226	hypothetical protein, conserved	0	10.489	19.5083	18.2075	15.8964	10.8012	12.5277	1.85987	1.73586	1.51553	1.02976	1.19436
Tb11.01.0260	2798	exosome complex exonuclease RRP44, putative	RNA degradation	10.2273	14.2279	36.7908	20.5763	10.9887	18.3382	1.39117	3.5973	2.01189	1.07444	1.79306
Tb11.01.0270	1481	hypothetical protein, conserved	0	13.6226	15.1039	15.0085	38.153	29.8554	26.0473	1.10874	1.10173	2.80072	2.19161	1.91207
Tb11.01.0280	2418	hypothetical protein, conserved	0	10.2949	19.7307	15.2247	17.8068	12.2147	11.9858	1.91655	1.47887	1.72968	1.18648	1.16425
Tb11.01.0290	1387	carbonic anhydrase-like protein	Enzyme	13.3058	18.7969	70.4135	218.175	41.1363	13.2648	1.41269	5.29195	16.397	3.09161	0.996919
Tb11.01.0300	555	hypothetical protein, conserved	0	11.6526	19.0566	11.848	22.4168	13.0592	11.101	1.63539	1.01677	1.92375	1.12071	0.952659
Tb11.01.0310	2645	hypothetical protein, conserved	0	13.9567	21.6563	49.3282	46.0128	13.9176	167.587	1.55167	3.53437	3.29682	0.997194	12.0076
Tb11.01.0320	1194	hypothetical protein, conserved	0	13.2612	14.3029	18.4881	39.2556	14.8421	21.1382	1.07855	1.39415	2.96018	1.11921	1.59398
Tb11.01.0330	930	aurora B kinase	Cell cycle	19.4969	14.3047	240	240	21.2406	13.1817	0.733689	12.3096	12.3096	1.08943	0.67609
Tb11.01.0340	4050	RAD50 DNA repair-like protein	DNA synthesis, modification, repair	26.1149	15.5156	240	64.0518	40.5307	240	0.594126	9.19014	2.45269	1.55201	9.19014
Tb11.01.0355	387	ribosomal protein S26, putative	Ribosome	185.694	49.6321	240	240	26.752	240	0.26728	1.29245	1.29245	0.144065	1.29245
Tb11.01.0360	2244	RAD51 protein	DNA synthesis, modification, repair	12.463	18.6394	240	240	13.8162	11.0753	1.49557	19.2569	19.2569	1.10858	0.888654
Tb11.01.0370	973	hypothetical protein, conserved	0	9.34929	13.8627	11.6229	16.5513	8.86835	10.2108	1.48276	1.24319	1.77032	0.948558	1.09215
Tb11.01.0380	2267	protein kinase, putative	Protein kinase	13.2168	18.8576	80.8402	39.3988	27.2926	19.3746	1.42679	6.11646	2.98096	2.06499	1.4659
Tb11.01.0390	12557	dynein heavy chain, putative	Cytoskeleton	21.9731	33.6263	240	28.3632	24.5756	240	1.53034	10.9225	1.29082	1.11844	10.9225
Tb11.01.0400	4067	protein kinase, putative	Protein kinase	14.2792	35.0235	60.1588	21.3746	19.1647	42.7221	2.45276	4.21304	1.49691	1.34214	2.99191
Tb11.01.0410	927	ER lumen retaining receptor protein, putative	Vesicular transport	27.1875	22.4952	240	57.2009	23.7386	15.9142	0.827408	8.82757	2.10394	0.873142	0.585349
Tb11.01.0415	237	hypothetical protein, conserved	0	18.57	17.0937	72.5851	#N/A	#N/A	22.8556	0.920497	3.90872	#N/A	#N/A	1.23078
Tb11.01.0420	1115	protein transport protein Sec13, putative	Vesicular transport	14.1417	25.0553	13.4105	18.382	11.6323	10.3487	1.77173	0.948298	1.29984	0.822556	0.731789
Tb11.01.0430	1024	hypothetical protein, conserved	0	12.5192	16.0785	9.30685	13.3658	9.62795	10.2265	1.28431	0.743407	1.06763	0.769056	0.816869
Tb11.01.0440	657	hypothetical protein, conserved	0	10.3844	16.5677	15.2196	16.9751	8.92062	11.6378	1.59543	1.46561	1.63466	0.859036	1.1207
Tb11.01.0450	1431	protein phosphatase 1, putative	Protein phosphatase	19.616	17.3877	240	48.9243	13.3517	16.5316	0.886406	12.2349	2.4941	0.680656	0.842762
Tb11.01.0460	918	hypothetical protein, conserved	0	9.36944	18.3009	11.5511	11.6139	8.69236	8.91032	1.95325	1.23284	1.23955	0.927735	0.950997
Tb11.01.0470	699	hypothetical protein, conserved	0	9.14553	23.0774	14.6664	21.1864	12.842	10.1321	2.52335	1.60367	2.31658	1.40418	1.10788
Tb11.01.0480	1751	hypothetical protein, conserved	0	26.5428	37.8201	240	240	24.3427	35.802	1.42487	9.04199	9.04199	0.917111	1.34884
Tb11.01.0490	1647	hypothetical protein, conserved	0	12.0206	11.9899	33.3941	23.4962	12.1287	12.7106	0.997444	2.77807	1.95466	1.00899	1.0574
Tb11.01.0500	1330	hypothetical protein, conserved	0	10.1654	13.6722	16.1466	21.7857	9.88345	8.01789	1.34497	1.58839	2.14312	0.972265	0.788744
Tb11.01.0510	1279	hypothetical protein, conserved	0	10.7997	15.3625	24.9085	21.5403	11.755	9.14263	1.4225	2.30641	1.99454	1.08846	0.846566
Tb11.01.0520	561	hypothetical protein, conserved	0	11.7486	13.3911	13.9034	12.4468	9.02973	15.3783	1.1398	1.1834	1.05943	0.768576	1.30894
Tb11.01.0530	2289	DNA repair protein, putative	DNA synthesis, modification, repair	14.2175	17.4589	49.6438	32.7529	16.0103	240	1.22798	3.49174	2.3037	1.1261	16.8806
Tb11.01.0540	1640	hypothetical protein, conserved	0	15.5369	10.9413	25.0849	21.301	9.69986	22.2661	0.704215	1.61454	1.37099	0.62431	1.43311
Tb11.01.0580	2922	glycerophosphoryl diester phosphodiesterase, putative	Lipids & fatty acids	13.077	20.8678	41.9527	77.6817	12.8405	20.8656	1.59577	3.20814	5.94034	0.981915	1.5956
Tb11.01.0590	471	hypothetical protein, conserved	0	10.1001	13.4362	44.3378	240	10.8998	13.1261	1.3303	4.38983	23.7621	1.07918	1.2996
Tb11.01.0600	1920	hypothetical protein, conserved	0	11.1345	16.0246	23.7041	21.7637	15.1383	23.1644	1.43919	2.1289	1.95463	1.35959	2.08042
Tb11.01.0610	1671	mitochondrial DEAD box protein ,KREH1	Mitochondrial RNA	11.1418	18.772	16.9383	18.1843	9.86872	15.5386	1.68483	1.52025	1.63208	0.88574	1.39462
Tb11.01.0620	1184	hypothetical protein, conserved	0	10.2295	16.4962	15.1833	12.4541	9.25522	9.6483	1.61262	1.48427	1.21747	0.904762	0.943188
Tb11.01.0625	503	DNA-dependent RNA polymerases, putative	RNA synthesis III	13.9595	28.3172	42.9789	240	20.0575	43.4536	2.02853	3.07883	17.1926	1.43684	3.11284
Tb11.01.0630	612	hypothetical protein, conserved	0	8.56124	26.1968	9.70744	10.6229	8.06742	17.9233	3.05993	1.13388	1.24081	0.942319	2.09354
Tb11.01.0640	697	NADH dehydrogenase subunit NB6M, putative	Mitochondrial electron transport	8.84038	17.5624	24.7235	18.7009	7.99892	9.06027	1.98662	2.79666	2.1154	0.904817	1.02487
Tb11.01.0650	1677	hypothetical protein, conserved	0	14.1039	16.5602	24.7628	25.3554	15.5152	14.6899	1.17416	1.75574	1.79776	1.10006	1.04155
Tb11.01.0660	1437	hypothetical protein, conserved	0	10.2064	20.6846	10.1919	12.3634	7.3588	8.01884	2.02663	0.998581	1.21134	0.720998	0.785667
Tb11.01.0670	1665	protein kinase, putative ,serine/threonine protein kinase, putative	Protein kinase	12.7544	17.496	18.6473	17.1283	12.2797	14.7563	1.37176	1.46203	1.34293	0.96278	1.15695
Tb11.01.0680	2323	HERTS ,flagellar component	LRRP	18.6624	24.6102	240	30.817	11.1147	29.9726	1.3187	12.8601	1.65129	0.595568	1.60604
Tb11.01.0690	3738	hypothetical protein, conserved	0	14.9535	23.7172	240	47.0957	18.4878	50.0337	1.58606	16.0497	3.14947	1.23635	3.34595
Tb11.01.0700	1081	ribose 5-phosphate isomerase, putative	Pentose phosphate pathway	105.319	30.453	240	240	200.631	27.7311	0.28915	2.27879	2.27879	1.90498	0.263305
Tb11.01.0710	2475	elongation factor G2-like protein	Translation	14.8486	20.5976	27.8456	41.4148	15.7593	31.6452	1.38717	1.8753	2.78914	1.06133	2.13119
Tb11.01.0720	1467	cation transporter, putative	Ion channel or pump	11.8029	31.1613	240	24.9737	13.0016	13.1273	2.64015	20.3341	2.1159	1.10156	1.11221
Tb11.01.0725	1277	cation transporter, putative	Ion channel or pump	25.6936	21.9943	39.7973	240	240	35.3362	0.856021	1.54892	9.34084	9.34084	1.37529
Tb11.01.0730	2200	cation transporter, putative	Ion channel or pump	22.3531	24.8163	32.395	240	130.334	28.9752	1.11019	1.44924	10.7368	5.83069	1.29625
Tb11.01.0760	1965	cation transporter, putative	Ion channel or pump	20.2475	21.7605	28.6993	240	63.2154	22.593	1.07473	1.41742	11.8533	3.12213	1.11584
Tb11.01.0770	1977	cation transporter, putative	Ion channel or pump	19.1975	21.8744	31.7159	240	58.0812	24.0287	1.13944	1.65208	12.5016	3.02546	1.25165
Tb11.01.0780	366	hypothetical protein, conserved	0	22.8634	14.8972	240	240	25.7936	15.9918	0.651573	10.4971	10.4971	1.12816	0.699451
Tb11.01.0790	1291	hypothetical protein, conserved	0	8.95561	18.1876	17.4181	12.9408	10.2251	13.4448	2.03086	1.94494	1.44499	1.14176	1.50128
Tb11.01.0800	1257	hypothetical protein, conserved	0	9.86401	20.5738	10.8397	15.1518	9.08941	10.0167	2.08575	1.09892	1.53607	0.921472	1.01548
Tb11.01.0810	1524	hypothetical protein, conserved	Lipids & fatty acids	8.56727	35.946	12.565	13.764	9.26102	11.6898	4.19574	1.46663	1.60658	1.08098	1.36447
Tb11.01.0820	3651	hypothetical protein, conserved	0	11.0315	18.1253	188.089	47.066	26.3693	240	1.64304	17.0502	4.2665	2.39035	21.7558
Tb11.01.0830	1882	hypothetical protein, conserved	0	9.66975	15.834	10.2294	11.3245	8.84968	7.85341	1.63747	1.05787	1.17113	0.915192	0.812162
Tb11.01.0840	1242	hypothetical protein, conserved	0	23.9379	16.2871	105.867	148.805	27.5346	15.3161	0.680388	4.42255	6.2163	1.15025	0.639825
Tb11.01.0850	2326	C-terminal motor kinesin, putative	Cytoskeleton	11.7801	21.9689	38.285	16.5307	13.1031	16.1193	1.86491	3.24997	1.40327	1.11231	1.36835
Tb11.01.0860	2310	hypothetical protein, conserved	0	13.2172	33.0651	240	44.6088	14.7431	19.1591	2.50166	18.1581	3.37505	1.11544	1.44956
Tb11.01.0870	1611	replication factor A, 51kDa subunit, putative	DNA synthesis, modification, repair	10.869	16.9202	136.079	47.6612	14.5806	10.7043	1.55674	12.5199	4.38505	1.34149	0.984843
Tb11.01.0880	712	hypothetical protein, conserved	Mitochondrial RNA	11.953	17.294	63.4482	58.0323	17.2558	19.5479	1.44684	5.30814	4.85505	1.44364	1.6354
Tb11.01.0890	5460	hypothetical protein, conserved	0	16.4498	79.3877	97.5756	25.0019	18.7095	23.9613	4.82607	5.93173	1.5199	1.13737	1.45663
Tb11.01.0900	1368	ATPase-like protein, putative	Enzyme	22.7557	13.9336	74.2326	240	21.8906	30.9206	0.612313	3.26215	10.5468	0.961983	1.35881
Tb11.01.0910	2637	DNA topoisomerase III, putative	DNA synthesis, modification, repair	10.045	17.8362	16.7554	17.5362	13.4301	11.1679	1.77564	1.66804	1.74577	1.337	1.11179
Tb11.01.0920	1041	ADP-ribosylation factor GTPase activating protein, putative ,centaurin beta 5	Vesicular transport	20.3302	18.511	240	177.038	24.1189	14.4997	0.910518	11.8051	8.70812	1.18636	0.713214
Tb11.01.0930	4228	protein kinase, putative	Protein kinase	16.2675	35.7482	51.8475	27.1843	14.6047	58.4815	2.19752	3.18719	1.67109	0.897788	3.59499
Tb11.01.0940	1743	hypothetical protein, conserved	0	12.667	18.9101	18.337	20.224	10.8315	17.9208	1.49286	1.44762	1.59659	0.855094	1.41476
Tb11.01.0950	1754	hypothetical protein, conserved	0	9.26981	17.2482	11.4144	21.5177	10.564	13.0306	1.86068	1.23135	2.32126	1.13961	1.4057
Tb11.01.0960	3166	proteasome regulatory non-ATP-ase subunit 2	Ubiquitin & proteasome	20.7572	35.4103	240	49.5955	19.8724	17.7495	1.70593	11.5623	2.38932	0.957373	0.855102
Tb11.01.0970	1101	hypothetical protein, conserved	0	11.151	16.0491	10.5381	18.9825	8.96635	11.7254	1.43925	0.945029	1.70231	0.804082	1.05151
Tb11.01.0980	5711	hypothetical protein, conserved (pseudogene)	pseudogene	17.6248	#N/A	240	30.1964	25.2255	74.0867	#N/A	13.6172	1.71329	1.43126	4.20356
Tb11.01.1000	1738	hypothetical protein, conserved	0	13.1253	16.4475	240	240	15.1759	23.5521	1.25311	18.2853	18.2853	1.15623	1.7944
Tb11.01.1020	1744	hypothetical protein, conserved	0	10.2509	18.2568	17.9095	20.8232	9.92338	10.3939	1.78099	1.74711	2.03135	0.968047	1.01394
Tb11.01.1030	2776	protein kinase ,zinc finger protein kinase	Protein kinase	17.4351	30.7164	32.6335	14.3431	8.70372	38.4045	1.76175	1.87171	0.822658	0.499206	2.20271
Tb11.01.1040	2173	hypothetical protein, conserved	0	12.3234	26.8729	22.0785	21.1853	10.6234	18.6134	2.18064	1.79159	1.71911	0.86205	1.51041
Tb11.01.1050	2541	hypothetical protein, conserved	0	17.5362	22.2457	240	56.0107	22.0752	37.5761	1.26856	13.686	3.19401	1.25884	2.14277
Tb11.01.1070	2407	hypothetical protein, conserved	0	11.0461	17.1673	20.7756	26.4419	12.8638	14.0583	1.55415	1.88081	2.39378	1.16455	1.27269
Tb11.01.1080	2772	tRNA pseudouridine synthase, putative	rRNA-tRNA processing	11.2933	18.7154	49.5409	18.8204	10.0279	11.3405	1.65721	4.38674	1.6665	0.887952	1.00417
Tb11.01.1090	805	hypothetical protein, conserved	0	10.6148	15.4953	14.2119	23.2888	15.1164	21.5014	1.45979	1.33888	2.194	1.42409	2.02561
Tb11.01.1100	3030	helicase-like protein	DNA synthesis, modification, repair	14.7271	28.4762	240	32.3085	14.4108	240	1.9336	16.2965	2.19382	0.978523	16.2965
Tb11.01.1110	1047	hypothetical protein, conserved	0	9.82509	25.9582	17.2545	10.4972	9.13536	21.8054	2.64203	1.75617	1.0684	0.929799	2.21936
Tb11.01.1120	1266	phosphonopyruvate decarboxylase-like protein, putative	Glucose & glycerol	11.3574	19.2874	19.7495	16.4855	14.1702	18.0438	1.69823	1.73891	1.45152	1.24766	1.58872
Tb11.01.1130	1608	prenyltransferase, putative	Prenylation	13.0081	23.4953	71.6687	27.3891	14.01	49.2198	1.8062	5.50954	2.10554	1.07702	3.78378
Tb11.01.1140	1863	hypothetical protein, conserved	0	12.1338	19.1849	18.3215	14.6093	9.12974	14.3968	1.58111	1.50996	1.20402	0.752423	1.18651
Tb11.01.1160	798	lipoate-protein ligase, putative ,lipoyltransferase, putative	Mitochondrial pathway	14.7144	23.2005	41.7276	21.8671	10.4551	10.9698	1.57672	2.83582	1.4861	0.710536	0.745513
Tb11.01.1170	3694	hypothetical protein, conserved	0	19.0053	19.4357	240	36.0934	13.4909	14.1282	1.02265	12.6281	1.89912	0.709851	0.74338
Tb11.01.1180	492	hypothetical protein	0	16.1766	15.6042	240	240	85.1739	12.4908	0.964611	14.8362	14.8362	5.26524	0.772152
Tb11.01.1190	1581	ATP synthase, putative	Oxidative phosphorylation	16.9381	15.2815	240	240	26.3875	17.2174	0.902197	14.1692	14.1692	1.55788	1.01649
Tb11.01.1200	1194	hypothetical protein, conserved	RNA synthesis II	9.62343	19.1524	11.3548	16.2993	9.38464	10.2361	1.99019	1.17991	1.69371	0.975186	1.06366
Tb11.01.1210	1694	hypothetical protein, conserved	0	16.6749	18.78	48.3589	41.998	19.828	14.5796	1.12624	2.9001	2.51863	1.18909	0.874345
Tb11.01.1215	619	cyclophilin type peptidyl-prolyl cis-trans isomerase, putative	Mitochondrial translation	14.9115	14.9466	17.8105	21.3611	14.7597	8.80376	1.00235	1.19441	1.43252	0.989818	0.590399
Tb11.01.1220	709	hypothetical protein, conserved	0	13.9232	11.0058	30.346	56.8285	15.2935	10.6415	0.790467	2.17953	4.08157	1.09842	0.764303
Tb11.01.1230	1117	ADP-ribosylation factor GTPase activating protein, putative	Vesicular transport	33.3941	14.964	24.8752	20.6602	8.99377	10.9505	0.448103	0.744898	0.61868	0.269322	0.327916
Tb11.01.1240	932	hypothetical protein, conserved	0	9.03544	10.4751	8.47989	9.00226	7.48014	12.235	1.15933	0.938514	0.996328	0.827867	1.35411
Tb11.01.1250	1061	hypothetical protein, conserved	0	9.318	17.3298	14.4307	15.1213	8.0192	9.41645	1.85982	1.54869	1.62281	0.860614	1.01057
Tb11.01.1260	414	hypothetical protein, conserved	0	12.4188	15.3551	11.1039	20.7748	18.5567	14.3164	1.23644	0.894122	1.67285	1.49423	1.1528
Tb11.01.1270	1769	nucleic acid binding protein, putative	DNA synthesis, modification, repair	12.3693	18.1022	28.2015	16.2346	12.1738	14.8845	1.46347	2.27996	1.31249	0.98419	1.20334
Tb11.01.1280	2908	DNA topoisomerase III, putative	DNA synthesis, modification, repair	12.7671	22.3376	21.3575	20.5225	16.4766	11.5669	1.74963	1.67286	1.60745	1.29056	0.905992
Tb11.01.1290	1162	14-3-3-I protein	Signalling	175.134	85.6141	240	240	240	58.6455	0.488848	1.37038	1.37038	1.37038	0.33486
Tb11.01.1300	1709	hypothetical protein, conserved	0	14.0935	14.1033	54.1906	82.405	14.1161	14.6981	1.00069	3.84506	5.847	1.0016	1.0429
Tb11.01.1310	1405	replication factor C, subunit 4, putative	DNA synthesis, modification, repair	13.411	15.1451	20.9075	45.3555	20.7827	10.7206	1.12931	1.55898	3.38197	1.54968	0.799389
Tb11.01.1320	1638	oxidoreductase, putative	Enzyme	9.7042	17.7124	9.33588	10.6335	8.93342	8.99243	1.82523	0.962046	1.09577	0.920573	0.926654
Tb11.01.1330	917	hypothetical protein, conserved	0	9.94679	21.3593	10.4064	11.7462	7.9565	9.16476	2.14736	1.04621	1.18091	0.799906	0.921379
Tb11.01.1340	793	hypothetical protein, conserved	0	34.3039	20.3203	32.3957	141.165	30.3957	21.2075	0.592361	0.944375	4.11514	0.886071	0.618224
Tb11.01.1350	1428	S-adenosylhomocysteine hydrolase, putative	Amino acid metabolism	54.3435	52.4104	240	240	49.9666	38.4745	0.964428	4.41635	4.41635	0.919458	0.707986
Tb11.01.1360	906	hypothetical protein, conserved	0	16.7282	19.5338	25.4698	240	24.7388	14.0878	1.16772	1.52257	14.347	1.47887	0.842162
Tb11.01.1370	1225	eukaryotic translation initiation factor 3 subunit, putative ,TGF-beta receptor interacting protein 1	Translation	17.2083	17.8563	28.4932	240	21.18	23.0657	1.03766	1.65578	13.9468	1.2308	1.34039
Tb11.01.1380	2892	hypothetical protein, conserved	0	13.2552	21.228	28.6474	25.9572	15.9666	114.12	1.60149	2.16122	1.95826	1.20455	8.60948
Tb11.01.1390	744	hypothetical protein, conserved	0	8.73046	12.1655	240	31.2539	9.96084	11.4668	1.39346	27.49	3.57986	1.14093	1.31343
Tb11.01.1400	1997	glycyl-tRNA synthetase, putative	Translation tRNA	19.4225	16.4307	44.6188	68.6834	29.035	17.5464	0.845963	2.29727	3.53628	1.49491	0.903405
Tb11.01.1410	1482	hypothetical protein, conserved	0	11.2791	14.3092	17.8605	18.1322	10.5016	12.9891	1.26865	1.58351	1.60759	0.93107	1.15161
Tb11.01.1420	1157	hypothetical protein, conserved	0	10.1066	13.1194	16.9625	17.1072	8.87198	7.4884	1.2981	1.67836	1.69267	0.877837	0.740939
Tb11.01.1440	1162	glycine synthase, putative	Amino acid metabolism	8.07921	18.0157	10.6485	11.6926	8.85853	9.04627	2.22989	1.31802	1.44725	1.09646	1.1197
Tb11.01.1450	1814	hypothetical protein, conserved	0	12.8773	16.5935	13.1865	15.5686	9.92728	9.25297	1.28858	1.02401	1.209	0.770912	0.718548
Tb11.01.1460	1158	hypothetical protein, conserved	0	10.5329	16.0895	12.0998	15.9904	9.24937	10.4428	1.52754	1.14876	1.51814	0.87814	0.991443
Tb11.01.1465	333	nascent polypeptide associated complex alpha subunit, putative	Translation	81.4792	41.0318	77.6128	240	240	240	0.503586	0.952547	2.94554	2.94554	2.94554
Tb11.01.1470	669	60S ribosomal protein L10a, putative	Ribosome	179.544	41.5035	240	240	240	240	0.23116	1.33672	1.33672	1.33672	1.33672
Tb11.01.1475	274	40S ribosomal protein S27, putative	Ribosome	148.589	131.445	55.2579	240	240	240	0.884625	0.371885	1.61519	1.61519	1.61519
Tb11.01.1480	554	60S ribosomal protein L34, putative	Ribosome	98.6141	69.8144	56.2897	240	240	240	0.707956	0.570808	2.43373	2.43373	2.43373
Tb11.01.1490	624	hypothetical protein, conserved	0	12.2121	14.8449	15.368	19.3599	12.3786	12.645	1.21559	1.25842	1.5853	1.01363	1.03545
Tb11.01.1500	2052	hypothetical protein, conserved	0	13.0639	20.0102	20.8898	18.4122	12.5583	10.818	1.53172	1.59905	1.40939	0.961295	0.828079
Tb11.01.1510	1448	hypothetical protein, conserved	0	9.27782	23.212	17.9052	22.1895	8.21878	10.4324	2.50188	1.92989	2.39167	0.885853	1.12444
Tb11.01.1530	621	hypothetical protein, conserved	0	15.7111	20.819	60.1408	117.413	26.3809	23.5996	1.32512	3.82791	7.47327	1.67912	1.5021
Tb11.01.1540	3263	hypothetical protein, conserved	0	9.81743	19.5462	22.2217	19.5555	11.5467	14.419	1.99097	2.2635	1.99192	1.17614	1.46871
Tb11.01.1550	552	calmodulin, putative	Calcium	11.2327	10.0983	240	38.3356	11.7824	14.2444	0.899009	21.3661	3.41284	1.04893	1.26812
Tb11.01.1560	1128	hypothetical protein, conserved	Nucleo-cytoplasmic transport	11.9427	12.6664	28.7313	32.2551	16.5961	15.932	1.0606	2.40577	2.70083	1.38965	1.33404
Tb11.01.1570	769	NUDIX hydrolase, conserved	Enzyme	17.7495	16.2311	240	145.495	16.0439	17.9463	0.914453	13.5215	8.19714	0.903906	1.01108
Tb11.01.1590	1799	hypothetical protein, conserved	0	12.733	19.5399	56.8406	102.054	17.7203	57.0879	1.53459	4.46404	8.01495	1.39168	4.48346
Tb11.01.1600	680	hypothetical protein, conserved	Mitochondrial translation	12.2696	11.2264	25.5772	24.0276	12.9057	12.05	0.914983	2.08461	1.95831	1.05185	0.982109
Tb11.01.1610	1229	hypothetical protein, conserved	0	10.2654	18.6554	11.2188	12.9905	8.31753	10.2443	1.81731	1.09287	1.26547	0.81025	0.997944
Tb11.01.1620	492	hypothetical protein, conserved	0	20.4567	14.0232	240	67.9209	22.6842	10.6668	0.685507	11.7321	3.32023	1.10889	0.521435
Tb11.01.1625	382	hypothetical protein, conserved	0	240	55.2078	240	240	99.3023	82.3588	0.230033	1	1	0.41376	0.343162
Tb11.01.1630	2581	hypothetical protein, conserved	0	11.9971	16.3587	58.8296	29.5411	15.3477	19.0463	1.36355	4.90363	2.46234	1.27928	1.58757
Tb11.01.1640	1413	hypothetical protein, conserved	0	13.2109	12.9719	18.1427	20.7502	9.08228	18.1902	0.981906	1.37331	1.57069	0.687483	1.37691
Tb11.01.1650	1749	signal recognition particle receptor alpha subunit, putative	Vesicular transport	15.5899	17.9094	240	20.4491	16.4566	21.733	1.14878	15.3945	1.31168	1.05559	1.39404
Tb11.01.1660	1779	hypothetical protein, conserved	Mitochondrial pathway	12.0836	22.5393	17.5919	14.7483	13.7935	14.6994	1.86528	1.45584	1.22052	1.1415	1.21647
Tb11.01.1670	1126	hypothetical protein, conserved	0	18.1362	15.4504	240	170.024	53.6268	24.2459	0.85191	13.2332	9.37488	2.9569	1.33688
Tb11.01.1680	2113	polyubiquitin, putative	Ubiquitin & proteasome	240	160.814	240	240	240	127.973	0.670057	1	1	1	0.53322
Tb11.01.1690	881	hypothetical protein, conserved	Mitochondrial electron transport	9.19654	15.17	54.9998	34.5928	8.74474	9.21536	1.64954	5.98049	3.7615	0.950873	1.00205
Tb11.01.1700	675	hypothetical protein, conserved	0	8.68327	13.9236	13.4614	14.8653	8.75392	6.99464	1.6035	1.55027	1.71194	1.00814	0.805531
Tb11.01.1710	2394	hypothetical protein, conserved	0	8.34159	24.4621	11.6195	12.2166	7.44241	9.07921	2.93255	1.39297	1.46455	0.892206	1.08843
Tb11.01.1720	900	hypothetical protein, conserved	0	9.38878	26.7584	11.2974	9.2871	8.76111	9.65568	2.85003	1.20329	0.98917	0.933146	1.02843
Tb11.01.1730	644	hypothetical protein, conserved	0	9.32102	18.0424	12.6934	12.9402	7.78914	8.45831	1.93567	1.3618	1.38828	0.835654	0.907445
Tb11.01.1740	3212	2-oxoglutarate dehydrogenase E1 component, putative	Citric acid cycle	49.8957	27.2458	240	240	19.5454	42.4758	0.546055	4.81004	4.81004	0.391725	0.851292
Tb11.01.1750	1079	glycosyl transferase-like protein	Glycan synthesis & metabolism	9.95609	22.9537	14.1869	16.7745	10.5693	11.5257	2.30549	1.42494	1.68485	1.06159	1.15766
Tb11.01.1760	803	class-E vacuolar protein-sorting protein 24 (Vps24p), putative ,SNF7-like protein, putative	Lysosome	11.9526	10.8313	27.5313	38.9325	13.8765	10.4038	0.906185	2.30337	3.25724	1.16096	0.870417
Tb11.01.1770	1939	vacuolar sorting-associated protein-like, putative	Lysosome	11.9778	15.0666	50.9966	67.0199	18.3098	11.3253	1.25787	4.25758	5.59533	1.52864	0.945525
Tb11.01.1780	1129	short-chain dehydrogenase, putative	Enzyme	8.96518	18.0631	9.49284	15.4388	8.29823	9.24425	2.01481	1.05886	1.72208	0.925606	1.03113
Tb11.01.1790	843	60S ribosomal protein L29, putative	Ribosome	240	44.8266	38.6865	240	240	240	0.186778	0.161194	1	1	1
Tb11.01.1800	470	hypothetical protein, conserved	0	7.77237	#N/A	20.6711	34.399	6.51991	10.0251	#N/A	2.65956	4.42581	0.838858	1.28984
Tb11.01.1810	386	hypothetical protein, conserved	Mitochondrial translation	10.2617	19.4948	27.3153	42.4038	14.2866	12.6766	1.89977	2.66187	4.13225	1.39223	1.23533
Tb11.01.1820	882	Biotin--acetyl-CoA-carboxylase ligase, putative ,biotin--protein ligase, putative	Enzyme	24.7226	26.8259	46.4324	240	25.1886	11.5908	1.08507	1.87813	9.70771	1.01885	0.468835
Tb11.01.1830	747	hypothetical protein, conserved	0	9.40755	14.5618	69.1487	27.6873	11.1251	7.22802	1.54789	7.35034	2.94309	1.18257	0.768321
Tb11.01.1840	1439	hypothetical protein, conserved	Mitochondrial translation	9.69661	18.1846	16.1736	31.8169	12.2817	9.28533	1.87536	1.66796	3.28124	1.26659	0.957585
Tb11.01.1850	1452	hypothetical protein, conserved	0	12.0064	18.1681	49.8108	19.7547	11.6476	9.08647	1.5132	4.14868	1.64534	0.970117	0.756802
Tb11.01.1860	655	hypothetical protein, conserved	0	8.35299	12.7257	88.0286	17.954	8.59712	10.2073	1.52349	10.5386	2.14941	1.02923	1.22199
Tb11.01.1870	1246	actin-like protein, putative	Cytoskeleton_Actin	9.14385	14.9654	14.5237	14.575	8.1885	8.51196	1.63666	1.58835	1.59396	0.89552	0.930894
Tb11.01.1880	2598	hypothetical protein, conserved	0	10.7281	19.9751	240	20.8229	13.4337	15.5282	1.86194	22.3711	1.94096	1.25219	1.44743
Tb11.01.1890	1030	hypothetical protein, conserved	0	11.2611	25.3464	7.98296	10.5974	7.91277	6.24632	2.2508	0.7089	0.94107	0.702666	0.554683
Tb11.01.1900	818	hypothetical protein, conserved	Mitochondrial electron transport	8.90904	12.1967	12.4161	21.619	9.04943	8.005	1.36902	1.39365	2.42664	1.01576	0.898525
Tb11.01.1910	3947	hypothetical protein, conserved	Mitochondrial translation	16.7077	20.6295	75.822	23.3073	11.2846	25.4706	1.23472	4.53813	1.395	0.675413	1.52448
Tb11.01.1920	410	60S ribosomal protein L22, putative	Ribosome	240	38.8404	240	240	240	240	0.161835	1	1	1	1
Tb11.01.1930	943	hypothetical protein, conserved	Mitochondrial translation	9.26114	20.45	16.5122	41.1681	9.15229	7.98356	2.20815	1.78295	4.44526	0.988247	0.86205
Tb11.01.1940	1807	hypothetical protein, conserved	0	12.569	18.9036	17.2946	13.6526	10.6102	17.6411	1.50399	1.37598	1.08621	0.844157	1.40355
Tb11.01.1950	3760	telomerase reverse transcriptase, putative	DNA synthesis, modification, repair	15.1916	28.8914	23.3987	20.6303	16.2653	20.6667	1.9018	1.54024	1.358	1.07067	1.3604
Tb11.01.1960	1609	hypothetical protein, conserved	0	15.9595	13.4286	240	44.1833	17.1143	13.9593	0.841421	15.0381	2.76847	1.07236	0.874674
Tb11.01.1970	3066	hypothetical protein, conserved	0	12.7346	30.5792	28.665	13.2331	11.0497	13.3871	2.40126	2.25095	1.03914	0.867688	1.05123
Tb11.01.1980	488	hypothetical protein, conserved	0	9.88601	16.7346	32.2372	240	27.5196	11.1435	1.69276	3.26089	24.2767	2.78369	1.1272
Tb11.01.1990	1176	hypothetical protein, conserved	RNA synthesis	16.9681	15.7259	61.2176	84.6381	35.4301	15.6838	0.926791	3.6078	4.98806	2.08804	0.92431
Tb11.01.2000	793	hslVU complex proteolytic subunit, putative ,hslVU complex proteolytic subunit, threonine peptidase, Clan T(1), family T1B	Protease or peptidase	21.1499	40.6234	128.909	240	40.4965	27.0401	1.92074	6.09503	11.3476	1.91474	1.2785
Tb11.01.2010	1510	hypothetical protein, conserved	0	14.1634	13.1017	49.3304	32.9474	26.7863	11.1819	0.925036	3.48294	2.32623	1.89123	0.789491
Tb11.01.2020	1425	hypothetical protein, conserved	0	11.4645	25.2623	48.7466	22.6426	11.7869	12.5765	2.20353	4.25197	1.97503	1.02812	1.097
Tb11.01.2030	809	golgi SNARE protein-like ,GOLGI SNAP receptor complex member, putative	Vesicular transport	8.95845	17.7587	12.4959	10.1188	7.95709	7.51306	1.98234	1.39487	1.12952	0.888222	0.838657
Tb11.01.2050	4447	zinc carboxypeptidase, putative ,metallo- peptidase, Clan MC, Family M14	Protease or peptidase	12.6007	49.3636	240	13.7112	9.63302	8.35506	3.91754	19.0466	1.08813	0.764485	0.663065
Tb11.01.2070	1236	hypothetical protein, conserved	0	15.6487	16.3679	204.414	45.3935	16.6895	12.8146	1.04596	13.0627	2.90077	1.06651	0.81889
Tb11.01.2080	270	hypothetical protein, unlikely	unlikely	20.3642	#N/A	33.8135	42.153	18.3716	8.41409	#N/A	1.66044	2.06996	0.902153	0.413181
Tb11.01.2090	1495	hypothetical protein, conserved	0	12.7644	20.5224	11.3047	13.6182	10.4022	8.91643	1.60778	0.885637	1.06688	0.814937	0.698537
Tb11.01.2100	2004	hypothetical protein, conserved	0	8.7073	19.1926	32.1972	14.5786	11.0384	36.3804	2.2042	3.69772	1.6743	1.26772	4.17814
Tb11.01.2110	915	phosphoglycerate mutase family member 5, putative	Glucose & glycerol	44.9912	19.9964	240	240	33.5111	240	0.444452	5.33438	5.33438	0.744838	5.33438
Tb11.01.2120	1039	hypothetical protein, conserved	0	9.16837	15.4271	16.6412	18.5635	9.37237	12.6246	1.68264	1.81506	2.02473	1.02225	1.37697
Tb11.01.2130	1460	hypothetical protein, conserved	0	9.71307	13.0832	28.2034	20.1348	11.3501	10.7652	1.34697	2.90365	2.07296	1.16854	1.10832
Tb11.01.2140	3355	glycosyl hydrolase-like protein	Glycan synthesis & metabolism	11.4874	18.6745	196.739	34.299	13.7508	19.8802	1.62565	17.1265	2.98578	1.19703	1.7306
Tb11.01.2150	1349	hypothetical protein, conserved	0	14.4485	16.9941	240	32.7546	13.0914	9.54639	1.17618	16.6107	2.26699	0.906071	0.660717
Tb11.01.2160	2325	hypothetical protein, conserved	0	11.5417	21.5704	17.0601	14.6487	9.07702	11.5597	1.86891	1.47813	1.2692	0.786452	1.00155
Tb11.01.2170	737	hypothetical protein, conserved	Mitochondrial translation	7.7488	17.8814	13.1641	11.773	7.22136	8.48864	2.30763	1.69886	1.51934	0.931933	1.09548
Tb11.01.2180	737	hypothetical protein, conserved	0	13.7838	10.2526	7.12376	11.7638	11.4179	18.7482	0.743812	0.51682	0.853451	0.828352	1.36016
Tb11.01.2190	533	DNA-directed RNA polymerase, putative	RNA synthesis I	9.73782	15.7957	8.91753	12.0626	8.9103	16.7943	1.6221	0.915762	1.23874	0.91502	1.72465
Tb11.01.2200	1943	hypothetical protein, conserved	0	11.4297	14.0588	22.243	12.5677	9.53137	11.2766	1.23003	1.94608	1.09957	0.833914	0.986611
Tb11.01.2210	775	hypothetical protein, conserved	0	9.64875	16.3827	8.92639	11.3521	8.51792	8.96547	1.69791	0.925134	1.17654	0.8828	0.929184
Tb11.01.2220	1289	UDP-N-acetylglucosamine--dolichyl-phosphate n- acetylglucosaminephosphotransferase, putative	Glycan synthesis & metabolism	12.1788	16.8176	29.6187	30.0435	11.79	17.4682	1.38089	2.43199	2.46688	0.968075	1.43432
Tb11.01.2230	1197	hypothetical protein, conserved	0	10.5629	15.4849	14.8574	22.2174	12.7075	9.78582	1.46598	1.40657	2.10335	1.20303	0.926435
Tb11.01.2240	1959	hypothetical protein, conserved	0	11.5327	23.8626	240	58.2204	13.4757	13.7812	2.06913	20.8105	5.04831	1.16848	1.19497
Tb11.01.2250	2928	hypothetical protein, conserved	0	10.3271	22.723	38.7443	32.426	13.5882	12.194	2.20034	3.75172	3.1399	1.31579	1.18078
Tb11.01.2260	1825	hypothetical protein, conserved	0	11.1616	15.096	19.7583	16.6747	8.25342	7.40141	1.35249	1.7702	1.49393	0.739447	0.663113
Tb11.01.2270	1701	hypothetical protein, conserved	0	12.4196	31.5367	10.3535	15.6889	11.2264	9.3835	2.53926	0.833642	1.26323	0.903925	0.755538
Tb11.01.2280	911	ubiquinone biosynthesis methyltransferase, putative	Mitochondrial pathway	11.4684	13.4547	138.926	29.3892	8.49431	10.6197	1.1732	12.1139	2.56264	0.740673	0.925999
Tb11.01.2290	4312	protein kinase, putative ,tyrosine kinase, putative	Protein kinase	17.3533	42.2427	240	20.9823	19.0814	19.7032	2.43427	13.8302	1.20912	1.09958	1.13541
Tb11.01.2300	636	hypothetical protein, conserved	0	11.2035	19.9352	6.88042	9.99597	7.73504	10.4892	1.77937	0.61413	0.892217	0.690412	0.936245
Tb11.01.2310	2728	hypothetical protein, conserved	0	34.5408	24.9863	240	184.828	28.0047	23.1438	0.723387	6.94831	5.35101	0.810773	0.670043
Tb11.01.2320	2593	hypothetical protein, conserved	0	12.7496	26.8062	58.1745	23.7009	11.1234	37.3146	2.10252	4.56287	1.85896	0.872452	2.92674
Tb11.01.2330	2412	eukaryotic translation initation factor 4 gamma, putative	Translation	17.7835	19.4865	240	138.891	25.6953	14.9989	1.09577	13.4957	7.81012	1.4449	0.843416
Tb11.01.2340	1168	hypothetical protein, conserved	Mitochondrial translation	11.3099	15.0147	7.57699	10.9582	9.25153	9.50102	1.32757	0.669944	0.968904	0.818004	0.840063
Tb11.01.2350	2724	hypothetical protein, conserved	0	13.3258	19.183	43.2407	26.987	17.3838	30.6741	1.43954	3.24487	2.02517	1.30452	2.30185
Tb11.01.2360	1722	hypothetical protein, conserved	0	9.58048	25.931	18.3868	12.4927	10.2339	11.167	2.70665	1.9192	1.30397	1.06821	1.1656
Tb11.01.2370	1350	hypothetical protein, conserved	0	10.8289	19.9415	15.3208	17.6234	7.61359	10.2603	1.8415	1.41481	1.62744	0.703081	0.947493
Tb11.01.2380	2892	hypothetical protein, conserved	0	12.3029	20.0172	240	25.5312	12.3062	11.1928	1.62703	19.5075	2.07521	1.00027	0.909769
Tb11.01.2390	827	hypothetical protein, conserved	0	17.1254	15.2075	240	240	30.9255	10.5891	0.888007	14.0142	14.0142	1.80582	0.618326
Tb11.01.2400	2697	hypothetical protein, conserved	0	14.5011	19.4852	20.4609	17.9813	11.4322	17.6728	1.34371	1.41099	1.24	0.788372	1.21873
Tb11.01.2410	1719	DNA-(apurinic or apyrimidinic site) lyase, putative	DNA synthesis, modification, repair	9.29097	17.4111	18.4685	19.6079	8.99404	21.1682	1.87398	1.9878	2.11042	0.968042	2.27836
Tb11.01.2420	2765	beta-adaptin 3, putative ,adaptin complex 3 subunit, putative	Vesicular transport	10.5417	24.6735	34.8876	14.6079	11.384	14.7195	2.34055	3.30947	1.38572	1.0799	1.39631
Tb11.01.2430	12252	hypothetical protein, conserved	0	45.2178	28.6247	240	80.7853	45.0553	240	0.633041	5.30765	1.78658	0.996407	5.30765
Tb11.01.2440	4031	glycosyl hydrolase, putative	Glycan synthesis & metabolism	24.6997	15.9624	240	170.821	21.9894	60.1786	0.646259	9.71672	6.91592	0.89027	2.43641
Tb11.01.2460	1227	hypothetical protein, conserved	0	18.849	20.2066	56.1644	240	143.349	78.3017	1.07202	2.97971	12.7328	7.60514	4.15417
Tb11.01.2470	848	hypothetical protein, conserved	vesicular transport	8.61304	13.8579	19.7117	23.7503	9.24877	15.1806	1.60895	2.28859	2.75748	1.07381	1.76251
Tb11.01.2480	3549	hypothetical protein, conserved	0	12.0299	28.6011	48.6372	22.5538	15.912	19.7335	2.3775	4.04304	1.87482	1.3227	1.64037
Tb11.01.2490	2987	hypothetical protein, conserved	0	14.2568	25.3079	33.5962	21.68	17.7228	17.77	1.77515	2.35651	1.52068	1.24312	1.24642
Tb11.01.2500	3823	SNF2 DNA repair protein, putative ,ATP-dependent helicase, putative ,SNF2 family helicase, putative	DNA synthesis, modification, repair	12.1774	33.7118	62.1679	19.4272	17.3377	27.9436	2.76838	5.10518	1.59535	1.42376	2.29471
Tb11.01.2510	857	vacuolar sorting-associated protein-like, putative	Lysosome	8.34254	12.9487	15.0165	15.2242	8.42158	9.27519	1.55212	1.79999	1.82489	1.00947	1.11179
Tb11.01.2520	1778	Pre-mRNA-splicing factor CWC22, putative	RNA processing	7.96275	18.5868	23.5079	13.4503	10.1718	18.7191	2.33422	2.95223	1.68915	1.27742	2.35084
Tb11.01.2530	2095	kinesin-like protein, putative	Cytoskeleton	17.7078	17.3707	240	168.921	28.5328	50.28	0.980962	13.5534	9.53935	1.61131	2.83943
Tb11.01.2540	2696	hypothetical protein, conserved	0	14.4007	15.0735	143.909	49.5794	16.4855	16.3807	1.04673	9.99323	3.44286	1.14477	1.1375
Tb11.01.2550	975	hypothetical protein, conserved	Transporter	10.0094	13.2354	24.2409	23.6271	8.77631	17.0755	1.32229	2.4218	2.36049	0.876804	1.70594
Tb11.01.2560	769	40S ribosomal protein SA, putative	Ribosome	145.8	36.7055	55.4652	240	206.58	240	0.251752	0.380418	1.64609	1.41687	1.64609
Tb11.01.2570	1015	hypothetical protein, conserved	0	19.7172	15.2511	240	240	20.7171	13.2896	0.773492	12.1721	12.1721	1.05071	0.674011
Tb11.01.2580	2676	#N/A	RNA binding	16.7336	#N/A	240	26.3356	13.6292	240	#N/A	14.3424	1.57381	0.81448	14.3424
Tb11.01.2590	1383	protein kinase ck2 regulatory subunit, putative ,casein kinase II beta chain, putative	Protein kinase	21.9348	20.3868	240	94.7357	65.3771	15.0358	0.929427	10.9415	4.31897	2.98053	0.685476
Tb11.01.2600	483	hypothetical protein	0	27.6531	17.1126	240	85.1394	43.6177	12.6046	0.618832	8.67895	3.07884	1.57732	0.455812
Tb11.01.2610	1646	hypothetical protein, conserved	0	15.6387	14.6937	9.32504	14.8157	10.7834	10.9394	0.939574	0.59628	0.947377	0.689532	0.699508
Tb11.01.2620	1434	hypothetical protein, conserved	0	8.72518	17.9262	8.53028	11.118	9.2436	9.88424	2.05454	0.977662	1.27425	1.05942	1.13284
Tb11.01.2630	1336	hypothetical protein, conserved	0	9.26802	13.8497	15.3503	20.7202	8.96727	12.1947	1.49436	1.65626	2.23567	0.967549	1.31578
Tb11.01.2640	852	32 kDa ER-associated protein	Vesicular transport	13.0297	15.4523	28.3825	45.1589	10.6052	13.1797	1.18593	2.17828	3.46583	0.813921	1.01151
Tb11.01.2650	1413	hypothetical protein, conserved	0	9.68867	13.6109	72.5625	14.8142	10.9408	11.0454	1.40483	7.48941	1.52902	1.12923	1.14003
Tb11.01.2660	1329	hypothetical protein, conserved	0	9.22323	12.7198	11.5547	16.2431	10.822	8.9133	1.3791	1.25279	1.7611	1.17334	0.966397
Tb11.01.2670	2622	MENG ,flagellar component	Cytoskeleton	11.5814	17.6194	240	23.581	17.5377	49.17	1.52135	20.7229	2.03611	1.5143	4.24561
Tb11.01.2680	834	40S ribosomal protein SA, putative	Ribosome	145.913	36.6188	55.4652	240	205.945	240	0.250963	0.380125	1.64482	1.41142	1.64482
Tb11.01.2690	1411	hypothetical protein, conserved	0	11.2403	11.6436	27.8629	68.8857	12.0952	10.8659	1.03588	2.47883	6.12845	1.07605	0.966691
Tb11.01.2695	1749	delta tubulin ,tubulin delta chain	Cytoskeleton	18.3287	17.7737	33.2752	190.439	35.881	14.4851	0.969719	1.81547	10.3902	1.95764	0.790294
Tb11.01.2700	1101	hypothetical protein, conserved	0	82.5064	28.9571	240	29.7112	20.231	#N/A	0.350968	2.90886	0.360107	0.245206	#N/A
Tb11.01.2720	1038	hypothetical protein, conserved	0	10.4756	12.9758	13.5767	38.0804	12.4412	11.4023	1.23867	1.29603	3.63516	1.18764	1.08846
Tb11.01.2730	8472	hypothetical protein, conserved	0	24.2498	58.7413	240	71.8416	26.2651	119.648	2.42234	9.89698	2.96256	1.0831	4.93399
Tb11.01.2740	2056	hypothetical protein, conserved	0	19.61	22.9645	143.569	32.0193	13.3612	30.4927	1.17106	7.32122	1.63281	0.681349	1.55496
Tb11.01.2750	783	hypothetical protein, conserved	0	11.1409	47.1199	15.8058	31.8333	16.218	17.635	4.22945	1.41872	2.85734	1.45572	1.58291
Tb11.01.2770	522	hypothetical protein, conserved	0	9.72578	22.1557	28.3594	10.806	7.72421	8.73232	2.27804	2.9159	1.11107	0.7942	0.897853
Tb11.01.2780	1214	translation initiation factor 2 subunit, putative	Translation	15.0122	14.0907	18.7567	46.25	24.6792	27.0541	0.938615	1.24943	3.08082	1.64393	1.80214
Tb11.01.2790	1671	hypothetical protein, conserved	0	12.1677	13.565	240	28.9659	12.4702	18.981	1.11483	19.7243	2.38055	1.02486	1.55994
Tb11.01.2800	1155	hypothetical protein, conserved	0	71.3341	31.7852	240	240	62.0007	19.4126	0.445583	3.36445	3.36445	0.86916	0.272136
Tb11.01.2810	5266	hypothetical protein, conserved	0	16.4577	33.3709	240	35.2016	23.9509	240	2.02768	14.5829	2.13892	1.45531	14.5829
Tb11.01.2820	713	exosome-associated protein 4	RNA degradation	11.2268	14.8341	21.5781	39.4282	14.984	21.3697	1.32131	1.92202	3.51197	1.33467	1.90346
Tb11.01.2830	870	hypothetical protein, conserved	0	16.6364	12.0715	15.4231	37.2136	15.7989	59.9665	0.725608	0.92707	2.23688	0.949661	3.60454
Tb11.01.2840	1075	hypothetical protein, conserved	0	17.2088	22.1632	14.4979	75.3906	25.5418	26.0638	1.2879	0.84247	4.38094	1.48424	1.51457
Tb11.01.2880	5147	Nucleoporin	Nucleo-cytoplasmic transport	18.0392	18.0908	240	112.183	126.191	43.1049	1.00286	13.3043	6.21881	6.99534	2.38951
Tb11.01.2885	4420	Nucleoporin	Nucleo-cytoplasmic transport	18.3273	30.937	240	30.5101	15.3175	12.6292	1.68803	13.0952	1.66473	0.835774	0.689094
Tb11.01.2886	525	N-acetyltransferase, putative	Enzyme	12.7206	14.6829	32.6822	39.3165	28.0109	14.8549	1.15426	2.56924	3.09077	2.20201	1.16779
Tb11.01.2900	1135	protein kinase, putative ,serine/threonine kinase, putative	Protein kinase	10.7542	13.8993	18.5665	44.3225	12.1931	9.92727	1.29246	1.72644	4.12142	1.1338	0.923108
Tb11.01.2910	613	hypothetical protein, conserved	0	12.971	12.3227	14.8042	11.2498	9.39118	9.42439	0.950025	1.14134	0.867305	0.724016	0.726576
Tb11.01.2920	1088	hypothetical protein, conserved	0	8.3146	12.1621	13.1417	11.2652	7.43978	7.78243	1.46274	1.58056	1.35487	0.894786	0.935996
Tb11.01.2930	3777	hypothetical protein	0	14.7381	20.9354	240	240	34.2528	23.9126	1.4205	16.2843	16.2843	2.3241	1.6225
Tb11.01.2940	986	U5 snRNP-specific 40 kDa protein, putative	RNA processing	8.03975	16.1505	9.48731	9.94781	7.84369	8.4976	2.00883	1.18005	1.23733	0.975614	1.05695
Tb11.01.2950	2208	sodium/sulphate symporter, putative	Lysosome	10.8151	17.7228	28.9046	21.7789	15.3082	19.9974	1.6387	2.67261	2.01375	1.41545	1.84902
Tb11.01.2960	771	hypothetical protein, conserved	0	11.0724	19.5434	17.8915	240	20.9061	11.8261	1.76505	1.61586	21.6754	1.88812	1.06807
Tb11.01.2970	553	hypothetical protein, conserved	0	10.9273	24.232	18.6303	17.4541	16.9985	12.9374	2.21756	1.70493	1.5973	1.5556	1.18395
Tb11.01.2990	1608	oligomeric golgi complex component 8, putative	Vesicular transport	9.30557	38.5727	9.20977	9.5758	7.92856	9.44462	4.14512	0.989706	1.02904	0.852024	1.01494
Tb11.01.3000	1185	paraflagellar rod component, putative	Cytoskeleton	20.2315	16.9769	240	240	22.6339	29.0018	0.839132	11.8627	11.8627	1.11874	1.43349
Tb11.01.3010	12916	dynein heavy chain, putative	Cytoskeleton	25.932	57.3634	240	26.4067	21.96	55.5074	2.21207	9.25498	1.01831	0.846831	2.1405
Tb11.01.3020	594	40S ribosomal protein L14, putative	Ribosome	120.157	40.4519	104.314	240	240	240	0.336657	0.868146	1.99738	1.99738	1.99738
Tb11.01.3030	705	hypothetical protein, conserved	0	13.5168	27.104	22.7894	240	35.1491	21.1739	2.00522	1.68601	17.7557	2.60041	1.56649
Tb11.01.3040	987	cytosolic malate dehydrogenase	Glucose & glycerol	42.5891	25.7198	240	240	240	35.6728	0.603905	5.63524	5.63524	5.63524	0.837604
Tb11.01.3050	1482	hypothetical protein, conserved	0	9.59945	15.7604	9.89425	12.2547	9.74845	12.1865	1.6418	1.03071	1.2766	1.01552	1.2695
Tb11.01.3060	1710	hypothetical protein, conserved	0	11.2948	17.2697	13.2866	13.3343	10.171	12.0178	1.52899	1.17635	1.18057	0.900501	1.06401
Tb11.01.3070	3131	hypothetical protein, conserved	0	11.6642	21.3152	135.591	14.7326	14.2191	17.1976	1.8274	11.6246	1.26306	1.21904	1.47439
Tb11.01.3080	2052	heat shock protein 70, putative	Chaperone	18.1114	36.5472	57.7356	240	47.15	24.0869	2.01791	3.1878	13.2513	2.60333	1.32993
Tb11.01.3085	590	hypothetical protein, conserved	0	9.72892	12.9121	11.4117	19.7793	10.5087	15.548	1.32719	1.17297	2.03304	1.08015	1.59812
Tb11.01.3090	1497	hypothetical protein, conserved	0	9.43982	13.9554	11.8494	10.2187	8.01003	8.62779	1.47836	1.25525	1.08251	0.848536	0.913978
Tb11.01.3100	1932	hypothetical protein, conserved	0	24.0026	12.8011	16.4921	22.8086	20.2193	13.3549	0.533319	0.687096	0.950256	0.842377	0.556392
Tb11.01.3110	2126	heat shock protein 70	Chaperone	20.757	63.5223	52.4475	240	85.9363	25.6533	3.06028	2.52674	11.5624	4.14011	1.23588
Tb11.01.3150	2400	gamma-tubulin complex subunit, putative ,spindle pole body component alp6, putative	Cytoskeleton	10.6492	29.8138	18.5099	16.6051	13.8056	14.2073	2.79964	1.73815	1.55929	1.29641	1.33413
Tb11.01.3160	1799	hypothetical protein, conserved	0	11.7772	16.0804	60.6574	76.9876	14.0854	9.06072	1.36538	5.15042	6.53701	1.19599	0.769346
Tb11.01.3170	1004	guanine nucleotide-binding protein beta subunit- like protein ,activated protein kinase c receptor	Translation	145.699	51.8469	49.8442	240	240	240	0.355848	0.342103	1.64723	1.64723	1.64723
Tb11.01.3180	1004	guanine nucleotide-binding protein beta subunit-like protein ,activated protein kinase c receptor	Translation	155.18	47.8507	57.3771	240	240	240	0.308356	0.369746	1.54659	1.54659	1.54659
Tb11.01.3190	1694	hypothetical protein, conserved	0	9.56485	13.8929	9.82082	12.091	10.5997	13.7916	1.45249	1.02676	1.2641	1.10819	1.44191
Tb11.01.3200	1570	hypothetical protein, conserved	0	9.98814	15.5878	24.7199	29.7108	10.7321	10.6923	1.56063	2.47492	2.97461	1.07448	1.0705
Tb11.01.3240	2503	trans-sialidase, putative	Membrane	210.539	31.2698	240	240	49.557	240	0.148522	1.13993	1.13993	0.235381	1.13993
Tb11.01.3260	3933	cullin 1, putative	Ubiquitin & proteasome	13.407	18.4216	117.238	24.9317	11.8512	12.0926	1.37403	8.74453	1.85961	0.883961	0.901966
Tb11.01.3270	3036	A/G-specific adenine glycosylase, putative	DNA synthesis, modification, repair	21.0305	17.1374	65.4976	240	28.1496	18.9647	0.814882	3.1144	11.412	1.33851	0.90177
Tb11.01.3280	2086	hypothetical protein, conserved	0	12.2818	35.3762	17.2646	14.2532	9.64486	10.021	2.88037	1.40571	1.16052	0.785296	0.815922
Tb11.01.3290	1892	hypothetical protein, conserved	0	20.8406	29.9311	240	42.3844	15.797	11.756	1.43619	11.516	2.03375	0.757996	0.564093
Tb11.01.3300	890	hypothetical protein, conserved	Mitochondrial translation	14.3979	15.6247	13.6254	12.3066	10.5356	9.96229	1.08521	0.946347	0.854748	0.731747	0.691927
Tb11.01.3320	3865	Trichohyalin, putative	0	104.195	28.4028	240	240	240	240	0.272594	2.30338	2.30338	2.30338	2.30338
Tb11.01.3340	2244	2,3-bisphosphoglycerate-independent phosphoglycerate mutase-like protein, putative	Glucose & glycerol	10.4808	240	13.0521	13.1512	9.35886	8.44446	22.899	1.24533	1.25479	0.892952	0.805707
Tb11.01.3350	2090	cyclin dependent kinase-binding protein, putative	Cell cycle	11.0959	24.7201	240	95.7523	20.7266	44.4416	2.22785	21.6295	8.62948	1.86794	4.00521
Tb11.01.3360	996	peroxisomal biogenesis factor 11 (PEX11) domain-containing protein	0	9.97228	14.8634	80.4806	40.9621	14.5675	13.0484	1.49048	8.07043	4.10759	1.4608	1.30847
Tb11.01.3370	694	glycosomal membrane protein, putative	Glycosome biogenesis	199.153	54.0935	240	240	240	88.6442	0.271618	1.2051	1.2051	1.2051	0.445106
Tb11.01.3380	2834	histone acetyltransferase, putative	Chromatin	13.2213	21.1556	18.2157	25.9103	24.7668	15.3891	1.60012	1.37776	1.95974	1.87325	1.16397
Tb11.01.3390	4619	DNA topoisomerase II, putative	DNA synthesis, modification, repair	27.7876	33.2834	240	48.7723	28.3725	35.2707	1.19778	8.63694	1.75518	1.02105	1.2693
Tb11.01.3400	2654	peroxisomal biogenesis factor 11 (PEX11) domain-containing protein	Translation	10.1707	18.9459	23.0069	17.7402	12.075	17.0195	1.86279	2.26207	1.74425	1.18724	1.67338
Tb11.01.3410	1544	hypothetical protein, conserved	0	11.9778	13.7605	31.0787	55.6984	16.3525	96.3657	1.14883	2.5947	4.65014	1.36524	8.04538
Tb11.01.3420	1811	eukaryotic translation initiation factor, putative	Translation	28.9261	21.3711	240	240	38.3976	46.1267	0.738817	8.29699	8.29699	1.32744	1.59464
Tb11.01.3470	5979	hypothetical protein, conserved	0	16.6013	159.478	240	14.4516	24.9414	240	9.60637	14.4567	0.870509	1.50238	14.4567
Tb11.01.3480	1781	hypothetical protein, conserved	0	10.8153	21.8393	15.0724	17.1962	8.49528	13.1829	2.01929	1.39361	1.58998	0.785485	1.21891
Tb11.01.3490	843	hypothetical protein, conserved	0	11.4939	16.1123	18.4176	34.0846	9.64645	9.90973	1.40182	1.60238	2.96545	0.839266	0.862172
Tb11.01.3500	774	hypothetical protein, conserved	Mitochondrial translation	10.8584	13.257	14.1775	10.4829	8.48865	11.8894	1.2209	1.30567	0.965412	0.781757	1.09495
Tb11.01.3510	2750	minichromosome maintenance (MCM) complex subunit, putative	DNA synthesis, modification, repair	12.638	34.279	89.992	20.2431	20.4433	53.9906	2.71236	7.12072	1.60176	1.6176	4.27207
Tb11.01.3520	3021	hypothetical protein, conserved	0	14.8969	24.5105	37.7397	13.8085	19.5626	23.5714	1.64534	2.53339	0.926933	1.3132	1.5823
Tb11.01.3530	1254	hypothetical protein, conserved	0	9.38073	26.6805	15.1343	23.1505	17.6709	14.9374	2.84418	1.61334	2.46788	1.88375	1.59235
Tb11.01.3540	1853	hypothetical protein, conserved	Glycan synthesis & metabolism	9.28887	39.3059	16.7194	18.3471	13.0007	17.0615	4.23151	1.79994	1.97517	1.3996	1.83677
Tb11.01.3550	1309	2-oxoglutarate dehydrogenase E2 component, putative	Citric acid cycle	78.5688	92.9075	240	240	93.4268	16.3675	1.1825	3.05465	3.05465	1.18911	0.208321
Tb11.01.3560	1520	vacuolar ATP synthase subunit b, putative ,v- ATPase B subunit ,vacuolar proton pump B subunit	Lysosome	52.8818	36.9773	240	240	36.94	31.5812	0.699244	4.53843	4.53843	0.698539	0.597205
Tb11.01.3570	1966	hypothetical protein, conserved	0	10.9515	17.734	22.7523	17.2643	14.3018	12.0177	1.61932	2.07755	1.57643	1.30593	1.09736
Tb11.01.3580	1074	hypothetical protein, conserved	0	18.7054	19.8692	174.43	67.257	33.0293	11.8545	1.06221	9.32508	3.59558	1.76576	0.633743
Tb11.01.3590	1876	FG-GAP repeat protein, putative ,intergrin alpha chain protein, putative	Cytoskeleton	9.59785	30.9888	51.5524	76.7046	8.82251	9.09514	3.22872	5.37124	7.99185	0.919218	0.947622
Tb11.01.3600	1558	MRP protein, putative	Transporter	112.275	32.8616	103.371	240	240	240	0.292689	0.920696	2.13762	2.13762	2.13762
Tb11.01.3610	1597	membrane-bound acid phosphatase, putative	Phosphatase	17.0466	15.2072	51.1076	49.5214	14.272	13.551	0.892094	2.99811	2.90506	0.837232	0.794936
Tb11.01.3620	1174	hypothetical protein, conserved	0	9.95885	10.8046	16.8974	19.0024	15.0142	9.67795	1.08492	1.69672	1.90809	1.50763	0.971794
Tb11.01.3630	1922	eukaryotic translation initiation factor 4e, putative	Translation	27.7797	20.9467	240	78.6922	25.418	24.084	0.754029	8.63941	2.83273	0.914984	0.866964
Tb11.01.3640	2823	acyl-CoA dehydrogenase, putative	Lipids & fatty acids	10.9043	16.0934	240	24.8371	12.2496	10.8607	1.47588	22.0097	2.27774	1.12338	0.996001
Tb11.01.3650	1810	hypothetical protein, conserved	0	11.7544	17.7516	20.4918	15.4917	8.46964	7.6812	1.5102	1.74333	1.31795	0.720548	0.653472
Tb11.01.3660	2439	DNA repair and recombination helicase protein PIF1, putative ,DNA repair and recombination protein, mitochondrial precursor, putative	Mitochondrial DNA	11.4817	15.6418	30.1754	29.8861	14.1448	12.7029	1.36233	2.62813	2.60294	1.23195	1.10637
Tb11.01.3670	3540	hypothetical protein, conserved	0	16.2292	36.404	240	18.4356	18.2341	10.3032	2.24312	14.7882	1.13596	1.12354	0.63486
Tb11.01.3675	479	40S ribosomal protein S17, putative	Ribosome	165.38	78.4686	240	240	240	240	0.474475	1.4512	1.4512	1.4512	1.4512
Tb11.01.3676	447	40S ribosomal protein S17, putative	Ribosome	169.084	83.9519	240	240	240	240	0.49651	1.41941	1.41941	1.41941	1.41941
Tb11.01.3680	409	hypothetical protein, conserved	0	9.82389	9.95044	11.3526	14.1415	8.16215	8.10449	1.01288	1.15561	1.4395	0.830847	0.824977
Tb11.01.3690	3471	splicing factor 3B subunit 1, putative	RNA processing	9.7441	21.8673	24.3865	17.8713	13.0697	17.6723	2.24416	2.5027	1.83407	1.3413	1.81364
Tb11.01.3700	2148	leucine-rich repeat protein (LRRP), putative	LRRP	12.169	#N/A	46.592	23.4682	12.9396	15.8137	#N/A	3.82874	1.92852	1.06332	1.2995
Tb11.01.3710	1099	hypothetical protein, conserved	Mitochondrial translation	11.0655	22.4982	13.5524	23.4495	14.7622	18.9625	2.03318	1.22474	2.11914	1.33407	1.71365
Tb11.01.3720	1637	hypothetical protein	0	14.3448	35.6347	240	36.7544	21.003	240	2.48415	16.7308	2.5622	1.46415	16.7308
Tb11.01.3730	2628	hypothetical protein, conserved	0	11.0418	44.2716	182.916	15.6228	11.8444	17.0029	4.00945	16.5657	1.41487	1.07269	1.53986
Tb11.01.3740	2637	coatomer gamma subunit, putative ,cytosolic coat protein, putative	Vesicular transport	27.2668	48.0963	240	240	20.2914	42.5873	1.76391	8.80192	8.80192	0.744181	1.56188
Tb11.01.3745	664	hypothetical protein, conserved	0	9.37277	17.1797	21.534	38.3346	11.4113	12.2917	1.83294	2.29751	4.09	1.21749	1.31142
Tb11.01.3750	2788	molybdenum cofactor biosynthesis protein, putative	Enzyme	17.2883	16.6497	40.6724	38.8684	15.2171	25.6283	0.963061	2.35259	2.24825	0.880195	1.48241
Tb11.01.3760	656	hypothetical protein, conserved	0	31.8848	17.4907	64.0328	240	65.7733	20.1161	0.54856	2.00826	7.5271	2.06284	0.630899
Tb11.01.3770	1186	protein phosphatase 2A, putative	Protein phosphatase	10.0104	20.4877	12.8791	24.0614	13.4241	15.5714	2.04664	1.28658	2.40365	1.34102	1.55552
Tb11.01.3780	1299	cytochrome oxidase assembly protein, putative	Mitochondrial electron transport	12.6792	18.4195	22.3935	26.0164	11.7879	20.5172	1.45274	1.76617	2.0519	0.929709	1.61818
Tb11.01.3790	979	hypothetical protein, conserved	0	17.6507	14.7561	37.8207	176.796	20.1397	177.598	0.836005	2.14273	10.0164	1.14101	10.0618
Tb11.01.3800	333	hypothetical protein	0	17.4922	16.252	17.9346	37.1231	15.4105	41.2782	0.929101	1.0253	2.12227	0.880994	2.35981
Tb11.01.3805	631	microtubule-associated protein ,corset-associated protein 15	Cytoskeleton	208.103	40.1042	240	240	240	147.286	0.192713	1.15328	1.15328	1.15328	0.707753
Tb11.01.3840	872	hypothetical protein, conserved	0	15.6802	16.9837	13.1267	240	14.6329	28.7652	1.08312	0.837148	15.3059	0.933205	1.83448
Tb11.01.3850	1170	hypothetical protein, conserved	0	14.021	13.9576	12.1289	77.1454	22.1007	217.482	0.995474	0.865053	5.50212	1.57626	15.5112
Tb11.01.3860	480	hypothetical protein, conserved	Mitochondrial pathway	35.3285	17.5407	80.2855	240	85.497	21.846	0.496501	2.27254	6.79338	2.42006	0.618368
Tb11.01.3870	2362	hypothetical protein, conserved	0	10.1325	15.6487	23.2928	18.5939	7.99756	9.68723	1.54441	2.29883	1.83508	0.789301	0.956059
Tb11.01.3880	951	hypothetical protein, conserved	0	9.5623	14.2629	20.0924	15.0631	11.1284	11.2323	1.49157	2.10121	1.57526	1.16378	1.17464
Tb11.01.3890	936	hypothetical protein, conserved	0	20.0963	10.5918	240	45.0575	8.02357	14.1764	0.527055	11.9425	2.24209	0.399257	0.705425
Tb11.01.3900	783	N-acetyl-D-glucosaminylphosphatidylinositol de-N-acetylase	GPI anchors & metabolism	9.84949	12.0348	7.99884	10.1279	8.6979	12.1039	1.22187	0.812108	1.02827	0.883081	1.22888
Tb11.01.3910	793	endonuclease III, putative	DNA synthesis, modification, repair	9.44483	17.2678	11.035	13.2664	9.34176	10.8783	1.82828	1.16836	1.40462	0.989087	1.15177
Tb11.01.3930	3940	RNA helicase, putative	RNA helicase	12.3204	33.7476	26.3194	18.1185	10.3664	14.6964	2.73916	2.13624	1.47061	0.841399	1.19285
Tb11.01.3940	838	RNA-binding protein, putative	RNA binding	73.6304	18.8095	240	146.47	54.0914	58.2133	0.255458	3.25952	1.98926	0.734634	0.790615
Tb11.01.3960	2276	flagellar protein essential for flagellar pocket biogenesis	Cytoskeleton	34.1095	20.5389	240	54.3356	39.1964	21.6944	0.602147	7.03617	1.59298	1.14913	0.636022
Tb11.01.3970	665	hypothetical protein, conserved	0	10.516	11.1638	23.699	21.9284	11.5445	15.9653	1.0616	2.2536	2.08523	1.0978	1.51819
Tb11.01.3980	1784	hypothetical protein, conserved	0	10.187	23.3122	13.9291	23.0633	11.1418	13.2406	2.28842	1.36734	2.26399	1.09372	1.29975
Tb11.01.3990	2751	kinesin, putative	Cytoskeleton	16.1413	38.5981	240	194.293	22.3786	80.4874	2.39127	14.8687	12.037	1.38643	4.98644
Tb11.01.4020	1782	hypothetical protein, conserved	0	9.17414	20.7265	13.0475	13.9859	9.59338	9.43557	2.25923	1.4222	1.52449	1.0457	1.0285
Tb11.01.4025	389	hypothetical protein, conserved	0	10.2597	15.6032	11.7103	30.1725	12.6513	11.5011	1.52083	1.1414	2.94089	1.23311	1.121
Tb11.01.4030	1037	hypothetical protein, conserved	0	109.561	27.0079	240	131.44	26.2616	19.5321	0.24651	2.19056	1.1997	0.239698	0.178275
Tb11.01.4040	2448	hypothetical protein, conserved	Acidocalcisome	10.7008	20.5062	31.8141	18.4952	11.6825	15.2535	1.91634	2.97307	1.7284	1.09175	1.42546
Tb11.01.4050	1741	heat shock protein HslVU, ATPase subunit HslU, putative ,ATP-dependent hsl protease ATP-binding subunit hslU, putative	Chaperone	8.39071	15.3023	50.5256	14.3394	9.2486	12.7057	1.82372	6.02161	1.70896	1.10224	1.51426
Tb11.01.4060	2468	ubiquitin carboxyl-terminal hydrolase, putative ,cysteine peptidase, Clan CA, family C19, putative	Ubiquitin & proteasome	13.2707	18.949	240	25.2695	15.6239	33.4555	1.42788	18.085	1.90416	1.17732	2.52101
Tb11.01.4070	2606	minichromosome maintenance (MCM) complex subunit, putative	DNA synthesis, modification, repair	11.3595	22.7081	17.06	12.9235	10.6775	11.2335	1.99904	1.50183	1.13768	0.939967	0.988908
Tb11.01.4080	1894	hypothetical protein, conserved	0	11.2691	19.7974	10.4626	19.8059	12.6712	33.403	1.75678	0.928429	1.75753	1.12441	2.96412
Tb11.01.4090	1744	hypothetical protein, conserved ,drug resistence protein, putative	Membrane	18.7389	17.3974	24.7415	21.7328	12.6168	11.81	0.928412	1.32033	1.15977	0.673297	0.630238
Tb11.01.4100	2181	hypothetical protein, conserved	0	15.3166	15.7259	22.4486	20.9302	11.9268	14.1295	1.02672	1.46564	1.36651	0.778685	0.922498
Tb11.01.4110	1525	hypothetical protein, conserved	0	24.0065	25.6293	33.286	53.1442	12.8021	28.0841	1.0676	1.38654	2.21374	0.533275	1.16985
Tb11.01.4120	607	hypothetical protein, conserved	0	12.5388	18.7719	17.7363	27.08	10.4141	19.2742	1.49711	1.41451	2.15969	0.830552	1.53716
Tb11.01.4130	2740	protein kinase, putative ,cdc2-related kinase, putative	Cell cycle	16.0815	30.5052	240	22.2354	15.02	48.8552	1.89691	14.9239	1.38266	0.933989	3.03797
Tb11.01.4140	3007	hypothetical protein, conserved	0	12.4171	20.6334	48.4034	80.9241	12.4909	50.7588	1.66169	3.89812	6.51714	1.00594	4.08781
Tb11.01.4160	968	hypothetical protein, conserved ,predicted Zinc finger, C3HC4 type (RING finger) protein	Ubiquitin & proteasome	10.758	13.2564	15.7169	10.7567	8.04929	9.5023	1.23223	1.46095	0.999873	0.748213	0.883276
Tb11.01.4170	2547	DNA photolyase, putative	DNA synthesis, modification, repair	15.7726	40.7593	24.1767	16.9998	9.7465	12.0189	2.58419	1.53283	1.0778	0.61794	0.762012
Tb11.01.4180	665	ankyrin repeat protein, putative	Cytoskeleton	10.1114	23.4813	16.2034	20.7827	9.03855	18.9041	2.32226	1.60249	2.05537	0.893895	1.86958
Tb11.01.4190	1412	hypothetical protein, conserved	0	10.455	20.6668	16.4961	32.7496	14.3889	15.8183	1.97673	1.57781	3.13243	1.37627	1.51299
Tb11.01.4200	1349	hypothetical protein, conserved	0	10.078	12.922	16.6429	22.5331	11.5212	21.4362	1.2822	1.65141	2.23587	1.1432	2.12704
Tb11.01.4210	3489	hypothetical protein, conserved	0	13.4374	43.4017	44.9778	20.8125	13.6534	33.552	3.22992	3.34721	1.54885	1.01608	2.49691
Tb11.01.4220	2216	hypothetical protein, conserved	0	14.4777	19.4908	240	30.175	17.0127	19.0962	1.34626	16.5772	2.08424	1.1751	1.31901
Tb11.01.4230	2843	protein kinase, putative	Protein kinase	47.4432	27.7908	240	47.8529	36.4893	34.029	0.585771	5.05869	1.00864	0.769117	0.717258
Tb11.01.4250	2630	protein kinase, putative	Protein kinase	35.4142	26.3628	240	45.3294	36.2977	48.8104	0.744414	6.77694	1.27998	1.02495	1.37827
Tb11.01.4270	2494	cell division cycle phosphatase 14, putative	Cell cycle	14.9343	26.1658	240	25.1642	14.9957	19.8721	1.75206	16.0703	1.68499	1.00411	1.33063
Tb11.01.4280	1224	hypothetical protein, conserved	0	13.2224	16.1066	30.876	27.4442	13.5433	17.4118	1.21813	2.33513	2.07559	1.02427	1.31684
Tb11.01.4290	2352	hypothetical protein, conserved	0	12.0971	22.653	14.3799	21.2739	14.1359	15.8821	1.87259	1.1887	1.75859	1.16854	1.31288
Tb11.01.4300	3277	hypothetical protein, conserved	0	14.5647	18.4728	240	34.8853	18.7698	30.597	1.26833	16.4782	2.39519	1.28872	2.10076
Tb11.01.4310	6878	hypothetical protein, conserved	0	14.0662	63.021	80.4364	21.5031	17.9079	45.1281	4.48031	5.71841	1.52871	1.27311	3.20826
Tb11.01.4320	2109	kinetoplastid-specific phospho-protein phosphatase, putative	Protein phosphatase	11.2332	33.5112	32.055	13.1016	10.8645	12.1048	2.98323	2.8536	1.16633	0.967178	1.07759
Tb11.01.4330	1662	hypothetical protein, conserved	0	10.6095	24.7367	36.0167	25.9559	11.8989	15.232	2.33157	3.39477	2.44648	1.12154	1.4357
Tb11.01.4340	1181	hypothetical protein, conserved	0	9.97747	19.2702	60.0091	45.0043	19.1637	13.2324	1.93138	6.01446	4.5106	1.92069	1.32623
Tb11.01.4350	2536	hypothetical protein, conserved	0	14.1466	19.6469	27.8724	18.2756	12.9503	44.7988	1.38881	1.97025	1.29187	0.915434	3.16674
Tb11.01.4360	1311	hypothetical protein, conserved	0	10.6746	17.4423	10.0271	16.8811	9.80085	11.9184	1.634	0.93934	1.58143	0.918146	1.11652
Tb11.01.4370	2421	hypothetical protein, conserved	0	26.6909	19.5523	240	39.1288	24.807	60.1673	0.732545	8.99183	1.466	0.92942	2.25423
Tb11.01.4380	1338	hypothetical protein	0	17.3557	28.9055	240	77.7095	33.8697	48.9258	1.66548	13.8283	4.47747	1.95151	2.81901
Tb11.01.4390	1935	leucine-rich repeat protein (LRRP), putative	LRRP	13.4395	#N/A	240	17.2365	21.7099	10.4207	#N/A	17.8577	1.28252	1.61538	0.775379
Tb11.01.4400	2580	hypothetical protein	0	16.1458	40.1145	240	34.6318	24.7707	25.3429	2.48452	14.8645	2.14494	1.53419	1.56963
Tb11.01.4410	914	kinetoplastid-specific dual specificity phosphatase, putative	Phosphatase	12.5362	23.3235	22.55	25.4677	17.222	15.6871	1.86049	1.79879	2.03154	1.37378	1.25134
Tb11.01.4420	1290	hypothetical protein, conserved	0	16.8512	21.7851	240	39.4828	24.7573	9.58328	1.29279	14.2423	2.34302	1.46917	0.568699
Tb11.01.4430	1863	hypothetical protein, conserved	0	15.4948	19.0834	27.7916	150.994	38.6783	15.8678	1.2316	1.7936	9.74481	2.4962	1.02407
Tb11.01.4440	2705	ATP-dependent DNA helicase, putative	DNA synthesis, modification, repair	11.3324	17.9498	33.3618	39.1892	15.9279	17.2144	1.58394	2.94393	3.45815	1.40551	1.51904
Tb11.01.4450	1167	cyclin 1 ,serine peptidase family S51, peptidase E, putative	Cell cycle	9.05948	18.9697	11.3959	13.2298	10.1916	11.1032	2.09391	1.25789	1.46033	1.12496	1.22559
Tb11.01.4460	2409	hypothetical protein, conserved	0	12.633	19.8728	67.3174	240	20.7414	28.8778	1.57308	5.32868	18.9978	1.64183	2.28589
Tb11.01.4470	1799	hypothetical protein, conserved	0	9.64778	22.2271	8.43604	10.2054	8.92989	8.86607	2.30386	0.874403	1.0578	0.92559	0.918976
Tb11.01.4480	3134	hypothetical protein, conserved	0	13.5604	15.934	240	22.4312	19.5537	39.0424	1.17504	17.6986	1.65417	1.44197	2.87916
Tb11.01.4490	1429	hypothetical protein, conserved ,Zinc finger DHHC domain containing transmembrane protein, putative	Lipids & fatty acids	10.1407	36.2834	26.2721	20.1489	11.5515	11.0923	3.578	2.59076	1.98693	1.13913	1.09384
Tb11.01.4500	2401	hypothetical protein, conserved	0	10.036	17.7554	22.4918	13.18	12.9312	15.2082	1.76917	2.24111	1.31327	1.28848	1.51537
Tb11.01.4510	1103	hypothetical protein, conserved	0	11.4056	14.1096	11.2483	10.6651	13.2727	7.79477	1.23707	0.986203	0.93507	1.1637	0.683413
Tb11.01.4520	503	prefoldin subunit 2, putative	Chaperone	18.0487	12.1627	30.0721	240	54.5259	18.706	0.673878	1.66616	13.2973	3.02104	1.03642
Tb11.01.4530	1128	hypothetical protein, conserved	0	13.5644	13.1231	11.6142	12.0403	10.8688	25.229	0.967465	0.856229	0.887639	0.801275	1.85994
Tb11.01.4550	453	hypothetical protein, conserved	0	16.3943	16.0697	53.0212	115.297	13.251	240	0.980203	3.23412	7.03278	0.808271	14.6392
Tb11.01.4570	2790	hypothetical protein, conserved	0	13.266	27.8908	34.7856	22.084	17.2673	14.1566	2.10243	2.62215	1.6647	1.30162	1.06714
Tb11.01.4580	1147	hypothetical protein	0	11.973	33.172	34.3101	60.3278	15.6291	9.18304	2.77056	2.86561	5.03864	1.30536	0.766977
Tb11.01.4590	1076	hypothetical protein, conserved	Mitochondrial biogenesis	12.9269	14.3941	14.087	20.5233	17.2643	12.998	1.11351	1.08975	1.58765	1.33554	1.0055
Tb11.01.4600	1000	cleavage and polyadenylation specificity factor 30 kDa subunit ,CPSF 30 kDa subunit ,NS1 effector domain- binding protein 1	RNA processing	9.66808	28.1899	12.2797	22.8776	11.3155	10.0597	2.91576	1.27013	2.3663	1.1704	1.0405
Tb11.01.4610	1734	hypothetical protein, conserved	0	10.2491	22.6798	16.2338	15.8688	10.6384	11.9619	2.21285	1.58391	1.54831	1.03798	1.16711
Tb11.01.4620	7282	ubiquitin ligase, putative	Ubiquitin & proteasome	23.8914	21.4373	240	240	26.9197	27.4724	0.897278	10.0454	10.0454	1.12675	1.14989
Tb11.01.4621	515	calmodulin	Calcium	141.418	32.2881	240	240	240	240	0.228316	1.69709	1.69709	1.69709	1.69709
Tb11.01.4622	515	calmodulin	Calcium	140.979	32.3033	240	240	240	240	0.229137	1.70239	1.70239	1.70239	1.70239
Tb11.01.4623	515	calmodulin	Calcium	148.557	32.5372	240	240	240	240	0.219022	1.61555	1.61555	1.61555	1.61555
Tb11.01.4624	499	calmodulin	Calcium	156.327	31.118	240	240	240	240	0.199057	1.53524	1.53524	1.53524	1.53524
Tb11.01.4625	591	hypothetical protein	0	7.51433	12.1467	22.3747	12.5413	6.56581	7.00218	1.61648	2.9776	1.66898	0.873772	0.931843
Tb11.01.4630	3418	hypothetical protein, conserved	Translation	11.3754	37.3534	46.3997	15.1225	13.0724	13.7787	3.28369	4.07895	1.32941	1.14918	1.21127
Tb11.01.4640	1683	hypothetical protein, conserved	0	12.8484	21.1205	31.32	22.4366	11.6226	14.1136	1.64383	2.43767	1.74626	0.904595	1.09847
Tb11.01.4650	1673	hypothetical protein, conserved	0	15.9052	17.0476	17.7636	23.7961	11.923	15.6724	1.07182	1.11684	1.49612	0.74963	0.985364
Tb11.01.4660	1327	elongation factor 1 gamma, putative	Translation	94.7548	37.703	240	240	240	128.32	0.397901	2.53285	2.53285	2.53285	1.35424
Tb11.01.4680	1086	hypothetical protein, conserved	0	10.1928	22.4979	10.0712	12.3724	9.76113	9.95195	2.20723	0.988068	1.21384	0.957646	0.976367
Tb11.01.4690	2239	hypothetical protein, conserved	0	115.644	37.6078	240	240	72.3155	240	0.325203	2.07533	2.07533	0.625327	2.07533
Tb11.01.4700	939	hypothetical protein, conserved	0	12.7832	20.0407	11.8298	40.451	11.0047	21.0902	1.56774	0.925421	3.16439	0.860876	1.64984
Tb11.01.4701	2690	membrane-bound acid phosphatase 1 precursor	Phosphatase	15.6585	19.9601	36.5959	65.4875	14.5706	15.6276	1.27471	2.33712	4.18223	0.930524	0.998025
Tb11.01.4702	2095	cytochrome oxidase subunit X	Mitochondrial electron transport	13.7867	22.7587	35.1594	145.975	12.6278	14.0177	1.65078	2.55025	10.5881	0.915941	1.01676
Tb11.01.4703	752	hypothetical protein, conserved	0	10.3888	14.9778	52.0253	85.7938	10.4002	13.0413	1.44172	5.00782	8.25829	1.0011	1.25532
Tb11.01.4720	1373	hypothetical protein, conserved	0	14.6598	23.1389	11.8788	15.134	11.1685	16.3185	1.5784	0.810298	1.03235	0.761847	1.11315
Tb11.01.4740	1936	hypothetical protein, conserved	0	31.9004	30.3441	240	95.2316	28.8105	21.8068	0.951216	7.52342	2.98528	0.903141	0.683591
Tb11.01.4750	1599	elongation factor 1 gamma, putative	Translation	94.2494	39.7612	240	240	240	126.349	0.421872	2.54644	2.54644	2.54644	1.34058
Tb11.01.4760	1714	hypothetical protein, conserved	0	13.2519	21.4232	240	49.8477	12.6502	15.0616	1.61661	18.1106	3.76155	0.954596	1.13656
Tb11.01.4780	1096	hypothetical protein, conserved	0	10.6611	16.3388	12.9529	15.6895	11.5452	11.9135	1.53257	1.21497	1.47166	1.08293	1.11748
Tb11.01.4790	2743	phospholipid:diacylglycerol acyltransferase-like protein	Lipids & fatty acids	11.2568	22.2236	240	24.7304	11.7764	11.1256	1.97424	21.3205	2.19694	1.04616	0.98835
Tb11.01.4810	836	hypothetical protein, conserved	Cytoskeleton	84.2322	27.7392	240	145.229	44.0511	27.6369	0.329319	2.84927	1.72416	0.522973	0.328104
Tb11.01.4820	2146	RNA polymerase subunit, putative	RNA synthesis I	18.9175	16.9487	60.0274	103.438	22.1286	15.8273	0.895931	3.17312	5.46784	1.16974	0.836649
Tb11.01.4830	1565	eukaryotic translation initiation factor 2 gamma, putative	Translation	33.6621	22.9765	240	240	240	25.0936	0.682563	7.12969	7.12969	7.12969	0.745456
Tb11.01.4840	1328	hypothetical protein, conserved	0	11.776	16.9594	240	221.421	12.4771	12.8608	1.44016	20.3804	18.8027	1.05953	1.09212
Tb11.01.4850	1436	hypothetical protein, conserved	0	76.9084	33.1772	240	240	55.3001	240	0.431386	3.12059	3.12059	0.719038	3.12059
Tb11.01.4860	900	mitochondrial RNA binding protein 2	Mitochondrial RNA	30.7087	27.6692	240	240	240	22.4225	0.901022	7.81537	7.81537	7.81537	0.730166
Tb11.01.4870	676	mitochondrial import inner membrane translocase subunit tim17	Mitochondrial biogenesis	22.0345	17.374	240	240	25.5587	9.00033	0.788491	10.892	10.892	1.15994	0.408466
Tb11.01.4880	672	hypothetical protein, conserved	0	22.2606	15.2443	240	111.739	24.3865	12.7481	0.684811	10.7814	5.0196	1.0955	0.572676
Tb11.01.4890	917	hypothetical protein, conserved	0	13.035	12.4017	8.51581	13.1853	8.72897	7.7636	0.95141	0.653301	1.01153	0.669655	0.595595
Tb11.01.4900	3215	hypothetical protein, conserved	0	13.4485	28.0448	14.6915	17.6423	15.0213	10.7288	2.08534	1.09242	1.31184	1.11695	0.797767
Tb11.01.4910	1349	hypothetical protein, conserved	0	11.1352	13.374	25.4131	21.7467	10.7336	15.7129	1.20107	2.28224	1.95297	0.96394	1.41111
Tb11.01.4920	2625	hypothetical protein, conserved	0	17.8814	22.2208	72.5123	22.4858	9.9457	14.1575	1.24268	4.05519	1.2575	0.556204	0.791747
Tb11.01.4930	2448	hypothetical protein, conserved	0	16.0141	20.9942	45.3805	35.47	25.55	18.27	1.31098	2.83379	2.21492	1.59547	1.14087
Tb11.01.4940	4078	AAA ATPase, putative	Enzyme	18.7816	29.125	240	33.5122	19.7367	50.9395	1.55072	12.7785	1.78431	1.05085	2.7122
Tb11.01.4950	933	hypothetical protein, conserved	0	12.6371	17.8622	15.069	12.851	11.4042	13.4552	1.41347	1.19245	1.01693	0.902443	1.06474
Tb11.01.4960	6338	regulator of nonsense transcripts 1, putative ,nonsense mRNA reducing factor 1, putative	Enzyme	19.0172	28.9505	240	55.1895	27.1875	240	1.52234	12.6202	2.90209	1.42963	12.6202
Tb11.01.4990	594	hypothetical protein, conserved	0	10.4309	19.4245	12.0565	14.2398	16.9346	18.0455	1.86221	1.15585	1.36516	1.62351	1.73001
Tb11.01.5000	2006	hypothetical protein, conserved	0	11.971	15.4922	240	17.5385	10.6455	13.7242	1.29414	20.0484	1.46508	0.889276	1.14645
Tb11.01.5010	846	hypothetical protein, conserved	0	10.3322	14.1983	10.9806	15.3516	13.0756	12.5525	1.37419	1.06275	1.4858	1.26552	1.2149
Tb11.01.5020	1331	hypothetical protein, conserved	0	9.47796	15.9731	11.9422	11.5554	8.60401	10.8613	1.68529	1.26	1.21918	0.907792	1.14595
Tb11.01.5030	468	hypothetical protein	0	13.1351	19.29	13.3345	11.1564	9.40125	12.9153	1.46858	1.01518	0.849355	0.715733	0.98326
Tb11.01.5040	1045	mitochondrial carrier protein, putative	Mitochondrial pathway	10.4766	23.0421	13.0633	14.6558	12.5335	11.1887	2.1994	1.24691	1.39891	1.19633	1.06797
Tb11.01.5050	904	hypothetical protein, conserved	0	13.4741	20.0039	240	240	27.7637	12.2731	1.48462	17.8119	17.8119	2.06052	0.910868
Tb11.01.5060	1655	hypothetical protein, conserved	0	13.153	27.2554	94.2991	24.4698	10.0461	21.6562	2.07219	7.16942	1.8604	0.763787	1.64649
Tb11.01.5070	718	hypothetical protein, conserved	0	9.59144	15.0526	27.2641	61.5222	11.3375	12.2884	1.56938	2.84254	6.41429	1.18204	1.28118
Tb11.01.5080	917	hypothetical protein, conserved	0	11.1948	23.3399	10.72	10.3715	7.7095	8.5375	2.08488	0.957585	0.926458	0.688668	0.762632
Tb11.01.5090	2140	hypothetical protein, conserved	0	32.8189	25.1147	240	50.085	37.9517	16.4684	0.76525	7.31286	1.5261	1.1564	0.501796
Tb11.01.5100	2184	par1	Cytoskeleton	74.5065	39.7498	240	240	59.3066	26.2397	0.533508	3.2212	3.2212	0.795993	0.352181
Tb11.01.5110	590	hypothetical protein, conserved	0	12.5534	14.4128	15.2981	22.9553	10.6474	10.8618	1.14812	1.21865	1.82862	0.848174	0.865247
Tb11.01.5120	3063	hypothetical protein, conserved	0	28.1818	27.8303	240	68.9434	21.2368	25.1976	0.987528	8.51615	2.44638	0.753565	0.89411
Tb11.01.5130	773	hypothetical protein, conserved	0	9.44251	16.8129	17.0447	19.891	9.40492	9.72632	1.78056	1.8051	2.10654	0.996019	1.03006
Tb11.01.5140	1938	hypothetical protein, conserved	0	13.0134	18.2084	18.5759	17.7574	10.2137	13.6975	1.3992	1.42744	1.36455	0.784861	1.05256
Tb11.01.5150	1966	hypothetical protein, conserved	0	12.919	15.0462	22.8088	26.2132	12.8744	19.0319	1.16466	1.76553	2.02905	0.996551	1.47318
Tb11.01.5160	1806	hypothetical protein, conserved	0	18.7918	39.7704	12.4326	13.7204	12.2365	10.5313	2.11638	0.661598	0.730128	0.651162	0.56042
Tb11.01.5170	419	hypothetical protein, conserved	0	49.6724	13.1381	72.4176	240	240	48.6791	0.264495	1.4579	4.83166	4.83166	0.980004
Tb11.01.5180	1035	ubiquinone biosynthesis protein-like protein	Mitochondrial pathway	10.25	10.1934	12.273	12.9152	8.12341	12.4209	0.994483	1.19737	1.26002	0.792531	1.2118
Tb11.01.5190	1242	hypothetical protein, conserved	0	8.85875	12.1578	9.47359	9.87277	8.80789	6.54865	1.3724	1.0694	1.11447	0.994258	0.739229
Tb11.01.5195	561	hypothetical protein, conserved	0	16.3406	16.2303	240	240	32.6499	14.1689	0.99325	14.6874	14.6874	1.99809	0.867101
Tb11.01.5200	531	hypothetical protein, conserved	0	8.22089	12.9835	12.7171	14.2813	8.57974	8.60512	1.57934	1.54692	1.7372	1.04365	1.04674
Tb11.01.5220	2520	J-binding protein	Chromatin	12.9225	18.2525	240	26.7444	11.0826	22.9441	1.41246	18.5723	2.0696	0.857622	1.77552
Tb11.01.5225	448	cytochrome b5, putative	Mitochondrial electron transport	9.86927	15.2832	19.7973	15.4504	10.0484	6.56661	1.54857	2.00595	1.56551	1.01815	0.665359
Tb11.01.5235	446	hypothetical protein, conserved	0	9.00461	19.9457	29.92	80.0269	8.83148	11.5911	2.21506	3.32275	8.88733	0.980773	1.28724
Tb11.01.5240	4908	hypothetical protein, conserved	0	20.0535	36.0012	240	19.354	22.898	42.4504	1.79526	11.968	0.965118	1.14185	2.11686
Tb11.01.5250	1069	hypothetical protein, conserved	0	9.51361	11.745	10.3857	10.4377	9.07975	10.0018	1.23455	1.09167	1.09714	0.954396	1.05131
Tb11.01.5260	1502	radial spoke protein RSP11, putative	Cytoskeleton	12.6279	16.3303	240	163.793	22.8148	11.5913	1.29319	19.0056	12.9707	1.8067	0.917916
Tb11.01.5270	2274	hypothetical protein, conserved	0	14.4606	13.3084	240	67.2969	32.0847	27.0699	0.920324	16.5969	4.65382	2.21877	1.87198
Tb11.01.5280	639	hypothetical protein, conserved	0	10.7214	13.4206	29.4792	26.6647	12.6724	11.6917	1.25175	2.74955	2.48704	1.18197	1.0905
Tb11.01.5300	1338	ornithine decarboxylase	Redox pathways	46.1984	25.9055	240	240	56.2718	39.0172	0.560744	5.19498	5.19498	1.21805	0.844557
Tb11.01.5310	4768	receptor-type adenylate cyclase GRESAG 4, putative	GRESAG	14.345	#N/A	123.486	30.5543	17.4785	16.3497	#N/A	8.60827	2.12995	1.21844	1.13975
Tb11.01.5320	1177	small GTPase, putative ,ras-related rab-4	Vesicular transport	10.5015	15.9747	55.0447	15.1439	12.4867	13.3364	1.52118	5.2416	1.44207	1.18904	1.26995
Tb11.01.5330	822	hypothetical protein, conserved	0	10.3012	14.5128	39.7257	14.9393	10.5156	9.42863	1.40886	3.85643	1.45025	1.02082	0.915298
Tb11.01.5340	1182	hypothetical protein, conserved	0	10.5954	15.1873	240	55.2291	8.75858	13.2725	1.43338	22.6513	5.21255	0.826639	1.25267
Tb11.01.5350	517	profilin	Cytoskeleton_Actin	37.3243	36.0603	83.2863	240	240	240	0.966134	2.23142	6.43012	6.43012	6.43012
Tb11.01.5355	934	hypothetical protein, conserved	0	13.0995	14.2894	33.1414	240	27.8463	25.5242	1.09084	2.52998	18.3213	2.12576	1.94849
Tb11.01.5365	1316	hypothetical protein, conserved	0	13.3928	16.2236	35.5996	57.2914	23.5724	13.2367	1.21137	2.65812	4.27779	1.76009	0.988351
Tb11.01.5370	1685	ATP-dependent DEAD/H RNA helicase, putative ,ATP- dependent RNA helicase, putative	rRNA-tRNA processing	9.32027	13.4993	14.4365	13.8342	10.5649	16.6905	1.44838	1.54893	1.48431	1.13354	1.79078
Tb11.01.5380	1693	hypothetical protein, conserved	0	10.0941	12.2737	25.4904	24.8824	15.0427	24.3743	1.21594	2.52529	2.46505	1.49026	2.41472
Tb11.01.5390	963	hypothetical protein, conserved	Mitochondrial pathway	8.83572	14.3685	15.1758	9.55584	8.65522	10.3242	1.62619	1.71755	1.0815	0.979571	1.16846
Tb11.01.5400	2163	hypothetical protein, conserved	0	10.0827	14.5061	16.0723	16.2989	9.32583	11.9238	1.4387	1.59404	1.61651	0.92493	1.18259
Tb11.01.5410	1026	hypothetical protein, conserved	0	8.86324	13.2778	9.27817	10.5227	7.6707	9.64312	1.49808	1.04682	1.18723	0.865451	1.08799
Tb11.01.5420	836	hypothetical protein, conserved	0	9.36813	18.874	8.60387	8.72089	7.6724	10.7697	2.01471	0.918419	0.93091	0.81899	1.14961
Tb11.01.5440	599	hypothetical protein, conserved	0	10.7821	23.7247	77.3994	240	10.0236	13.9022	2.20037	7.17848	22.259	0.929647	1.28937
Tb11.01.5450	1689	kinetoplastid-specific protein tyrosine phosphatase, putative	Protein phosphatase	28.0697	16.5386	26.9805	240	13.2119	11.3451	0.589197	0.961194	8.55013	0.470682	0.404175
Tb11.01.5460	813	hypothetical protein, conserved	0	10.0597	16.324	7.17125	8.79235	8.27839	8.805	1.62271	0.712872	0.87402	0.822929	0.875278
Tb11.01.5470	595	centrin, putative	Cell cycle	8.29714	18.2665	52.2604	37.8177	8.75839	12.0157	2.20154	6.29861	4.55792	1.05559	1.44817
Tb11.01.5480	858	hypothetical protein, conserved	Mitochondrial pathway	9.57703	17.574	7.82682	9.28859	9.0354	7.99236	1.83502	0.817249	0.969882	0.943445	0.834534
Tb11.01.5490	3348	kinesin-II 85 Kd subunit, putative	Cytoskeleton	17.5333	23.1753	240	34.5851	21.4049	39.5545	1.32179	13.6883	1.97254	1.22081	2.25597
Tb11.01.5500	684	U3 small nucleolar ribonucleoprotein protein IMP3, putative	RNA processing	8.25036	10.8248	9.86415	11.1088	8.13583	9.51558	1.31204	1.1956	1.34647	0.986118	1.15335
Tb11.01.5510	862	ubiquitin-conjugating enzyme e2, putative ,ubiquitin carrier protein, putative ,ubiquitin-protein ligase, putative	Ubiquitin & proteasome	19.2563	20.2866	240	240	21.8261	9.80154	1.0535	12.4634	12.4634	1.13345	0.509003
Tb11.01.5530	1952	hypothetical protein, conserved	0	17.5771	16.9883	14.9153	39.59	24.7469	14.7497	0.9665	0.848565	2.25235	1.4079	0.839139
Tb11.01.5535	384	U6 snRNA-associated Sm-like protein LSm4p	RNA processing	7.36049	12.4059	11.1465	15.7372	7.10886	6.43849	1.68547	1.51437	2.13806	0.965813	0.874737
Tb11.01.5540	1588	Pab1p-dependent poly(A) ribonuclease subunit, putative ,PAN3	RNA degradation	10.2895	22.6365	16.241	9.99331	8.39439	7.81271	2.19996	1.5784	0.971213	0.81582	0.759289
Tb11.01.5550	1615	hypothetical protein, conserved	0	11.4515	12.0475	61.2374	24.569	11.8568	10.8422	1.05204	5.34753	2.14548	1.03539	0.946787
Tb11.01.5560	1077	GDP-L-fucose synthetase, putative	Glycan synthesis & metabolism	9.87763	28.2752	12.4534	14.9403	11.9636	11.0885	2.86255	1.26077	1.51254	1.21118	1.12259
Tb11.01.5570	972	RNA-binding protein	rRNA-tRNA processing	83.668	36.647	240	240	179.279	240	0.438005	2.86848	2.86848	2.14274	2.86848
Tb11.01.5580	759	hypothetical protein, conserved	0	10.1774	18.1267	12.1815	13.8861	9.52525	8.65839	1.78107	1.19692	1.36441	0.935925	0.850749
Tb11.01.5590	896	RNA-binding protein	rRNA-tRNA processing	98.4546	43.2943	240	240	178.497	240	0.439739	2.43767	2.43767	1.81298	2.43767
Tb11.01.5600	899	cyclin 9 ,cyclin C-like, putative (pers. comm. J. Mottram, Univ. of Glasgow)	Cell cycle	8.66092	15.6125	7.519	9.61616	8.39155	11.451	1.80263	0.868152	1.11029	0.968898	1.32215
Tb11.01.5610	3747	hypothetical protein, conserved	0	11.6245	23.8368	14.5365	17.6979	13.212	16.258	2.05056	1.2505	1.52246	1.13657	1.39859
Tb11.01.5630	510	hypothetical protein, conserved	0	9.66142	15.0623	15.79	10.9144	8.15573	8.16489	1.55902	1.63433	1.12969	0.844155	0.845103
Tb11.01.5640	1339	hypothetical protein, conserved	0	10.2137	16.7235	13.5716	18.431	11.1237	10.1113	1.63737	1.32877	1.80455	1.0891	0.989975
Tb11.01.5650	3629	protein kinase, putative	Protein kinase	12.7065	30.2855	240	31.7024	11.4971	32.9845	2.38347	18.888	2.49498	0.90482	2.59588
Tb11.01.5660	1461	cyclin 2 ,G1 cyclin	Cell cycle	45.6746	22.8562	240	76.4276	22.7541	#N/A	0.500414	5.25456	1.67331	0.498179	#N/A
Tb11.01.5680	1760	hypothetical protein, conserved	0	183.458	35.9785	240	54.5886	36.5564	14.2328	0.196113	1.3082	0.297554	0.199263	0.0775808
Tb11.01.5690	3112	DRBD4	RNA binding	56.7469	49.1137	240	22.6607	24.6581	13.1481	0.865487	4.22931	0.39933	0.434529	0.231697
Tb11.01.5700	2291	hypothetical protein, conserved	RNA synthesis II	20.2284	19.2945	21.4398	45.3543	62.3698	13.6646	0.953833	1.05989	2.24211	3.08328	0.675517
Tb11.01.5710	1545	phenylalanyl-tRNA synthetase alpha chain, putative	Translation tRNA	11.1025	15.9204	138.431	43.8164	14.5168	11.038	1.43394	12.4684	3.94652	1.30752	0.994186
Tb11.01.5720	563	ribosomal protein L18, putative	Ribosome	240	50.2123	240	240	240	240	0.209218	1	1	1	1
Tb11.01.5730	1931	ethanolamine-phosphate cytidylyltransferase	GPI anchors & metabolism	37.6417	26.2388	240	194.099	29.0212	13.4224	0.697067	6.37591	5.15649	0.770986	0.356584
Tb11.01.5740	686	hypothetical protein, conserved	0	11.225	16.8056	8.77171	13.2104	7.84091	7.22392	1.49716	0.781444	1.17687	0.698522	0.643556
Tb11.01.5750	1186	hypothetical protein, conserved	0	11.7292	18.838	25.4494	32.8884	11.6188	13.6553	1.60608	2.16974	2.80397	0.990585	1.16421
Tb11.01.5760	1885	hypothetical protein, conserved	0	9.46515	17.3516	10.2518	12.9907	8.70944	8.62191	1.83321	1.08311	1.37248	0.920159	0.910912
Tb11.01.5770	2898	hypothetical protein, conserved	0	11.8076	20.419	88.6888	19.2646	14.6102	19.2577	1.72931	7.51116	1.63154	1.23735	1.63096
Tb11.01.5780	2937	hypothetical protein, conserved	0	78.0593	45.1084	240	240	61.4798	20.4219	0.577873	3.07459	3.07459	0.787604	0.26162
Tb11.01.5790	839	ubiquitin-conjugating enzyme e2, putative ,ubiquitin carrier protein, putative ,ubiquitin-protein ligase, putative	Ubiquitin & proteasome	14.9621	13.5318	240	40.4668	12.1699	13.4145	0.904404	16.0405	2.70462	0.813381	0.896564
Tb11.01.5800	4515	hypothetical protein, conserved	0	17.6344	31.4346	240	20.6851	14.0779	21.6366	1.78257	13.6097	1.173	0.798317	1.22695
Tb11.01.5820	2583	hypothetical protein, conserved	0	102.133	33.7531	240	118.32	16.8953	#N/A	0.330481	2.34988	1.15849	0.165424	#N/A
Tb11.01.5840	2048	hypothetical protein, conserved	0	12.458	16.3523	33.1822	27.3708	19.1513	16.2378	1.3126	2.66353	2.19705	1.53727	1.3034
Tb11.01.5850	3186	hypothetical protein, conserved	0	10.5825	25.2771	41.4071	15.6697	12.2088	16.0994	2.38858	3.91279	1.48072	1.15368	1.52133
Tb11.01.5860	1657	T-complex protein 1, epsilon subunit, putative	Translation	53.0602	40.5468	240	240	191.758	21.5158	0.764165	4.52316	4.52316	3.61396	0.405498
Tb11.01.5870	1166	atypical dual specificity phosphatase, putative	Phosphatase	9.63201	14.3606	9.22949	10.2007	7.07463	6.40891	1.49093	0.95821	1.05904	0.734491	0.665376
Tb11.01.5880	2381	protein kinase, putative	Protein kinase	11.3874	15.1135	22.7116	19.8858	17.3391	15.3319	1.32721	1.99445	1.7463	1.52265	1.34639
Tb11.01.5890	789	septum formation protein MAF homologue, putative	0	20.3929	15.831	240	240	55.3904	37.8304	0.776299	11.7688	11.7688	2.71616	1.85507
Tb11.01.5900	797	vacuolar sorting protein, putative	Lysosome	8.36231	19.4425	240	35.2909	8.07361	7.2038	2.32502	28.7002	4.22023	0.965475	0.861461
Tb11.01.5910	1952	dynein intermediate chain IC70, putative	Cytoskeleton	28.5807	22.5828	240	240	31.2225	26.3642	0.790143	8.39729	8.39729	1.09243	0.922448
Tb11.01.5915	568	small nuclear ribonucleoprotein Sm-G	RNA processing	21.0052	15.2227	240	240	134.096	15.3431	0.724709	11.4257	11.4257	6.38392	0.73044
Tb11.01.5920	651	hypothetical protein, conserved	0	9.56714	11.6391	240	240	12.4617	8.82216	1.21657	25.0859	25.0859	1.30255	0.922131
Tb11.01.5930	4830	hypothetical protein, conserved	0	18.3069	56.5328	240	50.9024	26.2713	50.0688	3.08805	13.1098	2.7805	1.43505	2.73496
Tb11.01.5940	3281	exportin 1	Nucleo-cytoplasmic transport	12.3747	18.1844	42.5386	22.9576	17.5895	34.8976	1.46949	3.43755	1.85521	1.42141	2.82008
Tb11.01.5950	1041	mitochondrial carrier protein, putative	Mitochondrial pathway	9.44551	18.0058	18.1546	17.06	9.27806	9.56052	1.90628	1.92203	1.80615	0.982272	1.01218
Tb11.01.5960	1448	mitochondrial carrier protein, putative	Mitochondrial pathway	9.28198	13.0611	12.471	22.7773	12.7639	10.1778	1.40715	1.34357	2.45393	1.37513	1.09651
Tb11.01.5970	2933	hypothetical protein, conserved	0	17.3582	22.1957	240	40.1861	15.926	75.6712	1.27869	13.8263	2.31511	0.917493	4.35939
Tb11.01.5980	2024	hypothetical protein, conserved	Mitochondrial RNA	12.2641	13.8802	14.6551	13.2018	12.0237	10.4122	1.13177	1.19496	1.07646	0.980397	0.848997
Tb11.01.5990	1000	hypothetical protein, conserved	0	9.82275	15.6455	23.6699	35.031	8.3734	8.90563	1.59278	2.4097	3.56631	0.852449	0.906633
Tb11.01.6000	1058	hypothetical protein, conserved	0	10.3651	10.9768	17.0664	16.8814	10.6337	9.24334	1.05901	1.64653	1.62868	1.02591	0.891776
Tb11.01.6010	1589	hypothetical protein, conserved	0	10.0136	15.5879	22.3836	15.2165	8.54757	9.00452	1.55667	2.23532	1.51958	0.853596	0.89923
Tb11.01.6020	1930	hypothetical protein, conserved	0	13.747	13.8528	13.1369	17.1094	10.9045	9.20592	1.0077	0.955617	1.24459	0.793226	0.669667
Tb11.01.6030	955	proteasome regulatory non-ATP-ase subunit	Ubiquitin & proteasome	8.62784	16.3793	37.2159	133.485	9.55554	10.415	1.89843	4.31347	15.4715	1.10752	1.20714
Tb11.01.6040	2469	hypothetical protein, conserved	#N/A	11.3954	19.1921	41.7003	24.8807	10.9672	53.2452	1.68419	3.65938	2.18339	0.962417	4.67249
Tb11.01.6050	2274	hypothetical protein, conserved	0	10.8398	19.7269	40.8726	25.2117	21.2281	40.9382	1.81986	3.77062	2.32586	1.95836	3.77668
Tb11.01.6060	924	ADP-ribosylation factor GTPase activating protein 1, putative	Vesicular transport	11.0428	15.3321	240	96.8939	11.3793	10.4623	1.38842	21.7336	8.77437	1.03047	0.94743
Tb11.01.6070	2511	hypothetical protein, conserved	0	9.68569	19.9191	25.759	14.6405	12.2028	17.5503	2.05655	2.65949	1.51156	1.25988	1.81199
Tb11.01.6080	1383	ubiquitin carboxyl-terminal hydrolase, putative	Ubiquitin & proteasome	7.8935	14.2639	10.6678	10.2793	8.11618	11.3808	1.80704	1.35146	1.30225	1.02821	1.4418
Tb11.01.6090	738	RNA polymerase subunit, putative	RNA synthesis II	10.9329	8.88417	34.3644	17.7251	10.0292	7.29951	0.812607	3.14321	1.62126	0.91734	0.667663
Tb11.01.6100	2363	hypothetical protein, conserved	0	11.6313	26.742	90.3761	46.7902	10.9634	10.5583	2.29914	7.77007	4.02277	0.942579	0.907747
Tb11.01.6110	498	hypothetical protein	0	9.48854	26.1908	12.1143	17.678	7.42267	9.00952	2.76025	1.27673	1.86309	0.782277	0.949516
Tb11.01.6120	844	polypeptide deformylase, putative	Enzyme	9.01941	12.9709	20.671	20.6531	8.14553	8.2545	1.43811	2.29184	2.28985	0.90311	0.915192
Tb11.01.6130	1749	hypothetical protein, conserved	0	8.71655	14.9106	15.4092	15.0364	11.0995	11.6662	1.71061	1.76781	1.72504	1.27338	1.33839
Tb11.01.6140	1704	hypothetical protein, conserved	0	10.1361	15.6848	240	18.475	10.8885	14.8678	1.54742	23.6778	1.8227	1.07423	1.46682
Tb11.01.6150	2047	hypothetical protein, conserved	0	10.3136	17.0381	18.6611	20.2647	10.8632	9.48526	1.652	1.80936	1.96485	1.05329	0.919684
Tb11.01.6170	4418	cleavage and polyadenylation specificity factor-like protein, putative	RNA processing	11.6742	33.3319	35.1873	16.9322	12.2442	14.8158	2.85518	3.01411	1.4504	1.04883	1.2691
Tb11.01.6180	1337	hypothetical protein, conserved	0	11.3365	14.2877	12.132	13.3561	8.53589	9.58011	1.26033	1.07018	1.17815	0.752959	0.845071
Tb11.01.6190	1986	RNA guanylyltransferase	RNA processing	9.25989	11.0481	46.1225	23.0724	14.9085	31.1884	1.19311	4.9809	2.49165	1.61001	3.36811
Tb11.01.6200	2456	hypothetical protein, conserved	0	17.6778	24.9211	240	50.584	20.1543	15.6987	1.40974	13.5764	2.86145	1.14009	0.888048
Tb11.01.6210	1254	procyclin-associated gene 2-like protein, putative	PAG	14.1687	12.8907	240	240	13.7815	29.93	0.909801	16.9387	16.9387	0.972672	2.1124
Tb11.01.6220	1110	procyclin-associated gene 4 (PAG4) protein, putative	PAG	11.7648	12.9532	240	85.3711	18.3608	12.7762	1.10101	20.3998	7.25647	1.56065	1.08597
Tb11.01.6230	1467	expression site-associated gene 2 (ESAG2) protein, putative	ESAG	56.8946	#N/A	240	240	33.9313	38.4503	#N/A	4.21832	4.21832	0.596388	0.675816
Tb11.01.6240	1368	expression site-associated gene (ESAG) protein, putative ,expression site-associated gene 2 (ESAG2) protein, putative	ESAG	18.3689	#N/A	240	240	77.2099	14.7446	#N/A	13.0656	13.0656	4.20329	0.802694
Tb11.01.6250	1168	expression site-associated gene (ESAG) protein, putative ,expression site-associated gene 11 (ESAG11) protein, putative	ESAG	24.1873	#N/A	240	46.4708	39.6296	15.4864	#N/A	9.92256	1.92129	1.63845	0.640269
Tb11.01.6260	4227	RNA helicase, putative ,DEAD/DEAH box helicase, putative	RNA helicase	38.5309	37.1852	240	240	72.0752	240	0.965077	6.22877	6.22877	1.87058	6.22877
Tb11.01.6270	1854	hypothetical protein, conserved	0	12.6166	18.1616	29.8589	17.0662	12.276	18.9304	1.4395	2.36664	1.35268	0.973004	1.50044
Tb11.01.6280	3351	hypothetical protein, conserved	0	14.5508	17.7207	240	29.1284	20.1047	240	1.21786	16.494	2.00185	1.38169	16.494
Tb11.01.6285	547	hypothetical protein, conserved	0	8.30442	10.1492	16.9288	24.4741	10.0814	10.9102	1.22214	2.03853	2.94712	1.21398	1.31379
Tb11.01.6290	663	hypothetical protein, conserved	0	8.08943	17.0911	17.0326	12.4504	7.97996	9.55364	2.11278	2.10554	1.53909	0.986468	1.181
Tb11.01.6300	8583	phosphatidylinositol 3-related kinase, putative	Signalling	17.3577	37.9137	240	28.1975	32.5748	240	2.18426	13.8267	1.6245	1.87668	13.8267
Tb11.01.6310	1020	hypothetical protein, conserved	0	8.72519	15.0109	240	30.657	10.1696	13.7652	1.72041	27.5066	3.51362	1.16555	1.57764
Tb11.01.6320	2273	hypothetical protein, conserved	0	12.5946	13.7728	18.3848	33.7168	12.4564	13.7777	1.09355	1.45974	2.67709	0.989031	1.09394
Tb11.01.6340	624	hypothetical protein, conserved	0	8.77765	9.36501	9.5977	12.6068	9.44916	8.94411	1.06692	1.09343	1.43624	1.0765	1.01896
Tb11.01.6350	1140	hypothetical protein, conserved	0	8.02897	13.3024	20.9087	11.6491	7.71409	9.01616	1.6568	2.60415	1.45089	0.960782	1.12295
Tb11.01.6360	2072	metalloprotease, putative ,cell division protein FtsH homologue, putative	Protease or peptidase	9.31578	16.6527	26.4699	17.3407	9.91144	13.0373	1.78758	2.8414	1.86143	1.06394	1.39949
Tb11.01.6370	2127	hypothetical protein, conserved	0	9.97558	17.1146	20.8805	20.7375	10.4816	9.60977	1.71565	2.09316	2.07883	1.05073	0.963329
Tb11.01.6380	1197	hypothetical protein, conserved	0	43.8305	52.9485	240	240	48.951	17.6988	1.20803	5.47564	5.47564	1.11683	0.403801
Tb11.01.6390	3021	hypothetical protein, conserved	0	11.0367	18.9116	13.1186	17.2705	11.1099	17.1092	1.71352	1.18864	1.56482	1.00663	1.55021
Tb11.01.6400	855	hypothetical protein, conserved	0	7.84501	11.5468	20.767	24.7094	10.687	7.96716	1.47186	2.64716	3.1497	1.36227	1.01557
Tb11.01.6410	1255	phosphomannose isomerase, putative	Glucose & glycerol	11.0734	10.7701	240	24.6892	11.0873	9.91661	0.972612	21.6735	2.22959	1.00126	0.895533
Tb11.01.6420	2460	DNA repair and recombination helicase protein PIF1, putative	Mitochondrial DNA	19.02	19.313	26.4314	34.5453	13.2051	14.1017	1.01541	1.38966	1.81626	0.694275	0.741414
Tb11.01.6430	1436	hypothetical protein, conserved	0	13.036	11.1014	20.9001	37.7526	11.0824	12.2463	0.851596	1.60325	2.89602	0.850134	0.939423
Tb11.01.6440	942	hypothetical protein, conserved	0	9.58452	14.5285	11.8475	11.3533	6.99306	7.09554	1.51583	1.23611	1.18455	0.72962	0.740312
Tb11.01.6450	2270	hypothetical protein, conserved	0	10.1566	21.5496	22.2306	16.4135	7.9377	12.5114	2.12174	2.18879	1.61605	0.781533	1.23186
Tb11.01.6460	746	hypothetical protein, conserved	0	13.4871	14.7195	26.1934	116.078	15.1413	11.4023	1.09138	1.94211	8.60663	1.12266	0.845422
Tb11.01.6470	1277	chromosomal passenger protein	Chromatin	104.46	50.804	240	240	147.469	19.7031	0.486349	2.29753	2.29753	1.41173	0.188619
Tb11.01.6480	2371	hypothetical protein, conserved	0	13.7871	20.8451	20.8109	15.84	12.7886	13.5881	1.51193	1.50945	1.1489	0.927576	0.985567
Tb11.01.6490	1998	hypothetical protein, conserved	0	9.74698	11.0812	34.355	25.3672	21.493	210.317	1.13689	3.52468	2.60257	2.2051	21.5777
Tb11.01.6500	1039	NAD%2B synthase, putative	Enzyme	10.2121	14.6217	14.0057	13.7132	9.83517	8.77984	1.4318	1.37148	1.34284	0.963088	0.859746
Tb11.01.6510	1722	paraflagellar rod component, putative	Cytoskeleton	49.7985	25.2032	240	240	240	24.2207	0.506103	4.81943	4.81943	4.81943	0.486374
Tb11.01.6520	1947	hypothetical protein, conserved	0	11.2775	15.0928	38.2789	25.4443	20.4449	31.2776	1.33831	3.39426	2.25619	1.81289	2.77344
Tb11.01.6530	1013	coatomer epsilon subunit, putative ,cytosolic coat protein, putative	Vesicular transport	11.4309	15.48	240	240	21.1553	15.7985	1.35423	20.9958	20.9958	1.85071	1.38209
Tb11.01.6540	1416	protein phosphatase 2C, putative	Protein phosphatase	8.738	14.8113	15.1947	15.8508	9.86474	8.71888	1.69505	1.73892	1.814	1.12895	0.997813
Tb11.01.6550	10427	hypothetical protein, conserved	0	22.9366	32.3861	240	36.068	33.3405	240	1.41198	10.4636	1.57251	1.45359	10.4636
Tb11.01.6570	2196	hypothetical protein, conserved	0	20.2472	17.7832	240	61.7032	17.6109	19.6975	0.878305	11.8535	3.0475	0.869797	0.972852
Tb11.01.6580	1778	hypothetical protein, conserved	0	12.3519	15.6818	17.0883	31.1597	11.3055	15.9465	1.26959	1.38346	2.52267	0.915286	1.29102
Tb11.01.6590	635	zinc finger protein 2	RNA binding	121.405	28.0278	240	132.965	162.209	17.8737	0.230862	1.97685	1.09522	1.3361	0.147223
Tb11.01.6600	2115	pumilio/PUF RNA binding protein 7, putative	rRNA-tRNA processing	13.3528	25.2257	42.0394	240	13.6572	88.9149	1.88917	3.14836	17.9738	1.0228	6.6589
Tb11.01.6610	2512	hypothetical protein, conserved	0	12.9259	15.2435	240	27.9341	14.6075	10.5519	1.1793	18.5674	2.1611	1.1301	0.816335
Tb11.01.6620	1662	hypothetical protein, conserved	Mitochondrial translation	10.4594	14.916	13.9307	16.4406	9.03486	10.7329	1.42608	1.33188	1.57185	0.863804	1.02615
Tb11.01.6630	2688	hypothetical protein, conserved	0	11.3722	13.5678	15.0833	19.2348	8.33428	10.1262	1.19307	1.32634	1.69139	0.732865	0.890434
Tb11.01.6640	1361	survival of motor neuron (SMN)-like protein	RNA processing	13.3826	15.9803	47.6228	38.5854	27.3771	9.75551	1.19412	3.55857	2.88326	2.04573	0.728971
Tb11.01.6650	1722	serine/threonine-protein kinase, putative	Protein kinase	13.3908	16.4688	57.4656	41.3514	13.2816	13.2693	1.22986	4.29142	3.08804	0.991843	0.990926
Tb11.01.6660	765	iron superoxide dismutase	Redox pathways	24.9063	18.947	54.877	240	73.7399	18.6465	0.760732	2.20334	9.63612	2.96069	0.748666
Tb11.01.6670	648	small GTPase	Vesicular transport	17.7088	11.64	240	240	32.9289	19.6238	0.6573	13.5526	13.5526	1.85946	1.10814
Tb11.01.6680	1847	chaperonin HSP60, mitochondrial precursor, putative ,heat shock protein 60	Mitochondrial biogenesis	9.61694	10.4907	72.0303	26.463	11.1989	15.8002	1.09086	7.48993	2.75171	1.16449	1.64296
Tb11.01.6690	1442	hypothetical protein, conserved	0	9.98548	18.0316	14.7324	43.3881	11.3697	13.107	1.80579	1.47539	4.34512	1.13862	1.31261
Tb11.01.6700	1132	hypothetical protein, conserved	0	15.6852	13.4702	29.0508	31.0963	14.0659	35.2553	0.858784	1.85212	1.98253	0.896768	2.24769
Tb11.01.6710	3231	hypothetical protein, conserved	0	13.0606	19.942	105.665	31.8611	18.5718	36.9948	1.52688	8.09041	2.43949	1.42197	2.83255
Tb11.01.6715	431	hypothetical protein, conserved	0	29.9738	22.1497	240	240	127.386	56.5406	0.738969	8.00698	8.00698	4.2499	1.88633
Tb11.01.6720	1961	hypothetical protein, conserved	0	11.9593	14.1737	22.4688	56.3243	12.4911	11.6305	1.18516	1.87877	4.70964	1.04447	0.972501
Tb11.01.6740	3803	Tb5.20	Cytoskeleton	50.6331	38.4072	240	240	240	240	0.75854	4.73999	4.73999	4.73999	4.73999
Tb11.01.6760	1788	hypothetical protein, conserved	0	13.0352	18.7743	22.2639	74.8883	11.5252	27.6937	1.44028	1.70798	5.74507	0.884154	2.12452
Tb11.01.6770	2263	hypothetical protein, conserved	0	14.2696	17.9012	240	31.9039	13.7713	105.103	1.2545	16.819	2.23579	0.965077	7.36548
Tb11.01.6780	1635	chaperone protein DNAj, putative ,heat shock protein-like protein, putative	Chaperone	14.7331	13.7658	91.6066	77.5748	14.9013	12.5192	0.934344	6.21774	5.26534	1.01142	0.84973
Tb11.01.6790	1827	hypothetical protein, conserved	0	23.8223	21.7169	240	119.738	18.8999	26.8014	0.911623	10.0746	5.02633	0.793371	1.12506
Tb11.01.6800	1198	1-acyl-sn-glycerol-3-phosphate acyltransferase, putative	Lipids & fatty acids	20.9201	15.9549	240	240	28.6731	8.78312	0.762661	11.4722	11.4722	1.3706	0.419842
Tb11.01.6820	1170	hypothetical protein, conserved	0	26.553	29.721	240	35.0883	27.4677	240	1.11931	9.03852	1.32144	1.03445	9.03852
Tb11.01.6830	843	hypothetical protein, conserved	0	9.47334	11.8578	19.6371	10.6486	9.11618	11.7933	1.2517	2.07288	1.12406	0.962299	1.24489
Tb11.01.6835	396	hypothetical protein, conserved	0	11.6394	15.9154	35.3501	185.427	16.8966	9.89271	1.36738	3.03711	15.931	1.45167	0.849935
Tb11.01.6840	2065	hypothetical protein, conserved	0	11.015	15.921	42.5426	18.5314	11.7316	14.3311	1.44539	3.86223	1.68237	1.06506	1.30105
Tb11.01.6860	1076	hypothetical protein, conserved	0	11.9097	18.4263	54.7247	240	14.0124	12.9243	1.54716	4.59495	20.1516	1.17655	1.08519
Tb11.01.6870	937	hypothetical protein, conserved	0	13.2674	14.2418	31.6996	65.5264	15.1922	14.6533	1.07345	2.38929	4.93892	1.14508	1.10446
Tb11.01.6880	1124	cytosolic coat protein, putative	Vesicular transport	21.639	16.4421	240	240	49.0015	11.0698	0.759834	11.0911	11.0911	2.2645	0.511565
Tb11.01.6890	950	small GTPase, putative ,ras-related protein rab-2a, putative	Vesicular transport	23.2127	13.2784	240	87.0613	44.6321	15.9082	0.57203	10.3391	3.75058	1.92274	0.685322
Tb11.01.6900	2631	hypothetical protein, conserved	0	10.6742	24.2502	21.9846	23.3819	11.0985	11.6942	2.27186	2.0596	2.19051	1.03976	1.09556
Tb11.01.6910	576	hypothetical protein	0	7.63836	13.0918	11.4463	6.93317	7.38827	7.29792	1.71395	1.49853	0.907678	0.967259	0.95543
Tb11.01.6920	861	hypothetical protein, conserved	0	11.1455	19.6802	10.2775	16.4294	11.0049	9.90846	1.76576	0.922123	1.47409	0.987392	0.889014
Tb11.01.6930	1108	tRNA-sepcific adenosine deaminase	rRNA-tRNA processing	11.1475	40.4767	12.1495	23.9655	12.4524	13.1139	3.63101	1.08988	2.14985	1.11706	1.17639
Tb11.01.6940	825	hypothetical protein, conserved	Translation	10.2946	15.9122	15.5929	16.4014	12.2284	9.46911	1.54568	1.51467	1.5932	1.18785	0.919812
Tb11.01.6950	1081	hypothetical protein, conserved	0	12.0692	18.6434	13.3318	31.5016	15.5216	12.922	1.54471	1.10461	2.61009	1.28605	1.07066
Tb11.01.6960	2508	hypothetical protein, conserved	0	12.2833	16.9884	43.8025	21.1735	10.3141	14.3504	1.38304	3.56602	1.72376	0.839687	1.16828
Tb11.01.6980	3483	phosphatidylinositol 3-kinase catalytic subunit, putative	Signalling	21.6458	26.8565	240	29.2309	21.3038	151.168	1.24073	11.0876	1.35042	0.984202	6.9837
Tb11.01.6990	1878	hypothetical protein, conserved	0	11.6934	22.1766	17.4227	16.8534	9.37211	11.08	1.8965	1.48996	1.44127	0.801485	0.947539
Tb11.01.7000	904	RNA-binding protein, putative	RNA binding	9.43383	13.5165	9.04755	9.05072	8.19798	8.54507	1.43277	0.959054	0.95939	0.868998	0.90579
Tb11.01.7005	726	hypothetical protein, conserved	0	9.4341	12.5109	12.2215	20.5539	8.50513	8.49478	1.32614	1.29546	2.17868	0.90153	0.900434
Tb11.01.7010	5053	hypothetical protein, conserved	Nucleo-cytoplasmic trasnport	19.7016	17.3193	240	63.6299	24.8785	29.9224	0.87908	12.1817	3.22968	1.26276	1.51878
Tb11.01.7030	492	hypothetical protein	0	34.9054	240	53.9573	240	240	#N/A	6.87573	1.54582	6.87573	6.87573	#N/A
Tb11.01.7040	1187	hypothetical protein	0	16.6992	16.0777	240	113.17	64.8074	12.1017	0.962785	14.372	6.77696	3.88088	0.724688
Tb11.01.7050	4193	hypothetical protein, conserved	0	13.8475	24.3915	240	63.141	20.1909	34.5501	1.76144	17.3317	4.55975	1.45809	2.49505
Tb11.01.7060	1153	hypothetical protein, conserved	0	15.1517	16.455	16.3982	32.4631	10.8379	12.2002	1.08602	1.08227	2.14254	0.715294	0.805203
Tb11.01.7070	753	hypothetical protein, conserved	0	22.146	18.0615	46.9284	240	63.4308	37.3262	0.815567	2.11905	10.8372	2.86421	1.68546
Tb11.01.7080	3006	U5 small nuclear ribonucleoprotein component, putative ,U5 snrnp-specific protein, putative	RNA processing	11.8	24.3929	45.4405	20.4983	15.019	19.3175	2.06719	3.85088	1.73714	1.2728	1.63708
Tb11.01.7090	701	hypothetical protein, conserved	Mitochondrial pathway	10.6636	19.4186	14.681	42.9122	41.6714	16.7431	1.82102	1.37673	4.02417	3.90781	1.57012
Tb11.01.7095	7490	hypothetical protein	0	15.8464	22.1215	240	28.1638	31.6373	27.2065	1.396	15.1454	1.7773	1.9965	1.71689
Tb11.01.7100	2279	ATP-dependent DEAD/H RNA helicase, putative	RNA helicase	13.3066	18.6655	68.4874	45.9359	13.9091	11.0501	1.40273	5.14689	3.45212	1.04528	0.830421
Tb11.01.7110	2356	methionyl-tRNA formyltransferase	Mitochondrial pathway	12.9135	27.4841	15.007	14.8509	10.2591	9.26912	2.12832	1.16211	1.15003	0.794449	0.717785
Tb11.01.7120	673	hypothetical protein, conserved	chaperone	30.2902	21.3133	39.8376	240	240	41.1605	0.703638	1.3152	7.92336	7.92336	1.35887
Tb11.01.7130	2298	Tb-291 membrane associated protein, putative ,membrane associated protein, putative	Membrane	18.0208	18.1933	240	41.8071	54.0339	23.9	1.00958	13.318	2.31994	2.99843	1.32625
Tb11.01.7140	940	hypothetical protein, conserved	Mitochondrial translation	9.92768	14.4505	14.7506	12.8068	8.71215	7.75288	1.45558	1.48581	1.29001	0.877562	0.780936
Tb11.01.7150	864	hypothetical protein, conserved	0	12.4372	15.8178	16.9491	240	12.4816	11.0827	1.27181	1.36278	19.297	1.00357	0.891094
Tb11.01.7160	2310	hypothetical protein, conserved	0	10.4691	23.9856	25.5964	23.7894	15.2994	13.1005	2.29109	2.44496	2.27235	1.46139	1.25135
Tb11.01.7170	1404	C-14 sterol reductase, putative	Sterols	10.6776	17.4967	46.8961	21.5316	10.4137	15.6037	1.63863	4.392	2.01651	0.97528	1.46134
Tb11.01.7180	1926	hypothetical protein, conserved	0	13.3005	14.3894	27.8845	23.7492	19.6544	9.64934	1.08187	2.0965	1.78559	1.47772	0.725486
Tb11.01.7190	993	NADH-cytochrome b5 reductase, putative	Mitochondrial electron transport	12.5138	13.6896	240	217.657	18.116	#N/A	1.09395	19.1788	17.3933	1.44768	#N/A
Tb11.01.7200	1756	Nucleoporin	Nucleo-cytoplasmic transport	10.8449	25.9517	25.4375	14.3732	10.1762	9.67971	2.39299	2.34557	1.32534	0.938337	0.892558
Tb11.01.7210	1902	hypothetical protein, conserved (pseudogene)	pseudogene	10.3999	#N/A	20.8477	18.2269	10.2432	11.4505	#N/A	2.0046	1.7526	0.984936	1.10102
Tb11.01.7220	1249	hypothetical protein, conserved	0	11.5654	10.3678	12.2363	13.2724	10.0645	9.87637	0.896454	1.05801	1.1476	0.870226	0.85396
Tb11.01.7230	926	hypothetical protein, conserved	0	13.9662	27.9325	22.5039	26.8807	12.6586	9.05376	2.00001	1.61132	1.9247	0.906374	0.648263
Tb11.01.7240	2442	histone deacetylase 2 ,histone deacetylase-like protein HDO2	Chromatin	12.4086	12.2898	62.959	40.5109	20.3612	16.432	0.990422	5.0738	3.26474	1.64089	1.32424
Tb11.01.7250	3165	hypothetical protein, conserved	0	13.0268	21.065	48.5311	20.94	14.8028	12.161	1.61705	3.72548	1.60745	1.13634	0.933539
Tb11.01.7260	1991	hypothetical protein, conserved	0	12.5099	22.3101	15.0427	20.3119	11.4044	12.9278	1.78339	1.20246	1.62366	0.911632	1.0334
Tb11.01.7280	1196	hypothetical protein, conserved	0	9.7917	13.6007	11.9953	20.1617	10.6309	10.8049	1.38901	1.22504	2.05906	1.0857	1.10348
Tb11.01.7290	1549	NUDIX hydrolase, conserved	Mitochondrial RNA	11.4533	16.089	28.0217	17.4024	12.5947	15.4582	1.40475	2.44661	1.51943	1.09966	1.34968
Tb11.01.7300	1111	poly(A) polymerase, putative	Mitochondrial RNA	8.96089	13.4498	11.4211	13.5681	8.01237	10.7998	1.50094	1.27455	1.51414	0.894148	1.20522
Tb11.01.7310	1706	hypothetical protein, conserved	0	15.5074	35.0249	19.8248	25.7211	15.3294	13.7697	2.25859	1.2784	1.65863	0.98852	0.887944
Tb11.01.7320	1164	hypothetical protein	0	9.50603	12.8946	32.4761	66.4101	10.8588	9.30478	1.35646	3.41636	6.9861	1.1423	0.978829
Tb11.01.7325	453	hypothetical protein, conserved	0	9.44066	21.002	240	240	15.6556	12.2648	2.22464	25.422	25.422	1.65832	1.29915
Tb11.01.7330	3086	U5 snRNP-associated 102 kDa protein, putative	RNA processing	11.2883	20.545	21.0531	16.9153	10.2159	12.0726	1.82002	1.86504	1.49848	0.905002	1.06948
Tb11.01.7350	1666	hypothetical protein, conserved	0	12.5473	21.9614	12.8173	15.7698	9.68041	11.7661	1.75029	1.02152	1.25683	0.771512	0.937741
Tb11.01.7360	522	hypothetical protein	0	11.5895	21.4929	#N/A	#N/A	16.0863	#N/A	1.85452	#N/A	#N/A	1.38801	#N/A
Tb11.01.7370	2378	hypothetical protein, conserved	0	15.1705	29.5008	240	36.184	11.7714	39.9821	1.94461	15.8201	2.38515	0.775936	2.63551
Tb11.01.7380	1629	hypothetical protein, conserved	0	11.9884	15.712	56.9011	17.1608	10.0627	14.5391	1.3106	4.74634	1.43145	0.839367	1.21276
Tb11.01.7390	4317	AMP deaminase, putative	Nucleotides-Purines	15.3898	22.1288	240	21.4282	15.7435	18.8398	1.43789	15.5948	1.39236	1.02298	1.22417
Tb11.01.7400	1354	GPI transamidase	GPI anchors & metabolism	11.0733	14.8247	31.1703	240	24.7733	19.1286	1.33878	2.81492	21.6738	2.23722	1.72746
Tb11.01.7410	1311	hypothetical protein, conserved	0	11.2462	18.9642	10.1438	15.4109	10.3669	9.98804	1.68628	0.901974	1.37032	0.921817	0.888127
Tb11.01.7430	439	hypothetical protein, conserved	0	21.4584	14.7236	35.5421	48.742	11.2564	13.4013	0.686146	1.65632	2.27146	0.524566	0.624525
Tb11.01.7440	1451	hypothetical protein, conserved	0	11.8895	18.4934	42.6897	28.9397	13.0572	9.98655	1.55544	3.59054	2.43406	1.09821	0.839946
Tb11.01.7450	2430	hypothetical protein, conserved	0	17.6666	21.8563	240	109.186	23.3174	28.2659	1.23715	13.5849	6.18035	1.31986	1.59996
Tb11.01.7460	1089	NADH dehydrogenase subunit NI2M, putative	Mitochondrial electron transport	11.1959	15.4048	23.4299	14.3723	8.87354	8.98331	1.37593	2.09272	1.28371	0.792571	0.802376
Tb11.01.7480	1046	superoxide dismutase, putative	Mitochondrial pathway	9.1732	13.5721	27.3488	13.0611	8.01378	7.88378	1.47954	2.98138	1.42384	0.873608	0.859437
Tb11.01.7490	6095	hypothetical protein, conserved	0	15.4835	38.6313	120.115	43.8623	20.65	18.7078	2.495	7.75759	2.83284	1.33368	1.20824
Tb11.01.7500	1412	amino acid transporter, putative	Amino acid transporter	28.7523	25.4064	240	240	25.6922	19.5563	0.883631	8.34716	8.34716	0.893571	0.680166
Tb11.01.7510	3856	hypothetical protein, conserved	Mitochondrial RNA	11.4759	15.6381	26.9449	21.9784	12.7472	13.1177	1.36268	2.34795	1.91517	1.11078	1.14306
Tb11.01.7520	1412	amino acid transporter, putative	Amino acid transporter	27.2482	24.2024	240	240	25.4875	18.7594	0.888221	8.80793	8.80793	0.935382	0.688465
Tb11.01.7530	1155	hypothetical protein, conserved	0	40.6522	16.332	240	240	27.8594	36.4946	0.401749	5.90374	5.90374	0.68531	0.897728
Tb11.01.7535	415	60S ribosomal protein L27, putative	Ribosome	234.199	48.8523	56.4235	240	240	240	0.208593	0.240922	1.02477	1.02477	1.02477
Tb11.01.7540	3111	hypothetical protein, conserved	0	27.0518	42.5861	15.4688	17.0787	13.6067	22.1061	1.57424	0.571821	0.631331	0.502985	0.817174
Tb11.01.7545	415	60S ribosomal protein L27, putative	Ribosome	233.333	48.6419	56.8533	240	240	240	0.208466	0.243657	1.02857	1.02857	1.02857
Tb11.01.7550	782	iron superoxide dismutase	Redox pathways	70.7688	28.7653	240	240	60.5131	14.6983	0.406469	3.39132	3.39132	0.855082	0.207694
Tb11.01.7560	494	glutathione peroxidase, putative	Redox pathways	23.0938	12.8165	28.8567	172.894	26.0332	9.54344	0.554978	1.24955	7.48659	1.12728	0.413248
Tb11.01.7570	544	hypothetical protein, conserved	0	12.3315	11.7019	54.4292	165.759	12.3294	9.93572	0.948946	4.41384	13.4419	0.99983	0.805721
Tb11.01.7580	3009	hypothetical protein, conserved	0	11.6411	33.9963	14.2099	20.3089	12.4484	14.0793	2.92037	1.22067	1.74459	1.06935	1.20945
Tb11.01.7590	1659	amino acid transporter, putative	Amino acid transporter	38.8422	34.8646	240	73.2728	31.0139	92.8731	0.897596	6.17885	1.88642	0.798458	2.39104
Tb11.01.7600	2545	amino acid transporter, putative	Amino acid transporter	27.6137	21.5212	240	33.0441	18.958	15.6957	0.779366	8.69134	1.19665	0.686542	0.568403
Tb11.01.7610	3890	hypothetical protein, conserved	0	10.1879	28.5675	59.4654	20.824	13.9965	17.0248	2.80407	5.83689	2.044	1.37385	1.67109
Tb11.01.7620	1605	hypothetical protein, conserved	0	14.2966	17.1846	20.1806	25.438	18.9129	12.9671	1.20201	1.41156	1.7793	1.32289	0.907005
Tb11.01.7630	3558	nucleoporin Nup109	Nucleo-cytoplasmic transport	10.3216	35.1348	135.452	16.65	11.8012	14.411	3.404	13.1231	1.61312	1.14335	1.3962
Tb11.01.7650	1101	exonuclease, putative	RNA degradation	8.15863	15.763	9.31617	16.2676	8.60199	9.442	1.93207	1.14188	1.99391	1.05434	1.1573
Tb11.01.7670	3849	hypothetical protein, conserved	0	16.2524	25.4994	240	48.5188	19.6433	29.0019	1.56896	14.767	2.98533	1.20864	1.78447
Tb11.01.7680	1348	RNA-binding protein, putative	RNA binding	8.19012	12.7799	10.4154	9.08043	7.86005	8.59149	1.56041	1.2717	1.10871	0.959699	1.04901
Tb11.01.7690	1389	proteasome regulatory non-ATP-ase subunit 7	Ubiquitin & proteasome	11.5417	15.2418	240	45.8295	8.73809	6.84408	1.32059	20.7942	3.97078	0.75709	0.592989
Tb11.01.7700	1265	hypothetical protein, conserved	0	17.4771	11.4757	24.9269	13.2657	7.82795	13.8604	0.656611	1.42626	0.759036	0.447898	0.793058
Tb11.01.7710	1872	hypothetical protein, conserved	chaperone	13.1243	14.2494	18.8691	17.2267	10.9473	13.645	1.08573	1.43772	1.31258	0.834124	1.03967
Tb11.01.7720	1593	zinc finger protein, putative ,predicted zinc finger protein	Zinc finger	12.6305	31.8967	15.2693	13.8319	9.43096	7.91858	2.52538	1.20892	1.09512	0.746684	0.626943
Tb11.01.7730	999	hypothetical protein, conserved	RNA synthesis II	11.3654	46.2629	9.82412	15.0609	12.8858	11.0938	4.0705	0.864389	1.32515	1.13378	0.976106
Tb11.01.7740	1212	hypothetical protein, conserved	0	12.2295	17.7055	66.5981	69.2459	17.8133	13.0743	1.44777	5.4457	5.66222	1.45659	1.06909
Tb11.01.7750	1959	dynein docking complex 2 (ODA1) protein, putative	Cytoskeleton	16.0444	14.4012	125.917	22.6553	21.3598	16.9248	0.897586	7.84802	1.41204	1.33129	1.05487
Tb11.01.7760	3722	ubiquitin carboxyl-terminal hydrolase, putative	Ubiquitin & proteasome	17.2546	20.1503	240	32.9437	19.7542	39.5917	1.16782	13.9093	1.90927	1.14487	2.29456
Tb11.01.7770	3786	FG-GAP repeat protein, putative ,intergrin alpha chain protein, putative	Cytoskeleton	11.6724	23.0142	26.5635	58.4745	19.3094	240	1.97168	2.27576	5.00966	1.65428	20.5614
Tb11.01.7790	1978	hypothetical protein, conserved	0	13.7408	15.2883	29.8645	33.2261	15.8101	33.6659	1.11262	2.17341	2.41806	1.15059	2.45006
Tb11.01.7800	510	nucleoside diphosphate kinase	Nucleotides	135.317	54.7771	240	240	240	240	0.404806	1.77361	1.77361	1.77361	1.77361
Tb11.01.7810	2490	minichromosome maintenance (MCM) complex subunit, putative	DNA synthesis, modification, repair	16.5263	14.5136	240	34.0038	17.7761	31.3804	0.878212	14.5223	2.05756	1.07562	1.89881
Tb11.01.7825	477	tubulin binding cofactor A, putative	Cytoskeleton	25.7355	16.7516	240	240	64.125	23.077	0.650913	9.32564	9.32564	2.49169	0.896698
Tb11.01.7830	594	ATP binding protein-like protein	0	26.2859	12.8994	240	240	48.7254	39.2373	0.490736	9.13038	9.13038	1.85367	1.49271
Tb11.01.7840	603	hypothetical protein, conserved	0	20.3012	34.2854	24.7379	127.484	18.3585	24.7185	1.68883	1.21855	6.27961	0.904306	1.21759
Tb11.01.7880	655	microtubule-associated protein ,corset-associated protein 17	Cytoskeleton	37.0743	21.6121	240	165.267	20.9061	11.3116	0.582941	6.47349	4.45771	0.563898	0.305106
Tb11.01.7890	2230	cyclic nucleotide-binding protein, putative	Signalling	15.0245	14.91	240	26.0336	8.0823	11.7761	0.992376	15.9739	1.73274	0.53794	0.783793
Tb11.01.7900	637	hypothetical protein, conserved	Mitochondrial electron transport	9.8064	10.709	17.791	15.5847	10.7316	14.0432	1.09204	1.81422	1.58923	1.09434	1.43205
Tb11.01.7910	2997	hypothetical protein, conserved	0	10.6709	18.3707	20.6241	14.5488	10.7805	17.681	1.72157	1.93274	1.36341	1.01027	1.65693
Tb11.01.7920	3411	hypothetical protein, conserved	0	29.7819	31.4717	18.7293	16.1087	10.6647	36.8419	1.05674	0.62888	0.540889	0.358093	1.23706
Tb11.01.7930	1821	hypothetical protein, conserved	0	13.2774	17.7674	16.7497	17.8476	11.8381	12.9672	1.33818	1.26153	1.34421	0.891598	0.97664
Tb11.01.7940	13282	hypothetical protein, conserved	0	58.0702	55.076	59.6028	240	240	240	0.94844	1.02639	4.13293	4.13293	4.13293
Tb11.01.7950	2565	DNA repair helicase and transcription factor protein, putative ,DNA repair helicase, putative ,transcription factor II H complex, XPB subunit, putative	DNA synthesis, modification, repair	10.6845	19.6493	18.6178	14.4946	10.6797	11.6828	1.83905	1.7425	1.3566	0.999553	1.09344
Tb11.01.7960	805	60S ribosomal protein L2, putative ,60S ribosomal protein L8, putative	Ribosome	152.418	49.9477	54.3324	240	240	240	0.327702	0.35647	1.57462	1.57462	1.57462
Tb11.01.7970	1047	AUT2/APG4/ATG4 cysteine peptidase, putative	Lysosome	9.74873	16.2407	10.1838	14.8487	9.12418	8.89899	1.66593	1.04463	1.52314	0.935935	0.912835
Tb11.01.7980	1272	hypothetical protein, conserved	0	9.85731	19.5179	13.7147	24.7131	10.9992	9.75797	1.98005	1.39132	2.50709	1.11585	0.989922
Tb11.01.7990	3501	myosin, putative ,myosin heavy chain, putative	Cytoskeleton_Actin	15.9851	17.554	240	158.258	23.235	36.0161	1.09815	15.014	9.90036	1.45354	2.25311
Tb11.01.8000	736	hypothetical protein, conserved	0	8.07832	18.6869	13.087	14.9434	8.52144	6.89569	2.31321	1.62002	1.84981	1.05485	0.853605
Tb11.01.8010	2856	hypothetical protein, conserved	0	11.4523	29.04	48.7017	17.5618	11.34	12.2827	2.53573	4.25257	1.53347	0.990191	1.07251
Tb11.01.8030	3537	hypothetical protein, conserved	0	14.1794	20.3497	240	25.4423	14.9176	15.4515	1.43517	16.926	1.79432	1.05207	1.08972
Tb11.01.8040	638	hypothetical protein, conserved	0	20.3485	14.229	240	63.2918	20.0291	20.4093	0.699264	11.7945	3.11039	0.984303	1.00299
Tb11.01.8050	1138	hypothetical protein, conserved	0	20.8985	22.2004	240	36.8966	33.4734	26.8385	1.0623	11.4841	1.76551	1.60171	1.28423
Tb11.01.8060	1958	hypothetical protein, conserved	0	10.1844	18.735	12.9446	15.1599	9.97356	12.6133	1.83958	1.27102	1.48855	0.9793	1.23849
Tb11.01.8070	1400	hypothetical protein, conserved	0	11.2123	15.1836	25.6072	24.0916	19.8316	12.2181	1.3542	2.28385	2.14868	1.76874	1.08971
Tb11.01.8085	522	cyclin dependent kinases regulatory subunit, putative	Cell cycle	23.8394	17.8057	240	240	32.4135	16.2883	0.746899	10.0674	10.0674	1.35966	0.683251
Tb11.01.8090	1011	kinetoplast DNA-associated protein, putative	Mitochondrial DNA	47.9449	32.5543	240	240	240	23.087	0.678994	5.00575	5.00575	5.00575	0.481533
Tb11.01.8100	1561	enolase, putative	Glucose & glycerol	7.75149	15.0527	11.1803	10.9708	8.76089	8.38779	1.94191	1.44235	1.41532	1.13022	1.08209
Tb11.01.8110	894	hypothetical protein, conserved	0	12.7501	20.4915	29.0175	18.0458	10.6465	13.1637	1.60716	2.27586	1.41535	0.83501	1.03244
Tb11.01.8120	488	18 kDa ER-associated protein	Vesicular transport	34.1675	25.2536	24.4883	240	240	84.4063	0.739112	0.716713	7.02422	7.02422	2.47037
Tb11.01.8130	717	hypothetical protein, conserved	0	11.2255	11.8252	16.8865	12.3106	8.45796	7.80708	1.05342	1.5043	1.09667	0.753463	0.69548
Tb11.01.8140	556	hypothetical protein, conserved	0	9.15491	12.4262	45.7916	35.8115	9.12005	12.55	1.35733	5.00187	3.91172	0.996192	1.37085
Tb11.01.8150	2373	hypothetical protein, conserved	0	12.9401	14.201	17.5463	15.0047	12.6832	16.784	1.09744	1.35596	1.15955	0.980148	1.29705
Tb11.01.8190	3562	hypothetical protein, conserved	0	17.7604	22.0982	240	75.8892	21.915	18.408	1.24424	13.5132	4.27294	1.23392	1.03647
Tb11.01.8200	1275	enoyl-CoA hydratase/isomerase family protein, putative	Lipids & fatty acids	12.6507	23.6633	45.4685	240	15.8354	12.4764	1.87052	3.59416	18.9714	1.25175	0.986227
Tb11.01.8210	1242	hypothetical protein, conserved	0	9.51575	12.9855	21.0691	14.1888	10.2408	10.276	1.36464	2.21413	1.49109	1.07619	1.0799
Tb11.01.8220	1970	hypothetical protein, conserved	0	9.6146	13.4882	22.409	16.0165	14.0089	19.7248	1.40289	2.33072	1.66585	1.45705	2.05155
Tb11.01.8225	687	hypothetical protein, conserved	0	24.8847	17.8518	240	240	28.7567	14.0602	0.717379	9.64449	9.64449	1.1556	0.565016
Tb11.01.8226	404	hypothetical protein, conserved	0	10.4711	15.3515	11.1857	17.9037	10.9103	8.25684	1.46608	1.06824	1.70981	1.04194	0.788534
Tb11.01.8230	3207	hypothetical protein, conserved	0	12.1928	38.9303	56.2617	22.402	15.0262	13.7682	3.19289	4.61433	1.83731	1.23238	1.1292
Tb11.01.8240	644	hypothetical protein, conserved	0	19.695	20.0561	240	240	38.357	11.4888	1.01834	12.1859	12.1859	1.94755	0.583339
Tb11.01.8270	1918	hypothetical protein, conserved ,zinc finger protein family member, putative	RNA binding	24.3622	33.7942	240	102.813	16.6173	66.3642	1.38716	9.85132	4.22019	0.682091	2.72406
Tb11.01.8280	1586	CMP-sialic acid transporter, putative	Glycan synthesis & metabolism	13.1909	16.2284	141.098	43.9596	17.6357	10.601	1.23028	10.6967	3.33258	1.33697	0.803663
Tb11.01.8290	2432	ATP-dependent DEAD/H RNA helicase, putative	RNA helicase	13.6536	24.8878	24.4803	39.1447	11.6383	9.40902	1.8228	1.79295	2.86699	0.852397	0.689124
Tb11.01.8300	1776	hypothetical protein, conserved	0	10.0451	24.2637	17.6146	11.1668	8.75777	8.15918	2.41548	1.75355	1.11167	0.871846	0.812256
Tb11.01.8310	1538	RNA-binding protein, putative	RNA binding	11.2323	16.9495	22.4734	15.1988	9.29177	9.58795	1.50899	2.00077	1.35313	0.827234	0.853603
Tb11.01.8320	942	exosome-associated protein 2	RNA degradation	8.79908	16.2456	9.69006	9.6147	7.28388	6.8691	1.84629	1.10126	1.09269	0.8278	0.780661
Tb11.01.8330	3629	hypothetical protein, conserved	0	10.814	15.0479	61.0871	22.7555	12.1581	9.53264	1.39152	5.64889	2.10426	1.1243	0.881509
Tb11.01.8340	1834	hypothetical protein, conserved	0	11.7736	13.6851	15.6315	22.1629	10.9263	12.241	1.16235	1.32767	1.88242	0.928033	1.03969
Tb11.01.8350	2383	hypothetical protein, conserved	0	15.4262	17.4442	21.1635	25.8168	19.5769	9.94903	1.13082	1.37192	1.67357	1.26906	0.644942
Tb11.01.8370	2328	hypothetical protein, conserved	0	13.0041	17.616	33.1468	19.0765	12.8546	24.8051	1.35465	2.54895	1.46696	0.988503	1.90748
Tb11.01.8380	2051	hypothetical protein, conserved	0	14.2645	16.5269	18.7769	19.7622	12.4827	11.7771	1.1586	1.31633	1.38541	0.87509	0.82562
Tb11.01.8390	7662	hypothetical protein, conserved	0	19.2069	28.7066	240	33.806	15.8584	21.131	1.4946	12.4955	1.76009	0.82566	1.10018
Tb11.01.8400	1982	hypothetical protein, conserved	0	10.1589	15.6532	49.8951	23.5352	10.704	13.1779	1.54084	4.91149	2.31672	1.05366	1.29718
Tb11.01.8410	2051	hypothetical protein, conserved	0	12.0442	28.3255	33.4083	17.3437	10.1289	12.9768	2.3518	2.77382	1.44001	0.840984	1.07744
Tb11.01.8420	3611	chloride channel protein, putative	Ion channel or pump	9.97551	26.1135	44.3704	19.9728	10.2196	10.525	2.61776	4.44793	2.00219	1.02447	1.05508
Tb11.01.8430	2946	hypothetical protein, conserved	0	9.44497	28.6592	17.9052	18.8859	10.74	9.63219	3.03433	1.89574	1.99957	1.13711	1.01982
Tb11.01.8440	407	hypothetical protein, conserved	0	11.2722	13.9173	21.0465	29.7105	9.73956	13.9237	1.23466	1.86712	2.63574	0.864037	1.23523
Tb11.01.8460	1771	cyclin 6 ,mitotic cyclin (pers. comm. J. Mottram, Univ. of Glasgow)	Cell cycle	27.7754	34.52	240	87.8777	53.0731	#N/A	1.24283	8.64074	3.16387	1.9108	#N/A
Tb11.01.8470	1575	dihydrolipoyl dehydrogenase	citric acid cycle	23.1909	48.4553	240	240	14.3071	14.6361	2.08941	10.3489	10.3489	0.616926	0.631116
Tb11.01.8480	1381	chaperone protein DNAj, putative	Chaperone	13.4926	34.0608	240	240	37.1998	11.3944	2.52442	17.7876	17.7876	2.75706	0.844494
Tb11.01.8500	988	hypothetical protein, conserved	0	13.8763	13.6879	240	81.7959	17.9133	8.15342	0.986428	17.2957	5.89466	1.29093	0.58758
Tb11.01.8510	2300	T-complex protein 1, alpha subunit, putative	Translation	62.8245	47.4464	240	240	38.587	14.4675	0.755222	3.82017	3.82017	0.614204	0.230284
Tb11.01.8520	1065	glucosamine-6-phosphate isomerase, putative	Glucose & glycerol	27.3285	16.413	240	240	13.8458	22.5925	0.600583	8.78204	8.78204	0.506644	0.826702
Tb11.01.8550	1974	mitogen-activated protein kinase	Protein kinase	21.3989	34.1966	240	27.7188	13.2672	240	1.59805	11.2155	1.29534	0.619995	11.2155
Tb11.01.8560	2550	hypothetical protein, conserved	0	11.483	21.0739	30.342	22.523	13.3888	10.9938	1.83522	2.64233	1.96141	1.16596	0.957396
Tb11.01.8570	1994	dynein light intermediate chain D1bLIC, putative	Cytoskeleton	17.7176	17.6026	240	54.7318	18.0585	7.97392	0.993513	13.5459	3.08913	1.01924	0.450057
Tb11.01.8580	2863	hypothetical protein, conserved	0	30.6698	18.4079	240	20.1087	22.4524	80.1237	0.600196	7.82529	0.655653	0.732068	2.61246
Tb11.01.8590	873	Rab-like 5, small G protein	Vesicular transport	20.0026	13.5121	85.2096	240	37.7342	16.6601	0.675517	4.25993	11.9984	1.88646	0.832897
Tb11.01.8600	3424	hypothetical protein, conserved	0	12.6926	27.1187	15.9602	12.728	11.7491	11.4693	2.13658	1.25744	1.00279	0.925664	0.903624
Tb11.01.8610	2663	hypothetical protein, conserved	0	10.7789	28.8695	21.211	13.9585	10.2707	10.9913	2.67834	1.96783	1.29498	0.952857	1.01971
Tb11.01.8620	1779	hypothetical protein, conserved	Mitochondrial RNA	9.63721	17.2544	11.7739	14.3924	9.29728	7.98721	1.7904	1.22172	1.49342	0.964728	0.828788
Tb11.01.8630	719	NADH dehydrogenase subunit NI8M, putative	Mitochondrial electron transport	12.8183	12.4692	62.6371	121.345	24.309	11.3019	0.972765	4.88652	9.46649	1.89642	0.881697
Tb11.01.8640	1887	hypothetical protein, conserved ,leucine-rich repeat protein (LRRP), putative	LRRP	14.017	#N/A	13.9161	9.27255	10.6385	12.1074	#N/A	0.992802	0.661523	0.758977	0.863766
Tb11.01.8650	6510	hypothetical protein, conserved	0	20.1002	34.9693	240	26.8595	17.9631	21.0855	1.73975	11.9402	1.33628	0.893677	1.04902
Tb11.01.8680	3474	hypothetical protein, conserved	0	12.5261	19.4812	37.3348	24.4049	13.8343	12.0437	1.55525	2.98056	1.94832	1.10444	0.961488
Tb11.01.8690	2754	hypothetical protein, conserved	0	12.4373	17.2543	24.8509	27.804	14.7134	20.959	1.3873	1.99809	2.23554	1.183	1.68517
Tb11.01.8700	2211	ABC transporter, putative	Transporter	10.3194	24.3898	16.9364	18.6308	10.5657	13.1948	2.36349	1.64122	1.80542	1.02387	1.27864
Tb11.01.8710	1560	hypothetical protein, conserved	0	11.626	21.3329	20.6573	14.7069	10.9956	12.3181	1.83493	1.77682	1.265	0.945779	1.05953
Tb11.01.8715	485	hypothetical protein, conserved	0	14.3346	17.8782	16.1727	18.5824	13.3783	12.2942	1.24721	1.12823	1.29633	0.933287	0.857662
Tb11.01.8720	3617	hypothetical protein, conserved	0	19.6411	19.973	27.9795	240	42.1849	19.1188	1.0169	1.42454	12.2193	2.14778	0.973407
Tb11.01.8740	954	protein phosphatase 4, putative	Protein phosphatase	13.0765	16.8652	165.93	46.679	17.7053	9.9468	1.28974	12.6892	3.5697	1.35399	0.760664
Tb11.01.8750	1165	chaperone protein DNAj, putative	Chaperone	8.85596	22.485	41.0264	20.5625	8.48505	8.17859	2.53897	4.63264	2.32188	0.958118	0.923513
Tb11.01.8760	2099	hypothetical protein, conserved	0	12.4093	17.4117	17.1286	21.1229	13.2603	11.8432	1.40312	1.38031	1.70218	1.06858	0.954379
Tb11.01.8770	4501	hypothetical protein, conserved ,leucine-rich repeat protein (LRRP), putative	Cell cycle	57.3473	#N/A	240	240	14.5978	21.2941	#N/A	4.18502	4.18502	0.25455	0.371318
Tb11.01.8775	1737	hypothetical protein, conserved	0	13.1551	16.1936	51.171	240	18.4702	14.54	1.23098	3.88983	18.2439	1.40404	1.10528
Tb11.01.8780	2607	hypothetical protein, conserved	0	12.6068	23.4064	35.5422	46.7454	19.6836	240	1.85664	2.81927	3.70794	1.56134	19.0373
Tb11.01.8820	3804	expression site-associated gene (ESAG) protein, putative ,expression site-associated gene 4 (ESAG4) protein, putative ,receptor-type adenylate cyclase, putative	ESAG	14.2992	#N/A	33.5517	48.9696	16.3708	18.0119	#N/A	2.3464	3.42463	1.14487	1.25964
Tb11.02.0010	855	hypothetical protein, conserved	0	44.8138	24.6554	240	240	40.998	17.4633	0.550175	5.3555	5.3555	0.914854	0.389686
Tb11.02.0020	2108	hypothetical protein, conserved	0	8.51731	16.1884	26.6824	17.1597	10.3723	15.6011	1.90064	3.13273	2.01469	1.21779	1.83169
Tb11.02.0030	13433	dynein heavy chain, putative	Cytoskeleton	37.6362	85.657	240	35.3592	39.4152	240	2.27592	6.37685	0.9395	1.04727	6.37685
Tb11.02.0040	1623	hypothetical protein, conserved	0	11.8745	16.4037	79.9203	25.0365	11.0142	15.4686	1.38142	6.73041	2.10842	0.927545	1.30267
Tb11.02.0060	1899	hypothetical protein, conserved	0	12.2295	15.5166	240	34.3821	13.529	7.38328	1.26878	19.6247	2.81141	1.10626	0.603727
Tb11.02.0070	1968	aminopeptidase, putative ,metallo-peptidase, Clan MF, Family M17	Protease or peptidase	21.2346	28.08	240	240	17.2491	27.4841	1.32237	11.3023	11.3023	0.812312	1.29431
Tb11.02.0080	564	hypothetical protein	0	15.5403	31.1036	240	16.728	36.5842	#N/A	2.00147	15.4437	1.07642	2.35414	#N/A
Tb11.02.0090	6007	kinesin, putative ,Unc104-like kinesin, putative	Cytoskeleton	15.8512	38.915	240	34.5576	22.8442	34.6893	2.45501	15.1408	2.18012	1.44116	2.18843
Tb11.02.0100	1720	carboxypeptidase, putative ,metallo-peptidase, Clan MA(E) Family M32	Protease or peptidase	32.383	73.4099	240	240	19.6703	16.0193	2.26693	7.41131	7.41131	0.607427	0.494685
Tb11.02.0110	3940	hypothetical protein, conserved	0	9.8326	20.7789	24.319	27.0857	20.6362	36.411	2.11327	2.4733	2.75469	2.09876	3.70309
Tb11.02.0120	1945	UDP-N-acetylglucosamine pyrophosphorylase, putative	Glycan synthesis & metabolism	9.94658	17.8485	19.4447	17.7916	10.2912	9.58467	1.79444	1.95492	1.78871	1.03464	0.963615
Tb11.02.0130	2640	hypothetical protein, conserved	Mitochondrial RNA	9.66571	15.5114	27.6634	18.2777	10.5375	13.4697	1.60478	2.86201	1.89099	1.09019	1.39355
Tb11.02.0140	902	hypothetical protein, conserved	0	16.9562	13.3677	29.5196	57.0274	34.4194	15.7163	0.788365	1.74094	3.36322	2.0299	0.92688
Tb11.02.0150	1548	recombinase rad51, putative	DNA synthesis, modification, repair	10.9782	18.6359	12.0999	10.2855	8.89105	10.5293	1.69753	1.10217	0.936905	0.809882	0.95911
Tb11.02.0160	1325	hypothetical protein, conserved	0	11.6739	11.1972	12.8501	12.2899	8.4348	9.18147	0.959165	1.10075	1.05277	0.722532	0.786492
Tb11.02.0170	2074	hypothetical protein, conserved	0	16.3633	17.6307	240	25.5867	12.051	12.5338	1.07746	14.667	1.56367	0.736466	0.765974
Tb11.02.0180	1280	hypothetical protein, conserved	0	10.1052	13.4315	22.8227	31.5223	10.2545	14.0665	1.32916	2.2585	3.1194	1.01477	1.392
Tb11.02.0190	3616	hypothetical protein, conserved	0	11.0397	25.1043	31.8772	15.4679	10.0974	13.1146	2.274	2.88751	1.40111	0.914641	1.18795
Tb11.02.0200	2899	hypothetical protein, conserved	0	13.1636	15.0117	28.0745	22.0092	13.138	15.5676	1.14039	2.13274	1.67198	0.998055	1.18263
Tb11.02.0210	1651	hypothetical protein, conserved	0	182.161	35.3973	240	240	121.503	57.4709	0.194319	1.31752	1.31752	0.66701	0.315496
Tb11.02.0220	2164	hypothetical protein, conserved	0	11.0949	15.0632	240	25.5105	13.203	26.4359	1.35767	21.6315	2.2993	1.19001	2.3827
Tb11.02.0230	2094	hypothetical protein, conserved	0	13.4318	18.9878	23.4223	32.6428	18.1435	25.2542	1.41365	1.7438	2.43027	1.35079	1.88018
Tb11.02.0240	1461	ras-like small GTPase, putative	Signalling	10.3556	30.3912	11.1905	19.163	8.87001	12.9702	2.93476	1.08063	1.8505	0.856542	1.25248
Tb11.02.0250	2519	heat shock protein 84, putative	Chaperone	32.7471	31.2935	240	126.332	23.4664	13.7735	0.95561	7.32889	3.85781	0.716594	0.420602
Tb11.02.0260	1509	Golgi reassembly stacking protein (GRASP homologue), putative	Vesicular transport	10.3413	15.9747	21.4458	15.8199	8.79007	12.8746	1.54475	2.0738	1.52978	0.849997	1.24497
Tb11.02.0270	1815	Nucleoporin	Nucleo-cytoplasmic transport	9.68705	20.4632	240	26.6365	12.5257	23.9615	2.11242	24.7753	2.7497	1.29303	2.47356
Tb11.02.0280	2517	hypothetical protein, conserved	0	12.9207	16.7033	48.5837	38.5919	14.7478	10.7575	1.29276	3.76015	2.98683	1.14141	0.832576
Tb11.02.0290	1561	succinyl-coA:3-ketoacid-coenzyme A transferase, mitochondrial precursor, putative	Citric acid cycle	148.837	240	240	240	59.7616	29.6656	1.61251	1.61251	1.61251	0.401524	0.199316
Tb11.02.0300	2298	hypothetical protein, conserved	0	32.6171	20.2079	240	240	24.9194	35.4983	0.61955	7.3581	7.3581	0.763997	1.08833
Tb11.02.0310	2058	cell division cycle 45 (CDC45), putative	Cell cycle	12.3668	15.6178	240	39.2945	12.1376	67.3486	1.26289	19.4069	3.17743	0.981471	5.44594
Tb11.02.0320	1438	hypothetical protein, conserved	0	10.353	12.1065	9.52853	24.7689	10.6436	11.8678	1.16937	0.920364	2.39244	1.02807	1.14631
Tb11.02.0330	1238	UDP-galactose 4-epimerase	Glycan synthesis & metabolism	12.6427	19.9058	240	36.0023	11.6885	15.4627	1.5745	18.9834	2.84769	0.924526	1.22306
Tb11.02.0340	2545	hypothetical protein, conserved	0	11.5125	20.9268	37.535	18.3672	11.3558	17.0549	1.81774	3.26037	1.59542	0.986391	1.48143
Tb11.02.0350	1564	hypothetical protein, conserved	0	13.8319	13.0026	240	26.2737	17.829	116.841	0.94005	17.3513	1.89951	1.28898	8.44724
Tb11.02.0351	1191	hypothetical protein, conserved	0	9.64906	18.1902	12.5238	29.0068	14.0258	8.68187	1.88518	1.29793	3.00618	1.4536	0.899764
Tb11.02.0352	982	hypothetical protein, conserved	0	9.70967	11.1724	240	26.6808	9.89985	11.2423	1.15064	24.7176	2.74786	1.01959	1.15785
Tb11.02.0353	2026	hypothetical protein, conserved	0	11.2192	18.1436	22.4191	17.6532	12.2328	9.4503	1.61719	1.99829	1.57348	1.09035	0.842334
Tb11.02.0354	2323	hypothetical protein, conserved	0	12.7855	18.6132	240	26.6743	13.0738	22.6555	1.45581	18.7713	2.0863	1.02255	1.77197
Tb11.02.0355	1180	hypothetical protein, conserved	0	10.9487	17.0479	9.37272	11.9889	7.42502	10.7227	1.55706	0.856056	1.09501	0.678163	0.97936
Tb11.02.0356	1126	hypothetical protein, conserved	0	10.4417	17.7724	31.2464	24.7683	11.5022	11.4713	1.70206	2.99246	2.37206	1.10156	1.09861
Tb11.02.0357	2625	hypothetical protein, conserved	0	29.5708	45.2853	240	41.0641	25.1014	14.2483	1.53142	8.11613	1.38867	0.84886	0.481839
Tb11.02.0358	3111	hypothetical protein, conserved	0	14.5523	18.5357	53.6681	15.0469	12.2604	13.3428	1.27373	3.68796	1.03399	0.842511	0.916889
Tb11.02.0360	756	hypothetical protein, conserved	0	21.3691	15.2895	240	240	19.5603	16.1131	0.715498	11.2312	11.2312	0.915356	0.754039
Tb11.02.0380	3548	hypothetical protein, conserved	0	20.6787	30.5567	240	26.1777	13.5969	22.721	1.47769	11.6061	1.26592	0.657531	1.09876
Tb11.02.0390	483	hypothetical protein	0	16.9183	33.8809	#N/A	26.4449	15.2953	17.2974	2.00262	#N/A	1.56309	0.904069	1.02241
Tb11.02.0400	3073	kinesin, putative	Cytoskeleton	13.3127	23.5426	240	25.2153	11.277	12.8271	1.76843	18.0279	1.89408	0.847088	0.963522
Tb11.02.0410	2027	hypothetical protein, conserved	0	12.1866	27.167	50.3611	25.3031	13.7304	13.807	2.22926	4.13251	2.07631	1.12669	1.13297
Tb11.02.0420	704	hypothetical protein, conserved	0	9.94058	16.528	6.53947	8.71206	7.55887	7.05711	1.66268	0.657856	0.876413	0.760406	0.709929
Tb11.02.0430	1268	phosphoglycerate mutase, putative	Glucose & glycerol	9.91694	20.7552	15.309	13.2254	12.8069	10.316	2.09291	1.54372	1.33362	1.29141	1.04024
Tb11.02.0440	1364	glycerolphosphate mutase, putative	Glucose & glycerol	9.7927	12.6102	8.45725	11.114	11.361	9.16195	1.28771	0.863628	1.13493	1.16015	0.935589
Tb11.02.0445	547	hypothetical protein, conserved	0	8.93866	29.4704	240	106.243	13.9958	8.82329	3.29696	26.8496	11.8858	1.56576	0.987093
Tb11.02.0450	1226	hypothetical protein, conserved	0	7.87984	18.3512	12.0554	20.4202	8.82573	10.8043	2.32888	1.5299	2.59144	1.12004	1.37113
Tb11.02.0460	2501	Nucleoporin	Nucleo-cytoplasmic transport	9.0997	40.5529	13.366	10.9871	9.55388	11.6084	4.45651	1.46884	1.20741	1.04991	1.27569
Tb11.02.0465	374	hypothetical protein, conserved	0	8.75573	14.8018	13.6158	14.0364	11.8833	10.1619	1.69052	1.55508	1.60311	1.35721	1.1606
Tb11.02.0470	1977	hypothetical protein, conserved	0	10.2891	17.711	12.1063	11.0766	8.94824	10.0989	1.72133	1.17661	1.07654	0.869677	0.981514
Tb11.02.0480	714	hypothetical protein, conserved	0	8.40648	29.7812	9.64177	11.6446	8.51482	10.5315	3.54265	1.14695	1.3852	1.01289	1.25278
Tb11.02.0490	1426	KREPB4	Mitochondrial RNA	9.81406	23.059	12.8166	14.4922	8.52762	11.3961	2.34959	1.30594	1.47668	0.868919	1.1612
Tb11.02.0500	277	60S ribosomal protein L37, putative	Ribosome	207.515	48.7264	37.431	240	240	240	0.23481	0.180378	1.15654	1.15654	1.15654
Tb11.02.0510	1818	hypothetical protein, conserved	0	10.4308	23.6281	9.27076	11.7762	8.97393	8.48376	2.26521	0.888784	1.12898	0.860327	0.813335
Tb11.02.0520	2274	hypothetical protein, conserved	0	9.69689	22.1093	13.0634	13.664	9.90331	11.3706	2.28004	1.34717	1.40911	1.02129	1.1726
Tb11.02.0530	1326	phosphoribosylpyrophosphate synthetase, putative	Pentose phosphate pathway	32.2573	18.4968	28.0674	64.1076	33.1999	26.6825	0.573415	0.870111	1.98738	1.02922	0.827176
Tb11.02.0540	393	hypothetical protein	0	17.4778	16.551	10.0349	37.6078	21.1127	16.5621	0.946972	0.574153	2.15175	1.20797	0.947608
Tb11.02.0550	1107	hypothetical protein	0	9.96238	13.6633	12.7827	28.7742	13.3554	13.5213	1.37149	1.2831	2.88829	1.34059	1.35723
Tb11.02.0560	702	hypothetical protein, conserved	0	16.567	14.1565	109.508	240	29.8164	21.2251	0.854501	6.60997	14.4866	1.79974	1.28117
Tb11.02.0570	1756	hypothetical protein, conserved	0	11.2524	14.9014	15.4192	18.9717	12.4108	10.9443	1.32429	1.37031	1.68602	1.10295	0.972622
Tb11.02.0580	747	vesicular protein trafficking mediator, putative	Vesicular transport	50.4353	21.5703	112.372	240	29.7427	20.3295	0.427682	2.22804	4.75858	0.589721	0.403081
Tb11.02.0590	476	hypothetical protein, conserved	0	9.42002	16.83	14.2425	32.7651	10.9912	9.56448	1.78662	1.51194	3.47824	1.16679	1.01534
Tb11.02.0600	1297	hypothetical protein, conserved	0	10.356	11.6853	14.3461	14.5674	8.80208	7.9711	1.12837	1.3853	1.40667	0.849952	0.769711
Tb11.02.0610	1349	hypothetical protein, conserved	0	11.529	15.9525	13.0177	10.1879	7.65186	7.04599	1.38368	1.12913	0.883672	0.663706	0.611153
Tb11.02.0620	2204	nucleolar GTP-binding protein 1	rRNA-tRNA processing	11.1717	16.8278	44.8694	26.909	14.3745	15.1297	1.50628	4.01633	2.40866	1.28668	1.35428
Tb11.02.0630	2164	ABC transporter, putative ,adrenoleukodystrophy protein homolog	Glycosome biogenesis	10.7444	20.5091	50.1645	30.482	14.7124	12.0027	1.90881	4.66888	2.83701	1.3693	1.11711
Tb11.02.0640	1393	protein kinase, putative ,dual-specificity protein kinase, putative	Protein kinase	12.2028	18.379	240	18.9422	12.4576	15.9565	1.50613	19.6676	1.55228	1.02088	1.30761
Tb11.02.0650	1254	hypothetical protein, conserved	0	15.2327	19.8905	43.4926	16.4528	9.735	12.7578	1.30578	2.85522	1.0801	0.639086	0.837525
Tb11.02.0660	1208	hypothetical protein, conserved	0	10.2307	15.0865	15.2928	19.6234	10.0451	11.1604	1.47463	1.4948	1.9181	0.981856	1.09087
Tb11.02.0670	676	hypothetical protein, conserved	0	9.52576	12.5967	14.2302	16.9295	10.8353	9.24118	1.32239	1.49387	1.77723	1.13748	0.970126
Tb11.02.0680	657	hypothetical protein, conserved	0	10.9943	21.5262	11.8093	39.2519	10.7623	12.5998	1.95795	1.07413	3.57021	0.978904	1.14603
Tb11.02.0690	4953	hypothetical protein, conserved	0	16.5056	34.3833	240	46.965	64.2532	141.135	2.08313	14.5405	2.8454	3.89281	8.55074
Tb11.02.0710	906	hypothetical protein, conserved	0	13.4044	16.7788	240	96.3687	10.3903	16.1008	1.25173	17.9046	7.18933	0.775142	1.20116
Tb11.02.0730	1162	metacaspase ,cysteine peptidase, Clan CD, family C13	Protease or peptidase	84.7513	69.5984	240	240	45.661	32.3826	0.821208	2.83182	2.83182	0.538765	0.38209
Tb11.02.0740	2296	60S ribosomal protein L44	Ribosome	200.04	28.24	240	240	240	240	0.141172	1.19976	1.19976	1.19976	1.19976
Tb11.02.0750	1689	T-complex protein 1, zeta subunit, putative	Translation	75.7007	26.0799	240	240	38.6477	46.4628	0.344513	3.17038	3.17038	0.510533	0.61377
Tb11.02.0760	14046	dynein heavy chain, putative	Cytoskeleton	71.1209	50.9403	240	142.963	30.7224	240	0.716249	3.37453	2.01014	0.431974	3.37453
Tb11.02.0770	5778	mitochondrial DNA polymerase I protein D, putative	Mitochondrial DNA	24.3393	18.4291	240	45.9082	29.9219	22.1814	0.757172	9.86058	1.88617	1.22936	0.91134
Tb11.02.0780	1787	squalene monooxygenase, putative	Sterols	16.603	18.7525	27.0744	55.0615	12.1302	16.5976	1.12946	1.6307	3.31637	0.730607	0.999673
Tb11.02.0790	2387	kinesin, putative ,MCAK-like kinesin, putative	Cytoskeleton	12.041	24.1764	240	23.062	10.8849	106.546	2.00784	19.9319	1.91529	0.903983	8.84856
Tb11.02.0800	4513	hypothetical protein, conserved	Cytoskeleton	16.9716	18.5808	240	30.1746	38.9206	240	1.09482	14.1413	1.77795	2.29328	14.1413
Tb11.02.0810	3828	hypothetical protein, conserved	0	33.3223	51.99	240	32.3321	28.2157	80.1144	1.56022	7.20239	0.970283	0.846751	2.40423
Tb11.02.0815	673	ubiquitin-conjugating enzyme, putative ,ubiquitin-conjugating enzyme-like protein, putative	Ubiquitin & proteasome	173.327	23.0515	240	240	152.986	#N/A	0.132994	1.38466	1.38466	0.882641	#N/A
Tb11.02.0820	1596	ras-like small GTPase, putative	Signalling	9.06077	11.922	20.547	13.1857	8.69223	10.4615	1.31579	2.26769	1.45526	0.959326	1.15459
Tb11.02.0830	3171	hypothetical protein, conserved	0	16.638	26.8111	37.3062	18.6063	15.6493	16.7232	1.61143	2.24222	1.1183	0.940574	1.00512
Tb11.02.0840	760	RNA-binding protein, putative	RNA binding	9.08312	16.8952	23.242	19.6577	8.32952	10.1929	1.86007	2.55881	2.1642	0.917032	1.12218
Tb11.02.0850	4489	phospholipid-transporting ATPase 1-like protein, putative	Lipids & fatty acids	20.616	32.2233	240	40.8221	17.4873	69.7936	1.56302	11.6414	1.98012	0.84824	3.38541
Tb11.02.0860	2910	hypothetical protein, conserved	Cytoskeleton	12.2802	25.0325	240	20.0034	17.6484	25.3967	2.03845	19.5437	1.62892	1.43714	2.06811
Tb11.02.0865	604	hypothetical protein	0	12.4685	11.7084	27.5689	22.2629	8.49612	10.7681	0.939042	2.21108	1.78553	0.681407	0.863627
Tb11.02.0870	527	Ran-binding protein 1, putative	Nucleo-cytoplasmic transport	55.9811	14.689	240	240	67.9184	21.8556	0.262392	4.28716	4.28716	1.21324	0.39041
Tb11.02.0880	13532	hypothetical protein, conserved	0	23.3574	218.654	240	26.7599	20.4884	42.3402	9.36123	10.2751	1.14567	0.877169	1.81271
Tb11.02.0890	1074	hypothetical protein, conserved	0	9.18271	15.2008	12.7905	15.3324	10.7669	10.0147	1.65537	1.39289	1.6697	1.17252	1.0906
Tb11.02.0900	3171	hypothetical protein, conserved	0	10.6115	40.5489	30.9861	14.2754	10.9674	14.7997	3.82124	2.92006	1.34529	1.03354	1.39469
Tb11.02.0910	1714	hypothetical protein, conserved ,leucine-rich repeat protein (LRRP), putative	LRRP	11.229	#N/A	17.7872	18.9169	12.2849	27.6971	#N/A	1.58405	1.68465	1.09404	2.46658
Tb11.02.0920	618	hypothetical protein, conserved	0	9.885	16.066	28.6825	30.2353	16.3063	9.81808	1.62529	2.90162	3.0587	1.6496	0.99323
Tb11.02.0930	1672	hypothetical protein, conserved	0	21.484	43.036	240	47.1611	20.955	240	2.00316	11.1711	2.19517	0.975378	11.1711
Tb11.02.0940	2190	hypothetical protein, conserved	0	11.2627	23.1216	18.2516	21.0733	12.2189	13.3582	2.05293	1.62053	1.87107	1.08489	1.18606
Tb11.02.0950	897	hypothetical protein, conserved	0	10.7371	19.9233	15.108	20.5786	12.8361	11.7772	1.85557	1.40709	1.91659	1.19549	1.09687
Tb11.02.0960	2064	endosomal integral membrane protein, putative	Vesicular transport	16.6832	12.7526	16.7287	19.2886	11.6038	13.1933	0.764399	1.00273	1.15617	0.695537	0.790812
Tb11.02.0970	2177	hypothetical protein, conserved	0	10.6428	21.9791	19.0124	18.8315	16.2508	16.0522	2.06516	1.78641	1.76941	1.52693	1.50827
Tb11.02.0980	2676	hypothetical protein, conserved	0	18.69	33.6643	240	40.1319	26.261	17.2351	1.80119	12.8411	2.14724	1.40508	0.922157
Tb11.02.0990	3212	hypothetical protein, conserved	0	14.8482	28.4683	240	23.31	13.4981	12.1701	1.9173	16.1636	1.56989	0.909078	0.819634
Tb11.02.1000	2553	hypothetical protein, conserved	0	10.4122	26.8538	143.017	15.6816	11.4124	16.32	2.57906	13.7355	1.50607	1.09606	1.56739
Tb11.02.1010	774	hypothetical protein, conserved	0	9.16655	11.5007	10.5535	14.9774	16.3221	11.2107	1.25463	1.1513	1.63391	1.78061	1.223
Tb11.02.1020	1067	hypothetical protein, conserved	0	13.6836	14.812	63.7822	28.5402	19.1021	14.2452	1.08247	4.66122	2.08573	1.39599	1.04105
Tb11.02.1030	1047	hypothetical protein, conserved	0	9.49595	14.9103	8.85035	11.9916	8.73179	10.1074	1.57017	0.932013	1.26281	0.919527	1.06439
Tb11.02.1040	896	XPA-interacting protein, putative	0	16.621	18.3795	11.7004	21.9446	10.4129	11.0403	1.1058	0.703956	1.3203	0.626491	0.664239
Tb11.02.1070	2702	aminopeptidase, putative ,metallo-peptidase, Clan MA(E) Family M1	Protease or peptidase	16.8853	33.9914	240	71.5969	21.2849	14.9014	2.01308	14.2136	4.2402	1.26056	0.882508
Tb11.02.1080	1335	hypothetical protein, conserved	0	11.0517	19.1058	26.0952	173.149	13.609	9.65363	1.72877	2.3612	15.6672	1.23139	0.873499
Tb11.02.1085	837	40S ribosomal protein S4, putative	Ribosome	165.195	46.9463	240	240	35.5072	240	0.284186	1.45283	1.45283	0.214941	1.45283
Tb11.02.1090	897	40S ribosomal protein S4, putative	Ribosome	172.583	43.1449	240	240	35.8534	240	0.249996	1.39064	1.39064	0.207746	1.39064
Tb11.02.1100	1444	nucleobase/nucleoside transporter 8.1	Nucleotides-Purines	14.5987	11.3142	20.7734	164.415	15.8173	43.9176	0.775013	1.42296	11.2623	1.08347	3.00832
Tb11.02.1105	1821	nucleobase/nucleoside transporter 8.1	Nucleotides-Purines	14.5913	11.2981	18.4524	53.317	15.7853	13.4927	0.774305	1.26462	3.65402	1.08183	0.924708
Tb11.02.1106	1837	nucleobase/nucleoside transporter 8.1	Nucleotides-Purines	14.6499	11.1639	18.529	59.6493	15.352	13.327	0.762045	1.26479	4.07165	1.04793	0.909701
Tb11.02.1110	570	hypothetical protein, conserved	Mitochondrial translation	10.06	15.3048	25.8208	27.7672	11.5983	13.3974	1.52135	2.56668	2.76016	1.15292	1.33175
Tb11.02.1120	1960	adenylosuccinate synthetase, putative	Nucleotides-Purines	63.6526	39.1095	240	100.575	26.1002	240	0.614422	3.77047	1.58006	0.410042	3.77047
Tb11.02.1135	487	dynein light chain, putative ,dynein Tctex1 family, putative	Cytoskeleton	32.251	16.2117	74.2053	240	37.1895	14.416	0.502673	2.30087	7.44164	1.15313	0.446995
Tb11.02.1150	1630	hypothetical protein, conserved	0	10.6404	21.424	12.0332	13.3202	12.4113	9.12059	2.01345	1.1309	1.25185	1.16642	0.857162
Tb11.02.1160	795	calmodulin, putative	Calcium	11.2931	15.7535	240	240	12.2828	7.90807	1.39497	21.2519	21.2519	1.08764	0.700257
Tb11.02.1170	1128	hypothetical protein, conserved	0	9.59521	16.7875	23.8376	19.3953	8.37969	8.71005	1.74957	2.48432	2.02136	0.87332	0.90775
Tb11.02.1180	1740	hypothetical protein, conserved	0	10.2656	13.2938	240	30.347	12.0943	19.0077	1.29498	23.379	2.95618	1.17814	1.85159
Tb11.02.1190	2690	hypothetical protein, conserved	0	23.6525	15.4346	240	240	240	21.6504	0.652556	10.1469	10.1469	10.1469	0.915353
Tb11.02.1200	2574	hypothetical protein, conserved	0	69.6866	49.8967	240	52.1334	26.2829	18.9744	0.716016	3.44399	0.748112	0.377158	0.272282
Tb11.02.1210	3399	leucyl-tRNA synthetase, putative	Translation tRNA	22.4292	25.2058	240	22.8415	14.455	20.4805	1.1238	10.7003	1.01838	0.644473	0.913118
Tb11.02.1220	1338	proteasome regulatory ATPase subunit 2	Ubiquitin & proteasome	10.2403	13.431	47.0653	240	13.4669	9.9048	1.31158	4.59608	23.4368	1.31509	0.967237
Tb11.02.1230	1155	NADH-cytochrome b5 reductase, putative	Mitochondrial electron transport	10.3343	10.9375	18.7228	24.3994	12.5899	12.7139	1.05837	1.81172	2.36101	1.21827	1.23026
Tb11.02.1240	1241	hypothetical protein	0	35.9121	15.8606	240	240	131.12	12.6935	0.441651	6.68298	6.68298	3.65113	0.35346
Tb11.02.1260	927	hypothetical protein, conserved	0	13.3938	11.8535	240	46.4756	17.0266	15.2252	0.885004	17.9188	3.46995	1.27124	1.13674
Tb11.02.1280	5291	subtilisin-like serine peptidase ,serine peptidase, clan SB, family S8-like protein	Protease or peptidase	14.4764	21.9018	240	41.7202	25.6508	19.097	1.51293	16.5787	2.88195	1.7719	1.31918
Tb11.02.1290	1020	hypothetical protein, conserved	0	8.09513	11.2363	22.4564	19.4742	8.36445	8.67454	1.38803	2.77406	2.40567	1.03327	1.07158
Tb11.02.1310	2288	hypothetical protein, conserved	0	17.4493	21.5242	25.0694	19.4236	14.0885	11.7617	1.23352	1.4367	1.11314	0.807397	0.674047
Tb11.02.1320	1149	hypothetical protein, conserved	0	11.1818	12.4897	13.0023	17.2695	9.78302	11.6361	1.11697	1.16281	1.54443	0.874907	1.04063
Tb11.02.1330	1616	hypothetical protein, conserved	0	11.7473	13.7548	17.7602	20.3318	12.6433	12.8384	1.17089	1.51185	1.73076	1.07627	1.09288
Tb11.02.1340	4898	AMP deaminase, putative	Nucleotides-Purines	15.4053	27.9443	67.5655	25.2237	13.6116	19.1841	1.81394	4.38585	1.63734	0.883562	1.24529
Tb11.02.1350	1590	hypothetical protein, conserved	0	12.3357	18.3934	240	27.0442	8.87171	9.92666	1.49107	19.4557	2.19235	0.71919	0.80471
Tb11.02.1370	2094	katanin, putative ,serine peptidase, Clan SJ, family S16, putative	Protease or peptidase	15.7396	18.4363	21.2142	24.655	16.5217	20.5394	1.17133	1.34783	1.56644	1.04969	1.30495
Tb11.02.1380	1994	actin, putative	Cytoskeleton_Actin	9.68582	18.8911	11.684	11.9979	7.987	8.26976	1.95039	1.2063	1.23871	0.824608	0.853801
Tb11.02.1390	2409	N(2), N(2)-dimethylguanosine tRNA methyltransferase, putative	rRNA-tRNA processing	11.4631	21.3625	20.8664	32.6162	9.09526	13.2702	1.86358	1.8203	2.84531	0.793436	1.15764
Tb11.02.1400	1074	glycosyltransferase family-like protein, putative	Glycan synthesis & metabolism	8.78914	15.8311	13.5763	20.8313	8.04375	8.62721	1.80121	1.54467	2.37012	0.915192	0.981576
Tb11.02.1410	3327	hypothetical protein, conserved	0	14.8653	25.0625	240	40.3538	26.0931	240	1.68597	16.145	2.71463	1.75531	16.145
Tb11.02.1420	2393	hypothetical protein, conserved	0	11.8233	25.2173	240	20.7154	13.8134	16.5508	2.13285	20.2989	1.75209	1.16832	1.39985
Tb11.02.1430	1296	hypothetical protein, conserved	0	10.6644	14.4654	12.7832	25.9911	11.184	19.2812	1.35642	1.19869	2.43719	1.04873	1.808
Tb11.02.1440	1085	hypothetical protein, conserved	Mitochondrial pathway	9.37933	13.0679	22.7753	20.9849	10.0698	9.76961	1.39326	2.42825	2.23736	1.07362	1.04161
Tb11.02.1450	918	hypothetical protein, conserved	0	9.11981	13.5433	17.8125	15.7993	9.17575	11.9943	1.48504	1.95316	1.73241	1.00613	1.31519
Tb11.02.1460	2221	hypothetical protein, conserved	0	11.3891	23.0421	25.5809	15.382	11.6254	8.38697	2.02316	2.24608	1.35059	1.02075	0.736403
Tb11.02.1470	2231	hypothetical protein, conserved	0	13.9633	20.0085	70.9003	39.3342	13.4284	13.3459	1.43293	5.0776	2.81696	0.961691	0.955782
Tb11.02.1480	2674	mitochondrial processing peptidase alpha subunit, putative ,metallo-peptidase, Clan ME, Family M16	Mitochondrial biogenesis	15.6558	25.6357	240	195.915	32.3435	11.8347	1.63746	15.3298	12.5139	2.06592	0.755932
Tb11.02.1490	1064	hypothetical protein, conserved	0	13.1644	11.42	41.247	22.844	11.729	7.62505	0.867488	3.13322	1.73528	0.890963	0.579217
Tb11.02.1500	1746	hypothetical protein, conserved	0	12.7306	20.3351	44.1633	19.7468	11.7776	10.6247	1.59734	3.46907	1.55113	0.925142	0.834582
Tb11.02.1510	4090	hypothetical protein, conserved	0	15.7771	37.8285	35.3494	23.4572	18.6925	17.6438	2.39769	2.24056	1.48679	1.18479	1.11832
Tb11.02.1520	666	hypothetical protein, conserved	0	11.8469	13.8431	17.2121	240	10.8382	20.8444	1.1685	1.45288	20.2585	0.914858	1.75948
Tb11.02.1540	5779	hypothetical protein, conserved	0	16.5507	46.2391	240	19.352	21.3517	21.4091	2.79379	14.5009	1.16926	1.29008	1.29355
Tb11.02.1550	1297	hypothetical protein, conserved	0	12.3551	17.5275	240	32.4109	13.3674	10.5146	1.41864	19.4251	2.62327	1.08193	0.851035
Tb11.02.1560	1717	hypothetical protein, conserved	0	9.10484	13.8923	15.5091	20.0239	12.64	16.248	1.52581	1.7034	2.19926	1.38827	1.78455
Tb11.02.1564	1113	leucine-rich repeat protein (LRRP), putative	LRRP	13.6345	#N/A	240	240	16.2431	55.9058	#N/A	17.6024	17.6024	1.19133	4.10032
Tb11.02.1565	675	hypothetical protein	0	17.1872	15.7446	26.6245	231.633	21.7558	47.5532	0.916066	1.54909	13.4771	1.26582	2.76679
Tb11.02.1566	1071	variant surface glycoprotein (VSG)-related, putative	VSG	49.64	#N/A	240	160.135	240	15.2812	#N/A	4.83481	3.22593	4.83481	0.30784
Tb11.02.1580	1233	leucine-rich repeat protein (LRRP), putative	LRRP	9.11892	#N/A	18.9924	25.1734	20.5587	89.6866	#N/A	2.08275	2.76057	2.25451	9.83522
Tb11.02.1600	1972	ubiquitin-like protein, putative	Ubiquitin & proteasome	10.2524	24.8034	42.4505	19.912	11.3747	11.3191	2.41927	4.14053	1.94217	1.10947	1.10404
Tb11.02.1610	642	hypothetical protein, conserved	0	9.69557	20.872	15.7053	14.722	10.7774	15.4557	2.15274	1.61984	1.51843	1.11158	1.5941
Tb11.02.1620	1941	hypothetical protein, conserved	0	15.6197	14.6928	28.0904	22.5924	10.7964	14.3258	0.94066	1.7984	1.44641	0.691205	0.917164
Tb11.02.1630	3708	hypothetical protein, conserved ,predicted C2 domain protein	0	11.7254	34.738	27.4049	24.5659	11.6774	18.3855	2.96263	2.33723	2.0951	0.995909	1.56801
Tb11.02.1640	1613	kinetoplastid-specific dual specificity phosphatase, putative	Phosphatase	9.76558	18.3973	38.8819	13.7518	11.7342	9.60211	1.88389	3.98152	1.40819	1.20159	0.983261
Tb11.02.1660	1894	hypothetical protein, conserved	0	43.1904	27.1125	240	68.6626	52.988	#N/A	0.627745	5.55679	1.58977	1.22685	#N/A
Tb11.02.1670	1732	hypothetical protein, conserved	0	11.1478	15.2675	19.0435	40.4793	12.0086	16.381	1.36955	1.70827	3.63113	1.07721	1.46943
Tb11.02.1680	1939	lectin, putative ,mannose-specific lectin, putative	vesicular transport	22.8716	20.6979	240	70.0874	20.1786	33.5396	0.904961	10.4934	3.06439	0.882257	1.46643
Tb11.02.1690	2947	hypothetical protein, conserved	0	33.5825	20.8683	240	219.326	25.4348	12.4123	0.621404	7.14657	6.53097	0.757381	0.369604
Tb11.02.1710	1416	hypothetical protein, conserved	Lipids & fatty acids	9.70175	13.5831	11.3616	11.897	9.15983	8.13135	1.40007	1.17109	1.22627	0.944142	0.838132
Tb11.02.1720	3726	hypothetical protein, conserved	0	11.1216	35.7983	15.3041	21.3671	18.4856	35.7316	3.2188	1.37607	1.92122	1.66212	3.2128
Tb11.02.1730	737	hypothetical protein, conserved	0	12.5925	12.2537	13.1437	18.2587	7.74699	8.33954	0.9731	1.04377	1.44997	0.615208	0.662264
Tb11.02.1750	743	hypothetical protein, conserved	0	9.94554	13.9865	10.4563	13.8259	9.02647	11.2465	1.40631	1.05135	1.39016	0.90759	1.13081
Tb11.02.1760	778	hypothetical protein, conserved	0	9.19223	9.78428	7.67116	11.1402	7.20819	7.72717	1.06441	0.834526	1.21191	0.784161	0.840619
Tb11.02.1770	1026	hypothetical protein, conserved	0	9.2076	15.0426	8.169	8.2665	10.1765	8.27505	1.63372	0.887202	0.897791	1.10523	0.89872
Tb11.02.1810	4763	hypothetical protein, conserved	0	20.8168	26.0711	106.955	40.5887	23.3669	62.2625	1.2524	5.13789	1.9498	1.1225	2.99097
Tb11.02.1830	470	40S ribosomal protein S12	Ribosome	208.853	240	240	240	240	240	1.14913	1.14913	1.14913	1.14913	1.14913
Tb11.02.1840	645	60S ribosomal protein L18, putative	Ribosome	151.743	52.4203	90.9167	240	240	240	0.345454	0.599149	1.58162	1.58162	1.58162
Tb11.02.1860	1503	hypothetical protein, conserved	0	11.405	13.2704	50.5834	29.2035	10.9921	13.3263	1.16356	4.43521	2.56059	0.963801	1.16847
Tb11.02.1880	587	hypothetical protein, conserved	0	8.12144	15.12	14.0677	15.4353	11.1681	9.55335	1.86174	1.73216	1.90057	1.37514	1.17631
Tb11.02.1890	2778	hypothetical protein, conserved	0	13.7754	14.5678	240	42.3211	15.7411	32.4325	1.05752	17.4223	3.07222	1.1427	2.35438
Tb11.02.1900	1966	hypothetical protein, conserved	0	11.3326	26.8592	20.9888	18.8511	11.0575	18.486	2.37008	1.85207	1.66344	0.97573	1.63123
Tb11.02.1910	954	hypothetical protein, conserved	0	35.8445	21.4962	240	240	67.9581	21.082	0.599707	6.6956	6.6956	1.89592	0.588153
Tb11.02.1920	696	hypothetical protein, conserved	0	13.5376	20.6746	16.0052	32.6844	19.4818	16.4564	1.5272	1.18227	2.41434	1.43909	1.2156
Tb11.02.1930	6591	ATP-dependent RNA helicase, putative ,DEAD/DEAH box RNA helicase, putative	RNA processing	15.6739	48.9756	240	19.2432	16.3484	26.8408	3.12467	15.3121	1.22773	1.04303	1.71246
Tb11.02.1940	1488	hypothetical protein, conserved	0	9.89252	23.2504	15.2224	24.5571	10.8911	16.7674	2.3503	1.53878	2.4824	1.10094	1.69496
Tb11.02.1950	1955	hypothetical protein, conserved	0	10.0224	18.8665	15.4594	10.7153	8.12185	13.5865	1.88243	1.54249	1.06914	0.810369	1.35562
Tb11.02.1980	1658	hypothetical protein, conserved	0	11.8376	22.2369	240	36.7504	11.6679	17.984	1.8785	20.2744	3.10455	0.985661	1.51923
Tb11.02.1990	3391	ferric reductase, putative ,ferric reductase transmembrane component, putative	Enzyme	14.2235	14.8528	67.0327	43.1039	23.9329	19.5314	1.04424	4.7128	3.03046	1.68263	1.37318
Tb11.02.2030	419	hypothetical protein, conserved	RNA binding	198.01	29.8943	240	240	240	19.1258	0.150974	1.21206	1.21206	1.21206	0.0965898
Tb11.02.2040	502	hypothetical protein, conserved	RNA binding	199.323	25.1225	240	240	52.0669	103.261	0.126039	1.20408	1.20408	0.261219	0.518061
Tb11.02.2050	3342	protein kinase, putative ,serine/threonine protein kinase, putative	Protein kinase	12.9942	26.4325	33.0236	29.62	22.9086	51.3749	2.03417	2.5414	2.27947	1.76298	3.95366
Tb11.02.2060	1860	radial spoke protein RSP4/6, putative	Cytoskeleton	20.9115	15.6052	240	25.099	18.4942	20.9627	0.746246	11.4769	1.20024	0.884403	1.00245
Tb11.02.2070	1998	long-chain-fatty-acid-CoA ligase, putative ,acyl-CoA synthetase, putative ,fatty acid thiokinase (long chain), putative	Lipids & fatty acids	11.9115	17.8698	20.2254	13.2601	9.13073	14.7954	1.50021	1.69797	1.11322	0.766548	1.24211
Tb11.02.2080	2882	hypothetical protein, conserved	0	11.5762	62.0719	19.4713	13.6039	9.74771	18.6438	5.36201	1.68201	1.17516	0.842044	1.61053
Tb11.02.2090	5416	hypothetical protein, conserved	0	21.195	31.2373	240	42.6509	23.2697	240	1.47381	11.3234	2.01231	1.09789	11.3234
Tb11.02.2100	4346	hypothetical protein, conserved	0	12.2326	31.6386	151.041	22.4468	15.8963	25.4555	2.58642	12.3474	1.835	1.2995	2.08096
Tb11.02.2110	772	N-acetyltransferase subunit ARD1	Enzyme	10.2843	11.8313	13.832	26.1947	10.4233	14.6828	1.15042	1.34497	2.54707	1.01352	1.4277
Tb11.02.2120	1371	nucleoporin 48	Nucleo-cytoplasmic transport	10.9762	18.2684	15.0218	13.5048	10.2263	11.189	1.66437	1.36858	1.23037	0.931682	1.01939
Tb11.02.2130	1310	hypothetical protein, conserved	0	12.0179	11.8021	31.2389	28.277	9.84755	23.1711	0.982044	2.59938	2.35292	0.819409	1.92805
Tb11.02.2150	1053	hypothetical protein, conserved	0	9.95465	21.3375	13.5523	31.3242	11.8563	12.0611	2.14347	1.36141	3.14669	1.19103	1.2116
Tb11.02.2160	716	small GTPase, putative ,small GTP-binding protein Rab5b, putative	Vesicular transport	10.3911	19.212	22.8166	16.6332	8.89932	7.74864	1.84888	2.19577	1.60071	0.856435	0.745698
Tb11.02.2190	858	hypothetical protein, conserved	0	9.04098	15.0508	10.2373	11.5792	8.7912	8.36932	1.66473	1.13233	1.28075	0.972373	0.925709
Tb11.02.2210	1990	protein kinase A regulatory subunit	Protein kinase	100.914	29.1004	240	40.5856	16.1028	#N/A	0.288368	2.37826	0.402179	0.159569	#N/A
Tb11.02.2230	2334	hypothetical protein, conserved	0	12.5501	14.9528	16.4461	22.9957	17.9155	11.343	1.19145	1.31044	1.83232	1.42752	0.90382
Tb11.02.2240	3156	calpain-like protein, putative	Protease or peptidase	14.0361	34.4454	17.95	14.2621	10.4421	26.0128	2.45405	1.27884	1.0161	0.743941	1.85327
Tb11.02.2250	4607	hypothetical protein, conserved	Mitochondrial translation	11.3981	64.4625	13.8886	11.9511	9.8417	8.91575	5.65557	1.21851	1.04852	0.863454	0.782216
Tb11.02.2260	2162	kinesin, putative ,MCAK-like kinesin, putative ,kinesin family member 6, putative	Cytoskeleton	16.5566	17.6349	240	46.2292	14.6159	75.5505	1.06512	14.4957	2.79219	0.882781	4.56315
Tb11.02.2270	330	hypothetical protein, conserved	0	14.1114	11.3231	26.8971	132.406	40.42	14.009	0.802409	1.90605	9.38295	2.86435	0.992742
Tb11.02.2280	1041	hypothetical protein, conserved	Mitochondrial pathway	11.0303	11.0634	18.6433	29.225	11.5586	9.6713	1.003	1.69019	2.64952	1.04789	0.876794
Tb11.02.2300	5429	mitochondrial DNA polymerase I protein B	Mitochondrial DNA	16.2974	20.6145	73.3263	35.2758	18.4551	13.9524	1.2649	4.49926	2.1645	1.13239	0.856114
Tb11.02.2310	932	prostaglandin f synthase	Lipids & fatty acids	28.7522	33.5959	240	240	240	240	1.16846	8.34718	8.34718	8.34718	8.34718
Tb11.02.2320	1392	hypothetical protein, conserved	0	9.27334	39.5305	10.8355	12.658	8.8884	9.39797	4.26282	1.16846	1.36499	0.95849	1.01344
Tb11.02.2330	573	hypothetical protein, conserved	0	9.10392	10.1701	21.9982	27.1459	8.15216	9.93549	1.11711	2.41635	2.98179	0.895456	1.09134
Tb11.02.2340	1000	hypothetical protein, conserved	0	10.0191	15.812	11.5268	18.9456	11.9642	8.67722	1.57819	1.15049	1.89095	1.19414	0.866071
Tb11.02.2350	1554	paraflagellar rod component, putative	Cytoskeleton	8.92908	25.3942	25.575	11.8388	8.23721	8.60288	2.84399	2.86424	1.32587	0.922515	0.963468
Tb11.02.2360	1603	hypothetical protein	0	166.8	17.0585	240	240	22.9872	240	0.102269	1.43884	1.43884	0.137812	1.43884
Tb11.02.2370	870	hypothetical protein	0	10.6609	12.2045	13.2825	33.4141	10.3291	9.96561	1.14479	1.2459	3.13426	0.96887	0.934778
Tb11.02.2380	2325	retrotransposon hot spot protein (RHS, pseudogene), putative ,retrotransposon hot spot protein (RHS), degenerate	RHS	22.5322	#N/A	240	43.0733	22.2516	30.7162	#N/A	10.6514	1.91164	0.987547	1.36321
Tb11.02.2390	1354	pyruvate dehydrogenase (lipoamide) kinase, putative	Citric acid cycle	10.2699	13.8097	22.3564	21.7126	11.1605	20.9913	1.34467	2.17687	2.11419	1.08672	2.04396
Tb11.02.2400	814	hypothetical protein	0	16.0344	12.0115	35.0201	240	20.1275	10.7576	0.74911	2.18406	14.9678	1.25527	0.670909
Tb11.02.2410	3244	clathrin coat assembly protein, putative	Vesicular transport	11.4425	13.7179	35.9182	20.6603	13.5802	11.1492	1.19885	3.13902	1.80558	1.18682	0.974367
Tb11.02.2420	558	hypothetical protein, conserved	0	8.68176	16.5475	10.8417	9.58605	7.01539	9.46936	1.90601	1.24879	1.10416	0.808061	1.09072
Tb11.02.2430	517	60S ribosomal protein L17, putative	Ribosome	151.997	32.0977	47.0774	240	240	240	0.211173	0.309726	1.57898	1.57898	1.57898
Tb11.02.2440	1416	hypothetical protein, conserved	0	9.721	17.2363	17.7366	13.3312	8.08197	10.0183	1.7731	1.82456	1.37138	0.831393	1.03059
Tb11.02.2450	1262	hypothetical protein, conserved	0	22.9124	11.9173	42.8529	240	12.355	25.1629	0.520124	1.87029	10.4747	0.539226	1.09822
Tb11.02.2460	1364	hypothetical protein, conserved	Mitochondrial pathway	10.1792	21.3168	19.7349	23.1519	11.6359	12.3813	2.09416	1.93875	2.27444	1.14311	1.21634
Tb11.02.2470	1519	hypothetical protein, conserved	0	11.484	21.9136	53.2491	240	24.1506	17.5433	1.9082	4.63683	20.8987	2.10298	1.52763
Tb11.02.2480	743	hypothetical protein, conserved	Mitochondrial pathway	12.3491	17.3524	17.0219	11.8827	7.57238	7.43336	1.40515	1.37839	0.962227	0.613192	0.601934
Tb11.02.2490	936	hypothetical protein, conserved	0	15.116	16.3324	173.053	240	14.1277	21.8282	1.08047	11.4483	15.8772	0.934618	1.44404
Tb11.02.2500	1293	hypothetical protein, conserved	0	11.0358	19.33	8.87516	8.97997	9.64587	8.11666	1.75157	0.804212	0.813709	0.874049	0.735481
Tb11.02.2510	1737	guanine nucleotide-binding beta subunit-like protein ,G-protein (beta)-like protein ,beta transducin-like protein	Signalling	23.4151	20.1	240	240	20.292	12.9757	0.858422	10.2498	10.2498	0.866623	0.554161
Tb11.02.2520	1270	hypothetical protein, conserved ,predicted ankyrin repeat family protein	0	27.8576	16.9853	78.5557	111.578	29.4609	13.4282	0.609718	2.8199	4.0053	1.05755	0.482031
Tb11.02.2530	852	hypothetical protein, conserved	0	13.4366	17.7012	22.1495	75.6212	14.4317	11.7581	1.31739	1.64844	5.628	1.07406	0.875079
Tb11.02.2540	783	hypothetical protein, conserved	0	10.4909	14.5445	21.6136	17.719	10.2999	12.3173	1.38639	2.06022	1.68898	0.981794	1.17409
Tb11.02.2550	1632	AAA ATPase, putative	Enzyme	9.26642	16.0771	11.3847	9.82953	8.79233	8.04389	1.73499	1.22859	1.06077	0.948838	0.868069
Tb11.02.2560	2378	hypothetical protein, conserved	0	13.202	28.408	240	23.1063	13.2874	33.0588	2.1518	18.1791	1.75022	1.00647	2.50407
Tb11.02.2600	1544	transcription elongation factor s-II, putative	RNA synthesis II	11.9296	12.819	22.7972	20.4786	14.8041	8.43537	1.07455	1.91099	1.71663	1.24096	0.707098
Tb11.02.2610	1412	hypothetical protein, conserved ,predicted WD40 repeat protein	0	9.45125	17.9791	12.8051	14.107	13.1966	8.91173	1.9023	1.35486	1.49261	1.39628	0.942915
Tb11.02.2620	1907	ATP-dependent DEAD/H RNA helicase, putative ,ATP- dependent RNA helicase, putative	rRNA-tRNA processing	9.06556	18.8164	13.3178	15.7	8.76782	13.9245	2.07559	1.46905	1.73183	0.967157	1.53597
Tb11.02.2630	3157	kinetoplastid-specific phospho-protein phosphatase, putative	Protein phosphatase	11.3711	42.213	20.3751	18.8221	12.215	9.47879	3.7123	1.79183	1.65526	1.07421	0.833586
Tb11.02.2640	2155	dynein intermediate chain IC78, putative	Cytoskeleton	19.488	25.5964	240	34.8052	20.4989	15.5916	1.31345	12.3153	1.78598	1.05187	0.800061
Tb11.02.2650	1560	TFIIF-stimulated CTD phosphatase, putative	Protein phosphatase	17.1054	28.5109	120.461	60.4756	19.9814	34.6784	1.66678	7.04225	3.53547	1.16814	2.02734
Tb11.02.2670	5121	hypothetical protein, conserved	0	11.5819	44.8169	71.8604	18.1262	14.61	18.6608	3.86957	6.20454	1.56504	1.26145	1.6112
Tb11.02.2680	945	hypothetical protein, conserved	0	12.0886	11.2783	19.6005	27.0138	11.5804	8.1536	0.932963	1.6214	2.23465	0.957961	0.674485
[truncated: 6,128 more rows]
