# Supplementary material
Source: HighWire-hosted journal article supplement (doi:10.1101/rna.038430.113)
Supplement: Supplementary_Table_S3.xlsx [file Supplementary_Table_S3.xlsx]

## Sheet: CNOT10 up
id	Description	Class	foldChange (CNOT10/WT)	padj	HL change (CNOT10/WT)
Tb11.02.0420	hypothetical protein, conserved	0	3.90155	0.00616591	0.868107
Tb927.2.4900	hypothetical protein, conserved	0	3.38917	0.00772082	0.897794
Tb927.2.4750	hypothetical protein, conserved	0	3.49263	0.00619187	0.905378
Tb927.2.5830	hypothetical protein, conserved	0	5.30925	0.00168675	0.910039
Tb927.5.1670	hypothetical protein, conserved	0	3.92886	0.00292609	1.06266
Tb927.6.3610	hypothetical protein, conserved	0	4.51677	0.00493285	1.06378
Tb927.1.650	hypothetical protein, conserved	0	3.71553	0.00732452	1.16356
Tb11.01.4150	hypothetical protein, conserved	0	4.2715	0.00919471	1.17092
Tb927.10.1860	hypothetical protein, conserved	0	3.97427	0.00303451	1.23526
Tb11.02.4160	hypothetical protein, conserved	0	3.89393	0.00337504	1.30416
Tb09.160.2230	hypothetical protein, conserved	0	3.61196	0.00995909	1.49569
Tb11.01.0300	hypothetical protein, conserved	0	4.7185	0.00514463	1.66583
Tb927.8.6050	hypothetical protein, conserved	0	3.90465	0.0036902	1.6759
Tb927.10.6890	hypothetical protein	0	4.32187	0.00119048	1.72973
Tb11.02.4330	hypothetical protein, conserved	0	4.302	0.00196807	1.88636
Tb927.8.7030	hypothetical protein, conserved	0	3.30436	0.00988857	1.89662
Tb927.6.4310	hypothetical protein, conserved	0	4.2261	0.00139367	1.97165
Tb927.7.2950	hypothetical protein, conserved	0	4.33735	0.00223214	2.31902
Tb11.01.3490	hypothetical protein, conserved	0	4.49839	0.00330595	2.68159
Tb11.01.4190	hypothetical protein, conserved	0	3.4785	0.00905036	3.2868
Tb927.10.4810	hypothetical protein, conserved	0	5.86657	0.000126055	5.7727
Tb09.211.1300	hypothetical protein, conserved	0	3.59098	0.00360638	6.68639
Tb927.6.2200	hypothetical protein, conserved	0	5.36199	0.000140571	7.32771
Tb927.10.13770	hypothetical protein, conserved	0	3.90308	0.00670572	7.94783
Tb927.10.13920	hypothetical protein, conserved	0	4.06767	0.0055521	14.109
Tb927.5.4050	hypothetical protein, conserved	0	3.922	0.00367644	20.6267
Tb11.01.1440	glycine synthase, putative	Amino acid metabolism	3.88016	0.00785207	1.51194
Tb927.2.5980	ATP-dependent Clp protease subunit, heat shock protein 100 (HSP100), putative ,serine peptidase, putative	Chaperone	4.33095	0.0025428	16.5596
Tb927.10.8540	chaperone protein DNAj, putative	Chaperone	4.35153	0.00148964	16.9826
Tb927.10.10480	histone H2B, putative	Chromatin	4.01488	0.00533384	1.14689
Tb927.10.10520	histone H2B, putative	Chromatin	4.01488	0.00533384	1.14689
Tb927.7.2860	histone H2A, putative	Chromatin	3.67529	0.00357493	2.60534
Tb927.7.2870	histone H2A, putative	Chromatin	3.67529	0.00357493	2.60534
Tb927.7.2940	histone H2A, putative	Chromatin	3.67529	0.00357493	2.60534
Tb927.7.2930	histone H2A, putative	Chromatin	3.74579	0.00318784	2.84305
Tb927.7.2890	histone H2A, putative	Chromatin	3.74075	0.00318784	2.86575
Tb927.7.2830	histone H2A, putative	Chromatin	3.74094	0.00318784	2.86575
Tb927.7.2840	histone H2A, putative	Chromatin	3.74094	0.00318784	2.86575
Tb927.7.2850	histone H2A, putative	Chromatin	3.74094	0.00318784	2.86575
Tb927.7.2880	histone H2A, putative	Chromatin	3.74094	0.00318784	2.86575
Tb927.7.2900	histone H2A, putative	Chromatin	3.74094	0.00318784	2.86575
Tb927.7.2910	histone H2A, putative	Chromatin	3.74094	0.00318784	2.86575
Tb927.7.2920	histone H2A, putative	Chromatin	3.74094	0.00318784	2.86575
Tb927.7.2820	histone H2A, putative	Chromatin	3.67052	0.00377098	2.94939
Tb11.03.0230	isocitrate dehydrogenase, putative	Citric acid cycle	3.65451	0.00626271	24.2238
Tb927.10.7850	protein-L-isoaspartate, putative	Enzyme	4.15946	0.00230844	2.54454
Tb927.4.4980	adrenodoxin precursor, putative	Enzyme	3.77292	0.00673009	5.00155
Tb927.10.8460	glucose transporter, putative	Glucose & glycerol	4.26907	0.000727963	7.87337
Tb927.10.8480	glucose transporter, putative	Glucose & glycerol	4.22166	0.000824896	8.01292
Tb927.10.8440	glucose transporter 1B	Glucose & glycerol	4.26516	0.000761685	8.06772
Tb927.10.8470	glucose transporter, putative	Glucose & glycerol	4.21651	0.000835783	8.19678
Tb927.10.8450	glucose transporter ,glucose transporter 1E	Glucose & glycerol	4.03764	0.00118406	8.25713
Tb09.211.2730	Gim5A protein ,glycosomal membrane protein	Glycosome biogenesis	4.52943	0.000440052	1
Tb09.211.2740	Gim5B protein ,glycosomal membrane protein	Glycosome biogenesis	4.78168	0.000282407	1
Tb927.10.4040	short-chain dehydrogenase, putative	Lipids & fatty acids	4.11775	0.00127349	24.631
Tb927.7.840	hypothetical protein, conserved	Mitochondrial pathway	3.68119	0.00805582	8.84965
Tb927.10.3040	hypothetical protein, conserved	Mitochondrial pathway	5.88286	0.00367666	13.5084
Tb927.7.3590	hypothetical protein, conserved	Mitochondrial pathway	3.98822	0.00467803	18.296
Tb927.2.6070	hypothetical protein, conserved	Mitochondrial RNA	4.94715	0.00045218	8.27598
Tb927.7.3240	hypothetical protein, conserved	Mitochondrial translation	3.98466	0.00367644	8.17964
Tb927.6.1010	cysteine peptidase precursor ,cysteine peptidase, Clan CA, family C1, Cathepsin L-like	Protease or peptidase	5.15368	0.000306418	8.06244
Tb927.6.960	cysteine peptidase precursor ,cysteine peptidase, Clan CA, family C1, Cathepsin L-like	Protease or peptidase	5.15368	0.000306418	8.06244
Tb927.6.980	cysteine peptidase precursor ,cysteine peptidase, Clan CA, family C1, Cathepsin L-like	Protease or peptidase	5.34286	0.000211017	8.19604
Tb927.6.970	cysteine peptidase precursor ,cysteine peptidase, Clan CA, family C1, Cathepsin L-like	Protease or peptidase	5.15389	0.000306418	8.21692
Tb927.6.1060	cysteine peptidase precursor ,cysteine peptidase, Clan CA, family C1, Cathepsin L-like	Protease or peptidase	5.18009	0.000293185	8.25429
Tb927.6.1020	cysteine peptidase precursor ,cysteine peptidase, Clan CA, family C1, Cathepsin L-like	Protease or peptidase	5.30844	0.000221403	8.3149
Tb927.6.1000	cysteine peptidase precursor ,cysteine peptidase, Clan CA, family C1, Cathepsin L-like	Protease or peptidase	5.4297	0.000184599	8.3185
Tb927.6.1030	cysteine peptidase precursor ,cysteine peptidase, Clan CA, family C1, Cathepsin L-like	Protease or peptidase	5.4242	0.000184599	8.40105
Tb927.6.1040	cysteine peptidase precursor ,cysteine peptidase, Clan CA, family C1, Cathepsin L-like	Protease or peptidase	5.4242	0.000184599	8.40105
Tb927.6.990	cysteine peptidase precursor ,cysteine peptidase, Clan CA, family C1, Cathepsin L-like	Protease or peptidase	5.42968	0.000184599	8.54733
Tb927.10.2440	metacaspase MCA4 ,cysteine peptidase, Clan CD, family C13, putative	Protease or peptidase	3.73733	0.00253351	8.58358
Tb927.6.1050	cysteine peptidase precursor ,cysteine peptidase, Clan CA, family C1, Cathepsin L-like	Protease or peptidase	5.40085	0.000191512	8.59204
Tb927.6.4290	hypothetical protein, conserved (pseudogene)	pseudogene	4.26344	0.00127126	2.04732
Tb09.v1.0380	spermidine synthase	Redox pathways	3.3867	0.0070905	6.34521
Tb927.10.5030	ubiquitin/ribosomal protein S27a, putative	Ribosome	3.34913	0.00852623	1
Tb11.02.0500	60S ribosomal protein L37, putative	Ribosome	3.52029	0.00614022	1
Tb927.10.6370	60S ribosomal proteins L37, putative	Ribosome	3.62923	0.00308776	1
Tb927.10.5460	60S ribosomal protein L24, putative	Ribosome	3.70359	0.00768218	1
Tb927.6.5130	60S acidic ribosomal protein P2, putative	Ribosome	3.74597	0.00565723	1
Tb927.10.5480	60S ribosomal protein L24, putative	Ribosome	3.86359	0.00333921	1
Tb927.6.5120	60S acidic ribosomal protein P2, putative	Ribosome	4.0053	0.00121498	1
Tb927.5.1110	60S ribosomal protein L2, putative ,60S ribosomal protein L8, putative	Ribosome	4.02163	0.00338905	1
Tb927.10.5360	40S ribosomal protein S10, putative	Ribosome	4.07948	0.00134981	1
Tb927.10.5370	40S ribosomal protein S10, putative	Ribosome	4.09697	0.00127126	1
Tb11.02.1085	40S ribosomal protein S4, putative	Ribosome	4.22462	0.00161651	1
Tb11.02.1090	40S ribosomal protein S4, putative	Ribosome	4.29867	0.00129298	1
Tb927.10.1590	ribosomal protein L36, putative	Ribosome	4.30935	0.0056097	1
Tb927.7.5020	60S ribosomal protein L19, putative	Ribosome	4.3448	0.00127126	1
Tb927.7.5000	60S ribosomal protein L19, putative	Ribosome	4.37443	0.00123793	1
Tb11.01.7960	60S ribosomal protein L2, putative ,60S ribosomal protein L8, putative	Ribosome	4.6415	0.00123423	1
Tb09.211.0865	60S ribosomal protein L37, putative	Ribosome	4.74387	0.00052423	1
Tb09.160.2550	ribosomal protein S7, putative	Ribosome	4.69962	0.00094424	1.16906
Tb09.160.2490	ribosomal protein S7, putative	Ribosome	4.7989	0.000587925	1.3362
Tb09.244.2725	ribosomal protein L36, putative	Ribosome	4.18944	0.00366792	1.33635
Tb927.4.5170	ribosomal protein L7/L12, putative	Ribosome	5.13034	0.00210779	1.54055
Tb11.02.0840	RNA-binding protein, putative	RNA binding	4.336	0.00199127	2.13868
Tb927.10.7190	D-tyrosyl-tRNA deacylase, putative	rRNA-tRNA processing	4.88155	0.00119048	6.50516
Tb11_snoRNA_0041	H/ACA snoRNA, TB11Cs2H1 ,snoRNA TBR17	SNO	4.25302	0.00181205	4.52501
Tb11_snoRNA_0038	H/ACA snoRNA, TB11Cs2H1 ,snoRNA TBR17	SNO	3.91959	0.00318784	4.55097
Tb11.01.1230	ADP-ribosylation factor GTPase activating protein, putative	Vesicular transport	6.3554	0.000232484	1.1254
Tb927.8.2861	SRP RNA, 7SL	Vesicular transport	5.24582	0.000340004	6.00218
Tb927.7.1840	zinc finger protein, putative	Zinc finger	3.28444	0.00999014	1.41571
Tb927.7.1880	zinc finger protein, putative	Zinc finger	3.28444	0.00999014	1.41571

## Sheet: CNOT10 down
geneID v5	Description	Class	foldChange (CNOT10/WT)	padj	HL change (CNOT10/WT)
Tb927.5.2000	hypothetical protein	0	0.14377	0.000195932	0.187321
Tb11.01.5680	hypothetical protein, conserved	0	0.14346	0.000184599	0.227453
Tb927.7.6690	hypothetical protein	0	0.0935171	0.000245605	0.353446
Tb927.3.4270	hypothetical protein, conserved	0	0.227347	0.000434012	0.357123
Tb927.7.6700	hypothetical protein	0	0.187943	0.00275907	0.871646
Tb927.2.5870	hypothetical protein, conserved	0	0.283544	0.00512405	0.872236
Tb927.8.5110	hypothetical protein, conserved	0	0.186787	0.000191512	0.895202
Tb927.7.2090	hypothetical protein, conserved	0	0.1547	0.00090784	0.914518
Tb927.7.4470	hypothetical protein, conserved	0	0.125059	2.69968e-05	1
Tb927.10.8940	hypothetical protein, conserved	0	0.177079	0.000103148	1
Tb927.3.1900	hypothetical protein, conserved	0	0.127121	2.82194e-06	1.03111
Tb927.5.1420	hypothetical protein	0	0.10658	0.000127102	1.08788
Tb927.10.15700	hypothetical protein, conserved	0	0.0747327	1.64077e-08	1.13452
Tb927.7.810	hypothetical protein, conserved	0	0.104654	0.00189331	1.21598
Tb927.6.3090	hypothetical protein, conserved	0	0.213704	0.000631285	1.22369
Tb927.8.3540	hypothetical protein, conserved	0	0.18902	0.000336824	1.30348
Tb11.02.1660	hypothetical protein, conserved	0	0.197343	0.00193389	1.34976
Tb927.5.1770	hypothetical protein, conserved	0	0.117928	1.25085e-06	1.36143
Tb11.47.0011	hypothetical protein, conserved	0	0.165901	8.73848e-05	1.36778
Tb927.5.4520	hypothetical protein, conserved	0	0.166005	0.00205752	1.40088
Tb927.5.1760	hypothetical protein, conserved	0	0.274946	0.00344432	1.47142
Tb927.10.3400	hypothetical protein, conserved	0	0.0659124	1.22041e-07	1.50543
Tb927.10.3310	hypothetical protein, conserved	0	0.261902	0.00490571	1.51574
Tb11.01.7095	hypothetical protein	0	0.0728974	0.00870436	1.52626
Tb927.3.4610	hypothetical protein, conserved	0	0.278795	0.00399641	1.56302
Tb927.3.5160	hypothetical protein, conserved	0	0.261348	0.00367644	1.5753
Tb927.10.8820	hypothetical protein, conserved	0	0.305122	0.00716132	1.57941
Tb927.10.13280	hypothetical protein, conserved	0	0.212604	0.00059179	1.61661
Tb927.3.5220	hypothetical protein, conserved	0	0.24379	0.00254608	1.62048
Tb927.10.1450	hypothetical protein, conserved	0	0.0686643	3.61099e-09	1.62605
Tb927.4.4880	hypothetical protein, conserved	0	0.280356	0.00824018	1.68997
Tb927.5.1400	hypothetical protein	0	0.120326	0.000938848	1.70542
Tb927.7.7400	hypothetical protein, conserved	0	0.132246	1.06171e-05	1.71808
Tb927.8.8340	hypothetical protein, conserved	0	0.196335	0.0022926	1.7314
Tb927.5.1850	hypothetical protein, conserved	0	0.167323	4.62803e-05	1.75223
Tb927.2.4050	hypothetical protein, conserved	0	0.118044	2.65797e-06	1.76962
Tb927.10.5450	hypothetical protein, conserved	0	0.258293	0.0065381	1.78123
Tb11.02.0350	hypothetical protein, conserved	0	0.233101	0.00690968	1.82377
Tb927.10.2920	hypothetical protein, conserved	0	0.25021	0.00253351	1.85441
Tb11.47.0026	hypothetical protein, conserved	0	0.214453	0.00198905	1.85797
Tb927.1.1420	hypothetical protein, conserved	0	0.242029	0.00348768	1.89913
Tb927.4.2070	antigenic protein, putative	0	0.0416046	3.636e-07	1.90924
Tb11.01.2380	hypothetical protein, conserved	0	0.316065	0.00847197	1.93885
Tb927.5.2480	hypothetical protein, conserved	0	0.154042	0.00845242	1.94663
Tb927.10.15660	hypothetical protein, conserved	0	0.239293	0.00353308	1.9715
Tb11.01.4400	hypothetical protein	0	0.300476	0.00765064	1.97849
Tb927.7.2160	hypothetical protein, conserved	0	0.057173	2.69069e-08	2.03031
Tb927.4.3120	hypothetical protein, conserved	0	0.195789	0.00221892	2.07324
Tb927.5.2620	hypothetical protein, conserved	0	0.216037	0.00284269	2.10525
Tb927.7.2170	hypothetical protein, conserved	0	0.198749	0.000332573	2.14106
Tb927.7.5210	hypothetical protein, conserved	0	0.334299	0.00995909	2.15194
Tb927.8.4200	hypothetical protein, conserved	0	0.267019	0.00845242	2.17149
Tb927.7.7050	hypothetical protein, conserved	0	0.326702	0.00920193	2.18454
Tb09.211.1800	hypothetical protein, conserved	0	0.0599148	4.62134e-09	2.21463
Tb927.10.11250	hypothetical protein, conserved	0	0.122462	5.4522e-05	2.21574
Tb927.7.4370	hypothetical protein, conserved	0	0.147274	5.4522e-05	2.26175
Tb927.10.5880	Proteophosphoglycan, putative	0	0.211391	0.000900423	2.26275
Tb927.7.2240	hypothetical protein, conserved	0	0.283007	0.00845242	2.26292
Tb927.5.3330	hypothetical protein, conserved	0	0.244264	0.00133944	2.29594
Tb927.5.3230	hypothetical protein, conserved	0	0.313528	0.00884346	2.2966
Tb11.01.5970	hypothetical protein, conserved	0	0.210762	0.00165386	2.32411
Tb927.4.710	hypothetical protein, conserved	0	0.159849	0.000542564	2.34186
Tb927.8.6600	hypothetical protein, conserved	0	0.213982	0.00567046	2.38937
Tb11.01.2730	hypothetical protein, conserved	0	0.153605	3.34952e-05	2.43303
Tb09.211.0180	hypothetical protein, conserved	0	0.258279	0.0047757	2.48295
Tb927.10.12820	hypothetical protein, conserved	0	0.302668	0.00486454	2.50635
Tb927.8.5080	hypothetical protein, conserved	0	0.273613	0.00685684	2.53066
Tb11.01.5930	hypothetical protein, conserved	0	0.319501	0.0089656	2.62336
Tb927.10.5260	hypothetical protein, conserved	0	0.263953	0.00421969	2.66722
Tb927.3.1660	hypothetical protein, conserved	0	0.237572	0.00426327	2.68448
Tb927.10.10990	hypothetical protein, conserved ,predicted WD40 repeat protein	0	0.288551	0.00897316	2.6955
Tb11.02.0110	hypothetical protein, conserved	0	0.247947	0.00270511	2.71847
Tb927.6.4100	hypothetical protein, conserved	0	0.188678	0.00094424	2.86851
Tb11.01.2250	hypothetical protein, conserved	0	0.25756	0.00254608	2.88631
Tb927.10.4200	hypothetical protein, conserved	0	0.0904775	1.33559e-05	2.89218
Tb927.5.3290	hypothetical protein, conserved	0	0.180974	0.000206062	2.96602
Tb09.211.1620	hypothetical protein, conserved	0	0.279276	0.00367644	3.10034
Tb927.4.3060	hypothetical protein, conserved	0	0.252758	0.0070905	3.33864
Tb927.10.840	hypothetical protein, conserved	0	0.159883	0.000191512	3.38665
Tb927.10.2650	hypothetical protein, conserved	0	0.299319	0.00888704	3.41138
Tb927.3.1680	hypothetical protein, conserved	0	0.189996	0.000704017	3.42761
Tb927.2.2090	hypothetical protein	0	0.147578	0.000158894	3.50175
Tb927.7.4130	hypothetical protein, conserved	0	0.0709054	0.000206062	3.62447
Tb09.160.3240	hypothetical protein, conserved	0	0.295621	0.00967408	3.85647
Tb11.01.0820	hypothetical protein, conserved	0	0.173982	6.35254e-05	4.02787
Tb927.7.3330	hypothetical protein, conserved	0	0.0319721	8.18959e-14	3.32749
Tb927.4.2750	hypothetical protein, conserved	0	0.169599	0.00128237	4.19712
Tb11.01.2310	hypothetical protein, conserved	0	0.294956	0.0062295	4.23543
Tb927.7.2110	hypothetical protein, conserved	0	0.142627	0.00227646	4.27202
Tb11.01.6380	hypothetical protein, conserved	0	0.269455	0.00560276	4.58184
Tb927.10.15750	hypothetical protein, conserved	0	0.113024	0.00210779	4.95293
Tb927.7.500	hypothetical protein, conserved	0	0.12481	0.00085778	5.02581
Tb927.7.2650	hypothetical protein, conserved	0	0.17753	0.000110254	1
Tb11.52.0008	hypothetical protein, conserved	0	0.0505822	3.85799e-10	5.29135
Tb09.v4.0015	#N/A	0	0.0889769	4.61985e-08	5.29779
Tb927.7.6090	hypothetical protein, conserved	0	0.24695	0.0029547	3.95025
Tb927.3.2050	hypothetical protein, conserved	0	0.270853	0.00805582	3.15301
Tb11.02.3470	formin, putative ,formin-like protein	0	0.212081	0.00210779	7.10448
Tb11.01.0220	hypothetical protein, conserved	0	0.199169	0.00127126	7.54542
Tb927.10.8240	hypothetical protein, conserved	0	0.179517	0.00587287	7.97122
Tb09.211.2060	hypothetical protein	0	0.148975	0.00533384	2.75777
Tb927.5.2710	hypothetical protein, conserved	0	0.21274	0.00591663	9.243
Tb927.2.2340	hypothetical protein, conserved	0	0.19203	0.000938848	9.96549
Tb927.2.650	hypothetical protein	0	0.16674	0.00673009	10.017
Tb927.5.310	hypothetical protein	0	0.212914	0.00486035	3.35596
Tb927.7.7100	hypothetical protein	0	0.150063	0.000206062	14.632
Tb927.7.6790	hypothetical protein, conserved	0	0.21769	0.00165386	14.8075
Tb927.10.12720	hypothetical protein, conserved	0	0.194194	0.00151008	17.6562
Tb927.10.15310	hypothetical protein, conserved	0	0.156573	0.000794284	7.53409
Tb927.6.3830	hypothetical protein, conserved	0	0.112248	0.00126461	18.0232
Tb927.7.2230	hypothetical protein, conserved	0	0.251447	0.00587287	12.05
Tb927.1.1600	hypothetical protein, conserved	0	0.191725	0.000306418	13.0951
Tb927.8.7850	hypothetical protein, conserved	0	0.259116	0.00414131	12.7191
Tb927.2.900	hypothetical protein	0	0.162502	0.00818434	10.4125
Tb927.10.12030	hypothetical protein, conserved	0	0.158833	0.0002926	7.80562
Tb11.01.4460	hypothetical protein, conserved	0	0.250186	0.00806971	19.0376
Tb927.1.1840	hypothetical protein, conserved	0	0.119955	4.79457e-05	13.9441
Tb927.2.1250	hypothetical protein	0	0.165539	0.00542585	11.0385
Tb927.5.3800	glutamine hydrolysing (not ammonia-dependent) carbomoyl phosphate synthase, putative	Amino acid metabolism	0.0677799	3.18411e-10	0.912811
Tb927.4.360	hypothetical protein, conserved	Amino acid metabolism	0.253306	0.00965918	2.82584
Tb927.10.3560	arginine N-methyltransferase, putative	Arginine methylation	0.211571	0.00277142	2.16192
Tb11.01.8460	cyclin 6 ,mitotic cyclin (pers. comm. J. Mottram, Univ. of Glasgow)	Cell cycle	0.133496	5.75194e-05	2.98711
Tb927.7.5790	protein disulfide isomerase, putative	Chaperone	0.13855	0.000140571	1
Tb927.7.710	heat shock 70 kDa protein, putative	Chaperone	0.275144	0.00541908	1.70013
Tb09.211.2970	structural maintenance of chromosome 1, putative	Chromatin	0.242507	0.00307028	1.51172
Tb927.10.740	structural maintenance of chromosome 4, putative	Chromatin	0.120677	1.57801e-05	3.07837
Tb927.10.15350	histone H3 variant	Chromatin	0.157044	0.00200395	5.40627
Tb09.160.4240	nucleosome assembly protein-like protein	Chromatin	0.213706	0.00690968	7.88159
Tb11.02.0290	succinyl-coA:3-ketoacid-coenzyme A transferase, mitochondrial precursor, putative	Citric acid cycle	0.215422	0.00108126	1
Tb927.10.3650	NADH-dependent fumarate reductase, putative	Citric acid cycle	0.231722	0.000949567	5.46276
Tb927.10.1170	intraflagellar transport protein IFT172, putative	Cytoskeleton	0.312132	0.0065381	0.765261
Tb11.02.0030	dynein heavy chain, putative	Cytoskeleton	0.221429	0.000394812	0.841577
Tb11.01.3010	dynein heavy chain, putative	Cytoskeleton	0.288981	0.00386028	0.95301
Tb927.4.870	dynein heavy chain, putative	Cytoskeleton	0.191285	0.000118627	1.0476
Tb09.244.2560	kinesin, putative	Cytoskeleton	0.2038	0.000597794	1.07959
Tb927.4.2080	hypothetical protein, conserved	Cytoskeleton	0.158731	0.000176721	1.21887
Tb927.10.5350	dynein heavy chain, putative	Cytoskeleton	0.184351	0.000195932	1.31365
Tb927.2.4330	PFR5	Cytoskeleton	0.205008	0.00223327	1.35477
Tb927.3.930	dynein heavy chain, putative	Cytoskeleton	0.184948	9.1417e-05	1.38397
Tb11.02.0760	dynein heavy chain, putative	Cytoskeleton	0.159268	0.00118406	1.43242
Tb927.10.9570	paraflagellar rod component, putative	Cytoskeleton	0.130442	0.00333921	1.52724
Tb927.10.15400	kinesin, putative	Cytoskeleton	0.243507	0.00272677	1.68422
Tb927.4.3950	cytoskeleton-associated protein CAP5.5, putative ,cysteine peptidase, Clan CA, family C2, putative	Cytoskeleton	0.167349	6.12331e-05	1.74968
Tb927.8.6070	basal body component ,ML protein	Cytoskeleton	0.159893	9.00492e-05	1.92875
Tb927.7.920	dynein heavy chain, putative	Cytoskeleton	0.216346	0.000682054	1.97564
Tb927.3.5310	paraflagellar rod protein ,I2 antigen	Cytoskeleton	0.0472643	0.00112741	1.98077
Tb11.02.0090	kinesin, putative ,Unc104-like kinesin, putative	Cytoskeleton	0.192045	0.000331922	2.10328
Tb927.1.1350	kinesin heavy chain, putative	Cytoskeleton	0.255291	0.00716924	2.3749
Tb927.4.3740	flagellar attachment zone protein	Cytoskeleton	0.121999	6.29626e-06	2.8965
Tb11.01.6740	Tb5.20	Cytoskeleton	0.159396	0.000110254	3.50935
Tb927.3.2040	kinesin, putative	Cytoskeleton	0.224279	0.00200395	4.46332
Tb927.10.890	kinesin, putative	Cytoskeleton	0.0351122	8.86432e-13	5.38602
Tb927.7.3830	kinesin K39, putative	Cytoskeleton	0.0336272	0.000116304	6.87919
Tb927.2.950	paraflagellar rod component, putative	Cytoskeleton	0.0913039	0.000969764	8.63573
Tb927.8.4950	kinesin, putative	Cytoskeleton	0.0644581	7.65112e-10	13.3311
Tb927.7.610	DNA ligase, putative ,mitochondrial DNA ligase homolog, putative	DNA synthesis, modification, repair	0.229387	0.00205752	1.56046
Tb11.01.0340	RAD50 DNA repair-like protein	DNA synthesis, modification, repair	0.0909118	1.7095e-07	2.27083
Tb09.211.1820	DNA polymerase epsilon catalytic subunit, putative	DNA synthesis, modification, repair	0.272489	0.0043969	3.20638
Tb927.4.1330	DNA topoisomerase IB, large subunit	DNA synthesis, modification, repair	0.251023	0.00372745	3.57024
Tb927.10.5670	N-acetyltransferase subunit Nat1, putative	Enzyme	0.21328	0.00161651	1.24811
Tb927.7.580	GTP-binding protein, putative	Enzyme	0.232756	0.0061114	1.75376
Tb927.6.2850	ESAG8-associated protein, putative	ESAG	0.0954756	3.00857e-05	1.07589
Tb927.7.170	expression site-associated gene (ESAG) protein, putative ,expression site-associated gene 9 (ESAG9) protein, putative	ESAG	0.14699	0.000426211	3.68357
Tb11.03.0990	expression site-associated gene 4 (ESAG4) protein, putative ,receptor-type adenylate cyclase	ESAG	0.22687	0.00542585	10.7251
Tb11.01.6240	expression site-associated gene (ESAG) protein, putative ,expression site-associated gene 2 (ESAG2) protein, putative	ESAG	0.129719	0.000206062	12.5653
Tb927.3.5790	expression site-associated gene (ESAG, pseudogene), putative ,expression site-associated gene 9 (ESAG9), point mutation	ESAG pseudogene	0.169172	0.00395019	5.18659
Tb11.01.6410	phosphomannose isomerase, putative	Glucose & glycerol	0.222428	0.00357493	2.19489
Tb927.4.4430	adenylyl cyclase	GRESAG	0.167286	0.000105852	2.42195
Tb927.4.4420	adenylyl cyclase, pseudogene, putative ,adenylyl cyclase, frameshift	GRESAG	0.149834	3.19549e-05	2.48817
Tb927.4.4410	adenylyl cyclase	GRESAG	0.164877	9.4976e-05	2.56162
Tb927.4.4450	adenylyl cyclase	GRESAG	0.157312	5.77407e-05	2.7441
Tb927.4.4460	adenylyl cyclase	GRESAG	0.160053	8.07333e-05	2.78477
Tb927.4.4440	adenylyl cyclase	GRESAG	0.152231	4.68914e-05	2.90496
Tb927.4.4470	adenylyl cyclase	GRESAG	0.155088	5.3887e-05	3.26321
Tb927.6.100	receptor-type adenylate cyclase GRESAG 4, pseudogene, putative ,receptor-type adenylate cyclase GRESAG 4, degenerate	GRESAG	0.265934	0.00815503	3.44911
Tb927.7.7530	receptor-type adenylate cyclase GRESAG 4, putative	GRESAG	0.185587	0.000302902	3.91643
Tb927.7.7520	receptor-type adenylate cyclase GRESAG 4, putative	GRESAG	0.185762	0.000315798	4.20551
Tb09.244.2570	calcium motive p-type ATPase, putative	Ion channel or pump	0.202203	0.000204466	0.615936
Tb927.6.3550	phospholipid-translocating P-type ATPase (flippase), putative	Lipids & fatty acids	0.170536	0.000851803	2.48926
Tb11.02.2850	hypothetical protein, conserved ,leucine-rich repeat protein (LRRP), putative	LRRP	0.273778	0.00421969	1.68023
Tb927.1.290	leucine-rich repeat protein (LRRP), putative	LRRP	0.0762393	4.80609e-05	8.72922
Tb09.211.4960	leucine-rich repeat protein (LRRP, pseudogene), putative ,leucine-rich repeat protein (LRRP), point mutation	LRRP	0.119179	0.00678681	8.79
Tb927.4.160	leucine-rich repeat protein (LRRP, pseudogene), putative ,leucine-rich repeat protein 1 (LRRP1), frameshift	LRRP	0.0737639	7.31969e-05	9.28609
Tb927.1.480	leucine-rich repeat protein (LRRP), putative	LRRP	0.0813971	0.00460984	9.77004
Tb927.2.1310	leucine-rich repeat protein (LRRP, pseudogene), putative ,leucine-rich repeat protein (LRRP), frameshift	LRRP	0.0718621	0.000592279	9.7747
Tb927.6.130	leucine-rich repeat protein (LRRP, pseudogene), putative ,leucine-rich repeat protein 1 (LRRP1), frameshift	LRRP	0.0658053	5.3887e-05	9.88635
Tb927.1.370	leucine-rich repeat protein (LRRP), putative	LRRP	0.0885343	0.00542204	9.9014
Tb927.2.170	leucine-rich repeat protein (LRRP), putative ,leucine-rich repeat protein 1 (LRRP1), putative	LRRP	0.0858261	0.00200395	10.5584
Tb927.2.690	leucine-rich repeat protein (LRRP), putative ,leucine-rich repeat protein 1 (LRRP1), putative	LRRP	0.0590755	0.00214129	10.6412
Tb09.v2.0010	invariant surface glycoprotein 100 (pseudogene), putative ,invariant surface glycoprotein 100, point mutation	Membrane	0.0343908	1.69793e-13	1.55509
Tb927.8.1640	MSP-B, putative	Membrane	0.287948	0.00464943	1.58919
Tb927.8.1620	MSP-B, putative	Membrane	0.287783	0.00430561	1.75617
Tb927.8.1630	MSP-B, putative	Membrane	0.287783	0.00430561	1.75617
Tb927.8.1610	MSP-B, putative	Membrane	0.297308	0.00570052	2.04845
Tb11.01.7130	Tb-291 membrane associated protein, putative ,membrane associated protein, putative	Membrane	0.0749844	8.15164e-09	2.1057
Tb927.5.1390	64 kDa invariant surface glycoprotein	Membrane	0.152178	0.000284466	2.2591
Tb927.5.1410	64 kDa invariant surface glycoprotein	Membrane	0.176926	0.000552687	4.04929
Tb927.6.3800	heat shock 70 kDa protein, mitochondrial precursor, putative	Mitochondrial biogenesis	0.308794	0.00824018	3.07597
Tb927.6.3740	heat shock 70 kDa protein, mitochondrial precursor, putative	Mitochondrial biogenesis	0.310204	0.00845242	3.14498
Tb11.02.4730	DNA repair and recombination helicase protein PIF1, putative ,DNA repair and recombination protein, mitochondrial precursor, putative	Mitochondrial DNA	0.125787	5.16742e-06	1.31001
Tb09.160.4090	DNA topoisomerase ii	Mitochondrial DNA	0.265861	0.00357493	1.95473
Tb927.8.3560	DNA repair and recombination helicase	Mitochondrial DNA	0.305802	0.00847197	7.90852
Tb927.10.9720	RNA-editing-associated protein 1 ,RNA-binding protein ,oligo (U) binding protein ,RNA editing complex protein	Mitochondrial RNA	0.227094	0.00348768	1.87625
Tb11.02.2710	hypothetical protein, conserved	Mitochondrial translation	0.260243	0.00270511	1.81669
Tb927.10.5010	Mitochondrial elongation factor G, putative	Mitochondrial translation	0.159524	0.000198709	2.96632
Tb927.2.4230	NUP-1 protein, putative	Nucleo-cytoplasmic transport	0.0436782	4.05181e-12	4.82761
Tb09.160.0340	Nucleoporin	Nucleo-cytoplasmic transport	0.233906	0.00214129	6.44965
Tb927.10.2900	importin beta-1 subunit, putative	Nucleo-cytoplasmic transport	0.25525	0.00481772	12.1917
Tb927.10.1390	hypoxanthine-guanine phosphoribosyltransferase, putative	Nucleotides-Purines	0.17017	0.00369597	2.54536
Tb927.1.1240	cytidine triphosphate synthase, putative	Nucleotides-Pyrimidines	0.255933	0.00587287	0.414912
Tb927.5.3810	orotidine-5-phosphate decarboxylase/orotate phosphoribosyltransferase, putative ,OMPDCase-OPRTase, putative	Nucleotides-Pyrimidines	0.161628	0.000176721	3.84302
Tb927.10.880	thymidine kinase, putative	Nucleotides-Pyrimidines	0.251544	0.0062295	6.54262
Tb927.7.7160	kinetoplastid-specific dual specificity phosphatase, putative	Phosphatase	0.255207	0.00769314	1.41045
Tb927.8.8330	calpain, putative ,cysteine peptidase, putative	Protease or peptidase	0.220994	0.000331922	0.805034
Tb09.160.5550	calpain-like cysteine peptidase, putative ,cysteine peptidase, Clan CA, family C2, putative	Protease or peptidase	0.286567	0.0089656	1.57674
Tb11.47.0036	calpain, putative ,cysteine peptidase, Clan CA, family C2, putative	Protease or peptidase	0.0472228	1.54585e-11	1.67095
Tb11.47.0035	calpain-like cysteine peptidase, putative ,antigen, putative ,cysteine peptidase, Clan CA, family C2, putative	Protease or peptidase	0.244924	0.00896261	1.87591
Tb927.3.4230	subtilisin-like serine peptidase ,serine peptidase, clan SB, family S8-like protein	Protease or peptidase	0.307911	0.00602821	3.38415
Tb11.57.0008	calpain-like protein, putative ,cytoskeleton assocociated protein, putative	Protease or peptidase	0.0439296	4.17783e-12	3.3164
Tb927.5.790	casein kinase I isoform 1	Protein kinase	0.141127	0.000169355	0.339413
Tb11.02.2210	protein kinase A regulatory subunit	Protein kinase	0.113488	7.2817e-05	0.504867
Tb927.7.6310	polo-like protein kinase ,protein kinase	Protein kinase	0.23891	0.00533384	0.547477
Tb927.5.800	casein kinase I, isoform 2	Protein kinase	0.101832	1.17177e-05	0.876414
Tb927.8.870	serine/threonine kinase, putative ,protein kinase, putative	Protein kinase	0.136744	0.000243858	1.34499
Tb927.2.1820	protein kinase, putative	Protein kinase	0.277693	0.00824018	2.11638
Tb927.10.15300	protein kinase, putative	Protein kinase	0.196291	0.00020118	2.24187
Tb09.211.3410	protein kinase, putative	Protein kinase	0.132149	2.6807e-05	2.39297
Tb927.1.1530	protein kinase, putative	Protein kinase	0.246327	0.00565723	2.77084
Tb927.4.5310	serine/threonine-protein kinase a, putative ,protein kinase, putative	Protein kinase	0.172753	0.000405311	6.39773
Tb927.7.6680	protein kinase, putative	Protein kinase	0.213131	0.00587287	10.2193
Tb11.52.0006	hypothetical protein, conserved (pseudogene)	pseudogene	0.147398	5.51673e-05	2.07876
Tb927.7.1970	retrotransposon hot spot (RHS) protein, putative ,retrotransposon hot spot protein 7 (RHS7), putative	RHS	0.152683	0.00357493	2.36215
Tb927.7.1950	retrotransposon hot spot (RHS) protein, putative ,retrotransposon hot spot protein 7 (RHS7), putative	RHS	0.143316	0.00210779	2.82805
Tb927.7.1980	retrotransposon hot spot (RHS) protein, putative ,retrotransposon hot spot protein 7 (RHS7), putative	RHS	0.16447	0.00587287	3.03548
Tb927.7.1960	retrotransposon hot spot (RHS) protein, putative ,retrotransposon hot spot protein 7 (RHS7), putative	RHS	0.158843	0.00389814	3.11814
Tb927.6.150	retrotransposon hot spot protein (RHS, pseudogene), putative ,retrotransposon hot spot protein 3 (RHS3), frameshift	RHS	0.17203	0.00408434	3.54438
Tb927.7.2000	retrotransposon hot spot (RHS) protein, putative ,retrotransposon hot spot protein 7 (RHS7), putative	RHS	0.144743	0.00231111	4.4842
Tb927.1.70	retrotransposon hot spot (RHS) protein, putative ,retrotransposon hot spot protein 4 (RHS4), putative	RHS	0.198687	0.00493106	4.49481
Tb927.7.2010	retrotransposon hot spot (RHS) protein, putative ,retrotransposon hot spot protein 7 (RHS7), putative	RHS	0.14279	0.00161672	4.60017
Tb927.6.140	retrotransposon hot spot (RHS) protein, putative ,retrotransposon hot spot protein 5 (RHS5), putative	RHS	0.17027	0.000731857	5.38266
Tb927.7.2020	retrotransposon hot spot (RHS) protein, putative ,retrotransposon hot spot protein 7 (RHS7), putative	RHS	0.122208	0.000671812	5.54627
Tb927.2.1080	retrotransposon hot spot (RHS) protein, putative ,retrotransposon hot spot protein 5 (RHS5), putative	RHS	0.203963	0.00123423	6.2383
Tb927.1.420	retrotransposon hot spot (RHS) protein, putative ,retrotransposon hot spot protein 5 (RHS5), putative	RHS	0.21703	0.00253019	6.23927
Tb927.7.2030	retrotransposon hot spot (RHS) protein, putative ,retrotransposon hot spot protein 7 (RHS7), putative	RHS	0.194487	0.00897316	7.0596
Tb927.4.250	retrotransposon hot spot (RHS) protein, putative ,retrotransposon hot spot protein 5 (RHS5), putative	RHS	0.204885	0.00432982	7.20856
Tb927.6.160	retrotransposon hot spot (RHS) protein, putative ,retrotransposon hot spot protein 1 (RHS1), putative	RHS	0.135561	0.000342987	9.32418
Tb927.2.240	retrotransposon hot spot (RHS) protein, putative ,retrotransposon hot spot protein 5 (RHS5), putative	RHS	0.185818	0.000768414	12.44
Tb927.2.1170	retrotransposon hot spot (RHS) protein, putative ,retrotransposon hot spot protein 5 (RHS5), putative	RHS	0.211171	0.00164402	12.6827
Tb927.6.3480	RNA-binding protein, putative	RNA binding	0.122106	8.07333e-05	0.10531
Tb927.8.710	RNA-binding protein, putative	RNA binding	0.0980279	0.00279172	0.155455
Tb11.01.5690	DRBD4	RNA binding	0.235044	0.00235167	0.35283
Tb09.211.3370	RNA-binding protein, putative	RNA binding	0.212454	0.00250504	0.673029
Tb927.5.810	hypothetical protein, conserved ,zinc finger protein family member, putative	RNA binding	0.299153	0.00533384	1
Tb10.v4.0033	#N/A	RNA binding	0.124533	1.37269e-06	1.46104
Tb927.6.820	pumilio RNA binding protein, putative	RNA binding	0.223507	0.000791744	1.48912
Tb11.46.0009	hypothetical protein, conserved ,zinc finger protein family member, putative	RNA binding	0.210135	0.000592279	1.53137
Tb11.01.3940	RNA-binding protein, putative	RNA binding	0.15694	0.000938848	1.56871
Tb09.160.3150	RBP32	RNA binding	0.219523	0.000851803	2.09989
Tb927.10.4430	pumillo RNA binding protein PUF1	RNA binding	0.194966	0.000346085	2.14459
Tb927.7.2140	hypothetical protein ,zinc finger protein family member, putative	RNA binding	0.205973	0.00253019	2.34598
Tb927.8.4450	RNA-binding protein, putative	RNA binding	0.230762	0.00406177	3.82349
Tb927.8.6440	RNA-binding protein, putative	RNA binding	0.166111	0.000637944	4.18633
Tb927.3.3970	RNA binding protein, putative	RNA binding	0.229249	0.00740125	11.2787
Tb927.3.3940	RNA-binding protein, putative	RNA binding	0.0948999	0.00124091	3.74586
Tb927.7.4900	5'-3' exonuclease XRNA, putative ,exoribonuclease 1, putative	RNA degradation	0.25901	0.00198905	1.64694
Tb927.8.2370	dicer-like protein	RNA degradation	0.252516	0.00227646	1.65262
Tb927.10.6630	ATP-dependent DEAD/H RNA helicase HEL64, putative	RNA helicase	0.18661	0.00068627	3.53113
Tb09.211.2420	PRP8 protein homologue ,U5 snRNA-associated splicing factor	RNA processing	0.290375	0.00711839	3.26293
Tb927.2.3580	transcription elongation factor s-II, putative	RNA synthesis II	0.2405	0.00958022	1.73411
Tb927.5.4420	nucleolar RNA helicase II, putative ,nucleolar RNA helicase Gu, putative	rRNA-tRNA processing	0.227374	0.00102777	1.20823
Tb927.8.730	nucleolar RNA-binding protein, putative	rRNA-tRNA processing	0.253995	0.00620611	1.70656
Tb927.3.2470	pumilio RNA binding protein, putative	rRNA-tRNA processing	0.227728	0.00772082	2.21303
Tb927.8.3750	nucleolar protein, putative	rRNA-tRNA processing	0.272434	0.00679022	6.39882
Tb927.1.2190	hypothetical protein, conserved	Signalling	0.317559	0.0044549	1.40811
Tb927.4.420	phosphatidylinositol 3-kinase (tor2)	Signalling	0.305447	0.00852623	2.94887
Tb11.02.4700	14-3-3 protein	Signalling	0.0948708	6.79493e-07	4.14583
Tb927.10.4570	elongation factor 2	Translation	0.278359	0.00395019	0.479765
Tb927.10.4560	elongation factor 2	Translation	0.278407	0.00350459	0.487614
Tb09.211.2380	hypothetical protein, conserved	Translation	0.212603	0.000440052	0.617302
Tb11.22.0012	eukaryotic peptide chain release factor subunit 1, putative	Translation	0.262606	0.00622581	1.47461
Tb927.10.8270	eukaryotic translation initiation factor 3 subunit 8, putative	Translation	0.273678	0.0044016	1.91021
Tb927.10.8290	eukaryotic translation initiation factor 3 subunit 8, putative	Translation	0.273587	0.00439354	1.91795
Tb927.10.1060	T-complex protein 1, delta subunit, putative	Translation	0.241475	0.00328334	2.4282
Tb11.01.2330	eukaryotic translation initation factor 4 gamma, putative	Translation	0.196985	0.000431909	7.33829
Tb927.4.2310	asparaginyl-tRNA synthetase, putative	Translation tRNA	0.201811	0.000306418	1.3901
Tb927.6.4480	valyl-tRNA synthetase, putative	Translation tRNA	0.341357	0.0093802	1.54338
Tb927.10.9190	isoleucyl-tRNA synthetase, putative	Translation tRNA	0.286167	0.00247081	2.59353
Tb927.6.4590	glutamyl-tRNA synthetase, putative	Translation tRNA	0.245089	0.00845242	3.34395
Tb09.160.4600	ABC transporter, putative	Transporter	0.23874	0.00208271	2.30962
Tb927.10.15530	ABC transporter, putative	Transporter	0.267842	0.00369619	3.40719
Tb11.01.1680	polyubiquitin, putative	Ubiquitin & proteasome	0.153386	1.22788e-05	1
Tb09.211.4210	ubiquitin-protein ligase, putative	Ubiquitin & proteasome	0.297287	0.00896261	1.7291
Tb11.02.0815	ubiquitin-conjugating enzyme, putative ,ubiquitin-conjugating enzyme-like protein, putative	Ubiquitin & proteasome	0.106449	4.33292e-05	1.95814
Tb09.211.4270	ubiquitin carboxyl-terminal hydrolase, putative ,cysteine peptidase, Clan CA, family C19, putative	Ubiquitin & proteasome	0.24319	0.00270511	2.23414
Tb927.4.3790	ubiquitin carboxyl-terminal hydrolase, putative ,cysteine peptidase, Clan CA, family C19, putative	Ubiquitin & proteasome	0.22897	0.00384368	4.25926
Tb09.211.4970	hypothetical protein, unlikely	unlikely	0.170063	0.00716599	1.2434
Tb927.1.260	hypothetical protein, unlikely	unlikely	0.114804	0.000116304	9.9908
Tb09.211.1550	chaperone protein DNAj, putative	Vesicular transport	0.239794	0.00269619	3.60344
Tb927.8.4330	small GTP-binding protein Rab11 ,Rab11A GTPase	Vesicular transport	0.210793	0.000824896	5.0846
Tb927.3.1520	variant surface glycoprotein (VSG)-related, putative	VSG	0.0909023	2.55038e-06	0.683751
Tb927.3.1470	variant surface glycoprotein (VSG)-related, putative	VSG	0.0915158	2.65797e-06	0.694946

## Sheet: CAF1 up
gene	Description	Class	foldChange (CAF1/WT)	padj	HL change (CAF1/WT)
Tb927.10.10780	hypothetical protein, conserved	0	2.85625	0.00179465	22.854
Tb927.6.4250	hypothetical protein, conserved	0	3.79967	8.30949e-06	21.3073
Tb927.7.6560	hypothetical protein, conserved	0	3.25238	0.0023557	20.9884
Tb11.12.0017	hypothetical protein	0	2.74848	0.00137941	17.96
Tb927.7.4740	hypothetical protein, conserved	0	2.58419	0.0068867	17.6096
Tb927.8.4910	hypothetical protein, conserved	0	2.72741	0.00218024	16.8187
Tb927.7.4870	hypothetical protein, conserved	0	5.4721	3.69715e-05	14.3443
Tb927.2.5500	hypothetical protein, conserved	0	3.98817	6.27819e-06	13.4269
Tb927.2.5630	hypothetical protein, conserved	0	3.98817	6.27819e-06	13.4269
Tb927.3.2220	hypothetical protein, conserved	0	2.86956	0.000725168	12.2951
Tb11.01.1620	hypothetical protein, conserved	0	5.06534	2.32702e-05	11.6158
Tb927.2.4530	hypothetical protein, conserved	0	4.00695	2.20429e-05	11.4974
Tb927.10.7820	hypothetical protein, conserved	0	2.76983	0.00195965	11.053
Tb09.160.1030	hypothetical protein, conserved	0	4.23271	0.000657448	10.6267
Tb927.7.4010	hypothetical protein, conserved	0	4.67452	6.03929e-06	10.5739
Tb11.02.2490	hypothetical protein, conserved	0	5.60124	0.00124847	10.4713
Tb927.6.2220	hypothetical protein, conserved	0	3.35677	0.00054362	9.57073
Tb927.10.11330	hypothetical protein, conserved	0	3.33625	8.23699e-05	9.55403
Tb927.7.6440	hypothetical protein, conserved	0	2.41142	0.00673909	9.47365
Tb927.10.11420	hypothetical protein, conserved	0	2.73271	0.00182419	9.44183
Tb927.7.4580	hypothetical protein, conserved	0	2.95598	0.00903592	9.29114
Tb927.10.1430	hypothetical protein, conserved	0	2.46879	0.00433571	9.22498
Tb927.7.1290	hypothetical protein, conserved	0	2.73199	0.000995766	9.22026
Tb927.10.1810	hypothetical protein, conserved	0	4.49309	1.02414e-06	9.05023
Tb927.5.2200	hypothetical protein, conserved	0	2.67175	0.00301161	8.90469
Tb927.5.2230	hypothetical protein, conserved	0	2.67175	0.00301161	8.90469
Tb927.10.13390	hypothetical protein, conserved	0	3.10691	0.000405958	8.87968
Tb927.10.10720	hypothetical protein, conserved	0	3.78974	9.68204e-06	8.87866
Tb11.02.4535	hypothetical protein, conserved	0	3.84082	7.96406e-05	8.83932
Tb927.4.2240	hypothetical protein, conserved	0	3.26247	0.000108349	8.77486
Tb927.4.3480	hypothetical protein	0	3.2781	0.000101642	8.7143
Tb09.160.2370	hypothetical protein, conserved	0	2.27486	0.00686383	8.70728
Tb927.10.13690	hypothetical protein, conserved	0	3.07528	0.0001532	8.43351
Tb09.211.4820	hypothetical protein, conserved	0	2.58813	0.00641818	8.16714
Tb11.52.0013	hypothetical protein, conserved	0	2.30308	0.00836522	8.07609
Tb927.8.8150	hypothetical protein, conserved	0	2.52963	0.00758409	8.05559
Tb09.244.2850	hypothetical protein, conserved	0	2.53308	0.00419997	7.67876
Tb927.10.13140	hypothetical protein, conserved	0	4.43791	0.00107771	7.63191
Tb927.10.7720	hypothetical protein, conserved	0	4.65882	7.19887e-05	7.39287
Tb927.6.2200	hypothetical protein, conserved	0	2.81845	0.000896104	7.32771
Tb927.5.2170	hypothetical protein, conserved	0	2.81718	0.00134982	7.18957
Tb11.01.5440	hypothetical protein, conserved	0	4.13284	4.81113e-05	6.91657
Tb927.10.10000	hypothetical protein, conserved	0	4.67361	1.77129e-06	6.89882
Tb11.02.4310	hypothetical protein, conserved	0	3.42194	3.90225e-05	6.42543
Tb927.10.6490	hypothetical protein, conserved	0	2.4202	0.00799407	6.19168
Tb927.8.1230	hypothetical protein, conserved	0	2.37215	0.00972181	6.15763
Tb09.211.4630	hypothetical protein, conserved	0	3.42465	0.000574893	5.91903
Tb09.211.2190	hypothetical protein, conserved	0	3.34705	0.000185664	5.6841
Tb927.8.3470	hypothetical protein, conserved	0	2.46111	0.00475723	5.37987
Tb927.5.2550	hypothetical protein, conserved	0	3.57995	0.000177603	5.37882
Tb11.01.0130	hypothetical protein, conserved	0	2.67039	0.00317229	5.2716
Tb09.244.2860	hypothetical protein, conserved	0	2.52676	0.00926561	5.21784
Tb927.10.13790	hypothetical protein, conserved	0	2.52988	0.00589028	4.91261
Tb927.10.11030	hypothetical protein, conserved	0	2.97774	0.00146876	4.83046
Tb11.02.5105	hypothetical protein, conserved	0	4.1031	1.40344e-05	4.81691
Tb927.5.2260	hypothetical protein, conserved	0	3.25354	0.000792287	4.64282
Tb11.02.2470	hypothetical protein, conserved	0	2.76743	0.000717797	4.58628
Tb927.8.6990	hypothetical protein, conserved	0	3.87555	0.00348433	4.5791
Tb09.160.5100	hypothetical protein, conserved	0	3.00913	0.000561384	4.56439
Tb09.211.0485	hypothetical protein, conserved	0	2.55305	0.00311814	4.51254
Tb927.10.12410	hypothetical protein, conserved	0	2.4925	0.00348472	4.50156
Tb927.5.4050	hypothetical protein, conserved	0	4.85678	1.67785e-06	4.44725
Tb11.01.0590	hypothetical protein, conserved	0	4.42264	6.38496e-06	4.43441
Tb11.02.3830	hypothetical protein, conserved	0	3.70728	0.000313605	4.4075
Tb927.7.3810	hypothetical protein, conserved	0	2.38688	0.00975913	4.37765
Tb11.01.6860	hypothetical protein, conserved	0	2.44571	0.00619054	4.34822
Tb09.211.0600	hypothetical protein, conserved	0	2.54099	0.00242272	4.32319
Tb927.5.2160	hypothetical protein, conserved	0	3.41224	0.00182558	4.28205
Tb927.5.4510	hypothetical protein, conserved	0	3.45537	0.0025427	4.14699
Tb11.12.0008	hypothetical protein, conserved	0	3.54362	8.77455e-05	4.1349
Tb09.211.0440	hypothetical protein, conserved	0	3.75821	5.30676e-05	3.89178
Tb09.160.1100	hypothetical protein, conserved	0	2.98006	0.000561384	3.80859
Tb927.8.5070	hypothetical protein, conserved	0	2.76672	0.00245512	3.79298
Tb11.01.8775	hypothetical protein, conserved	0	2.62717	0.00263921	3.78473
Tb927.3.2420	hypothetical protein, conserved	0	2.54722	0.00317949	3.77785
Tb927.8.7270	hypothetical protein, conserved	0	2.69837	0.00119935	3.70967
Tb927.4.5080	hypothetical protein, conserved	0	4.16945	2.91452e-05	3.58997
Tb927.6.1240	hypothetical protein, conserved	0	3.37223	0.00123572	3.56201
Tb927.5.2910	hypothetical protein, conserved	0	2.83704	0.00230229	3.55222
Tb927.10.12390	hypothetical protein, conserved	0	3.77588	2.27928e-05	3.53804
Tb927.10.8700	selenoprotein, putative	0	3.00504	0.00117575	3.53206
Tb927.10.4810	hypothetical protein, conserved	0	4.24726	2.20429e-05	3.51485
Tb11.01.1980	hypothetical protein, conserved	0	2.71978	0.00728536	3.42594
Tb927.8.2800	hypothetical protein, conserved	0	2.57197	0.00469865	3.34698
Tb927.8.6920	hypothetical protein, conserved	0	2.99206	0.000966049	3.28291
Tb927.8.2300	hypothetical protein, conserved	0	3.59539	0.000316064	3.27519
Tb09.160.0740	hypothetical protein, conserved	0	3.08751	0.00157066	3.26356
Tb927.8.7030	hypothetical protein, conserved	0	5.06691	7.41637e-08	3.20338
Tb927.10.8650	hypothetical protein, conserved	0	2.73744	0.00121374	3.15767
Tb927.3.4080	hypothetical protein, conserved	0	3.24822	0.000275185	3.10322
Tb927.3.4090	hypothetical protein, conserved	0	3.29245	0.000317085	3.09597
Tb927.2.2390	hypothetical protein, conserved	0	2.49823	0.00935804	3.02062
Tb11.01.2460	hypothetical protein, conserved	0	2.82742	0.00130236	2.99816
Tb927.3.2670	hypothetical protein, conserved	0	3.23569	0.000852963	2.98986
Tb11.57.0001	hypothetical protein, conserved	0	3.25678	0.00056382	2.95103
Tb927.1.3810	hypothetical protein, conserved	0	4.63761	6.4352e-06	2.93855
Tb927.6.570	hypothetical protein, conserved	0	3.60932	0.00010135	2.93493
Tb927.6.4240	hypothetical protein, conserved	0	3.20301	0.000265107	2.9263
Tb927.3.4110	hypothetical protein, conserved	0	2.67613	0.00121374	2.90477
Tb927.3.3790	hypothetical protein, conserved	0	2.72723	0.00114584	2.90226
Tb927.8.4680	hypothetical protein, conserved	0	3.35041	0.000122458	2.83053
Tb927.10.4240	hypothetical protein, conserved	0	4.20061	8.52473e-05	2.82669
Tb11.01.6835	hypothetical protein, conserved	0	2.57074	0.00805183	2.81769
Tb927.10.14740	hypothetical protein, conserved	0	4.34315	3.78589e-05	2.78054
Tb927.10.9510	hypothetical protein	0	4.11112	6.87562e-06	2.75797
Tb927.4.1740	hypothetical protein, conserved	0	2.34516	0.00900221	2.74085
Tb927.10.14620	hypothetical protein, conserved	0	4.41151	1.99849e-05	2.71973
Tb927.1.3390	hypothetical protein, conserved	0	4.47169	0.00252105	2.665
Tb927.7.2950	hypothetical protein, conserved	0	3.4202	9.17121e-05	2.64464
Tb927.7.4440	hypothetical protein, conserved	0	2.78483	0.00163182	2.63856
Tb11.01.5070	hypothetical protein, conserved	0	3.34276	0.000146574	2.6119
Tb11.01.5355	hypothetical protein, conserved	0	2.95979	0.00163572	2.61053
Tb11.57.0002	hypothetical protein, conserved	0	4.95865	0.000261682	2.49098
Tb927.7.1010	hypothetical protein, conserved	0	4.98326	2.79531e-06	2.47558
Tb09.160.2060	hypothetical protein, conserved	0	3.61675	0.000399512	2.46191
Tb927.5.4150	hypothetical protein, conserved	0	2.51444	0.00415761	2.4447
Tb11.02.4940	hypothetical protein, conserved	0	3.36071	0.000101642	2.43132
Tb927.8.7280	hypothetical protein, conserved	0	3.00493	0.00463073	2.39264
Tb927.8.5830	hypothetical protein, conserved	0	3.22331	0.000581526	2.3924
Tb11.55.0011	hypothetical protein, conserved	0	3.08339	0.00107911	2.38888
Tb09.211.1300	hypothetical protein, conserved	0	4.33537	9.41235e-07	2.34524
Tb11.03.0470	hypothetical protein, conserved	0	3.19044	0.000338712	2.25492
Tb927.3.1260	hypothetical protein, conserved	0	3.03494	0.000790181	2.25201
Tb11.01.6870	hypothetical protein, conserved	0	3.06089	0.000508112	2.23302
Tb11.01.1380	hypothetical protein, conserved	0	3.21964	0.00024962	2.15869
Tb927.6.2260	hypothetical protein, conserved	0	2.74109	0.00112756	2.15645
Tb927.6.2320	hypothetical protein, conserved	0	2.74109	0.00112756	2.15645
Tb927.3.2350	hypothetical protein, conserved	0	4.34637	2.52534e-05	2.15408
Tb09.160.2890	hypothetical protein, conserved	0	3.85816	2.66455e-05	2.14997
Tb927.6.1830	hypothetical protein, conserved	0	2.63705	0.00338797	2.13539
Tb927.5.4020	hypothetical protein	0	5.56887	2.20429e-05	2.07432
Tb927.3.4100	hypothetical protein, conserved	0	3.44525	0.000537814	2.0682
Tb09.211.2620	hypothetical protein, conserved	0	5.5163	8.33622e-08	2.05958
Tb927.10.12460	hypothetical protein, conserved	0	4.65927	3.27023e-06	2.05777
Tb927.10.1770	hypothetical protein	0	3.32608	0.0037931	2.05696
Tb09.211.0460	hypothetical protein, conserved	0	2.79915	0.00126203	2.053
Tb927.3.1150	hypothetical protein, conserved	0	4.15105	5.59962e-06	2.04427
Tb927.10.15140	hypothetical protein, conserved	0	3.66629	4.08644e-05	2.0314
Tb927.2.3340	hypothetical protein	0	3.41718	0.000311754	2.02409
Tb927.10.3830	hypothetical protein	0	2.22461	0.00703187	1.99528
Tb927.7.7140	hypothetical protein, conserved	0	2.78916	0.00234988	1.97636
Tb927.7.1820	hypothetical protein, conserved	0	3.88005	5.74371e-06	1.95682
Tb927.7.1860	hypothetical protein, conserved	0	3.88005	5.74371e-06	1.95682
Tb927.7.4680	hypothetical protein, conserved	0	5.18191	9.64921e-07	1.9552
Tb09.211.2810	hypothetical protein, conserved	0	3.53718	0.000252843	1.95306
Tb11.01.7070	hypothetical protein, conserved	0	2.33953	0.00685276	1.94085
Tb927.7.2740	hypothetical protein, conserved	0	3.88699	6.01975e-05	1.93411
Tb927.7.5010	hypothetical protein, conserved	0	3.30532	0.000228863	1.92709
Tb927.1.690	hypothetical protein, conserved	0	2.83113	0.00347091	1.92361
Tb927.2.4980	hypothetical protein, conserved	0	5.35963	6.60413e-07	1.91289
Tb09.160.1260	hypothetical protein, conserved	0	3.2886	0.000114476	1.90475
Tb927.10.13920	hypothetical protein, conserved	0	3.88978	0.000497394	1.90461
Tb11.02.2450	hypothetical protein, conserved	0	2.87128	0.00404329	1.89931
Tb927.3.2370	hypothetical protein, conserved	0	2.77695	0.00361128	1.89734
Tb927.6.4620	hypothetical protein, conserved	0	4.30934	5.93072e-06	1.88852
Tb927.10.11530	hypothetical protein, conserved	0	2.75763	0.00282014	1.86277
Tb927.10.4550	hypothetical protein, conserved	0	3.08848	0.000894689	1.86153
Tb927.10.8160	hypothetical protein, conserved	0	5.29428	6.37727e-06	1.85207
Tb927.4.2370	hypothetical protein, conserved	0	2.45948	0.00485045	1.82586
Tb927.3.2360	hypothetical protein, conserved	0	2.94912	0.00166415	1.82266
Tb927.10.7920	hypothetical protein, conserved	0	2.47891	0.00958179	1.81809
Tb11.03.0440	hypothetical protein, conserved	0	2.69409	0.00363217	1.79198
Tb927.7.2960	hypothetical protein, conserved	0	3.24106	0.00170242	1.775
Tb11.02.4330	hypothetical protein, conserved	0	6.17461	9.17188e-09	1.77006
Tb927.5.4410	hypothetical protein, conserved	0	3.50498	0.000285863	1.76864
Tb927.10.13770	hypothetical protein, conserved	0	6.15239	2.5817e-07	1.75091
Tb927.1.2985	hypothetical protein, conserved	0	4.21695	9.06983e-05	1.75054
Tb11.01.1510	hypothetical protein, conserved	0	3.00872	0.000369991	1.70705
Tb927.8.5320	hypothetical protein, conserved	0	2.83586	0.00225465	1.69799
Tb11.02.2270	hypothetical protein, conserved	0	4.1623	0.000128564	1.6975
Tb09.160.2170	hypothetical protein, conserved	0	3.02429	0.00155822	1.66229
Tb11.01.4190	hypothetical protein, conserved	0	2.89252	0.00145664	1.65557
Tb927.10.13810	hypothetical protein, conserved	0	3.8189	0.00020845	1.61264
Tb927.10.4850	hypothetical protein, conserved	0	4.97743	5.95763e-07	1.60276
Tb927.10.13910	hypothetical protein, conserved	0	3.27161	0.00415635	1.60209
Tb927.6.4610	hypothetical protein, conserved	0	2.53268	0.00953192	1.59794
Tb927.2.2590	hypothetical protein, conserved	0	3.64086	0.000316113	1.57266
Tb927.10.14700	hypothetical protein, conserved	0	2.53457	0.00425085	1.56708
Tb11.02.5090	proliferator-activated receptor-interacting protein (PRIP) interacting protein (PIMT), putative, pseudogene	0	3.40387	0.000778671	1.56595
Tb11.01.1700	hypothetical protein, conserved	0	3.32122	0.000266907	1.55301
Tb927.10.1860	hypothetical protein, conserved	0	3.87314	1.69804e-05	1.54854
Tb11.01.3030	hypothetical protein, conserved	0	3.82853	6.13976e-05	1.54755
Tb927.5.3080	hypothetical protein, conserved	0	2.63481	0.00736418	1.54309
Tb927.5.2110	hypothetical protein, conserved	0	3.32088	0.000488585	1.53975
Tb927.10.13340	hypothetical protein, conserved	0	3.51164	0.00163291	1.53593
Tb11.55.0005	hypothetical protein, conserved	0	2.59796	0.00396623	1.52774
Tb927.10.6550	hypothetical protein, conserved	0	2.84232	0.0016662	1.52589
Tb11.02.5460	hypothetical protein, conserved	0	3.18326	0.000341433	1.52407
Tb927.8.2290	hypothetical protein, conserved	0	2.85871	0.00273847	1.52401
Tb927.5.720	hypothetical protein	0	2.60996	0.0053731	1.52391
Tb927.10.4970	hypothetical protein, conserved	0	2.62607	0.0064346	1.50392
Tb927.6.4360	hypothetical protein, conserved	0	2.79448	0.0043598	1.50279
Tb09.160.3930	hypothetical protein, conserved	0	2.77609	0.00164117	1.50184
Tb927.8.2170	hypothetical protein, conserved	0	5.53276	3.00991e-06	1.49836
Tb927.6.2270	hypothetical protein, conserved	0	3.10121	0.000136378	1.48653
Tb11.01.4120	hypothetical protein, conserved	0	4.56633	8.26744e-05	1.48582
Tb11.01.8000	hypothetical protein, conserved	0	2.92462	0.00204274	1.48024
Tb927.6.4330	hypothetical protein, conserved	0	2.86844	0.00496644	1.47673
Tb927.4.3730	hypothetical protein, conserved	0	2.73374	0.00431356	1.4645
Tb927.10.6650	hypothetical protein, conserved ,G10 protein homologue, putative	0	3.35329	0.00253469	1.46394
Tb11.02.5000	NGG1 interacting factor 3-like	0	4.58659	0.00195502	1.45838
Tb927.7.1380	hypothetical protein, conserved	0	3.00204	0.00262811	1.45252
Tb11.01.3490	hypothetical protein, conserved	0	4.69252	0.00147547	1.44899
Tb927.10.5060	hypothetical protein, conserved	0	3.82721	0.000182578	1.44801
Tb11.02.0590	hypothetical protein, conserved	0	4.1974	0.00309072	1.43837
Tb11.02.0465	hypothetical protein, conserved	0	4.11394	3.98899e-05	1.43597
Tb09.160.0440	hypothetical protein, conserved	0	3.35915	0.000261857	1.42729
Tb11.02.2530	hypothetical protein, conserved	0	4.52693	4.56489e-06	1.42577
Tb09.211.1740	hypothetical protein, conserved	0	4.949	3.08279e-06	1.42028
Tb927.5.1800	hypothetical protein, conserved	0	2.39785	0.00628329	1.4139
Tb11.01.0620	hypothetical protein, conserved	0	3.21041	0.000338175	1.41201
Tb927.3.4170	hypothetical protein, conserved	0	3.61877	0.000719578	1.37424
Tb09.160.0380	hypothetical protein, conserved	0	3.01863	0.000319279	1.34336
Tb927.4.5100	hypothetical protein, conserved	0	2.55659	0.0034419	1.33535
Tb927.5.1670	hypothetical protein, conserved	0	3.36883	0.000115093	1.32379
Tb927.5.2770	hypothetical protein, conserved	0	2.35143	0.00812123	1.32324
Tb927.6.2120	hypothetical protein, conserved	0	4.49821	5.21951e-06	1.32097
Tb927.2.4650	hypothetical protein, conserved	0	3.478	0.00278603	1.32029
Tb927.7.4800	hypothetical protein, conserved	0	3.42531	0.00273562	1.30231
Tb927.10.4820	hypothetical protein, conserved	0	2.5227	0.00904546	1.30177
Tb927.3.3120	hypothetical protein, conserved	0	2.75952	0.00152712	1.30167
Tb927.10.9680	hypothetical protein, conserved	0	2.67164	0.00245512	1.29855
Tb11.02.2420	hypothetical protein, conserved	0	3.63992	0.00422901	1.29663
Tb927.3.3620	hypothetical protein, conserved	0	3.75182	0.000961986	1.28888
Tb927.10.8060	hypothetical protein, conserved	0	3.29193	8.26744e-05	1.28529
Tb09.160.2230	hypothetical protein, conserved	0	3.66416	0.000161482	1.27495
Tb09.160.1710	hypothetical protein, conserved	0	2.62727	0.00496113	1.26082
Tb927.10.9380	hypothetical protein, conserved	0	3.24884	0.000399512	1.25838
Tb09.211.0530	hypothetical protein, conserved	0	3.26937	0.000341433	1.25612
Tb927.7.4760	hypothetical protein, conserved	0	2.57449	0.00641818	1.25435
Tb927.4.4690	hypothetical protein, conserved	0	2.59903	0.00379678	1.25298
Tb09.211.0520	hypothetical protein, conserved	0	2.7176	0.00192908	1.25101
Tb927.3.2300	hypothetical protein, conserved	0	4.36157	1.25722e-05	1.25
Tb09.211.4520	hypothetical protein, conserved	0	3.55835	4.81113e-05	1.24015
Tb927.10.14650	hypothetical protein, conserved	0	3.03491	0.000445231	1.21324
Tb927.10.5130	hypothetical protein, conserved	0	2.85878	0.00126203	1.19337
Tb927.2.4800	hypothetical protein, conserved	0	2.67689	0.00178564	1.19181
Tb927.10.10330	hypothetical protein, conserved	0	2.4598	0.006216	1.19095
Tb927.4.700	hypothetical protein, conserved	0	2.94865	0.00272789	1.17925
Tb927.10.8640	hypothetical protein, conserved	0	3.80158	9.63522e-05	1.16653
Tb11.03.0430	hypothetical protein, conserved	0	3.09653	0.0020852	1.16451
Tb09.160.5660	hypothetical protein, conserved	0	4.64491	2.08988e-06	1.16186
Tb11.02.3900	hypothetical protein, conserved	0	2.90909	0.000707738	1.15188
Tb11.02.4060	hypothetical protein, conserved	0	3.2707	0.00316213	1.1477
Tb927.5.4370	hypothetical protein, conserved	0	4.48137	3.78589e-05	1.14417
Tb927.8.5840	hypothetical protein, conserved	0	3.4484	0.00262472	1.13708
Tb11.01.5170	hypothetical protein, conserved	0	3.64535	0.000248947	1.136
Tb927.4.480	hypothetical protein, conserved	0	3.36887	0.00111693	1.13515
Tb927.8.5520	hypothetical protein, conserved	0	3.44833	0.00103379	1.13478
Tb927.8.3210	hypothetical protein, conserved	0	3.50034	0.000350365	1.11802
Tb11.52.0015	hypothetical protein, conserved	0	2.45447	0.00627075	1.11183
Tb927.10.7910	hypothetical protein, conserved	0	4.23168	3.54563e-05	1.10748
Tb11.01.1720	hypothetical protein, conserved	0	3.53033	0.000158056	1.10157
Tb927.5.3000	hypothetical protein, conserved	0	2.36715	0.00970926	1.09628
Tb927.10.1730	hypothetical protein, conserved	0	3.15998	0.000314078	1.08969
Tb927.4.850	hypothetical protein, conserved	0	5.30595	2.50744e-06	1.08389
Tb927.1.650	hypothetical protein, conserved	0	3.90385	3.52998e-05	1.07076
Tb11.01.7840	hypothetical protein, conserved	0	3.43288	0.00250454	1.056
Tb09.244.2810	hypothetical protein, conserved	0	3.6854	0.000293366	1.05053
Tb927.6.2440	hypothetical protein, conserved	0	3.62698	0.00170097	1.05004
Tb927.4.1470	hypothetical protein, conserved	0	2.82211	0.00437252	1.04887
Tb927.7.4960	hypothetical protein, conserved	0	2.31332	0.00860404	1.04881
Tb927.8.3070	hypothetical protein, conserved	0	3.38313	0.000463906	1.03659
Tb927.10.14660	hypothetical protein, conserved	0	3.13089	0.00101451	1.03518
Tb09.160.3550	hypothetical protein, conserved	0	3.46096	0.00047825	1.03446
Tb927.10.9030	hypothetical protein, conserved	0	3.58167	0.0044892	1.02981
Tb927.10.4790	hypothetical protein, conserved	0	4.14073	0.00011492	1.02221
Tb927.6.2190	hypothetical protein, conserved	0	3.99984	0.000386518	1.00163
Tb927.3.4070	hypothetical protein, conserved	0	3.62279	1.50946e-05	1
Tb11.02.3760	hypothetical protein, conserved	0	4.19461	0.000894947	1
Tb11.02.3770	hypothetical protein, conserved	0	4.32162	0.000515426	1
Tb927.8.6050	hypothetical protein, conserved	0	3.65298	0.000103498	0.988006
Tb927.7.3770	hypothetical protein, conserved	0	4.93022	4.89034e-06	0.987578
Tb927.2.1730	hypothetical protein, conserved	0	3.50419	0.000141886	0.980667
Tb927.7.5030	hypothetical protein, conserved	0	2.40634	0.00925642	0.961984
Tb927.6.4310	hypothetical protein, conserved	0	3.35039	8.6513e-05	0.961591
Tb927.4.3580	hypothetical protein, conserved	0	3.3606	0.000120218	0.952121
Tb11.02.4160	hypothetical protein, conserved	0	4.91089	7.17398e-07	0.949765
Tb927.8.3860	hypothetical protein, conserved ,WD-repeat containing protein	0	2.58963	0.00272733	0.947512
Tb927.10.15820	hypothetical protein, conserved	0	2.7569	0.00482026	0.942275
Tb927.10.10710	hypothetical protein, conserved	0	2.67057	0.00961999	0.939957
Tb927.6.1130	hypothetical protein, conserved	0	2.87999	0.00155558	0.938132
Tb927.1.840	hypothetical protein, conserved	0	3.27803	0.00298519	0.937992
Tb927.8.2730	hypothetical protein, conserved	0	3.34629	0.000599478	0.927505
Tb11.01.1240	hypothetical protein, conserved	0	2.53179	0.00853399	0.926215
Tb11.01.2210	hypothetical protein, conserved	0	3.2021	0.00158834	0.923218
Tb11.01.4150	hypothetical protein, conserved	0	4.28445	0.000409991	0.907444
Tb927.3.3710	hypothetical protein, conserved	0	2.87038	0.00230981	0.891576
Tb927.10.1600	hypothetical protein, conserved	0	2.7263	0.00387411	0.886964
Tb11.01.0300	hypothetical protein, conserved	0	4.23436	0.000409619	0.880448
Tb11.02.1030	hypothetical protein, conserved	0	3.95864	3.55822e-05	0.880214
Tb927.8.3600	hypothetical protein, conserved	0	2.90039	0.00306356	0.862084
Tb927.3.760	hypothetical protein, conserved	0	3.1307	0.00316985	0.861624
Tb11.01.6920	hypothetical protein, conserved	0	3.18797	0.000508575	0.849017
Tb11.01.7920	hypothetical protein, conserved	0	2.85809	0.00685875	0.844343
Tb09.160.1570	hypothetical protein, conserved	0	3.6538	0.00206718	0.842421
Tb927.1.3730	hypothetical protein	0	6.25992	2.58324e-10	0.833312
Tb927.10.15740	hypothetical protein, conserved	0	2.87264	0.00151493	0.826418
Tb927.4.2150	hypothetical protein, conserved	0	2.96694	0.00242185	0.824866
Tb927.2.4750	hypothetical protein, conserved	0	3.71408	1.91953e-05	0.818094
Tb927.2.4900	hypothetical protein, conserved	0	3.68925	2.24844e-05	0.805186
Tb927.4.3600	hypothetical protein, conserved	0	3.97526	7.27218e-05	0.789476
Tb11.01.5460	hypothetical protein, conserved	0	2.73896	0.0029363	0.789255
Tb11.02.5290	hypothetical protein, conserved	0	3.24154	0.00834209	0.782794
Tb927.7.2520	hypothetical protein, conserved	0	2.67253	0.00676744	0.759843
Tb927.8.2700	hypothetical protein, conserved	0	3.30088	0.00425497	0.728761
Tb11.02.1040	XPA-interacting protein, putative	0	4.35707	0.000358574	0.717051
Tb927.4.4200	hypothetical protein, conserved	0	2.81987	0.00265092	0.689546
Tb927.5.750	hypothetical protein, conserved	0	4.30102	0.000450189	0.684209
Tb927.10.11230	hypothetical protein, conserved	0	4.12144	8.23699e-05	0.681011
Tb927.10.9980	hypothetical protein, conserved	0	2.65003	0.00641712	0.673585
Tb927.5.920	hypothetical protein, conserved	0	3.05374	0.000937414	0.670604
Tb11.02.0420	hypothetical protein, conserved	0	3.77305	0.000243461	0.651622
Tb927.2.5260	hypothetical protein, conserved	0	3.2472	0.00235498	0.626481
Tb927.2.5830	hypothetical protein, conserved	0	4.08703	0.000519434	0.624014
Tb11.02.5165	hypothetical protein, conserved	0	6.25867	2.46125e-05	0.571413
Tb09.211.3290	hypothetical protein, conserved	0	4.66981	0.00106902	0.465231
Tb11.18.0018	hypothetical protein, conserved	0	4.431	0.00179196	0.440242
Tb11.03.0300	hypothetical protein, conserved	0	3.15374	0.000800015	0.392599
Tb927.10.6890	hypothetical protein	0	6.4581	2.17292e-10	0.291857
Tb927.8.6040	hypothetical protein, conserved	0	6.92725	6.78185e-08	0.142408
Tb927.10.4000	methylglutaconyl-CoA hydratase, mitochondrial precursor, putative	Amino acid metabolism	3.01694	0.00461114	9.97617
Tb927.1.3000	aminoacylase, putative ,N-acyl-L-amino acid amidohydrolase, putative	Amino acid metabolism	2.88958	0.000557416	2.85247
Tb11.01.1440	glycine synthase, putative	Amino acid metabolism	2.98771	0.00168869	1.37693
Tb10.v4.0036	#N/A	Amino acid metabolism	2.67671	0.00645235	1.24462
Tb927.10.4460	leucine carboxyl methyltransferase, putative	Amino acid metabolism	2.67671	0.00645235	1.24462
Tb11.02.1160	calmodulin, putative	Calcium	2.65879	0.00686383	20.7234
Tb11.02.5800	calmodulin, putative	Calcium	2.876	0.00512949	1.97375
Tb927.10.8710	centrin, putative	Cell cycle	4.25631	0.00151497	13.9901
Tb927.7.3410	centrin, putative	Cell cycle	2.77831	0.00088212	3.617
Tb927.8.1080	centrin, putative ,caltractin, putative	Cell cycle	3.21986	0.000260049	2.59253
Tb927.10.15690	anaphase promoting complex, subunit 10-like protein	Cell cycle	2.55932	0.00476771	1.95196
Tb927.2.5980	ATP-dependent Clp protease subunit, heat shock protein 100 (HSP100), putative ,serine peptidase, putative	Chaperone	2.4959	0.00415066	13.6404
Tb927.10.8540	chaperone protein DNAj, putative	Chaperone	7.28724	8.50457e-11	8.46115
Tb927.10.2620	hypothetical protein, conserved	chaperone	3.34523	0.000115524	7.31886
Tb927.10.4620	peptidyl-prolyl cis-trans isomerase, putative	Chaperone	4.30502	0.000185176	5.86585
Tb927.3.5340	Hsc70-interacting protein (Hip), putative	Chaperone	3.04693	0.000259525	2.71673
Tb927.10.5040	chaperone protein DNAj, putative	Chaperone	2.45846	0.00685499	2.44791
Tb11.01.3110	heat shock protein 70	Chaperone	2.28065	0.00656194	2.3256
Tb927.8.7010	chaperone protein DNAj, putative	Chaperone	4.70953	1.17248e-06	2.16527
Tb927.7.280	cyclophilin-type peptidyl-prolyl cis-trans isomerase, putative	Chaperone	2.65445	0.00316611	1.92492
Tb09.211.4720	chaperone protein DNAj, putative	Chaperone	2.86278	0.000925337	1.30824
Tb927.7.4770	cyclophilin-type peptidyl-prolyl cis-trans isomerase, putative	Chaperone	2.31946	0.00589836	1
Tb927.7.1340	10 kDa heat shock protein, putative	Chaperone	3.35717	3.38875e-05	0.834434
Tb927.7.1320	10 kDa heat shock protein, putative	Chaperone	3.22559	5.44096e-05	0.576195
Tb927.7.2820	histone H2A, putative	Chromatin	4.19332	6.13792e-07	2.94939
Tb927.7.2830	histone H2A, putative	Chromatin	4.20251	5.95763e-07	2.86575
Tb927.7.2840	histone H2A, putative	Chromatin	4.20251	5.95763e-07	2.86575
Tb927.7.2850	histone H2A, putative	Chromatin	4.20251	5.95763e-07	2.86575
Tb927.7.2880	histone H2A, putative	Chromatin	4.20251	5.95763e-07	2.86575
Tb927.7.2890	histone H2A, putative	Chromatin	4.20251	5.95763e-07	2.86575
Tb927.7.2900	histone H2A, putative	Chromatin	4.20251	5.95763e-07	2.86575
Tb927.7.2910	histone H2A, putative	Chromatin	4.20251	5.95763e-07	2.86575
Tb927.7.2920	histone H2A, putative	Chromatin	4.20251	5.95763e-07	2.86575
Tb927.7.2930	histone H2A, putative	Chromatin	4.20708	5.95763e-07	2.84305
Tb927.7.2860	histone H2A, putative	Chromatin	4.1508	7.25971e-07	2.60534
Tb927.7.2870	histone H2A, putative	Chromatin	4.1508	7.25971e-07	2.60534
Tb927.7.2940	histone H2A, putative	Chromatin	4.1508	7.25971e-07	2.60534
Tb11.55.0001	histone H1, putative	Chromatin	2.45664	0.00421735	2.33832
Tb11.42.0006	histone H1, putative	Chromatin	2.54375	0.00380844	1.77467
Tb11.42.0007	histone H1, putative	Chromatin	2.92555	0.00524083	1.39475
Tb927.7.1690	silent information regulator 2	Chromatin	2.79296	0.00355647	1.32153
Tb927.5.4190	histone H4, putative	Chromatin	3.90535	0.00090887	1.06862
Tb927.5.4220	histone H4, putative	Chromatin	3.90535	0.00090887	1.06862
Tb927.5.4180	histone H4, putative	Chromatin	4.80799	0.00381605	0.769438
Tb927.5.4260	histone H4, putative	Chromatin	4.72995	0.00174162	0.722087
Tb927.5.4170	histone H4, putative	Chromatin	4.40762	0.000318764	0.579349
Tb927.1.2430	histone H3, putative	Chromatin	2.88599	0.000377664	0.528205
Tb927.1.2510	histone H3, putative	Chromatin	2.88599	0.000377664	0.528205
Tb927.1.2550	histone H3, putative	Chromatin	2.88599	0.000377664	0.528205
Tb927.1.2450	histone H3, putative	Chromatin	2.88658	0.000377566	0.528088
Tb927.1.2490	histone H3, putative	Chromatin	3.05624	0.000222023	0.524943
Tb927.1.2470	histone H3, putative	Chromatin	2.88487	0.000382658	0.513453
Tb927.1.2530	histone H3, putative	Chromatin	2.89915	0.000361422	0.506169
Tb927.10.10480	histone H2B, putative	Chromatin	3.87725	5.34525e-05	0.169431
Tb927.10.10520	histone H2B, putative	Chromatin	3.87725	5.34525e-05	0.169431
Tb11.01.5260	radial spoke protein RSP11, putative	Cytoskeleton	2.76969	0.00448805	18.0961
Tb927.3.2310	flagellar component ,PACRGA	Cytoskeleton	3.4314	0.00634015	7.31449
Tb927.3.3770	paraflagellar rod component, putative	Cytoskeleton	2.72723	0.00114584	2.90226
Tb927.10.1140	epsilon tubulin	Cytoskeleton	2.55819	0.00519024	1.94796
Tb09.211.3970	ankyrin repeat protein, putative	Cytoskeleton	3.25149	0.00029539	1.68683
Tb11.01.4180	ankyrin repeat protein, putative	Cytoskeleton	2.73503	0.00500262	1.47509
Tb927.5.4440	dynein light chain, putative	Cytoskeleton	4.87358	0.000201616	0.667117
Tb11.01.5350	profilin	Cytoskeleton_Actin	5.45498	7.14455e-09	1.87702
Tb11.01.1870	actin-like protein, putative	Cytoskeleton_Actin	2.91771	0.000916624	1.57808
Tb09.160.2990	DNA-damage inducible protein DDI1-like protein	DNA synthesis, modification, repair	3.14879	0.00294416	3.53363
Tb11.01.1270	nucleic acid binding protein, putative	DNA synthesis, modification, repair	2.51684	0.00619054	2.03122
Tb927.10.13970	uracil-DNA glycosylase, putative	DNA synthesis, modification, repair	2.47682	0.00450704	1.91731
Tb927.3.4810	hypothetical protein, conserved	DNA synthesis, modification, repair	3.05078	0.000744123	0.821605
Tb927.7.4930	ribonuclease H1	DNA synthesis, modification, repair	4.33987	1.59533e-05	0.553595
Tb927.10.3150	N-acetyltransferase, putative	Enzyme	2.58657	0.00272789	2.99351
Tb927.4.1950	NADPH--cytochrome p450 reductase, putative	Enzyme	3.58016	7.85964e-05	2.67888
Tb927.4.4980	adrenodoxin precursor, putative	Enzyme	3.64398	0.000184987	2.47453
Tb927.10.7850	protein-L-isoaspartate, putative	Enzyme	4.8764	5.56172e-07	2.45586
Tb09.211.4600	short-chain dehydrogenase, putative	Enzyme	2.75947	0.00158255	0.993923
Tb11.01.1780	short-chain dehydrogenase, putative	Enzyme	2.64078	0.0029363	0.986893
Tb927.10.4680	NUDIX hydrolase, conserved ,predicted MutT/NUDIX family protein	Enzyme	3.29019	0.00123787	0.876578
Tb927.2.1920	expression site-associated gene (ESAG) protein, putative ,expression site-associated gene 5 (ESAG5) protein, putative	ESAG	2.66618	0.001246	7.20109
Tb927.2.5800	sedoheptulose-1,7-bisphosphatase	Glucose & glycerol	2.55535	0.00468015	6.39771
Tb11.01.2110	phosphoglycerate mutase family member 5, putative	Glucose & glycerol	3.01004	0.000253058	4.5628
Tb11.02.4200	splicing factor Prp31	Glucose & glycerol	2.84473	0.00587803	1.18125
Tb927.10.4610	dolicholphosphate-mannose synthase, putative	Glycan synthesis & metabolism	2.70201	0.00160518	7.82119
Tb927.6.1820	phosphatidic acid phosphatase, putative	Glycan synthesis & metabolism	2.36435	0.00789218	1.11639
Tb927.10.4700	hypothetical protein, conserved	Glycan synthesis & metabolism	3.12856	0.000418895	1.03585
Tb927.2.4720	dolichyl-P-Man:Man7GlcNAc2-PP-dolichylalpha6-ma nn osyltransferase,putative	Glycan synthesis & metabolism	2.48211	0.00764008	0.752682
Tb09.160.0620	peroxisomal membrane protein 4, putative	Glycosome biogenesis	2.52659	0.00547979	2.97429
Tb927.3.3610	peroxisomal targeting signal type 2 receptor, putative ,peroxin 7	Glycosome biogenesis	2.4794	0.0084452	2.82273
Tb927.10.210	GPI transamidase component GAA1	GPI anchors & metabolism	3.08902	0.000313103	3.64854
Tb11.01.7400	GPI transamidase	GPI anchors & metabolism	3.50681	0.000135647	2.55905
Tb11.01.0770	cation transporter, putative	Ion channel or pump	2.69749	0.000858589	1.62366
Tb11.01.0730	cation transporter, putative	Ion channel or pump	2.89406	0.000282612	1.45653
Tb11.01.0725	cation transporter, putative	Ion channel or pump	3.46868	2.24737e-05	1.44705
Tb11.01.0760	cation transporter, putative	Ion channel or pump	2.76	0.000681622	1.37508
Tb927.10.4040	short-chain dehydrogenase, putative	Lipids & fatty acids	3.13092	0.00020845	15.6259
Tb927.8.7440	lipase, putative	Lipids & fatty acids	2.40085	0.00836522	9.65838
Tb11.01.8200	enoyl-CoA hydratase/isomerase family protein, putative	Lipids & fatty acids	2.85513	0.00239275	3.20226
Tb11.52.0018	phospholipid-transporting ATPase, putative	Lipids & fatty acids	2.96085	0.000233869	1.43145
Tb11.02.5470	vacuolar type h%2B ATPase subunit, putative	Lysosome	3.18178	0.000156233	2.73074
Tb927.7.3320	ATG12/APG12, putative	Lysosome	2.73787	0.00730081	1.75166
Tb927.10.12450	hypothetical protein, conserved	Lysosome	2.62605	0.00522691	1.20234
Tb927.10.200	vacuolar ATP synthase, putative	Lysosome	3.07413	0.000117301	1
Tb927.6.480	EP3-2 procyclin ,PARP A-beta ,surface protein EP3-2 ,surface protein EP3-2 procyclin precursor ,procyclic form specific polypeptide A-beta precursor	Membrane	6.50278	0.00770775	6.09802
Tb927.10.11220	procyclic form surface glycoprotein	Membrane	2.89796	0.00307462	5.67282
Tb927.6.450	EP3-2 procyclin ,PARP ,procyclin PARP A ,procyclin B1- alpha ,procyclic acidic repetitive protein A.beta ,procyclic form specific polypeptide B1-alpha precursor	Membrane	6.04206	0.00114221	4.92205
Tb927.6.520	EP3-2 procyclin ,PARP A-beta ,surface protein EP3-3 procyclin precursor ,procyclic form specific polypeptide A-beta precursor	Membrane	4.70471	0.0017373	2.94374
Tb927.10.6510	chaperonin HSP60, mitochondrial precursor	Mitochondrial biogenesis	5.83046	2.40233e-08	3.61456
Tb927.10.6400	chaperonin HSP60, mitochondrial precursor	Mitochondrial biogenesis	5.88851	9.62391e-09	3.58531
Tb11.03.0475	hypothetical protein, conserved	Mitochondrial biogenesis	3.52524	0.000139723	1.22332
Tb927.10.6070	universal minicircle sequence binding protein (UMSBP), putative ,predicted zinc finger protein	Mitochondrial DNA	2.48361	0.003533	0.375556
Tb927.10.4880	hypothetical protein, conserved	Mitochondrial electron transport	3.03043	0.00166501	14.7789
Tb11.01.1690	hypothetical protein, conserved	Mitochondrial electron transport	3.37388	0.000288286	5.89194
Tb11.02.4485	cytochrome b5, putative	Mitochondrial electron transport	3.20677	0.00339504	4.74679
Tb927.10.12540	electron transfer protein, putative ,ferredoxin, putative	Mitochondrial electron transport	3.54496	0.000101216	2.79173
Tb927.3.3470	cytochrome b5, putative	Mitochondrial electron transport	3.18088	0.00343409	1.76022
Tb927.7.890	electron transfer protein, putative	Mitochondrial electron transport	2.72986	0.00432967	0.889324
Tb927.7.3520	hypothetical protein, conserved	Mitochondrial pathway	3.53182	0.000160627	13.1044
Tb11.01.2280	ubiquinone biosynthesis methyltransferase, putative	Mitochondrial pathway	3.22356	0.000705834	11.5105
Tb927.5.3090	hypothetical protein, conserved	Mitochondrial pathway	2.94831	0.00120705	8.62383
Tb927.4.3450	hypothetical protein, conserved	Mitochondrial pathway	2.44395	0.00634896	6.99591
Tb927.10.3040	hypothetical protein, conserved	Mitochondrial pathway	2.58738	0.00580084	6.26876
Tb927.10.1160	hypothetical protein, conserved	Mitochondrial pathway	4.89735	2.03358e-06	3.33498
Tb927.7.840	hypothetical protein, conserved	Mitochondrial pathway	3.87226	0.0001207	2.43114
Tb11.01.3860	hypothetical protein, conserved	Mitochondrial pathway	6.91781	2.89855e-09	1.9218
Tb927.3.3660	hypothetical protein, conserved	Mitochondrial pathway	2.49792	0.00719471	1.76979
Tb11.01.5180	ubiquinone biosynthesis protein-like protein	Mitochondrial pathway	3.30875	0.000937414	1.17678
Tb927.3.4890	ubiquinone biosynthesis protein COQ7 homolog, putative	Mitochondrial pathway	4.9329	1.7074e-06	1.1311
Tb927.8.4440	mitochondrial carrier protein, putative	Mitochondrial pathway	4.07934	0.000234147	1.08841
Tb927.8.580	hypothetical protein, conserved	Mitochondrial pathway	2.84616	0.00203479	1.03382
Tb927.2.2940	hypothetical protein, conserved	Mitochondrial pathway	3.18029	0.00316985	1.00098
Tb11.55.0009	mitochondrial RNA binding protein 1 ,gBP21, MRP1	Mitochondrial RNA	2.47109	0.00406692	3.83411
Tb927.2.6070	hypothetical protein, conserved	Mitochondrial RNA	6.25022	2.51818e-06	1.89274
Tb927.10.5110	KREPA4	Mitochondrial RNA	3.30521	0.0037931	1.19603
Tb927.6.4580	hypothetical protein, conserved	Mitochondrial translation	3.40449	0.00397709	5.00731
Tb11.01.1810	hypothetical protein, conserved	Mitochondrial translation	3.78996	0.000926876	2.47597
Tb927.8.4550	hypothetical protein, conserved	Mitochondrial translation	4.00937	1.82959e-05	2.21406
Tb927.10.1870	hypothetical protein, conserved	Mitochondrial translation	3.58684	0.000146574	2.15045
Tb11.03.0260	hypothetical protein, conserved	Mitochondrial translation	5.22082	1.14687e-05	1.7244
Tb927.7.3240	hypothetical protein, conserved	Mitochondrial translation	5.35926	1.32772e-07	1.66434
Tb11.01.2170	hypothetical protein, conserved	Mitochondrial translation	3.05296	0.000737702	1.59759
Tb11.01.1840	hypothetical protein, conserved	Mitochondrial translation	2.7833	0.00178325	1.58465
Tb11.01.7140	hypothetical protein, conserved	Mitochondrial translation	2.90333	0.00329753	1.55354
Tb09.211.4510	hypothetical protein, conserved	Mitochondrial translation	3.01968	0.001157	1.44702
Tb927.3.820	hypothetical protein, conserved	Mitochondrial translation	2.83585	0.00279435	1.44468
Tb09.211.2580	30S Ribosomal protein S17, putative	Mitochondrial translation	6.00137	6.00608e-08	1.23491
Tb11.01.1215	cyclophilin type peptidyl-prolyl cis-trans isomerase, putative	Mitochondrial translation	3.06483	0.00263833	1.15086
Tb927.4.930	50S ribosomal protein L14, putative	Mitochondrial translation	3.36431	0.000698042	1.13674
Tb927.10.11350	hypothetical protein, conserved	Mitochondrial translation	3.42873	0.000574893	1.12722
Tb927.8.1430	hypothetical protein, conserved	Mitochondrial translation	2.5851	0.00838228	1.07988
Tb927.5.3410	hypothetical protein, conserved	Mitochondrial translation	4.66887	3.2507e-05	1.06168
Tb927.5.4120	hypothetical protein, conserved	Mitochondrial translation	3.10249	0.00654595	0.977093
Tb927.6.2480	chaperone protein DNAj, putative	Mitochondrial translation	2.34349	0.00997657	0.970999
Tb927.4.4610	hypothetical protein, conserved	Mitochondrial translation	2.69697	0.00626137	0.689227
Tb927.4.1800	ribosomal protein L3, mitochondrial, putative	Mitochondrial translation	4.41982	3.61817e-07	0.410923
Tb927.7.1170	RNA-binding protein, putative	Nucleo-cytoplasmic transport	2.79416	0.00196281	2.03456
Tb927.6.1970	nuclear cap binding protein, putative	Nucleo-cytoplasmic transport	2.85954	0.00508091	0.863515
Tb927.4.1720	nucleoside diphosphate kinase, putative	Nucleotides	2.48116	0.00461114	2.4043
Tb927.10.2540	adenylate kinase, putative	Nucleotides-Purines	2.47975	0.00606594	3.39149
Tb927.5.3970	adenylate kinase, putative	Nucleotides-Purines	2.55458	0.00461114	3.25784
Tb927.10.730	ATP synthase, putative	Oxidative phosphorylation	2.2388	0.00805183	16.4244
Tb927.1.3820	ATP synthase subunit, putative	Oxidative phosphorylation	3.51873	0.000186918	10.8971
Tb11.02.2950	ATPase subunit 9, putative	Oxidative phosphorylation	3.66353	0.00103705	4.14886
Tb927.6.530	procyclin associated gene 3 (PAG3) protein ,procyclin PARP A ,procyclic acidic repetitive protein A	PAG	2.56541	0.00649179	0.996937
Tb927.6.460	procyclin associated gene 3 (PAG3) protein ,procyclin PARP A ,procyclic acidic repetitive protein A	PAG	2.48336	0.00731932	0.931109
Tb927.2.4870	kinetoplastid-specific dual specificity phosphatase, putative	Phosphatase	3.71197	6.59538e-05	1.42171
Tb927.4.690	geranylgeranyl transferase type II beta subunit, putative	Prenylation	3.01668	0.000754842	1.0053
Tb927.6.560	cysteine peptidase C (CPC) ,CPC cysteine peptidase, Clan CA, family C1, Cathepsin B-like	Protease or peptidase	3.77562	5.39299e-06	5.96064
Tb927.6.1050	cysteine peptidase precursor ,cysteine peptidase, Clan CA, family C1, Cathepsin L-like	Protease or peptidase	7.63696	2.5299e-12	2.99
Tb927.6.990	cysteine peptidase precursor ,cysteine peptidase, Clan CA, family C1, Cathepsin L-like	Protease or peptidase	7.6122	2.70073e-12	2.93633
Tb927.6.980	cysteine peptidase precursor ,cysteine peptidase, Clan CA, family C1, Cathepsin L-like	Protease or peptidase	7.62151	2.62422e-12	2.87322
Tb927.6.1030	cysteine peptidase precursor ,cysteine peptidase, Clan CA, family C1, Cathepsin L-like	Protease or peptidase	7.6718	2.33224e-12	2.847
Tb927.6.1040	cysteine peptidase precursor ,cysteine peptidase, Clan CA, family C1, Cathepsin L-like	Protease or peptidase	7.6718	2.33224e-12	2.847
Tb927.6.1000	cysteine peptidase precursor ,cysteine peptidase, Clan CA, family C1, Cathepsin L-like	Protease or peptidase	7.66661	2.33224e-12	2.81549
Tb927.6.1020	cysteine peptidase precursor ,cysteine peptidase, Clan CA, family C1, Cathepsin L-like	Protease or peptidase	7.59452	2.92431e-12	2.76162
Tb927.6.1010	cysteine peptidase precursor ,cysteine peptidase, Clan CA, family C1, Cathepsin L-like	Protease or peptidase	7.49437	3.80851e-12	2.47714
Tb927.6.960	cysteine peptidase precursor ,cysteine peptidase, Clan CA, family C1, Cathepsin L-like	Protease or peptidase	7.49437	3.80851e-12	2.47714
Tb927.6.1060	cysteine peptidase precursor ,cysteine peptidase, Clan CA, family C1, Cathepsin L-like	Protease or peptidase	7.49927	3.80851e-12	2.47447
Tb927.6.970	cysteine peptidase precursor ,cysteine peptidase, Clan CA, family C1, Cathepsin L-like	Protease or peptidase	7.47788	4.14294e-12	2.44257
Tb09.160.0580	Mov34/MPN/PAD-1 metallopeptidase, putative ,metallo-peptidase, Clan MP, Family M67	Protease or peptidase	2.46806	0.00764174	2.20929
Tb927.2.5230	protein kinase, putative	Protein kinase	2.96923	0.00288484	1.58126
Tb11.03.0290	protein kinase, putative	Protein kinase	2.91231	0.00088095	1.33645
Tb927.3.3290	protein kinase, putative	Protein kinase	2.50834	0.00922988	0.853562
Tb927.10.16160	protein kinase, putative	Protein kinase	3.15059	0.000994372	0.794192
Tb927.3.3380	TFIIF-stimulated CTD phosphatase, putative	Protein phosphatase	2.68874	0.0023089	16.3904
Tb927.4.3680	protein phosphatase 2C, putative	Protein phosphatase	3.34875	0.000275185	1.61981
Tb927.6.1230	kinetoplastid-specific phospho-protein phosphatase	Protein phosphatase	2.6062	0.00427322	1.52032
Tb09.160.2100	low molecular weight protein tyrosine phosphatase, putative	Protein phosphatase	5.71098	0.000108248	0.701916
Tb927.6.4290	hypothetical protein, conserved (pseudogene)	pseudogene	3.27196	0.000119598	1.00599
Tb927.8.1390	hypothetical protein, conserved (pseudogene) ,hypothetical protein, conserved, degenerate	pseudogene	4.27416	1.64423e-06	0.198572
Tb927.10.10420	monothiol glutaredoxin, putative	Redox pathways	4.33119	1.03848e-05	2.90344
Tb11.01.7560	glutathione peroxidase, putative	Redox pathways	3.45106	0.00336459	1.40371
Tb927.3.3780	tryparedoxin	Redox pathways	2.21589	0.00758419	1
Tb927.3.3760	tryparedoxin	Redox pathways	2.23803	0.00686396	1
Tb927.7.5170	60S ribosomal protein L23a ,60S ribosomal protein L25	Ribosome	4.43086	0.000973217	2.14361
Tb927.7.5180	60S ribosomal protein L23a, putative	Ribosome	4.68241	0.00235949	1.77917
Tb927.4.5170	ribosomal protein L7/L12, putative	Ribosome	6.18942	1.12766e-06	1.29649
Tb11.02.4070	60S ribosomal protein L28, putative	Ribosome	2.21426	0.00917689	1
Tb927.10.3840	60S ribosomal protein L18a, putative	Ribosome	2.26108	0.00770635	1
Tb11.02.0740	60S ribosomal protein L44	Ribosome	2.2641	0.00682367	1
Tb927.10.1100	60S ribosomal protein L9, putative	Ribosome	2.29365	0.00527073	1
Tb927.6.4690	60S ribosomal protein L9, putative	Ribosome	2.31131	0.00467413	1
Tb09.211.3270	60S ribosomal subunit protein L31, putative	Ribosome	2.56034	0.00143484	1
Tb11.02.1830	40S ribosomal protein S12	Ribosome	2.56078	0.00137832	1
Tb927.10.1080	40S ribosomal protein S23, putative	Ribosome	2.67573	0.000603331	1
Tb927.10.1090	40S ribosomal protein S23, putative	Ribosome	2.68591	0.000567385	1
Tb09.160.0710	60S ribosomal protein L35, putative	Ribosome	2.73787	0.000764041	1
Tb09.211.3280	60S ribosomal subunit protein L31, putative	Ribosome	2.75903	0.000533885	1
Tb09.160.0700	60S ribosomal protein L35, putative	Ribosome	2.78097	0.000608027	1
Tb927.10.3930	40S ribosomal protein S3A, putative	Ribosome	2.85919	0.00031747	1
Tb927.10.3940	40S ribosomal protein S3A, putative	Ribosome	2.94705	0.000198519	1
Tb11.01.3676	40S ribosomal protein S17, putative	Ribosome	2.94772	0.000245633	1
Tb927.4.2180	60S ribosomal protein L35a, putative	Ribosome	2.96713	0.000287216	1
Tb11.01.3675	40S ribosomal protein S17, putative	Ribosome	2.98999	0.000195897	1
Tb927.10.7340	40S ribosomal protein S24E, putative	Ribosome	3.19509	6.09958e-05	1
Tb11.46.0002	60S acidic ribosomal subunit protein, putative	Ribosome	3.33954	3.98899e-05	1
Tb927.10.7330	40S ribosomal protein S24E, putative	Ribosome	3.3465	2.76964e-05	1
Tb11.46.0001	60S acidic ribosomal subunit protein, putative	Ribosome	3.40839	2.85977e-05	1
Tb927.5.1610	60S ribosomal protein L13a, putative	Ribosome	3.50085	2.04409e-05	1
Tb927.3.1370	40S ribosomal protein S25, putative	Ribosome	3.52738	1.40344e-05	1
Tb927.3.3310	60S ribosomal protein L13, putative	Ribosome	3.71397	7.81061e-06	1
Tb927.3.3320	60S ribosomal protein L13, putative	Ribosome	3.73341	7.13151e-06	1
Tb927.8.1110	40S ribosomal protein S9, putative	Ribosome	3.79831	6.49294e-06	1
Tb927.7.2370	40S ribosomal protein S15, putative	Ribosome	3.8502	4.99223e-06	1
Tb927.7.2340	40S ribosomal protein S15, putative	Ribosome	3.88006	4.47101e-06	1
Tb927.4.3550	60S ribosomal protein L13a, putative	Ribosome	4.11491	1.46964e-06	1
Tb11.01.5720	ribosomal protein L18, putative	Ribosome	4.13812	1.498e-06	1
Tb927.8.6150	40S ribosomal protein S8, putative	Ribosome	4.26101	5.63959e-07	1
Tb927.8.6160	40S ribosomal protein S8, putative	Ribosome	4.36968	3.57973e-07	1
Tb927.6.5130	60S acidic ribosomal protein P2, putative	Ribosome	5.0683	3.89343e-08	1
Tb927.6.5120	60S acidic ribosomal protein P2, putative	Ribosome	5.30811	1.20863e-08	1
Tb927.6.2110	40S ribosomal protein S30, putative	Ribosome	6.45336	6.55988e-08	1
Tb927.6.2100	40S ribosomal protein S30, putative	Ribosome	6.61708	9.29786e-09	1
Tb11.02.1085	40S ribosomal protein S4, putative	Ribosome	6.91696	5.77683e-11	1
Tb11.02.1090	40S ribosomal protein S4, putative	Ribosome	6.99312	4.66107e-11	1
Tb11.01.0355	ribosomal protein S26, putative	Ribosome	8.06788	7.51033e-10	1
Tb927.10.1590	ribosomal protein L36, putative	Ribosome	8.53578	4.16088e-11	1
Tb927.6.720	40S ribosomal protein L14, putative	Ribosome	3.57127	6.84926e-05	0.888518
Tb927.10.2840	ribosomal protein S25, putative	Ribosome	3.5922	1.67837e-05	0.854559
Tb09.211.4550	60S ribosomal protein L12, putative	Ribosome	3.74247	7.81061e-06	0.82299
Tb927.10.11540	40S ribosomal protein S3, putative	Ribosome	4.63956	1.38575e-07	0.740772
Tb11.02.4350	40S ribosomal protein S21, putative	Ribosome	2.81018	0.000460764	0.722133
Tb927.5.1820	60S acidic ribosomal protein, putative	Ribosome	4.41988	2.36407e-07	0.700182
Tb09.160.4450	40S ribosomal protein S3, putative	Ribosome	4.00012	2.02703e-06	0.696256
Tb09.244.2730	60S ribosomal protein L5, putative	Ribosome	3.5733	1.40344e-05	0.671689
Tb927.3.4360	40S ribosomal protein S15A, putative	Ribosome	6.28996	0.000196706	0.670404
Tb09.244.2630	40S ribosomal protein S6, putative	Ribosome	4.10812	1.12766e-06	0.633114
Tb927.3.5050	60S ribosomal protein L4	Ribosome	2.70015	0.000832453	0.630227
Tb09.160.2490	ribosomal protein S7, putative	Ribosome	10.6655	0.000187026	0.618047
Tb09.244.2740	60S ribosomal protein L5, putative	Ribosome	3.55262	1.56577e-05	0.573983
Tb09.160.2550	ribosomal protein S7, putative	Ribosome	10.7077	2.35215e-05	0.550695
Tb11.02.4360	40S ribosomal protein S21, putative	Ribosome	2.82103	0.000470042	0.542778
Tb927.7.3680	ubiquitin/ribosomal protein S27a, putative	Ribosome	3.09626	0.000132533	0.523693
Tb927.10.11390	60S ribosomal protein L6, putative	Ribosome	4.51705	2.05325e-07	0.516999
Tb09.160.4200	60S acidic ribosomal protein, putative	Ribosome	4.21732	7.25971e-07	0.502472
Tb09.211.0865	60S ribosomal protein L37, putative	Ribosome	6.17449	7.51033e-10	0.500267
Tb09.211.0340	60S ribosomal protein L10, putative ,QM-like protein	Ribosome	5.3461	1.74452e-08	0.495208
Tb11.01.3020	40S ribosomal protein L14, putative	Ribosome	3.67063	1.28594e-05	0.495059
Tb09.211.0110	60S ribosomal protein L10, putative ,QM-like protein	Ribosome	5.38207	1.5395e-08	0.493626
Tb927.7.230	40S ribosomal protein S33, putative	Ribosome	4.17878	1.02414e-06	0.48485
Tb927.10.6370	60S ribosomal proteins L37, putative	Ribosome	6.33664	1.20121e-10	0.477395
Tb927.10.5340	40S ribosomal protein S18, putative	Ribosome	3.5312	1.18088e-05	0.459857
Tb927.10.14710	40S ribosomal protein S2, putative	Ribosome	4.44259	2.82909e-07	0.451469
Tb927.7.240	40S ribosomal protein S33, putative	Ribosome	4.24466	8.39763e-07	0.450066
Tb927.10.14600	40S ribosomal protein S2, putative	Ribosome	4.48326	2.35538e-07	0.447415
Tb11.02.4000	40S ribosomal protein S15A, putative	Ribosome	3.67743	8.11208e-06	0.434148
Tb927.6.4980	40S ribosomal protein S14	Ribosome	3.61302	1.19916e-05	0.413083
Tb927.4.1790	ribosomal protein L3, putative	Ribosome	4.42081	3.61063e-07	0.410923
Tb927.10.15120	40S ribosomal protein S13, putative	Ribosome	4.26406	0.000341433	0.390502
Tb09.160.5580	60S ribosomal protein L11, putative	Ribosome	4.82153	7.57017e-08	0.386286
Tb11.02.1840	60S ribosomal protein L18, putative	Ribosome	4.26838	5.95763e-07	0.378819
Tb927.10.5330	40S ribosomal protein S18, putative	Ribosome	3.81043	3.91229e-06	0.356421
Tb11.01.1480	60S ribosomal protein L34, putative	Ribosome	5.60435	3.21398e-07	0.356264
Tb927.10.190	40S ribosomal protein S6, putative	Ribosome	5.04369	2.09268e-08	0.351532
Tb927.7.5000	60S ribosomal protein L19, putative	Ribosome	7.70055	2.5299e-12	0.337026
Tb09.160.5590	60S ribosomal protein L11, putative	Ribosome	4.72194	1.0881e-07	0.334862
Tb927.7.5020	60S ribosomal protein L19, putative	Ribosome	7.60444	3.30829e-12	0.334256
Tb09.211.2640	60S ribosomal protein L23, putative	Ribosome	4.65803	0.000366274	0.333577
Tb927.10.12680	60S ribosomal protein L34, putative	Ribosome	5.37916	6.00336e-08	0.32357
Tb09.211.2630	60S ribosomal protein L23, putative	Ribosome	4.70057	0.000637388	0.319883
Tb927.2.5910	40S ribosomal protein S13, putative	Ribosome	4.50923	6.65844e-05	0.316878
Tb09.244.2590	60S ribosomal protein L32	Ribosome	2.56496	0.0038414	0.314984
Tb927.6.5040	ribosomal protein L15, putative	Ribosome	3.46681	1.82959e-05	0.310274
Tb11.02.4170	40S ribosomal protein S5, putative	Ribosome	3.64564	2.51439e-05	0.307092
Tb927.8.1340	60S ribosomal protein L7a, putative	Ribosome	5.75468	3.87822e-09	0.293503
Tb09.244.2725	ribosomal protein L36, putative	Ribosome	9.23542	1.5188e-12	0.282023
Tb927.8.6030	60S ribosomal protein L12, putative	Ribosome	4.20208	7.67729e-07	0.281728
Tb09.244.2720	ribosomal protein L15, putative	Ribosome	3.55711	1.56577e-05	0.281501
Tb927.10.9800	60S ribosomal protein L22	Ribosome	2.70199	0.000663422	0.274255
Tb927.8.1330	60S ribosomal protein L7a, putative	Ribosome	5.75207	3.91277e-09	0.271033
Tb927.7.1050	40S ribosomal protein S16, putative	Ribosome	3.85668	3.40876e-06	0.254151
Tb927.10.3380	60S acidic ribosomal protein P2, putative	Ribosome	3.63961	1.13108e-05	0.252714
Tb927.10.3370	60S acidic ribosomal protein P2, putative	Ribosome	3.71955	7.78508e-06	0.252239
Tb927.10.5360	40S ribosomal protein S10, putative	Ribosome	7.14649	1.04273e-11	0.251477
Tb927.7.1730	60S ribosomal protein L7, putative	Ribosome	3.75436	5.56416e-06	0.250465
Tb927.7.1740	60S ribosomal protein L7, putative	Ribosome	3.73622	6.04358e-06	0.250254
Tb927.10.5610	40S ribosomal protein S9, putative	Ribosome	5.14653	3.13017e-08	0.248059
Tb927.7.1750	60S ribosomal protein L7, putative	Ribosome	3.78924	4.78703e-06	0.244307
Tb927.10.14580	60S ribosomal protein L17, putative	Ribosome	6.76835	7.77201e-11	0.241727
Tb927.10.5370	40S ribosomal protein S10, putative	Ribosome	7.15295	6.28594e-11	0.240623
Tb927.5.1110	60S ribosomal protein L2, putative ,60S ribosomal protein L8, putative	Ribosome	5.96925	1.8601e-09	0.238937
Tb927.8.6180	60S ribosomal protein L26, putative	Ribosome	3.38263	3.56474e-05	0.237054
Tb11.01.7545	60S ribosomal protein L27, putative	Ribosome	4.12312	8.62993e-07	0.236889
Tb11.01.7535	60S ribosomal protein L27, putative	Ribosome	4.12463	8.59124e-07	0.235098
Tb927.7.1040	40S ribosomal protein S16, putative	Ribosome	3.75626	5.74978e-06	0.234174
Tb11.01.2560	40S ribosomal protein SA, putative	Ribosome	3.47038	0.000751198	0.231105
Tb11.01.2680	40S ribosomal protein SA, putative	Ribosome	3.47143	0.000744807	0.231105
Tb11.01.1475	40S ribosomal protein S27, putative	Ribosome	3.88936	4.56133e-06	0.230241
Tb927.10.560	40S ribosomal proteins S11, putative	Ribosome	3.26634	9.01357e-05	0.229954
Tb927.10.270	60S ribosomal protein L32, putative	Ribosome	3.45035	1.98689e-05	0.226471
Tb11.01.7960	60S ribosomal protein L2, putative ,60S ribosomal protein L8, putative	Ribosome	6.78969	1.44874e-10	0.226385
Tb927.10.9880	60S ribosomal protein L18, putative	Ribosome	4.65522	1.16497e-07	0.217244
Tb11.50.0005	ribosomal protein L21E (60S), putative	Ribosome	4.75897	7.57017e-08	0.215479
Tb09.211.2650	60S ribosomal protein L27a ,60S ribosomal protein L28 ,60S ribosomal protein L29	Ribosome	4.69881	8.85417e-08	0.209733
Tb09.v1.0640	60S ribosomal protein L27a ,60S ribosomal protein L28 ,60S ribosomal protein L29	Ribosome	4.69883	8.85417e-08	0.209667
Tb927.10.5030	ubiquitin/ribosomal protein S27a, putative	Ribosome	6.27948	3.82972e-10	0.205073
Tb11.02.2430	60S ribosomal protein L17, putative	Ribosome	3.52577	2.96506e-05	0.196156
Tb927.10.8430	40S ribosomal protein S12, putative	Ribosome	4.89178	5.33963e-08	0.193415
Tb11.01.1790	60S ribosomal protein L29, putative	Ribosome	5.01607	2.24844e-05	0.161194
Tb09.211.4850	60S ribosomal protein L26, putative	Ribosome	4.68002	1.63081e-07	0.1611
Tb927.10.5460	60S ribosomal protein L24, putative	Ribosome	6.82305	9.63884e-11	0.160619
Tb927.10.5480	60S ribosomal protein L24, putative	Ribosome	7.12236	3.54413e-11	0.159838
Tb11.02.0500	60S ribosomal protein L37, putative	Ribosome	4.99863	0.00587137	0.155963
Tb927.4.1100	ribosomal protein L21E (60S), putative	Ribosome	4.66179	1.46182e-07	0.146188
Tb11.02.0840	RNA-binding protein, putative	RNA binding	4.59252	1.853e-06	2.52863
Tb927.10.15870	RNA binding protein, putative	RNA binding	2.86455	0.00188167	1.44759
Tb11.01.7000	RNA-binding protein, putative	RNA binding	2.75976	0.0032132	0.969889
Tb927.10.13570	RNA-binding protein, putative	RNA binding	3.16175	0.000301766	0.816183
Tb927.10.14080	RNA-binding protein, putative ,RBP27	RNA binding	3.22086	0.000236867	0.811696
Tb927.10.12330	hypothetical protein, conserved ,zinc finger protein family member, putative	RNA binding	2.58277	0.00262597	0.593897
Tb927.4.410	CAF 40	RNA degradation	4.08936	1.62407e-06	8.13903
Tb11.01.2820	exosome-associated protein 4	RNA degradation	4.30258	4.0118e-06	1.72771
Tb11.01.5540	Pab1p-dependent poly(A) ribonuclease subunit, putative ,PAN3	RNA degradation	3.62328	4.08314e-05	1.54145
Tb11.01.8320	exosome-associated protein 2	RNA degradation	4.00938	4.13071e-05	1.1548
Tb09.160.5160	exosome complex exonuclease RRP40	RNA degradation	2.85172	0.00155508	0.98217
Tb927.10.7450	exosome complex exonuclease RRP41A ,Rrp41p homologue	RNA degradation	3.13174	0.00096753	0.865366
Tb927.6.670	ribosomal RNA processing protein 45 ,exosome complex exonuclease	RNA degradation	2.96832	0.00693595	0.688364
Tb927.6.600	CCR4 associated factor, putative	RNA degradation	2.6387	0.00301161	0.373026
Tb09.160.2150	U6 snRNA-associated Sm-like protein LSm6p ,Sm- like protein	RNA processing	3.25245	0.00185969	5.12153
Tb927.4.890	small nuclear ribonucleoprotein SmD3, putative	RNA processing	4.1426	0.000317079	2.50636
Tb927.10.4950	small nuclear ribonucleoprotein, putative	RNA processing	3.72199	5.57979e-05	2.36482
Tb927.2.5850	small nuclear ribonucleoprotein SmD2	RNA processing	3.59344	6.56118e-05	1.90098
Tb11.01.5535	U6 snRNA-associated Sm-like protein LSm4p	RNA processing	3.19708	0.001157	1.68452
Tb927.10.7470	RNA-binding protein, putative	RNA processing	4.01138	3.43818e-05	1.60003
Tb927.6.2330	RGG protein ,hypothetical protein, conserved	RNA processing	3.10121	0.000136378	1.48653
Tb927.10.7390	hypothetical protein, conserved	RNA processing	4.14922	6.03148e-05	1.45892
Tb927.6.4340	U6 snRNA-associated Sm-like protein LSm5p	RNA processing	2.57026	0.00617218	1.32123
Tb11.01.4600	cleavage and polyadenylation specificity factor 30 kDa subunit ,CPSF 30 kDa subunit ,NS1 effector domain- binding protein 1	RNA processing	2.88474	0.000778671	1.14767
Tb927.10.2120	hypothetical protein, conserved	RNA processing	2.75266	0.00547303	0.995784
Tb927.3.3160	poly(A) polymerase ,polynucleotide adenylyltransferase	RNA processing	2.70925	0.00361128	0.975951
Tb927.8.5180	U6 snRNA-associated sm-like protein Lsm2	RNA processing	2.77736	0.00560123	0.734183
Tb927.8.4830	U1 small nuclear ribonucleoprotein, putative	RNA processing	3.20833	0.00500753	0.64374
Tb11.01.1990	hypothetical protein, conserved	RNA synthesis	2.40781	0.00879012	3.42622
Tb927.4.3510	DNA-directed RNA polymerase subunit, putative	RNA synthesis	2.9077	0.0023618	1.81378
Tb927.5.970	class I transcription factor A, subunit 6	RNA synthesis I	3.20682	0.00187039	15.0281
Tb11.01.2190	DNA-directed RNA polymerase, putative	RNA synthesis I	3.36129	0.00100253	0.808611
Tb927.10.4840	transcription factor IIa, putative	RNA synthesis II	3.99465	2.66332e-05	11.9457
Tb11.02.5790	RNA polymerase B subunit RPB8, putative	RNA synthesis II	3.94168	3.33756e-05	11.0005
Tb927.10.13320	DNA-directed RNA polymerases II subunit, putative	RNA synthesis II	2.84021	0.00227463	3.0176
Tb927.4.3490	DNA-directed RNA polymerase subunit, putative ,RNA polymerase subunit, putative	RNA synthesis II	3.05023	0.000465473	1.76524
Tb927.3.1250	DNA-directed RNA polymerase subunit, putative ,RNA polymerase subunit, putative	RNA synthesis II	2.76357	0.00337374	1.4784
Tb11.01.0625	DNA-dependent RNA polymerases, putative	RNA synthesis III	2.78051	0.00162791	2.81022
Tb927.10.7500	fibrillarin	rRNA-tRNA processing	3.42486	0.000235466	4.98793
Tb927.10.170	pseudouridine synthase, Cbf5p	rRNA-tRNA processing	2.31414	0.00714265	4.90745
Tb927.10.7190	D-tyrosyl-tRNA deacylase, putative	rRNA-tRNA processing	5.72208	3.5535e-07	1.80981
Tb11.01.5570	RNA-binding protein	rRNA-tRNA processing	3.4838	4.08644e-05	1.71549
Tb09.160.2000	pseudouridylate synthase, putative	rRNA-tRNA processing	2.48077	0.00809216	1.33834
Tb11.01.5590	RNA-binding protein	rRNA-tRNA processing	3.34136	7.57017e-05	1.19141
Tb927.4.4170	rRNA methyltransferase, putative	rRNA-tRNA processing	3.7267	0.000871409	0.877591
Tb927.10.4740	nucleolar RNA-binding protein, putative	rRNA-tRNA processing	6.3586	2.15852e-08	0.375905
Tb927.6.4120	GTPase activating protein, putative	Signalling	2.60546	0.00651297	0.751026
Tb11.02.3850	ras-like small GTPase, putative	Signalling	3.42728	0.00119496	0.591721
Tb11_snoRNA_0002	#N/A	SNO	2.82879	0.00763782	11.0182
Tb11_snoRNA_0020	#N/A	SNO	2.82879	0.00763782	11.0182
Tb927_11_01_v4.snoRNA.0026	C/D snoRNA	SNO	2.82879	0.00763782	11.0182
Tb927_11_01_v4.snoRNA.0029	C/D snoRNA	SNO	2.82879	0.00763782	11.0182
Tb11_snoRNA_0026	#N/A	SNO	2.81117	0.00805183	10.7934
Tb927_11_01_v4.snoRNA.0030	C/D snoRNA	SNO	2.81117	0.00805183	10.7934
Tb11_snoRNA_0014	#N/A	SNO	3.78282	0.00219902	7.82751
Tb927_11_01_v4.snoRNA.0028	C/D snoRNA	SNO	3.78282	0.00219902	7.82751
Tb927_06_v4.snoRNA.0034	H/ACA-like snoRNA	SNO	7.29002	6.54814e-10	7.15498
Tb927_06_v4.snoRNA.0036	H/ACA-like snoRNA	SNO	7.29002	6.54814e-10	7.15498
Tb927_06_v4.snoRNA.0038	H/ACA-like snoRNA	SNO	7.29002	6.54814e-10	7.15498
Tb927.6.1852	#N/A	SNO	7.29002	6.54814e-10	7.15498
Tb927.6.1867	#N/A	SNO	7.29002	6.54814e-10	7.15498
Tb927.6.1883	#N/A	SNO	7.29002	6.54814e-10	7.15498
Tb927_06_v4.snoRNA.0035	H/ACA-like snoRNA	SNO	7.5995	3.54081e-10	6.98251
Tb927.6.1859	#N/A	SNO	7.5995	3.54081e-10	6.98251
Tb09_snoRNA_0011	#N/A	SNO	4.62952	2.66455e-05	6.97967
Tb09_snoRNA_0020	#N/A	SNO	4.62952	2.66455e-05	6.97967
Tb09_snoRNA_0029	#N/A	SNO	4.62952	2.66455e-05	6.97967
Tb09_snoRNA_0038	#N/A	SNO	4.62952	2.66455e-05	6.97967
Tb09_snoRNA_0047	#N/A	SNO	4.62952	2.66455e-05	6.97967
Tb09_snoRNA_0056	#N/A	SNO	4.62952	2.66455e-05	6.97967
Tb09_snoRNA_0065	#N/A	SNO	4.62952	2.66455e-05	6.97967
Tb927_09_v4.snoRNA.0073	C/D snoRNA	SNO	4.62952	2.66455e-05	6.97967
Tb927_09_v4.snoRNA.0074	C/D snoRNA	SNO	4.62952	2.66455e-05	6.97967
Tb927_09_v4.snoRNA.0075	C/D snoRNA	SNO	4.62952	2.66455e-05	6.97967
Tb927_09_v4.snoRNA.0076	C/D snoRNA	SNO	4.62952	2.66455e-05	6.97967
Tb927_09_v4.snoRNA.0077	C/D snoRNA	SNO	4.62952	2.66455e-05	6.97967
Tb927_09_v4.snoRNA.0078	C/D snoRNA	SNO	4.62952	2.66455e-05	6.97967
Tb927_09_v4.snoRNA.0079	C/D snoRNA	SNO	4.62952	2.66455e-05	6.97967
Tb09_snoRNA_0074	#N/A	SNO	4.73449	1.6298e-05	6.63877
Tb927_09_v4.snoRNA.0080	C/D snoRNA	SNO	4.73449	1.6298e-05	6.63877
Tb927_06_v4.snoRNA.0022	H/ACA-like snoRNA	SNO	7.3713	1.6147e-08	5.86602
Tb927.6.1892	#N/A	SNO	7.3713	1.6147e-08	5.86602
Tb927_06_v4.snoRNA.0018	H/ACA-like snoRNA	SNO	10.4997	1.03916e-13	5.81693
Tb927_06_v4.snoRNA.0019	H/ACA-like snoRNA	SNO	10.4997	1.03916e-13	5.81693
Tb927_06_v4.snoRNA.0020	H/ACA-like snoRNA	SNO	10.4997	1.03916e-13	5.81693
Tb927_06_v4.snoRNA.0021	H/ACA-like snoRNA	SNO	10.4997	1.03916e-13	5.81693
Tb927.6.1853	#N/A	SNO	10.4997	1.03916e-13	5.81693
Tb927.6.1861	#N/A	SNO	10.4997	1.03916e-13	5.81693
Tb927.6.1868	#N/A	SNO	10.4997	1.03916e-13	5.81693
Tb927.6.1884	#N/A	SNO	10.4997	1.03916e-13	5.81693
Tb927_06_v4.snoRNA.0005	C/D snoRNA	SNO	6.25402	2.43241e-07	5.18393
Tb927.6.1857	#N/A	SNO	6.25402	2.43241e-07	5.18393
Tb927_10_v4.snoRNA.0018:snoRNA	snoRNA	SNO	9.60689	1.87043e-10	3.92188
Tb927_06_v4.snoRNA.0002	C/D snoRNA	SNO	5.66	2.51439e-05	3.48915
Tb927.6.1865	#N/A	SNO	5.66	2.51439e-05	3.48915
Tb927_10_v4.snoRNA.0021:snoRNA	snoRNA	SNO	6.12912	4.89462e-07	3.46947
Tb927_06_v4.snoRNA.0030	C/D snoRNA	SNO	7.81974	1.853e-06	3.23558
Tb927_06_v4.snoRNA.0031	C/D snoRNA	SNO	7.81974	1.853e-06	3.23558
Tb927_06_v4.snoRNA.0032	C/D snoRNA	SNO	7.81974	1.853e-06	3.23558
Tb927.6.1874	#N/A	SNO	7.81974	1.853e-06	3.23558
Tb927.6.1882	#N/A	SNO	7.81974	1.853e-06	3.23558
Tb927.6.1889	#N/A	SNO	7.81974	1.853e-06	3.23558
Tb927_10_v4.snoRNA.0019:snoRNA	snoRNA	SNO	6.15272	3.87154e-07	2.94763
Tb927_10_v4.snoRNA.0041:snoRNA	snoRNA	SNO	4.0262	0.000304204	2.90163
Tb927_10_v4.snoRNA.0015:snoRNA	snoRNA	SNO	7.70315	7.19061e-09	2.79403
Tb927_10_v4.snoRNA.0017:snoRNA	snoRNA	SNO	7.70315	7.19061e-09	2.79403
Tb927_10_v4.snoRNA.0016:snoRNA	snoRNA	SNO	7.781	5.07692e-09	2.74495
Tb09_snoRNA_0036	#N/A	SNO	6.32916	1.46374e-06	2.38872
Tb927_09_v4.snoRNA.0084	C/D snoRNA	SNO	6.32916	1.46374e-06	2.38872
Tb927_10_v4.snoRNA.0061:snoRNA	snoRNA	SNO	3.0296	0.00626778	2.37988
Tb09_snoRNA_0063	#N/A	SNO	7.01195	1.8606e-07	2.04745
Tb927_09_v4.snoRNA.0087	C/D snoRNA	SNO	7.01195	1.8606e-07	2.04745
Tb09_snoRNA_0018	#N/A	SNO	7.01195	1.8606e-07	1.82984
Tb09_snoRNA_0045	#N/A	SNO	7.01195	1.8606e-07	1.82984
Tb09_snoRNA_0072	#N/A	SNO	7.01195	1.8606e-07	1.82984
Tb927_09_v4.snoRNA.0082	C/D snoRNA	SNO	7.01195	1.8606e-07	1.82984
Tb927_09_v4.snoRNA.0085	C/D snoRNA	SNO	7.01195	1.8606e-07	1.82984
Tb927_09_v4.snoRNA.0088	C/D snoRNA	SNO	7.01195	1.8606e-07	1.82984
Tb09_snoRNA_0054	#N/A	SNO	7.07834	1.61283e-07	1.82984
Tb927_09_v4.snoRNA.0086	C/D snoRNA	SNO	7.07834	1.61283e-07	1.82984
Tb09_snoRNA_0027	#N/A	SNO	7.1401	1.33911e-07	1.82984
Tb927_09_v4.snoRNA.0083	C/D snoRNA	SNO	7.1401	1.33911e-07	1.82984
Tb10_snoRNA_0034:snoRNA	snoRNA	SNO	4.09025	0.000605867	1.81737
Tb09_snoRNA_0009	#N/A	SNO	6.47385	5.21951e-06	1.80748
Tb927_09_v4.snoRNA.0081	C/D snoRNA	SNO	6.47385	5.21951e-06	1.80748
Tb09_snoRNA_0100	#N/A	SNO	3.80156	8.87499e-05	1.70507
Tb09_snoRNA_0106	#N/A	SNO	3.80156	8.87499e-05	1.70507
Tb927_09_v4.snoRNA.0049	C/D snoRNA	SNO	3.80156	8.87499e-05	1.70507
Tb927_09_v4.snoRNA.0050	C/D snoRNA	SNO	3.80156	8.87499e-05	1.70507
Tb09_snoRNA_0094	#N/A	SNO	3.93402	0.000109968	1.62181
Tb927_09_v4.snoRNA.0048	C/D snoRNA	SNO	3.93402	0.000109968	1.62181
Tb927_08_v4.snoRNA.0024	C/D snoRNA	SNO	3.40802	0.00431356	1.60575
Tb927.8.2252	#N/A	SNO	3.40802	0.00431356	1.60575
Tb09_snoRNA_0095	#N/A	SNO	2.97471	0.00681608	1.56897
Tb09_snoRNA_0107	#N/A	SNO	2.97471	0.00681608	1.56897
Tb927_09_v4.snoRNA.0089	H/ACA-like snoRNA	SNO	2.97471	0.00681608	1.56897
Tb927_09_v4.snoRNA.0090	H/ACA-like snoRNA	SNO	2.97471	0.00681608	1.56897
Tb09_snoRNA_0118	#N/A	SNO	3.77102	0.000774146	1.46192
Tb927_09_v4.snoRNA.0052	C/D snoRNA	SNO	3.77102	0.000774146	1.46192
Tb10_snoRNA_0049:snoRNA	snoRNA	SNO	5.12122	7.48194e-05	1.41663
Tb09_snoRNA_0099	#N/A	SNO	4.80084	7.30399e-05	1.40719
Tb927_09_v4.snoRNA.0095	H/ACA-like snoRNA	SNO	4.80084	7.30399e-05	1.40719
Tb09_snoRNA_0105	#N/A	SNO	4.77595	0.000574893	1.27314
Tb927_09_v4.snoRNA.0096	H/ACA-like snoRNA	SNO	4.77595	0.000574893	1.27314
Tb927_11_01_v4.snoRNA.0007	C/D snoRNA	SNO	3.6235	0.00202623	1.07785
Tb11_snoRNA_0039	#N/A	SNO	3.58479	0.0022244	1.07009
Tb927_10_v4.snoRNA.0026:snoRNA	snoRNA	SNO	7.17805	4.59187e-06	1.02396
Tb10_snoRNA_0084:snoRNA	snoRNA	SNO	9.65421	1.00851e-10	1
Tb09_snoRNA_0062	#N/A	SNO	5.52691	1.67765e-07	0.929005
Tb927_09_v4.snoRNA.0105	C/D snoRNA	SNO	5.52691	1.67765e-07	0.929005
Tb09_snoRNA_0053	#N/A	SNO	5.71657	8.31375e-08	0.856087
Tb927_09_v4.snoRNA.0104	C/D snoRNA	SNO	5.71657	8.31375e-08	0.856087
Tb927_10_v4.snoRNA.0011:snoRNA	snoRNA	SNO	11.8867	4.19011e-09	0.844804
Tb927_10_v4.snoRNA.0012:snoRNA	snoRNA	SNO	11.8867	4.19011e-09	0.844804
Tb927_10_v4.snoRNA.0013:snoRNA	snoRNA	SNO	11.8867	4.19011e-09	0.844804
Tb927_10_v4.snoRNA.0014:snoRNA	snoRNA	SNO	11.8867	4.19011e-09	0.844804
Tb09_snoRNA_0017	#N/A	SNO	6.05001	2.30914e-08	0.773861
Tb09_snoRNA_0044	#N/A	SNO	6.05001	2.30914e-08	0.773861
Tb09_snoRNA_0071	#N/A	SNO	6.05001	2.30914e-08	0.773861
Tb927_09_v4.snoRNA.0100	C/D snoRNA	SNO	6.05001	2.30914e-08	0.773861
Tb927_09_v4.snoRNA.0103	C/D snoRNA	SNO	6.05001	2.30914e-08	0.773861
Tb927_09_v4.snoRNA.0106	C/D snoRNA	SNO	6.05001	2.30914e-08	0.773861
Tb11_snoRNA_0041	H/ACA snoRNA, TB11Cs2H1 ,snoRNA TBR17	SNO	5.61613	1.80039e-09	0.753581
Tb11_snoRNA_0038	H/ACA snoRNA, TB11Cs2H1 ,snoRNA TBR17	SNO	5.41896	3.55902e-09	0.735704
Tb09_snoRNA_0035	#N/A	SNO	6.03995	2.30914e-08	0.734025
Tb927_09_v4.snoRNA.0102	C/D snoRNA	SNO	6.03995	2.30914e-08	0.734025
Tb09_snoRNA_0026	#N/A	SNO	5.52691	1.67765e-07	0.604189
Tb927_09_v4.snoRNA.0101	C/D snoRNA	SNO	5.52691	1.67765e-07	0.604189
Tb927_08_v4.snoRNA.0023	C/D snoRNA	SNO	4.27995	0.00204255	0.585381
Tb927.8.2083	#N/A	SNO	4.27995	0.00204255	0.585381
Tb927.8.5880	eukaryotic translation initiation factor 1A, putative	Translation	2.71808	0.0011386	11.6569
Tb11.39.0006	translation initiation factor eIF2B delta subunit, putative ,eIF-2B GDP-GTP exchange factor ,guanine nucleotide exchange factor subunit GCD2	Translation	2.35118	0.00524084	2.06141
Tb927.10.5300	eukaryotic translation initiation factor 6 (eIF-6), putative	Translation	3.48484	5.41764e-05	1.6833
Tb09.211.0120	nascent polypeptide associated complex subunit, putative	Translation	3.70276	1.40403e-05	1
Tb09.211.0130	nascent polypeptide associated complex subunit, putative	Translation	3.70575	1.40344e-05	1
Tb11.01.1465	nascent polypeptide associated complex alpha subunit, putative	Translation	3.38334	3.37896e-05	0.756204
Tb11.01.3180	guanine nucleotide-binding protein beta subunit-like protein ,activated protein kinase c receptor	Translation	2.857	0.00028516	0.239071
Tb11.01.3170	guanine nucleotide-binding protein beta subunit- like protein ,activated protein kinase c receptor	Translation	2.98782	0.000156321	0.207684
Tb927.6.1260	proteasome beta-1 subunit, putative	Ubiquitin & proteasome	2.55913	0.00216582	14.2923
Tb927.3.780	proteasome alpha 7 subunit	Ubiquitin & proteasome	3.61737	1.82228e-05	10.7012
Tb927.10.4980	ubiquitin-like protein DSK2, putative	Ubiquitin & proteasome	2.45083	0.00779907	8.33325
Tb11.02.5170	proteasome beta 3 subunit, putative	Ubiquitin & proteasome	3.53004	6.01975e-05	6.45032
Tb927.10.290	proteasome alpha 2 subunit, putative	Ubiquitin & proteasome	2.60681	0.00244089	6.07685
Tb09.211.2590	proteasome beta 2 subunit, putative ,20S proteasome subunit	Ubiquitin & proteasome	2.45901	0.00461114	5.05318
Tb09.211.1250	proteasome alpha 1 subunit, putative ,20S proteasome subunit alpha-6, (putative)	Ubiquitin & proteasome	2.27577	0.00821953	4.16472
Tb927.8.920	ubiquitin-conjugating enzyme e2, putative ,ubiquitin-protein ligase, putative ,ubiquitin carrier protein, putative	Ubiquitin & proteasome	4.26729	1.40344e-05	3.70728
Tb927.4.3460	ubiquitin-conjugating enzyme e2, putative ,ubiquitin carrier protein, putative ,ubiquitin-protein ligase, putative	Ubiquitin & proteasome	2.66537	0.00210937	2.87047
Tb927.10.230	proteasome alpha 5 subunit, putative ,20S proteasome subunit alpha 5	Ubiquitin & proteasome	4.45439	7.19172e-07	2.71466
Tb927.4.3190	ubiquitin-conjugating enzyme e2, putative ,ubiquitin carrier protein, putative ,ubiquitin-protein ligase, putative	Ubiquitin & proteasome	3.09181	0.000486719	2.70836
Tb927.10.2980	proteasome regulatory non-ATPase subunit 11 ,19S proteasome regulatory subunit, Metallo-peptidase, Clan MP, Family M67	Ubiquitin & proteasome	2.2946	0.00697997	1.79481
Tb927.10.3030	proteasome regulatory non-ATPase subunit 11 ,19S proteasome regulatory subunit, Metallo-peptidase, Clan MP, Family M67	Ubiquitin & proteasome	2.29756	0.006586	1.77929
Tb927.8.5380	hypothetical protein, conserved	ubiquitin/proteasome	3.52495	0.000130685	6.54153
Tb09.160.1040	hypothetical protein, unlikely	unlikely	5.10624	0.00392832	24.1428
Tb927.10.13940	hypothetical protein, unlikely	unlikely	9.75335	1.77548e-09	10.3381
Tb09.160.0420	hypothetical protein, unlikely	unlikely	3.37872	0.000462324	5.32486
Tb927.1.2480	hypothetical protein, unlikely	unlikely	3.33024	4.08644e-05	4.72997
Tb927.1.2560	hypothetical protein, unlikely	unlikely	3.33024	4.08644e-05	4.72997
Tb927.1.2440	hypothetical protein, unlikely	unlikely	3.26335	5.4167e-05	4.46136
Tb927.1.2500	hypothetical protein, unlikely	unlikely	3.26335	5.4167e-05	4.46136
Tb927.1.2540	hypothetical protein, unlikely	unlikely	3.26335	5.4167e-05	4.46136
Tb927.1.2520	hypothetical protein, unlikely	unlikely	3.23671	6.09833e-05	4.23779
Tb09.160.1620	hypothetical protein, unlikely	unlikely	16.3698	2.01922e-16	4.16972
Tb927.1.2460	hypothetical protein, unlikely	unlikely	3.23621	6.09958e-05	4.16721
Tb09.160.1630	hypothetical protein, unlikely	unlikely	16.5973	3.28092e-06	2.845
Tb09.211.4530	hypothetical protein, unlikely	unlikely	3.54915	0.00200548	1.44525
Tb09.v1.0200	hypothetical protein, unlikely	unlikely	3.55017	0.00162745	1.19666
Tb09.160.2500	hypothetical protein, unlikely	unlikely	3.0906	0.00290872	0.930975
Tb09.160.2560	hypothetical protein, unlikely	unlikely	3.0906	0.00290872	0.930975
Tb09.160.2420	syntaxin, putative	Vesicular transport	3.35012	0.000160792	13.5264
Tb927.5.4500	ras-like small GTPase, putative	Vesicular transport	2.65425	0.00149917	12.0544
Tb927.10.12960	ras-related protein rab-5 ,small GTPase, putative	Vesicular transport	3.05002	0.0029363	8.9128
Tb09.244.2760	cytosolic coat protein, putative	Vesicular transport	3.5835	2.1463e-05	6.75727
Tb927.8.4610	small GTP-binding protein Rab1	Vesicular transport	3.28588	0.000232193	6.40671
Tb927.10.14180	protein transport protein Sec13, putative ,cytosolic coat protein, putative	Vesicular transport	2.87825	0.00199439	6.07026
Tb927.8.2861	SRP RNA, 7SL	Vesicular transport	9.82958	0.00843606	6.00218
Tb927.8.4770	small GTP-binding protein Rab18	Vesicular transport	2.99664	0.00129952	5.18264
Tb927.3.4000	clathrin coat assembly protein ap19, putative	Vesicular transport	3.26307	0.000651133	4.46893
Tb927.3.3720	Golgi vesicular membrane trafficking protein, putative	Vesicular transport	4.43521	1.38459e-05	3.21419
Tb09.211.1330	hypothetical protein, conserved ,membrane- trafficking protein, putative	Vesicular transport	2.83245	0.000811536	2.30707
Tb927.10.13650	hypothetical protein, conserved	vesicular transport	9.18538	9.04453e-07	2.21181
Tb927.8.5030	trafficking protein particle complex subunit 3, putative ,TRAPP, putative ,transport protein particle (TRAPP) component, Bet3, putative	Vesicular transport	3.31958	0.000201616	1.95069
Tb09.160.0840	membrane protein YIP1, putative	Vesicular transport	2.53451	0.00843606	1.92298
Tb11.02.2160	small GTPase, putative ,small GTP-binding protein Rab5b, putative	Vesicular transport	2.81877	0.00303484	1.91953
Tb927.10.1520	small GTPase, putative ,Ras-related protein, putative	Vesicular transport	4.33284	4.58914e-06	1.536
Tb11.01.1230	ADP-ribosylation factor GTPase activating protein, putative	Vesicular transport	6.56986	7.57017e-08	1.355
Tb927.10.8580	ADP-ribosylation factor 3, putative ,ADP-ribosylation factor-like protein, putative	Vesicular transport	3.28528	0.00558111	1.34596
Tb11.01.2030	golgi SNARE protein-like ,GOLGI SNAP receptor complex member, putative	Vesicular transport	3.10728	0.000547872	1.33654
Tb927.7.6230	ADP-ribosylation factor, putative	Vesicular transport	3.43849	0.000644034	1.01921
Tb11.01.2990	oligomeric golgi complex component 8, putative	Vesicular transport	2.7709	0.00144491	0.942954
Tb11.01.0420	protein transport protein Sec13, putative	Vesicular transport	4.6731	1.96194e-05	0.935441
Tb927.10.6380	hypothetical protein, conserved ,ring finger containing protein	Zinc finger	3.51918	0.000456697	1.30372
Tb927.7.1840	zinc finger protein, putative	Zinc finger	3.05275	0.000246716	1.04889
Tb927.7.1880	zinc finger protein, putative	Zinc finger	3.05275	0.000246716	1.04889
Tb09.211.1655	hypothetical protein, conserved ,predicted zinc finger protein	#N/A	2.98379	0.00782602	1.75679

## Sheet: CAF1 down
geneID v5	Description	Class	foldChange (CAF1/WT)	padj	HL change (CAF1/WT)
Tb927.5.2320	hypothetical protein, conserved	0	0.380862	0.00208935	22.1073
Tb11.01.1880	hypothetical protein, conserved	0	0.409642	0.00860881	20.9733
Tb927.10.14430	hypothetical protein, conserved	0	0.321097	0.000263735	20.9659
Tb11.22.0010	hypothetical protein, conserved	0	0.230727	0.000578655	20.8186
Tb927.10.14480	hypothetical protein, conserved	0	0.377993	0.00348433	20.5058
Tb927.10.11640	hypothetical protein, conserved	0	0.374955	0.0069707	20.178
Tb09.211.3750	hypothetical protein, conserved	0	0.326225	0.000811863	20.1241
Tb11.02.0060	hypothetical protein, conserved	0	0.303491	0.00233911	20.0406
Tb927.10.2920	hypothetical protein, conserved	0	0.146107	2.28843e-08	19.7473
Tb11.02.1550	hypothetical protein, conserved	0	0.310774	0.00203645	19.6799
Tb927.8.6470	hypothetical protein, conserved	0	0.213408	0.0001677	19.6356
Tb11.01.5000	hypothetical protein, conserved	0	0.324799	0.000790181	19.5077
Tb927.10.7290	hypothetical protein, conserved	0	0.315407	0.000358352	19.5041
Tb11.47.0013	hypothetical protein, conserved	0	0.240872	0.00145015	19.4056
Tb927.8.3390	hypothetical protein, conserved	0	0.322608	0.00837009	19.0131
Tb11.02.0220	hypothetical protein, conserved	0	0.272216	0.000103314	18.8974
Tb927.1.1670	hypothetical protein, conserved	0	0.32259	0.000242575	18.7987
Tb927.6.3590	hypothetical protein, conserved	0	0.349006	0.0014134	18.7249
Tb927.10.9220	hypothetical protein, conserved	0	0.269809	0.00405692	18.6506
Tb927.8.6100	hypothetical protein, conserved	0	0.397281	0.00403631	18.6369
Tb927.7.3130	hypothetical protein, conserved	0	0.310042	0.00121413	18.5348
Tb927.10.6000	hypothetical protein, conserved	0	0.238422	3.1449e-06	18.3135
Tb11.01.0180	hypothetical protein, conserved	0	0.379549	0.00412483	18.3098
Tb11.01.2380	hypothetical protein, conserved	0	0.137885	4.19011e-09	18.2257
Tb927.8.6330	hypothetical protein, conserved	0	0.305945	0.000184925	18.2254
Tb927.7.2450	hypothetical protein, conserved	0	0.335102	0.00112814	18.2158
Tb927.6.3830	hypothetical protein, conserved	0	0.12508	0.000217832	18.0232
Tb927.10.4080	hypothetical protein, conserved	0	0.34302	0.00143281	17.8049
Tb927.5.3280	hypothetical protein, conserved	0	0.254942	1.35027e-05	17.8019
Tb927.6.4100	hypothetical protein, conserved	0	0.191498	1.45536e-06	17.7923
Tb927.10.12870	hypothetical protein, conserved	0	0.380447	0.00371121	17.7435
Tb927.3.4620	hypothetical protein, conserved	0	0.205435	5.92231e-07	17.6561
Tb927.6.4550	hypothetical protein, conserved	0	0.239771	1.27511e-05	17.6547
Tb11.02.3520	hypothetical protein, conserved	0	0.260032	1.07747e-05	17.6149
Tb11.01.4480	hypothetical protein, conserved	0	0.208743	3.04668e-06	17.6112
Tb927.8.1210	hypothetical protein, conserved	0	0.41665	0.00348255	17.5424
Tb927.7.810	hypothetical protein, conserved	0	0.0484352	1.73483e-06	17.5091
Tb11.01.7050	hypothetical protein, conserved	0	0.30164	0.000268235	17.5037
Tb09.160.2960	hypothetical protein, conserved	0	0.26255	0.000445436	17.4587
Tb927.10.10990	hypothetical protein, conserved ,predicted WD40 repeat protein	0	0.250664	6.17236e-05	17.2771
Tb927.6.1910	hypothetical protein, conserved	0	0.324428	0.00477257	17.2186
Tb927.10.5390	hypothetical protein, conserved	0	0.33541	0.000454715	17.1142
Tb927.10.5450	hypothetical protein, conserved	0	0.227159	6.76975e-06	17.023
Tb09.211.4810	hypothetical protein, conserved	0	0.40044	0.00410737	17.0073
Tb927.1.3290	hypothetical protein, conserved	0	0.321045	0.000497394	16.9017
Tb11.02.3330	hypothetical protein, conserved	0	0.311758	0.00102648	16.7476
Tb11.02.4970	hypothetical protein, conserved	0	0.386942	0.0092602	16.7049
Tb927.10.14230	hypothetical protein, conserved	0	0.180903	2.95099e-07	16.5502
Tb09.160.4710	hypothetical protein, conserved	0	0.259713	0.00366727	16.5176
Tb927.4.710	hypothetical protein, conserved	0	0.142496	1.08521e-06	16.4722
Tb927.10.5880	Proteophosphoglycan, putative	0	0.193743	1.07872e-06	16.3885
Tb927.5.1890	hypothetical protein, conserved	0	0.279533	8.77455e-05	16.113
Tb11.01.0820	hypothetical protein, conserved	0	0.182954	1.31273e-07	16.0965
Tb927.10.570	hypothetical protein, conserved	0	0.397944	0.00432375	16.096
Tb11.01.3730	hypothetical protein, conserved	0	0.347437	0.00106099	16.0862
Tb927.10.2650	hypothetical protein, conserved	0	0.275464	2.61249e-05	15.9434
Tb927.7.2120	hypothetical protein, conserved	0	0.203992	1.17627e-05	15.8921
Tb927.4.4400	hypothetical protein, conserved	0	0.253141	1.48473e-05	15.8353
Tb927.5.3290	hypothetical protein, conserved	0	0.177813	3.56385e-07	15.7486
Tb11.01.5270	hypothetical protein, conserved	0	0.290071	0.0084452	15.5835
Tb927.1.750	hypothetical protein, conserved	0	0.398026	0.0029062	15.5649
Tb927.8.610	hypothetical protein, conserved	0	0.316925	0.000512039	15.5291
Tb927.10.11880	hypothetical protein, conserved	0	0.397438	0.00530452	15.5283
Tb927.3.5160	hypothetical protein, conserved	0	0.186048	0.000125002	15.5055
Tb927.8.2390	hypothetical protein, conserved	0	0.368596	0.00195965	15.4899
Tb927.10.11110	hypothetical protein, conserved	0	0.263427	0.000147299	15.481
Tb927.10.15550	hypothetical protein, conserved	0	0.206009	2.88521e-06	15.4522
Tb927.4.4180	hypothetical protein, conserved	0	0.305981	0.00142368	15.3719
Tb09.160.5330	hypothetical protein	0	0.313135	0.00376732	15.3533
Tb927.10.11140	hypothetical protein, conserved	0	0.347122	0.000874788	15.35
Tb11.01.3720	hypothetical protein	0	0.372007	0.00486226	15.3291
Tb927.2.4050	hypothetical protein, conserved	0	0.171039	1.2717e-08	15.269
Tb11.01.4220	hypothetical protein, conserved	0	0.392467	0.00697997	15.1747
Tb927.3.1190	hypothetical protein, conserved	0	0.31374	0.000261505	15.1674
Tb927.8.3700	hypothetical protein, conserved	0	0.284729	9.11953e-05	15.0541
Tb11.02.1410	hypothetical protein, conserved	0	0.24925	1.82593e-05	15.0266
Tb927.7.5440	hypothetical protein, conserved	0	0.239195	3.73062e-06	14.9816
Tb927.5.1400	hypothetical protein	0	0.139349	5.61587e-06	14.8987
Tb927.3.1660	hypothetical protein, conserved	0	0.345761	0.000926658	14.8903
Tb927.7.6790	hypothetical protein, conserved	0	0.332538	0.00582346	14.8075
Tb11.01.0690	hypothetical protein, conserved	0	0.29135	0.000280573	14.7562
Tb927.7.7100	hypothetical protein	0	0.252888	0.00189959	14.632
Tb11.02.3880	hypothetical protein, conserved	0	0.337763	0.000921546	14.5893
Tb927.4.4880	hypothetical protein, conserved	0	0.163008	6.07167e-09	14.4933
Tb927.10.12950	hypothetical protein, conserved	0	0.263512	5.46053e-05	14.4899
Tb11.02.1540	hypothetical protein, conserved	0	0.155971	0.00965243	14.4005
Tb927.4.4570	hypothetical protein, conserved	0	0.326815	0.00224698	14.3315
Tb927.8.6140	hypothetical protein, conserved	0	0.27363	0.000216059	14.3237
Tb09.211.2010	hypothetical protein, conserved	0	0.321569	0.00366139	14.2759
Tb09.160.3220	hypothetical protein, conserved	0	0.269332	5.37979e-05	14.2404
Tb927.2.2580	hypothetical protein, conserved	0	0.387044	0.00713313	14.2348
Tb927.6.890	hypothetical protein, conserved	0	0.359661	0.00693904	14.1386
Tb09.160.4870	hypothetical protein, conserved	0	0.270919	2.77716e-05	14.1378
Tb927.7.2170	hypothetical protein, conserved	0	0.221737	5.23431e-07	14.1157
Tb927.5.2510	hypothetical protein, conserved	0	0.405639	0.00899165	14.1028
Tb927.2.4520	hypothetical protein, conserved	0	0.311569	0.00189515	14.0961
Tb927.3.2730	hypothetical protein, conserved	0	0.418344	0.00916673	14.0797
Tb927.1.1840	hypothetical protein, conserved	0	0.0964144	5.00351e-08	13.9441
Tb927.5.4470	hypothetical protein, conserved	0	0.282819	0.000124453	13.9145
Tb11.02.3470	formin, putative ,formin-like protein	0	0.118036	1.17349e-09	13.8882
Tb11.01.5970	hypothetical protein, conserved	0	0.198373	0.0013749	13.8801
Tb927.8.6940	hypothetical protein, conserved	0	0.372778	0.00210937	13.8581
Tb11.01.3470	hypothetical protein, conserved	0	0.0838535	0.00392174	13.7438
Tb927.5.1420	hypothetical protein	0	0.10568	7.94985e-09	13.7295
Tb11.01.4400	hypothetical protein	0	0.233483	1.73537e-05	13.711
Tb09.211.1620	hypothetical protein, conserved	0	0.306929	8.32691e-05	13.6906
Tb09.211.1910	hypothetical protein, conserved	0	0.280586	0.00576591	13.6747
Tb927.6.3090	hypothetical protein, conserved	0	0.152425	1.82904e-05	13.663
Tb927.10.970	hypothetical protein, conserved	0	0.36948	0.00181047	13.6528
Tb09.211.3350	hypothetical protein, conserved	0	0.368547	0.00309536	13.6472
Tb927.10.9700	hypothetical protein, conserved ,predicted C2 domain protein	0	0.370697	0.00618176	13.6471
Tb927.7.5280	hypothetical protein, conserved	0	0.353834	0.00143161	13.647
Tb927.1.4280	hypothetical protein, conserved	0	0.322206	0.00744566	13.619
Tb927.4.4480	hypothetical protein, conserved	0	0.380273	0.00580084	13.5767
Tb927.7.4370	hypothetical protein, conserved	0	0.132921	1.77669e-11	13.57
Tb927.4.3120	hypothetical protein, conserved	0	0.191906	1.87793e-05	13.5347
Tb927.6.1920	hypothetical protein, conserved	0	0.315569	0.00253105	13.5312
Tb11.01.2810	hypothetical protein, conserved	0	0.23381	8.62688e-06	13.4972
Tb927.5.3590	hypothetical protein, conserved	0	0.372612	0.00333258	13.4966
Tb927.1.1820	hypothetical protein, conserved	0	0.377474	0.00461114	13.4894
Tb927.8.4560	hypothetical protein, conserved	0	0.334227	0.000920397	13.4196
Tb09.211.4440	hypothetical protein, conserved	0	0.255663	1.31338e-05	13.4042
Tb11.01.7040	hypothetical protein	0	0.155148	2.11125e-05	13.3816
Tb927.6.650	hypothetical protein, conserved	0	0.391222	0.00305391	13.3778
Tb927.4.4550	hypothetical protein, conserved	0	0.3686	0.00974652	13.3033
Tb11.01.3670	hypothetical protein, conserved	0	0.280796	0.0009949	13.2785
Tb927.4.5380	hypothetical protein, conserved	0	0.355804	0.00114962	13.2674
Tb927.10.4170	hypothetical protein, conserved	0	0.213797	3.38875e-05	13.2273
Tb927.5.2890	hypothetical protein, conserved	0	0.283419	4.41334e-05	13.2173
Tb11.01.6200	hypothetical protein, conserved	0	0.382753	0.00269223	13.1791
Tb927.4.590	hypothetical protein, conserved	0	0.383545	0.00475211	13.1349
Tb927.8.4310	hypothetical protein, conserved	0	0.371928	0.00911811	13.1096
Tb927.1.1600	hypothetical protein, conserved	0	0.193862	8.13891e-07	13.0951
Tb927.8.780	hypothetical protein, conserved	0	0.364455	0.00940523	13.044
Tb11.01.7095	hypothetical protein	0	0.0728035	0.000497394	13.0062
Tb927.10.8820	hypothetical protein, conserved	0	0.2145	7.81061e-06	12.9895
Tb927.10.4200	hypothetical protein, conserved	0	0.193574	2.67369e-06	12.9819
Tb11.02.0690	hypothetical protein, conserved	0	0.300577	0.000170416	12.9468
Tb927.4.620	hypothetical protein, conserved	0	0.379296	0.00211056	12.919
Tb927.5.1440	hypothetical protein	0	0.149257	0.00546935	12.7685
Tb927.10.1450	hypothetical protein, conserved	0	0.0443061	1.21397e-25	12.7373
Tb927.8.7850	hypothetical protein, conserved	0	0.220331	0.00013797	12.7191
Tb927.10.12720	hypothetical protein, conserved	0	0.199545	1.57975e-05	12.7074
Tb09.160.3240	hypothetical protein, conserved	0	0.220854	4.49465e-06	12.7047
Tb927.7.4130	hypothetical protein, conserved	0	0.0602757	3.34746e-06	12.7022
Tb927.2.2090	hypothetical protein	0	0.19648	1.74375e-06	12.5608
Tb927.10.13280	hypothetical protein, conserved	0	0.177262	3.98012e-09	12.4133
Tb927.6.5150	hypothetical protein, conserved	0	0.272394	1.20638e-05	12.4002
Tb11.01.5930	hypothetical protein, conserved	0	0.261713	9.4359e-06	12.3689
Tb927.5.4520	hypothetical protein, conserved	0	0.276007	0.000436395	12.3445
Tb927.8.860	hypothetical protein, conserved	0	0.168539	0.00901494	12.3253
Tb927.7.3560	hypothetical protein, conserved	0	0.259722	0.00126024	12.2768
Tb927.7.2090	hypothetical protein, conserved	0	0.189824	1.88211e-05	12.1905
Tb927.10.11090	hypothetical protein, conserved	0	0.273752	0.000336931	12.1647
Tb927.5.2480	hypothetical protein, conserved	0	0.190094	0.00282694	12.0959
Tb927.7.2230	hypothetical protein, conserved	0	0.189097	6.89062e-05	12.05
Tb927.10.12520	hypothetical protein, conserved	0	0.407136	0.00904546	12.0216
Tb927.8.3520	hypothetical protein, conserved	0	0.298642	0.000551054	11.9094
Tb927.8.7760	hypothetical protein, conserved	0	0.34563	0.00402272	11.9022
Tb927.2.5870	hypothetical protein, conserved	0	0.236327	7.98627e-07	11.8897
Tb927.10.9690	hypothetical protein, conserved ,predicted C2 domain protein	0	0.278738	0.000341433	11.8715
Tb927.7.500	hypothetical protein, conserved	0	0.131701	0.000142387	11.8657
Tb927.1.4480	hypothetical protein, conserved	0	0.190272	0.00137113	11.8423
Tb927.7.5660	hypothetical protein, conserved	0	0.239614	0.000887671	11.764
Tb927.10.5420	hypothetical protein, conserved	0	0.381308	0.00736418	11.7543
Tb927.8.1050	hypothetical protein, conserved	0	0.271086	7.07462e-05	11.7415
Tb927.5.150	hypothetical protein, conserved	0	0.255255	0.00245138	11.6783
Tb927.8.4200	hypothetical protein, conserved	0	0.241712	2.73075e-05	11.611
Tb927.8.540	hypothetical protein, conserved	0	0.258881	1.00959e-05	11.5863
Tb11.02.2100	hypothetical protein, conserved	0	0.344583	0.000910148	11.5819
Tb927.5.2330	hypothetical protein, conserved	0	0.267796	9.94517e-06	11.5096
Tb09.211.1800	hypothetical protein, conserved	0	0.170607	1.73903e-06	11.4967
Tb927.10.15660	hypothetical protein, conserved	0	0.24309	5.97248e-05	11.4449
Tb11.47.0011	hypothetical protein, conserved	0	0.0901843	2.38173e-15	11.3813
Tb11.01.6570	hypothetical protein, conserved	0	0.330441	0.00200619	11.3525
Tb11.01.8050	hypothetical protein, conserved	0	0.36941	0.005489	11.3421
Tb927.6.1480	hypothetical protein, conserved	0	0.226502	8.84345e-07	11.2414
Tb927.10.13070	hypothetical protein, conserved	0	0.228856	1.16031e-05	11.2287
Tb927.10.3970	hypothetical protein, conserved	0	0.172075	0.00356236	11.2275
Tb927.5.4570	hypothetical protein, conserved	0	0.437219	0.00674843	11.2246
Tb927.4.2750	hypothetical protein, conserved	0	0.243477	0.00565036	11.214
Tb927.10.5850	hypothetical protein, conserved	0	0.17301	4.45394e-09	11.1209
Tb927.10.3820	hypothetical protein, conserved	0	0.270833	7.54404e-05	11.1113
Tb927.2.1250	hypothetical protein	0	0.139687	4.08644e-05	11.0385
Tb927.6.3950	hypothetical protein, conserved	0	0.377224	0.00740642	11.0083
Tb927.8.7950	hypothetical protein, conserved	0	0.269718	2.66455e-05	10.9921
Tb927.10.3960	hypothetical protein, conserved	0	0.272141	0.00911811	10.92
Tb927.8.5080	hypothetical protein, conserved	0	0.23506	7.8068e-05	10.8439
Tb927.8.4360	hypothetical protein, conserved	0	0.201987	0.00668811	10.8235
Tb11.01.5240	hypothetical protein, conserved	0	0.395887	0.00282359	10.7882
Tb11.01.3290	hypothetical protein, conserved	0	0.355977	0.0013568	10.776
Tb927.7.7320	hypothetical protein, conserved	0	0.21817	1.1351e-05	10.7226
Tb927.8.5940	hypothetical protein, conserved	0	0.280729	0.000519434	10.7157
Tb927.8.6600	hypothetical protein, conserved	0	0.196661	5.21066e-05	10.6642
Tb927.2.5860	hypothetical protein, conserved	0	0.283819	0.00670753	10.6007
Tb09.211.4280	hypothetical protein, conserved	0	0.275758	0.00176447	10.4708
Tb927.3.5220	hypothetical protein, conserved	0	0.201506	1.36546e-06	10.418
Tb927.2.900	hypothetical protein	0	0.165489	0.000169975	10.4125
Tb927.7.2200	hypothetical protein, conserved	0	0.286062	0.000691318	10.3307
Tb927.3.1860	hypothetical protein, conserved	0	0.241968	5.52801e-05	10.2823
Tb927.3.5620	hypothetical protein, conserved	0	0.317147	0.000179083	10.2667
Tb927.4.120	hypothetical protein	0	0.170464	0.00243799	10.2345
Tb927.2.650	hypothetical protein	0	0.171558	0.000242575	10.017
Tb927.6.2900	hypothetical protein, conserved ,SAM domain and HD domain-containing protein 1 ,dendritic cell-derived IFNG-induced protein	0	0.226412	6.10977e-06	9.98898
Tb927.2.2340	hypothetical protein, conserved	0	0.198842	7.27218e-05	9.96549
Tb927.10.11250	hypothetical protein, conserved	0	0.149339	1.48775e-09	9.94145
Tb09.244.2170	hypothetical protein, conserved	0	0.154782	0.000496961	9.78079
Tb927.10.12120	hypothetical protein, conserved	0	0.206914	1.8606e-07	9.68526
Tb927.5.3330	hypothetical protein, conserved	0	0.128783	3.80851e-12	9.6795
Tb927.10.2950	hypothetical protein, conserved	0	0.30984	0.00961553	9.59444
Tb927.3.5020	hypothetical protein, conserved	0	0.261573	7.8439e-06	9.55192
Tb927.3.4610	hypothetical protein, conserved	0	0.178009	3.8492e-05	9.47193
Tb927.1.3560	hypothetical protein, conserved	0	0.415026	0.00879846	9.46853
Tb11.02.0880	hypothetical protein, conserved	0	0.305994	7.87379e-05	9.45372
Tb11.01.6550	hypothetical protein, conserved	0	0.207482	3.67939e-06	9.40059
Tb927.8.6980	hypothetical protein, conserved	0	0.290251	0.000341433	9.36957
Tb927.8.4240	hypothetical protein, conserved	0	0.265647	7.49416e-05	9.31788
Tb927.10.15290	hypothetical protein, conserved	0	0.251086	1.82297e-05	9.21737
Tb927.5.1760	hypothetical protein, conserved	0	0.30107	0.000116744	9.18504
Tb927.4.3800	hypothetical protein, conserved	0	0.284088	0.000463129	9.16561
Tb927.10.14920	hypothetical protein, conserved	0	0.234408	0.000490002	9.15835
Tb11.02.4280	hypothetical protein, conserved	0	0.28975	6.56483e-05	9.08557
Tb11.02.0930	hypothetical protein, conserved	0	0.227487	2.61265e-05	9.06685
Tb927.2.2650	hypothetical protein, conserved	0	0.350726	0.000712626	8.98678
Tb927.10.11720	hypothetical protein, conserved	0	0.350119	0.00281248	8.95476
Tb927.7.5320	hypothetical protein, conserved	0	0.28318	0.000247492	8.92017
Tb927.5.1850	hypothetical protein, conserved	0	0.0690539	7.96398e-11	8.89877
Tb927.6.3220	hypothetical protein, conserved	0	0.407583	0.00524084	8.77955
Tb927.10.8390	hypothetical protein, conserved	0	0.273959	1.25672e-05	8.77323
Tb927.4.310	hypothetical protein, conserved	0	0.158555	4.28642e-08	8.70075
Tb11.01.4370	hypothetical protein, conserved	0	0.301164	0.005489	8.64927
Tb927.8.5760	hypothetical protein, conserved	0	0.323125	0.000263735	8.55983
Tb927.10.5260	hypothetical protein, conserved	0	0.252314	1.50849e-05	8.53674
Tb927.7.720	hypothetical protein, conserved	0	0.361689	0.00698446	8.50817
Tb927.10.840	hypothetical protein, conserved	0	0.14191	5.01383e-05	8.49542
Tb927.3.1420	hypothetical protein, conserved	0	0.303671	0.000157743	8.4933
Tb927.10.8000	hypothetical protein, conserved	0	0.306759	0.000136258	8.17272
Tb927.8.3850	hypothetical protein, conserved	0	0.314214	0.00838938	8.13273
Tb11.01.2730	hypothetical protein, conserved	0	0.0904076	2.12099e-15	8.128
Tb927.8.1360	hypothetical protein, conserved	0	0.363596	0.00119165	8.11495
Tb927.10.12030	hypothetical protein, conserved	0	0.249522	9.49875e-05	7.80562
Tb927.6.2730	hypothetical protein, conserved	0	0.373311	0.00278391	7.73286
Tb09.160.1220	hypothetical protein, conserved	0	0.281407	0.00756791	7.71961
Tb927.10.9330	hypothetical protein, conserved	0	0.132312	0.00268161	7.68433
Tb927.7.1420	hypothetical protein, conserved	0	0.204636	1.67765e-07	7.56863
Tb927.7.2180	hypothetical protein, conserved	0	0.288301	0.000776354	7.5576
Tb11.01.0220	hypothetical protein, conserved	0	0.245965	0.000168627	7.54542
Tb927.10.15310	hypothetical protein, conserved	0	0.247431	0.000728284	7.53409
Tb927.1.880	hypothetical protein, conserved	0	0.306593	9.51134e-05	7.51381
Tb11.01.5120	hypothetical protein, conserved	0	0.335933	0.000360191	7.51203
Tb927.3.5080	hypothetical protein, conserved	0	0.240589	2.41203e-05	7.48682
Tb927.3.1680	hypothetical protein, conserved	0	0.33083	0.000440159	7.43012
Tb927.8.5850	hypothetical protein, conserved	0	0.274433	0.000174295	7.36275
Tb927.7.4450	hypothetical protein, conserved	0	0.363572	0.00179465	7.30216
Tb927.5.2710	hypothetical protein, conserved	0	0.143677	9.22479e-07	7.26223
Tb11.01.5770	hypothetical protein, conserved	0	0.305682	0.000786809	7.19062
Tb11.02.4320	hypothetical protein, conserved	0	0.378371	0.00196281	7.17238
Tb927.7.7400	hypothetical protein, conserved	0	0.15466	2.86991e-10	7.13821
Tb927.6.2870	hypothetical protein, conserved	0	0.275654	0.0031266	7.13258
Tb927.10.11150	hypothetical protein, conserved	0	0.31459	0.00136445	7.11761
Tb927.8.5110	hypothetical protein, conserved	0	0.152015	2.95874e-09	7.11562
Tb11.01.4740	hypothetical protein, conserved	0	0.256594	2.76964e-05	7.03272
Tb927.8.4960	hypothetical protein, conserved	0	0.349625	0.00155822	6.89422
Tb927.5.2620	hypothetical protein, conserved	0	0.335016	0.00107548	6.89173
Tb927.7.2330	hypothetical protein, conserved	0	0.13634	0.00174687	6.87086
Tb927.10.15330	hypothetical protein, conserved	0	0.308954	0.00415635	6.78515
Tb927.5.1770	hypothetical protein, conserved	0	0.0969399	1.03916e-13	6.73527
Tb11.02.5580	hypothetical protein, conserved	0	0.274217	7.20063e-05	6.71483
Tb11.02.0357	hypothetical protein, conserved	0	0.206896	8.93233e-05	6.70576
Tb927.3.2490	hypothetical protein, conserved	0	0.405405	0.00412483	6.66518
Tb11.02.1690	hypothetical protein, conserved	0	0.283673	0.000118215	6.66176
Tb927.10.8810	hypothetical protein, conserved	0	0.363891	0.00616731	6.27058
Tb927.3.1910	hypothetical protein, conserved	0	0.246327	0.00425704	6.25861
Tb927.10.5190	hypothetical protein	0	0.255307	0.000216059	6.25083
Tb927.8.8340	hypothetical protein, conserved	0	0.307896	0.00125429	6.2477
Tb927.8.940	hypothetical protein, conserved	0	0.221838	2.02695e-07	6.23871
Tb927.8.960	hypothetical protein, conserved	0	0.214731	1.11937e-07	6.21552
Tb927.7.6920	hypothetical protein, conserved	0	0.318405	0.00482026	6.18164
Tb927.10.15280	hypothetical protein, conserved	0	0.415516	0.00835348	6.15937
Tb927.10.11580	hypothetical protein, conserved ,predicted WD40 repeat protein	0	0.433227	0.00972181	6.07608
Tb927.1.2980	hypothetical protein, conserved	0	0.418964	0.0083304	6.01367
Tb927.10.3400	hypothetical protein, conserved	0	0.0793042	2.04186e-11	5.97656
Tb11.01.2430	hypothetical protein, conserved	0	0.136078	0.00200619	5.94443
Tb927.3.1900	hypothetical protein, conserved	0	0.0971482	4.23591e-13	5.85778
Tb927.7.2110	hypothetical protein, conserved	0	0.186698	0.00011102	5.84172
Tb11.v4.0001	hypothetical protein	0	0.179774	4.46863e-05	5.76078
Tb927.8.7780	hypothetical protein, conserved	0	0.338982	0.00325244	5.7221
Tb927.10.8830	hypothetical protein, conserved	0	0.410497	0.00482543	5.72024
Tb11.02.2670	hypothetical protein, conserved	0	0.275414	2.31269e-05	5.71674
Tb927.4.1320	hypothetical protein, conserved	0	0.36038	0.00616731	5.67733
Tb11.02.0010	hypothetical protein, conserved	0	0.372178	0.00409786	5.65517
Tb927.8.880	hypothetical protein	0	0.39267	0.00656523	5.51174
Tb11.01.2310	hypothetical protein, conserved	0	0.291167	0.000358942	5.49973
Tb927.4.180	hypothetical protein	0	0.0864443	0.00263707	5.45736
Tb09.160.0650	hypothetical protein, conserved	0	0.24266	0.000697017	5.44792
Tb927.10.13150	hypothetical protein, conserved	0	0.367835	0.00588871	5.44312
Tb11.01.4310	hypothetical protein, conserved	0	0.283216	6.13976e-05	5.36635
Tb927.4.4760	hypothetical protein, conserved	0	0.307091	0.000315461	5.35662
Tb11.01.4460	hypothetical protein, conserved	0	0.254489	0.000536691	5.33983
Tb11.52.0008	hypothetical protein, conserved	0	0.0847602	6.59684e-15	5.29135
Tb927.10.3310	hypothetical protein, conserved	0	0.265743	9.81217e-05	5.2616
Tb927.10.15700	hypothetical protein, conserved	0	0.0321664	1.89071e-20	5.19003
Tb927.4.2070	antigenic protein, putative	0	0.0391743	3.20345e-10	5.06788
Tb927.2.5760	hypothetical protein, conserved	0	0.327749	0.00240944	5.03752
Tb927.10.6790	hypothetical protein, conserved	0	0.362062	0.00198325	5.02735
Tb927.4.1530	hypothetical protein, conserved	0	0.260398	3.63242e-05	4.9731
Tb927.10.15750	hypothetical protein, conserved	0	0.0599474	8.39869e-05	4.95293
Tb927.4.4190	hypothetical protein, conserved	0	0.273705	0.00587821	4.9496
Tb927.10.15240	hypothetical protein, conserved	0	0.370015	0.0029062	4.78699
Tb927.10.10050	hypothetical protein, conserved	0	0.154402	0.00161474	4.77755
Tb09.211.2880	hypothetical protein, conserved	0	0.38994	0.00507557	4.7553
Tb11.02.1660	hypothetical protein, conserved	0	0.167683	0.000574235	4.71789
Tb927.5.3230	hypothetical protein, conserved	0	0.26351	8.45066e-06	4.71084
Tb11.02.1470	hypothetical protein, conserved	0	0.375044	0.0065713	4.68954
Tb11.47.0026	hypothetical protein, conserved	0	0.343017	0.000951079	4.68687
Tb927.3.1800	hypothetical protein, conserved	0	0.315978	0.000181282	4.67217
Tb09.211.3890	hypothetical protein, conserved	0	0.414311	0.00736418	4.66897
Tb11.47.0032	hypothetical protein, conserved	0	0.40304	0.00796359	4.62798
Tb11.01.6380	hypothetical protein, conserved	0	0.325804	0.000311754	4.58184
Tb927.10.12820	hypothetical protein, conserved	0	0.239695	1.19908e-06	4.54966
Tb927.8.3710	hypothetical protein, conserved	0	0.272284	0.000478404	4.51826
Tb927.8.3980	hypothetical protein, conserved	0	0.25336	5.97248e-05	4.32707
Tb927.10.2190	hypothetical protein, conserved	0	0.283866	8.69676e-05	4.30851
Tb927.4.4390	hypothetical protein	0	0.240067	6.63083e-05	4.28729
Tb09.211.1830	hypothetical protein, conserved	0	0.315349	0.000443509	4.23288
Tb927.1.1500	hypothetical protein, conserved	0	0.131585	0.00436639	4.20292
Tb927.7.5500	hypothetical protein, conserved	0	0.296172	0.000220316	4.17601
Tb927.7.5210	hypothetical protein, conserved	0	0.304963	9.62225e-05	4.12412
Tb927.2.4580	hypothetical protein, conserved	0	0.274311	0.001546	3.99661
Tb927.7.6090	hypothetical protein, conserved	0	0.361097	0.000756041	3.95025
Tb927.1.1910	hypothetical protein, conserved	0	0.382418	0.00431641	3.92239
Tb927.3.5400	hypothetical protein, conserved	0	0.253817	0.000399952	3.87405
Tb11.01.8010	hypothetical protein, conserved	0	0.25775	5.97248e-05	3.85955
Tb927.10.9970	hypothetical protein, conserved	0	0.301497	0.000145535	3.85798
Tb927.7.4600	hypothetical protein, conserved	0	0.370078	0.00618479	3.84421
Tb11.01.5850	hypothetical protein, conserved	0	0.262914	7.41149e-05	3.77642
Tb927.5.2750	hypothetical protein, conserved	0	0.274511	0.00024252	3.7455
Tb927.7.7050	hypothetical protein, conserved	0	0.328389	0.000586259	3.72844
Tb927.7.4220	hypothetical protein, conserved	0	0.393417	0.0047602	3.71647
Tb09.211.1870	hypothetical protein, conserved	0	0.379715	0.00569327	3.68085
Tb927.10.12910	hypothetical protein, conserved	0	0.363353	0.00412207	3.67654
Tb927.10.8910	hypothetical protein, conserved	0	0.345453	0.000894901	3.56292
Tb11.01.6490	hypothetical protein, conserved	0	0.328322	0.00144754	3.5454
Tb927.7.7250	hypothetical protein, conserved	0	0.342801	0.000912979	3.52995
Tb927.7.6690	hypothetical protein	0	0.182158	0.00235498	3.52252
Tb09.160.1250	hypothetical protein, conserved	0	0.386459	0.00250218	3.50848
Tb927.8.790	hypothetical protein, conserved	0	0.32031	0.00309909	3.46542
Tb11.01.2250	hypothetical protein, conserved	0	0.287836	0.000125741	3.44872
Tb11.01.7250	hypothetical protein, conserved	0	0.358928	0.00422107	3.43588
Tb927.4.4500	hypothetical protein, conserved	0	0.336982	0.00121524	3.42084
Tb927.10.15790	hypothetical protein, conserved	0	0.303349	0.00384832	3.4208
Tb11.02.4690	hypothetical protein	0	0.097401	0.000503563	3.40937
Tb927.8.5650	hypothetical protein, conserved	0	0.303573	0.000383046	3.36274
Tb927.5.310	hypothetical protein	0	0.248475	1.13654e-05	3.35596
Tb927.4.3060	hypothetical protein, conserved	0	0.339595	0.00128612	3.33864
Tb927.8.1460	hypothetical protein, conserved	0	0.359152	0.00818998	3.33682
Tb927.7.3330	hypothetical protein, conserved	0	0.0282543	1.53666e-33	3.32749
Tb927.4.1980	hypothetical protein, conserved	0	0.38448	0.00668811	3.32367
Tb927.1.4450	hypothetical protein, conserved	0	0.408374	0.00770635	3.32233
Tb927.7.650	hypothetical protein, conserved	0	0.382654	0.00488243	3.26952
Tb927.3.3550	hypothetical protein, conserved	0	0.419665	0.00961553	3.21791
Tb927.4.3170	hypothetical protein, conserved	0	0.358706	0.00325607	3.20441
Tb09.160.4550	hypothetical protein, conserved	0	0.230796	4.58007e-06	3.16754
Tb11.01.4330	hypothetical protein, conserved	0	0.346107	0.00283178	3.15559
Tb927.3.2050	hypothetical protein, conserved	0	0.228774	0.00149485	3.15301
Tb927.10.9670	hypothetical protein, conserved	0	0.3258	0.00155627	3.12336
Tb927.7.2410	hypothetical protein, conserved	0	0.3984	0.00972181	3.10735
Tb927.2.4460	hypothetical protein, conserved	0	0.203564	0.000157418	3.10279
Tb11.02.3500	hypothetical protein, conserved	0	0.365802	0.0030942	3.10123
Tb927.5.3880	hypothetical protein, conserved	0	0.318547	0.00475211	3.09841
Tb11.02.0020	hypothetical protein, conserved	0	0.378056	0.00236442	3.02848
Tb927.6.3180	hypothetical protein, conserved	0	0.327035	0.00090887	3.02611
Tb927.6.3280	cyclosome subunit 1, putative	0	0.369856	0.00208607	3.01532
Tb927.7.6590	hypothetical protein, conserved	0	0.112146	2.33583e-10	3.01456
Tb11.03.0740	hypothetical protein, conserved	0	0.348388	0.00264609	3.00001
Tb927.8.6260	hypothetical protein, conserved	0	0.268756	0.000222041	2.87633
Tb927.10.9000	hypothetical protein, conserved	0	0.421743	0.00618479	2.83521
Tb09.160.0750	hypothetical protein, conserved	0	0.347487	0.00215524	2.79652
Tb09.211.3720	hypothetical protein, conserved	0	0.265014	0.00103705	2.75858
Tb09.211.2060	hypothetical protein	0	0.207598	0.000533303	2.75777
Tb927.8.7490	hypothetical protein, conserved	0	0.429356	0.00767127	2.71633
Tb927.8.2590	hypothetical protein, conserved	0	0.357338	0.00917186	2.70224
Tb927.10.15190	hypothetical protein, conserved	0	0.305642	0.00197521	2.66043
Tb11.02.2980	hypothetical protein, conserved	0	0.365878	0.00646753	2.58029
Tb11.01.2690	hypothetical protein, conserved	0	0.36684	0.00626778	2.55353
Tb927.7.1570	hypothetical protein, conserved	0	0.41643	0.00837009	2.51191
Tb11.02.0110	hypothetical protein, conserved	0	0.247198	6.65338e-06	2.44078
Tb09.160.1010	hypothetical protein, conserved	0	0.323726	0.00280916	2.43063
Tb927.10.3800	hypothetical protein, conserved ,predicted RING finger protein	0	0.348207	0.00361128	2.35751
Tb927.5.2530	hypothetical protein, conserved	0	0.317019	0.000399952	2.35245
Tb927.6.1740	hypothetical protein, conserved	0	0.378671	0.00654508	2.30589
Tb927.7.2240	hypothetical protein, conserved	0	0.245809	3.02938e-06	2.26292
Tb927.7.4530	hypothetical protein, conserved	0	0.375008	0.00493779	2.23197
Tb927.5.2800	hypothetical protein, conserved	0	0.352968	0.00155602	2.22597
Tb927.10.9280	hypothetical protein, conserved	0	0.401755	0.00605535	2.16727
Tb927.10.5530	hypothetical protein, conserved	0	0.381521	0.0084452	2.14304
Tb927.8.3230	hypothetical protein, conserved	0	0.393479	0.00769523	2.14217
Tb11.02.1630	hypothetical protein, conserved ,predicted C2 domain protein	0	0.333384	0.000726463	2.13348
Tb11.01.1540	hypothetical protein, conserved	0	0.378627	0.00267162	2.06728
Tb927.7.2160	hypothetical protein, conserved	0	0.185014	1.64423e-06	2.03031
Tb11.22.0002	hypothetical protein, conserved	0	0.375159	0.00558254	1.83523
Tb927.7.6580	hypothetical protein	0	0.150167	6.4666e-09	1.81063
Tb927.4.5070	hypothetical protein, conserved	0	0.282615	0.000750328	1.77761
Tb09.v4.0014	#N/A	0	0.223172	0.00146639	1.69934
Tb927.5.3200	hypothetical protein, conserved	0	0.282949	0.00108985	1.57984
Tb09.211.3940	hypothetical protein, conserved	0	0.334759	0.000962191	1.57415
Tb927.4.2430	hypothetical protein, conserved	0	0.283854	0.000336103	1.54618
Tb927.7.2640	hypothetical protein, conserved	0	0.320547	0.00685499	1.48802
Tb927.6.3840	reticulon domain protein	0	0.199943	0.00133724	1.39486
Tb09.160.4660	hypothetical protein, conserved	0	0.406769	0.00798813	1.30614
Tb927.8.3540	hypothetical protein, conserved	0	0.124033	3.71619e-11	1.30348
Tb927.3.2720	hypothetical protein	0	0.356879	0.00520104	1.1714
Tb927.2.4000	hypothetical protein, conserved	0	0.340258	0.00274749	1.14748
Tb927.5.2000	hypothetical protein	0	0.152072	0.000189574	1.08526
Tb927.10.8940	hypothetical protein, conserved	0	0.125563	3.79367e-06	1
Tb11.01.5680	hypothetical protein, conserved	0	0.181615	0.000461524	1
Tb927.7.2650	hypothetical protein, conserved	0	0.182697	2.3606e-07	1
Tb927.7.4470	hypothetical protein, conserved	0	0.206425	9.14792e-07	1
Tb927.3.4270	hypothetical protein, conserved	0	0.267767	2.98545e-05	1
Tb927.4.2740	hypothetical protein, conserved	0	0.340639	0.000658789	1
Tb927.7.4520	hypothetical protein, conserved	0	0.398926	0.0024621	1
Tb09.211.3330	cystathione gamma lyase, putative	Amino acid metabolism	0.259183	2.18095e-05	9.8084
Tb11.55.0024	hypothetical protein, conserved	Amino acid metabolism	0.30257	0.000184283	9.22641
Tb11.18.0006	carnitine O-acetyltransferase, putative	Amino acid metabolism	0.257308	1.01765e-05	6.93219
Tb927.4.360	hypothetical protein, conserved	Amino acid metabolism	0.269282	4.81113e-05	6.90117
Tb927.5.3800	glutamine hydrolysing (not ammonia-dependent) carbomoyl phosphate synthase, putative	Amino acid metabolism	0.0594956	4.6751e-21	2.97873
Tb927.10.3560	arginine N-methyltransferase, putative	Arginine methylation	0.181447	5.95763e-07	15.577
Tb927.10.2880	calcium channel protein, putative	Calcium	0.14961	2.44183e-08	7.05907
Tb11.01.3350	cyclin dependent kinase-binding protein, putative	Cell cycle	0.248004	2.11125e-05	20.6174
Tb11.02.0310	cell division cycle 45 (CDC45), putative	Cell cycle	0.292778	0.000663569	18.3174
Tb927.7.1190	regulator of chromosome condensation, putative	Cell cycle	0.275193	4.67399e-05	17.5692
Tb927.7.1210	regulator of chromosome condensation, putative	Cell cycle	0.216111	0.000305264	14.2076
Tb11.01.8460	cyclin 6 ,mitotic cyclin (pers. comm. J. Mottram, Univ. of Glasgow)	Cell cycle	0.174611	1.02151e-07	8.15801
Tb927.8.6500	cell division cycle protein, putative	Cell cycle	0.386338	0.00769523	6.82471
Tb927.10.5180	TPR-repeat-containing chaperone protein DNAJ, putative	Chaperone	0.351506	0.0025622	16.242
Tb927.10.9840	chaperone protein DNAj, putative	Chaperone	0.355512	0.004444	12.0912
Tb927.7.680	chaperone protein DNAj, putative	Chaperone	0.393046	0.00903592	9.8591
Tb927.10.12640	chaperone protein DNAj, putative	Chaperone	0.3344	0.00419367	3.00912
Tb927.7.710	heat shock 70 kDa protein, putative	Chaperone	0.42394	0.00433571	1.70013
Tb927.7.5790	protein disulfide isomerase, putative	Chaperone	0.170759	4.57321e-08	1
Tb927.7.1300	protein disulfide isomerase, putative	Chaperone	0.25223	3.17673e-06	1
Tb11.01.5220	J-binding protein	Chromatin	0.269967	0.00798813	18.1675
Tb927.10.740	structural maintenance of chromosome 4, putative	Chromatin	0.144546	8.61033e-10	15.7124
Tb09.211.2970	structural maintenance of chromosome 1, putative	Chromatin	0.139417	1.16316e-09	10.73
Tb927.2.2190	histone deacetylase, putative	Chromatin	0.327688	0.00252662	10.7255
Tb927.5.3510	structural maintenance of chromosome 3 , putative	Chromatin	0.319992	0.00252755	9.54299
Tb927.8.3690	isocitrate dehydrogenase [NADP], mitochondrial precursor, putative	Citric acid cycle	0.209438	6.0731e-06	24.3872
Tb927.3.4500	fumarate hydratase, class I	Citric acid cycle	0.345068	0.00541048	15.4626
Tb927.8.6580	succinate dehydrogenase flavoprotein, putative	Citric acid cycle	0.368333	0.00600988	13.7834
Tb927.10.3650	NADH-dependent fumarate reductase, putative	Citric acid cycle	0.111572	2.33583e-10	13.7125
Tb11.47.0004	2-oxoglutarate dehydrogenase E1 component, putative	Citric acid cycle	0.291559	3.73036e-05	5.83084
Tb927.10.12700	pyruvate dehydrogenase E1 alpha subunit, putative	Citric acid cycle	0.302966	0.000535912	4.45831
Tb11.02.0290	succinyl-coA:3-ketoacid-coenzyme A transferase, mitochondrial precursor, putative	Citric acid cycle	0.37826	0.00168869	1
Tb927.2.4060	dynein intermediate chain IC 138, putative	Cytoskeleton	0.312756	0.000240764	20.7089
Tb09.160.5670	hypothetical protein, conserved ,predicted tetratricopeptide repeat protein	Cytoskeleton	0.40133	0.00329237	20.2133
Tb11.02.0860	hypothetical protein, conserved	Cytoskeleton	0.327963	0.00056382	18.8752
Tb927.6.2880	kinesin, putative	Cytoskeleton	0.20469	6.05714e-06	18.405
Tb927.4.2730	kinesin, putative	Cytoskeleton	0.301114	0.000622435	18.0793
Tb11.02.0400	kinesin, putative	Cytoskeleton	0.246892	1.81155e-05	16.5657
Tb11.03.0880	hypothetical protein, conserved ,predicted WD40 repeat protein	Cytoskeleton	0.298324	8.69676e-05	16.0177
Tb927.2.4330	PFR5	Cytoskeleton	0.181609	2.69841e-07	15.4288
Tb927.7.3000	kinesin, putative	Cytoskeleton	0.243688	0.00991586	15.3324
Tb927.3.2040	kinesin, putative	Cytoskeleton	0.188901	6.04787e-07	14.9242
Tb927.5.3030	intraflagellar transport protein IFT122, putative	Cytoskeleton	0.265163	2.26283e-05	14.7676
Tb11.02.0090	kinesin, putative ,Unc104-like kinesin, putative	Cytoskeleton	0.151521	2.0444e-10	14.6071
Tb09.160.2260	kinesin, putative ,MCAK-like kinesin, putative	Cytoskeleton	0.373885	0.00248113	14.246
Tb09.244.2560	kinesin, putative	Cytoskeleton	0.185215	3.57973e-07	14.0796
Tb927.10.15400	kinesin, putative	Cytoskeleton	0.206608	2.7321e-05	13.8178
Tb927.6.3670	paraflagellar rod component, putative	Cytoskeleton	0.333187	0.000311478	13.6775
Tb927.10.14980	intraflagellar transport protein IFT52, putative	Cytoskeleton	0.347511	0.00199439	13.4775
Tb927.8.4950	kinesin, putative	Cytoskeleton	0.0860161	9.28813e-15	13.3311
Tb11.01.3990	kinesin, putative	Cytoskeleton	0.386199	0.00829946	13.1442
Tb927.8.7840	dynein heavy chain, cytosolic, putative	Cytoskeleton	0.292716	0.00239291	13.1114
Tb927.3.5310	paraflagellar rod protein ,I2 antigen	Cytoskeleton	0.0485751	6.60491e-05	12.9525
Tb927.8.6070	basal body component ,ML protein	Cytoskeleton	0.141461	5.33963e-08	12.8949
Tb927.5.2090	kinesin, putative	Cytoskeleton	0.266335	1.6632e-05	12.0587
Tb927.2.3660	paraflagellar rod component, putative	Cytoskeleton	0.205761	1.0881e-07	11.0958
Tb927.10.14470	intraflagellar transport protein IFT140, putative	Cytoskeleton	0.291499	0.0019187	10.6604
Tb11.01.0390	dynein heavy chain, putative	Cytoskeleton	0.179031	2.2895e-05	10.1055
Tb927.2.4810	hypothetical protein, conserved	Cytoskeleton	0.240115	4.36676e-06	10.0978
Tb927.10.5350	dynein heavy chain, putative	Cytoskeleton	0.1107	2.34174e-14	9.78042
Tb927.6.870	myotubularin, putative	Cytoskeleton	0.324612	0.00496644	9.70165
Tb927.5.2950	hypothetical protein, conserved	Cytoskeleton	0.424561	0.00825909	9.57343
Tb11.01.3010	dynein heavy chain, putative	Cytoskeleton	0.140808	2.02695e-07	8.66153
Tb927.2.950	paraflagellar rod component, putative	Cytoskeleton	0.109576	6.7221e-05	8.63573
Tb11.47.0034	radial spoke protein RSP3, putative	Cytoskeleton	0.262211	2.54128e-05	8.53321
Tb927.7.920	dynein heavy chain, putative	Cytoskeleton	0.153224	8.70411e-11	8.49045
Tb927.10.8590	flagellum transition zone component	Cytoskeleton	0.388171	0.00428319	8.3233
Tb927.7.3160	dynein heavy chain, cytosolic, putative	Cytoskeleton	0.191149	2.25536e-08	8.18187
Tb927.8.3100	coronin, putative	Cytoskeleton	0.380777	0.00294752	7.52606
Tb927.4.870	dynein heavy chain, putative	Cytoskeleton	0.115844	4.29009e-10	7.45461
Tb927.3.5490	flagellar transport protein, putative	Cytoskeleton	0.324508	0.00042582	7.42884
Tb927.7.3830	kinesin K39, putative	Cytoskeleton	0.0491393	9.94517e-06	6.87919
Tb927.5.2410	kinesin, putative	Cytoskeleton	0.214492	0.00252755	6.87653
Tb927.10.1110	kinesin, putative	Cytoskeleton	0.359484	0.00423696	6.57981
Tb927.4.560	dynein heavy chain, putative	Cytoskeleton	0.110015	1.41853e-14	6.54029
Tb09.244.2600	ankyrin-repeat protein, putative	Cytoskeleton	0.320271	0.000232193	6.52632
Tb927.3.930	dynein heavy chain, putative	Cytoskeleton	0.107162	2.98299e-07	6.331
Tb09.160.1200	microtubule- associated protein	Cytoskeleton	0.168189	0.000549979	6.04707
Tb927.1.1350	kinesin heavy chain, putative	Cytoskeleton	0.234904	3.54305e-05	5.98047
Tb927.10.15250	paraflagellar rod component, putative	Cytoskeleton	0.354619	0.0009949	5.83932
Tb11.02.0030	dynein heavy chain, putative	Cytoskeleton	0.0915634	5.95787e-09	5.71219
Tb927.10.890	kinesin, putative	Cytoskeleton	0.0329944	5.34866e-22	5.38602
Tb927.2.2160	paraflagellar rod component, putative	Cytoskeleton	0.292022	0.000321539	5.27108
Tb11.47.0006	hypothetical protein, conserved	Cytoskeleton	0.291081	4.44826e-05	5.02672
Tb11.01.7880	microtubule-associated protein ,corset-associated protein 17	Cytoskeleton	0.26561	0.00248398	4.76378
Tb927.4.2080	hypothetical protein, conserved	Cytoskeleton	0.26187	7.1295e-06	4.4742
Tb927.10.2640	intraflagellar transport protein IFT81, putative	Cytoskeleton	0.370246	0.0013568	4.09407
Tb11.01.6740	Tb5.20	Cytoskeleton	0.172793	1.15536e-07	3.50935
Tb927.10.10360	microtubule-associated protein, putative	Cytoskeleton	0.226495	0.00380415	3.47855
Tb927.10.11080	paraflagellar rod protein ,I17 antigen	Cytoskeleton	0.0461073	0.00641818	3.27832
Tb11.01.0850	C-terminal motor kinesin, putative	Cytoskeleton	0.35777	0.00208607	3.12589
Tb927.4.3740	flagellar attachment zone protein	Cytoskeleton	0.135807	3.35134e-07	2.8965
Tb927.10.1170	intraflagellar transport protein IFT172, putative	Cytoskeleton	0.22028	2.96506e-05	2.64886
Tb927.7.7260	kinesin, putative	Cytoskeleton	0.400843	0.00831517	2.42049
Tb11.02.0760	dynein heavy chain, putative	Cytoskeleton	0.11376	8.77455e-05	2.40468
Tb927.4.3950	cytoskeleton-associated protein CAP5.5, putative ,cysteine peptidase, Clan CA, family C2, putative	Cytoskeleton	0.229332	6.04358e-06	2.29936
Tb927.6.3570	tubulin-tyrosine ligase-like protein, conserved	Cytoskeleton	0.302073	0.00192495	1.79788
Tb927.10.9570	paraflagellar rod component, putative	Cytoskeleton	0.155038	0.000296421	1.52724
Tb11.01.7990	myosin, putative ,myosin heavy chain, putative	Cytoskeleton_Actin	0.239256	2.16789e-05	12.7975
Tb927.8.4880	DNA polymerase alpha catalytic subunit ,DNA polymerase I	DNA synthesis, modification, repair	0.349041	0.000691513	18.8177
Tb927.6.1760	KU80 protein	DNA synthesis, modification, repair	0.393855	0.00926561	18.1149
Tb11.01.1100	helicase-like protein	DNA synthesis, modification, repair	0.257719	0.000148504	16.0947
Tb927.8.5710	recombination initiation protein NBS1, putative	DNA synthesis, modification, repair	0.258189	0.000118481	16.0834
Tb927.8.3290	DNA polymerase zeta catalytic subunit, putative	DNA synthesis, modification, repair	0.338262	0.0037931	15.5637
Tb09.211.1820	DNA polymerase epsilon catalytic subunit, putative	DNA synthesis, modification, repair	0.172342	3.55902e-09	14.4286
Tb927.7.830	telomerase-associated protein, putative	DNA synthesis, modification, repair	0.279695	2.66455e-05	14.2174
Tb11.01.7810	minichromosome maintenance (MCM) complex subunit, putative	DNA synthesis, modification, repair	0.358894	0.00235028	14.2105
Tb11.01.0870	replication factor A, 51kDa subunit, putative	DNA synthesis, modification, repair	0.392383	0.00684615	12.17
Tb927.10.6410	mismatch repair protein MSH8, putative ,mismatch repair protein	DNA synthesis, modification, repair	0.312136	0.000639071	10.5572
Tb11.01.0340	RAD50 DNA repair-like protein	DNA synthesis, modification, repair	0.0847282	2.68823e-08	8.50873
Tb11.01.3390	DNA topoisomerase II, putative	DNA synthesis, modification, repair	0.371653	0.00271275	7.69293
Tb927.4.1330	DNA topoisomerase IB, large subunit	DNA synthesis, modification, repair	0.225703	7.7046e-05	7.57642
Tb11.01.2500	SNF2 DNA repair protein, putative ,ATP-dependent helicase, putative ,SNF2 family helicase, putative	DNA synthesis, modification, repair	0.280727	7.57017e-05	4.655
Tb11.01.0050	DNA polymerase kappa, putative ,DNA polymerase IV, putative	DNA synthesis, modification, repair	0.217405	0.00388117	4.62658
Tb927.10.3550	DNA repair helicase, putative	DNA synthesis, modification, repair	0.310857	0.0029288	4.58469
Tb927.10.11020	DNA mismatch repair protein, putative ,MSH2	DNA synthesis, modification, repair	0.378605	0.00276313	4.14576
Tb11.12.0001	DNA polymerase kappa, putative	DNA synthesis, modification, repair	0.242049	0.00391945	4.1005
Tb11.01.0030	DNA polymerase kappa, putative ,DNA polymerase IV, putative	DNA synthesis, modification, repair	0.226346	0.00482543	4.07409
Tb11.12.0003	DNA polymerase kappa, putative	DNA synthesis, modification, repair	0.204634	0.000341433	3.79401
Tb927.10.1270	mismatch repair protein, putative	DNA synthesis, modification, repair	0.275772	0.000171485	3.7249
Tb11.01.0080	DNA polymerase kappa, putative ,DNA polymerase IV, putative	DNA synthesis, modification, repair	0.21726	0.00469865	3.69044
Tb927.3.5440	SNF2 DNA repair protein, putative	DNA synthesis, modification, repair	0.30562	0.000112165	3.3941
Tb11.02.3250	DNA polymerase theta, putative	DNA synthesis, modification, repair	0.365221	0.00263833	3.21658
Tb11.01.0060	DNA polymerase kappa, putative ,DNA polymerase IV, putative	DNA synthesis, modification, repair	0.289006	0.00117471	2.67302
Tb927.7.610	DNA ligase, putative ,mitochondrial DNA ligase homolog, putative	DNA synthesis, modification, repair	0.174671	7.37905e-09	1.98264
Tb927.7.580	GTP-binding protein, putative	Enzyme	0.133966	0.000307929	18.3432
Tb11.01.4940	AAA ATPase, putative	Enzyme	0.263821	1.82904e-05	11.9115
Tb11.01.4960	regulator of nonsense transcripts 1, putative ,nonsense mRNA reducing factor 1, putative	Enzyme	0.275521	3.46052e-05	11.4498
Tb927.5.3050	poly(ADP-ribose) polymerase, putative	Enzyme	0.286833	0.00392832	5.53347
Tb11.02.3040	aldo/keto reductase, putative	Enzyme	0.25228	0.000437857	3.57588
Tb09.211.4240	phosphoinositide-binding protein, putative	Enzyme	0.433091	0.00896211	2.96542
Tb927.10.5670	N-acetyltransferase subunit Nat1, putative	Enzyme	0.282633	6.45697e-05	2.36317
Tb11.01.6240	expression site-associated gene (ESAG) protein, putative ,expression site-associated gene 2 (ESAG2) protein, putative	ESAG	0.0892264	8.93599e-12	12.5653
Tb927.10.9490	expression site-associated gene 3 (ESAG3)-like protein	ESAG	0.218552	0.00365051	11.8533
Tb927.3.560	expression site-associated gene (ESAG) protein, putative ,expression site-associated gene 11 (ESAG11) protein, putative	ESAG	0.25304	0.0055086	11.8139
Tb927.1.5100	expression site-associated gene 2 (ESAG2) protein, putative	ESAG	0.283068	0.000256246	11.8115
Tb927.10.9500	expression site-associated gene (ESAG) protein, putative ,expression site-associated gene 3 (ESAG3) protein, putative	ESAG	0.180739	8.4125e-05	11.6049
Tb927.1.5110	expression site-associated gene 11 (ESAG11) protein, putative	ESAG	0.339984	0.00391945	11.2692
Tb11.03.0990	expression site-associated gene 4 (ESAG4) protein, putative ,receptor-type adenylate cyclase	ESAG	0.313324	0.00093399	10.7251
Tb927.1.4890	expression site-associated gene 2 (ESAG2) protein, putative	ESAG	0.32116	0.00736418	10.6382
Tb11.01.6250	expression site-associated gene (ESAG) protein, putative ,expression site-associated gene 11 (ESAG11) protein, putative	ESAG	0.287742	0.000467029	10.4709
Tb927.1.4900	expression site-associated gene 11 (ESAG11) protein, putative	ESAG	0.421471	0.00914047	8.01074
Tb927.6.2850	ESAG8-associated protein, putative	ESAG	0.0843498	7.13151e-06	7.08338
Tb927.7.170	expression site-associated gene (ESAG) protein, putative ,expression site-associated gene 9 (ESAG9) protein, putative	ESAG	0.329563	0.00348472	3.68357
Tb927.3.5790	expression site-associated gene (ESAG, pseudogene), putative ,expression site-associated gene 9 (ESAG9), point mutation	ESAG pseudogene	0.252492	0.0040389	15.785
Tb927.8.2610	5-methyltetrahydropteroyltriglutamate-homocysteine S-methyltransferase, putative	Folate	0.263804	6.34572e-05	19.8352
Tb927.7.5480	dihydrofolate reductase-thymidylate synthase	Folate	0.320884	0.000582155	7.86652
Tb11.01.6410	phosphomannose isomerase, putative	Glucose & glycerol	0.199665	2.39445e-06	21.3362
Tb11.22.0003	phosphoglycerate kinase, putative	Glucose & glycerol	0.372628	0.00236832	7.1211
Tb927.1.3830	glucose-6-phosphate isomerase, glycosomal	Glucose & glycerol	0.304305	0.00548867	5.27813
Tb927.10.7930	2,3-bisphosphoglycerate-independent phosphoglycerate mutase	Glucose & glycerol	0.203857	0.00347295	2.72672
Tb927.10.6880	glyceraldehyde 3-phosphate dehydrogenase, cytosolic	Glucose & glycerol	0.38034	0.00135339	1.87344
Tb927.10.2010	hexokinase	Glucose & glycerol	0.397794	0.00182419	1
Tb927.10.2020	hexokinase	Glucose & glycerol	0.407032	0.0024621	1
Tb11.01.2140	glycosyl hydrolase-like protein	Glycan synthesis & metabolism	0.226935	2.04698e-06	16.8881
Tb11.01.8280	CMP-sialic acid transporter, putative	Glycan synthesis & metabolism	0.332905	0.00143362	10.4994
Tb927.3.4630	UDP-glucose:glycoprotein glucosyltransferase, putative	Glycan synthesis & metabolism	0.246661	5.92369e-06	6.49674
Tb927.10.15490	GDP-mannose 4,6 dehydratase, putative	Glycan synthesis & metabolism	0.353441	0.00594701	1.99085
Tb11.02.0630	ABC transporter, putative ,adrenoleukodystrophy protein homolog	Glycosome biogenesis	0.322323	0.000630963	4.42874
Tb927.7.7530	receptor-type adenylate cyclase GRESAG 4, putative	GRESAG	0.220288	1.14191e-07	20.424
Tb927.7.7520	receptor-type adenylate cyclase GRESAG 4, putative	GRESAG	0.220457	1.17065e-07	20.2914
Tb927.4.4430	adenylyl cyclase	GRESAG	0.217029	8.8994e-08	17.1104
Tb927.4.4450	adenylyl cyclase	GRESAG	0.199733	1.5395e-08	17.0905
Tb927.4.4440	adenylyl cyclase	GRESAG	0.190028	5.3863e-09	17.0348
Tb927.4.4460	adenylyl cyclase	GRESAG	0.195026	1.06727e-08	17.0118
Tb927.4.4420	adenylyl cyclase, pseudogene, putative ,adenylyl cyclase, frameshift	GRESAG	0.195057	9.44196e-09	16.8949
Tb927.4.4410	adenylyl cyclase	GRESAG	0.20718	3.26032e-08	16.7462
Tb927.4.4470	adenylyl cyclase	GRESAG	0.184231	3.60672e-09	16.28
Tb927.7.7470	receptor-type adenylate cyclase GRESAG 4, putative	GRESAG	0.326813	0.00473054	13.4523
Tb927.10.2430	receptor-type adenylate cyclase GRESAG 4, putative	GRESAG	0.308957	0.000455306	9.89571
Tb11.01.5310	receptor-type adenylate cyclase GRESAG 4, putative	GRESAG	0.388621	0.00437252	7.57955
Tb11.27.0001	receptor-type adenylate cyclase GRESAG 4, putative	GRESAG	0.429994	0.00892997	4.28226
Tb927.6.100	receptor-type adenylate cyclase GRESAG 4, pseudogene, putative ,receptor-type adenylate cyclase GRESAG 4, degenerate	GRESAG	0.329876	0.00511387	3.44911
Tb927.10.12510	P-type H%2B-ATPase, putative	Ion channel or pump	0.375432	0.001157	13.9324
Tb927.10.12500	P-type H%2B-ATPase, putative	Ion channel or pump	0.366338	0.00088095	12.5708
Tb927.8.650	cation-transporting ATPase, putative	Ion channel or pump	0.373552	0.00152712	9.71826
Tb09.244.2570	calcium motive p-type ATPase, putative	Ion channel or pump	0.108769	1.2464e-13	4.99377
Tb927.4.4960	metal-ion transporter, putative	Ion channel or pump	0.405236	0.00966658	3.50488
Tb927.6.3550	phospholipid-translocating P-type ATPase (flippase), putative	Lipids & fatty acids	0.177239	9.51134e-05	13.8826
Tb927.4.3160	dihydroxyacetone phosphate acyltransferase, putative	Lipids & fatty acids	0.305676	0.000268235	9.15541
Tb927.6.1500	alkyl-dihydroxyacetone phosphate synthase ,alkyl-DHAP synthase ,alkylglycerone-phosphate synthase	Lipids & fatty acids	0.34277	0.000839751	6.30499
Tb11.18.0008	diacylglycerol acyltransferase, putative	Lipids & fatty acids	0.325416	0.000321539	6.00395
Tb927.6.3630	sphingosine 1-phosphate lyase, putative	Lipids & fatty acids	0.395303	0.00605535	2.64525
Tb927.7.2250	carnitine O-palmitoyltransferase II, putative	Lipids & fatty acids	0.405631	0.0086227	2.60537
Tb927.8.7100	acetyl-CoA carboxylase, putative	Lipids & fatty acids	0.333905	0.000220235	1
Tb11.02.2850	hypothetical protein, conserved ,leucine-rich repeat protein (LRRP), putative	LRRP	0.232646	1.19121e-06	17.9589
Tb927.6.1160	hypothetical protein, conserved ,leucine-rich repeat protein (LRRP), putative	LRRP	0.313437	0.00505725	17.6051
Tb927.7.5600	hypothetical protein, conserved ,leucine-rich repeat protein (LRRP), putative	LRRP	0.337242	0.00155912	16.929
Tb11.01.4390	leucine-rich repeat protein (LRRP), putative	LRRP	0.292681	0.000182429	16.8297
Tb11.02.1564	leucine-rich repeat protein (LRRP), putative	LRRP	0.227296	0.00272733	16.1255
Tb927.3.2790	hypothetical protein, conserved ,leucine-rich repeat protein (LRRP), putative	LRRP	0.248415	3.90225e-05	14.5462
Tb927.2.690	leucine-rich repeat protein (LRRP), putative ,leucine-rich repeat protein 1 (LRRP1), putative	LRRP	0.0797496	0.000319618	10.6412
Tb927.2.170	leucine-rich repeat protein (LRRP), putative ,leucine-rich repeat protein 1 (LRRP1), putative	LRRP	0.0883042	8.23699e-05	10.5584
Tb927.1.370	leucine-rich repeat protein (LRRP), putative	LRRP	0.103197	0.000881756	9.9014
Tb927.6.130	leucine-rich repeat protein (LRRP, pseudogene), putative ,leucine-rich repeat protein 1 (LRRP1), frameshift	LRRP	0.0892983	4.68831e-06	9.88635
Tb927.2.1310	leucine-rich repeat protein (LRRP, pseudogene), putative ,leucine-rich repeat protein (LRRP), frameshift	LRRP	0.101882	9.45782e-05	9.7747
Tb927.1.480	leucine-rich repeat protein (LRRP), putative	LRRP	0.0926916	0.000497394	9.77004
Tb927.7.7540	leucine-rich repeat protein (LRRP, pseudogene), putative ,leucine-rich repeat protein 1 (LRRP1), degenerate	LRRP	0.134433	0.0022888	9.28969
Tb927.4.160	leucine-rich repeat protein (LRRP, pseudogene), putative ,leucine-rich repeat protein 1 (LRRP1), frameshift	LRRP	0.102138	6.57797e-06	9.28609
Tb09.211.4960	leucine-rich repeat protein (LRRP, pseudogene), putative ,leucine-rich repeat protein (LRRP), point mutation	LRRP	0.132888	0.00078943	8.79
Tb927.1.290	leucine-rich repeat protein (LRRP), putative	LRRP	0.0935695	1.75924e-06	8.72922
Tb927.2.1380	leucine-rich repeat protein (LRRP), putative	LRRP	0.304215	0.00337255	6.13887
Tb11.03.0280	hypothetical protein, conserved ,leucine-rich repeat protein (LRRP), putative	LRRP	0.253519	2.66455e-05	3.63351
Tb927.10.14410	hypothetical protein, conserved ,leucine-rich repeat protein (LRRP), putative	LRRP	0.311324	0.000338221	3.14713
Tb927.10.14460	hypothetical protein, conserved ,leucine-rich repeat protein (LRRP), putative	LRRP	0.382978	0.00436639	2.50056
Tb927.8.1200	vacuolar-type Ca2%2B-ATPase 2	Lysosome	0.345201	0.000409601	18.2825
Tb927.8.1160	vacuolar-type Ca2%2B-ATPase, putative	Lysosome	0.399931	0.00277226	18.0694
Tb927.8.1180	vacuolar-type Ca2%2B-ATPase 1	Lysosome	0.389856	0.00203645	17.5625
Tb11.02.5130	neurobeachin/beige protein, putative	Lysosome	0.405016	0.00366088	11.7118
Tb927.5.640	trans-sialidase, putative ,neuraminidase, putative	Membrane	0.394912	0.00624595	13.2071
Tb927.5.1390	64 kDa invariant surface glycoprotein	Membrane	0.224002	3.22348e-05	12.3407
Tb11.01.7130	Tb-291 membrane associated protein, putative ,membrane associated protein, putative	Membrane	0.0896757	4.99873e-15	12.0881
Tb09.v2.0010	invariant surface glycoprotein 100 (pseudogene), putative ,invariant surface glycoprotein 100, point mutation	Membrane	0.0261275	1.23749e-30	11.6403
Tb927.5.1410	64 kDa invariant surface glycoprotein	Membrane	0.260865	7.41256e-05	11.4348
Tb927.10.7180	cysteine-rich, acidic integral membrane protein precursor	Membrane	0.0523712	0.00426516	9.99592
Tb927.3.5530	Tb-292 membrane associated protein	Membrane	0.187629	1.33174e-08	6.35451
Tb11.02.3780	phosphoinositide-specific phospholipase C, putative	Membrane	0.365256	0.00515202	5.02289
Tb927.8.1610	MSP-B, putative	Membrane	0.330589	0.000232672	3.327
Tb927.8.1640	MSP-B, putative	Membrane	0.325129	0.000188964	3.0702
Tb927.8.1620	MSP-B, putative	Membrane	0.326801	0.0001962	3.00289
Tb927.8.1630	MSP-B, putative	Membrane	0.326801	0.0001962	3.00289
Tb927.1.4010	hypothetical protein, conserved	Mitochondrial DNA	0.357299	0.0025427	13.0574
Tb927.10.1900	DNA topoisomerase IA, putative	Mitochondrial DNA	0.267747	0.000236867	11.14
Tb927.7.3990	mitochondrial DNA polymerase I protein C	Mitochondrial DNA	0.203646	0.00580084	10.9397
Tb927.5.2780	mitochondrial DNA polymerase beta	Mitochondrial DNA	0.314462	0.00155558	9.05525
Tb11.02.0770	mitochondrial DNA polymerase I protein D, putative	Mitochondrial DNA	0.356479	0.00073879	9.05342
Tb09.160.4090	DNA topoisomerase ii	Mitochondrial DNA	0.175328	1.74452e-08	8.38036
Tb927.8.3560	DNA repair and recombination helicase	Mitochondrial DNA	0.304188	0.00725746	8.23935
Tb927.4.2950	mitochondrial DNA polymerase I protein A, putative	Mitochondrial DNA	0.288653	0.000119285	5.78339
Tb11.02.4730	DNA repair and recombination helicase protein PIF1, putative ,DNA repair and recombination protein, mitochondrial precursor, putative	Mitochondrial DNA	0.173206	1.36289e-08	5.48543
Tb11.01.8090	kinetoplast DNA-associated protein, putative	Mitochondrial DNA	0.361214	0.00223296	4.6296
Tb11.02.2300	mitochondrial DNA polymerase I protein B	Mitochondrial DNA	0.326011	0.000301766	4.17652
Tb927.5.1470	NADH-cytochrome b5 reductase, putative	Mitochondrial electron transport	0.305107	0.00519024	13.3051
Tb927.8.3380	electron transfer protein, putative	Mitochondrial electron transport	0.380224	0.00736792	7.49551
Tb927.8.5120	cytochrome c	Mitochondrial electron transport	0.221539	0.0013749	1.89312
Tb927.4.1660	mitochondrial carrier protein, putative	Mitochondrial pathway	0.347605	0.00654595	15.3061
Tb927.10.7610	hypothetical protein, conserved	Mitochondrial pathway	0.238835	7.81061e-06	14.6669
Tb927.6.2790	L-threonine 3-dehydrogenase, putative	Mitochondrial pathway	0.417011	0.00464821	4.78867
Tb09.211.4400	hypothetical protein, conserved	Mitochondrial pathway	0.262886	0.000386518	2.63605
Tb09.211.1600	hypothetical protein, conserved	Mitochondrial pathway	0.354327	0.00403153	0.912887
Tb927.4.1500	RNA editing associated helicase 2	Mitochondrial RNA	0.216885	0.002619	14.775
Tb927.10.9720	RNA-editing-associated protein 1 ,RNA-binding protein ,oligo (U) binding protein ,RNA editing complex protein	Mitochondrial RNA	0.361411	0.00212971	7.90426
Tb11.02.0130	hypothetical protein, conserved	Mitochondrial RNA	0.283946	0.00012748	2.70857
Tb11.02.3530	mitochondrial DNA-directed RNA polymerase	Mitochondrial RNA	0.422527	0.00812123	2.54564
Tb927.4.3020	ATP-dependent DEAH-box RNA helicase, putative	Mitochondrial RNA	0.339255	0.00127359	2.35411
Tb927.8.8180	hypothetical protein, conserved	Mitochondrial RNA	0.362194	0.00151497	1.96035
Tb927.4.4150	hypothetical protein, conserved	Mitochondrial RNA	0.379141	0.00287286	1.69796
Tb927.10.5010	Mitochondrial elongation factor G, putative	Mitochondrial translation	0.167313	2.78973e-07	16.6088
Tb927.5.4040	hypothetical protein, conserved	Mitochondrial translation	0.284804	0.000241741	7.54832
Tb927.2.4400	hypothetical protein, conserved	Mitochondrial translation	0.278909	8.77455e-05	3.19526
Tb11.02.3670	hypothetical protein, conserved	Mitochondrial translation	0.34806	0.00252107	2.76362
Tb927.7.3050	hypothetical protein, conserved	Mitochondrial translation	0.309545	0.000315461	2.65016
Tb11.02.2710	hypothetical protein, conserved	Mitochondrial translation	0.221584	4.40437e-06	2.63044
Tb11.02.0270	Nucleoporin	Nucleo-cytoplasmic transport	0.363233	0.0028903	24.3129
Tb927.7.2300	Nucleoporin	Nucleo-cytoplasmic transport	0.359152	0.000994372	19.0945
Tb927.10.2900	importin beta-1 subunit, putative	Nucleo-cytoplasmic transport	0.207263	5.4017e-07	12.1917
Tb927.2.4230	NUP-1 protein, putative	Nucleo-cytoplasmic transport	0.0296921	7.31043e-32	11.8293
Tb11.01.2885	Nucleoporin	Nucleo-cytoplasmic transport	0.430279	0.0078302	11.6568
Tb11.22.0004	hypothetical protein, conserved	Nucleo-cytoplasmic transport	0.391195	0.00375753	8.44061
Tb09.160.0340	Nucleoporin	Nucleo-cytoplasmic transport	0.320098	0.000223004	6.44965
Tb11.03.0810	Nucleoporin	Nucleo-cytoplasmic transport	0.418933	0.00747251	1.85988
Tb11.01.7010	hypothetical protein, conserved	Nucleo-cytoplasmic trasnport	0.339223	0.000345092	11.4485
Tb11.02.5720	ribonucleoside-diphosphate reductase large chain	Nucleotides	0.341396	0.000401512	6.3443
Tb927.10.1390	hypoxanthine-guanine phosphoribosyltransferase, putative	Nucleotides-Purines	0.200752	0.000449975	0.420405
Tb927.10.880	thymidine kinase, putative	Nucleotides-Pyrimidines	0.281024	0.00199439	6.54262
Tb927.1.1240	cytidine triphosphate synthase, putative	Nucleotides-Pyrimidines	0.218885	1.0295e-06	3.22315
Tb927.5.3810	orotidine-5-phosphate decarboxylase/orotate phosphoribosyltransferase, putative ,OMPDCase-OPRTase, putative	Nucleotides-Pyrimidines	0.256731	9.25087e-06	2.21477
Tb927.10.5690	procyclin-associated gene 2 (PAG2) protein, putative	PAG	0.26872	0.00289293	7.13545
Tb927.7.7160	kinetoplastid-specific dual specificity phosphatase, putative	Phosphatase	0.212969	0.0024621	15.9324
Tb927.10.3490	kinetoplastid-specific dual specificity phosphatase, putative	Phosphatase	0.364596	0.00327339	5.85408
Tb09.160.5550	calpain-like cysteine peptidase, putative ,cysteine peptidase, Clan CA, family C2, putative	Protease or peptidase	0.204198	7.55361e-06	17.1389
Tb927.3.4230	subtilisin-like serine peptidase ,serine peptidase, clan SB, family S8-like protein	Protease or peptidase	0.162007	2.08906e-09	16.3875
Tb11.02.1280	subtilisin-like serine peptidase ,serine peptidase, clan SB, family S8-like protein	Protease or peptidase	0.416205	0.0078711	15.2286
Tb11.52.0003	oligopeptidase b ,serine peptidase, clan SC, family S9A-like protein	Protease or peptidase	0.233807	1.36422e-06	12.0515
Tb927.1.2120	calpain, putative ,cysteine peptidase, Clan CA, family C2, putative	Protease or peptidase	0.267652	0.00706674	8.7635
Tb927.8.7520	aminopeptidase, putative	Protease or peptidase	0.343085	0.00283783	4.37271
Tb11.47.0035	calpain-like cysteine peptidase, putative ,antigen, putative ,cysteine peptidase, Clan CA, family C2, putative	Protease or peptidase	0.149208	0.000574893	4.01948
Tb11.47.0036	calpain, putative ,cysteine peptidase, Clan CA, family C2, putative	Protease or peptidase	0.0224279	5.37645e-35	3.50991
Tb11.57.0008	calpain-like protein, putative ,cytoskeleton assocociated protein, putative	Protease or peptidase	0.0275758	1.53666e-33	3.3164
Tb927.8.8330	calpain, putative ,cysteine peptidase, putative	Protease or peptidase	0.252173	1.55631e-05	1.12342
Tb927.8.1100	protein kinase, putative	Protein kinase	0.365138	0.00189515	18.3608
Tb927.5.2820	protein kinase, putative	Protein kinase	0.350517	0.00309561	18.0577
Tb927.5.3160	protein kinase, putative	Protein kinase	0.253952	2.03478e-05	17.283
Tb927.8.7110	serine/threonine-protein kinase a, putative ,protein kinase, putative	Protein kinase	0.309452	0.000545411	16.7408
Tb927.10.15300	protein kinase, putative	Protein kinase	0.156876	5.26064e-09	16.6501
Tb927.5.3150	protein kinase , putative	Protein kinase	0.25904	0.0019316	16.1904
Tb927.10.1910	protein kinase, putative ,serine/threonine protein kinase, putative	Protein kinase	0.40243	0.00820559	15.9586
Tb927.7.3580	protein kinase, putative	Protein kinase	0.347756	0.00245045	15.2784
Tb927.2.1820	protein kinase, putative	Protein kinase	0.292178	0.000291734	14.1352
Tb927.5.3320	protein kinase, putative	Protein kinase	0.325117	0.000336103	13.7362
Tb927.7.4090	serine/threonine-protein kinase, putative	Protein kinase	0.272619	0.00410987	13.6869
Tb927.8.4260	protein kinase, putative	Protein kinase	0.281001	0.000840474	13.6247
Tb927.6.4970	serine/arginine-rich protein specific kinase SRPK, putative ,protein kinase, putative	Protein kinase	0.420375	0.00770635	13.4747
Tb927.1.1530	protein kinase, putative	Protein kinase	0.319243	0.000260049	13.3806
Tb927.3.2690	serine/threonine-protein kinase, putative ,protein kinase, putative	Protein kinase	0.304974	0.000497394	13.117
Tb927.6.3430	protein kinase, putative	Protein kinase	0.356685	0.00505783	12.9467
Tb09.211.3410	protein kinase, putative	Protein kinase	0.11435	1.11127e-09	12.9282
Tb927.3.2440	serine/threonine-protein kinase, putative ,protein kinase, putative	Protein kinase	0.332012	0.00352003	12.4164
Tb927.10.12040	protein kinase, putative ,mitogen-activated protein kinase 11, putative	Protein kinase	0.322069	0.00168898	11.4542
Tb927.10.3340	protein kinase, putative	Protein kinase	0.317621	0.000988553	10.4999
Tb927.2.2720	protein kinase, putative	Protein kinase	0.395652	0.0098761	10.4732
Tb927.8.6490	protein kinase, putative	Protein kinase	0.300419	0.00228899	8.93339
Tb927.4.5310	serine/threonine-protein kinase a, putative ,protein kinase, putative	Protein kinase	0.138014	2.03987e-08	6.39773
Tb927.7.6310	polo-like protein kinase ,protein kinase	Protein kinase	0.162776	8.15745e-06	3.5864
Tb11.02.2210	protein kinase A regulatory subunit	Protein kinase	0.231285	0.0016282	2.98549
Tb927.5.790	casein kinase I isoform 1	Protein kinase	0.203033	4.51537e-06	2.93514
Tb09.160.0990	protein kinase, putative	Protein kinase	0.342418	0.00194619	2.13785
Tb927.8.870	serine/threonine kinase, putative ,protein kinase, putative	Protein kinase	0.328974	0.0043605	2.06164
Tb927.5.800	casein kinase I, isoform 2	Protein kinase	0.196602	3.09743e-07	1.20944
Tb927.1.4050	protein phosphatase with EF-Hand domains (PPEF) ,ser/thr protein phosphatase, putative	Protein phosphatase	0.375902	0.00331645	15.4699
Tb927.5.4380	kinetoplastid-specific phospho-protein phosphatase, putative	Protein phosphatase	0.336614	0.000820798	5.16738
Tb927.2.460	DNA-directed RNA polymerase, pseudogene, putative ,DNA-directed RNA polymerase, degenerate	pseudogene	0.237815	0.0025427	13.3781
Tb927.6.360	UDP-Gal or UDP-GlcNAc-dependent glycosyltransferase (pseudogene), putative ,UDP-Gal or UDP- GlcNAc-dependent glycosyltransferase, degenerate	pseudogene	0.307515	0.00667145	13.3338
Tb11.01.0980	hypothetical protein, conserved (pseudogene)	pseudogene	0.22222	2.17113e-06	12.5451
Tb927.6.5190	DNA-directed RNA polymerase III, pseudogene, putative ,DNA-directed RNA polymerase III, degenerate	pseudogene	0.228664	0.00203479	12.3616
Tb927.4.230	DNA-directed RNA polymerase III subunit, pseudogene, putative ,DNA-directed RNA polymerase III subunit, degenerate	pseudogene	0.280475	0.00560209	12.3481
Tb11.52.0006	hypothetical protein, conserved (pseudogene)	pseudogene	0.179133	4.18228e-09	5.63821
Tb11.01.7550	iron superoxide dismutase	Redox pathways	0.350378	0.000657448	3.84935
Tb927.2.370	retrotransposon hot spot (RHS) protein, putative ,retrotransposon hot spot protein 1 (RHS1), putative	RHS	0.280651	2.24009e-05	18.2763
Tb927.1.180	retrotransposon hot spot protein 1 (RHS1), putative	RHS	0.299975	0.000110565	18.0452
Tb927.1.220	retrotransposon hot spot protein 1 (RHS1), putative	RHS	0.302248	4.01796e-05	17.9242
Tb927.4.100	retrotransposon hot spot protein (RHS, pseudogene), putative ,retrotransposon hot spot protein 1 (RHS1), interrupted	RHS	0.314365	0.000118569	16.5545
Tb927.2.820	retrotransposon hot spot protein (RHS, pseudogene), putative ,retrotransposon hot spot protein 1 (RHS1), interrupted	RHS	0.324396	0.000143485	16.5022
Tb927.2.100	retrotransposon hot spot (RHS) protein, putative ,retrotransposon hot spot protein 1 (RHS1), putative	RHS	0.368119	0.000804044	16.0399
Tb927.10.70	retrotransposon hot spot (RHS), putative, (fragment)	RHS	0.35673	0.00610584	15.8137
Tb927.1.420	retrotransposon hot spot (RHS) protein, putative ,retrotransposon hot spot protein 5 (RHS5), putative	RHS	0.32454	0.000318749	12.9189
Tb927.2.1170	retrotransposon hot spot (RHS) protein, putative ,retrotransposon hot spot protein 5 (RHS5), putative	RHS	0.337782	0.000663569	12.6827
Tb927.2.240	retrotransposon hot spot (RHS) protein, putative ,retrotransposon hot spot protein 5 (RHS5), putative	RHS	0.3203	0.000238494	12.44
Tb927.6.140	retrotransposon hot spot (RHS) protein, putative ,retrotransposon hot spot protein 5 (RHS5), putative	RHS	0.3143	0.000746895	11.9619
Tb927.4.250	retrotransposon hot spot (RHS) protein, putative ,retrotransposon hot spot protein 5 (RHS5), putative	RHS	0.350395	0.00566982	11.5843
Tb927.2.1080	retrotransposon hot spot (RHS) protein, putative ,retrotransposon hot spot protein 5 (RHS5), putative	RHS	0.294427	8.22684e-05	11.5292
Tb927.1.410	retrotransposon hot spot protein (RHS, pseudogene), putative	RHS	0.407909	0.00943114	11.503
Tb927.6.5160	retrotransposon hot spot protein (RHS, pseudogene), putative ,retrotransposon hot spot protein 3 (RHS3), point mutation	RHS	0.328932	0.00378426	11.293
Tb927.2.1180	retrotransposon hot spot (RHS) protein, putative ,retrotransposon hot spot protein 3 (RHS3), putative	RHS	0.329286	0.000516026	10.8438
Tb11.02.2380	retrotransposon hot spot protein (RHS, pseudogene), putative ,retrotransposon hot spot protein (RHS), degenerate	RHS	0.310314	0.00744566	10.1417
Tb927.1.90	retrotransposon hot spot protein (RHS, pseudogene), putative	RHS	0.325968	0.00155558	9.68389
Tb927.6.160	retrotransposon hot spot (RHS) protein, putative ,retrotransposon hot spot protein 1 (RHS1), putative	RHS	0.188754	2.95919e-06	9.32418
Tb927.6.150	retrotransposon hot spot protein (RHS, pseudogene), putative ,retrotransposon hot spot protein 3 (RHS3), frameshift	RHS	0.282435	0.00158689	8.2177
Tb927.7.2030	retrotransposon hot spot (RHS) protein, putative ,retrotransposon hot spot protein 7 (RHS7), putative	RHS	0.185027	2.36373e-05	7.0596
Tb927.7.2020	retrotransposon hot spot (RHS) protein, putative ,retrotransposon hot spot protein 7 (RHS7), putative	RHS	0.208555	0.000131958	5.54627
Tb927.4.300	retrotransposon hot spot (RHS) protein, putative ,retrotransposon hot spot protein 3 (RHS3), putative	RHS	0.224126	0.00463073	5.42117
Tb927.7.2010	retrotransposon hot spot (RHS) protein, putative ,retrotransposon hot spot protein 7 (RHS7), putative	RHS	0.189296	6.64625e-05	4.60017
Tb927.7.2000	retrotransposon hot spot (RHS) protein, putative ,retrotransposon hot spot protein 7 (RHS7), putative	RHS	0.181668	4.64628e-05	4.4842
Tb927.7.1960	retrotransposon hot spot (RHS) protein, putative ,retrotransposon hot spot protein 7 (RHS7), putative	RHS	0.244973	0.000820351	3.11814
Tb927.7.1980	retrotransposon hot spot (RHS) protein, putative ,retrotransposon hot spot protein 7 (RHS7), putative	RHS	0.148073	2.24792e-05	3.03548
Tb927.7.1950	retrotransposon hot spot (RHS) protein, putative ,retrotransposon hot spot protein 7 (RHS7), putative	RHS	0.235892	0.000728284	2.82805
Tb927.7.1970	retrotransposon hot spot (RHS) protein, putative ,retrotransposon hot spot protein 7 (RHS7), putative	RHS	0.23729	0.000790427	2.36215
Tb927.7.1990	retrotransposon hot spot protein (RHS, pseudogene), putative ,retrotransposon hot spot protein 7 (RHS7), point mutation	RHS	0.195796	0.000580315	2.18868
Tb927.7.2580	hypothetical protein, conserved ,zinc finger protein family member, putative	RNA binding	0.402835	0.0098761	16.4299
Tb09.160.3150	RBP32	RNA binding	0.188579	0.000177491	12.0453
Tb927.3.5250	hypothetical protein, conserved ,ZFP family member, putative	RNA binding	0.356237	0.00231525	11.8426
Tb927.3.3970	RNA binding protein, putative	RNA binding	0.321701	0.00219341	11.2787
Tb927.7.2680	hypothetical protein, conserved ,zinc finger protein family member, putative	RNA binding	0.28987	0.00195502	9.8444
Tb10.v4.0033	#N/A	RNA binding	0.224929	2.79531e-06	7.86378
Tb927.10.4430	pumillo RNA binding protein PUF1	RNA binding	0.224929	2.79531e-06	7.86378
Tb927.6.820	pumilio RNA binding protein, putative	RNA binding	0.186409	9.9855e-07	7.40926
Tb11.02.3610	RNA-binding protein, putative	RNA binding	0.422226	0.00685499	5.48883
Tb09.211.3370	RNA-binding protein, putative	RNA binding	0.120514	4.21173e-09	4.63176
Tb927.8.6440	RNA-binding protein, putative	RNA binding	0.37319	0.00513481	4.18633
Tb927.3.3940	RNA-binding protein, putative	RNA binding	0.177572	0.00622007	3.74586
Tb11.01.5690	DRBD4	RNA binding	0.28199	6.93655e-05	3.73683
Tb11.01.3940	RNA-binding protein, putative	RNA binding	0.333768	0.0043444	2.57043
Tb927.7.2140	hypothetical protein ,zinc finger protein family member, putative	RNA binding	0.239987	1.31022e-05	2.53481
Tb11.46.0009	hypothetical protein, conserved ,zinc finger protein family member, putative	RNA binding	0.252396	4.61368e-05	1.80847
Tb927.6.3480	RNA-binding protein, putative	RNA binding	0.133114	1.06215e-06	1.29977
Tb927.8.710	RNA-binding protein, putative	RNA binding	0.0644601	0.000280573	1
Tb11.03.0580	RNA-binding protein	RNA binding	0.176263	2.73075e-05	1
Tb927.5.810	hypothetical protein, conserved ,zinc finger protein family member, putative	RNA binding	0.3489	0.000394613	1
Tb927.5.2450	5'-3' exonuclease, pseudogene, putative ,5'-3' exonuclease, frameshift ,exoribonuclease 2, frameshift	RNA degradation	0.333041	0.000623511	22.4011
Tb927.8.2370	dicer-like protein	RNA degradation	0.147587	1.30049e-09	14.4125
Tb927.7.4900	5'-3' exonuclease XRNA, putative ,exoribonuclease 1, putative	RNA degradation	0.118787	1.34893e-08	14.1983
Tb927.10.2220	piwi-like protein 1	RNA degradation	0.357755	0.00452511	6.54878
Tb927.8.4540	hypothetical protein, conserved	RNA degradation	0.216627	0.00717659	5.29667
Tb927.5.2140	regulator of nonsense transcripts 1, putative ,nonsense mRNA reducing factor 1, putative	RNA degradation	0.413652	0.00759184	4.90916
Tb11.01.0260	exosome complex exonuclease RRP44, putative	RNA degradation	0.408833	0.00711757	3.50217
Tb927.10.3990	DHH1	RNA degradation	0.313835	9.61739e-05	2.46803
Tb11.01.7100	ATP-dependent DEAD/H RNA helicase, putative	RNA helicase	0.282368	0.001246	5.03641
Tb927.6.3580	ATP-dependent DEAD/H DNA helicase recQ, putative	RNA helicase	0.254587	0.000402035	2.60748
Tb11.02.4920	ATP-dependent DEAD/H RNA helicase, putative	RNA helicase	0.325783	0.00129952	2.23622
Tb11.01.3930	RNA helicase, putative	RNA helicase	0.42254	0.0078668	1.94092
Tb927.10.540	ATP-dependent DEAD/H RNA helicase, putative ,DEAD box RNA helicase, putative	RNA helicase	0.315572	9.95183e-05	1.53346
Tb927.10.6630	ATP-dependent DEAD/H RNA helicase HEL64, putative	RNA helicase	0.326789	0.000416633	1.30535
Tb09.211.2420	PRP8 protein homologue ,U5 snRNA-associated splicing factor	RNA processing	0.2299	7.92187e-07	17.2616
Tb927.5.2290	ATP-dependent RNA helicase, putative	RNA processing	0.356923	0.00152011	14.4475
Tb11.02.3460	pre-mRNA splicing factor, putative ,ATP- dependent RNA helicase, putative	RNA processing	0.382484	0.00296392	4.8025
Tb11.01.6190	RNA guanylyltransferase	RNA processing	0.230643	1.93972e-05	4.57326
Tb927.6.4600	pre-mRNA splicing factor ATP-dependent RNA helicase, putative ,ATP-dependent RNA helicase, putative	RNA processing	0.319702	0.0014099	3.65552
Tb11.01.7080	U5 small nuclear ribonucleoprotein component, putative ,U5 snrnp-specific protein, putative	RNA processing	0.350008	0.00166801	3.61929
Tb927.4.1340	cleavage and polyadenylation specificity factor subunit, putative	RNA processing	0.320293	0.000327866	3.09751
Tb11.01.6170	cleavage and polyadenylation specificity factor-like protein, putative	RNA processing	0.334369	0.000448034	2.77855
Tb11.01.3690	splicing factor 3B subunit 1, putative	RNA processing	0.414527	0.00676143	2.42251
Tb927.2.4710	RNA-binding protein, putative	RNA processing	0.339706	0.000439689	1.62692
Tb11.03.0450	RNA polymerase I second largest subunit	RNA synthesis I	0.423571	0.00622682	3.43387
Tb927.3.3220	hypothetical protein, conserved	RNA synthesis II	0.403873	0.00914047	14.284
Tb927.4.5020	RNA polymerase IIA largest subunit	RNA synthesis II	0.181266	0.00706674	13.6455
Tb927.8.7400	RNA polymerase IIA largest subunit	RNA synthesis II	0.187697	0.00521075	13.4971
Tb927.2.3580	transcription elongation factor s-II, putative	RNA synthesis II	0.217759	1.21662e-05	11.4923
Tb927.8.5090	DNA-directed RNA polymerase I largest subunit	RNA synthesis II	0.336895	0.000809556	11.3912
Tb927.10.2780	DNA-directed RNA polymerase iii largest subunit ,RNA polymerase III largest subunit	RNA synthesis III	0.217505	1.00043e-06	12.7427
Tb927.3.620	ATP-dependent DEAD/H RNA helicase, putative	rRNA-tRNA processing	0.266874	0.0040983	13.9461
Tb11.01.1080	tRNA pseudouridine synthase, putative	rRNA-tRNA processing	0.231703	3.60686e-05	4.094
Tb927.5.4270	ATP-dependent DEAD/H RNA helicase, putative	rRNA-tRNA processing	0.375781	0.0038414	3.77175
Tb927.5.4420	nucleolar RNA helicase II, putative ,nucleolar RNA helicase Gu, putative	rRNA-tRNA processing	0.332362	0.000334204	1.93626
Tb09.160.1160	nucleolar protein	rRNA-tRNA processing	0.402112	0.00203872	1.65467
Tb927.1.2190	hypothetical protein, conserved	Signalling	0.224825	1.56051e-06	15.3269
Tb927.10.8420	phosphatidylinositol 3 kinase, putative	Signalling	0.254727	7.94411e-06	15.1557
Tb927.4.420	phosphatidylinositol 3-kinase (tor2)	Signalling	0.164911	2.08906e-09	15.0999
Tb927.8.3200	hypothetical protein, conserved	Signalling	0.230236	5.07507e-06	14.5372
Tb11.01.6300	phosphatidylinositol 3-related kinase, putative	Signalling	0.153934	6.84246e-08	12.4886
Tb927.4.800	hypothetical protein, conserved	Signalling	0.272421	2.81597e-05	8.21114
Tb927.2.2260	phosphatidylinositol kinase domain protein, putative	Signalling	0.147918	0.00183744	5.5475
Tb11.02.4700	14-3-3 protein	Signalling	0.100347	8.66102e-13	4.14583
Tb11.47.0002	phosphatidylinositol (3,5) kinase, putative	Signalling	0.231514	4.75083e-06	3.46539
Tb927.3.3070	3', 5'-cyclic nucleotide phosphodiesterase, putative	Signalling	0.406329	0.0095658	1.76479
Tb11.01.1290	14-3-3-I protein	Signalling	0.371655	0.000811536	1
Tb927.8.7120	farnesyltransferase, putative ,squalene synthase, putative	Sterols	0.369856	0.0031196	6.41297
Tb11.03.0940	elongation factor, putative	Translation	0.364018	0.00213292	20.6273
Tb927.2.3780	translation initiation factor IF-2, putative	Translation	0.188151	0.007354	15.7258
Tb927.10.8290	eukaryotic translation initiation factor 3 subunit 8, putative	Translation	0.358967	0.000963051	12.7267
Tb927.10.8270	eukaryotic translation initiation factor 3 subunit 8, putative	Translation	0.35978	0.00099105	12.7039
Tb11.01.2330	eukaryotic translation initation factor 4 gamma, putative	Translation	0.138602	2.58324e-10	12.6804
Tb927.10.13360	elongation factor Tu, putative	Translation	0.306183	0.000686573	11.7785
Tb927.5.1490	hypothetical protein, conserved	translation	0.231228	0.000831884	9.8971
Tb11.22.0012	eukaryotic peptide chain release factor subunit 1, putative	Translation	0.40696	0.00697418	9.42734
Tb11.01.4630	hypothetical protein, conserved	Translation	0.390068	0.00388555	3.88006
Tb09.211.2380	hypothetical protein, conserved	Translation	0.212907	4.10881e-05	2.17002
Tb927.10.1500	methionyl-tRNA synthetase, putative	Translation tRNA	0.433005	0.00793	12.0558
Tb11.02.1210	leucyl-tRNA synthetase, putative	Translation tRNA	0.408706	0.00600486	10.3253
Tb927.6.4480	valyl-tRNA synthetase, putative	Translation tRNA	0.324115	0.000184353	9.26464
Tb927.10.9190	isoleucyl-tRNA synthetase, putative	Translation tRNA	0.191909	4.57321e-08	8.39808
Tb927.6.950	cysteinyl-tRNA synthetase, putative	Translation tRNA	0.317456	0.000151875	8.11717
Tb927.6.700	alanyl-tRNA synthetase, putative	Translation tRNA	0.364999	0.00121202	7.69201
Tb11.46.0008	arginyl-tRNA synthetase, putative	Translation tRNA	0.399101	0.00301745	6.88479
Tb927.4.2310	asparaginyl-tRNA synthetase, putative	Translation tRNA	0.298648	5.7847e-05	5.69534
Tb927.10.12890	bifunctional aminoacyl-tRNA synthetase, putative	Translation tRNA	0.314118	0.000124704	3.94034
Tb09.160.4600	ABC transporter, putative	Transporter	0.237237	1.29647e-05	19.7331
Tb927.10.15530	ABC transporter, putative	Transporter	0.304649	0.000201616	17.9331
Tb09.211.3870	transporter, putative	Transporter	0.306342	0.00252105	16.4855
Tb927.10.7700	ABC transporter, putative	Transporter	0.324135	0.00195965	5.41295
Tb927.3.3730	ABC transporter, putative	Transporter	0.385115	0.0095658	4.06438
Tb927.7.3110	transporter protein, putative	Transporter	0.373254	0.00742269	2.69503
Tb11.01.2550	hypothetical protein, conserved	Transporter	0.299364	0.00144754	2.45651
Tb927.10.3520	protease regulatory ATPase subunit 4 ,serine peptidase, Clan SJ, family S16, putative	Ubiquitin & proteasome	0.346968	0.00155859	18.5233
Tb11.01.4060	ubiquitin carboxyl-terminal hydrolase, putative ,cysteine peptidase, Clan CA, family C19, putative	Ubiquitin & proteasome	0.193315	5.23431e-07	16.6045
Tb927.10.9750	ubiquitin-protein ligase, putative	Ubiquitin & proteasome	0.335849	0.000483759	14.2275
Tb09.211.4270	ubiquitin carboxyl-terminal hydrolase, putative ,cysteine peptidase, Clan CA, family C19, putative	Ubiquitin & proteasome	0.288854	0.000153098	12.8576
Tb11.01.0960	proteasome regulatory non-ATP-ase subunit 2	Ubiquitin & proteasome	0.379922	0.0019624	11.0529
Tb09.211.4210	ubiquitin-protein ligase, putative	Ubiquitin & proteasome	0.248693	3.67939e-06	10.5769
Tb927.8.5620	ubiquitin carboxyl-terminal hydrolase, putative	Ubiquitin & proteasome	0.249017	9.28651e-06	8.93177
Tb11.02.3990	S-phase kinase-associated protein, putative ,Skp1 family protein, putative ,Cyclin A/CDK2-associated protein ,Cyclin A/CDK2- associated protein	Ubiquitin & proteasome	0.276393	4.16523e-05	8.30475
Tb927.3.5520	26S proteasome regulatory non-ATPase subunit	Ubiquitin & proteasome	0.377597	0.00144754	7.20213
Tb927.8.2640	ubiquitin-activating enzyme e1, putative	Ubiquitin & proteasome	0.249123	3.14611e-06	5.4322
Tb11.02.0815	ubiquitin-conjugating enzyme, putative ,ubiquitin-conjugating enzyme-like protein, putative	Ubiquitin & proteasome	0.258246	0.000115524	1.95814
Tb11.01.1680	polyubiquitin, putative	Ubiquitin & proteasome	0.175849	6.48412e-10	1
Tb09.211.3610	ubiquitin-activating enzyme e1, putative	Ubiquitin & proteasome	0.350882	0.000350061	1
Tb927.1.260	hypothetical protein, unlikely	unlikely	0.150759	1.06468e-06	9.9908
Tb09.211.2120	hypothetical protein, unlikely	unlikely	0.273014	0.000310907	1
Tb11.02.3170	synaptojanin (N-terminal domain), putative	Vesicular transport	0.332301	0.00236156	13.5181
Tb927.8.4330	small GTP-binding protein Rab11 ,Rab11A GTPase	Vesicular transport	0.328052	0.000463129	5.0846
Tb09.211.1550	chaperone protein DNAj, putative	Vesicular transport	0.227377	7.16063e-06	3.60344
Tb927.10.9230	adaptin complex 4 subunit, putative ,beta-adaptin 4 protein, putative	Vesicular transport	0.372602	0.00480152	2.14805
Tb927.1.5170	variant surface glycoprotein (VSG)-related, putative	VSG	0.252176	0.000639492	17.1746
Tb11.02.1566	variant surface glycoprotein (VSG)-related, putative	VSG	0.342515	0.00272392	5.13154
Tb927.3.1520	variant surface glycoprotein (VSG)-related, putative	VSG	0.109503	1.72923e-11	1.68105
Tb927.3.1470	variant surface glycoprotein (VSG)-related, putative	VSG	0.110778	2.04186e-11	1.63991

## Sheet: PAN2 up
geneID v5	Description	Class	foldChange (PAN2/WT)	padj	HL change (PAN2/WT)
Tb927.1.2985	hypothetical protein, conserved	0	5.12876	2.44601e-06	8.44816
Tb927.4.3780	hypothetical protein, conserved	0	3.03105	0.00196956	7.243
Tb927.8.5320	hypothetical protein, conserved	0	3.56085	9.29252e-05	7.2364
Tb927.8.2830	hypothetical protein, conserved	0	3.05212	0.00143384	5.76294
Tb927.3.5560	hypothetical protein, conserved	0	2.56071	0.00431071	5.41392
Tb927.8.5070	hypothetical protein, conserved	0	2.80166	0.00210591	5.05118
Tb927.3.2740	hypothetical protein, conserved	0	2.31828	0.00795864	4.78595
Tb927.6.2200	hypothetical protein, conserved	0	2.79693	0.000940209	4.00299
Tb927.10.4760	hypothetical protein, conserved	0	2.37058	0.00564269	3.60036
Tb927.5.2160	hypothetical protein, conserved	0	3.3126	0.000245362	3.50557
Tb927.2.2070	hypothetical protein	0	3.81627	0.000358447	3.36216
Tb927.10.14670	hypothetical protein	0	2.66818	0.00777083	3.31223
Tb927.5.2200	hypothetical protein, conserved	0	3.60329	8.91458e-05	3.18807
Tb927.5.2230	hypothetical protein, conserved	0	3.60329	8.91458e-05	3.18807
Tb927.5.2260	hypothetical protein, conserved	0	3.46306	0.000103014	2.96138
Tb927.5.2170	hypothetical protein, conserved	0	3.44888	0.000341125	2.95843
Tb09.160.2160	hypothetical protein, conserved	0	2.89304	0.00415052	2.86471
Tb927.7.4880	hypothetical protein, conserved	0	2.97118	0.0017398	2.70412
Tb927.3.630	hypothetical protein, conserved	0	3.40795	0.00106298	2.58149
Tb927.8.3670	hypothetical protein	0	3.33477	0.00306538	2.55586
Tb11.02.2270	hypothetical protein, conserved	0	2.9004	0.00571867	2.55095
Tb09.160.1030	hypothetical protein, conserved	0	2.88954	0.000737794	2.49498
Tb09.160.1670	hypothetical protein	0	4.63506	1.43588e-06	2.18383
Tb927.8.4650	hypothetical protein, conserved	0	3.45004	0.000312702	2.1485
Tb927.6.4790	hypothetical protein, conserved	0	3.92464	2.91997e-05	2.11822
Tb927.10.11530	hypothetical protein, conserved	0	2.53371	0.00784251	2.11251
Tb927.2.2830	hypothetical protein, conserved	0	3.0217	0.000518686	2.09621
Tb927.3.3010	hypothetical protein, conserved	0	2.78041	0.00580375	2.09395
Tb927.10.15830	hypothetical protein, conserved	0	2.93488	0.00205176	2.0518
Tb927.10.11920	hypothetical protein, conserved	0	4.22467	2.94107e-05	2.04392
Tb927.5.780	hypothetical protein, conserved	0	2.49194	0.00972146	2.03326
Tb927.5.990	hypothetical protein, conserved	0	3.31052	0.000679574	1.99593
Tb927.1.2760	hypothetical protein	0	3.74201	0.0037538	1.99281
Tb927.4.2320	hypothetical protein, conserved	0	2.40102	0.00979381	1.9715
Tb927.10.13920	hypothetical protein, conserved	0	3.52013	0.000559532	1.93447
Tb09.211.2270	hypothetical protein, conserved	0	4.996	1.28178e-06	1.8713
Tb927.2.4800	hypothetical protein, conserved	0	2.50253	0.00615636	1.83321
Tb927.5.420	hypothetical protein	0	2.72291	0.00180032	1.7955
Tb927.7.4210	hypothetical protein, conserved	0	7.42032	2.74391e-07	1.77831
Tb09.160.3880	hypothetical protein, conserved	0	3.50157	0.000128674	1.76236
Tb927.10.6890	hypothetical protein	0	2.66848	0.00358602	1.72973
Tb927.2.4980	hypothetical protein, conserved	0	2.99132	0.0038789	1.65195
Tb927.6.4020	hypothetical protein, conserved	0	2.6829	0.00516683	1.64071
Tb927.3.4520	hypothetical protein, conserved	0	2.47782	0.00462288	1.63966
Tb927.10.10640	hypothetical protein, conserved	0	5.16403	1.00902e-05	1.59537
Tb927.8.2700	hypothetical protein, conserved	0	3.35067	0.00321033	1.55643
Tb927.10.14350	hypothetical protein, conserved	0	4.19355	3.18385e-05	1.54871
Tb927.10.1770	hypothetical protein	0	3.18451	0.00570536	1.5461
Tb927.6.2560	hypothetical protein, conserved	0	2.66555	0.00164841	1.51815
Tb09.211.1300	hypothetical protein, conserved	0	2.56321	0.00284821	1.51691
Tb927.2.3920	hypothetical protein, conserved	0	2.87575	0.00393281	1.50402
Tb927.8.1530	hypothetical protein, conserved	0	2.84839	0.00179418	1.49877
Tb927.5.4370	hypothetical protein, conserved	0	3.92753	0.00728863	1.44944
Tb11.01.4190	hypothetical protein, conserved	0	2.95505	0.00171449	1.44409
Tb927.5.2840	hypothetical protein, conserved	0	3.87703	0.000736049	1.44044
Tb11.01.2750	hypothetical protein, conserved	0	2.74719	0.00542257	1.42058
Tb09.211.1290	hypothetical protein, conserved	0	2.55465	0.00301115	1.39318
Tb927.10.11000	hypothetical protein, conserved	0	2.4827	0.00607555	1.38065
Tb927.3.2350	hypothetical protein, conserved	0	4.03944	9.26855e-05	1.36909
Tb927.3.710	hypothetical protein, conserved	0	3.05017	0.000543239	1.36263
Tb927.8.1470	hypothetical protein, conserved	0	3.09119	0.00120257	1.36215
Tb927.5.4050	hypothetical protein, conserved	0	2.53807	0.00845124	1.35332
Tb11.02.4535	hypothetical protein, conserved	0	2.996	0.00130824	1.35254
Tb927.6.2260	hypothetical protein, conserved	0	2.71488	0.00686509	1.35145
Tb927.6.2320	hypothetical protein, conserved	0	2.71488	0.00686509	1.35145
Tb927.10.12350	hypothetical protein, conserved	0	2.80185	0.00311737	1.34366
Tb927.10.2830	hypothetical protein, conserved	0	2.82356	0.00360883	1.3267
Tb927.10.7720	hypothetical protein, conserved	0	3.64936	0.00124471	1.32636
Tb927.10.14660	hypothetical protein, conserved	0	2.78187	0.00519862	1.31746
Tb927.5.510	hypothetical protein, conserved	0	5.375	4.2267e-07	1.31432
Tb11.02.1920	hypothetical protein, conserved	0	2.57776	0.00887073	1.27328
Tb927.8.5520	hypothetical protein, conserved	0	3.78695	0.000253298	1.27073
Tb11.01.2840	hypothetical protein, conserved	0	3.08702	0.000709438	1.26864
Tb09.211.1740	hypothetical protein, conserved	0	4.95181	0.0021748	1.2592
Tb11.02.0465	hypothetical protein, conserved	0	3.03719	0.00284825	1.25325
Tb927.10.8060	hypothetical protein, conserved	0	2.5291	0.00347689	1.25074
Tb927.1.4160	hypothetical protein, conserved	0	2.79882	0.00292813	1.23634
Tb927.4.780	hypothetical protein, conserved	0	3.38475	0.00098679	1.23019
Tb927.10.15820	hypothetical protein, conserved	0	3.72134	0.00192819	1.22499
Tb927.6.2160	hypothetical protein, conserved	0	2.44079	0.00976758	1.21822
Tb927.10.10760	hypothetical protein	0	4.27057	0.000961333	1.2175
Tb927.5.4160	hypothetical protein, conserved	0	2.58446	0.00686509	1.1847
Tb927.6.4330	hypothetical protein, conserved	0	3.04431	0.00219022	1.18122
Tb927.6.4620	hypothetical protein, conserved	0	3.36942	0.000399513	1.15069
Tb927.10.14650	hypothetical protein, conserved	0	2.66763	0.00232562	1.14202
Tb927.2.3190	hypothetical protein, conserved	0	2.66989	0.00422991	1.13256
Tb11.57.0001	hypothetical protein, conserved	0	2.6229	0.00567386	1.13019
Tb927.8.4530	hypothetical protein, conserved	0	2.85022	0.0031355	1.12951
Tb11.02.2400	hypothetical protein	0	3.46877	0.000494941	1.12648
Tb927.4.170	hypothetical protein	0	2.44691	0.00612691	1.1044
Tb927.8.2290	hypothetical protein, conserved	0	2.76378	0.00335454	1.09807
Tb11.01.0590	hypothetical protein, conserved	0	3.40326	0.000149673	1.09014
Tb11.02.1770	hypothetical protein, conserved	0	2.36991	0.00956472	1.08801
Tb927.2.2500	hypothetical protein, conserved	0	3.27932	0.00320547	1.08006
Tb927.7.630	hypothetical protein, conserved	0	2.35293	0.00837731	1.07986
Tb927.10.11500	hypothetical protein, conserved	0	2.61164	0.00927716	1.07461
Tb927.10.4810	hypothetical protein, conserved	0	3.49431	0.000251271	1.07431
Tb927.10.11030	hypothetical protein, conserved	0	3.70597	8.82933e-05	1.07049
Tb09.211.4630	hypothetical protein, conserved	0	2.83041	0.00531626	1.05763
Tb927.8.4420	hypothetical protein, conserved	0	3.10773	0.00192608	1.04722
Tb927.8.6050	hypothetical protein, conserved	0	2.76718	0.00380093	1.03436
Tb927.5.460	hypothetical protein, conserved	0	2.8528	0.0083849	1.02778
Tb927.8.3420	hypothetical protein, conserved	0	2.8705	0.00189869	1.02633
Tb09.160.1260	hypothetical protein, conserved	0	2.48613	0.00493551	1.00301
Tb09.211.3955	hypothetical protein, conserved ,predicted heat shock factor binding protein	0	2.58057	0.00240059	1
Tb927.6.4010	hypothetical protein, conserved	0	2.63914	0.00176778	1
Tb927.8.6040	hypothetical protein, conserved	0	3.02157	0.000358413	1
Tb927.2.2770	hypothetical protein, conserved	0	3.06786	0.00134182	1
Tb09.160.3530	hypothetical protein, conserved	0	3.46477	0.000958329	1
Tb11.02.3770	hypothetical protein, conserved	0	4.22994	0.00057842	1
Tb11.02.3760	hypothetical protein, conserved	0	4.26125	0.00093422	1
Tb11.01.8226	hypothetical protein, conserved	0	2.97265	0.00288579	0.992618
Tb927.5.1800	hypothetical protein, conserved	0	2.65246	0.00253412	0.990988
Tb09.v4.0014	#N/A	0	2.94246	0.00160856	0.984226
Tb09.160.5570	hypothetical protein, conserved	0	2.50018	0.00431071	0.980551
Tb11.01.0500	hypothetical protein, conserved	0	2.64177	0.00317175	0.980246
Tb927.5.4590	small GTP-binding rab protein, pseudogene, putative ,small GTP-binding rab protein, degenerate	0	2.62389	0.00981967	0.975828
Tb11.01.0300	hypothetical protein, conserved	0	3.6069	0.00349553	0.970451
Tb927.7.4800	hypothetical protein, conserved	0	4.03162	0.00219256	0.966323
Tb11.03.0710	hypothetical protein, conserved	0	2.9748	0.00247063	0.951274
Tb927.10.7590	hypothetical protein, conserved	0	2.96387	0.00130591	0.94682
Tb927.10.8640	hypothetical protein, conserved	0	3.22108	0.00176864	0.94597
Tb927.8.3360	hypothetical protein, conserved	0	5.16113	1.04667e-05	0.93718
Tb927.10.1860	hypothetical protein, conserved	0	3.40976	0.000139363	0.930337
Tb09.v1.0390	hypothetical protein, conserved	0	3.09418	0.000582756	0.922583
Tb09.160.2350	hypothetical protein, conserved	0	4.27621	2.77945e-05	0.91702
Tb11.01.4720	hypothetical protein, conserved	0	2.72778	0.00530624	0.913685
Tb927.3.1220	hypothetical protein, conserved	0	2.64074	0.00449464	0.908153
Tb11.01.6290	hypothetical protein, conserved	0	3.51404	0.000343257	0.902494
Tb11.02.4160	hypothetical protein, conserved	0	3.12323	0.000996946	0.890903
Tb927.3.2850	hypothetical protein, conserved	0	3.21442	0.00940205	0.890695
Tb927.1.3400	hypothetical protein, conserved	0	2.37579	0.00896206	0.889882
Tb927.2.4700	hypothetical protein, conserved	0	4.46	0.000615884	0.889563
Tb927.3.5000	hypothetical protein, conserved	0	2.88276	0.00349553	0.887357
Tb11.02.5165	hypothetical protein, conserved	0	3.53634	0.00501553	0.881733
Tb11.02.1030	hypothetical protein, conserved	0	3.19992	0.00090946	0.868422
Tb927.7.5710	hypothetical protein, conserved	0	2.95161	0.00116834	0.863404
Tb09.160.1490	hypothetical protein, conserved	0	3.54878	0.00202074	0.861229
Tb927.5.2210	hypothetical protein, conserved	0	2.46434	0.00461022	0.858283
Tb927.5.2240	hypothetical protein, conserved	0	2.46434	0.00461022	0.858283
Tb927.10.10710	hypothetical protein, conserved	0	2.90964	0.00401594	0.855222
Tb927.10.1370	hypothetical protein, conserved	0	2.92549	0.00135065	0.854093
Tb927.5.2180	hypothetical protein, conserved	0	2.44509	0.00519862	0.851809
Tb09.160.5660	hypothetical protein, conserved	0	4.33191	5.39361e-06	0.847913
Tb927.5.2910	hypothetical protein, conserved	0	2.9712	0.00140084	0.837882
Tb927.1.4500	hypothetical protein, conserved	0	3.6489	8.92839e-05	0.829893
Tb09.211.2670	hypothetical protein, conserved	0	2.57407	0.00439708	0.823845
Tb927.4.3820	hypothetical protein, conserved	0	2.61298	0.00725397	0.818382
Tb927.8.6820	hypothetical protein, conserved	0	2.39824	0.00799979	0.817854
Tb927.3.1930	hypothetical protein, conserved	0	2.55069	0.00317175	0.816695
Tb09.160.2230	hypothetical protein, conserved	0	3.29481	0.000502623	0.814231
Tb927.10.8380	hypothetical protein, conserved	0	2.55984	0.00680161	0.812963
Tb11.02.1310	hypothetical protein, conserved	0	2.386	0.00897859	0.809307
Tb09.211.4320	hypothetical protein, conserved	0	2.88541	0.00691542	0.803024
Tb927.8.3270	hypothetical protein	0	2.68839	0.00681739	0.800627
Tb11.01.7840	hypothetical protein, conserved	0	3.91433	0.000231062	0.783677
Tb927.4.700	hypothetical protein, conserved	0	3.14745	0.000659904	0.781803
Tb927.6.610	hypothetical protein, conserved	0	2.38386	0.00990385	0.779524
Tb09.211.3150	hypothetical protein, conserved	0	2.71204	0.00732985	0.769316
Tb11.01.6700	hypothetical protein, conserved	0	2.87482	0.00519862	0.766707
Tb927.3.3120	hypothetical protein, conserved	0	2.62604	0.00272386	0.753789
Tb11.02.0420	hypothetical protein, conserved	0	2.90166	0.0051279	0.753199
Tb927.3.660	hypothetical protein, conserved	0	2.74188	0.00215032	0.748383
Tb927.10.1410	hypothetical protein, conserved	0	2.77293	0.00435306	0.730538
Tb927.10.13340	hypothetical protein, conserved	0	3.82768	0.00314599	0.727683
Tb927.6.2180	hypothetical protein, conserved	0	2.73819	0.00309301	0.708742
Tb927.10.2050	hypothetical protein, conserved	0	2.97577	0.000975976	0.70633
Tb11.01.0660	hypothetical protein, conserved	0	2.76036	0.00631641	0.700606
Tb927.2.2590	hypothetical protein, conserved	0	2.61092	0.00861753	0.689994
Tb11.02.4060	hypothetical protein, conserved	0	2.80309	0.0083849	0.670634
Tb927.3.700	hypothetical protein, conserved	0	5.76608	2.35066e-06	0.669926
Tb927.8.2170	hypothetical protein, conserved	0	3.78625	0.000358582	0.65224
Tb927.5.750	hypothetical protein, conserved	0	4.66208	0.000192952	0.640867
Tb09.244.2810	hypothetical protein, conserved	0	2.95391	0.0020301	0.636713
Tb927.10.9030	hypothetical protein, conserved	0	3.23406	0.00707456	0.621041
Tb09.244.2160	hypothetical protein	0	3.52256	0.000113508	0.613
Tb11.01.2300	hypothetical protein, conserved	0	2.88719	0.00638769	0.59245
Tb08.27P2.90	#N/A	0	4.8501	0.000277923	0.577622
Tb927.7.6710	hypothetical protein	0	3.5936	0.00628214	0.568831
Tb927.2.2270	hypothetical protein, conserved	0	4.13895	0.000231131	0.563956
Tb927.1.4620	hypothetical protein, conserved	0	3.50579	0.000143007	0.490943
Tb927.1.4550	hypothetical protein, conserved	0	3.76104	6.8585e-05	0.451602
Tb927.1.4590	hypothetical protein, conserved	0	3.76104	6.8585e-05	0.451602
Tb927.10.6240	ras-like small GTPase, putative	Cell cycle	2.6099	0.00415052	0.702497
Tb927.10.4620	peptidyl-prolyl cis-trans isomerase, putative	Chaperone	3.64298	7.43277e-05	5.86585
Tb927.10.15590	FKBP-type peptidyl-prolyl cis-trans isomerase, conserved ,FKBP-type peptidylprolyl cis-trans isomerase, putative	Chaperone	2.83401	0.00333688	2.67493
Tb927.7.5790	protein disulfide isomerase, putative	Chaperone	2.66074	0.00176113	1
Tb927.7.2820	histone H2A, putative	Chromatin	2.94324	0.000388054	2.94939
Tb927.7.2830	histone H2A, putative	Chromatin	2.96439	0.000341125	2.86575
Tb927.7.2840	histone H2A, putative	Chromatin	2.96439	0.000341125	2.86575
Tb927.7.2850	histone H2A, putative	Chromatin	2.96439	0.000341125	2.86575
Tb927.7.2880	histone H2A, putative	Chromatin	2.96439	0.000341125	2.86575
Tb927.7.2890	histone H2A, putative	Chromatin	2.96439	0.000341125	2.86575
Tb927.7.2900	histone H2A, putative	Chromatin	2.96439	0.000341125	2.86575
Tb927.7.2910	histone H2A, putative	Chromatin	2.96439	0.000341125	2.86575
Tb927.7.2920	histone H2A, putative	Chromatin	2.96439	0.000341125	2.86575
Tb927.7.2930	histone H2A, putative	Chromatin	2.96688	0.000341125	2.84305
Tb927.7.2860	histone H2A, putative	Chromatin	2.88787	0.000461969	2.60534
Tb927.7.2870	histone H2A, putative	Chromatin	2.88787	0.000461969	2.60534
Tb927.7.2940	histone H2A, putative	Chromatin	2.88787	0.000461969	2.60534
Tb09.211.3970	ankyrin repeat protein, putative	Cytoskeleton	3.11451	0.000937697	8.21806
Tb927.8.6950	dynein light chain 2B, cytoplasmic, putative ,predicted dynein modulator ,roadblock/LC7 family member	Cytoskeleton	2.85914	0.00337127	1.84186
Tb11.02.5620	dynein light chain, putative ,dynein Tctex2 family, putative	Cytoskeleton	3.28969	0.00234569	0.948485
Tb11.02.1380	actin, putative	Cytoskeleton_Actin	2.23877	0.0099453	0.834535
Tb927.4.4680	hypothetical protein, conserved	DNA synthesis, modification, repair	3.53878	0.000318143	0.915372
Tb11.01.0290	carbonic anhydrase-like protein	Enzyme	2.42977	0.00847509	2.85428
Tb927.7.5680	deoxyribose-phosphate aldolase, putative	Enzyme	2.68766	0.00284334	2.04598
Tb927.10.4680	NUDIX hydrolase, conserved ,predicted MutT/NUDIX family protein	Enzyme	4.12192	5.66947e-05	1.3709
Tb927.10.1690	nucleotide binding protein, putative	Enzyme	2.61167	0.00692007	0.656099
Tb927.4.3870	receptor-type adenylate cyclase GRESAG 4, putative	ESAG	2.42956	0.00686509	2.52074
Tb09.244.2350	expression site-associated gene 6 (ESAG6, pseudogene), putative ,expression site-associated gene 6 (ESAG6), fragment ,transferrin-binding protein, fragment ,transferrin-binding protein (pseudogene), putative	ESAG pseudogene	2.72671	0.00364621	0.595316
Tb11.01.3040	cytosolic malate dehydrogenase	Glucose & glycerol	2.55595	0.00401177	6.06208
Tb09.211.2730	Gim5A protein ,glycosomal membrane protein	Glycosome biogenesis	2.99224	0.000252927	1
Tb09.211.2740	Gim5B protein ,glycosomal membrane protein	Glycosome biogenesis	3.09831	0.000149097	1
Tb927.10.5080	GPI transamidase component Tta2	GPI anchors & metabolism	2.61917	0.00235121	1.64857
Tb927.4.3860	receptor-type adenylate cyclase GRESAG 4, putative	GRESAG	2.38174	0.00861753	2.16916
Tb927.10.14160	aquaglyceroporin (small solute channel), putative	Ion channel or pump	3.38578	0.000117302	2.18209
Tb927.6.1520	aquaporin 3, putative	Ion channel or pump	2.74869	0.000859666	1
Tb927.10.13930	phosphatidic acid phosphatase, putative	Lipids & fatty acids	3.63924	0.000233585	1.34345
Tb927.3.2030	acylphosphatase, putative	Lipids & fatty acids	3.38927	0.001106	1.25344
Tb11.02.1710	hypothetical protein, conserved	Lipids & fatty acids	2.36012	0.00868601	0.929402
Tb11.02.5260	hypothetical protein, conserved ,predicted zinc finger protein	Lipids & fatty acids	2.62741	0.00284204	0.800118
Tb927.8.530	leucine-rich repeat protein (LRRP, pseudogene), putative ,leucine-rich repeat protein (LRRP), point mutation	LRRP	2.49906	0.00482678	1.48333
Tb927.8.2100	vacuolar ATP synthase 16 kDa proteolipid subunit, putative	Lysosome	2.79627	0.00114356	7.45275
Tb11.02.5470	vacuolar type h%2B ATPase subunit, putative	Lysosome	3.57559	3.25277e-05	4.21956
Tb927.10.200	vacuolar ATP synthase, putative	Lysosome	3.63288	1.40903e-05	1
Tb927.10.12450	hypothetical protein, conserved	Lysosome	2.68478	0.00402468	0.874086
Tb927.3.2650	cytochrome c oxidase copper chaperone, putative	Mitochondrial electron transport	4.20715	4.29137e-05	2.82777
Tb927.8.5120	cytochrome c	Mitochondrial electron transport	4.01348	0.00607355	1.89312
Tb11.02.4485	cytochrome b5, putative	Mitochondrial electron transport	3.57235	0.000432778	1.05646
Tb11.01.7090	hypothetical protein, conserved	Mitochondrial pathway	2.54497	0.00680161	3.79137
Tb927.7.840	hypothetical protein, conserved	Mitochondrial pathway	3.81938	0.00011335	2.19843
Tb11.01.3860	hypothetical protein, conserved	Mitochondrial pathway	3.65607	0.000152212	2.04654
Tb927.10.3040	hypothetical protein, conserved	Mitochondrial pathway	3.60145	6.2299e-05	1.88074
Tb927.3.2880	hypothetical protein, conserved	Mitochondrial pathway	3.43468	0.00169718	1.30445
Tb927.2.2940	hypothetical protein, conserved	Mitochondrial pathway	3.33059	0.00138208	1.19833
Tb927.10.1160	hypothetical protein, conserved	Mitochondrial pathway	3.20124	0.000812869	0.955547
Tb927.8.4440	mitochondrial carrier protein, putative	Mitochondrial pathway	4.03292	0.000358447	0.757372
Tb927.7.3240	hypothetical protein, conserved	Mitochondrial translation	3.58541	0.000130166	2.63027
Tb927.10.1870	hypothetical protein, conserved	Mitochondrial translation	2.80535	0.00381019	1.35848
Tb927.6.2480	chaperone protein DNAj, putative	Mitochondrial translation	2.97156	0.000672344	1.35733
Tb927.3.970	hypothetical protein, conserved	Mitochondrial translation	2.45214	0.0078519	1.16831
Tb11.01.1215	cyclophilin type peptidyl-prolyl cis-trans isomerase, putative	Mitochondrial translation	3.40466	0.00058996	0.953723
Tb927.6.4580	hypothetical protein, conserved	Mitochondrial translation	2.8438	0.00834315	0.850594
Tb927.3.3540	Nucleoporin	Nucleo-cytoplasmic transport	2.55077	0.00332604	0.90152
Tb927.5.1360	nucleoside 2-deoxyribosyltransferase	Nucleotides	2.48269	0.00609801	3.16947
Tb927.7.4480	adenosine 5'-monophosphoramidase, putative	Nucleotides-Purines	3.43623	7.40788e-05	1.50907
Tb927.8.2980	Bis(5'-adenosyl)-triphosphatase, putative	Nucleotides-Purines	2.96119	0.00399431	0.837497
Tb927.7.1470	ATPase subunit 9, putative	Oxidative phosphorylation	2.66279	0.00198925	4.98295
Tb11.01.6220	procyclin-associated gene 4 (PAG4) protein, putative	PAG	2.5601	0.00691877	1.61196
Tb927.6.530	procyclin associated gene 3 (PAG3) protein ,procyclin PARP A ,procyclic acidic repetitive protein A	PAG	2.40995	0.00942185	1.60143
Tb927.3.4490	protein farnesyltransferase alpha subunit, putative	Prenylation	2.46132	0.00951937	0.822618
Tb927.8.2410	amidase, putative	Protease or peptidase	2.94921	0.0011642	2.09302
Tb927.8.1810	rhomboid-like protein ,serine peptidase, Clan S-, family S54, putative	Protease or peptidase	2.38216	0.00892229	1.614
Tb927.10.16160	protein kinase, putative	Protein kinase	2.95775	0.00237672	0.924301
Tb927.4.3680	protein phosphatase 2C, putative	Protein phosphatase	2.5174	0.00669016	0.995544
Tb09.v1.0380	spermidine synthase	Redox pathways	2.3877	0.00717341	4.53171
Tb09.160.2020	thioredoxin	Redox pathways	2.6075	0.00823191	1.35853
Tb11.01.7560	glutathione peroxidase, putative	Redox pathways	5.05081	9.82851e-06	1.26636
Tb927.10.10420	monothiol glutaredoxin, putative	Redox pathways	2.68937	0.00431071	1.19203
Tb927.3.3780	tryparedoxin	Redox pathways	3.56196	1.98979e-05	1
Tb927.3.3760	tryparedoxin	Redox pathways	3.65103	1.52e-05	1
Tb927.10.12680	60S ribosomal protein L34, putative	Ribosome	2.57037	0.00609801	1.57497
Tb11.01.1480	60S ribosomal protein L34, putative	Ribosome	2.90581	0.000762749	1.51899
Tb09.244.2725	ribosomal protein L36, putative	Ribosome	4.97676	2.30156e-06	1.33635
Tb11.02.0740	60S ribosomal protein L44	Ribosome	2.24644	0.00747122	1
Tb09.160.4200	60S acidic ribosomal protein, putative	Ribosome	2.39524	0.00403893	1
Tb09.211.2630	60S ribosomal protein L23, putative	Ribosome	2.50061	0.00381019	1
Tb927.8.6160	40S ribosomal protein S8, putative	Ribosome	2.53502	0.00323839	1
Tb09.211.2640	60S ribosomal protein L23, putative	Ribosome	2.54489	0.0029709	1
Tb927.8.6150	40S ribosomal protein S8, putative	Ribosome	2.57525	0.00256455	1
Tb927.7.5000	60S ribosomal protein L19, putative	Ribosome	2.59142	0.00426325	1
Tb927.7.5020	60S ribosomal protein L19, putative	Ribosome	2.78049	0.00164841	1
Tb927.10.5370	40S ribosomal protein S10, putative	Ribosome	2.91435	0.000512196	1
Tb927.10.5360	40S ribosomal protein S10, putative	Ribosome	2.9265	0.000483686	1
Tb927.5.1820	60S acidic ribosomal protein, putative	Ribosome	2.94133	0.000404622	1
Tb927.10.3380	60S acidic ribosomal protein P2, putative	Ribosome	2.97045	0.000362373	1
Tb927.10.3370	60S acidic ribosomal protein P2, putative	Ribosome	3.00902	0.000303959	1
Tb927.5.1110	60S ribosomal protein L2, putative ,60S ribosomal protein L8, putative	Ribosome	3.12856	0.000615884	1
Tb927.6.2100	40S ribosomal protein S30, putative	Ribosome	3.37905	0.00189521	1
Tb11.01.7960	60S ribosomal protein L2, putative ,60S ribosomal protein L8, putative	Ribosome	3.52077	0.00015979	1
Tb09.211.0865	60S ribosomal protein L37, putative	Ribosome	3.75504	2.94107e-05	1
Tb927.6.2110	40S ribosomal protein S30, putative	Ribosome	3.80002	0.000358336	1
Tb927.6.5120	60S acidic ribosomal protein P2, putative	Ribosome	3.86743	1.79784e-05	1
Tb927.6.5130	60S acidic ribosomal protein P2, putative	Ribosome	3.98893	1.25724e-05	1
Tb927.4.5170	ribosomal protein L7/L12, putative	Ribosome	4.02697	0.00155032	0.732541
Tb927.10.1590	ribosomal protein L36, putative	Ribosome	5.71297	4.34605e-07	0.0952236
Tb927.3.720	zinc finger protein 2, putative ,ZFP family member, putative	RNA binding	3.97932	1.38034e-05	1.94532
Tb11.02.2030	hypothetical protein, conserved	RNA binding	3.88524	1.01139e-05	1
Tb927.10.13570	RNA-binding protein, putative	RNA binding	2.86226	0.00206647	0.973496
Tb927.10.14080	RNA-binding protein, putative ,RBP27	RNA binding	2.89008	0.00186232	0.965107
Tb927.7.1180	RNA-binding protein, putative	RNA binding	2.9803	0.00373067	0.744649
Tb11.03.0550	RNA-binding protein, putative	RNA binding	3.0397	0.00120014	0.503369
Tb927.2.5850	small nuclear ribonucleoprotein SmD2	RNA processing	3.14721	0.000379407	4.11796
Tb927.3.3160	poly(A) polymerase ,polynucleotide adenylyltransferase	RNA processing	2.55109	0.00672205	1.74547
Tb927.7.6380	ssm4 protein, putative	RNA processing	3.56305	0.0005072	1.73473
Tb927.4.890	small nuclear ribonucleoprotein SmD3, putative	RNA processing	3.16544	0.00392646	1.31472
Tb11.01.4600	cleavage and polyadenylation specificity factor 30 kDa subunit ,CPSF 30 kDa subunit ,NS1 effector domain- binding protein 1	RNA processing	2.57933	0.00352934	1.05756
Tb927.10.4950	small nuclear ribonucleoprotein, putative	RNA processing	2.58131	0.00482678	0.855176
Tb11.01.1990	hypothetical protein, conserved	RNA synthesis	3.76404	7.40788e-05	1.98295
Tb927.3.5500	DNA-directed RNA polymerase II subunit 3, putative ,RNA polymerase subunit, putative	RNA synthesis II	2.3035	0.00867981	1.12715
Tb927.10.160	hypothetical protein, conserved	RNA synthesis II	2.55408	0.00825274	0.79753
Tb927.10.5210	hypothetical protein, conserved	RNA synthesis II	2.69199	0.00876507	0.741072
Tb927.10.7190	D-tyrosyl-tRNA deacylase, putative	rRNA-tRNA processing	3.42048	0.000737794	1.19655
Tb927.8.7570	tRNA-dihydrouridine synthase 1, putative	rRNA-tRNA processing	2.30334	0.00900596	0.922963
Tb09.160.2000	pseudouridylate synthase, putative	rRNA-tRNA processing	2.45282	0.00796796	0.845049
Tb927.8.2500	ribosomal RNA methyltransferase, putative	rRNA-tRNA processing	3.45031	0.000627329	0.836641
Tb927_08_v4.snoRNA.0002	C/D snoRNA	SNO	2.87234	0.00950929	13.5348
Tb927_08_v4.snoRNA.0004	C/D snoRNA	SNO	2.87234	0.00950929	13.5348
Tb927.8.1608	#N/A	SNO	2.87234	0.00950929	13.5348
Tb927.8.1617	#N/A	SNO	2.87234	0.00950929	13.5348
Tb927_06_v4.snoRNA.0012	H/ACA-like snoRNA	SNO	4.50234	0.000649836	1.94896
Tb927_06_v4.snoRNA.0013	H/ACA-like snoRNA	SNO	4.50234	0.000649836	1.94896
Tb927_06_v4.snoRNA.0014	H/ACA-like snoRNA	SNO	4.50234	0.000649836	1.94896
Tb927.6.1855	#N/A	SNO	4.50234	0.000649836	1.94896
Tb927.6.1863	#N/A	SNO	4.50234	0.000649836	1.94896
Tb927.6.1871	#N/A	SNO	4.50234	0.000649836	1.94896
Tb11_snoRNA_0017	C/D snoRNA, TB11C4C1	SNO	3.79962	0.00185188	1.24255
Tb11_snoRNA_0005	C/D snoRNA, TB11C4C1	SNO	3.8023	0.00156125	1.20224
Tb11_snoRNA_0011	C/D snoRNA, TB11C4C1	SNO	3.8023	0.00156125	1.20224
Tb11_snoRNA_0023	C/D snoRNA, TB11C4C1	SNO	3.8023	0.00156125	1.20224
Tb11_snoRNA_0029	C/D snoRNA, TB11C4C1	SNO	3.8023	0.00156125	1.20224
Tb10_snoRNA_0084:snoRNA	snoRNA	SNO	4.33362	0.0001393	0.240551
Tb927.5.3210	small ubiquitin-related modifier, putative	Ubiquitin & proteasome	2.36021	0.00902945	3.7593
Tb927.8.7000	E1-like ubiquitin-activating enzyme, putative	Ubiquitin & proteasome	2.60464	0.00728863	2.41162
Tb927.4.3460	ubiquitin-conjugating enzyme e2, putative ,ubiquitin carrier protein, putative ,ubiquitin-protein ligase, putative	Ubiquitin & proteasome	2.38183	0.00744629	2.17167
Tb927.4.3190	ubiquitin-conjugating enzyme e2, putative ,ubiquitin carrier protein, putative ,ubiquitin-protein ligase, putative	Ubiquitin & proteasome	2.87638	0.00185215	1.29703
Tb927.8.920	ubiquitin-conjugating enzyme e2, putative ,ubiquitin-protein ligase, putative ,ubiquitin carrier protein, putative	Ubiquitin & proteasome	2.57575	0.00686509	0.960865
Tb09.v1.0270	hypothetical protein, unlikely	unlikely	3.0301	0.0015037	1.25868
Tb09.160.1040	hypothetical protein, unlikely	unlikely	2.51989	0.00669016	1.1513
Tb927.1.230	hypothetical protein, unlikely	unlikely	3.40845	0.000259603	1.03738
Tb09.211.3960	hypothetical protein, unlikely	unlikely	5.10839	1.57372e-07	1
Tb927.1.2440	hypothetical protein, unlikely	unlikely	4.01714	9.14865e-06	0.838706
Tb927.1.2500	hypothetical protein, unlikely	unlikely	4.01714	9.14865e-06	0.838706
Tb927.1.2540	hypothetical protein, unlikely	unlikely	4.01714	9.14865e-06	0.838706
Tb927.1.2480	hypothetical protein, unlikely	unlikely	4.55304	8.61813e-07	0.834605
Tb927.1.2560	hypothetical protein, unlikely	unlikely	4.55304	8.61813e-07	0.834605
Tb09.211.3060	hypothetical protein, unlikely	unlikely	3.78958	0.00473344	0.831669
Tb927.1.2520	hypothetical protein, unlikely	unlikely	4.16722	4.36662e-06	0.779089
Tb927.1.2460	hypothetical protein, unlikely	unlikely	4.22073	3.3617e-06	0.759875
Tb09.160.1480	hypothetical protein, unlikely	unlikely	2.97528	0.0044903	0.437394
Tb927.1.200	hypothetical protein, unlikely	unlikely	8.20408	6.25553e-08	0.22409
Tb927.1.4660	hypothetical protein, unlikely	unlikely	4.23375	0.000236599	0.174656
Tb11.01.8120	18 kDa ER-associated protein	Vesicular transport	2.78041	0.00200329	6.00822
Tb11.01.8590	Rab-like 5, small G protein	Vesicular transport	2.5463	0.00439746	1.71156
Tb927.3.3720	Golgi vesicular membrane trafficking protein, putative	Vesicular transport	4.26952	0.00856946	0.908268
Tb11.01.1230	ADP-ribosylation factor GTPase activating protein, putative	Vesicular transport	3.58834	0.00119647	0.489907
Tb927.10.6380	hypothetical protein, conserved ,ring finger containing protein	Zinc finger	3.34587	0.000662623	0.81959
Tb927.7.1840	zinc finger protein, putative	Zinc finger	2.27858	0.00972616	0.789353
Tb927.7.1880	zinc finger protein, putative	Zinc finger	2.27858	0.00972616	0.789353

## Sheet: PAN2 down
geneID v5	Description	Class	foldChange (PAN2/WT)	padj	HL change (PAN2/WT)
Tb09.211.1800	hypothetical protein, conserved	0	0.0341326	1.35936e-10	11.4967
Tb927.2.5860	hypothetical protein, conserved	0	0.045133	1.45119e-06	10.6007
Tb927.4.2070	antigenic protein, putative	0	0.034771	3.98916e-08	5.06788
Tb927.1.1600	hypothetical protein, conserved	0	0.129031	4.01255e-09	4.62238
Tb11.03.0335	hypothetical protein, conserved	0	0.354441	0.00164413	3.83549
Tb927.10.1450	hypothetical protein, conserved	0	0.0328168	2.9167e-22	3.75233
Tb927.5.2510	hypothetical protein, conserved	0	0.340032	0.00284334	3.75068
Tb927.6.4100	hypothetical protein, conserved	0	0.100691	1.51932e-10	3.50656
Tb11.02.0690	hypothetical protein, conserved	0	0.174209	7.45198e-08	3.46614
Tb927.7.2110	hypothetical protein, conserved	0	0.153448	3.74448e-06	3.42433
Tb927.2.2580	hypothetical protein, conserved	0	0.239731	3.25277e-05	3.381
Tb927.8.2030	hypothetical protein, conserved	0	0.318317	0.000643438	3.33934
Tb927.1.750	hypothetical protein, conserved	0	0.104375	1.41529e-10	3.33463
Tb927.7.3330	hypothetical protein, conserved	0	0.0139743	1.28654e-33	3.32749
Tb11.52.0008	hypothetical protein, conserved	0	0.0428473	2.17867e-18	3.32022
Tb927.4.5340	hypothetical protein, conserved	0	0.192867	1.38519e-05	3.30387
Tb09.160.5330	hypothetical protein	0	0.334644	0.0037862	3.12658
Tb927.8.4240	hypothetical protein, conserved	0	0.300106	0.000232519	3.11518
Tb927.7.6590	hypothetical protein, conserved	0	0.0601103	1.08259e-13	3.01456
Tb09.211.3530	hypothetical protein, conserved	0	0.338679	0.00936389	3.00594
Tb927.7.4130	hypothetical protein, conserved	0	0.0524031	3.93346e-05	2.8704
Tb11.02.3500	hypothetical protein, conserved	0	0.124422	6.53207e-09	2.70113
Tb927.3.1680	hypothetical protein, conserved	0	0.246353	1.82493e-05	2.69259
Tb927.3.2490	hypothetical protein, conserved	0	0.11067	1.35936e-10	2.65629
Tb927.7.810	hypothetical protein, conserved	0	0.0421233	1.82493e-05	2.65417
Tb927.10.13710	hypothetical protein, conserved	0	0.25686	5.42308e-05	2.63918
Tb927.8.6980	hypothetical protein, conserved	0	0.140469	1.95234e-08	2.54946
Tb927.5.4520	hypothetical protein, conserved	0	0.101417	3.1231e-09	2.50723
Tb927.10.5850	hypothetical protein, conserved	0	0.136058	7.72549e-10	2.50018
Tb927.10.11250	hypothetical protein, conserved	0	0.056139	1.56047e-15	2.33556
Tb927.4.5380	hypothetical protein, conserved	0	0.218659	5.84325e-06	2.32507
Tb927.10.2080	hypothetical protein, conserved	0	0.325025	0.00422991	2.31183
Tb927.3.5160	hypothetical protein, conserved	0	0.191204	2.68964e-06	2.30499
Tb927.7.2240	hypothetical protein, conserved	0	0.22107	5.15735e-06	2.26292
Tb11.01.0820	hypothetical protein, conserved	0	0.118583	1.72783e-10	2.25666
Tb09.211.2700	hypothetical protein, conserved	0	0.202786	4.22505e-06	2.24451
Tb927.3.5400	hypothetical protein, conserved	0	0.285072	0.00109415	2.2269
Tb11.01.6490	hypothetical protein, conserved	0	0.162961	2.33249e-06	2.21806
Tb927.8.6940	hypothetical protein, conserved	0	0.230156	1.16357e-05	2.15079
Tb09.211.3720	hypothetical protein, conserved	0	0.127475	8.63188e-05	2.13833
Tb927.5.3230	hypothetical protein, conserved	0	0.116307	1.21059e-10	2.11573
Tb927.5.2300	formin, putative	0	0.197863	0.00936389	2.08966
Tb11.01.5270	hypothetical protein, conserved	0	0.1133	0.000487545	2.0833
Tb11.02.0110	hypothetical protein, conserved	0	0.185801	2.66975e-07	2.07116
Tb927.6.2650	hypothetical protein, conserved	0	0.229566	7.53509e-05	2.06197
Tb927.5.3280	hypothetical protein, conserved	0	0.125704	8.45745e-10	2.01078
Tb927.6.4550	hypothetical protein, conserved	0	0.104807	7.35064e-11	2.0103
Tb927.6.2760	hypothetical protein, conserved	0	0.175789	8.16925e-07	2.0035
Tb09.211.1910	hypothetical protein, conserved	0	0.227708	0.000428645	1.99855
Tb927.7.900	hypothetical protein, conserved	0	0.401661	0.00819535	1.99799
Tb09.211.0580	hypothetical protein, conserved	0	0.26241	0.00284504	1.9948
Tb927.10.850	hypothetical protein, conserved	0	0.171063	0.00155791	1.96282
Tb09.211.3320	hypothetical protein, conserved	0	0.155926	0.00253412	1.95343
Tb927.8.3990	hypothetical protein, conserved	0	0.297186	0.000698141	1.9504
Tb09.211.1230	hypothetical protein, conserved	0	0.119232	1.97207e-07	1.94602
Tb927.5.2710	hypothetical protein, conserved	0	0.169667	1.15695e-05	1.93308
Tb927.8.2220	hypothetical protein, conserved	0	0.275152	0.00141604	1.92899
Tb927.8.4960	hypothetical protein, conserved	0	0.387191	0.00222934	1.90208
Tb927.10.2650	hypothetical protein, conserved	0	0.104525	1.19268e-11	1.87778
Tb11.01.6050	hypothetical protein, conserved	0	0.143015	2.06787e-08	1.87411
Tb927.5.2890	hypothetical protein, conserved	0	0.162683	1.23274e-08	1.82644
Tb927.10.870	hypothetical protein, conserved	0	0.099405	0.00094126	1.82533
Tb927.7.2170	hypothetical protein, conserved	0	0.151413	7.73479e-09	1.81737
Tb09.160.4210	hypothetical protein, conserved	0	0.261368	3.04092e-05	1.81565
Tb11.02.3520	hypothetical protein, conserved	0	0.15281	8.38153e-09	1.81209
Tb927.7.6580	hypothetical protein	0	0.056622	6.16726e-15	1.81063
Tb11.01.6520	hypothetical protein, conserved	0	0.297413	0.00121632	1.80485
Tb927.3.4800	hypothetical protein, conserved	0	0.33782	0.00482678	1.80203
Tb927.6.1100	hypothetical protein, conserved	0	0.296512	0.00235121	1.78788
Tb927.5.2530	hypothetical protein, conserved	0	0.377363	0.00850038	1.76505
Tb927.7.650	hypothetical protein, conserved	0	0.214823	2.74913e-06	1.75729
Tb09.160.3240	hypothetical protein, conserved	0	0.179915	3.817e-07	1.75678
Tb11.01.4380	hypothetical protein	0	0.22374	2.14614e-05	1.75215
Tb927.6.1860	hypothetical protein, conserved	0	0.274081	0.00117707	1.7485
Tb927.10.13550	hypothetical protein, conserved ,hypothetical protein	0	0.265878	0.000193671	1.74785
Tb927.4.3800	hypothetical protein, conserved	0	0.374453	0.00781618	1.73453
Tb09.160.4550	hypothetical protein, conserved	0	0.269183	4.3302e-05	1.72018
Tb11.01.7095	hypothetical protein	0	0.0425633	0.000679675	1.7145
Tb927.8.5850	hypothetical protein, conserved	0	0.154772	8.78401e-09	1.70502
Tb927.2.4050	hypothetical protein, conserved	0	0.0720245	1.56711e-10	1.70072
Tb927.8.1210	hypothetical protein, conserved	0	0.0730066	9.13293e-15	1.6915
Tb11.47.0011	hypothetical protein, conserved	0	0.0616385	4.10361e-16	1.68741
Tb927.10.8000	hypothetical protein, conserved	0	0.144076	3.15825e-09	1.67734
Tb927.5.150	hypothetical protein, conserved	0	0.17167	2.92912e-05	1.67688
Tb927.8.940	hypothetical protein, conserved	0	0.209349	1.1898e-06	1.65752
Tb11.47.0033	hypothetical protein, conserved	0	0.182646	4.65699e-07	1.64134
Tb927.4.590	hypothetical protein, conserved	0	0.27744	0.00172707	1.64048
Tb11.02.5540	hypothetical protein, conserved	0	0.370345	0.00624451	1.6365
Tb11.02.1410	hypothetical protein, conserved	0	0.225718	4.50217e-06	1.63371
Tb927.8.960	hypothetical protein, conserved	0	0.198918	5.33126e-07	1.62194
Tb927.7.4120	hypothetical protein, conserved	0	0.372956	0.00571825	1.61186
Tb927.5.2520	hypothetical protein, conserved	0	0.182695	2.38219e-06	1.60946
Tb927.5.2460	hypothetical protein, conserved	0	0.182951	0.003036	1.59998
Tb09.160.4870	hypothetical protein, conserved	0	0.383175	0.00119729	1.59756
Tb927.8.540	hypothetical protein, conserved	0	0.163622	3.89093e-08	1.58164
Tb927.10.13270	periodic tryptophan protein 2, putative ,predicted WD40 repeat protein ,predicted involvement in cytokinesis ,predicted involvement in cell separation	0	0.308476	0.000698141	1.5783
Tb927.6.3090	hypothetical protein, conserved	0	0.102511	4.75701e-08	1.57769
Tb927.7.3560	hypothetical protein, conserved	0	0.100015	9.03834e-08	1.56601
Tb927.6.1480	hypothetical protein, conserved	0	0.27591	2.17618e-05	1.56451
Tb927.7.3370	hypothetical protein, conserved	0	0.198919	3.65939e-07	1.54244
Tb09.211.4810	hypothetical protein, conserved	0	0.252493	1.0394e-05	1.53012
Tb927.3.1620	hypothetical protein, conserved	0	0.268263	0.000180668	1.52872
Tb927.6.3880	hypothetical protein, conserved	0	0.270013	0.00140567	1.52788
Tb11.02.2920	hypothetical protein, conserved	0	0.171169	1.51124e-05	1.52772
Tb927.6.4520	hypothetical protein, conserved	0	0.348867	0.00365604	1.52707
Tb11.02.1720	hypothetical protein, conserved	0	0.304109	0.000559532	1.52049
Tb927.8.2390	hypothetical protein, conserved	0	0.394442	0.00289907	1.50955
Tb927.5.2660	hypothetical protein, conserved	0	0.158852	0.00210591	1.50561
Tb927.10.8780	hypothetical protein, conserved	0	0.215384	0.00225509	1.50166
Tb927.3.4620	hypothetical protein, conserved	0	0.198162	3.76983e-07	1.49983
Tb927.3.1580	hypothetical protein, conserved	0	0.208241	2.10385e-05	1.49967
Tb09.211.0180	hypothetical protein, conserved	0	0.122114	1.85253e-07	1.47817
Tb11.01.7050	hypothetical protein, conserved	0	0.445408	0.00612691	1.47256
Tb11.02.4550	hypothetical protein, conserved	0	0.374025	0.00691688	1.47089
Tb927.6.3020	hypothetical protein, conserved	0	0.252585	0.000209277	1.47086
Tb927.10.1330	hypothetical protein, conserved	0	0.342357	0.00422991	1.47017
Tb927.7.6490	hypothetical protein, conserved	0	0.204135	2.48489e-05	1.46785
Tb09.211.1930	hypothetical protein, conserved	0	0.24277	6.19609e-05	1.46699
Tb09.211.4440	hypothetical protein, conserved	0	0.203256	7.29184e-07	1.46317
Tb927.10.15550	hypothetical protein, conserved	0	0.270024	3.01699e-05	1.45306
Tb927.8.5100	hypothetical protein, conserved	0	0.211029	0.000607194	1.45032
Tb927.7.7050	hypothetical protein, conserved	0	0.170231	1.99629e-07	1.44924
Tb927.10.840	hypothetical protein, conserved	0	0.0883276	2.18128e-07	1.44587
Tb927.5.2750	hypothetical protein, conserved	0	0.334772	0.00370277	1.44522
Tb927.2.2090	hypothetical protein	0	0.194482	5.19512e-06	1.43745
Tb09.160.0400	hypothetical protein, conserved	0	0.265742	0.000174062	1.43698
Tb11.01.4480	hypothetical protein, conserved	0	0.302699	0.000151955	1.43485
Tb927.7.3130	hypothetical protein, conserved	0	0.359344	0.00318251	1.43231
Tb927.6.3280	cyclosome subunit 1, putative	0	0.180141	1.02367e-06	1.43182
Tb11.01.3470	hypothetical protein, conserved	0	0.0490662	0.00409258	1.42829
Tb927.5.4570	hypothetical protein, conserved	0	0.28878	9.88568e-05	1.42538
Tb11.01.8780	hypothetical protein, conserved	0	0.242792	0.00545881	1.42452
Tb09.211.0850	hypothetical protein, conserved	0	0.186339	2.78424e-06	1.42354
Tb927.10.13280	hypothetical protein, conserved	0	0.103062	1.17251e-12	1.41526
Tb11.01.4400	hypothetical protein	0	0.246528	4.83301e-06	1.41513
Tb927.7.4450	hypothetical protein, conserved	0	0.327325	0.00130704	1.41374
Tb927.10.12120	hypothetical protein, conserved	0	0.108491	1.00384e-11	1.41285
Tb927.10.3820	hypothetical protein, conserved	0	0.222049	9.11506e-07	1.41026
Tb927.10.12720	hypothetical protein, conserved	0	0.185335	2.60689e-06	1.40218
Tb927.10.12950	hypothetical protein, conserved	0	0.219108	2.93137e-06	1.39384
Tb09.211.4280	hypothetical protein, conserved	0	0.104814	6.32749e-08	1.3925
Tb927.1.1910	hypothetical protein, conserved	0	0.342645	0.0012142	1.38984
Tb927.6.3590	hypothetical protein, conserved	0	0.178292	2.79754e-07	1.38567
Tb927.2.5150	TPR-repeat protein, putative	0	0.266619	0.000219105	1.38565
Tb927.10.9890	hypothetical protein, conserved	0	0.338732	0.0025892	1.38551
Tb927.10.13450	hypothetical protein, conserved ,hypothetical protein	0	0.261491	0.000127257	1.38182
Tb927.5.2310	hypothetical protein, conserved	0	0.384986	0.0057596	1.38025
Tb11.02.5580	hypothetical protein, conserved	0	0.329667	0.000615884	1.37452
Tb11.02.5040	hypothetical protein, conserved	0	0.252352	0.000162429	1.36801
Tb11.02.3410	hypothetical protein, conserved	0	0.2948	0.000232519	1.36766
Tb927.5.2980	hypothetical protein, conserved	0	0.262879	0.000247986	1.36563
Tb927.8.6470	hypothetical protein, conserved	0	0.308441	0.000771395	1.36422
Tb927.10.6000	hypothetical protein, conserved	0	0.262292	1.87603e-05	1.3623
Tb11.02.3470	formin, putative ,formin-like protein	0	0.211525	2.16686e-06	1.36136
Tb927.3.5620	hypothetical protein, conserved	0	0.397631	0.0039475	1.35945
Tb09.160.0520	hypothetical protein, conserved	0	0.0969197	0.000887763	1.35843
Tb927.10.570	hypothetical protein, conserved	0	0.239123	1.54387e-05	1.35761
Tb927.1.1840	hypothetical protein, conserved	0	0.290474	0.000478058	1.35744
Tb927.10.4170	hypothetical protein, conserved	0	0.146722	4.87243e-08	1.35614
Tb927.10.10290	hypothetical protein, conserved	0	0.256047	0.000803676	1.35522
Tb11.01.5930	hypothetical protein, conserved	0	0.143024	1.1344e-09	1.35395
Tb927.8.3010	hypothetical protein, conserved	0	0.193693	1.1898e-06	1.35287
Tb11.02.3710	hypothetical protein, conserved	0	0.309968	0.00202607	1.34795
Tb11.01.2810	hypothetical protein, conserved	0	0.188427	2.20083e-07	1.34696
Tb927.8.3980	hypothetical protein, conserved	0	0.236018	5.27169e-05	1.34613
Tb927.10.8910	hypothetical protein, conserved	0	0.337032	0.000358645	1.34562
Tb11.01.3720	hypothetical protein	0	0.385793	0.00394744	1.34149
Tb927.10.3130	hypothetical protein, conserved	0	0.207462	9.13787e-06	1.34094
Tb09.160.4710	hypothetical protein, conserved	0	0.12639	9.78654e-06	1.34062
Tb927.7.5320	hypothetical protein, conserved	0	0.386747	0.00630405	1.34061
Tb09.211.1870	hypothetical protein, conserved	0	0.28237	0.000698141	1.33766
Tb11.01.0180	hypothetical protein, conserved	0	0.255797	3.88365e-05	1.33612
Tb09.211.2550	hypothetical protein, conserved ,predicted WD40 repeat protein	0	0.334381	0.00205176	1.33065
Tb927.10.15660	hypothetical protein, conserved	0	0.185819	1.19638e-06	1.33014
Tb927.2.1250	hypothetical protein	0	0.290409	0.00964816	1.32979
Tb927.2.4520	hypothetical protein, conserved	0	0.240214	3.30277e-05	1.3251
Tb927.8.1410	hypothetical protein, conserved	0	0.346489	0.00210952	1.32167
Tb927.1.1710	hypothetical protein, conserved	0	0.415311	0.00464853	1.32138
Tb927.6.3220	hypothetical protein, conserved	0	0.213383	8.30855e-06	1.3204
Tb927.10.9650	hypothetical protein, conserved	0	0.400066	0.00289705	1.31978
Tb927.10.3310	hypothetical protein, conserved	0	0.163379	3.15906e-07	1.31624
Tb927.10.3780	hypothetical protein, conserved	0	0.273844	0.00478978	1.31526
Tb927.10.3800	hypothetical protein, conserved ,predicted RING finger protein	0	0.194028	0.000326106	1.30928
Tb11.22.0010	hypothetical protein, conserved	0	0.162104	0.000409618	1.30795
Tb11.01.6710	hypothetical protein, conserved	0	0.388921	0.00668783	1.30666
Tb11.01.6550	hypothetical protein, conserved	0	0.132351	4.0447e-10	1.30592
Tb09.160.0350	hypothetical protein, conserved	0	0.321916	0.00821999	1.30346
Tb11.02.0980	hypothetical protein, conserved	0	0.306515	0.00026446	1.30012
Tb927.10.12520	hypothetical protein, conserved	0	0.401997	0.00843319	1.29338
Tb927.8.2430	hypothetical protein, conserved	0	0.223494	0.000481728	1.29268
Tb927.4.2770	hypothetical protein, conserved	0	0.377532	0.00861753	1.29151
Tb927.10.9690	hypothetical protein, conserved ,predicted C2 domain protein	0	0.214	7.14017e-06	1.28935
Tb927.10.2590	hypothetical protein, conserved	0	0.35679	0.00624658	1.28818
Tb927.7.5610	hypothetical protein, conserved	0	0.210522	4.46924e-06	1.2871
Tb11.01.6280	hypothetical protein, conserved	0	0.416362	0.00715861	1.28495
Tb927.10.1320	hypothetical protein, conserved	0	0.359131	0.00372492	1.28314
Tb11.02.1540	hypothetical protein, conserved	0	0.125806	0.00235121	1.28115
Tb927.4.2990	hypothetical protein, conserved	0	0.253982	0.00397097	1.28047
Tb927.10.8240	hypothetical protein, conserved	0	0.125974	0.00012535	1.28009
Tb927.4.310	hypothetical protein, conserved	0	0.147653	1.61169e-09	1.2778
Tb927.10.12060	hypothetical protein, conserved	0	0.414015	0.00692007	1.27092
Tb09.160.2960	hypothetical protein, conserved	0	0.338255	0.00111429	1.26613
Tb927.7.4030	hypothetical protein, conserved	0	0.352439	0.00485639	1.26201
Tb927.1.2980	hypothetical protein, conserved	0	0.407431	0.00781618	1.25995
Tb927.10.7290	hypothetical protein, conserved	0	0.398906	0.00317175	1.25762
Tb927.5.1270	hypothetical protein, conserved	0	0.284645	0.00459152	1.2553
Tb11.01.3520	hypothetical protein, conserved	0	0.306847	0.00205119	1.2511
Tb927.10.10370	hypothetical protein, conserved	0	0.296971	0.00124471	1.24944
Tb927.10.5390	hypothetical protein, conserved	0	0.325189	0.000514425	1.24858
Tb927.2.3020	hypothetical protein, conserved	0	0.30608	0.000585023	1.24626
Tb11.47.0032	hypothetical protein, conserved	0	0.266247	0.000194329	1.24578
Tb927.6.5150	hypothetical protein, conserved	0	0.173959	2.46128e-08	1.24227
Tb11.02.0350	hypothetical protein, conserved	0	0.120446	1.95234e-08	1.23759
Tb09.160.1010	hypothetical protein, conserved	0	0.291716	0.00496795	1.23584
Tb927.3.4610	hypothetical protein, conserved	0	0.175468	2.20937e-06	1.23509
Tb927.5.3330	hypothetical protein, conserved	0	0.108068	1.32403e-11	1.23474
Tb927.8.7950	hypothetical protein, conserved	0	0.221731	2.59376e-06	1.23073
Tb927.1.4480	hypothetical protein, conserved	0	0.246791	0.00134225	1.23006
Tb11.02.4540	hypothetical protein, conserved ,predicted tetratricopeptide repeat (TPR) protein	0	0.330586	0.00576386	1.22697
Tb927.7.500	hypothetical protein, conserved	0	0.154219	0.00289876	1.2224
Tb927.3.1800	hypothetical protein, conserved	0	0.249921	1.03437e-05	1.22021
Tb11.02.2100	hypothetical protein, conserved	0	0.44062	0.00696359	1.21894
Tb927.8.610	hypothetical protein, conserved	0	0.202811	1.8558e-06	1.21322
Tb927.10.3330	hypothetical protein, conserved	0	0.265544	0.00594362	1.21298
Tb927.2.4340	hypothetical protein, conserved	0	0.287081	0.000858588	1.21062
Tb11.01.2250	hypothetical protein, conserved	0	0.337874	0.000546489	1.20952
Tb927.6.3780	hypothetical protein, conserved	0	0.320839	0.00300865	1.20873
Tb927.4.2430	hypothetical protein, conserved	0	0.220048	1.1814e-05	1.20816
Tb927.2.3990	hypothetical protein, conserved	0	0.169204	0.00153975	1.20652
Tb927.8.6790	hypothetical protein, conserved	0	0.364505	0.00143886	1.20427
Tb927.10.4200	hypothetical protein, conserved	0	0.0832833	2.10978e-11	1.20342
Tb09.211.3160	hypothetical protein, conserved	0	0.358343	0.00350957	1.20021
Tb927.10.5260	hypothetical protein, conserved	0	0.185271	3.60883e-07	1.19734
Tb927.8.2060	hypothetical protein, conserved	0	0.282887	6.69321e-05	1.19661
Tb927.4.2060	hypothetical protein, conserved	0	0.386289	0.00422991	1.19564
Tb11.01.4310	hypothetical protein, conserved	0	0.204794	4.19524e-07	1.19473
Tb09.211.1830	hypothetical protein, conserved	0	0.234083	5.65756e-06	1.18896
Tb927.7.4370	hypothetical protein, conserved	0	0.152904	1.27124e-08	1.18647
Tb927.4.4930	hypothetical protein, conserved	0	0.356685	0.000584342	1.1861
Tb11.01.5770	hypothetical protein, conserved	0	0.287987	0.000318468	1.18455
Tb09.211.1620	hypothetical protein, conserved	0	0.216015	8.98578e-07	1.18246
Tb11.01.2350	hypothetical protein, conserved	0	0.283505	0.000284921	1.18017
Tb927.8.1050	hypothetical protein, conserved	0	0.193912	9.92736e-08	1.17914
Tb11.02.0020	hypothetical protein, conserved	0	0.269664	0.000138924	1.17726
Tb927.10.3480	hypothetical protein, conserved	0	0.275444	0.000481728	1.17698
Tb09.211.4180	hypothetical protein, conserved	0	0.237538	5.08955e-05	1.17423
Tb927.10.9000	hypothetical protein, conserved	0	0.324639	0.000649836	1.17399
Tb11.01.1880	hypothetical protein, conserved	0	0.194118	4.73251e-07	1.17395
Tb927.6.650	hypothetical protein, conserved	0	0.371163	0.000895102	1.16386
Tb11.03.0800	hypothetical protein, conserved	0	0.278343	0.000611381	1.16356
Tb927.10.4080	hypothetical protein, conserved	0	0.362474	0.00100575	1.16247
Tb11.02.2670	hypothetical protein, conserved	0	0.170255	4.52132e-08	1.16228
Tb11.02.3550	hypothetical protein, conserved	0	0.356958	0.00608843	1.16182
Tb927.8.2660	hypothetical protein, conserved	0	0.290456	0.00773569	1.16163
Tb09.211.3490	hypothetical protein, conserved	0	0.3742	0.00649482	1.16111
Tb927.4.620	hypothetical protein, conserved	0	0.258124	1.87619e-05	1.15966
Tb927.7.2410	hypothetical protein, conserved	0	0.337195	0.006856	1.15879
Tb927.1.4760	hypothetical protein, conserved	0	0.380194	0.00514464	1.15384
Tb927.10.3090	hypothetical protein, conserved	0	0.324881	0.00316305	1.15366
Tb927.5.1920	hypothetical protein, conserved	0	0.308289	0.00514464	1.15266
Tb927.2.5870	hypothetical protein, conserved	0	0.0961136	1.69852e-12	1.15134
Tb927.7.7400	hypothetical protein, conserved	0	0.0645469	2.3171e-15	1.15104
Tb927.7.5440	hypothetical protein, conserved	0	0.235472	9.13787e-06	1.14977
Tb927.10.5450	hypothetical protein, conserved	0	0.15378	2.41628e-08	1.14748
Tb927.8.4560	hypothetical protein, conserved	0	0.316549	0.000408804	1.14678
Tb927.8.7490	hypothetical protein, conserved	0	0.356238	0.000453427	1.14463
Tb927.10.14230	hypothetical protein, conserved	0	0.234769	2.11696e-06	1.13795
Tb927.10.9670	hypothetical protein, conserved	0	0.214641	0.000231374	1.1378
Tb11.01.0690	hypothetical protein, conserved	0	0.451046	0.00845124	1.1367
Tb927.10.6790	hypothetical protein, conserved	0	0.309059	0.000103622	1.13659
Tb09.211.2960	hypothetical protein, conserved	0	0.245495	0.000766125	1.13483
Tb927.10.12870	hypothetical protein, conserved	0	0.422102	0.00443623	1.13072
Tb11.01.0890	hypothetical protein, conserved	0	0.386046	0.00233721	1.12907
Tb927.1.1880	hypothetical protein, conserved	0	0.260088	0.0001921	1.1283
Tb09.211.2790	hypothetical protein, conserved	0	0.429057	0.0065592	1.12543
Tb927.10.15750	hypothetical protein, conserved	0	0.042649	1.38554e-05	1.12445
Tb927.10.15000	hypothetical protein, conserved	0	0.353927	0.00494128	1.12161
Tb927.10.13070	hypothetical protein, conserved	0	0.389464	0.00176113	1.12146
Tb927.4.4400	hypothetical protein, conserved	0	0.217624	3.09884e-06	1.12086
Tb927.5.1850	hypothetical protein, conserved	0	0.0758033	2.06787e-08	1.12061
Tb11.01.8690	hypothetical protein, conserved	0	0.391911	0.00697753	1.11653
Tb11.01.2430	hypothetical protein, conserved	0	0.150116	0.00251709	1.11595
Tb927.7.5390	hypothetical protein, conserved	0	0.270207	0.000261926	1.11435
Tb927.6.2210	hypothetical protein, conserved	0	0.389845	0.00416597	1.11417
Tb927.10.15290	hypothetical protein, conserved	0	0.189602	1.00889e-07	1.1129
Tb11.01.6310	hypothetical protein, conserved	0	0.3548	0.00316829	1.11223
Tb927.10.15700	hypothetical protein, conserved	0	0.0361833	3.134e-13	1.10962
Tb927.7.2120	hypothetical protein, conserved	0	0.325975	0.00235121	1.10774
Tb927.8.5940	hypothetical protein, conserved	0	0.200291	1.59812e-05	1.10686
Tb11.01.6200	hypothetical protein, conserved	0	0.207367	1.32045e-06	1.10673
Tb927.3.1670	hypothetical protein, conserved	0	0.279553	0.000121449	1.09602
Tb927.10.970	hypothetical protein, conserved	0	0.221355	9.78398e-07	1.09406
Tb927.1.880	hypothetical protein, conserved	0	0.125846	1.60624e-10	1.09279
Tb927.3.1860	hypothetical protein, conserved	0	0.36109	0.00337335	1.09157
Tb927.7.5590	hypothetical protein, conserved	0	0.278535	0.00219022	1.0863
Tb927.8.780	hypothetical protein, conserved	0	0.200018	1.22399e-05	1.08618
Tb09.211.0610	hypothetical protein, conserved	0	0.246491	8.74357e-05	1.08187
Tb927.10.8390	hypothetical protein, conserved	0	0.181302	3.98916e-08	1.0812
Tb11.02.4280	hypothetical protein, conserved	0	0.217681	3.94747e-07	1.07526
Tb927.1.1670	hypothetical protein, conserved	0	0.373872	0.00187918	1.07366
Tb09.211.3890	hypothetical protein, conserved	0	0.24133	1.82493e-05	1.07247
Tb09.160.0750	hypothetical protein, conserved	0	0.358606	0.00368311	1.07132
Tb927.4.3120	hypothetical protein, conserved	0	0.240042	4.4659e-05	1.07119
Tb927.8.2870	hypothetical protein, conserved	0	0.306058	0.00744629	1.07063
Tb11.01.6840	hypothetical protein, conserved	0	0.347857	0.0034362	1.07026
Tb09.160.1560	hypothetical protein, conserved	0	0.218037	1.80177e-06	1.06336
Tb11.47.0013	hypothetical protein, conserved	0	0.344166	0.00635712	1.05734
Tb11.02.2090	hypothetical protein, conserved	0	0.235856	0.000850842	1.05351
Tb927.8.6330	hypothetical protein, conserved	0	0.424182	0.00334396	1.05182
Tb927.6.3520	hypothetical protein, conserved	0	0.351007	0.00422991	1.05026
Tb11.02.3330	hypothetical protein, conserved	0	0.275204	0.000379407	1.04945
Tb11.01.0790	hypothetical protein, conserved	0	0.306761	0.00193211	1.04903
Tb927.2.2380	hypothetical protein, conserved	0	0.352954	0.00360883	1.04818
Tb11.01.7250	hypothetical protein, conserved	0	0.399115	0.00426631	1.04801
Tb927.7.4600	hypothetical protein, conserved	0	0.306921	0.00321231	1.04569
Tb11.01.2360	hypothetical protein, conserved	0	0.348702	0.00290551	1.04365
Tb11.01.3730	hypothetical protein, conserved	0	0.373434	0.00164841	1.04164
Tb11.02.1660	hypothetical protein, conserved	0	0.135253	4.10702e-05	1.04163
Tb927.3.5020	hypothetical protein, conserved	0	0.362117	0.000514425	1.04027
Tb11.02.0220	hypothetical protein, conserved	0	0.180792	1.72991e-06	1.0396
Tb11.22.0002	hypothetical protein, conserved	0	0.296973	0.00115545	1.0372
Tb11.02.3880	hypothetical protein, conserved	0	0.292413	4.3988e-05	1.03497
Tb927.3.2730	hypothetical protein, conserved	0	0.365123	0.000897989	1.03387
Tb11.01.5240	hypothetical protein, conserved	0	0.201666	3.23302e-07	1.02929
Tb927.1.3260	hypothetical protein, conserved	0	0.32363	0.00293246	1.02747
Tb927.6.2930	hypothetical protein, conserved	0	0.350536	0.00775063	1.02581
Tb927.5.3290	hypothetical protein, conserved	0	0.266241	2.58881e-05	1.02453
Tb927.7.3980	immunodominant antigen, putative ,tc40 antigen-like	0	0.429383	0.00612736	1.02214
Tb11.47.0026	hypothetical protein, conserved	0	0.236291	1.84327e-05	1.02126
Tb927.10.1350	hypothetical protein, conserved	0	0.256442	6.19609e-05	1.01776
Tb927.1.3290	hypothetical protein, conserved	0	0.372961	0.00306538	1.01598
Tb927.1.3880	hypothetical protein, conserved	0	0.33463	0.00709025	1.01593
Tb11.01.6340	hypothetical protein, conserved	0	0.295448	0.00258389	1.01591
Tb927.10.15280	hypothetical protein, conserved	0	0.402849	0.00729505	1.01515
Tb927.10.8820	hypothetical protein, conserved	0	0.395478	0.00321393	1.01328
Tb927.5.4470	hypothetical protein, conserved	0	0.330616	0.00110601	1.01287
Tb927.7.3400	hypothetical protein, conserved	0	0.316851	0.00235429	1.01248
Tb927.10.11580	hypothetical protein, conserved ,predicted WD40 repeat protein	0	0.286355	5.26022e-05	1.01161
Tb11.01.3670	hypothetical protein, conserved	0	0.375953	0.00379992	1.00884
Tb927.2.2230	hypothetical protein, conserved	0	0.395077	0.0073852	1.00053
Tb927.7.2650	hypothetical protein, conserved	0	0.20228	6.67887e-08	1
Tb927.10.2260	hypothetical protein, conserved	0	0.312352	0.00130512	0.994357
Tb927.5.4580	hypothetical protein, conserved	0	0.409973	0.00715861	0.988253
Tb927.8.3710	hypothetical protein, conserved	0	0.342692	0.00253245	0.986421
Tb927.7.7100	hypothetical protein	0	0.228071	7.03281e-05	0.985161
Tb927.7.720	hypothetical protein, conserved	0	0.279945	0.000420316	0.982737
Tb927.5.2330	hypothetical protein, conserved	0	0.199295	7.41419e-07	0.980983
Tb927.7.5090	hypothetical protein, conserved	0	0.395715	0.00391297	0.980597
Tb927.5.570	hypothetical protein, conserved	0	0.196533	3.79323e-05	0.974512
Tb927.8.2880	hypothetical protein, conserved	0	0.298556	0.00091648	0.973176
Tb09.211.3750	hypothetical protein, conserved	0	0.405792	0.00633029	0.971121
Tb927.10.2600	hypothetical protein, conserved	0	0.287997	0.00130824	0.970419
Tb927.10.13590	hypothetical protein, conserved ,hypothetical protein	0	0.392798	0.00523032	0.967968
Tb927.3.1190	hypothetical protein, conserved	0	0.253277	1.40146e-05	0.96444
Tb927.10.2870	hypothetical protein, conserved	0	0.36301	0.00539103	0.963011
Tb927.7.6260	hypothetical protein, conserved	0	0.415187	0.00890068	0.96098
Tb927.8.1480	hypothetical protein, conserved	0	0.394269	0.00312303	0.958488
Tb927.7.1420	hypothetical protein, conserved	0	0.290901	3.18385e-05	0.958062
Tb927.10.3790	hypothetical protein, conserved	0	0.262134	0.000498686	0.945598
Tb927.3.1320	hypothetical protein, conserved	0	0.324776	0.0012142	0.944778
Tb927.8.790	hypothetical protein, conserved	0	0.35027	0.00155591	0.942572
Tb927.5.1760	hypothetical protein, conserved	0	0.183503	1.3888e-07	0.941343
Tb927.4.670	hypothetical protein, conserved	0	0.376002	0.00357304	0.93937
Tb927.8.6260	hypothetical protein, conserved	0	0.182042	2.39955e-06	0.938688
Tb927.8.3700	hypothetical protein, conserved	0	0.288678	0.000134946	0.935915
Tb927.7.4360	hypothetical protein, conserved	0	0.231042	0.000255557	0.935726
Tb927.10.2920	hypothetical protein, conserved	0	0.313535	0.000612971	0.93544
Tb927.7.2350	hypothetical protein, conserved	0	0.376857	0.00555326	0.929835
Tb927.7.6090	hypothetical protein, conserved	0	0.232061	7.70802e-06	0.929651
Tb927.7.4220	hypothetical protein, conserved	0	0.405688	0.0049866	0.929445
Tb927.7.7270	hypothetical protein, conserved	0	0.378821	0.00653275	0.923945
Tb09.211.3940	hypothetical protein, conserved	0	0.294484	0.000139363	0.923648
Tb927.4.2640	hypothetical protein, conserved	0	0.400039	0.00624882	0.923528
Tb11.01.5970	hypothetical protein, conserved	0	0.192331	0.000165184	0.92106
Tb927.10.3870	hypothetical protein, conserved	0	0.19416	0.00342639	0.916094
Tb927.7.5660	hypothetical protein, conserved	0	0.274442	0.000698141	0.911472
Tb11.02.1980	hypothetical protein, conserved	0	0.378903	0.00465823	0.908781
Tb11.01.4140	hypothetical protein, conserved	0	0.397471	0.00715861	0.907823
Tb11.01.2730	hypothetical protein, conserved	0	0.102832	4.41276e-11	0.88951
Tb927.10.9700	hypothetical protein, conserved ,predicted C2 domain protein	0	0.258234	0.00012348	0.887177
Tb09.244.2580	hypothetical protein, conserved	0	0.390979	0.00861753	0.879656
Tb927.2.2650	hypothetical protein, conserved	0	0.31034	9.58472e-05	0.872715
Tb927.5.3250	hypothetical protein, conserved	0	0.207105	0.00781618	0.871499
Tb11.01.5000	hypothetical protein, conserved	0	0.377047	0.00184813	0.865291
Tb927.4.2300	hypothetical protein, conserved	0	0.389812	0.00599089	0.85631
Tb927.8.6600	hypothetical protein, conserved	0	0.29362	0.00196956	0.854113
Tb11.01.3100	hypothetical protein, conserved	0	0.341149	0.00638309	0.85209
Tb11.02.0190	hypothetical protein, conserved	0	0.351304	0.00263036	0.846979
Tb927.10.5550	hypothetical protein, conserved	0	0.328827	0.00249739	0.845944
Tb11.01.4740	hypothetical protein, conserved	0	0.32405	0.000698141	0.844235
Tb927.3.4510	hypothetical protein, conserved	0	0.216376	0.00729384	0.843421
Tb927.10.9910	hypothetical protein, conserved	0	0.384786	0.00394403	0.84314
Tb927.10.2950	hypothetical protein, conserved	0	0.178999	0.00012348	0.8325
Tb927.1.3730	hypothetical protein	0	0.408546	0.00425942	0.816592
Tb927.3.3110	hypothetical protein, conserved	0	0.391715	0.009375	0.815961
Tb927.7.5280	hypothetical protein, conserved	0	0.373125	0.00135219	0.811991
Tb11.02.0880	hypothetical protein, conserved	0	0.171247	1.23274e-08	0.807049
Tb927.2.2340	hypothetical protein, conserved	0	0.335487	0.00153975	0.802757
Tb927.8.5760	hypothetical protein, conserved	0	0.444941	0.00886992	0.77749
Tb927.3.1420	hypothetical protein, conserved	0	0.221855	8.93956e-07	0.772561
Tb927.10.14920	hypothetical protein, conserved	0	0.361183	0.00950929	0.741081
Tb927.3.2050	hypothetical protein, conserved	0	0.236736	0.000919253	0.730977
Tb927.8.1360	hypothetical protein, conserved	0	0.319798	0.000259603	0.730488
Tb927.5.1680	hypothetical protein, conserved	0	0.406578	0.00455962	0.712396
Tb11.02.1690	hypothetical protein, conserved	0	0.424534	0.00744044	0.706002
Tb927.10.12820	hypothetical protein, conserved	0	0.26156	1.0394e-05	0.679018
Tb11.01.5120	hypothetical protein, conserved	0	0.27163	3.91721e-05	0.664714
Tb11.01.2310	hypothetical protein, conserved	0	0.191702	5.30292e-07	0.641743
Tb927.3.1900	hypothetical protein, conserved	0	0.120876	9.5426e-11	0.638235
Tb927.7.5210	hypothetical protein, conserved	0	0.219446	8.28686e-07	0.624005
Tb927.8.7990	hypothetical protein, conserved	0	0.227174	0.00143384	0.611721
Tb927.8.5580	hypothetical protein, conserved	0	0.189071	0.00186997	0.603543
Tb927.2.5760	hypothetical protein, conserved	0	0.230351	2.46091e-05	0.57515
Tb927.8.3540	hypothetical protein, conserved	0	0.0772481	8.01592e-14	0.543525
Tb927.5.1770	hypothetical protein, conserved	0	0.112438	6.33258e-12	0.530485
Tb11.01.0220	hypothetical protein, conserved	0	0.339575	0.003666	0.516923
Tb927.10.3400	hypothetical protein, conserved	0	0.303352	0.000116237	0.515843
Tb11.03.0240	hypothetical protein, conserved	0	0.451999	0.00801985	0.514825
Tb11.v4.0001	hypothetical protein	0	0.191422	1.69576e-05	0.511102
Tb927.5.310	hypothetical protein	0	0.262962	6.6787e-05	0.507891
Tb927.8.5110	hypothetical protein, conserved	0	0.426272	0.00418518	0.498291
Tb09.160.0650	hypothetical protein, conserved	0	0.175768	6.86448e-06	0.49393
Tb927.8.800	hypothetical protein, conserved	0	0.352323	0.00180032	0.465841
Tb927.7.2640	hypothetical protein, conserved	0	0.260809	0.000465295	0.461097
Tb927.7.2160	hypothetical protein, conserved	0	0.166252	9.23848e-08	0.242492
Tb11.02.4910	acidocalcisomal pyrophosphatase	Acidocalcisome	0.321252	0.00100256	1.21323
Tb11.18.0006	carnitine O-acetyltransferase, putative	Amino acid metabolism	0.397506	0.00951937	1.21129
Tb11.55.0024	hypothetical protein, conserved	Amino acid metabolism	0.325566	0.00202227	0.885091
Tb09.211.3330	cystathione gamma lyase, putative	Amino acid metabolism	0.398215	0.00950929	0.815462
Tb927.5.3800	glutamine hydrolysing (not ammonia-dependent) carbomoyl phosphate synthase, putative	Amino acid metabolism	0.0553467	1.92046e-18	0.398161
Tb927.4.4870	amino acid transporter, putative	Amino acid transporter	0.367697	0.00425942	0.922509
Tb927.10.3560	arginine N-methyltransferase, putative	Arginine methylation	0.368049	0.00282246	0.968901
Tb927.10.2880	calcium channel protein, putative	Calcium	0.10919	5.51177e-12	0.7917
Tb11.01.8460	cyclin 6 ,mitotic cyclin (pers. comm. J. Mottram, Univ. of Glasgow)	Cell cycle	0.148518	1.80261e-08	1.80405
Tb927.7.1190	regulator of chromosome condensation, putative	Cell cycle	0.342932	0.000341125	0.942029
Tb927.7.1590	mitotic cyclin ,cyclin CycB3	Cell cycle	0.33225	0.00358562	0.764184
Tb11.01.3080	heat shock protein 70, putative	Chaperone	0.426529	0.00984305	2.47345
Tb927.10.9840	chaperone protein DNAj, putative	Chaperone	0.107642	9.24031e-09	1.86345
Tb927.7.710	heat shock 70 kDa protein, putative	Chaperone	0.0876708	2.27964e-13	1.70013
Tb927.2.1560	cyclophilin-type peptidyl-prolyl cis-trans isomerase, putative	Chaperone	0.380579	0.00394744	1.21269
Tb927.2.1680	cyclophilin-type peptidyl-prolyl cis-trans isomerase, putative	Chaperone	0.388877	0.00465823	1.19252
Tb11.01.4050	heat shock protein HslVU, ATPase subunit HslU, putative ,ATP-dependent hsl protease ATP-binding subunit hslU, putative	Chaperone	0.378979	0.00668783	1.08625
Tb927.10.12710	heat shock protein, putative	Chaperone	0.224741	0.000859666	0.132392
Tb927.10.10340	structural maintenance of chromosome 2, putative	Chromatin	0.118227	0.000165624	2.1354
Tb09.160.3470	condensin subunit 1, putative	Chromatin	0.189055	4.1041e-07	1.63264
Tb927.5.3510	structural maintenance of chromosome 3 , putative	Chromatin	0.234499	0.000263935	1.41608
Tb927.10.740	structural maintenance of chromosome 4, putative	Chromatin	0.0730254	1.08259e-13	1.41357
Tb09.211.2970	structural maintenance of chromosome 1, putative	Chromatin	0.12426	1.29481e-09	0.812957
Tb09.160.4240	nucleosome assembly protein-like protein	Chromatin	0.162722	0.000329957	0.796908
Tb927.10.3650	NADH-dependent fumarate reductase, putative	Citric acid cycle	0.228519	3.43649e-06	1.45564
Tb11.47.0004	2-oxoglutarate dehydrogenase E1 component, putative	Citric acid cycle	0.246704	3.04005e-06	0.506776
Tb927.7.3830	kinesin K39, putative	Cytoskeleton	0.0581479	0.000362255	6.87919
Tb927.10.890	kinesin, putative	Cytoskeleton	0.0314904	3.50129e-16	5.38602
Tb11.01.6510	paraflagellar rod component, putative	Cytoskeleton	0.157622	0.000481728	4.27825
Tb927.3.2040	kinesin, putative	Cytoskeleton	0.132288	6.47173e-09	4.11247
Tb927.10.2640	intraflagellar transport protein IFT81, putative	Cytoskeleton	0.105184	1.14811e-11	4.09407
Tb927.3.4330	73 kDa paraflagellar rod protein ,PFR1	Cytoskeleton	0.193997	3.01499e-07	3.95394
Tb927.3.4290	PFR1	Cytoskeleton	0.200754	5.21952e-07	3.87226
Tb927.3.4300	73 kDa paraflagellar rod protein ,PFR1	Cytoskeleton	0.201383	5.48718e-07	3.86225
Tb927.3.4310	73 kDa paraflagellar rod protein ,PFR1	Cytoskeleton	0.201383	5.48718e-07	3.86225
Tb927.3.4320	73 kDa paraflagellar rod protein ,PFR1	Cytoskeleton	0.201383	5.48718e-07	3.86225
Tb927.8.4640	flagellar protofilament ribbon protein, putative	Cytoskeleton	0.333996	0.00143492	3.55701
Tb11.01.6740	Tb5.20	Cytoskeleton	0.0389183	5.40781e-12	3.50935
Tb927.10.11080	paraflagellar rod protein ,I17 antigen	Cytoskeleton	0.0256361	0.00785171	3.27832
Tb927.8.4970	PFR2	Cytoskeleton	0.316044	0.000448707	3.27333
Tb927.8.5000	69 kDa paraflagellar rod protein ,PFR2	Cytoskeleton	0.316126	0.000448707	3.23933
Tb927.8.5010	69 kDa paraflagellar rod protein ,PFR2	Cytoskeleton	0.317026	0.000465295	3.22849
Tb927.8.4980	69 kDa paraflagellar rod protein ,PFR2	Cytoskeleton	0.316553	0.000459362	3.22746
Tb927.8.4990	69 kDa paraflagellar rod protein ,PFR2	Cytoskeleton	0.316553	0.000459362	3.22746
Tb09.160.1200	microtubule- associated protein	Cytoskeleton	0.0813691	3.83091e-06	2.57872
Tb11.47.0006	hypothetical protein, conserved	Cytoskeleton	0.245301	9.324e-06	1.92889
Tb927.8.2630	kinesin, putative	Cytoskeleton	0.170583	0.00672205	1.87088
Tb927.1.1350	kinesin heavy chain, putative	Cytoskeleton	0.173486	2.55744e-07	1.84828
Tb927.2.4060	dynein intermediate chain IC 138, putative	Cytoskeleton	0.147454	6.47173e-09	1.81303
Tb927.10.15400	kinesin, putative	Cytoskeleton	0.106087	4.9068e-10	1.79653
Tb927.10.15250	paraflagellar rod component, putative	Cytoskeleton	0.378541	0.00615636	1.79109
Tb927.8.6070	basal body component ,ML protein	Cytoskeleton	0.0889684	5.70713e-12	1.78885
Tb927.8.4950	kinesin, putative	Cytoskeleton	0.0837226	1.83143e-12	1.68886
Tb927.2.4330	PFR5	Cytoskeleton	0.115244	1.02057e-09	1.65343
Tb927.5.2090	kinesin, putative	Cytoskeleton	0.163118	8.59769e-09	1.57249
Tb11.01.2670	MENG ,flagellar component	Cytoskeleton	0.112802	0.000132355	1.55132
Tb927.10.9570	paraflagellar rod component, putative	Cytoskeleton	0.0767242	5.71177e-05	1.52724
Tb927.8.6200	tubulin folding cofactor D, putative	Cytoskeleton	0.271777	4.56042e-05	1.51422
Tb927.6.2250	rac serine-threonine kinase, putative ,protein kinase, putative	Cytoskeleton	0.258572	0.000182234	1.50748
Tb11.01.2530	kinesin-like protein, putative	Cytoskeleton	0.198756	3.21654e-06	1.47219
Tb927.7.3000	kinesin, putative	Cytoskeleton	0.276122	0.00768863	1.44943
Tb927.6.2880	kinesin, putative	Cytoskeleton	0.223262	1.70976e-05	1.43979
Tb927.6.3670	paraflagellar rod component, putative	Cytoskeleton	0.157591	7.29843e-09	1.43688
Tb11.02.0090	kinesin, putative ,Unc104-like kinesin, putative	Cytoskeleton	0.142465	1.86287e-09	1.39037
Tb11.02.0860	hypothetical protein, conserved	Cytoskeleton	0.219882	2.70902e-06	1.38799
Tb11.03.0880	hypothetical protein, conserved ,predicted WD40 repeat protein	Cytoskeleton	0.266505	3.82033e-05	1.38433
Tb927.2.950	paraflagellar rod component, putative	Cytoskeleton	0.163379	0.00546167	1.35373
Tb11.01.7750	dynein docking complex 2 (ODA1) protein, putative	Cytoskeleton	0.272942	6.22578e-05	1.35187
Tb09.160.5670	hypothetical protein, conserved ,predicted tetratricopeptide repeat protein	Cytoskeleton	0.219736	1.68359e-06	1.32354
Tb927.5.3030	intraflagellar transport protein IFT122, putative	Cytoskeleton	0.150294	2.49908e-09	1.30579
Tb927.2.3660	paraflagellar rod component, putative	Cytoskeleton	0.118293	3.07716e-11	1.29575
Tb927.3.5490	flagellar transport protein, putative	Cytoskeleton	0.231768	1.45654e-05	1.25456
Tb927.4.560	dynein heavy chain, putative	Cytoskeleton	0.064292	4.68776e-17	1.25268
Tb11.01.3990	kinesin, putative	Cytoskeleton	0.39333	0.00594362	1.22562
Tb927.10.14470	intraflagellar transport protein IFT140, putative	Cytoskeleton	0.101077	4.01255e-09	1.17432
Tb927.10.5350	dynein heavy chain, putative	Cytoskeleton	0.057692	1.44757e-17	1.16948
Tb927.8.4870	DIGIT ,flagellar component	Cytoskeleton	0.227655	9.2103e-06	1.16777
Tb11.01.5490	kinesin-II 85 Kd subunit, putative	Cytoskeleton	0.171534	1.42189e-07	1.14979
Tb927.7.920	dynein heavy chain, putative	Cytoskeleton	0.0834415	2.2898e-14	1.13928
Tb927.4.2080	hypothetical protein, conserved	Cytoskeleton	0.177652	5.4501e-08	1.11778
Tb927.4.2140	MBO2 ,flagellar component	Cytoskeleton	0.23382	2.05098e-05	1.07679
Tb927.8.4010	flagellum-adhesion glycoprotein	Cytoskeleton	0.392783	0.00845124	1.07289
Tb927.7.3160	dynein heavy chain, cytosolic, putative	Cytoskeleton	0.141453	3.49689e-10	1.07064
Tb09.244.2600	ankyrin-repeat protein, putative	Cytoskeleton	0.242638	7.75548e-06	1.05237
Tb09.160.2260	kinesin, putative ,MCAK-like kinesin, putative	Cytoskeleton	0.244266	3.47246e-05	1.03909
Tb11.01.0390	dynein heavy chain, putative	Cytoskeleton	0.103212	2.25355e-08	1.03479
Tb927.3.5540	dynein intermediate chain WDRD34, putative	Cytoskeleton	0.387453	0.00743868	1.02781
Tb927.3.930	dynein heavy chain, putative	Cytoskeleton	0.0501063	2.71209e-12	1.00509
Tb11.02.2640	dynein intermediate chain IC78, putative	Cytoskeleton	0.326941	0.00121483	0.99918
Tb11.01.3960	flagellar protein essential for flagellar pocket biogenesis	Cytoskeleton	0.413368	0.00721771	0.994574
Tb927.4.2730	kinesin, putative	Cytoskeleton	0.362573	0.0032506	0.989881
Tb11.01.5910	dynein intermediate chain IC70, putative	Cytoskeleton	0.246888	9.26855e-05	0.986122
Tb927.10.1110	kinesin, putative	Cytoskeleton	0.236321	1.13578e-05	0.971946
Tb927.3.3000	flagellar transport protein, putative	Cytoskeleton	0.328899	0.000749782	0.966303
Tb927.4.870	dynein heavy chain, putative	Cytoskeleton	0.0646082	3.83354e-17	0.939786
Tb11.02.0030	dynein heavy chain, putative	Cytoskeleton	0.0676046	2.06769e-12	0.938113
Tb927.3.5310	paraflagellar rod protein ,I2 antigen	Cytoskeleton	0.0665924	0.00127792	0.925685
Tb927.6.1770	kinesin, putative	Cytoskeleton	0.402497	0.00457276	0.92147
Tb927.10.5380	intraflagellar transport protein IFT122, putative	Cytoskeleton	0.393499	0.00294721	0.907651
Tb11.18.0003	dynein intermediate chain, putative ,dynein intermediate chain IC140 (IDA7), putative	Cytoskeleton	0.292722	0.000168039	0.900184
Tb927.10.14990	intraflagellar transport protein IFT80/CHE2, putative	Cytoskeleton	0.409631	0.00368387	0.888471
Tb927.5.2410	kinesin, putative	Cytoskeleton	0.147216	7.44044e-05	0.886467
Tb927.2.4810	hypothetical protein, conserved	Cytoskeleton	0.156025	8.48562e-09	0.86164
Tb927.5.2950	hypothetical protein, conserved	Cytoskeleton	0.293586	0.000108667	0.802637
Tb11.01.3010	dynein heavy chain, putative	Cytoskeleton	0.0903124	8.39268e-12	0.79253
Tb927.4.3950	cytoskeleton-associated protein CAP5.5, putative ,cysteine peptidase, Clan CA, family C2, putative	Cytoskeleton	0.291057	8.39839e-05	0.686883
Tb927.2.5270	dynein heavy chain, putative	Cytoskeleton	0.134633	0.00799437	0.629324
Tb927.10.1170	intraflagellar transport protein IFT172, putative	Cytoskeleton	0.0769621	4.5051e-12	0.588627
Tb927.4.3740	flagellar attachment zone protein	Cytoskeleton	0.0963818	1.45312e-06	0.486802
Tb927.8.6660	paraflagellar rod component, putative	Cytoskeleton	0.252323	0.000366128	0.408187
Tb927.8.3250	dynein heavy chain, putative	Cytoskeleton	0.112469	0.00232632	0.362097
Tb11.02.0760	dynein heavy chain, putative	Cytoskeleton	0.0454176	1.11863e-07	0.307823
Tb927.10.14890	C-terminal motor kinesin, putative	Cytoskeleton	0.313876	8.74357e-05	0.248711
Tb927.10.10360	microtubule-associated protein, putative	Cytoskeleton	0.142478	0.000334095	0.193048
Tb11.01.7990	myosin, putative ,myosin heavy chain, putative	Cytoskeleton_Actin	0.206487	2.36335e-06	1.23896
Tb927.6.920	helicase, putative	DNA synthesis, modification, repair	0.366474	0.0095223	2.79297
Tb927.4.1270	ruvB-like DNA helicase, putative	DNA synthesis, modification, repair	0.219092	1.16095e-05	2.33243
Tb927.7.610	DNA ligase, putative ,mitochondrial DNA ligase homolog, putative	DNA synthesis, modification, repair	0.271769	7.48075e-05	1.98264
Tb927.2.4550	FtsJ cell division protein, putative	DNA synthesis, modification, repair	0.212602	6.59076e-06	1.912
Tb09.211.1820	DNA polymerase epsilon catalytic subunit, putative	DNA synthesis, modification, repair	0.150842	2.69739e-09	1.72114
Tb927.3.5440	SNF2 DNA repair protein, putative	DNA synthesis, modification, repair	0.14541	8.28686e-07	1.64816
Tb11.01.0060	DNA polymerase kappa, putative ,DNA polymerase IV, putative	DNA synthesis, modification, repair	0.352905	0.00799979	1.58671
Tb11.01.3510	minichromosome maintenance (MCM) complex subunit, putative	DNA synthesis, modification, repair	0.229017	1.98409e-05	1.45981
Tb11.01.0340	RAD50 DNA repair-like protein	DNA synthesis, modification, repair	0.0518469	2.25358e-12	1.43694
Tb11.02.3270	minichromosome maintenance (MCM) complex subunit, putative ,DNA replication licensing factor, putative	DNA synthesis, modification, repair	0.358537	0.00422991	1.3728
Tb927.6.5110	damage-specific DNA binding protein, putative	DNA synthesis, modification, repair	0.297095	0.00058996	1.33345
Tb927.8.4880	DNA polymerase alpha catalytic subunit ,DNA polymerase I	DNA synthesis, modification, repair	0.145328	8.48562e-09	1.30985
Tb927.6.1760	KU80 protein	DNA synthesis, modification, repair	0.314222	0.000615527	1.28569
Tb927.7.830	telomerase-associated protein, putative	DNA synthesis, modification, repair	0.190958	2.59577e-07	1.28386
Tb11.02.3250	DNA polymerase theta, putative	DNA synthesis, modification, repair	0.208599	8.36247e-06	1.24767
Tb11.02.3110	DNA repair and recombination protein RAD54, putative	DNA synthesis, modification, repair	0.24208	3.06948e-05	1.20526
Tb927.7.4080	DNA excision repair protein, putative ,SNF2 family helicase-like protein, putative	DNA synthesis, modification, repair	0.30818	0.00053479	1.12219
Tb927.10.6410	mismatch repair protein MSH8, putative ,mismatch repair protein	DNA synthesis, modification, repair	0.423986	0.0058882	1.05195
Tb11.02.3400	SNF2 DNA repair protein, putative ,SNF2 family protein	DNA synthesis, modification, repair	0.352387	0.00364621	1.02957
Tb927.4.1330	DNA topoisomerase IB, large subunit	DNA synthesis, modification, repair	0.312008	0.00127631	1.01776
Tb11.01.1100	helicase-like protein	DNA synthesis, modification, repair	0.211152	6.3634e-06	0.966407
Tb11.01.3390	DNA topoisomerase II, putative	DNA synthesis, modification, repair	0.236685	1.96717e-05	0.909449
Tb927.5.2650	L-galactonolactone oxidase	Enzyme	0.161112	8.64925e-06	1.83227
Tb11.02.5650	oxidoreductase-like protein	Enzyme	0.182094	2.26145e-06	1.59674
Tb927.7.580	GTP-binding protein, putative	Enzyme	0.124963	3.71858e-05	1.54914
Tb927.10.5670	N-acetyltransferase subunit Nat1, putative	Enzyme	0.0726129	3.07716e-11	1.41076
Tb927.7.7450	GTP-binding protein, putative	Enzyme	0.316332	0.000971655	1.30508
Tb11.01.4960	regulator of nonsense transcripts 1, putative ,nonsense mRNA reducing factor 1, putative	Enzyme	0.267093	1.07569e-05	1.29705
Tb927.7.2080	methyltransferase, putative ,mRNA cap methyltransferase-like protein	Enzyme	0.367761	0.00368401	1.16407
Tb927.8.6420	short-chain dehydrogenase, putative	Enzyme	0.360064	0.00750022	1.06346
Tb927.5.3050	poly(ADP-ribose) polymerase, putative	Enzyme	0.328957	0.00233721	1.01001
Tb11.01.4940	AAA ATPase, putative	Enzyme	0.223101	5.7471e-07	0.979554
Tb927.10.11590	nicotinate phosphoribosyltransferase, putative	Enzyme	0.286525	0.000477533	0.922195
Tb11.02.3040	aldo/keto reductase, putative	Enzyme	0.354801	0.00609801	0.880259
Tb09.211.4240	phosphoinositide-binding protein, putative	Enzyme	0.294983	9.85647e-05	0.767077
Tb11.01.6240	expression site-associated gene (ESAG) protein, putative ,expression site-associated gene 2 (ESAG2) protein, putative	ESAG	0.19768	2.90514e-06	4.04234
Tb927.5.120	expression site-associated gene (ESAG) protein, putative ,expression site-associated gene 9 (ESAG9) protein, putative	ESAG	0.135605	0.00403265	1.97086
Tb927.1.5100	expression site-associated gene 2 (ESAG2) protein, putative	ESAG	0.336437	0.00539103	1.88806
Tb11.03.0990	expression site-associated gene 4 (ESAG4) protein, putative ,receptor-type adenylate cyclase	ESAG	0.234969	0.000512196	1.60493
Tb927.10.9500	expression site-associated gene (ESAG) protein, putative ,expression site-associated gene 3 (ESAG3) protein, putative	ESAG	0.363902	0.00513074	1.5251
Tb11.01.8820	expression site-associated gene (ESAG) protein, putative ,expression site-associated gene 4 (ESAG4) protein, putative ,receptor-type adenylate cyclase, putative	ESAG	0.387251	0.00392646	1.12517
Tb927.10.16190	expression site-associated gene 4 (ESAG4) protein, putative ,expression site-associated gene (ESAG) protein, putative ,receptor-type adenylate cyclase	ESAG	0.409966	0.00799362	0.924632
Tb927.7.170	expression site-associated gene (ESAG) protein, putative ,expression site-associated gene 9 (ESAG9) protein, putative	ESAG	0.206982	2.37204e-05	0.760462
Tb927.3.5790	expression site-associated gene (ESAG, pseudogene), putative ,expression site-associated gene 9 (ESAG9), point mutation	ESAG pseudogene	0.188857	0.00012348	1.32611
Tb927.8.2610	5-methyltetrahydropteroyltriglutamate-homocysteine S-methyltransferase, putative	Folate	0.336531	0.000961333	1.32321
Tb11.22.0003	phosphoglycerate kinase, putative	Glucose & glycerol	0.386622	0.00854074	1.59408
Tb927.8.1020	6-phosphofructo-2-kinase/fructose-2,6-biphosphatase, putative	Glucose & glycerol	0.32214	0.00103308	1.23145
Tb11.01.6410	phosphomannose isomerase, putative	Glucose & glycerol	0.332836	0.00206576	0.985676
Tb927.8.5600	transaldolase, putative	Glucose & glycerol	0.298226	0.000991625	0.748928
Tb11.01.2140	glycosyl hydrolase-like protein	Glycan synthesis & metabolism	0.343343	0.000771395	1.18037
Tb927.10.2570	lysosomal alpha-mannosidase precursor, putative	Glycan synthesis & metabolism	0.254314	0.000313353	1.03043
Tb927.3.4630	UDP-glucose:glycoprotein glucosyltransferase, putative	Glycan synthesis & metabolism	0.281452	1.47851e-05	0.444166
Tb927.7.7520	receptor-type adenylate cyclase GRESAG 4, putative	GRESAG	0.129227	5.20415e-10	2.45199
Tb927.4.4440	adenylyl cyclase	GRESAG	0.067109	3.50129e-16	2.41862
Tb927.8.7930	receptor-type adenylate cyclase GRESAG 4, putative	GRESAG	0.356633	0.00202607	2.36697
Tb927.7.7530	receptor-type adenylate cyclase GRESAG 4, putative	GRESAG	0.128826	4.451e-10	2.3622
Tb927.4.4470	adenylyl cyclase	GRESAG	0.0857394	8.03359e-14	2.32291
Tb927.4.4460	adenylyl cyclase	GRESAG	0.0674323	4.26749e-16	2.24485
Tb927.8.7900	receptor-type adenylate cyclase GRESAG 4, putative	GRESAG	0.373467	0.00340317	2.14442
Tb927.8.7890	receptor-type adenylate cyclase GRESAG 4, putative	GRESAG	0.327684	0.000729725	2.12349
Tb927.8.7870	receptor-type adenylate cyclase GRESAG 4, putative	GRESAG	0.321675	0.00067301	2.12024
Tb927.4.4410	adenylyl cyclase	GRESAG	0.0703259	9.70705e-16	2.07726
Tb927.4.4450	adenylyl cyclase	GRESAG	0.0736797	1.70154e-15	2.06275
Tb927.4.4420	adenylyl cyclase, pseudogene, putative ,adenylyl cyclase, frameshift	GRESAG	0.0669803	3.50207e-16	2.03274
Tb927.4.4430	adenylyl cyclase	GRESAG	0.0788957	9.16025e-15	1.98175
Tb927.6.200	receptor-type adenylate cyclase GRESAG 4, putative	GRESAG	0.29663	0.000462821	1.92964
Tb927.6.290	receptor-type adenylate cyclase GRESAG 4, pseudogene, putative ,receptor-type adenylate cyclase GRESAG 4, degenerate	GRESAG	0.237232	3.60652e-05	1.81829
Tb927.6.300	receptor-type adenylate cyclase GRESAG 4, putative	GRESAG	0.314241	0.00140299	1.62862
Tb927.8.7940	receptor-type adenylate cyclase GRESAG 4, putative	GRESAG	0.382851	0.00338967	1.62835
Tb927.6.270	receptor-type adenylate cyclase GRESAG 4, pseudogene, putative ,receptor-type adenylate cyclase GRESAG 4, degenerate	GRESAG	0.231117	2.25905e-05	1.62794
Tb927.6.320	receptor-type adenylate cyclase GRESAG 4, pseudogene, putative ,receptor-type adenylate cyclase GRESAG 4, degenerate	GRESAG	0.231641	0.000224356	1.58859
Tb927.6.340	receptor-type adenylate cyclase GRESAG 4, pseudogene, putative ,receptor-type adenylate cyclase GRESAG 4, degenerate	GRESAG	0.22469	8.31651e-05	1.56581
Tb927.6.180	receptor-type adenylate cyclase GRESAG 4, putative	GRESAG	0.346223	0.00499996	1.54591
Tb927.7.6080	receptor-type adenylate cyclase GRESAG 4, putative	GRESAG	0.357323	0.00114922	1.48969
Tb927.8.7910	receptor-type adenylate cyclase GRESAG 4 (pseudogene), putative ,receptor-type adenylate cyclase GRESAG 4, frameshift	GRESAG	0.323559	0.000662757	1.45132
Tb927.10.2430	receptor-type adenylate cyclase GRESAG 4, putative	GRESAG	0.397496	0.00796108	1.32301
Tb927.6.390	adenylyl cyclase, pseudogene, putative ,adenylyl cyclase, degenerate	GRESAG	0.228699	8.36422e-05	1.29797
Tb927.7.7470	receptor-type adenylate cyclase GRESAG 4, putative	GRESAG	0.390906	0.00486293	1.29686
Tb927.8.7920	receptor-type adenylate cyclase GRESAG 4, putative	GRESAG	0.29547	0.000207485	1.26176
Tb927.7.6050	receptor-type adenylate cyclase GRESAG 4, putative	GRESAG	0.323798	0.000287801	1.13677
Tb927.7.6070	receptor-type adenylate cyclase GRESAG 4, putative	GRESAG	0.319138	0.000259603	1.1319
Tb927.7.6040	receptor-type adenylate cyclase GRESAG 4, putative	GRESAG	0.328051	0.000341125	1.10888
Tb927.7.6060	receptor-type adenylate cyclase GRESAG 4, putative	GRESAG	0.313001	0.000177806	1.0914
Tb11.01.5310	receptor-type adenylate cyclase GRESAG 4, putative	GRESAG	0.381067	0.00630405	1.07283
Tb11.27.0001	receptor-type adenylate cyclase GRESAG 4, putative	GRESAG	0.389345	0.0058882	0.981776
Tb927.10.13040	receptor-type adenylate cyclase GRESAG 4, putative ,ESAG 4 (expression site-associated gene 4) protein, putative	GRESAG	0.301026	0.00100575	0.596005
Tb927.10.12510	P-type H%2B-ATPase, putative	Ion channel or pump	0.40761	0.0039475	1.04009
Tb927.10.12500	P-type H%2B-ATPase, putative	Ion channel or pump	0.37483	0.00176764	0.97171
Tb927.8.650	cation-transporting ATPase, putative	Ion channel or pump	0.226953	2.44601e-06	0.879398
Tb09.244.2570	calcium motive p-type ATPase, putative	Ion channel or pump	0.45775	0.00797675	0.559177
Tb927.7.2250	carnitine O-palmitoyltransferase II, putative	Lipids & fatty acids	0.309066	0.000723617	1.43216
Tb09.160.2840	fatty acyl CoA synthetase 4	Lipids & fatty acids	0.399828	0.0044903	0.747888
Tb09.160.2810	fatty acyl CoA synthetase 3	Lipids & fatty acids	0.40083	0.00269681	0.683591
Tb927.8.7100	acetyl-CoA carboxylase, putative	Lipids & fatty acids	0.335836	0.000662765	0.12301
Tb11.53.0001	hypothetical protein ,leucine-rich repeat protein (LRRP), putative	LRRP	0.0843917	0.00198925	11.5083
Tb927.6.130	leucine-rich repeat protein (LRRP, pseudogene), putative ,leucine-rich repeat protein 1 (LRRP1), frameshift	LRRP	0.135469	0.00126484	2.75081
Tb09.v4.0042	#N/A	LRRP	0.154136	0.00546498	2.56374
Tb927.3.1490	leucine-rich repeat protein (LRRP), putative	LRRP	0.306179	0.00431071	2.38732
Tb927.2.1310	leucine-rich repeat protein (LRRP, pseudogene), putative ,leucine-rich repeat protein (LRRP), frameshift	LRRP	0.138702	0.0037633	2.1382
Tb927.2.170	leucine-rich repeat protein (LRRP), putative ,leucine-rich repeat protein 1 (LRRP1), putative	LRRP	0.156905	0.0068151	1.77224
Tb927.3.2790	hypothetical protein, conserved ,leucine-rich repeat protein (LRRP), putative	LRRP	0.281269	6.97167e-05	1.75748
Tb927.4.160	leucine-rich repeat protein (LRRP, pseudogene), putative ,leucine-rich repeat protein 1 (LRRP1), frameshift	LRRP	0.15139	0.00129109	1.73202
Tb927.1.290	leucine-rich repeat protein (LRRP), putative	LRRP	0.154034	0.000812	1.67782
Tb11.01.4390	leucine-rich repeat protein (LRRP), putative	LRRP	0.14199	5.25165e-09	1.52238
Tb927.10.14410	hypothetical protein, conserved ,leucine-rich repeat protein (LRRP), putative	LRRP	0.285501	0.000108668	1.28165
Tb11.02.2850	hypothetical protein, conserved ,leucine-rich repeat protein (LRRP), putative	LRRP	0.134254	6.53351e-10	1.15674
Tb927.7.5600	hypothetical protein, conserved ,leucine-rich repeat protein (LRRP), putative	LRRP	0.226772	1.52e-05	1.15091
Tb11.03.0280	hypothetical protein, conserved ,leucine-rich repeat protein (LRRP), putative	LRRP	0.298095	0.000212952	1.01669
Tb927.6.5030	hypothetical protein, conserved ,leucine-rich repeat protein (LRRP), putative	LRRP	0.327404	0.00284821	1.01306
Tb927.5.1300	vacuolar proton translocating ATPase subunit A, putative	Lysosome	0.295429	0.000453427	1.60508
Tb11.02.5130	neurobeachin/beige protein, putative	Lysosome	0.22297	3.04005e-06	1.40827
Tb927.10.2270	vacuolar protein sorting-associated protein 35, putative	Lysosome	0.282619	9.56662e-05	1.38931
Tb927.6.2770	vacuolar assembly protein vps41, putative	Lysosome	0.310294	0.000698141	1.3463
Tb927.8.1200	vacuolar-type Ca2%2B-ATPase 2	Lysosome	0.261448	1.54387e-05	1.23859
Tb927.8.1180	vacuolar-type Ca2%2B-ATPase 1	Lysosome	0.267618	2.44478e-05	1.2301
Tb927.8.1160	vacuolar-type Ca2%2B-ATPase, putative	Lysosome	0.230255	2.39124e-06	1.14903
Tb11.01.2510	vacuolar sorting-associated protein-like, putative	Lysosome	0.262231	0.000511217	1.01568
Tb927.5.1830	lysosomal/endosomal membrane protein p67 ,lysosomal membrane glycoprotein	Lysosome	0.41316	0.0083849	0.62774
Tb927.5.370	75 kDa invariant surface glycoprotein, putative	Membrane	0.237302	2.5215e-05	4.20479
Tb927.5.390	75 kDa invariant surface glycoprotein, putative	Membrane	0.239266	1.87619e-05	4.11351
Tb927.5.360	75 kDa invariant surface glycoprotein	Membrane	0.210238	1.46226e-06	3.85379
Tb927.5.400	75 kDa invariant surface glycoprotein, putative	Membrane	0.260941	7.40788e-05	2.9855
Tb11.01.7130	Tb-291 membrane associated protein, putative ,membrane associated protein, putative	Membrane	0.0426705	2.02644e-18	2.72153
Tb927.5.350	75 kDa invariant surface glycoprotein, putative	Membrane	0.255464	4.71414e-05	2.58912
Tb927.8.1610	MSP-B, putative	Membrane	0.354468	0.00289619	1.64105
Tb927.10.7180	cysteine-rich, acidic integral membrane protein precursor	Membrane	0.0196995	0.00232278	1.58143
Tb09.v2.0010	invariant surface glycoprotein 100 (pseudogene), putative ,invariant surface glycoprotein 100, point mutation	Membrane	0.0358516	5.3625e-22	1.34622
Tb927.8.1640	MSP-B, putative	Membrane	0.27956	0.000152527	0.927427
Tb927.8.1620	MSP-B, putative	Membrane	0.283382	0.00015979	0.920442
Tb927.8.1630	MSP-B, putative	Membrane	0.283382	0.00015979	0.920442
Tb927.5.1390	64 kDa invariant surface glycoprotein	Membrane	0.323712	0.00103071	0.859378
Tb927.5.1410	64 kDa invariant surface glycoprotein	Membrane	0.303405	0.000377498	0.763243
Tb927.10.2410	MSP-C, putative	Membrane	0.172344	1.33e-07	0.755528
Tb927.3.5530	Tb-292 membrane associated protein	Membrane	0.161256	2.46128e-08	0.601266
Tb927.6.3750	heat shock 70 kDa protein, mitochondrial precursor, putative	Mitochondrial biogenesis	0.181109	3.55702e-08	1.07861
Tb927.6.3740	heat shock 70 kDa protein, mitochondrial precursor, putative	Mitochondrial biogenesis	0.154313	1.02057e-09	1.0401
Tb927.6.3800	heat shock 70 kDa protein, mitochondrial precursor, putative	Mitochondrial biogenesis	0.154837	1.14169e-09	0.948186
Tb927.5.1060	mitochondrial processing peptidase, beta subunit, putative ,metallo-peptidase, Clan ME, Family M16	Mitochondrial biogenesis	0.334739	0.00410139	0.478956
Tb927.7.3990	mitochondrial DNA polymerase I protein C	Mitochondrial DNA	0.121332	0.000215954	2.36586
Tb927.10.1900	DNA topoisomerase IA, putative	Mitochondrial DNA	0.264917	7.7996e-05	2.1895
Tb11.02.0770	mitochondrial DNA polymerase I protein D, putative	Mitochondrial DNA	0.170119	3.89028e-08	1.12873
Tb09.160.4090	DNA topoisomerase ii	Mitochondrial DNA	0.155462	1.1861e-08	1.08367
Tb11.02.2300	mitochondrial DNA polymerase I protein B	Mitochondrial DNA	0.389847	0.00666621	1.05116
Tb927.8.3560	DNA repair and recombination helicase	Mitochondrial DNA	0.309179	0.000716302	0.981965
Tb11.02.4730	DNA repair and recombination helicase protein PIF1, putative ,DNA repair and recombination protein, mitochondrial precursor, putative	Mitochondrial DNA	0.353197	0.00321393	0.763955
Tb927.5.2780	mitochondrial DNA polymerase beta	Mitochondrial DNA	0.43301	0.00781618	0.654748
Tb927.10.520	hypothetical protein, conserved	Mitochondrial pathway	0.318333	0.00153524	1.76577
Tb927.6.1410	hypothetical protein, conserved	Mitochondrial pathway	0.358702	0.00845124	1.15573
Tb927.10.7610	hypothetical protein, conserved	Mitochondrial pathway	0.23885	2.50369e-06	1.14381
Tb927.4.1500	RNA editing associated helicase 2	Mitochondrial RNA	0.189034	0.000328905	2.36681
Tb11.02.3530	mitochondrial DNA-directed RNA polymerase	Mitochondrial RNA	0.358806	0.00306248	1.35892
Tb927.10.9720	RNA-editing-associated protein 1 ,RNA-binding protein ,oligo (U) binding protein ,RNA editing complex protein	Mitochondrial RNA	0.158006	9.03834e-08	1.2089
Tb927.7.2570	hypothetical protein, conserved	Mitochondrial RNA	0.378774	0.00375752	1.19513
Tb927.2.3180	hypothetical protein, conserved	Mitochondrial RNA	0.391448	0.00709025	1.06591
Tb927.5.4040	hypothetical protein, conserved	Mitochondrial translation	0.267555	7.84492e-05	1.68826
Tb11.02.3670	hypothetical protein, conserved	Mitochondrial translation	0.255524	0.000455701	1.55155
Tb927.2.4400	hypothetical protein, conserved	Mitochondrial translation	0.306012	0.000503295	1.09753
Tb11.02.2710	hypothetical protein, conserved	Mitochondrial translation	0.244242	1.01235e-05	1.09309
Tb927.8.5200	hypothetical protein, conserved	Mitochondrial translation	0.199116	0.00384849	1.06577
Tb927.10.5010	Mitochondrial elongation factor G, putative	Mitochondrial translation	0.224051	6.32723e-05	1.04385
Tb11.01.2880	Nucleoporin	Nucleo-cytoplasmic transport	0.328649	0.00129042	6.58188
Tb09.160.0340	Nucleoporin	Nucleo-cytoplasmic transport	0.147717	6.47173e-09	2.56673
Tb927.2.4230	NUP-1 protein, putative	Nucleo-cytoplasmic transport	0.0148856	1.23291e-26	1.967
Tb927.7.2300	Nucleoporin	Nucleo-cytoplasmic transport	0.277354	3.29787e-05	1.46857
Tb11.01.5940	exportin 1	Nucleo-cytoplasmic transport	0.292774	0.00104078	1.3493
Tb11.22.0004	hypothetical protein, conserved	Nucleo-cytoplasmic transport	0.356704	0.00294236	1.27745
Tb11.03.0810	Nucleoporin	Nucleo-cytoplasmic transport	0.201111	1.4768e-06	1.22435
Tb927.10.2900	importin beta-1 subunit, putative	Nucleo-cytoplasmic transport	0.137665	4.9068e-10	1.00299
Tb11.01.2885	Nucleoporin	Nucleo-cytoplasmic transport	0.335124	0.00160986	0.743972
Tb11.01.7010	hypothetical protein, conserved	Nucleo-cytoplasmic trasnport	0.262132	2.94107e-05	1.18676
Tb927.3.1120	GTP-binding nuclear protein rtb2, putative	Nucleo-cytoplasmic trasnport	0.217712	6.1626e-06	1
Tb11.02.5720	ribonucleoside-diphosphate reductase large chain	Nucleotides	0.364659	0.000908955	0.648403
Tb927.6.2360	adenosine kinase, putative	Nucleotides-Purines	0.361112	0.00715428	1.285
Tb927.10.1400	hypoxanthine-guanine phosphoribosyltransferase	Nucleotides-Purines	0.337777	0.00196919	1.00344
Tb11.01.7390	AMP deaminase, putative	Nucleotides-Purines	0.377451	0.00447097	1.0002
Tb927.10.1390	hypoxanthine-guanine phosphoribosyltransferase, putative	Nucleotides-Purines	0.238815	0.00410575	0.922136
Tb927.10.880	thymidine kinase, putative	Nucleotides-Pyrimidines	0.0634064	3.48454e-06	6.54262
Tb927.5.3820	aspartate carbamoyltransferase, putative	Nucleotides-Pyrimidines	0.301411	0.00108631	1.23119
Tb927.5.3810	orotidine-5-phosphate decarboxylase/orotate phosphoribosyltransferase, putative ,OMPDCase-OPRTase, putative	Nucleotides-Pyrimidines	0.34244	0.00247701	1.02992
Tb927.10.1620	phosphoserine/threonine/tyrosine-binding protein, putative	Pentose phosphate pathway	0.362552	0.00264228	1.24555
Tb11.02.4930	acidocalcisomal pyrophosphatase	Phosphatase	0.336652	0.0015037	1.23037
Tb11.47.0036	calpain, putative ,cysteine peptidase, Clan CA, family C2, putative	Protease or peptidase	0.0229433	1.13225e-27	3.50991
Tb11.57.0008	calpain-like protein, putative ,cytoskeleton assocociated protein, putative	Protease or peptidase	0.0158907	3.0055e-31	3.3164
Tb927.4.3940	calpain-like cysteine peptidase, putative ,cysteine peptidase, Clan CA, family C2, putative	Protease or peptidase	0.345413	0.00567693	1.78367
Tb927.1.2100	calpain-like cysteine peptidase, putative ,cysteine peptidase, Clan CA, family C2, putative	Protease or peptidase	0.207259	2.52598e-07	1.7347
Tb927.6.3310	calpain-like cysteine peptidase, putative ,cysteine peptidase, Clan CA, family C2, putative	Protease or peptidase	0.304382	0.000552039	1.37693
Tb927.10.1420	methionine aminopeptidase 2, putative ,metallo- peptidase, Clan MG, Family M24	Protease or peptidase	0.189249	5.58411e-07	1.1688
Tb927.3.4230	subtilisin-like serine peptidase ,serine peptidase, clan SB, family S8-like protein	Protease or peptidase	0.155869	1.09743e-09	1.11807
Tb11.47.0035	calpain-like cysteine peptidase, putative ,antigen, putative ,cysteine peptidase, Clan CA, family C2, putative	Protease or peptidase	0.0752187	9.14099e-06	1.11459
Tb927.4.4210	ATP-dependent zinc metallopeptidase, putative ,metallo-peptidase, Clan MA(E) Family M41	Protease or peptidase	0.355213	0.00282909	1.09885
Tb927.7.4940	oligopeptidase B protein, putative ,serine peptidase, clan SC, family S9A-like protein	Protease or peptidase	0.374974	0.00384849	1.08999
Tb927.10.9820	mitochondrial intermediate peptidase, putative ,metallo-peptidase, Clan MA(E) Family M3	Protease or peptidase	0.3688	0.00743868	1.07964
Tb927.10.1890	calpain, putative ,cysteine peptidase, Clan CA, family C2, putative	Protease or peptidase	0.395363	0.00993399	0.786561
Tb11.02.0070	aminopeptidase, putative ,metallo-peptidase, Clan MF, Family M17	Protease or peptidase	0.184053	1.82243e-06	0.775819
Tb927.8.8330	calpain, putative ,cysteine peptidase, putative	Protease or peptidase	0.356332	0.000525646	0.602224
Tb927.10.14790	aminopeptidase, putative ,metallo-peptidase, Clan MG, Family M24	Protease or peptidase	0.18924	6.26882e-05	0.598429
Tb927.8.6930	serine/threonine-protein kinase NrkA	Protein kinase	0.331183	0.00220878	2.01189
Tb927.10.15300	protein kinase, putative	Protein kinase	0.154071	1.77675e-08	1.68254
Tb09.211.3410	protein kinase, putative	Protein kinase	0.212167	3.40517e-06	1.64655
Tb11.02.2050	protein kinase, putative ,serine/threonine protein kinase, putative	Protein kinase	0.278798	0.000860807	1.61929
Tb11.02.3010	protein kinase, putative	Protein kinase	0.273	0.000679675	1.44331
Tb927.5.3160	protein kinase, putative	Protein kinase	0.254908	9.2103e-06	1.41382
Tb927.10.5940	protein kinase, putative ,(OTHER) NEK family, HsNEK1-like	Protein kinase	0.359089	0.0085489	1.4101
Tb927.5.3150	protein kinase , putative	Protein kinase	0.241677	0.000301718	1.40682
Tb927.1.1530	protein kinase, putative	Protein kinase	0.226069	5.80996e-06	1.40518
Tb927.7.940	protein kinase C substrate protein, heavy chain, putative ,glucosidase II beta subunit, putative	Protein kinase	0.26968	0.00536602	1.38014
Tb927.10.460	NIMA-related protein kinase	Protein kinase	0.340757	0.00371752	1.35621
Tb927.8.1100	protein kinase, putative	Protein kinase	0.452547	0.00786646	1.31556
Tb927.5.2820	protein kinase, putative	Protein kinase	0.261308	6.97167e-05	1.31555
Tb11.02.4830	protein kinase, putative ,serine/threonine protein kinase, putative	Protein kinase	0.280895	0.000615527	1.1949
Tb11.01.0400	protein kinase, putative	Protein kinase	0.268218	2.48489e-05	1.19279
Tb927.10.1910	protein kinase, putative ,serine/threonine protein kinase, putative	Protein kinase	0.303415	0.000260123	1.1918
Tb927.7.6680	protein kinase, putative	Protein kinase	0.357979	0.00519862	1.16591
Tb927.7.960	protein kinase, putative	Protein kinase	0.325173	0.000434201	1.12515
Tb927.10.14420	protein kinase, putative ,serine/threonine- protein kinase nek1, putative	Protein kinase	0.192218	0.00345804	1.12423
Tb927.3.2440	serine/threonine-protein kinase, putative ,protein kinase, putative	Protein kinase	0.307205	0.00745508	1.0598
Tb927.7.4090	serine/threonine-protein kinase, putative	Protein kinase	0.348648	0.00198925	1.0333
Tb09.160.1780	protein kinase, putative	Protein kinase	0.289362	0.000219262	1.03072
Tb927.3.2690	serine/threonine-protein kinase, putative ,protein kinase, putative	Protein kinase	0.345345	0.000816897	1.02176
Tb11.02.5050	protein kinase, putative	Protein kinase	0.293763	0.000346179	0.977611
Tb927.6.3430	protein kinase, putative	Protein kinase	0.374563	0.00990084	0.923391
Tb927.3.4670	cdc2-related kinase, putative ,cell division control protein, putative	Protein kinase	0.165836	8.31009e-07	0.747467
Tb927.5.590	protein phosphatase 1, regulatory subunit, putative	Protein phosphatase	0.277525	0.000676026	1.2078
Tb927.8.1130	protein phosphatase with EF-Hand domains, putative	Protein phosphatase	0.431652	0.00982249	1.1272
Tb11.02.2650	TFIIF-stimulated CTD phosphatase, putative	Protein phosphatase	0.304651	0.0020301	1.03108
Tb11.03.0390	protein phosphatase 2C, putative	Protein phosphatase	0.245942	0.000678295	0.384528
Tb11.52.0006	hypothetical protein, conserved (pseudogene)	pseudogene	0.0530798	2.01643e-17	5.63821
Tb927.3.1040	hypothetical protein, conserved (pseudogene) ,hypothetical protein, conserved, interrupted	pseudogene	0.294703	0.00134182	1.86786
Tb07.30D13.180	hypothetical protein, conserved (pseudogene)	pseudogene	0.267013	0.000301068	1.80602
Tb07.30D13.80	hypothetical protein, conserved (pseudogene)	pseudogene	0.30002	0.000375947	1.724
Tb07.30D13.130	hypothetical protein, conserved (pseudogene)	pseudogene	0.309069	0.00482678	1.67942
Tb11.01.0980	hypothetical protein, conserved (pseudogene)	pseudogene	0.168385	4.71154e-08	1.31857
Tb927.6.140	retrotransposon hot spot (RHS) protein, putative ,retrotransposon hot spot protein 5 (RHS5), putative	RHS	0.278998	0.000177806	1.54443
Tb927.2.1170	retrotransposon hot spot (RHS) protein, putative ,retrotransposon hot spot protein 5 (RHS5), putative	RHS	0.325577	0.0010795	1.44516
Tb927.2.240	retrotransposon hot spot (RHS) protein, putative ,retrotransposon hot spot protein 5 (RHS5), putative	RHS	0.320143	0.000679574	1.4251
Tb927.1.420	retrotransposon hot spot (RHS) protein, putative ,retrotransposon hot spot protein 5 (RHS5), putative	RHS	0.332413	0.00103536	1.34762
Tb927.2.1080	retrotransposon hot spot (RHS) protein, putative ,retrotransposon hot spot protein 5 (RHS5), putative	RHS	0.365884	0.00374999	1.158
Tb927.1.220	retrotransposon hot spot protein 1 (RHS1), putative	RHS	0.388972	0.00332475	0.991083
Tb927.1.180	retrotransposon hot spot protein 1 (RHS1), putative	RHS	0.386619	0.00516683	0.989368
Tb927.2.370	retrotransposon hot spot (RHS) protein, putative ,retrotransposon hot spot protein 1 (RHS1), putative	RHS	0.350156	0.00134225	0.972794
Tb927.2.450	retrotransposon hot spot (RHS) protein, putative ,retrotransposon hot spot protein 4 (RHS4), putative	RHS	0.415664	0.00721208	0.946425
Tb927.2.340	retrotransposon hot spot (RHS) protein, putative ,retrotransposon hot spot protein 4 (RHS4), putative	RHS	0.380373	0.00219876	0.932868
Tb927.2.470	retrotransposon hot spot (RHS) protein, putative ,retrotransposon hot spot protein 4 (RHS4), putative	RHS	0.384512	0.00338967	0.928761
Tb927.6.5160	retrotransposon hot spot protein (RHS, pseudogene), putative ,retrotransposon hot spot protein 3 (RHS3), point mutation	RHS	0.344537	0.00401594	0.920849
Tb927.1.120	retrotransposon hot spot (RHS) protein, putative ,retrotransposon hot spot protein 4 (RHS4), putative	RHS	0.363882	0.00160611	0.898567
Tb927.2.100	retrotransposon hot spot (RHS) protein, putative ,retrotransposon hot spot protein 1 (RHS1), putative	RHS	0.390718	0.00342639	0.859928
Tb927.2.820	retrotransposon hot spot protein (RHS, pseudogene), putative ,retrotransposon hot spot protein 1 (RHS1), interrupted	RHS	0.398717	0.00516683	0.8202
Tb927.10.10010	60S acidic ribosomal protein, putative	Ribosome	0.274676	0.000605104	1.28441
Tb927.8.4450	RNA-binding protein, putative	RNA binding	0.20156	7.78795e-06	1.40948
Tb10.v4.0033	#N/A	RNA binding	0.361796	0.00232745	1.0447
Tb927.10.4430	pumillo RNA binding protein PUF1	RNA binding	0.361796	0.00232745	1.0447
Tb927.7.2680	hypothetical protein, conserved ,zinc finger protein family member, putative	RNA binding	0.295765	0.00100575	0.966729
Tb927.8.6440	RNA-binding protein, putative	RNA binding	0.18208	4.1729e-06	0.926724
Tb09.160.3150	RBP32	RNA binding	0.37384	0.00302521	0.727316
Tb09.211.3370	RNA-binding protein, putative	RNA binding	0.397167	0.0066665	0.53728
Tb11.46.0009	hypothetical protein, conserved ,zinc finger protein family member, putative	RNA binding	0.127818	2.71177e-10	0.208127
Tb927.8.710	RNA-binding protein, putative	RNA binding	0.111479	0.000736049	0.198145
Tb927.8.1960	hypothetical protein, conserved	RNA degradation	0.311443	0.000955855	2.01138
Tb927.8.2370	dicer-like protein	RNA degradation	0.119128	1.67206e-10	1.68801
Tb927.6.1670	ubiquitin hydrolase, pseudogene, putative ,cysteine peptidase, Clan CA, family C19, frameshift ,ubiquitin hydrolase, frameshift	RNA degradation	0.302394	0.00368401	1.31788
Tb927.10.7440	MTR4	RNA degradation	0.258192	7.43277e-05	1.18751
Tb927.4.1630	ribosomal RNA processing protein 6	RNA degradation	0.342831	0.0033358	1.1499
Tb927.5.2450	5'-3' exonuclease, pseudogene, putative ,5'-3' exonuclease, frameshift ,exoribonuclease 2, frameshift	RNA degradation	0.262038	6.32723e-05	1.10258
Tb927.10.6220	5'-3' exoribonuclease XRND, putative ,5'-3' exoribonuclease 2, putative	RNA degradation	0.367137	0.00514464	1.08504
Tb927.10.2220	piwi-like protein 1	RNA degradation	0.386334	0.00729384	1.06673
Tb927.7.4900	5'-3' exonuclease XRNA, putative ,exoribonuclease 1, putative	RNA degradation	0.277764	3.24031e-05	0.91397
Tb927.10.8720	hypothetical protein, conserved	RNA degradation	0.398887	0.00601169	0.736221
Tb927.10.3990	DHH1	RNA degradation	0.416329	0.00279013	0.572939
Tb927.10.540	ATP-dependent DEAD/H RNA helicase, putative ,DEAD box RNA helicase, putative	RNA helicase	0.105411	1.19268e-11	1.53346
Tb927.10.6630	ATP-dependent DEAD/H RNA helicase HEL64, putative	RNA helicase	0.131748	3.16547e-09	1.49365
Tb927.1.1620	ATP-dependent DEAD/H RNA helicase, putative	RNA helicase	0.389676	0.00730584	1.14526
Tb09.211.2420	PRP8 protein homologue ,U5 snRNA-associated splicing factor	RNA processing	0.158904	1.68634e-08	2.37766
Tb927.5.3600	ATP-dependent DEAD/H RNA helicase, putative	RNA processing	0.212177	7.36573e-06	1.61757
Tb927.7.6980	hypothetical protein, conserved	RNA processing	0.424573	0.00365929	1.52832
Tb11.01.6190	RNA guanylyltransferase	RNA processing	0.176461	9.08508e-06	1.47825
Tb927.5.2290	ATP-dependent RNA helicase, putative	RNA processing	0.197864	2.68622e-07	1.38272
Tb11.01.3690	splicing factor 3B subunit 1, putative	RNA processing	0.393331	0.00235121	1.29832
Tb11.01.2520	Pre-mRNA-splicing factor CWC22, putative	RNA processing	0.360985	0.00607555	1.19302
Tb927.6.4600	pre-mRNA splicing factor ATP-dependent RNA helicase, putative ,ATP-dependent RNA helicase, putative	RNA processing	0.20224	1.52842e-05	1.16597
Tb11.02.1930	ATP-dependent RNA helicase, putative ,DEAD/DEAH box RNA helicase, putative	RNA processing	0.239277	0.00305898	0.997809
Tb927.6.2780	U3 small nuclear ribonucleoprotein (snRNP), putative	RNA processing	0.218444	0.000122249	0.972787
Tb11.01.6170	cleavage and polyadenylation specificity factor-like protein, putative	RNA processing	0.44412	0.00915935	0.966864
Tb11.03.0450	RNA polymerase I second largest subunit	RNA synthesis I	0.183619	2.59577e-07	2.08479
Tb927.8.5090	DNA-directed RNA polymerase I largest subunit	RNA synthesis II	0.207456	8.28686e-07	1.68947
Tb927.8.7400	RNA polymerase IIA largest subunit	RNA synthesis II	0.197362	0.00255815	1.32438
Tb927.4.5020	RNA polymerase IIA largest subunit	RNA synthesis II	0.197478	0.00409732	1.26212
Tb927.3.3220	hypothetical protein, conserved	RNA synthesis II	0.414874	0.0055665	1.19542
Tb927.4.3810	DNA-directed RNA polymerase II subunit 2, putative ,RNA polymerase subunit, putative	RNA synthesis II	0.336756	0.000812	1.04692
Tb927.10.2780	DNA-directed RNA polymerase iii largest subunit ,RNA polymerase III largest subunit	RNA synthesis III	0.188365	1.3888e-07	1.43414
Tb927.1.540	DNA-directed RNA polymerase III, putative ,RNA polymerase subunit, putative	RNA synthesis III	0.351027	0.00682275	0.917263
Tb927.3.620	ATP-dependent DEAD/H RNA helicase, putative	rRNA-tRNA processing	0.110501	0.000219105	2.32232
Tb927.5.4270	ATP-dependent DEAD/H RNA helicase, putative	rRNA-tRNA processing	0.217589	1.15695e-05	2.21749
Tb927.4.2630	ATP-dependent DEAD/H RNA helicase, putative	rRNA-tRNA processing	0.182767	0.00401594	2.14619
Tb927.8.3750	nucleolar protein, putative	rRNA-tRNA processing	0.202813	1.93112e-06	1.39187
Tb927.5.4420	nucleolar RNA helicase II, putative ,nucleolar RNA helicase Gu, putative	rRNA-tRNA processing	0.330032	0.000507927	1.36306
Tb09.160.1160	nucleolar protein	rRNA-tRNA processing	0.328028	0.000243369	1.26078
Tb11.02.4570	#N/A	rRNA-tRNA processing	0.269788	0.00016157	1.23816
Tb927.10.9780	ATP-dependent DEAD/H RNA helicase, putative ,ATP- dependent RNA helicase, putative	rRNA-tRNA processing	0.374124	0.00484261	1.21487
Tb09.160.1180	nucleolar protein	rRNA-tRNA processing	0.334592	0.000463481	0.979524
Tb927.3.4020	phosphatidylinositol 4-kinase alpha, putative	Signalling	0.356734	0.00176113	2.46204
Tb927.4.420	phosphatidylinositol 3-kinase (tor2)	Signalling	0.105929	8.30443e-12	2.38977
Tb927.8.3200	hypothetical protein, conserved	Signalling	0.208683	1.01827e-06	2.10672
Tb09.160.3590	cAMP-specific phosphodiesterase	Signalling	0.173856	4.75701e-08	2.06947
Tb09.160.3630	cAMP-specific phosphodiesterase	Signalling	0.191349	3.37798e-07	1.73731
Tb11.01.6300	phosphatidylinositol 3-related kinase, putative	Signalling	0.108279	4.68548e-12	1.69506
Tb09.160.2980	GTPase activating protein, putative	Signalling	0.19685	6.51168e-07	1.41897
Tb927.10.8420	phosphatidylinositol 3 kinase, putative	Signalling	0.142247	1.01504e-09	1.22652
Tb927.7.4400	inositol polyphosphate kinase-like protein, putative	Signalling	0.385732	0.00404669	1.18791
Tb11.47.0002	phosphatidylinositol (3,5) kinase, putative	Signalling	0.280978	0.000134264	1.05825
Tb11.01.1290	14-3-3-I protein	Signalling	0.306582	0.000177806	1
Tb927.4.800	hypothetical protein, conserved	Signalling	0.177056	3.98916e-08	0.98816
Tb927.2.2260	phosphatidylinositol kinase domain protein, putative	Signalling	0.139072	0.000697358	0.546307
Tb927.7.5230	lanosterol synthase	Sterols	0.379241	0.00194666	1.08886
Tb927.3.2900	elongation initiation factor 2 alpha subunit, putative	Translation	0.19289	2.96571e-06	5.54363
Tb11.01.5860	T-complex protein 1, epsilon subunit, putative	Translation	0.131045	8.85082e-06	2.7632
Tb11.42.0003	T-complex protein 1, beta subunit, putative	Translation	0.193831	7.41419e-07	2.46578
Tb11.03.0940	elongation factor, putative	Translation	0.257646	6.38314e-05	1.43981
Tb11.01.2330	eukaryotic translation initation factor 4 gamma, putative	Translation	0.152419	1.00269e-09	1.35761
Tb927.2.3620	GTP-binding elongation factor Tu family, putative	Translation	0.299578	0.000996946	1.31302
Tb927.10.13360	elongation factor Tu, putative	Translation	0.327876	0.000698141	1.25797
Tb927.2.3780	translation initiation factor IF-2, putative	Translation	0.138171	0.000751836	1.24069
Tb11.01.1370	eukaryotic translation initiation factor 3 subunit, putative ,TGF-beta receptor interacting protein 1	Translation	0.290542	0.00120014	1.19598
Tb927.10.1060	T-complex protein 1, delta subunit, putative	Translation	0.126823	7.5424e-06	0.990245
Tb927.8.4820	eukaryotic translation initation factor 4 gamma, putative	Translation	0.388856	0.00289876	0.942216
Tb11.22.0012	eukaryotic peptide chain release factor subunit 1, putative	Translation	0.265945	8.56992e-05	0.775921
Tb927.8.3150	T-complex protein 1, gamma subunit, putative	Translation	0.440403	0.00824913	0.770231
Tb927.10.8270	eukaryotic translation initiation factor 3 subunit 8, putative	Translation	0.265594	1.45654e-05	0.763609
Tb927.10.8290	eukaryotic translation initiation factor 3 subunit 8, putative	Translation	0.264777	1.40146e-05	0.761491
Tb09.211.2570	T-complex protein 1, eta subunit, putative ,t- complex protein 1 (eta subunit), putative	Translation	0.262577	1.63222e-05	0.525528
Tb927.10.4560	elongation factor 2	Translation	0.216706	1.70492e-05	0.21392
Tb927.10.4570	elongation factor 2	Translation	0.21957	3.00201e-05	0.202934
Tb11.22.0005	phenylalanyl-tRNA synthetase (beta subunit), putative	Translation tRNA	0.29289	0.000263595	1.74859
Tb11.46.0008	arginyl-tRNA synthetase, putative	Translation tRNA	0.348524	0.00202607	1.30442
Tb927.10.1500	methionyl-tRNA synthetase, putative	Translation tRNA	0.195709	7.28878e-07	1.28791
Tb11.01.5710	phenylalanyl-tRNA synthetase alpha chain, putative	Translation tRNA	0.363924	0.00415889	1.24372
Tb927.6.4480	valyl-tRNA synthetase, putative	Translation tRNA	0.235639	2.00274e-06	0.792878
Tb927.6.4590	glutamyl-tRNA synthetase, putative	Translation tRNA	0.398824	0.00485998	0.673606
Tb927.4.2310	asparaginyl-tRNA synthetase, putative	Translation tRNA	0.420314	0.0043124	0.622852
Tb927.10.9190	isoleucyl-tRNA synthetase, putative	Translation tRNA	0.215923	1.85756e-07	0.538789
Tb927.10.15530	ABC transporter, putative	Transporter	0.169319	2.66975e-07	1.53512
Tb11.02.3950	ABC transporter, putative	Transporter	0.356802	0.00194666	1.26576
Tb927.8.2380	ABC transporter, putative	Transporter	0.384235	0.00282246	1.11523
Tb09.160.4600	ABC transporter, putative	Transporter	0.333574	0.00172592	1.10772
Tb927.8.2160	multidrug resistance protein A ,p-glycoprotein	Transporter	0.264426	0.000426618	0.896982
Tb927.10.10880	ATP-binding cassette protein, putative ,ABC transporter, putative ,ATPase, putative	Transporter	0.307893	0.000376799	0.738181
Tb927.3.3730	ABC transporter, putative	Transporter	0.382858	0.0044903	0.536921
Tb927.4.3790	ubiquitin carboxyl-terminal hydrolase, putative ,cysteine peptidase, Clan CA, family C19, putative	Ubiquitin & proteasome	0.105882	2.73177e-10	7.46611
Tb927.3.5520	26S proteasome regulatory non-ATPase subunit	Ubiquitin & proteasome	0.280045	8.36422e-05	1.9016
Tb927.8.570	proteasome regulatory non-ATP-ase subunit 10	Ubiquitin & proteasome	0.159261	9.74793e-07	1.84829
Tb09.211.4210	ubiquitin-protein ligase, putative	Ubiquitin & proteasome	0.153574	7.4037e-09	1.50799
Tb927.10.9750	ubiquitin-protein ligase, putative	Ubiquitin & proteasome	0.254401	9.79934e-06	1.417
Tb09.211.4910	ubiquitin carboxyl-terminal hydrolase, putative ,cysteine peptidase, Clan CA, family C19, putative	Ubiquitin & proteasome	0.365722	0.00513223	1.29247
Tb927.8.5620	ubiquitin carboxyl-terminal hydrolase, putative	Ubiquitin & proteasome	0.257998	1.51261e-05	1.27602
Tb927.6.2690	ubiquitin carboxyl-terminal hydrolase, putative ,cysteine peptidase, Clan CA, family C19, putative	Ubiquitin & proteasome	0.268008	0.000134886	1.2637
Tb11.18.0013	proteasome regulatory non-ATP-ase subunit 3	Ubiquitin & proteasome	0.262051	0.000195445	1.16814
Tb11.01.4060	ubiquitin carboxyl-terminal hydrolase, putative ,cysteine peptidase, Clan CA, family C19, putative	Ubiquitin & proteasome	0.276669	4.75169e-05	1.08094
Tb11.01.1680	polyubiquitin, putative	Ubiquitin & proteasome	0.0963974	1.78708e-13	1
Tb09.211.3610	ubiquitin-activating enzyme e1, putative	Ubiquitin & proteasome	0.183619	3.15906e-07	1
Tb927.8.2640	ubiquitin-activating enzyme e1, putative	Ubiquitin & proteasome	0.261529	1.03437e-05	0.926152
Tb11.01.0960	proteasome regulatory non-ATP-ase subunit 2	Ubiquitin & proteasome	0.424428	0.00545404	0.915196
Tb11.02.2940	ubiquitin carboxyl-terminal hydrolase, putative ,cysteine peptidase, Clan CA, family C19, putative	Ubiquitin & proteasome	0.257819	5.32833e-05	0.911055
Tb927.1.260	hypothetical protein, unlikely	unlikely	0.208547	9.6438e-05	1.404
Tb09.160.3620	hypothetical protein, unlikely	unlikely	0.309958	0.00300865	1.37238
Tb09.211.1860	hypothetical protein, unlikely	unlikely	0.274625	0.00548175	0.915417
Tb927.3.5330	ADP-ribosylation factor GTPase activating protein, putative ,centaurin beta 5	Vesicular transport	0.274316	0.000679675	1.30822
Tb11.02.3070	signal recognition particle 54 kDa	Vesicular transport	0.291659	0.00124471	1.16745
Tb927.6.3500	endosomal trafficking protein RME-8, putative	Vesicular transport	0.115404	5.25719e-11	1.15735
Tb927.10.9230	adaptin complex 4 subunit, putative ,beta-adaptin 4 protein, putative	Vesicular transport	0.221127	2.97417e-05	1.10688
Tb927.1.2570	coatomer beta subunit	Vesicular transport	0.413363	0.0037862	1.00243
Tb927.4.760	gamma-adaptin 1, putative ,AP-1 adapter complex gamma subunit, putative	Vesicular transport	0.328831	0.000698141	0.967606
Tb927.6.2960	epsilon-adaptin, putative ,AP-1/4 adapter complex gamma/epsilon subunit, putative	Vesicular transport	0.270964	0.000311689	0.952491
Tb927.4.450	coatomer alpha subunit, putative	Vesicular transport	0.351612	0.00212346	0.933804
Tb927.1.1560	vesicular-fusion protein nsf, putative ,N-ethylmaleimide sensitive factor (NsF)	Vesicular transport	0.304266	0.000453427	0.8408
Tb11.01.3740	coatomer gamma subunit, putative ,cytosolic coat protein, putative	Vesicular transport	0.29616	0.00458908	0.675415
Tb09.211.1550	chaperone protein DNAj, putative	Vesicular transport	0.252072	3.60652e-05	0.432123
Tb927.1.5170	variant surface glycoprotein (VSG)-related, putative	VSG	0.278427	0.000890507	1.22597
Tb927.5.2720	zinc-finger protein ZPR1, putative	Zinc finger	0.270464	0.000300152	1.38586

## Sheet: RRP45 up
geneID v5	Description	Class	foldChange (RRP45/WT)	padj	HL change RRP45/WT
Tb927.7.1340	10 kDa heat shock protein, putative	Chaperone	4.45498	4.11152e-06	1.22229
Tb927.7.1320	10 kDa heat shock protein, putative	Chaperone	4.43114	4.74394e-06	1
Tb09.211.2580	30S Ribosomal protein S17, putative	Mitochondrial translation	4.05539	0.000344773	0.682988
Tb927.10.5370	40S ribosomal protein S10, putative	Ribosome	7.19114	1.07005e-09	1
Tb927.10.5360	40S ribosomal protein S10, putative	Ribosome	7.06714	1.57362e-09	1
Tb11.02.1830	40S ribosomal protein S12	Ribosome	2.71536	0.00455988	1
Tb927.10.8430	40S ribosomal protein S12, putative	Ribosome	2.57741	0.00417658	1
Tb927.6.4980	40S ribosomal protein S14	Ribosome	3.30441	0.000443579	1
Tb927.3.4360	40S ribosomal protein S15A, putative	Ribosome	5.8313	2.0773e-07	1.82026
Tb11.02.4000	40S ribosomal protein S15A, putative	Ribosome	2.44561	0.00908163	1
Tb927.7.1050	40S ribosomal protein S16, putative	Ribosome	3.04145	0.000981417	1
Tb927.7.1040	40S ribosomal protein S16, putative	Ribosome	2.92344	0.00163734	1
Tb927.10.14710	40S ribosomal protein S2, putative	Ribosome	5.05319	1.55425e-06	1.20869
Tb927.10.14600	40S ribosomal protein S2, putative	Ribosome	5.13971	1.15193e-06	1.19441
Tb927.10.7340	40S ribosomal protein S24E, putative	Ribosome	4.54179	4.85907e-06	1
Tb927.10.7330	40S ribosomal protein S24E, putative	Ribosome	5.11911	9.34549e-07	0.571844
Tb927.3.1370	40S ribosomal protein S25, putative	Ribosome	3.23423	0.000475376	1
Tb11.01.1475	40S ribosomal protein S27, putative	Ribosome	3.9681	4.2223e-05	1
Tb927.10.11540	40S ribosomal protein S3, putative	Ribosome	2.53242	0.00583971	1
Tb927.6.2110	40S ribosomal protein S30, putative	Ribosome	5.04864	4.2315e-06	1
Tb927.6.2100	40S ribosomal protein S30, putative	Ribosome	4.44069	1.27338e-05	1
Tb11.02.1090	40S ribosomal protein S4, putative	Ribosome	2.60324	0.00596735	1
Tb11.02.1085	40S ribosomal protein S4, putative	Ribosome	2.58127	0.00625023	1
Tb11.02.4170	40S ribosomal protein S5, putative	Ribosome	3.28572	0.000188776	1
Tb927.10.190	40S ribosomal protein S6, putative	Ribosome	4.34385	1.57971e-05	1
Tb09.244.2630	40S ribosomal protein S6, putative	Ribosome	3.44315	0.000286347	1
Tb927.8.6150	40S ribosomal protein S8, putative	Ribosome	4.73513	3.54913e-06	1
Tb927.8.6160	40S ribosomal protein S8, putative	Ribosome	4.58051	5.53603e-06	1
Tb927.10.5610	40S ribosomal protein S9, putative	Ribosome	3.38981	0.000378742	1
Tb927.8.1110	40S ribosomal protein S9, putative	Ribosome	2.52732	0.00700554	1
Tb927.4.1070	50S ribosomal protein L13, putative	Mitochondrial translation	3.78627	0.00144776	0.985816
Tb927.6.5120	60S acidic ribosomal protein P2, putative	Ribosome	7.50232	1.22278e-09	1
Tb927.6.5130	60S acidic ribosomal protein P2, putative	Ribosome	7.32873	4.28071e-09	1
Tb09.160.4200	60S acidic ribosomal protein, putative	Ribosome	3.75257	9.31698e-05	1
Tb927.5.1820	60S acidic ribosomal protein, putative	Ribosome	4.90472	0.00329827	1
Tb11.46.0001	60S acidic ribosomal subunit protein, putative	Ribosome	2.69944	0.00268938	1
Tb11.46.0002	60S acidic ribosomal subunit protein, putative	Ribosome	2.62768	0.00344299	1
Tb09.160.5580	60S ribosomal protein L11, putative	Ribosome	4.62419	5.3932e-06	1.43552
Tb09.160.5590	60S ribosomal protein L11, putative	Ribosome	4.44728	1.02065e-05	1
Tb09.211.4550	60S ribosomal protein L12, putative	Ribosome	2.85024	0.00865033	1.5396
Tb927.8.6030	60S ribosomal protein L12, putative	Ribosome	3.79436	3.48085e-05	1
Tb927.3.3320	60S ribosomal protein L13, putative	Ribosome	2.6551	0.00385148	1
Tb927.3.3310	60S ribosomal protein L13, putative	Ribosome	2.61018	0.00441899	1
Tb927.4.3550	60S ribosomal protein L13a, putative	Ribosome	2.45353	0.00905149	1
Tb927.10.14580	60S ribosomal protein L17, putative	Ribosome	6.29039	4.53316e-08	1
Tb927.10.3840	60S ribosomal protein L18a, putative	Ribosome	2.44726	0.00851458	1
Tb927.7.5000	60S ribosomal protein L19, putative	Ribosome	5.30259	1.18101e-06	1
Tb927.7.5020	60S ribosomal protein L19, putative	Ribosome	5.25	1.33479e-06	1
Tb927.5.1110	60S ribosomal protein L2, putative ,60S ribosomal protein L8, putative	Ribosome	6.72816	2.27679e-08	1
Tb11.01.7960	60S ribosomal protein L2, putative ,60S ribosomal protein L8, putative	Ribosome	6.48488	6.67485e-08	1
Tb09.211.2630	60S ribosomal protein L23, putative	Ribosome	5.7851	9.99752e-08	1
Tb09.211.2640	60S ribosomal protein L23, putative	Ribosome	5.65529	1.45941e-07	1
Tb11.01.7545	60S ribosomal protein L27, putative	Ribosome	2.94461	0.00103461	1
Tb11.01.7535	60S ribosomal protein L27, putative	Ribosome	2.92554	0.00111299	1
Tb09.v1.0640	60S ribosomal protein L27a ,60S ribosomal protein L28 ,60S ribosomal protein L29	Ribosome	4.89434	1.54489e-06	1
Tb09.211.2650	60S ribosomal protein L27a ,60S ribosomal protein L28 ,60S ribosomal protein L29	Ribosome	4.89108	1.55425e-06	1
Tb11.01.1790	60S ribosomal protein L29, putative	Ribosome	3.66722	8.01343e-05	1
Tb927.10.12680	60S ribosomal protein L34, putative	Ribosome	4.99933	1.53457e-06	1.57497
Tb11.01.1480	60S ribosomal protein L34, putative	Ribosome	6.01887	1.17795e-07	1.51899
Tb11.02.0500	60S ribosomal protein L37, putative	Ribosome	5.39537	5.14672e-07	1
Tb09.211.0865	60S ribosomal protein L37, putative	Ribosome	4.81625	0.000171737	1
Tb927.10.220	60S ribosomal protein L37a, putative	Ribosome	4.6113	4.12243e-06	1
Tb09.244.2730	60S ribosomal protein L5, putative	Ribosome	3.13421	0.000761936	2.00623
Tb09.244.2740	60S ribosomal protein L5, putative	Ribosome	3.1042	0.000829283	1.81107
Tb927.10.11390	60S ribosomal protein L6, putative	Ribosome	5.46342	4.17588e-07	1
Tb927.8.1340	60S ribosomal protein L7a, putative	Ribosome	3.36661	0.000432126	1.30485
Tb927.8.1330	60S ribosomal protein L7a, putative	Ribosome	3.39477	0.000394682	1.20095
Tb927.10.6370	60S ribosomal proteins L37, putative	Ribosome	5.18847	5.57112e-07	1
Tb927.10.15800	actin related protein 2, putative	Cytoskeleton_Actin	3.90274	0.000161836	1.30572
Tb11.01.1870	actin-like protein, putative	Cytoskeleton_Actin	2.66236	0.00682367	0.924872
Tb927.3.3020	actin-like protein, putative	Cytoskeleton_Actin	3.97599	0.000525511	0.838975
Tb11.02.1380	actin, putative	Cytoskeleton_Actin	2.80858	0.00382017	0.864079
Tb927.7.4480	adenosine 5'-monophosphoramidase, putative	Nucleotides-Purines	4.3155	2.7961e-05	0.171531
Tb09.211.0350	adenylate kinase	Nucleotides-Purines	4.21413	0.000106532	0.934143
Tb927.2.5660	adenylate kinase, putative	Nucleotides-Purines	2.68332	0.00544544	0.583298
Tb927.10.8580	ADP-ribosylation factor 3, putative ,ADP-ribosylation factor-like protein, putative	Vesicular transport	4.52509	0.000203234	0.756582
Tb11.01.1230	ADP-ribosylation factor GTPase activating protein, putative	Vesicular transport	6.10659	1.1798e-05	0.596492
Tb927.7.6230	ADP-ribosylation factor, putative	Vesicular transport	5.91954	4.95804e-06	0.494396
Tb927.8.5060	ADP-ribosylation factor, putative ,small GTPase, putative	Vesicular transport	3.3504	0.00475735	0.557495
Tb927.4.4980	adrenodoxin precursor, putative	Enzyme	3.15277	0.00561658	1.28806
Tb927.1.2400	alpha tubulin	Cytoskeleton	3.04586	0.000793131	0.969462
Tb927.1.2360	alpha tubulin	Cytoskeleton	3.05034	0.000766453	0.953024
Tb927.1.2340	alpha tubulin	Cytoskeleton	3.05039	0.000766453	0.952951
Tb927.1.2380	alpha tubulin	Cytoskeleton	3.05039	0.000766453	0.952951
Tb927.10.6530	alpha-1,3-mannosyltransferase, putative	Glycan synthesis & metabolism	2.57027	0.00953435	0.919584
Tb09.160.2540	alpha/beta-hydrolase-like protein	Enzyme	2.85631	0.00327757	2.20909
Tb09.160.2600	alpha/beta-hydrolase-like protein	Enzyme	2.85631	0.00327757	2.20909
Tb927.8.2410	amidase, putative	Protease or peptidase	3.36213	0.00173183	1.28562
Tb09.211.3970	ankyrin repeat protein, putative	Cytoskeleton	6.19154	2.58573e-07	0.809375
Tb927.10.14170	aquaporin 9, putative	Ion channel or pump	2.53126	0.00852782	0.397495
Tb927.7.3320	ATG12/APG12, putative	Lysosome	3.38484	0.00237475	0.857654
Tb927.10.9420	ATP-dependent chaperone, putative ,mitochondrial chaperone BCS1, putative	Chaperone	3.38075	0.00219746	0.839719
Tb11.01.8290	ATP-dependent DEAD/H RNA helicase, putative	RNA helicase	3.01524	0.00308452	0.638772
Tb927.10.16150	ATP-dependent zinc metallopeptidase, putative ,metallo-peptidase, Clan MA(E) Family M41	Protease or peptidase	3.07289	0.00215152	0.843463
Tb11.03.0160	ATPase, putative ,cell division control protein 48 homolog, putative	Enzyme	4.17673	6.51564e-05	0.689531
Tb11.12.0007	ATPase, putative ,S. cerevisiae cell division control protein 48 homolog, putative	Enzyme	3.95963	6.56638e-05	0.963124
Tb11.01.5870	atypical dual specificity phosphatase, putative	Phosphatase	3.07671	0.00297731	0.683311
Tb11.01.7970	AUT2/APG4/ATG4 cysteine peptidase, putative	Lysosome	2.94588	0.00484002	0.866628
Tb927.1.2330	beta tubulin	Cytoskeleton	2.53621	0.00519449	0.53565
Tb927.1.2390	beta tubulin	Cytoskeleton	2.53676	0.00517452	0.532851
Tb927.1.2370	beta tubulin	Cytoskeleton	2.51723	0.00569718	0.52976
Tb927.1.2350	beta tubulin	Cytoskeleton	2.5896	0.00418474	0.525893
Tb927.1.2410	beta tubulin, pseudogene	pseudogene	2.55452	0.00457547	0.534445
Tb11.01.1820	Biotin--acetyl-CoA-carboxylase ligase, putative ,biotin--protein ligase, putative	Enzyme	3.82622	0.000168056	0.425172
Tb927.8.2980	Bis(5'-adenosyl)-triphosphatase, putative	Nucleotides-Purines	4.24813	0.00026318	0.740496
Tb927_06_v4.snoRNA.0005	C/D snoRNA	SNO	8.25019	9.42534e-08	12.1421
Tb927_09_v4.snoRNA.0048	C/D snoRNA	SNO	17.5751	1.33114e-15	12.1217
Tb927_09_v4.snoRNA.0052	C/D snoRNA	SNO	17.0056	1.83545e-14	11.9385
Tb927_09_v4.snoRNA.0049	C/D snoRNA	SNO	17.8159	2.96661e-16	11.9339
Tb927_09_v4.snoRNA.0050	C/D snoRNA	SNO	17.8159	2.96661e-16	11.9339
Tb927_11_01_v4.snoRNA.0027	C/D snoRNA	SNO	6.9345	5.74561e-07	11.0377
Tb927_11_01_v4.snoRNA.0026	C/D snoRNA	SNO	6.71777	5.87216e-07	11.0182
Tb927_11_01_v4.snoRNA.0029	C/D snoRNA	SNO	6.71777	5.87216e-07	11.0182
Tb927_11_01_v4.snoRNA.0030	C/D snoRNA	SNO	6.74064	5.47864e-07	10.7934
Tb927_06_v4.snoRNA.0002	C/D snoRNA	SNO	6.71904	3.2805e-05	9.2951
Tb927_11_01_v4.snoRNA.0022	C/D snoRNA	SNO	4.31343	0.00224871	9.25224
Tb927_11_01_v4.snoRNA.0024	C/D snoRNA	SNO	5.53863	0.000127756	9.16843
Tb927_09_v4.snoRNA.0023	C/D snoRNA	SNO	7.72095	2.42549e-05	8.832
Tb927_09_v4.snoRNA.0024	C/D snoRNA	SNO	7.72095	2.42549e-05	8.832
Tb927_09_v4.snoRNA.0025	C/D snoRNA	SNO	7.72095	2.42549e-05	8.832
Tb927_09_v4.snoRNA.0026	C/D snoRNA	SNO	7.72095	2.42549e-05	8.832
Tb927_09_v4.snoRNA.0028	C/D snoRNA	SNO	7.72095	2.42549e-05	8.832
Tb927_09_v4.snoRNA.0029	C/D snoRNA	SNO	7.72095	2.42549e-05	8.832
Tb927_09_v4.snoRNA.0114	C/D snoRNA	SNO	7.29802	4.72382e-05	8.35843
Tb927_11_01_v4.snoRNA.0021	C/D snoRNA	SNO	4.51313	0.00232169	7.49547
Tb927_11_01_v4.snoRNA.0023	C/D snoRNA	SNO	4.51313	0.00232169	7.49547
Tb927_11_01_v4.snoRNA.0025	C/D snoRNA	SNO	4.51313	0.00232169	7.49547
Tb927_08_v4.snoRNA.0024	C/D snoRNA	SNO	11.7379	3.83618e-08	7.06785
Tb927_09_v4.snoRNA.0073	C/D snoRNA	SNO	18.4828	1.00252e-15	6.97967
Tb927_09_v4.snoRNA.0074	C/D snoRNA	SNO	18.4828	1.00252e-15	6.97967
Tb927_09_v4.snoRNA.0075	C/D snoRNA	SNO	18.4828	1.00252e-15	6.97967
Tb927_09_v4.snoRNA.0076	C/D snoRNA	SNO	18.4828	1.00252e-15	6.97967
Tb927_09_v4.snoRNA.0077	C/D snoRNA	SNO	18.4828	1.00252e-15	6.97967
Tb927_09_v4.snoRNA.0078	C/D snoRNA	SNO	18.4828	1.00252e-15	6.97967
Tb927_09_v4.snoRNA.0079	C/D snoRNA	SNO	18.4828	1.00252e-15	6.97967
Tb927_09_v4.snoRNA.0035	C/D snoRNA	SNO	4.19593	0.00271851	6.39442
Tb927_09_v4.snoRNA.0034	C/D snoRNA	SNO	4.12742	0.00547355	6.37001
Tb927_06_v4.snoRNA.0030	C/D snoRNA	SNO	10.8583	1.49632e-07	6.04121
Tb927_06_v4.snoRNA.0031	C/D snoRNA	SNO	10.8583	1.49632e-07	6.04121
Tb927_06_v4.snoRNA.0032	C/D snoRNA	SNO	10.8583	1.49632e-07	6.04121
Tb927_08_v4.snoRNA.0035	C/D snoRNA	SNO	10.2372	1.67926e-09	6.02414
Tb927_08_v4.snoRNA.0036	C/D snoRNA	SNO	11.3531	8.63743e-09	5.74145
Tb927_11_01_v4.snoRNA.0007	C/D snoRNA	SNO	15.4501	1.37921e-12	5.62948
Tb927_09_v4.snoRNA.0033	C/D snoRNA	SNO	5.09529	7.86796e-05	5.31471
Tb927_09_v4.snoRNA.0080	C/D snoRNA	SNO	20.751	7.29557e-17	4.76996
Tb927_09_v4.snoRNA.0084	C/D snoRNA	SNO	13.9289	1.68165e-09	2.38872
Tb927_09_v4.snoRNA.0087	C/D snoRNA	SNO	15.555	3.27392e-12	2.04745
Tb927_09_v4.snoRNA.0083	C/D snoRNA	SNO	16.1511	1.25199e-12	1.82984
Tb927_09_v4.snoRNA.0086	C/D snoRNA	SNO	15.782	2.41352e-12	1.82984
Tb927_09_v4.snoRNA.0082	C/D snoRNA	SNO	15.6095	3.08168e-12	1.82984
Tb927_09_v4.snoRNA.0085	C/D snoRNA	SNO	15.6095	3.08168e-12	1.82984
Tb927_09_v4.snoRNA.0088	C/D snoRNA	SNO	15.6095	3.08168e-12	1.82984
Tb927_09_v4.snoRNA.0100	C/D snoRNA	SNO	16.5493	2.84963e-15	1
Tb927_09_v4.snoRNA.0103	C/D snoRNA	SNO	16.5493	2.84963e-15	1
Tb927_09_v4.snoRNA.0106	C/D snoRNA	SNO	16.5493	2.84963e-15	1
Tb927_09_v4.snoRNA.0102	C/D snoRNA	SNO	16.4926	2.93796e-15	1
Tb927_09_v4.snoRNA.0104	C/D snoRNA	SNO	15.8974	7.29555e-15	1
Tb927_09_v4.snoRNA.0101	C/D snoRNA	SNO	15.1263	2.3025e-14	1
Tb927_09_v4.snoRNA.0105	C/D snoRNA	SNO	15.092	2.37245e-14	1
Tb11.01.0290	carbonic anhydrase-like protein	Enzyme	2.93133	0.00299964	0.920389
Tb927.6.4660	cationic amino acid transporter, putative	Amino acid transporter	2.77619	0.0063116	1.03568
Tb927.8.7010	chaperone protein DNAj, putative	Chaperone	3.71029	0.000300206	0.896168
Tb09.211.4720	chaperone protein DNAj, putative	Chaperone	2.69505	0.00761003	0.896091
Tb927.10.8540	chaperone protein DNAj, putative	Chaperone	8.23252	2.65775e-09	0.789993
Tb11.01.8480	chaperone protein DNAj, putative	Chaperone	3.14654	0.00157271	0.748021
Tb927.7.6200	chaperone protein DNAj, putative	Chaperone	2.85748	0.0094073	0.677614
Tb927.8.1030	chaperone protein DNAj, putative	Chaperone	3.38642	0.00379432	0.635434
Tb927.6.2480	chaperone protein DNAj, putative	Mitochondrial translation	4.15583	7.14203e-05	1.13249
Tb11.01.4600	cleavage and polyadenylation specificity factor 30 kDa subunit ,CPSF 30 kDa subunit ,NS1 effector domain- binding protein 1	RNA processing	3.65236	0.000307139	0.940182
Tb927.10.7800	cop9 signalosome complex subunit, putative ,predicted PCI domain protein	Vesicular transport	2.83697	0.00512931	0.805729
Tb09.211.2850	cyclophilin type peptidyl-prolyl cis-trans isomerase, putative	Chaperone	3.24863	0.00116412	0.865263
Tb09.160.2070	cyclophilin type peptidyl-prolyl cis-trans isomerase, putative	Chaperone	3.27846	0.00132933	0.800873
Tb11.01.1215	cyclophilin type peptidyl-prolyl cis-trans isomerase, putative	Mitochondrial translation	4.87251	4.99168e-05	0.56887
Tb927.7.4770	cyclophilin-type peptidyl-prolyl cis-trans isomerase, putative	Chaperone	2.79602	0.00236893	0.877493
Tb927.8.5230	cyclophilin-type peptidyl-prolyl cis-trans isomerase, putative ,PPIase, putative ,rotamase, putative ,cyclophilin, putative	Chaperone	2.94821	0.00431292	0.876191
Tb927.6.1060	cysteine peptidase precursor ,cysteine peptidase, Clan CA, family C1, Cathepsin L-like	Protease or peptidase	4.49565	4.26124e-06	1.4301
Tb927.6.1050	cysteine peptidase precursor ,cysteine peptidase, Clan CA, family C1, Cathepsin L-like	Protease or peptidase	4.76857	1.98421e-06	1.42752
Tb927.6.970	cysteine peptidase precursor ,cysteine peptidase, Clan CA, family C1, Cathepsin L-like	Protease or peptidase	4.47262	4.66067e-06	1.42021
Tb927.6.1010	cysteine peptidase precursor ,cysteine peptidase, Clan CA, family C1, Cathepsin L-like	Protease or peptidase	4.49535	4.33656e-06	1.41212
Tb927.6.960	cysteine peptidase precursor ,cysteine peptidase, Clan CA, family C1, Cathepsin L-like	Protease or peptidase	4.49535	4.33656e-06	1.41212
Tb927.6.990	cysteine peptidase precursor ,cysteine peptidase, Clan CA, family C1, Cathepsin L-like	Protease or peptidase	4.78738	1.90626e-06	1.37559
Tb927.6.1030	cysteine peptidase precursor ,cysteine peptidase, Clan CA, family C1, Cathepsin L-like	Protease or peptidase	4.8884	1.55425e-06	1.33382
Tb927.6.1040	cysteine peptidase precursor ,cysteine peptidase, Clan CA, family C1, Cathepsin L-like	Protease or peptidase	4.8884	1.55425e-06	1.33382
Tb927.6.1000	cysteine peptidase precursor ,cysteine peptidase, Clan CA, family C1, Cathepsin L-like	Protease or peptidase	4.88047	1.5447e-06	1.32046
Tb927.6.1020	cysteine peptidase precursor ,cysteine peptidase, Clan CA, family C1, Cathepsin L-like	Protease or peptidase	4.82197	1.81227e-06	1.31864
Tb927.6.980	cysteine peptidase precursor ,cysteine peptidase, Clan CA, family C1, Cathepsin L-like	Protease or peptidase	4.86613	1.68885e-06	1.31431
Tb927.3.3470	cytochrome b5, putative	Mitochondrial electron transport	3.44519	0.00688193	0.883668
Tb11.02.4485	cytochrome b5, putative	Mitochondrial electron transport	5.60438	3.79137e-05	0.690613
Tb927.3.2650	cytochrome c oxidase copper chaperone, putative	Mitochondrial electron transport	4.10339	0.00047236	0.549457
Tb11.01.3780	cytochrome oxidase assembly protein, putative	Mitochondrial electron transport	3.74338	0.00302928	1.80475
Tb09.244.2760	cytosolic coat protein, putative	Vesicular transport	3.30288	0.000732311	0.875605
Tb11.01.3040	cytosolic malate dehydrogenase	Glucose & glycerol	3.22728	0.000596105	0.901047
Tb927.7.5680	deoxyribose-phosphate aldolase, putative	Enzyme	3.08702	0.00321151	0.853908
Tb09.160.2990	DNA-damage inducible protein DDI1-like protein	DNA synthesis, modification, repair	3.05106	0.00490746	0.721893
Tb927.3.5500	DNA-directed RNA polymerase II subunit 3, putative ,RNA polymerase subunit, putative	RNA synthesis II	3.48769	0.000278142	0.923666
Tb927.4.3510	DNA-directed RNA polymerase subunit, putative	RNA synthesis	3.28659	0.00122846	0.746835
Tb927.4.3490	DNA-directed RNA polymerase subunit, putative ,RNA polymerase subunit, putative	RNA synthesis II	3.43791	0.000873757	0.734183
Tb11.01.2190	DNA-directed RNA polymerase, putative	RNA synthesis I	3.21355	0.00647282	1.52285
Tb927.6.2540	DREV methyltransferase, putative	Enzyme	2.95302	0.00668863	0.888589
Tb927.10.13370	dynein light chain, putative ,dynein Tctex1 family, putative	Cytoskeleton	3.98053	0.000268993	0.748983
Tb11.02.1135	dynein light chain, putative ,dynein Tctex1 family, putative	Cytoskeleton	2.90053	0.00445825	0.435756
Tb11.02.5620	dynein light chain, putative ,dynein Tctex2 family, putative	Cytoskeleton	3.65557	0.0030911	0.630615
Tb927.8.7000	E1-like ubiquitin-activating enzyme, putative	Ubiquitin & proteasome	4.23542	7.35614e-05	1.41672
Tb927.10.2890	enolase	Glucose & glycerol	2.76561	0.00284346	0.138502
Tb927.3.4850	enoyl-CoA hydratase, mitochondrial precursor, putative	Lipids & fatty acids	2.50593	0.00731071	1.2954
Tb11.01.8200	enoyl-CoA hydratase/isomerase family protein, putative	Lipids & fatty acids	3.08295	0.00409437	0.878689
Tb927.6.520	EP3-2 procyclin ,PARP A-beta ,surface protein EP3-3 procyclin precursor ,procyclic form specific polypeptide A-beta precursor	Membrane	3.71476	0.000828337	1.62622
Tb09.160.5160	exosome complex exonuclease RRP40	RNA degradation	2.83164	0.00642916	0.912437
Tb11.01.2820	exosome-associated protein 4	RNA degradation	2.82887	0.00522933	1.71102
Tb11.55.0028	expression site-associated gene (ESAG) protein, putative ,expression site-associated gene 3 (ESAG3) protein, putative	ESAG	5.18251	3.17967e-05	1.37324
Tb927.10.4370	expression site-associated gene (ESAG) protein, putative ,expression site-associated gene 3 (ESAG3) protein, putative	ESAG	5.89195	4.25398e-06	0.895668
Tb927.10.7520	folylpolyglutamate synthase, putative	Folate	3.47364	0.000776261	1.12479
Tb09.211.2730	Gim5A protein ,glycosomal membrane protein	Glycosome biogenesis	3.13941	0.000546508	0.306341
Tb09.211.2740	Gim5B protein ,glycosomal membrane protein	Glycosome biogenesis	3.00557	0.000962529	0.280922
Tb927.6.4300	glyceraldehyde 3-phosphate dehydrogenase, glycosomal	Glucose & glycerol	3.47044	0.000152579	0.24641
Tb927.6.4280	glyceraldehyde 3-phosphate dehydrogenase, glycosomal	Glucose & glycerol	3.46963	0.000152985	0.24641
Tb09.211.3560	glycerol kinase, glycosomal	Glucose & glycerol	2.4593	0.00972234	0.154716
Tb09.211.3570	glycerol kinase, glycosomal	Glucose & glycerol	2.45311	0.00974031	0.148405
Tb09.211.3590	glycerol kinase, glycosomal	Glucose & glycerol	2.4622	0.00948273	0.14584
Tb927.8.3530	glycerol-3-phosphate dehydrogenase [NAD%2B], glycosomal	Glucose & glycerol	2.76256	0.00228837	0.328221
Tb11.02.0440	glycerolphosphate mutase, putative	Glucose & glycerol	2.90282	0.00328899	0.981731
Tb11.01.1440	glycine synthase, putative	Amino acid metabolism	4.21328	0.000241869	1.16974
Tb11.01.2030	golgi SNARE protein-like ,GOLGI SNAP receptor complex member, putative	Vesicular transport	3.10733	0.00293939	0.803589
Tb927.3.3720	Golgi vesicular membrane trafficking protein, putative	Vesicular transport	4.46924	0.000159392	0.886034
Tb11.01.7400	GPI transamidase	GPI anchors & metabolism	4.42613	1.94051e-05	1.57044
Tb927.10.210	GPI transamidase component GAA1	GPI anchors & metabolism	2.59335	0.00868117	1.21432
Tb927.6.4120	GTPase activating protein, putative	Signalling	3.03968	0.00430384	0.941658
Tb11.01.3170	guanine nucleotide-binding protein beta subunit- like protein ,activated protein kinase c receptor	Translation	3.58547	0.000111672	1
Tb11.01.3180	guanine nucleotide-binding protein beta subunit-like protein ,activated protein kinase c receptor	Translation	3.57236	0.000122739	1
Tb11_snoRNA_0038	H/ACA snoRNA, TB11Cs2H1 ,snoRNA TBR17	SNO	4.27685	4.70991e-06	4.55097
Tb11_snoRNA_0041	H/ACA snoRNA, TB11Cs2H1 ,snoRNA TBR17	SNO	4.27889	6.29252e-06	4.52501
Tb927_09_v4.snoRNA.0089	H/ACA-like snoRNA	SNO	6.74946	2.88655e-06	10.1515
Tb927_09_v4.snoRNA.0090	H/ACA-like snoRNA	SNO	6.74946	2.88655e-06	10.1515
Tb927_09_v4.snoRNA.0095	H/ACA-like snoRNA	SNO	28.7155	5.97801e-19	8.56472
Tb927_11_01_v4.snoRNA.0032	H/ACA-like snoRNA	SNO	20.3028	7.2911e-11	8.27959
Tb927_09_v4.snoRNA.0096	H/ACA-like snoRNA	SNO	27.6992	1.12525e-18	8.11691
Tb927_06_v4.snoRNA.0012	H/ACA-like snoRNA	SNO	31.0116	5.56601e-18	7.86579
Tb927_06_v4.snoRNA.0013	H/ACA-like snoRNA	SNO	31.0116	5.56601e-18	7.86579
Tb927_06_v4.snoRNA.0014	H/ACA-like snoRNA	SNO	31.0116	5.56601e-18	7.86579
Tb927_06_v4.snoRNA.0034	H/ACA-like snoRNA	SNO	10.2491	9.45298e-11	7.15498
Tb927_06_v4.snoRNA.0036	H/ACA-like snoRNA	SNO	10.2491	9.45298e-11	7.15498
Tb927_06_v4.snoRNA.0038	H/ACA-like snoRNA	SNO	10.2491	9.45298e-11	7.15498
Tb927_06_v4.snoRNA.0035	H/ACA-like snoRNA	SNO	10.769	4.15552e-11	6.98251
Tb927_11_01_v4.snoRNA.0031	H/ACA-like snoRNA	SNO	18.3641	1.38781e-10	6.66177
Tb927_06_v4.snoRNA.0017	H/ACA-like snoRNA	SNO	10.7092	4.67772e-08	6.22252
Tb927_06_v4.snoRNA.0018	H/ACA-like snoRNA	SNO	12.4158	2.93431e-12	5.81693
Tb927_06_v4.snoRNA.0019	H/ACA-like snoRNA	SNO	12.4158	2.93431e-12	5.81693
Tb927_06_v4.snoRNA.0020	H/ACA-like snoRNA	SNO	12.4158	2.93431e-12	5.81693
Tb927_06_v4.snoRNA.0021	H/ACA-like snoRNA	SNO	12.4158	2.93431e-12	5.81693
Tb11.01.3380	histone acetyltransferase, putative	Chromatin	2.95808	0.00276894	1.10759
Tb927.7.2820	histone H2A, putative	Chromatin	4.87088	1.64996e-06	2.94939
Tb927.7.2830	histone H2A, putative	Chromatin	4.8523	1.74826e-06	2.86575
Tb927.7.2840	histone H2A, putative	Chromatin	4.8523	1.74826e-06	2.86575
Tb927.7.2850	histone H2A, putative	Chromatin	4.8523	1.74826e-06	2.86575
Tb927.7.2880	histone H2A, putative	Chromatin	4.8523	1.74826e-06	2.86575
Tb927.7.2890	histone H2A, putative	Chromatin	4.8523	1.74826e-06	2.86575
Tb927.7.2900	histone H2A, putative	Chromatin	4.8523	1.74826e-06	2.86575
Tb927.7.2910	histone H2A, putative	Chromatin	4.8523	1.74826e-06	2.86575
Tb927.7.2920	histone H2A, putative	Chromatin	4.8523	1.74826e-06	2.86575
Tb927.7.2930	histone H2A, putative	Chromatin	4.85398	1.74826e-06	2.84305
Tb927.7.2860	histone H2A, putative	Chromatin	4.8079	1.9541e-06	2.60534
Tb927.7.2870	histone H2A, putative	Chromatin	4.8079	1.9541e-06	2.60534
Tb927.7.2940	histone H2A, putative	Chromatin	4.8079	1.9541e-06	2.60534
Tb927.10.10480	histone H2B, putative	Chromatin	2.80669	0.00360826	1.14689
Tb927.10.10520	histone H2B, putative	Chromatin	2.80669	0.00360826	1.14689
Tb927.1.2490	histone H3, putative	Chromatin	2.72387	0.00233214	0.761469
Tb927.1.2470	histone H3, putative	Chromatin	2.54789	0.00475956	0.74129
Tb927.1.2530	histone H3, putative	Chromatin	2.5475	0.00475956	0.739415
Tb927.1.2430	histone H3, putative	Chromatin	2.5722	0.00437279	0.732725
Tb927.1.2510	histone H3, putative	Chromatin	2.5722	0.00437279	0.732725
Tb927.1.2550	histone H3, putative	Chromatin	2.5722	0.00437279	0.732725
Tb927.1.2450	histone H3, putative	Chromatin	2.57262	0.00437013	0.732664
Tb927.5.4180	histone H4, putative	Chromatin	5.43179	3.97997e-07	1.11499
Tb927.5.4260	histone H4, putative	Chromatin	5.26638	1.11796e-06	1.06837
Tb927.5.4170	histone H4, putative	Chromatin	4.43375	9.55512e-06	1.00977
Tb927.5.4190	histone H4, putative	Chromatin	4.73974	2.28902e-05	0.822606
Tb927.5.4220	histone H4, putative	Chromatin	4.74172	2.18071e-05	0.822266
Tb927.5.4200	histone H4, putative	Chromatin	5.16869	1.52694e-06	0.687488
Tb927.5.4240	histone H4, putative	Chromatin	5.17227	1.50984e-06	0.685405
Tb927.5.4250	histone H4, putative	Chromatin	5.17227	1.50984e-06	0.685405
Tb927.5.4210	histone H4, putative	Chromatin	5.29378	0.000764138	0.682129
Tb927.5.4230	histone H4, putative	Chromatin	5.29378	0.000764138	0.682129
Tb927.3.5340	Hsc70-interacting protein (Hip), putative	Chaperone	6.59428	2.5679e-08	0.548189
Tb927.10.6660	hypothetical protein	0	8.02308	1.21782e-05	11.8738
Tb927.10.1760	hypothetical protein	0	6.29998	0.000311826	9.34078
Tb927.10.15030	hypothetical protein	0	4.54227	0.000905802	6.31238
Tb927.10.6890	hypothetical protein	0	6.78871	1.29127e-08	1.72973
Tb927.10.9510	hypothetical protein	0	4.53759	1.76482e-05	1.4489
Tb09.160.1670	hypothetical protein	0	4.17735	9.25904e-05	1.0791
Tb927.7.7370	hypothetical protein	0	3.63632	0.00489291	0.947175
Tb927.7.5070	hypothetical protein	0	2.92687	0.00238374	0.919059
Tb11.02.2370	hypothetical protein	0	3.17205	0.00364471	0.883825
Tb927.7.6100	hypothetical protein	0	3.8364	0.000545245	0.865931
Tb927.7.4720	hypothetical protein	0	5.98602	3.07747e-05	0.816917
Tb927.10.4030	hypothetical protein	0	3.71015	0.00329694	0.802196
Tb927.4.1010	hypothetical protein	0	3.3354	0.00866631	0.791772
Tb927.8.7550	hypothetical protein	0	3.72535	0.00227162	0.739894
Tb927.10.9580	hypothetical protein	0	3.26322	0.00728559	0.69674
Tb11.02.2400	hypothetical protein	0	3.52446	0.00437013	0.602076
Tb927.4.3650	hypothetical protein	0	3.82652	0.000717404	0.559654
Tb927.10.14940	hypothetical protein	0	4.61727	0.00949011	0.54685
Tb927.8.3670	hypothetical protein	0	4.71866	0.000828337	0.201684
Tb927.10.11420	hypothetical protein, conserved	0	4.39024	3.80956e-05	18.2399
Tb927.10.11410	hypothetical protein, conserved	0	3.3742	0.00106919	11.6903
Tb927.10.13390	hypothetical protein, conserved	0	2.46012	0.00838418	8.87968
Tb11.01.1380	hypothetical protein, conserved	0	4.03932	0.000126625	8.59942
Tb927.1.2985	hypothetical protein, conserved	0	3.48997	0.00355898	8.44816
Tb927.10.13690	hypothetical protein, conserved	0	2.61306	0.00476644	8.43351
Tb927.10.13770	hypothetical protein, conserved	0	3.81734	0.00233553	2.46912
Tb927.10.12270	hypothetical protein, conserved	0	5.31846	0.000158037	2.41574
Tb927.10.15820	hypothetical protein, conserved	0	4.08783	0.000307993	2.3033
Tb927.10.15830	hypothetical protein, conserved	0	3.57374	0.000760245	2.06011
Tb927.10.8140	hypothetical protein, conserved	0	6.0387	2.03051e-06	1.99299
Tb11.01.6700	hypothetical protein, conserved	0	3.89442	0.00180323	1.9217
Tb11.01.1090	hypothetical protein, conserved	0	2.88219	0.00671446	1.90122
Tb927.10.11400	hypothetical protein, conserved	0	5.0293	0.000172642	1.79883
Tb11.02.1610	hypothetical protein, conserved	0	3.86489	0.000513099	1.62499
Tb927.4.1580	hypothetical protein, conserved	0	2.76398	0.00512931	1.61782
Tb927.8.2830	hypothetical protein, conserved	0	4.82339	1.81721e-05	1.61251
Tb927.8.1730	hypothetical protein, conserved	0	3.52678	0.00354005	1.5939
Tb927.7.4680	hypothetical protein, conserved	0	3.08047	0.00588684	1.58944
Tb11.01.4190	hypothetical protein, conserved	0	4.40904	6.28081e-05	1.58755
Tb11.01.4110	hypothetical protein, conserved	0	4.57225	0.00569782	1.57803
Tb927.3.2740	hypothetical protein, conserved	0	3.43398	0.000315963	1.56017
Tb09.160.1030	hypothetical protein, conserved	0	5.38034	1.41633e-06	1.54817
Tb11.01.2750	hypothetical protein, conserved	0	3.08565	0.00514353	1.5447
Tb11.01.7070	hypothetical protein, conserved	0	2.80838	0.00402857	1.54372
Tb09.160.3880	hypothetical protein, conserved	0	5.41133	3.8453e-06	1.51524
Tb927.7.1010	hypothetical protein, conserved	0	4.57041	0.000198277	1.50982
Tb927.8.2800	hypothetical protein, conserved	0	3.0017	0.00363657	1.49556
Tb11.01.4990	hypothetical protein, conserved	0	3.53904	0.00204835	1.48238
Tb927.7.1490	hypothetical protein, conserved	0	3.56645	0.00204835	1.47843
Tb927.10.8160	hypothetical protein, conserved	0	3.89073	0.00252957	1.47546
Tb927.10.11920	hypothetical protein, conserved	0	4.28653	0.000244832	1.47034
Tb927.7.5010	hypothetical protein, conserved	0	5.66365	9.10833e-07	1.46201
Tb09.160.4690	hypothetical protein, conserved	0	3.53569	0.00525171	1.45746
Tb927.7.1820	hypothetical protein, conserved	0	3.92069	6.28179e-05	1.45309
Tb927.7.1860	hypothetical protein, conserved	0	3.92069	6.28179e-05	1.45309
Tb11.01.3030	hypothetical protein, conserved	0	4.46032	8.54575e-05	1.43785
Tb927.7.7340	hypothetical protein, conserved	0	2.75856	0.00826724	1.43354
Tb927.1.3040	hypothetical protein, conserved	0	3.89903	0.000317124	1.42627
Tb11.02.4160	hypothetical protein, conserved	0	6.06625	6.49684e-07	1.40548
Tb09.160.2230	hypothetical protein, conserved	0	3.92487	0.000462843	1.39884
Tb927.7.5270	hypothetical protein, conserved	0	4.79097	2.96717e-05	1.34239
Tb09.211.2620	hypothetical protein, conserved	0	4.77359	2.63747e-05	1.33947
Tb09.160.2160	hypothetical protein, conserved	0	3.43039	0.00197542	1.33338
Tb11.02.1010	hypothetical protein, conserved	0	3.30576	0.00330778	1.32798
Tb927.8.3600	hypothetical protein, conserved	0	5.88987	2.07703e-06	1.32441
Tb927.2.4980	hypothetical protein, conserved	0	5.54559	7.31295e-06	1.32211
Tb927.10.7980	hypothetical protein, conserved	0	3.13644	0.0025825	1.3221
Tb927.4.1570	hypothetical protein, conserved	0	3.195	0.00124566	1.31362
Tb11.01.0590	hypothetical protein, conserved	0	2.90167	0.00431819	1.3128
Tb927.10.11530	hypothetical protein, conserved	0	4.18105	0.000129741	1.30872
Tb11.01.2840	hypothetical protein, conserved	0	3.49663	0.00113295	1.29457
Tb927.3.4520	hypothetical protein, conserved	0	3.52093	0.000496312	1.29003
Tb11.02.4535	hypothetical protein, conserved	0	3.35611	0.00313877	1.28649
Tb927.10.7670	hypothetical protein, conserved	0	3.28684	0.00330678	1.28109
Tb927.2.4800	hypothetical protein, conserved	0	7.00027	1.16496e-08	1.2681
Tb927.7.3290	hypothetical protein, conserved	0	3.66006	0.000270862	1.25989
Tb927.6.2200	hypothetical protein, conserved	0	3.84605	0.000143476	1.25722
Tb927.4.700	hypothetical protein, conserved	0	6.93522	6.49369e-08	1.24741
Tb11.52.0019	hypothetical protein, conserved	0	4.11756	0.000504217	1.2463
Tb927.8.2180	hypothetical protein, conserved	0	3.62837	0.00209073	1.24246
Tb927.7.4630	hypothetical protein, conserved	0	3.60779	0.000689546	1.23657
Tb927.10.10180	hypothetical protein, conserved	0	2.82444	0.00884044	1.22421
Tb11.02.0480	hypothetical protein, conserved	0	3.13813	0.00382188	1.21788
Tb11.02.1750	hypothetical protein, conserved	0	3.51005	0.00418069	1.21204
Tb927.10.8010	hypothetical protein, conserved	0	3.36127	0.00142837	1.20721
Tb09.211.1300	hypothetical protein, conserved	0	5.67431	4.45454e-07	1.20053
Tb927.2.3190	hypothetical protein, conserved	0	3.34138	0.00166596	1.19869
Tb09.211.4450	hypothetical protein, conserved	0	3.13365	0.0015153	1.19486
Tb927.4.1600	hypothetical protein, conserved	0	3.22287	0.00322652	1.18785
Tb927.10.14620	hypothetical protein, conserved	0	3.0006	0.00135195	1.18278
Tb09.160.1260	hypothetical protein, conserved	0	3.75632	0.000176965	1.171
Tb11.02.0680	hypothetical protein, conserved	0	4.0722	0.000161752	1.1684
Tb927.4.950	hypothetical protein, conserved	0	3.18346	0.00306398	1.16714
Tb927.10.14740	hypothetical protein, conserved	0	2.90707	0.00184329	1.16712
Tb927.8.5040	hypothetical protein, conserved	0	3.09895	0.00323334	1.15404
Tb927.7.5120	hypothetical protein, conserved	0	3.31753	0.00110034	1.15338
Tb927.5.4090	hypothetical protein, conserved	0	3.2398	0.00184733	1.15087
Tb927.8.6230	hypothetical protein, conserved	0	2.96028	0.00230175	1.14646
Tb927.6.4620	hypothetical protein, conserved	0	4.5124	4.43333e-05	1.13651
Tb927.10.1740	hypothetical protein, conserved	0	3.88982	0.000321355	1.13553
Tb927.8.4690	hypothetical protein, conserved	0	2.96931	0.00519517	1.13082
Tb927.3.3010	hypothetical protein, conserved	0	3.40553	0.00116556	1.12898
Tb927.10.7750	hypothetical protein, conserved	0	3.06222	0.0037254	1.12844
Tb927.6.3420	hypothetical protein, conserved	0	2.9568	0.00297731	1.12714
Tb11.02.1880	hypothetical protein, conserved	0	4.42291	0.000722467	1.11822
Tb11.12.0008	hypothetical protein, conserved	0	4.59263	1.02789e-05	1.11393
Tb927.8.6020	hypothetical protein, conserved	0	3.77468	0.000319834	1.11328
Tb11.03.0470	hypothetical protein, conserved	0	3.09899	0.00201313	1.11255
Tb09.160.2440	hypothetical protein, conserved	0	3.4237	0.00195334	1.11216
Tb927.10.1730	hypothetical protein, conserved	0	3.90917	0.000152579	1.10964
Tb927.7.5810	hypothetical protein, conserved	0	3.76603	0.000282802	1.10323
Tb927.3.3790	hypothetical protein, conserved	0	3.50333	0.000310042	1.10191
Tb927.8.5320	hypothetical protein, conserved	0	4.83017	1.20784e-05	1.10165
Tb927.8.2110	hypothetical protein, conserved	0	3.05548	0.00218353	1.09734
Tb927.10.4970	hypothetical protein, conserved	0	3.27379	0.00266981	1.09277
Tb927.8.3070	hypothetical protein, conserved	0	4.54435	0.000136573	1.08963
Tb927.2.4530	hypothetical protein, conserved	0	2.84905	0.00648599	1.08876
Tb927.7.1350	hypothetical protein, conserved	0	3.20649	0.00317198	1.08836
Tb11.02.5750	hypothetical protein, conserved	0	4.98646	1.82875e-05	1.08542
Tb927.8.6280	hypothetical protein, conserved	0	3.18929	0.00419929	1.08454
Tb11.01.8070	hypothetical protein, conserved	0	5.28469	1.33451e-05	1.08322
Tb927.5.2110	hypothetical protein, conserved	0	3.76543	0.000573664	1.08289
Tb11.01.6290	hypothetical protein, conserved	0	3.8029	0.00165647	1.08047
Tb09.211.0440	hypothetical protein, conserved	0	3.50858	0.000915162	1.08012
Tb927.10.6020	hypothetical protein, conserved	0	4.23633	5.8764e-05	1.07623
Tb11.02.1920	hypothetical protein, conserved	0	4.60085	7.10617e-05	1.07555
Tb11.01.8775	hypothetical protein, conserved	0	3.60754	0.000409727	1.07541
Tb11.02.0465	hypothetical protein, conserved	0	7.69663	4.85796e-08	1.07171
Tb927.4.1290	hypothetical protein, conserved	0	3.11806	0.00811599	1.07152
Tb09.160.1660	hypothetical protein, conserved	0	2.90299	0.00683262	1.07065
Tb927.6.2260	hypothetical protein, conserved	0	3.64797	0.000245024	1.0543
Tb927.6.2320	hypothetical protein, conserved	0	3.64797	0.000245024	1.0543
Tb927.5.4510	hypothetical protein, conserved	0	4.54251	0.000619719	1.04802
Tb927.5.1350	hypothetical protein, conserved	0	2.85733	0.00450859	1.04246
Tb09.160.3540	hypothetical protein, conserved	0	2.9141	0.00683262	1.04156
Tb927.1.1990	hypothetical protein, conserved	0	2.93687	0.00972631	1.03781
Tb927.10.10310	hypothetical protein, conserved	0	2.88016	0.00363657	1.03473
Tb927.5.4050	hypothetical protein, conserved	0	5.20533	1.89575e-05	1.03427
Tb09.160.5570	hypothetical protein, conserved	0	4.6099	9.74519e-06	1.03064
Tb927.2.2390	hypothetical protein, conserved	0	4.23665	0.000154912	1.03058
Tb927.10.12880	hypothetical protein, conserved	0	2.99794	0.00271851	1.03047
Tb927.10.12350	hypothetical protein, conserved	0	3.08693	0.0081173	1.02675
Tb927.8.7030	hypothetical protein, conserved	0	2.64039	0.0069696	1.02512
Tb11.02.1620	hypothetical protein, conserved	0	3.9312	0.000319834	1.02367
Tb927.4.1730	hypothetical protein, conserved	0	3.21015	0.00413862	1.02274
Tb927.8.3360	hypothetical protein, conserved	0	3.53693	0.00578668	1.01975
Tb927.6.4790	hypothetical protein, conserved	0	5.54536	3.80643e-06	1.01931
Tb11.02.5460	hypothetical protein, conserved	0	2.88702	0.00323808	1.01884
Tb927.6.4310	hypothetical protein, conserved	0	4.71086	5.01603e-06	1.01595
Tb927.6.2160	hypothetical protein, conserved	0	2.68113	0.0096236	1.01486
Tb927.7.2990	hypothetical protein, conserved	0	2.63051	0.00580347	1.01236
Tb11.01.8720	hypothetical protein, conserved	0	2.89343	0.00574055	1.01103
Tb927.10.10720	hypothetical protein, conserved	0	3.09496	0.00117641	1.01077
Tb927.10.1750	hypothetical protein, conserved	0	5.64154	2.90019e-06	1.00789
Tb927.10.10640	hypothetical protein, conserved	0	4.8667	0.000759396	1.00608
Tb11.02.1030	hypothetical protein, conserved	0	5.0438	1.33986e-05	1.00523
Tb927.8.2510	hypothetical protein, conserved	0	2.71663	0.00907659	1.00436
Tb927.8.6040	hypothetical protein, conserved	0	6.66205	1.20767e-08	1
Tb11.03.0300	hypothetical protein, conserved	0	4.33535	1.72806e-05	1
Tb927.10.7910	hypothetical protein, conserved	0	3.08775	0.00789717	0.998301
Tb927.5.4370	hypothetical protein, conserved	0	4.11439	0.00062642	0.997783
Tb927.8.2230	hypothetical protein, conserved	0	2.87272	0.00601731	0.9952
Tb09.160.1100	hypothetical protein, conserved	0	4.26304	3.15705e-05	0.990354
Tb927.8.5520	hypothetical protein, conserved	0	5.77999	9.25719e-06	0.989971
Tb927.6.2990	hypothetical protein, conserved	0	5.14018	2.46693e-06	0.985749
Tb11.01.5640	hypothetical protein, conserved	0	3.03338	0.00412495	0.984956
Tb927.7.3390	hypothetical protein, conserved	0	3.08349	0.00290519	0.984697
Tb927.10.11520	hypothetical protein, conserved	0	3.67728	0.000859378	0.982671
Tb927.1.4470	hypothetical protein, conserved	0	3.7479	0.000400908	0.982665
Tb09.160.5050	hypothetical protein, conserved	0	4.68779	6.30522e-05	0.980785
Tb11.01.4430	hypothetical protein, conserved	0	3.31968	0.00115967	0.977631
Tb11.01.3620	hypothetical protein, conserved	0	3.60382	0.00129145	0.977607
Tb927.3.2350	hypothetical protein, conserved	0	4.29164	0.000396676	0.975892
Tb927.10.14660	hypothetical protein, conserved	0	3.61479	0.00084193	0.975226
Tb927.10.11230	hypothetical protein, conserved	0	5.39255	2.12413e-05	0.972931
Tb927.6.2240	hypothetical protein, conserved	0	3.68628	0.00143184	0.969746
Tb927.7.4210	hypothetical protein, conserved	0	5.83779	0.000424394	0.968508
Tb927.10.8060	hypothetical protein, conserved	0	4.60612	1.00397e-05	0.967856
Tb927.7.3030	hypothetical protein, conserved	0	2.59428	0.00636355	0.967476
Tb927.10.11500	hypothetical protein, conserved	0	4.18032	0.000175048	0.966298
Tb11.02.0590	hypothetical protein, conserved	0	4.91541	4.54224e-05	0.965926
Tb927.5.4290	hypothetical protein, conserved	0	3.5207	0.00266552	0.96302
Tb11.57.0001	hypothetical protein, conserved	0	2.99505	0.00539809	0.962073
Tb927.7.6400	hypothetical protein, conserved	0	3.0213	0.00169233	0.961275
Tb09.211.0530	hypothetical protein, conserved	0	3.33728	0.00150325	0.959963
Tb11.18.0010	hypothetical protein, conserved	0	2.90408	0.00419721	0.957885
Tb927.7.5520	hypothetical protein, conserved	0	4.70868	1.50979e-05	0.957812
Tb09.160.2170	hypothetical protein, conserved	0	3.41572	0.00162947	0.956187
Tb927.10.1860	hypothetical protein, conserved	0	5.16193	3.49638e-06	0.954105
Tb09.160.0380	hypothetical protein, conserved	0	2.99338	0.00215315	0.951456
Tb927.8.1530	hypothetical protein, conserved	0	5.17424	3.19342e-06	0.946277
Tb927.3.3880	hypothetical protein, conserved	0	5.05394	3.83005e-05	0.946138
Tb927.6.4240	hypothetical protein, conserved	0	3.23234	0.00133882	0.946106
Tb927.10.1370	hypothetical protein, conserved	0	4.33768	9.99109e-05	0.945579
Tb09.160.3320	hypothetical protein, conserved	0	3.30972	0.000830015	0.945058
Tb927.2.5830	hypothetical protein, conserved	0	5.70732	0.000114103	0.942122
Tb927.10.4810	hypothetical protein, conserved	0	5.65074	4.36935e-06	0.940646
Tb09.211.1740	hypothetical protein, conserved	0	6.9118	5.01599e-07	0.940394
Tb927.8.6990	hypothetical protein, conserved	0	3.41861	0.00315227	0.938324
Tb927.5.1800	hypothetical protein, conserved	0	4.8609	3.00982e-06	0.936504
Tb927.10.15890	hypothetical protein, conserved	0	4.1708	0.000428208	0.936403
Tb11.01.0800	hypothetical protein, conserved	0	2.60044	0.00761255	0.934144
Tb927.10.12930	hypothetical protein, conserved	0	3.03269	0.00554132	0.933675
Tb927.4.4690	hypothetical protein, conserved	0	3.64824	0.000244699	0.933255
Tb11.02.4390	hypothetical protein, conserved	0	4.26122	3.7404e-05	0.931536
Tb927.3.2300	hypothetical protein, conserved	0	3.30606	0.00398961	0.930479
Tb927.8.2130	hypothetical protein, conserved	0	3.02809	0.00380788	0.930331
Tb927.1.3390	hypothetical protein, conserved	0	10.5837	4.21494e-09	0.929921
Tb927.7.5100	hypothetical protein, conserved	0	3.46134	0.000893793	0.927697
Tb11.01.2210	hypothetical protein, conserved	0	4.09456	0.00073236	0.92726
Tb09.160.1710	hypothetical protein, conserved	0	4.30793	0.00097258	0.926837
Tb09.160.0850	hypothetical protein, conserved	0	3.77121	0.000257474	0.925111
Tb09.211.1290	hypothetical protein, conserved	0	5.23965	7.1113e-06	0.9232
Tb11.02.4900	hypothetical protein, conserved	0	3.25324	0.00312037	0.922738
Tb927.7.5710	hypothetical protein, conserved	0	3.11549	0.00318747	0.922576
Tb927.7.4760	hypothetical protein, conserved	0	3.54656	0.000759335	0.921325
Tb11.01.7980	hypothetical protein, conserved	0	3.34785	0.00136941	0.919444
Tb927.4.1380	hypothetical protein, conserved	0	6.40525	0.000360101	0.919319
Tb11.03.0200	hypothetical protein, conserved	0	3.32893	0.000739727	0.91841
Tb927.5.2200	hypothetical protein, conserved	0	2.79453	0.00740746	0.918091
Tb927.5.2230	hypothetical protein, conserved	0	2.79453	0.00740746	0.918091
Tb927.7.6370	hypothetical protein, conserved	0	3.33507	0.00255421	0.917316
Tb927.10.1600	hypothetical protein, conserved	0	3.36818	0.00190758	0.914883
Tb927.8.4650	hypothetical protein, conserved	0	3.0557	0.00530397	0.914658
Tb927.10.14640	hypothetical protein, conserved	0	5.25401	2.95734e-05	0.914418
Tb927.7.4440	hypothetical protein, conserved	0	3.04855	0.00259439	0.9136
Tb927.8.3210	hypothetical protein, conserved	0	5.2369	8.18558e-06	0.912982
Tb09.160.0440	hypothetical protein, conserved	0	3.89594	0.000453739	0.911063
Tb927.6.2270	hypothetical protein, conserved	0	3.46955	0.000185867	0.910755
Tb11.02.2230	hypothetical protein, conserved	0	3.83718	0.000139976	0.909355
Tb09.160.1690	hypothetical protein, conserved	0	4.3488	0.000275236	0.909182
Tb11.01.2770	hypothetical protein, conserved	0	2.97977	0.00878362	0.908351
Tb11.02.4940	hypothetical protein, conserved	0	3.02422	0.00273437	0.908135
Tb927.10.7590	hypothetical protein, conserved	0	4.5016	0.000258507	0.907665
Tb09.211.2810	hypothetical protein, conserved	0	3.01134	0.00287047	0.907346
Tb927.4.3580	hypothetical protein, conserved	0	4.40472	2.36142e-05	0.907134
Tb11.01.5530	hypothetical protein, conserved	0	3.34321	0.00142905	0.906579
Tb927.10.11000	hypothetical protein, conserved	0	4.66039	1.63431e-05	0.906385
Tb927.10.2150	hypothetical protein, conserved	0	3.0297	0.00581756	0.906209
Tb927.2.3920	hypothetical protein, conserved	0	3.10412	0.00729104	0.905836
Tb927.10.2320	hypothetical protein, conserved	0	2.75209	0.00662267	0.904014
Tb09.244.2770	hypothetical protein, conserved	0	3.37946	0.00729784	0.903615
Tb927.8.1520	hypothetical protein, conserved	0	5.97367	6.40595e-07	0.903175
Tb927.10.8650	hypothetical protein, conserved	0	2.68464	0.00593847	0.902631
Tb927.7.3060	hypothetical protein, conserved	0	3.18649	0.00167002	0.900913
Tb11.01.1250	hypothetical protein, conserved	0	2.92702	0.00237475	0.899583
Tb11.01.0620	hypothetical protein, conserved	0	3.81433	0.000302292	0.897267
Tb927.4.1130	hypothetical protein, conserved	0	5.0388	1.86027e-05	0.897074
Tb927.10.12390	hypothetical protein, conserved	0	2.67064	0.00648986	0.896422
Tb11.01.2660	hypothetical protein, conserved	0	2.73191	0.00696976	0.894413
Tb11.01.7005	hypothetical protein, conserved	0	3.60582	0.000592208	0.888539
Tb11.02.4180	hypothetical protein, conserved	0	2.70592	0.00575439	0.88768
Tb11.01.1330	hypothetical protein, conserved	0	4.06691	0.000116808	0.886772
Tb927.7.4200	hypothetical protein, conserved	0	3.36238	0.0020801	0.885911
Tb11.02.1770	hypothetical protein, conserved	0	5.10078	6.55713e-06	0.884715
Tb11.02.2270	hypothetical protein, conserved	0	6.36748	5.9766e-06	0.884121
Tb927.8.2290	hypothetical protein, conserved	0	5.23221	8.21081e-06	0.882141
Tb11.01.5760	hypothetical protein, conserved	0	3.71299	0.000133334	0.881673
Tb11.03.0660	hypothetical protein, conserved	0	2.85989	0.00317797	0.879008
Tb927.8.3120	hypothetical protein, conserved	0	5.11426	0.00327415	0.878816
Tb927.10.11890	hypothetical protein, conserved	0	3.18684	0.00187105	0.876909
Tb927.8.1120	hypothetical protein, conserved	0	4.63381	4.2931e-05	0.876294
Tb927.10.710	hypothetical protein, conserved	0	3.65881	0.000511344	0.875601
Tb927.7.1830	hypothetical protein, conserved	0	3.09046	0.00435154	0.873582
Tb927.7.5510	hypothetical protein, conserved	0	2.68829	0.00749945	0.869744
Tb927.1.4730	hypothetical protein, conserved	0	3.11835	0.00469421	0.86917
Tb927.8.6800	hypothetical protein, conserved	0	3.06529	0.00361041	0.864915
Tb927.4.2860	hypothetical protein, conserved	0	2.94872	0.00726394	0.86445
Tb927.10.8220	hypothetical protein, conserved	0	5.04958	2.91188e-05	0.862584
Tb927.2.1730	hypothetical protein, conserved	0	3.12002	0.00315145	0.861899
Tb927.10.7920	hypothetical protein, conserved	0	3.41438	0.0012209	0.859766
Tb927.3.4200	hypothetical protein, conserved	0	3.74339	0.000507207	0.858452
Tb927.4.2620	hypothetical protein, conserved	0	3.33001	0.00390467	0.858318
Tb927.10.13340	hypothetical protein, conserved	0	3.68059	0.0038475	0.85769
Tb927.4.1970	hypothetical protein, conserved	0	3.03099	0.00201184	0.857686
Tb11.47.0005	hypothetical protein, conserved	0	3.69992	0.000603333	0.856955
Tb927.2.2860	hypothetical protein, conserved	0	2.84631	0.0040704	0.856211
Tb11.02.3900	hypothetical protein, conserved	0	3.90268	0.000149115	0.853683
Tb09.211.4290	hypothetical protein, conserved	0	2.87463	0.00758736	0.85353
Tb927.2.5260	hypothetical protein, conserved	0	4.78247	0.000144698	0.853129
Tb927.3.1150	hypothetical protein, conserved	0	3.35073	0.00152189	0.852562
Tb927.10.9980	hypothetical protein, conserved	0	2.93249	0.00847999	0.850935
Tb11.02.0670	hypothetical protein, conserved	0	3.68682	0.000822711	0.850713
Tb927.10.14650	hypothetical protein, conserved	0	5.52909	1.09354e-06	0.850272
Tb927.5.2840	hypothetical protein, conserved	0	4.25739	0.00231562	0.84933
Tb927.3.3250	hypothetical protein, conserved	0	2.7978	0.00808661	0.845774
Tb927.5.780	hypothetical protein, conserved	0	3.75545	0.00021122	0.845595
Tb927.7.1870	hypothetical protein, conserved	0	3.13284	0.00409477	0.845008
Tb11.02.2190	hypothetical protein, conserved	0	3.85968	0.000283985	0.844873
Tb09.211.2860	hypothetical protein, conserved	0	2.86539	0.00529113	0.843413
Tb927.10.10430	hypothetical protein, conserved	0	4.15154	0.000167943	0.842334
Tb927.4.3540	hypothetical protein, conserved	0	3.05906	0.00655472	0.84069
Tb927.1.650	hypothetical protein, conserved	0	4.15289	0.000163519	0.835358
Tb927.8.5800	hypothetical protein, conserved	0	3.70644	0.00275764	0.835192
Tb927.3.650	hypothetical protein, conserved	0	3.62619	0.00276894	0.835018
Tb927.4.1470	hypothetical protein, conserved	0	3.68243	0.00096508	0.834953
Tb11.02.1190	hypothetical protein, conserved	0	2.49614	0.0096726	0.834395
Tb927.5.2180	hypothetical protein, conserved	0	3.4364	0.000451585	0.83355
Tb927.10.8640	hypothetical protein, conserved	0	7.64386	0.000256884	0.833424
Tb927.10.12970	hypothetical protein, conserved	0	3.6698	0.000870354	0.830207
Tb09.211.4520	hypothetical protein, conserved	0	5.48018	1.50984e-06	0.83001
Tb927.3.1930	hypothetical protein, conserved	0	3.32233	0.000762802	0.828172
Tb927.5.2210	hypothetical protein, conserved	0	3.41609	0.000462843	0.827425
Tb927.5.2240	hypothetical protein, conserved	0	3.41609	0.000462843	0.827425
Tb11.02.4060	hypothetical protein, conserved	0	3.51805	0.00630915	0.826074
Tb11.01.0300	hypothetical protein, conserved	0	5.60368	0.000216456	0.824934
Tb09.160.5040	hypothetical protein, conserved	0	3.63622	0.00487514	0.82451
Tb927.6.1130	hypothetical protein, conserved	0	2.79833	0.00634357	0.822236
Tb927.10.10780	hypothetical protein, conserved	0	2.8502	0.00626833	0.822019
Tb927.3.2910	hypothetical protein, conserved	0	4.24662	0.000290249	0.821167
Tb927.10.5130	hypothetical protein, conserved	0	3.64929	0.000319834	0.820122
Tb927.5.1670	hypothetical protein, conserved	0	5.19182	3.52966e-06	0.819872
Tb927.10.7970	hypothetical protein, conserved	0	3.25304	0.00777158	0.819193
Tb09.211.3990	hypothetical protein, conserved	0	3.22058	0.00320766	0.818593
Tb927.1.4220	hypothetical protein, conserved	0	3.09729	0.00469421	0.817901
Tb927.7.4740	hypothetical protein, conserved	0	3.74594	0.0004995	0.817303
Tb11.01.5580	hypothetical protein, conserved	0	3.63057	0.000506055	0.816913
Tb927.3.2390	hypothetical protein, conserved	0	3.14055	0.00236027	0.816651
Tb927.6.4330	hypothetical protein, conserved	0	3.80526	0.00138791	0.813407
Tb927.7.620	hypothetical protein, conserved	0	3.29468	0.00141763	0.813307
Tb927.10.15510	hypothetical protein, conserved	0	3.72375	0.000670238	0.811755
Tb927.1.1210	hypothetical protein, conserved	0	5.29999	5.24853e-05	0.811182
Tb927.10.4060	hypothetical protein, conserved	0	2.94664	0.00589015	0.80918
Tb927.2.1720	hypothetical protein, conserved	0	2.65371	0.00683262	0.808425
Tb11.01.1700	hypothetical protein, conserved	0	4.10341	0.000175772	0.806953
Tb927.3.5320	hypothetical protein, conserved	0	2.80657	0.00334361	0.805101
Tb09.211.2680	hypothetical protein, conserved	0	3.61116	0.00275536	0.801777
Tb11.02.4020	hypothetical protein, conserved	0	5.55902	2.4234e-06	0.801379
Tb927.3.3120	hypothetical protein, conserved	0	4.27738	2.69534e-05	0.800829
Tb927.6.2620	hypothetical protein, conserved	0	3.12781	0.00327837	0.799606
Tb927.4.1830	hypothetical protein, conserved	0	5.09349	7.43222e-06	0.798507
Tb927.10.8100	hypothetical protein, conserved	0	3.61316	0.000246512	0.798357
Tb09.211.0775	hypothetical protein, conserved	0	2.77845	0.00385358	0.796334
Tb11.01.0500	hypothetical protein, conserved	0	3.88526	0.000189959	0.795219
Tb927.8.6050	hypothetical protein, conserved	0	5.43641	4.03872e-06	0.794198
Tb927.5.1860	hypothetical protein, conserved	0	2.89397	0.00299964	0.791117
Tb11.02.0510	hypothetical protein, conserved	0	3.76519	0.000159597	0.790854
Tb927.10.7370	hypothetical protein, conserved	0	3.34617	0.00117677	0.790667
Tb927.10.13920	hypothetical protein, conserved	0	4.55326	0.00011091	0.790284
Tb927.3.2130	hypothetical protein, conserved	0	2.76262	0.00856533	0.789798
Tb927.10.9590	hypothetical protein, conserved	0	3.78406	0.000702633	0.789218
Tb927.7.2260	hypothetical protein, conserved	0	4.5502	1.8182e-05	0.787789
Tb09.211.0520	hypothetical protein, conserved	0	2.60053	0.00932356	0.785991
Tb927.3.660	hypothetical protein, conserved	0	4.30116	0.00010686	0.785723
Tb09.160.5150	hypothetical protein, conserved	0	4.22604	0.000124202	0.784627
Tb927.5.990	hypothetical protein, conserved	0	5.68389	5.85852e-06	0.783778
Tb927.5.2130	hypothetical protein, conserved	0	3.03304	0.00655926	0.783601
Tb11.02.5105	hypothetical protein, conserved	0	2.86517	0.00623291	0.782478
Tb09.160.1570	hypothetical protein, conserved	0	4.81115	0.000119476	0.78207
Tb927.10.1290	hypothetical protein, conserved	0	4.40677	0.00113756	0.781427
Tb11.01.8000	hypothetical protein, conserved	0	3.61566	0.00111299	0.779954
Tb11.03.0710	hypothetical protein, conserved	0	3.48237	0.00156737	0.779691
Tb927.10.7720	hypothetical protein, conserved	0	3.71344	0.0081173	0.779572
Tb927.4.3600	hypothetical protein, conserved	0	4.77266	5.1268e-05	0.778098
Tb927.3.2370	hypothetical protein, conserved	0	3.26548	0.00185538	0.77658
Tb927.8.1470	hypothetical protein, conserved	0	4.2497	0.000127523	0.776119
Tb927.10.7320	hypothetical protein, conserved	0	3.7535	0.00102429	0.775146
Tb927.10.9260	hypothetical protein, conserved	0	4.76333	0.000463337	0.774752
Tb927.3.4740	hypothetical protein, conserved	0	5.51987	0.00310816	0.77293
Tb927.3.4780	hypothetical protein, conserved	0	5.51987	0.00310816	0.77293
Tb11.02.1150	hypothetical protein, conserved	0	2.70081	0.00823609	0.772798
Tb09.211.3150	hypothetical protein, conserved	0	3.51776	0.00215315	0.771047
Tb09.211.4320	hypothetical protein, conserved	0	3.83677	0.00468195	0.770154
Tb09.211.0370	hypothetical protein, conserved	0	4.05148	0.000282802	0.770094
Tb927.10.9790	hypothetical protein, conserved	0	2.89378	0.0093821	0.769264
Tb927.7.1290	hypothetical protein, conserved	0	3.86712	9.19495e-05	0.767983
Tb11.01.5170	hypothetical protein, conserved	0	3.6494	0.00142905	0.763621
Tb11.01.0660	hypothetical protein, conserved	0	2.89971	0.00837947	0.763446
Tb09.211.1810	hypothetical protein, conserved	0	3.67563	0.000487209	0.763408
Tb927.2.4750	hypothetical protein, conserved	0	4.33542	3.51411e-05	0.762988
Tb11.02.4330	hypothetical protein, conserved	0	6.60962	3.2712e-07	0.761567
Tb927.7.4800	hypothetical protein, conserved	0	4.64319	0.000865787	0.758601
Tb11.01.5080	hypothetical protein, conserved	0	4.50777	0.000106679	0.758198
Tb927.6.3940	hypothetical protein, conserved	0	2.80557	0.00295291	0.757751
Tb11.02.2530	hypothetical protein, conserved	0	3.41533	0.00161939	0.756874
Tb11.01.8226	hypothetical protein, conserved	0	3.85317	0.00146919	0.751205
Tb927.10.4760	hypothetical protein, conserved	0	3.13609	0.000969216	0.751004
Tb927.2.4900	hypothetical protein, conserved	0	4.26684	4.35647e-05	0.749738
Tb927.10.16050	hypothetical protein, conserved	0	3.937	0.000257461	0.749284
Tb927.8.1580	hypothetical protein, conserved	0	3.40851	0.00168126	0.748237
Tb11.01.0135	hypothetical protein, conserved	0	4.45216	0.000401905	0.748125
Tb927.8.2010	hypothetical protein, conserved	0	3.19835	0.00808661	0.748068
Tb927.6.4490	hypothetical protein, conserved	0	2.95661	0.00540218	0.744462
Tb927.6.2560	hypothetical protein, conserved	0	2.82329	0.00292969	0.743947
Tb927.3.5000	hypothetical protein, conserved	0	4.32588	0.000106495	0.743723
Tb11.01.0830	hypothetical protein, conserved	0	5.11864	3.26535e-06	0.743029
Tb927.4.3730	hypothetical protein, conserved	0	3.35853	0.00171909	0.742921
Tb927.4.970	hypothetical protein, conserved	0	6.00944	2.39161e-06	0.742018
Tb927.2.2990	hypothetical protein, conserved	0	3.86696	0.000180574	0.741324
Tb09.160.5660	hypothetical protein, conserved	0	7.84664	7.71345e-06	0.741141
Tb927.5.2670	hypothetical protein, conserved	0	4.79674	8.30134e-05	0.740428
Tb927.6.1170	hypothetical protein, conserved	0	4.36186	2.47416e-05	0.736113
Tb927.10.2050	hypothetical protein, conserved	0	4.07717	0.000111276	0.735061
Tb11.55.0015	hypothetical protein, conserved	0	2.88941	0.0075995	0.734701
Tb927.7.3770	hypothetical protein, conserved	0	5.40522	4.10127e-05	0.732264
Tb927.10.6550	hypothetical protein, conserved	0	4.6411	3.34938e-05	0.729465
Tb927.5.4160	hypothetical protein, conserved	0	4.47694	9.64635e-05	0.72312
Tb927.10.11030	hypothetical protein, conserved	0	3.80286	0.00236274	0.72187
Tb09.160.3370	hypothetical protein, conserved	0	4.7183	0.000115519	0.720036
Tb927.10.4240	hypothetical protein, conserved	0	3.16338	0.00188327	0.717665
Tb927.3.3890	hypothetical protein, conserved	0	3.05714	0.00369116	0.712483
Tb11.01.4510	hypothetical protein, conserved	0	3.10643	0.00271772	0.708168
Tb927.2.2500	hypothetical protein, conserved	0	4.67099	0.000665229	0.706379
Tb11.02.0420	hypothetical protein, conserved	0	6.64329	9.54137e-07	0.703201
Tb927.10.2820	hypothetical protein, conserved	0	4.23759	0.000149103	0.700373
Tb11.02.0600	hypothetical protein, conserved	0	3.82401	0.000711718	0.698725
Tb927.10.6340	hypothetical protein, conserved	0	3.29909	0.00291522	0.69761
Tb927.6.4260	hypothetical protein, conserved	0	2.86108	0.00295508	0.694666
Tb927.3.710	hypothetical protein, conserved	0	5.04586	7.27646e-06	0.693415
Tb11.01.6020	hypothetical protein, conserved	0	3.05728	0.00441386	0.692261
Tb11.02.2500	hypothetical protein, conserved	0	4.02624	0.000402469	0.69059
Tb09.211.2670	hypothetical protein, conserved	0	3.53322	0.000806114	0.689789
Tb11.02.5230	hypothetical protein, conserved	0	3.22721	0.0036927	0.689701
Tb927.5.510	hypothetical protein, conserved	0	3.80931	0.00106994	0.688293
Tb927.10.13990	hypothetical protein, conserved	0	4.50186	0.000129741	0.687365
Tb11.01.2010	hypothetical protein, conserved	0	3.51176	0.000781079	0.687106
Tb927.8.2300	hypothetical protein, conserved	0	3.67263	0.00148414	0.686405
Tb09.244.2640	hypothetical protein, conserved	0	3.43677	0.000864069	0.685375
Tb927.1.3400	hypothetical protein, conserved	0	2.85716	0.0038706	0.685215
Tb927.10.10710	hypothetical protein, conserved	0	5.66093	4.60023e-06	0.684073
Tb927.6.610	hypothetical protein, conserved	0	2.77163	0.00609105	0.681918
Tb927.3.2990	hypothetical protein, conserved	0	5.53894	3.14291e-06	0.679504
Tb11.03.0430	hypothetical protein, conserved	0	3.45682	0.0017475	0.674841
Tb927.1.4160	hypothetical protein, conserved	0	4.94131	0.00345991	0.672367
Tb927.3.1220	hypothetical protein, conserved	0	3.1621	0.0017345	0.671844
Tb927.7.4010	hypothetical protein, conserved	0	5.58383	0.000725946	0.669019
Tb927.10.15230	hypothetical protein, conserved	0	3.17661	0.00594571	0.668775
Tb927.10.12020	hypothetical protein, conserved	0	3.3039	0.00103678	0.668434
Tb927.10.11560	hypothetical protein, conserved	0	3.65982	0.00442856	0.667682
Tb927.10.4850	hypothetical protein, conserved	0	4.41017	4.93309e-05	0.667048
Tb11.03.0510	hypothetical protein, conserved	0	3.52767	0.00142905	0.666145
Tb927.8.6820	hypothetical protein, conserved	0	4.35464	3.68788e-05	0.663662
Tb09.160.2350	hypothetical protein, conserved	0	6.09117	1.99419e-05	0.663193
Tb927.8.1750	hypothetical protein, conserved	0	7.80098	3.71299e-07	0.651464
Tb11.01.5740	hypothetical protein, conserved	0	5.29854	3.87637e-05	0.650488
Tb927.3.3620	hypothetical protein, conserved	0	4.96844	0.000318986	0.650263
Tb927.10.1610	hypothetical protein, conserved	0	3.22979	0.00440926	0.647556
Tb927.4.3100	hypothetical protein, conserved	0	3.46206	0.000700146	0.645308
Tb927.7.3140	hypothetical protein, conserved	0	3.21224	0.0022113	0.644916
Tb927.4.1030	hypothetical protein, conserved	0	4.3535	0.000592208	0.639652
Tb927.4.3360	hypothetical protein, conserved	0	4.87228	0.00986894	0.633495
Tb927.5.920	hypothetical protein, conserved	0	5.28024	7.55429e-06	0.625046
Tb927.7.4870	hypothetical protein, conserved	0	7.39245	7.77344e-06	0.62217
Tb927.3.5300	hypothetical protein, conserved	0	4.07512	0.00127271	0.616046
Tb927.3.2970	hypothetical protein, conserved	0	3.73888	0.00188327	0.61361
Tb927.6.4570	hypothetical protein, conserved	0	3.46056	0.00335625	0.610989
Tb927.7.3800	hypothetical protein, conserved	0	4.08148	0.00249717	0.606549
Tb927.10.13140	hypothetical protein, conserved	0	4.73092	0.00024303	0.598143
Tb927.3.810	hypothetical protein, conserved	0	3.30828	0.00401596	0.589748
Tb11.02.0610	hypothetical protein, conserved	0	3.01835	0.00593373	0.582298
Tb11.01.7340	hypothetical protein, conserved	0	3.69989	0.0084989	0.581404
Tb927.3.4150	hypothetical protein, conserved	0	3.33936	0.00329203	0.580017
Tb927.8.5130	hypothetical protein, conserved	0	3.98116	0.000547973	0.57956
Tb927.3.5560	hypothetical protein, conserved	0	6.04239	5.64509e-07	0.576207
Tb927.5.3720	hypothetical protein, conserved	0	6.30467	2.96257e-05	0.573364
Tb927.4.3780	hypothetical protein, conserved	0	6.11393	1.99961e-06	0.573011
Tb09.211.4820	hypothetical protein, conserved	0	4.7437	2.93001e-05	0.572023
Tb927.4.510	hypothetical protein, conserved	0	3.70319	0.00321673	0.571488
Tb927.10.13910	hypothetical protein, conserved	0	3.80634	0.00368263	0.559972
Tb927.5.750	hypothetical protein, conserved	0	4.91148	0.000641457	0.55703
Tb927.10.13810	hypothetical protein, conserved	0	5.36855	1.87523e-05	0.537697
Tb11.01.4150	hypothetical protein, conserved	0	8.56793	3.82779e-07	0.531547
Tb927.10.1410	hypothetical protein, conserved	0	3.36108	0.00164278	0.526534
Tb927.4.990	hypothetical protein, conserved	0	3.97923	0.00531614	0.521218
Tb11.01.1620	hypothetical protein, conserved	0	4.33157	0.00161939	0.516266
Tb11.01.1890	hypothetical protein, conserved	0	4.86958	2.89544e-05	0.514731
Tb927.10.9730	hypothetical protein, conserved	0	2.56024	0.00838969	0.507554
Tb927.8.5070	hypothetical protein, conserved	0	3.68934	0.000478729	0.499294
Tb927.5.1260	hypothetical protein, conserved	0	3.04582	0.00674241	0.452735
Tb927.8.4850	hypothetical protein, conserved	0	7.22143	6.7372e-05	0.44129
Tb927.10.9030	hypothetical protein, conserved	0	4.95049	0.00127252	0.441119
Tb927.8.2170	hypothetical protein, conserved	0	6.19354	1.86313e-05	0.43574
Tb11.02.5165	hypothetical protein, conserved	0	6.61425	9.51401e-05	0.43032
Tb11.18.0018	hypothetical protein, conserved	0	9.72913	4.02838e-05	0.379181
Tb11.02.5490	hypothetical protein, conserved	0	2.63518	0.00945024	0.362249
Tb11.02.3770	hypothetical protein, conserved	0	4.25792	2.40628e-05	0.329749
Tb11.02.5480	hypothetical protein, conserved	0	2.70028	0.0059689	0.317951
Tb11.02.3760	hypothetical protein, conserved	0	4.15882	3.64199e-05	0.281336
Tb927.1.4500	hypothetical protein, conserved	0	3.03234	0.0050206	0.266328
Tb09.160.0465	hypothetical protein, conserved	0	4.68161	8.75815e-06	0.253482
Tb09.160.3530	hypothetical protein, conserved	0	3.65991	0.00474926	0.241156
Tb927.3.700	hypothetical protein, conserved	0	4.40716	0.0038475	0.156506
Tb927.10.2620	hypothetical protein, conserved	chaperone	2.90514	0.00349701	0.876871
Tb927.3.4810	hypothetical protein, conserved	DNA synthesis, modification, repair	3.57702	0.000812372	1.10639
Tb927.4.4680	hypothetical protein, conserved	DNA synthesis, modification, repair	5.50575	2.09614e-05	0.964275
Tb927.10.4700	hypothetical protein, conserved	Glycan synthesis & metabolism	4.53993	3.83005e-05	0.854176
Tb11.02.5140	hypothetical protein, conserved	Lipids & fatty acids	3.20394	0.00333007	1.34924
Tb927.10.10800	hypothetical protein, conserved	Lipids & fatty acids	3.39201	0.00303709	0.772216
Tb927.10.12450	hypothetical protein, conserved	Lysosome	5.25526	3.97628e-06	0.828492
Tb11.03.0475	hypothetical protein, conserved	Mitochondrial biogenesis	3.72376	0.000385482	0.774147
Tb11.01.1690	hypothetical protein, conserved	Mitochondrial electron transport	3.56993	0.000765254	0.98721
Tb11.01.1900	hypothetical protein, conserved	Mitochondrial electron transport	3.61781	0.000488667	0.867807
Tb927.10.4280	hypothetical protein, conserved	Mitochondrial electron transport	4.76729	0.00528313	0.482629
Tb11.01.7090	hypothetical protein, conserved	Mitochondrial pathway	5.19537	3.15649e-06	1.52333
Tb927.8.580	hypothetical protein, conserved	Mitochondrial pathway	2.95016	0.00547953	1.01261
Tb927.10.1160	hypothetical protein, conserved	Mitochondrial pathway	4.75637	3.43159e-05	0.957179
Tb927.4.3450	hypothetical protein, conserved	Mitochondrial pathway	2.83549	0.00609193	0.950256
Tb927.3.3660	hypothetical protein, conserved	Mitochondrial pathway	3.14349	0.00252823	0.913114
Tb927.2.2940	hypothetical protein, conserved	Mitochondrial pathway	6.36034	3.64896e-06	0.856622
Tb927.8.2530	hypothetical protein, conserved	Mitochondrial pathway	4.04653	0.000484938	0.843464
Tb927.7.840	hypothetical protein, conserved	Mitochondrial pathway	4.18282	0.000580972	0.819442
Tb927.3.2880	hypothetical protein, conserved	Mitochondrial pathway	4.41358	0.00273819	0.814185
Tb11.01.5480	hypothetical protein, conserved	Mitochondrial pathway	3.4135	0.00139275	0.800797
Tb927.8.4250	hypothetical protein, conserved	Mitochondrial pathway	3.91001	0.000153384	0.781835
Tb927.4.720	hypothetical protein, conserved	Mitochondrial pathway	3.07308	0.00829092	0.772748
Tb927.10.3040	hypothetical protein, conserved	Mitochondrial pathway	4.20011	8.54575e-05	0.729235
Tb927.6.590	hypothetical protein, conserved	Mitochondrial pathway	3.25143	0.00187435	0.644577
Tb11.01.3860	hypothetical protein, conserved	Mitochondrial pathway	3.9068	0.000411188	0.522929
Tb927.2.2570	hypothetical protein, conserved	Mitochondrial RNA	3.19623	0.00234094	1.30192
Tb927.2.6070	hypothetical protein, conserved	Mitochondrial RNA	4.00264	0.000158015	0.806997
Tb11.01.8620	hypothetical protein, conserved	Mitochondrial RNA	3.0551	0.00193905	0.795259
Tb927.7.3240	hypothetical protein, conserved	Mitochondrial translation	3.43458	0.000885568	1.40338
Tb11.01.1810	hypothetical protein, conserved	Mitochondrial translation	5.27921	1.54608e-05	1.14906
Tb927.10.7380	hypothetical protein, conserved	Mitochondrial translation	3.56367	0.000481346	1.14615
Tb927.10.1870	hypothetical protein, conserved	Mitochondrial translation	4.38606	0.000123887	1.04031
Tb927.3.770	hypothetical protein, conserved	Mitochondrial translation	3.08835	0.0028133	1.0113
Tb11.01.1840	hypothetical protein, conserved	Mitochondrial translation	3.5897	0.000489887	0.909756
Tb927.3.970	hypothetical protein, conserved	Mitochondrial translation	2.83509	0.00470877	0.899751
Tb927.10.11050	hypothetical protein, conserved	Mitochondrial translation	3.16708	0.00262388	0.863342
Tb11.01.1930	hypothetical protein, conserved	Mitochondrial translation	2.9725	0.00281536	0.858055
Tb927.5.3410	hypothetical protein, conserved	Mitochondrial translation	4.8812	0.000141065	0.850441
Tb11.01.7140	hypothetical protein, conserved	Mitochondrial translation	3.51826	0.00190325	0.816536
Tb927.7.4710	hypothetical protein, conserved	Mitochondrial translation	3.25006	0.00222968	0.799642
Tb11.02.5670	hypothetical protein, conserved	Mitochondrial translation	3.26198	0.00120891	0.791951
Tb927.8.3110	hypothetical protein, conserved	Mitochondrial translation	2.84165	0.00320116	0.782388
Tb927.5.1790	hypothetical protein, conserved	Mitochondrial translation	3.72914	0.00010081	0.781922
Tb927.6.4080	hypothetical protein, conserved	Mitochondrial translation	2.79077	0.00900865	0.747037
Tb927.4.4600	hypothetical protein, conserved	Mitochondrial translation	3.20621	0.00389778	0.704623
Tb927.4.4610	hypothetical protein, conserved	Mitochondrial translation	3.13219	0.00438358	0.704252
Tb927.8.5280	hypothetical protein, conserved	Mitochondrial translation	2.6482	0.00576761	0.648457
Tb927.7.6800	hypothetical protein, conserved	Mitochondrial translation	5.6285	2.51854e-06	0.602301
Tb11.01.1990	hypothetical protein, conserved	RNA synthesis	4.56466	3.36232e-05	0.877791
Tb11.01.7730	hypothetical protein, conserved	RNA synthesis II	3.24474	0.00101544	0.925548
Tb927.10.5210	hypothetical protein, conserved	RNA synthesis II	4.05462	0.000575549	0.747618
Tb927.10.13650	hypothetical protein, conserved	vesicular transport	6.71517	3.75933e-06	0.71508
Tb927.10.6650	hypothetical protein, conserved ,G10 protein homologue, putative	0	3.59513	0.00540707	0.943495
Tb11.02.5260	hypothetical protein, conserved ,predicted zinc finger protein	Lipids & fatty acids	3.84999	0.000244836	0.871716
Tb927.10.7400	hypothetical protein, conserved ,predicted zinc finger protein	Zinc finger	3.43942	0.00127782	1.15623
Tb09.211.1655	hypothetical protein, conserved ,predicted zinc finger protein	#N/A	3.68471	0.00276838	1.30279
Tb927.10.5750	hypothetical protein, conserved ,protocatechuate 4,5-dioxygenase-like protein	Enzyme	3.16887	0.00251141	0.8098
Tb927.10.6380	hypothetical protein, conserved ,ring finger containing protein	Zinc finger	5.02372	2.7349e-05	0.617833
Tb927.8.3860	hypothetical protein, conserved ,WD-repeat containing protein	0	3.94473	9.69832e-05	0.787033
Tb927.10.12330	hypothetical protein, conserved ,zinc finger protein family member, putative	RNA binding	2.92612	0.00388395	1.12432
Tb927.6.4290	hypothetical protein, conserved (pseudogene)	pseudogene	5.24173	1.31129e-06	1.0313
Tb927.10.13940	hypothetical protein, unlikely	unlikely	14.5031	5.55442e-11	10.3381
Tb09.160.1630	hypothetical protein, unlikely	unlikely	11.4607	6.00661e-11	7.47441
Tb09.160.1620	hypothetical protein, unlikely	unlikely	11.4914	6.17489e-12	4.16972
Tb09.244.2690	hypothetical protein, unlikely	unlikely	6.1869	3.97847e-06	1.35941
Tb09.160.1040	hypothetical protein, unlikely	unlikely	6.25489	2.63349e-05	1.29764
Tb09.211.0780	hypothetical protein, unlikely	unlikely	3.70153	0.00121624	1.17619
Tb09.160.1270	hypothetical protein, unlikely	unlikely	5.03877	0.000447307	1.09641
Tb927.1.2810	hypothetical protein, unlikely	unlikely	5.16592	0.00013423	1.07069
Tb927.1.2840	hypothetical protein, unlikely	unlikely	5.16592	0.00013423	1.07069
Tb927.1.2870	hypothetical protein, unlikely	unlikely	5.16592	0.00013423	1.07069
Tb927.10.1360	hypothetical protein, unlikely	unlikely	4.45192	0.00024076	0.997204
Tb927.10.11490	hypothetical protein, unlikely	unlikely	4.13005	0.00593301	0.990583
Tb09.160.2500	hypothetical protein, unlikely	unlikely	3.95871	0.000662055	0.933632
Tb09.160.2560	hypothetical protein, unlikely	unlikely	3.95871	0.000662055	0.933632
Tb09.160.1050	hypothetical protein, unlikely	unlikely	3.74053	0.0036927	0.815797
Tb09.v1.0270	hypothetical protein, unlikely	unlikely	4.36356	0.000262241	0.788198
Tb927.1.2440	hypothetical protein, unlikely	unlikely	4.98186	1.55425e-06	0.66093
Tb927.1.2500	hypothetical protein, unlikely	unlikely	4.98186	1.55425e-06	0.66093
Tb927.1.2540	hypothetical protein, unlikely	unlikely	4.98186	1.55425e-06	0.66093
Tb927.1.2480	hypothetical protein, unlikely	unlikely	5.41833	6.29216e-07	0.596607
Tb927.1.2560	hypothetical protein, unlikely	unlikely	5.41833	6.29216e-07	0.596607
Tb927.1.2520	hypothetical protein, unlikely	unlikely	5.08036	1.31166e-06	0.596492
Tb927.1.2460	hypothetical protein, unlikely	unlikely	5.08284	1.31166e-06	0.585624
Tb09.160.2080	hypothetical protein, unlikely	unlikely	4.60544	0.0024485	0.566203
Tb09.211.0360	hypothetical protein, unlikely	unlikely	5.26047	0.000241869	0.510728
Tb09.211.4530	hypothetical protein, unlikely	unlikely	13.6649	1.43566e-11	0.476193
Tb09.160.1480	hypothetical protein, unlikely	unlikely	3.11255	0.00722677	0.299295
Tb927.8.7170	inositol polyphosphate 1-phosphatase, putative	Mitochondrial pathway	3.10807	0.00193416	1.12962
Tb927.8.7260	kinetoplast-associated protein, putative	Mitochondrial DNA	2.65286	0.00413823	0.889926
Tb927.2.4870	kinetoplastid-specific dual specificity phosphatase, putative	Phosphatase	2.99984	0.00505469	0.856952
Tb927.6.1230	kinetoplastid-specific phospho-protein phosphatase	Protein phosphatase	2.97265	0.00402697	0.712127
Tb09.v1.0350	lipid-like atypical dual specificity phosphatase, putative	Lipids & fatty acids	2.87211	0.0070684	0.873087
Tb11.01.1160	lipoate-protein ligase, putative ,lipoyltransferase, putative	Mitochondrial pathway	3.34688	0.00297475	0.667375
Tb09.160.2100	low molecular weight protein tyrosine phosphatase, putative	Protein phosphatase	5.1607	0.00224871	0.603792
Tb09.160.0840	membrane protein YIP1, putative	Vesicular transport	3.98057	0.000281818	0.924391
Tb927.10.2440	metacaspase MCA4 ,cysteine peptidase, Clan CD, family C13, putative	Protease or peptidase	4.28235	1.69934e-05	1.90615
Tb927.10.7940	methyltransferase, putative	Enzyme	3.79787	0.000340367	0.88007
Tb927.10.10410	minichromosome maintenance (MCM) complex subunit, putative ,minichromosome maintenance protein-like protein	DNA synthesis, modification, repair	2.99625	0.00280867	0.991081
Tb11.02.2960	mitochondrial carrier protein, putative	Mitochondrial pathway	3.95009	0.000132687	0.565035
Tb927.8.4440	mitochondrial carrier protein, putative	Mitochondrial pathway	5.88503	1.21283e-05	0.553562
Tb927.8.5810	mitochondrial carrier protein, putative ,mitochondrial carnitine/acylcarnitine carrier protein	Mitochondrial pathway	3.14894	0.00204305	0.734092
Tb927.10.4590	mitochondrial inner membrane signal peptidase, putative ,serine peptidase clan SF, family S26B, putative	Mitochondrial biogenesis	3.21866	0.0080257	0.729398
Tb11.55.0009	mitochondrial RNA binding protein 1 ,gBP21, MRP1	Mitochondrial RNA	3.46529	0.000360247	1.01253
Tb927.10.10420	monothiol glutaredoxin, putative	Redox pathways	4.20348	0.000143307	1.13228
Tb927.10.4500	mRNA capping methyltransferase, putative	RNA processing	2.90225	0.0022756	0.910841
Tb11.01.8630	NADH dehydrogenase subunit NI8M, putative	Mitochondrial electron transport	3.52915	0.000409663	0.870812
Tb927.7.6350	NADH-ubiquinone oxidoreductase, mitochondrial, putative	Mitochondrial electron transport	2.66028	0.00772106	0.782085
Tb927.6.2040	nitrate reductase, putative	Enzyme	4.08801	0.000308261	1.01613
Tb09.160.0770	nitrilase, putative	Amino acid metabolism	3.80632	0.00106206	0.368398
Tb927.6.1970	nuclear cap binding protein, putative	Nucleo-cytoplasmic transport	4.85702	8.83396e-05	0.777838
Tb927.3.3540	Nucleoporin	Nucleo-cytoplasmic transport	4.30812	2.21756e-05	0.769735
Tb11.02.2120	nucleoporin 48	Nucleo-cytoplasmic transport	3.67158	0.00120526	0.911717
Tb927.10.4680	NUDIX hydrolase, conserved ,predicted MutT/NUDIX family protein	Enzyme	6.26598	1.76923e-06	1.02834
Tb11.01.1320	oxidoreductase, putative	Enzyme	3.02492	0.00152771	0.888908
Tb927.3.4990	oxidoreductase, putative	Enzyme	4.21078	0.000101768	0.788317
Tb927.8.7510	p-nitrophenylphosphatase, putative	Enzyme	3.07037	0.00334277	1.06507
Tb927.3.3770	paraflagellar rod component, putative	Cytoskeleton	3.50333	0.000310042	1.10191
Tb927.10.4620	peptidyl-prolyl cis-trans isomerase, putative	Chaperone	4.99228	8.709e-06	1.15925
Tb927.10.16100	peptidylprolyl isomerase-like protein, putative	Chaperone	3.34075	0.000524423	0.967334
Tb927.3.3610	peroxisomal targeting signal type 2 receptor, putative ,peroxin 7	Glycosome biogenesis	4.39592	4.09796e-05	1.30478
Tb927.6.1820	phosphatidic acid phosphatase, putative	Glycan synthesis & metabolism	3.31193	0.000535367	1.34005
Tb927.10.13930	phosphatidic acid phosphatase, putative	Lipids & fatty acids	3.61451	0.000756071	1.41773
Tb09.211.1610	phosphatidylserine decarboxylase, putative	Lipids & fatty acids	3.36458	0.00104246	1.33857
Tb927.3.3160	poly(A) polymerase ,polynucleotide adenylyltransferase	RNA processing	3.59464	0.000501295	0.345605
Tb11.01.4520	prefoldin subunit 2, putative	Chaperone	2.68512	0.00915772	0.927007
Tb09.211.1250	proteasome alpha 1 subunit, putative ,20S proteasome subunit alpha-6, (putative)	Ubiquitin & proteasome	2.71417	0.00441966	0.96563
Tb927.10.230	proteasome alpha 5 subunit, putative ,20S proteasome subunit alpha 5	Ubiquitin & proteasome	2.79065	0.0035938	1.74829
Tb927.3.780	proteasome alpha 7 subunit	Ubiquitin & proteasome	3.04208	0.00220901	1.06629
Tb927.10.16160	protein kinase, putative	Protein kinase	5.60147	3.6939e-06	1.03819
Tb11.03.0290	protein kinase, putative	Protein kinase	3.05651	0.00268181	0.673188
Tb927.3.3290	protein kinase, putative	Protein kinase	3.83244	0.000389602	0.634397
Tb11.01.3770	protein phosphatase 2A, putative	Protein phosphatase	3.33858	0.000831976	1.52934
Tb927.4.3680	protein phosphatase 2C, putative	Protein phosphatase	3.4823	0.000800174	0.931501
Tb11.01.0420	protein transport protein Sec13, putative	Vesicular transport	6.34769	0.00121423	0.721867
Tb927.10.7850	protein-L-isoaspartate, putative	Enzyme	4.49733	5.37136e-05	0.796882
Tb09.160.2000	pseudouridylate synthase, putative	rRNA-tRNA processing	3.50179	0.000545165	1.03491
Tb927.1.2820	pteridine transporter, putative	Folate	2.69205	0.00548101	0.664521
Tb927.1.2880	pteridine transporter, putative	Folate	2.70444	0.00519012	0.644681
Tb927.1.2850	pteridine transporter, putative	Folate	2.7694	0.00449715	0.639839
Tb927.10.6240	ras-like small GTPase, putative	Cell cycle	3.79024	0.000305427	0.692486
Tb927.6.2330	RGG protein ,hypothetical protein, conserved	RNA processing	3.46955	0.000185867	0.910755
Tb927.8.1810	rhomboid-like protein ,serine peptidase, Clan S-, family S54, putative	Protease or peptidase	3.95913	0.000144698	1.32311
Tb927.2.4890	ribosomal protein L11, putative	Mitochondrial translation	4.05012	8.54575e-05	0.580378
Tb927.2.4740	ribosomal protein L11, putative	Ribosome	4.05012	8.54575e-05	0.580378
Tb927.6.5040	ribosomal protein L15, putative	Ribosome	3.45438	0.000270862	1
Tb09.244.2720	ribosomal protein L15, putative	Ribosome	2.67428	0.00392389	1
Tb11.50.0005	ribosomal protein L21E (60S), putative	Ribosome	3.21217	0.000549908	1
Tb927.4.1100	ribosomal protein L21E (60S), putative	Ribosome	2.63506	0.00516909	1
Tb09.244.2725	ribosomal protein L36, putative	Ribosome	5.54481	6.14539e-06	1.33635
Tb927.10.1590	ribosomal protein L36, putative	Ribosome	10.0469	5.37346e-10	1
Tb927.4.5170	ribosomal protein L7/L12, putative	Ribosome	5.065	0.000249572	0.943743
Tb927.10.2840	ribosomal protein S25, putative	Ribosome	3.91656	6.2135e-05	0.961698
Tb11.01.0355	ribosomal protein S26, putative	Ribosome	4.41511	2.70195e-05	1
Tb927.8.2500	ribosomal RNA methyltransferase, putative	rRNA-tRNA processing	6.07025	2.07182e-06	0.810205
Tb927.6.670	ribosomal RNA processing protein 45 ,exosome complex exonuclease	RNA degradation	9.60358	1.84519e-09	1.11324
Tb927.10.15150	RNA polymerase III C11 subunit, putative ,DNA-directed RNA polymerase III, putative ,RNA polymerase subunit, putative	RNA synthesis III	2.8897	0.00652861	1.00048
Tb927.7.1170	RNA-binding protein, putative	Nucleo-cytoplasmic transport	3.97034	0.0002029	1.52166
Tb927.10.13570	RNA-binding protein, putative	RNA binding	3.87463	0.000143953	1.19489
Tb11.02.0840	RNA-binding protein, putative	RNA binding	4.3873	9.67473e-05	1.10894
Tb11.01.7000	RNA-binding protein, putative	RNA binding	2.94897	0.00720965	0.916024
Tb927.5.1750	RNA-binding protein, putative	RNA binding	4.00045	0.000139773	0.687061
Tb927.7.1180	RNA-binding protein, putative	RNA binding	6.78886	7.88018e-07	0.650901
Tb927.10.7470	RNA-binding protein, putative	RNA processing	2.9995	0.00659729	0.773712
Tb927.10.14080	RNA-binding protein, putative ,RBP27	RNA binding	3.9351	0.00012355	1.18099
Tb927.4.4170	rRNA methyltransferase, putative	rRNA-tRNA processing	3.35576	0.00904395	1.13029
Tb09.211.3850	selenocysteine lyase	Amino acid metabolism	2.74722	0.00504632	0.847118
Tb927.10.8700	selenoprotein, putative	0	6.18294	0.00023241	0.998844
Tb11.01.1780	short-chain dehydrogenase, putative	Enzyme	3.17802	0.00147543	0.961049
Tb927.10.12240	short-chain dehydrogenase, putative	Enzyme	4.0371	8.16203e-05	0.767111
Tb927.10.4040	short-chain dehydrogenase, putative	Lipids & fatty acids	4.64207	9.97553e-06	0.880114
Tb927.8.4610	small GTP-binding protein Rab1	Vesicular transport	3.67915	0.000229954	0.912871
Tb927.10.1520	small GTPase, putative ,Ras-related protein, putative	Vesicular transport	2.90067	0.00644979	0.799134
Tb927.2.5850	small nuclear ribonucleoprotein SmD2	RNA processing	4.91213	4.81287e-06	1.48867
Tb927.4.890	small nuclear ribonucleoprotein SmD3, putative	RNA processing	5.61909	5.62472e-05	1.13486
Tb927_10_v4.snoRNA.0019:snoRNA	snoRNA	SNO	12.9969	7.40279e-12	9.28664
Tb927_10_v4.snoRNA.0061:snoRNA	snoRNA	SNO	8.52333	2.6106e-06	8.43291
Tb927_10_v4.snoRNA.0026:snoRNA	snoRNA	SNO	35.4407	3.16021e-19	8.0135
Tb927_10_v4.snoRNA.0021:snoRNA	snoRNA	SNO	15.265	2.98304e-13	7.83103
Tb10_snoRNA_0034:snoRNA	snoRNA	SNO	7.1007	4.33656e-06	7.2051
Tb10_snoRNA_0049:snoRNA	snoRNA	SNO	8.58703	5.18838e-07	7.15097
Tb927_10_v4.snoRNA.0042:snoRNA	snoRNA	SNO	7.81206	1.74826e-06	6.74325
Tb927_10_v4.snoRNA.0011:snoRNA	snoRNA	SNO	13.8664	3.58805e-14	6.60417
Tb927_10_v4.snoRNA.0012:snoRNA	snoRNA	SNO	13.8664	3.58805e-14	6.60417
Tb927_10_v4.snoRNA.0013:snoRNA	snoRNA	SNO	13.8664	3.58805e-14	6.60417
Tb927_10_v4.snoRNA.0014:snoRNA	snoRNA	SNO	13.8664	3.58805e-14	6.60417
Tb927_10_v4.snoRNA.0028:snoRNA	snoRNA	SNO	6.22714	4.21147e-06	5.72223
Tb927_10_v4.snoRNA.0029:snoRNA	snoRNA	SNO	6.22714	4.21147e-06	5.72223
Tb927_10_v4.snoRNA.0030:snoRNA	snoRNA	SNO	6.22714	4.21147e-06	5.72223
Tb927_10_v4.snoRNA.0063:snoRNA	snoRNA	SNO	10.8764	9.48027e-08	5.53046
Tb927_10_v4.snoRNA.0015:snoRNA	snoRNA	SNO	18.1908	1.10919e-14	5.4566
Tb927_10_v4.snoRNA.0017:snoRNA	snoRNA	SNO	18.1908	1.10919e-14	5.4566
Tb927_10_v4.snoRNA.0041:snoRNA	snoRNA	SNO	11.1858	3.25152e-10	5.35313
Tb927_10_v4.snoRNA.0016:snoRNA	snoRNA	SNO	18.2892	7.29555e-15	5.22757
Tb927_10_v4.snoRNA.0018:snoRNA	snoRNA	SNO	25.0377	1.13807e-17	4.8383
Tb927_10_v4.snoRNA.0056:snoRNA	snoRNA	SNO	4.49077	0.00209882	4.12536
Tb927_10_v4.snoRNA.0046:snoRNA	snoRNA	SNO	6.44495	1.97909e-06	3.2481
Tb927_10_v4.snoRNA.0048:snoRNA	snoRNA	SNO	6.14254	3.06886e-05	2.17391
Tb10_snoRNA_0084:snoRNA	snoRNA	SNO	13.1286	4.44392e-09	1
Tb927.2.5680	snRNA	0	5.7327	1.6428e-05	2.13502
Tb09.v1.0380	spermidine synthase	Redox pathways	2.79741	0.0034479	0.875653
Tb11.02.4200	splicing factor Prp31	Glucose & glycerol	4.41182	0.00021122	1.24927
Tb927.8.2861	SRP RNA, 7SL	Vesicular transport	8.81749	8.75466e-11	6.00218
Tb927.7.6380	ssm4 protein, putative	RNA processing	5.72919	3.37938e-06	1.47819
Tb927.3.2230	succinyl-CoA synthetase alpha subunit, putative	Citric acid cycle	2.68557	0.00424112	0.223876
Tb927.7.3750	TFIIF-stimulated CTD phosphatase, putative	Protein phosphatase	3.46086	0.000394259	1.18806
Tb927.3.3380	TFIIF-stimulated CTD phosphatase, putative	Protein phosphatase	2.94825	0.00308452	0.752408
Tb09.160.2020	thioredoxin	Redox pathways	2.72441	0.0096726	1.25645
Tb927.3.4240	thioredoxin, putative	Redox pathways	4.07367	0.00211403	0.763918
Tb927.8.5030	trafficking protein particle complex subunit 3, putative ,TRAPP, putative ,transport protein particle (TRAPP) component, Bet3, putative	Vesicular transport	3.01722	0.00320231	0.829721
Tb927.10.4840	transcription factor IIa, putative	RNA synthesis II	3.12812	0.00379028	1.57221
Tb927.4.3590	translation elongation factor 1-beta, putative	Translation	2.67482	0.00468779	0.260875
Tb927.4.3570	translation elongation factor 1-beta, putative	Translation	2.654	0.00504021	0.259401
Tb09.211.0790	tRNA (guanine-N(7)-)-methyltransferase, putative ,methyltransferase, putative	rRNA-tRNA processing	3.0436	0.00416466	1.03336
Tb927.10.4870	tRNA-dihydrouridine synthase 2, putative	rRNA-tRNA processing	3.35832	0.00416466	0.808116
Tb927.3.3760	tryparedoxin	Redox pathways	3.66252	0.000106143	0.240549
Tb927.3.3780	tryparedoxin	Redox pathways	3.61078	0.000132666	0.237722
Tb927.4.3390	tuzin, putative	Cytoskeleton	3.15576	0.00174155	0.806942
Tb927.8.5330	tyrosyl/methionyl-tRNA synthetase, putative	Translation tRNA	3.02923	0.00334569	1.0243
Tb927.8.4830	U1 small nuclear ribonucleoprotein, putative	RNA processing	3.7476	0.00388079	0.816369
Tb927.8.5180	U6 snRNA-associated sm-like protein Lsm2	RNA processing	4.47639	9.91004e-05	0.721401
Tb927.7.7380	U6 snRNA-associated Sm-like protein LSm3p	RNA processing	6.02296	0.00890753	1.0722
Tb927.6.4340	U6 snRNA-associated Sm-like protein LSm5p	RNA processing	3.04322	0.00455407	1.2234
Tb11.02.5410	ubiquitin activating enzyme, putative	Ubiquitin & proteasome	4.29382	0.00227606	1.38727
Tb927.4.3460	ubiquitin-conjugating enzyme e2, putative ,ubiquitin carrier protein, putative ,ubiquitin-protein ligase, putative	Ubiquitin & proteasome	2.73206	0.00413997	1.24641
Tb927.4.3190	ubiquitin-conjugating enzyme e2, putative ,ubiquitin carrier protein, putative ,ubiquitin-protein ligase, putative	Ubiquitin & proteasome	3.04868	0.00265541	0.994363
Tb927.8.920	ubiquitin-conjugating enzyme e2, putative ,ubiquitin-protein ligase, putative ,ubiquitin carrier protein, putative	Ubiquitin & proteasome	3.50573	0.00172902	0.895697
Tb927.7.3680	ubiquitin/ribosomal protein S27a, putative	Ribosome	4.07713	3.2805e-05	1.70238
Tb927.10.5030	ubiquitin/ribosomal protein S27a, putative	Ribosome	5.6427	2.1901e-07	1
Tb927.4.1640	UDP-galactose transporter, putative	Glycan synthesis & metabolism	2.8437	0.00307085	0.732547
Tb927.10.6070	universal minicircle sequence binding protein (UMSBP), putative ,predicted zinc finger protein	Mitochondrial DNA	2.67993	0.00628516	0.619696
Tb927.10.13970	uracil-DNA glycosylase, putative	DNA synthesis, modification, repair	2.89094	0.00303713	0.826285
Tb927.6.5050	V-type ATPase, C subunit, putative	Lysosome	2.68068	0.00505375	0.858067
Tb927.8.2100	vacuolar ATP synthase 16 kDa proteolipid subunit, putative	Lysosome	2.95848	0.00220944	1.54216
Tb927.10.200	vacuolar ATP synthase, putative	Lysosome	3.19661	0.00060981	1
Tb11.02.5470	vacuolar type h%2B ATPase subunit, putative	Lysosome	3.36032	0.000599424	1.2115
Tb927.7.1840	zinc finger protein, putative	Zinc finger	3.46927	0.000404273	1.09557
Tb927.7.1880	zinc finger protein, putative	Zinc finger	3.46927	0.000404273	1.09557
Tb11.02.2180	#N/A	0	4.03644	0.00768913	0.9183
Tb10.v4.0032	#N/A	ESAG	6.02928	3.23169e-06	0.917303
Tb10.v4.0040	#N/A	RNA processing	3.03449	0.00137187	0.903482
Tb927.6.1857	#N/A	SNO	8.25019	9.42534e-08	12.1421
Tb09_snoRNA_0094	#N/A	SNO	17.5751	1.33114e-15	12.1217
Tb09_snoRNA_0118	#N/A	SNO	17.0056	1.83545e-14	11.9385
Tb09_snoRNA_0100	#N/A	SNO	17.8159	2.96661e-16	11.9339
Tb09_snoRNA_0106	#N/A	SNO	17.8159	2.96661e-16	11.9339
Tb11_snoRNA_0008	#N/A	SNO	6.9345	5.74561e-07	11.0377
Tb11_snoRNA_0002	#N/A	SNO	6.71777	5.87216e-07	11.0182
Tb11_snoRNA_0020	#N/A	SNO	6.71777	5.87216e-07	11.0182
Tb11_snoRNA_0026	#N/A	SNO	6.74064	5.47864e-07	10.7934
Tb09_snoRNA_0095	#N/A	SNO	6.74946	2.88655e-06	10.1515
Tb09_snoRNA_0107	#N/A	SNO	6.74946	2.88655e-06	10.1515
Tb927.6.1865	#N/A	SNO	6.71904	3.2805e-05	9.2951
Tb11_snoRNA_0010	#N/A	SNO	4.31343	0.00224871	9.25224
Tb11_snoRNA_0022	#N/A	SNO	5.53863	0.000127756	9.16843
Tb09_snoRNA_0015	#N/A	SNO	7.72095	2.42549e-05	8.832
Tb09_snoRNA_0024	#N/A	SNO	7.72095	2.42549e-05	8.832
Tb09_snoRNA_0033	#N/A	SNO	7.72095	2.42549e-05	8.832
Tb09_snoRNA_0042	#N/A	SNO	7.72095	2.42549e-05	8.832
Tb09_snoRNA_0060	#N/A	SNO	7.72095	2.42549e-05	8.832
Tb09_snoRNA_0069	#N/A	SNO	7.72095	2.42549e-05	8.832
Tb09_snoRNA_0099	#N/A	SNO	28.7155	5.97801e-19	8.56472
Tb09_snoRNA_0016	#N/A	SNO	7.29802	4.72382e-05	8.35843
Tb09_snoRNA_0105	#N/A	SNO	27.6992	1.12525e-18	8.11691
Tb927.6.1855	#N/A	SNO	31.0116	5.56601e-18	7.86579
Tb927.6.1863	#N/A	SNO	31.0116	5.56601e-18	7.86579
Tb927.6.1871	#N/A	SNO	31.0116	5.56601e-18	7.86579
Tb11_snoRNA_0004	#N/A	SNO	4.51313	0.00232169	7.49547
Tb11_snoRNA_0016	#N/A	SNO	4.51313	0.00232169	7.49547
Tb11_snoRNA_0028	#N/A	SNO	4.51313	0.00232169	7.49547
Tb927.6.1852	#N/A	SNO	10.2491	9.45298e-11	7.15498
Tb927.6.1867	#N/A	SNO	10.2491	9.45298e-11	7.15498
Tb927.6.1883	#N/A	SNO	10.2491	9.45298e-11	7.15498
Tb927.8.2252	#N/A	SNO	11.7379	3.83618e-08	7.06785
Tb927.6.1859	#N/A	SNO	10.769	4.15552e-11	6.98251
Tb09_snoRNA_0011	#N/A	SNO	18.4828	1.00252e-15	6.97967
Tb09_snoRNA_0020	#N/A	SNO	18.4828	1.00252e-15	6.97967
Tb09_snoRNA_0029	#N/A	SNO	18.4828	1.00252e-15	6.97967
Tb09_snoRNA_0038	#N/A	SNO	18.4828	1.00252e-15	6.97967
Tb09_snoRNA_0047	#N/A	SNO	18.4828	1.00252e-15	6.97967
Tb09_snoRNA_0056	#N/A	SNO	18.4828	1.00252e-15	6.97967
Tb09_snoRNA_0065	#N/A	SNO	18.4828	1.00252e-15	6.97967
Tb09_snoRNA_0090	#N/A	SNO	4.19593	0.00271851	6.39442
Tb09_snoRNA_0085	#N/A	SNO	4.12742	0.00547355	6.37001
Tb927.6.1876	#N/A	SNO	10.7092	4.67772e-08	6.22252
Tb927.6.1874	#N/A	SNO	10.8583	1.49632e-07	6.04121
Tb927.6.1882	#N/A	SNO	10.8583	1.49632e-07	6.04121
Tb927.6.1889	#N/A	SNO	10.8583	1.49632e-07	6.04121
Tb927.8.2064	#N/A	SNO	10.2372	1.67926e-09	6.02414
Tb927.6.1853	#N/A	SNO	12.4158	2.93431e-12	5.81693
Tb927.6.1861	#N/A	SNO	12.4158	2.93431e-12	5.81693
Tb927.6.1868	#N/A	SNO	12.4158	2.93431e-12	5.81693
Tb927.6.1884	#N/A	SNO	12.4158	2.93431e-12	5.81693
Tb927.8.2086	#N/A	SNO	11.3531	8.63743e-09	5.74145
Tb11_snoRNA_0039	#N/A	SNO	15.2861	1.62469e-12	5.58897
Tb09_snoRNA_0080	#N/A	SNO	5.09529	7.86796e-05	5.31471
Tb09_snoRNA_0074	#N/A	SNO	20.751	7.29557e-17	4.76996
Tb09_snoRNA_0036	#N/A	SNO	13.9289	1.68165e-09	2.38872
Tb09_snoRNA_0063	#N/A	SNO	15.555	3.27392e-12	2.04745
Tb09_snoRNA_0027	#N/A	SNO	16.1511	1.25199e-12	1.82984
Tb09_snoRNA_0054	#N/A	SNO	15.782	2.41352e-12	1.82984
Tb09_snoRNA_0018	#N/A	SNO	15.6095	3.08168e-12	1.82984
Tb09_snoRNA_0045	#N/A	SNO	15.6095	3.08168e-12	1.82984
Tb09_snoRNA_0072	#N/A	SNO	15.6095	3.08168e-12	1.82984
Tb09_snoRNA_0017	#N/A	SNO	16.5493	2.84963e-15	1
Tb09_snoRNA_0044	#N/A	SNO	16.5493	2.84963e-15	1
Tb09_snoRNA_0071	#N/A	SNO	16.5493	2.84963e-15	1
Tb09_snoRNA_0035	#N/A	SNO	16.4926	2.93796e-15	1
Tb09_snoRNA_0053	#N/A	SNO	15.8974	7.29555e-15	1
Tb09_snoRNA_0026	#N/A	SNO	15.1263	2.3025e-14	1
Tb09_snoRNA_0062	#N/A	SNO	15.092	2.37245e-14	1

## Sheet: RRP45 down
geneID v5	Description	Class	foldChange (RRP45/WT)	padj	HL change RRP45/WT
Tb09.v4.0014	#N/A	0	5.44266	0.00145556	0.0473227
Tb927.4.2740	hypothetical protein, conserved	0	3.32249	0.000912494	0.0558069
Tb11.01.5680	hypothetical protein, conserved	0	7.16092	7.19e-05	0.0593034
Tb927.5.2000	hypothetical protein	0	8.98124	2.7e-05	0.0933711
Tb927.10.5810	hypothetical protein, conserved	0	9.43592	2.48e-07	0.0952184
Tb927.3.4270	hypothetical protein, conserved	0	11.8661	2.77e-11	0.101025
Tb927.7.2190	hypothetical protein, conserved	0	4.00784	0.000147253	0.130292
Tb927.7.4470	hypothetical protein, conserved	0	25.3503	1.38e-14	0.157089
Tb927.6.5070	hypothetical protein, conserved	0	4.07749	6.87e-05	0.182574
Tb927.6.3840	reticulon domain protein	0	15.0606	4.88e-06	0.189507
Tb927.10.8940	hypothetical protein, conserved	0	23.8884	1.96e-10	0.200347
Tb11.02.1200	hypothetical protein, conserved	0	2.93866	0.00416466	0.201111
Tb11.02.5680	hypothetical protein, conserved	0	4.40245	0.00043161	0.201934
Tb11.03.0240	hypothetical protein, conserved	0	3.99905	2.7e-05	0.212695
Tb927.4.1230	hypothetical protein	0	4.78248	1.48e-05	0.21276
Tb927.2.4580	hypothetical protein, conserved	0	4.58484	0.000407547	0.213199
Tb927.5.310	hypothetical protein	0	9.89922	8.82e-10	0.227658
Tb11.02.0210	hypothetical protein, conserved	0	3.69519	0.000706979	0.239462
Tb927.4.4040	hypothetical protein, conserved	0	6.33935	2.4e-06	0.243105
Tb927.3.3060	hypothetical protein, conserved	0	5.66234	0.000200541	0.263566
Tb927.10.2190	hypothetical protein, conserved	0	6.61013	6.1e-07	0.280327
Tb927.7.6090	hypothetical protein, conserved	0	7.47508	3.55e-09	0.280415
Tb927.3.5370	hypothetical protein, conserved	0	3.24285	0.00200208	0.299304
Tb927.7.5210	hypothetical protein, conserved	0	6.73083	1.64e-08	0.303621
Tb11.50.0001	hypothetical protein, conserved	0	3.56925	0.00053708	0.316301
Tb927.10.8830	hypothetical protein, conserved	0	6.71506	6.4e-08	0.325671
Tb927.7.2640	hypothetical protein, conserved	0	11.9115	4.98e-07	0.326658
Tb927.6.3180	hypothetical protein, conserved	0	5.49548	1.26e-05	0.336546
Tb11.01.6380	hypothetical protein, conserved	0	5.29248	2.89e-06	0.337888
Tb11.02.1690	hypothetical protein, conserved	0	4.6455	5.23e-05	0.344531
Tb927.8.5760	hypothetical protein, conserved	0	4.71305	5.61e-06	0.35437
Tb927.10.390	hypothetical protein, conserved	0	5.67665	4.78e-05	0.356523
Tb927.10.15700	hypothetical protein, conserved	0	51.165	1.03e-21	0.358345
Tb927.3.1900	hypothetical protein, conserved	0	19.3622	7.58e-15	0.392298
Tb927.4.4570	hypothetical protein, conserved	0	5.27209	4.46e-05	0.395517
Tb11.02.0357	hypothetical protein, conserved	0	4.64666	3.41e-05	0.398108
Tb11.02.0010	hypothetical protein, conserved	0	5.58271	1.89e-05	0.411491
Tb927.4.3060	hypothetical protein, conserved	0	7.85139	1.96e-07	0.41807
Tb927.7.6690	hypothetical protein	0	16.5065	1.81e-05	0.447217
Tb927.5.2620	hypothetical protein, conserved	0	21.9168	1.19e-12	0.460422
[truncated: 1,441 more rows]

## Sheet: Class enrichment
These tables are based on unique coding genes only, unlike the detailed tables in the other sheets.
[truncated: 48 more rows]
