# Supplementary material
Source: HighWire-hosted journal article supplement (doi:10.1101/rna.038430.113)

Supplementary Figure S4

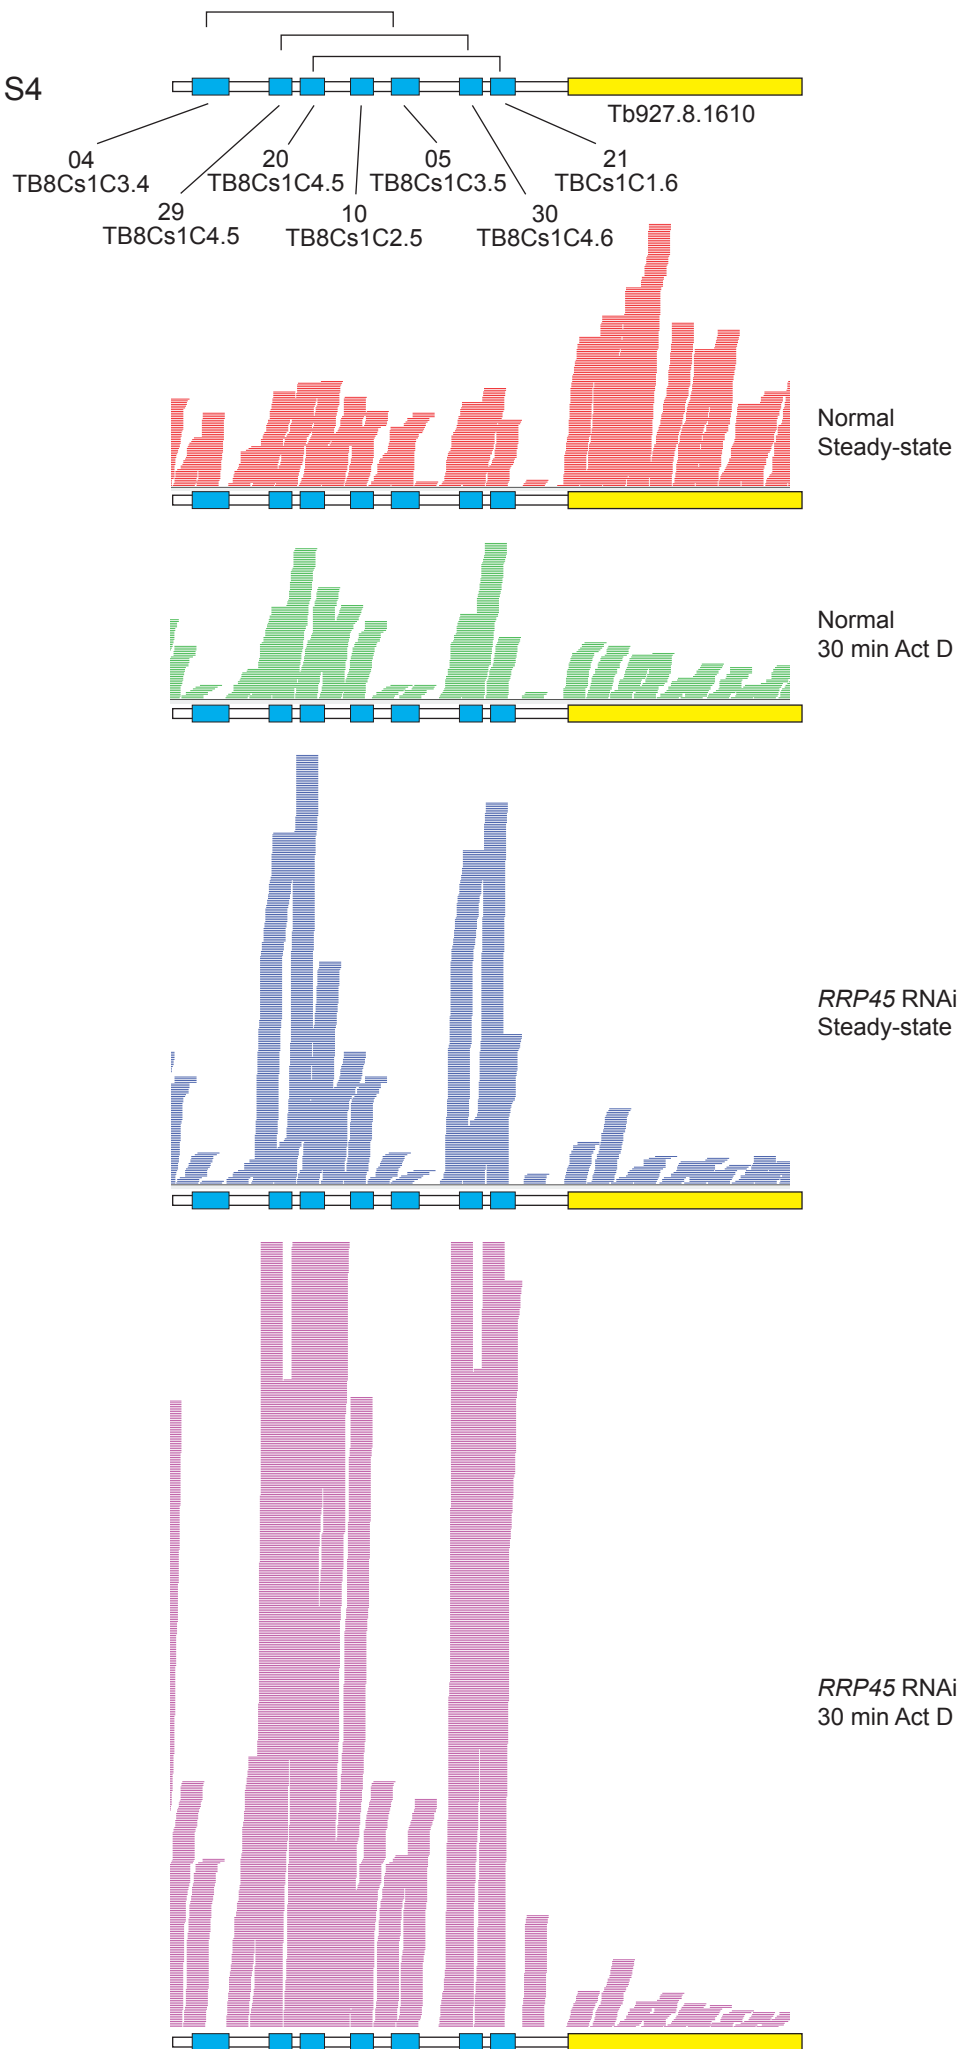

Supplement: Supplementary_Figure_S4.pdf [file Supplementary_Figure_S4.pdf]
